# Supplementary material
Source: PubMed Central journal article supplement (PMC11298965)

## Table of Contents

1. mApoSyl1 - *Apodemus sylvaticus* - Wood mouse
2. mBalAcu1 - *Balaenoptera acutorostrata* - Minke whale
3. mCamDro1 - *Camelus dromedarius* - Dromedary
4. mCerEla1 - *Cervus elaphus* - Red Deer
5. mChiNiv1 - *Chionomys nivalis* - European snow vole
6. mCorTow1.0 - *Corynorhinus townsendii* - Townsend's Big-eared Bat
7. mDasNov1 - *Dasyopus novemcinctus* - Nine-banded armadillo
8. mDelDel1 - *Delphinus delphis* - Saddleback dolphin
9. mDicBic1 - *Diceros bicornis* - Black rhinoceros
10. mDipMer1 - *Dipodomys merriami* - Merriam's Kangaroo Rat
11. mEleMax1 - *Elephas maximus* - Asiatic Elephant
12. mEptNil1 - *Eptesicus nilssonii* - Northern bat
13. mEriEur2 - *Erinaceus europaeus* - Western European hedgehog
14. mEscRob2 - *Eschrichtius robustus* - Grey whale
15. mEubGla1 - *Eubalaena glacialis* - North Atlantic right whale
16. mGloMel1 - *Globicephala melas* - Long-finned pilot whale
17. mGorGor1 - *Gorilla gorilla* - Gorilla
18. mHetBru1 - *Heterohyrax brucei* - Yellow-spotted hyrax
19. mHipAmp2 - *Hippopotamus amphibius kiboko* - Hippopotamus
20. mHypAmp2 - *Hyperoodon ampullatus* - Northern bottlenose whale
21. mLagAlb1 - *Lagenorhynchus albirostris* - White-beaked dolphin
22. mLemCat1 - *Lemur catta* - Ring-tailed lemur
23. mLynRuf1 - *Lynx rufus* - Bobcat
24. mMacEug1 - *Macropus eugenii* - Tammar wallaby
25. mManPen7 - *Manis pentadactyla* - Chinese pangolin
26. mMarMar1 - *Martes martes* - European pine marten
27. mMelMel3 - *Meles meles* - European badger
28. mMesDen1 - *Mesoplodon densirostris* - Blainville's beaked whale
29. mMicCal1.0 - *Microtus californicus* - California Vole
30. mMicMin1 - *Micromys minutus* - European harvest mouse
31. mMirAng1 - *Mirounga angustirostris* - Northern Elephant Seal
32. mMonDom1 - *Monodelphis domestica* - Gray short-tailed opossum
33. mMunRee1 - *Muntiacus reevesi* - Reeves' muntjac
34. mMusAve1 - *Muscardinus avellanarius* - Hazel dormouse
35. mMusLut2 - *Mustela lutreola* - European mink
36. mMusNiv1 - *Mustela nivalis* - Least weasel
37. mMyoDau2 - *Myotis daubentonii* - Daubenton's bat
38. mMyoYum1.0 - *Myotis yumanensis* - Yuma myotis
39. mNeoNeb1 - *Neofelis nebulosa* - Clouded Leopard
40. mNycCou1 - *Nycticebus coucang* - Slow loris
41. mOrcOrc1 - *Orcinus orca* - Killer whale
42. mOryCun1 - *Oryctolagus cuniculus* - Rabbit
43. mPanPan1 - *Pan paniscus* - Bonobo
44. mPerMan1 - *Peromyscus maniculatus* - Deer mouse
45. mPhoPho1 - *Phocoena phocoena* - Harbor porpoise
46. mPipPyg2 - *Pipistrellus pygmaeus* - Soprano pipistrelle
47. mPleAur1 - *Plecotus auritus* - Brown big-eared bat
48. mPonAbe1 - *Pongo abelii* - Sumatran orangutan
49. mPonPyg2 - *Pongo pygmaeus* - Bornean orangutan
50. mPseCra1 - *Pseudorca crassidens* - False killer whale
51. mPumCon1.1 - *Puma concolor* - Mountain Lion
52. mSorAra2/1 - *Sorex araneus* - Common shrew
53. mSteCoe1 - *Stenella coeruleoalba* - Striped dolphin
54. mTalEur1 - *Talpa europaea* - European mole
55. mThoBot1 - *Thomomys bottae* - Botta's pocket gopher
56. mUrsAme1 - *Ursus americanus* - American black bear
57. mUrsArc2 - *Ursus arctos* - Brown bear
58. mVesMur1 - *Vespertilio murinus* - Particolored bat
59. rAllMis2 - *Alligator mississippiensis* - American alligator
60. rCarCar2 - *Caretta caretta* - Loggerhead turtle
61. rEmyOrb1 - *Emys orbicularis* - European pond turtle
62. rEryReg1 - *Erythrolamprus reginae* - Royal ground snake
63. rLiaOli1 - *Liasis olivaceus* - Olive python
64. rLiaOli2 - *Liasis olivaceus* - Olive python
65. rMalTer1 - *Malaclemys terrapin* - Diamondback terrapin
66. rPodCre2 - *Podarcis cretensis* - Cretan wall lizard
67. rPodRaf1 - *Podarcis raffonei* - Aeolian wall lizard
68. rRhiFlo1 - *Rhineura floridana* - Florida worm lizard
69. rVipLat1 - *Vipera latastei* - Snub-nosed viper
70. rVipUrs1 - *Vipera ursinii* - Hungarian meadow viper
71. rZooViv1 - *Zootoca vivipara* - Common lizard

Note: This supplementary material only displays alternate IG loci if they are longer than one-quarter of the corresponding primary IG locus length. Loci shorter than this threshold are typically too fragmented to be shown. 18 species had alternate IGH loci shorter than this threshold and are not shown.

Species ID: mApoSyl1

Common Name: wood mouse

Scientific Name: Apodemus sylvaticus

Assembly Type: Not Haplotype Resolved

Data Source: VGP

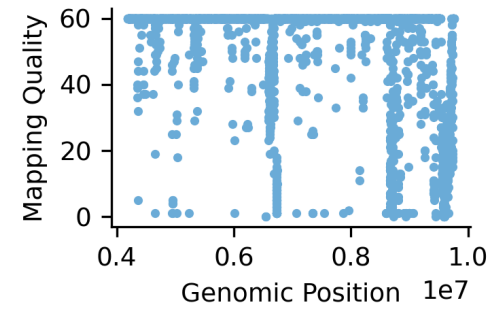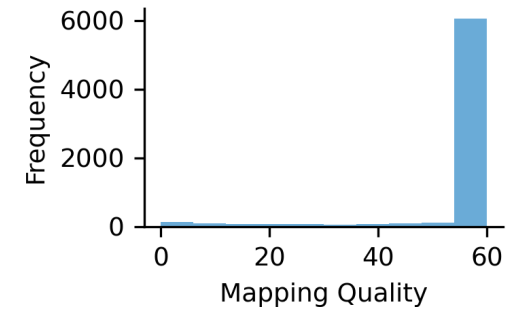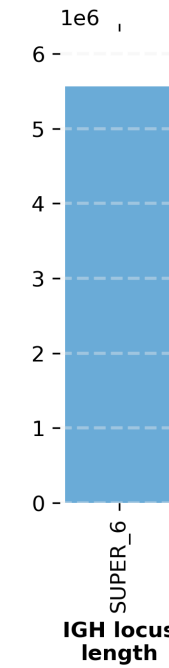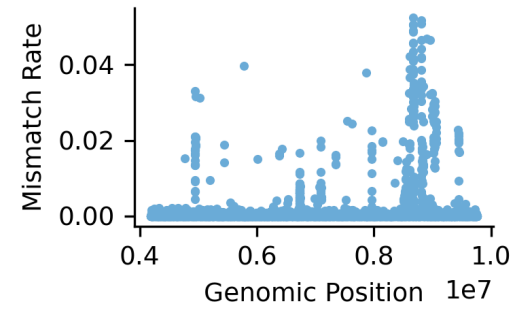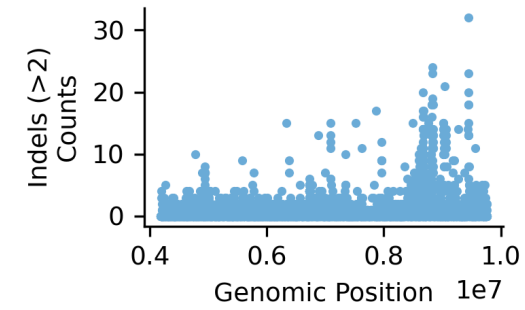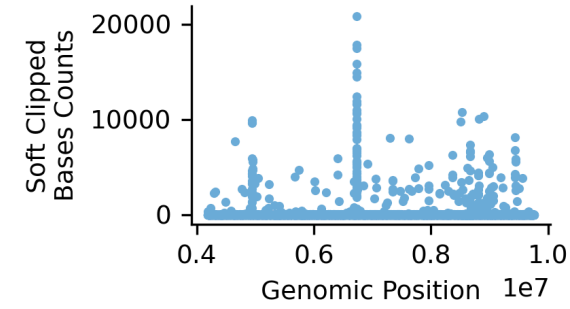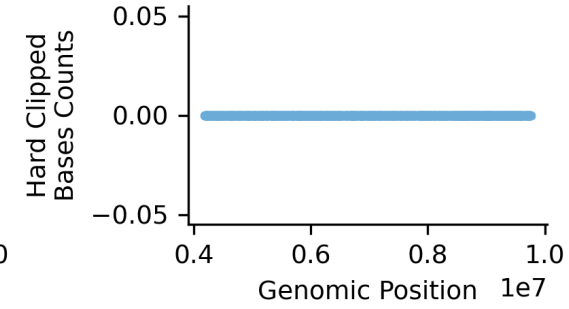

● SUPER\_6

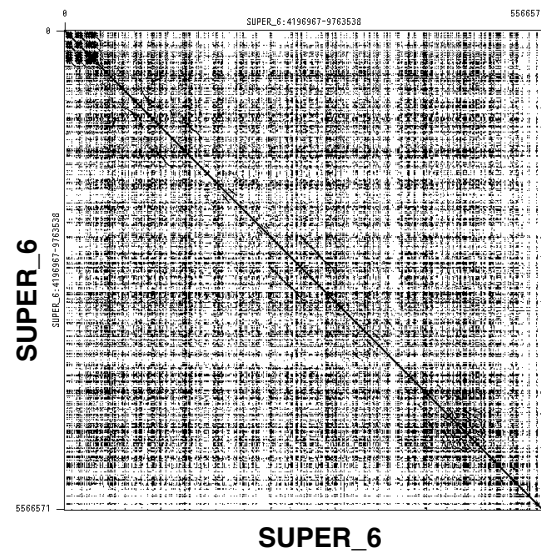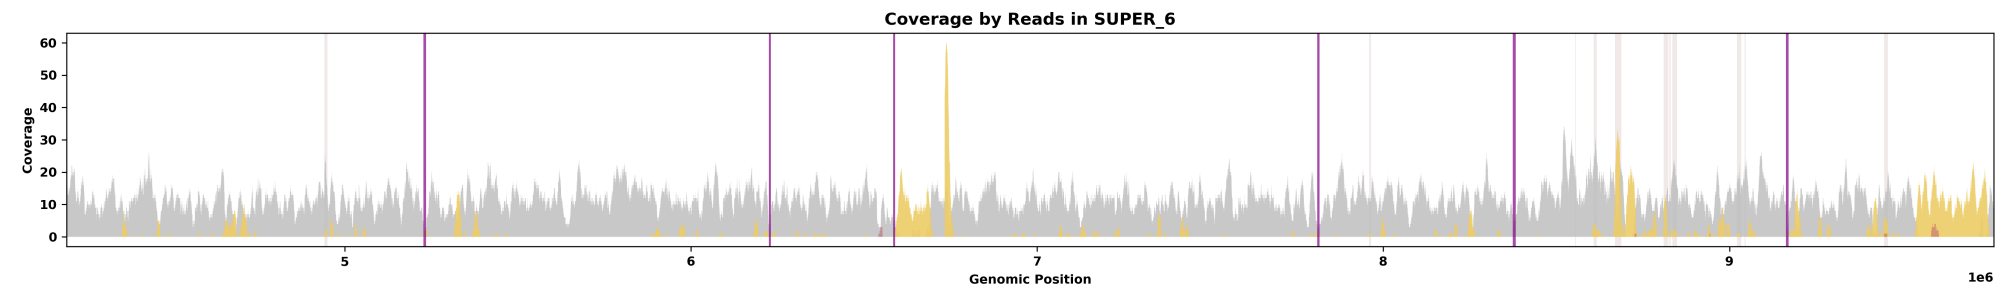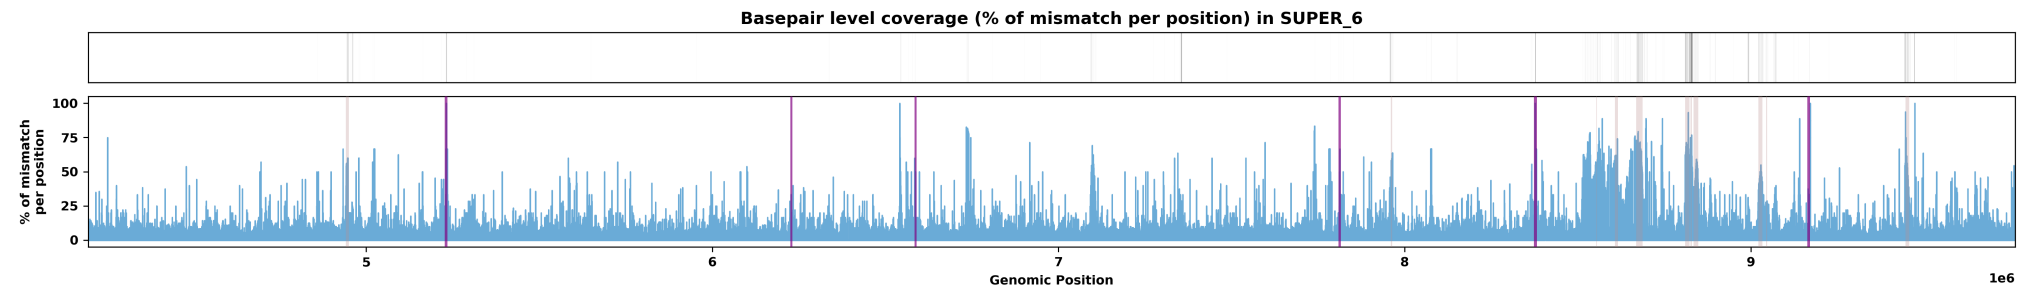

Species ID: mBalAcu1  
 Common Name: minke whale  
 Scientific Name: Balaenoptera\_acutorostrata  
 Assembly Type: Not Haplotype Resolved  
 Data Source: VGP

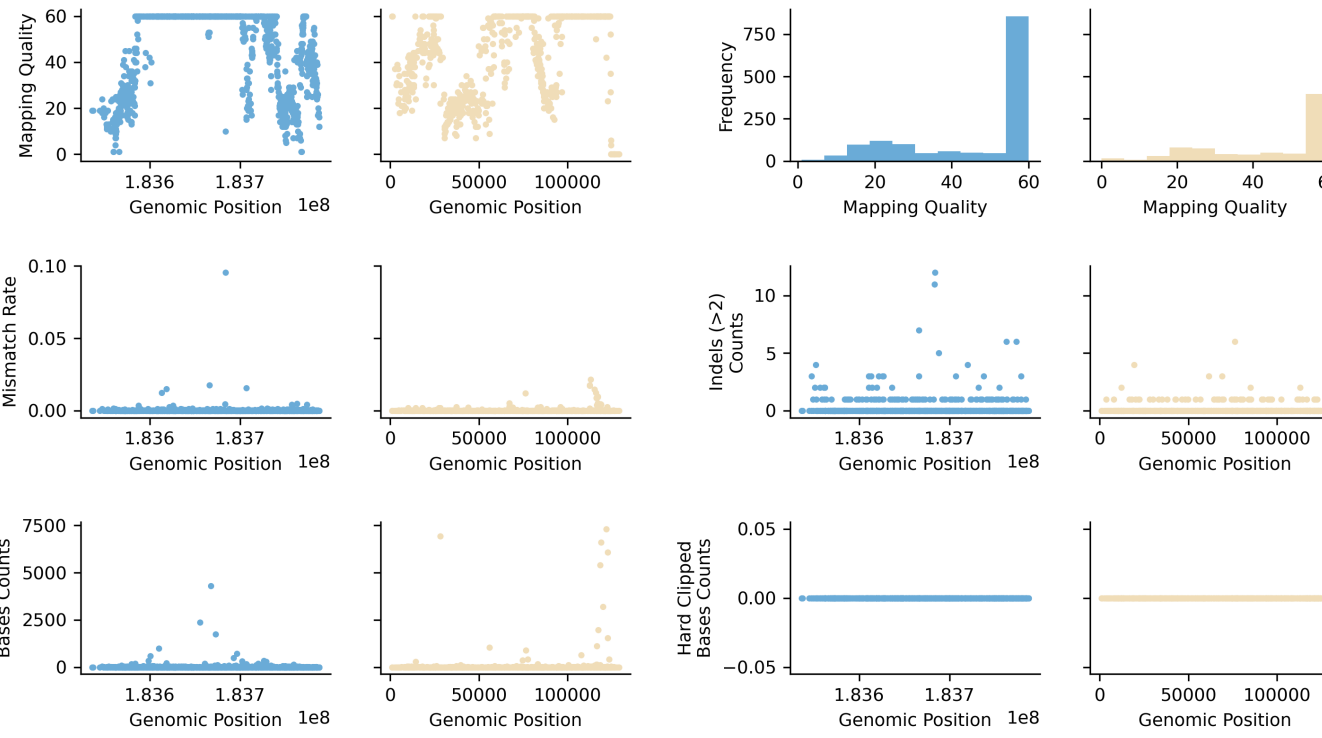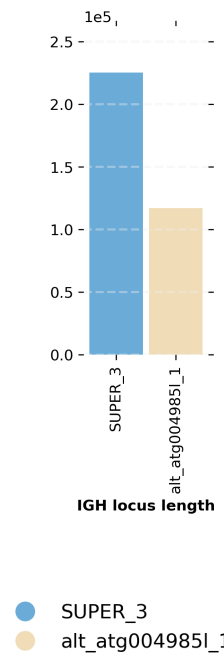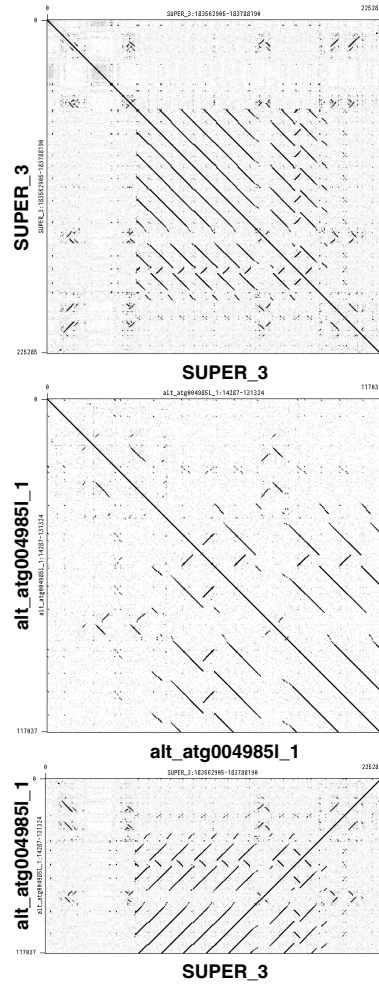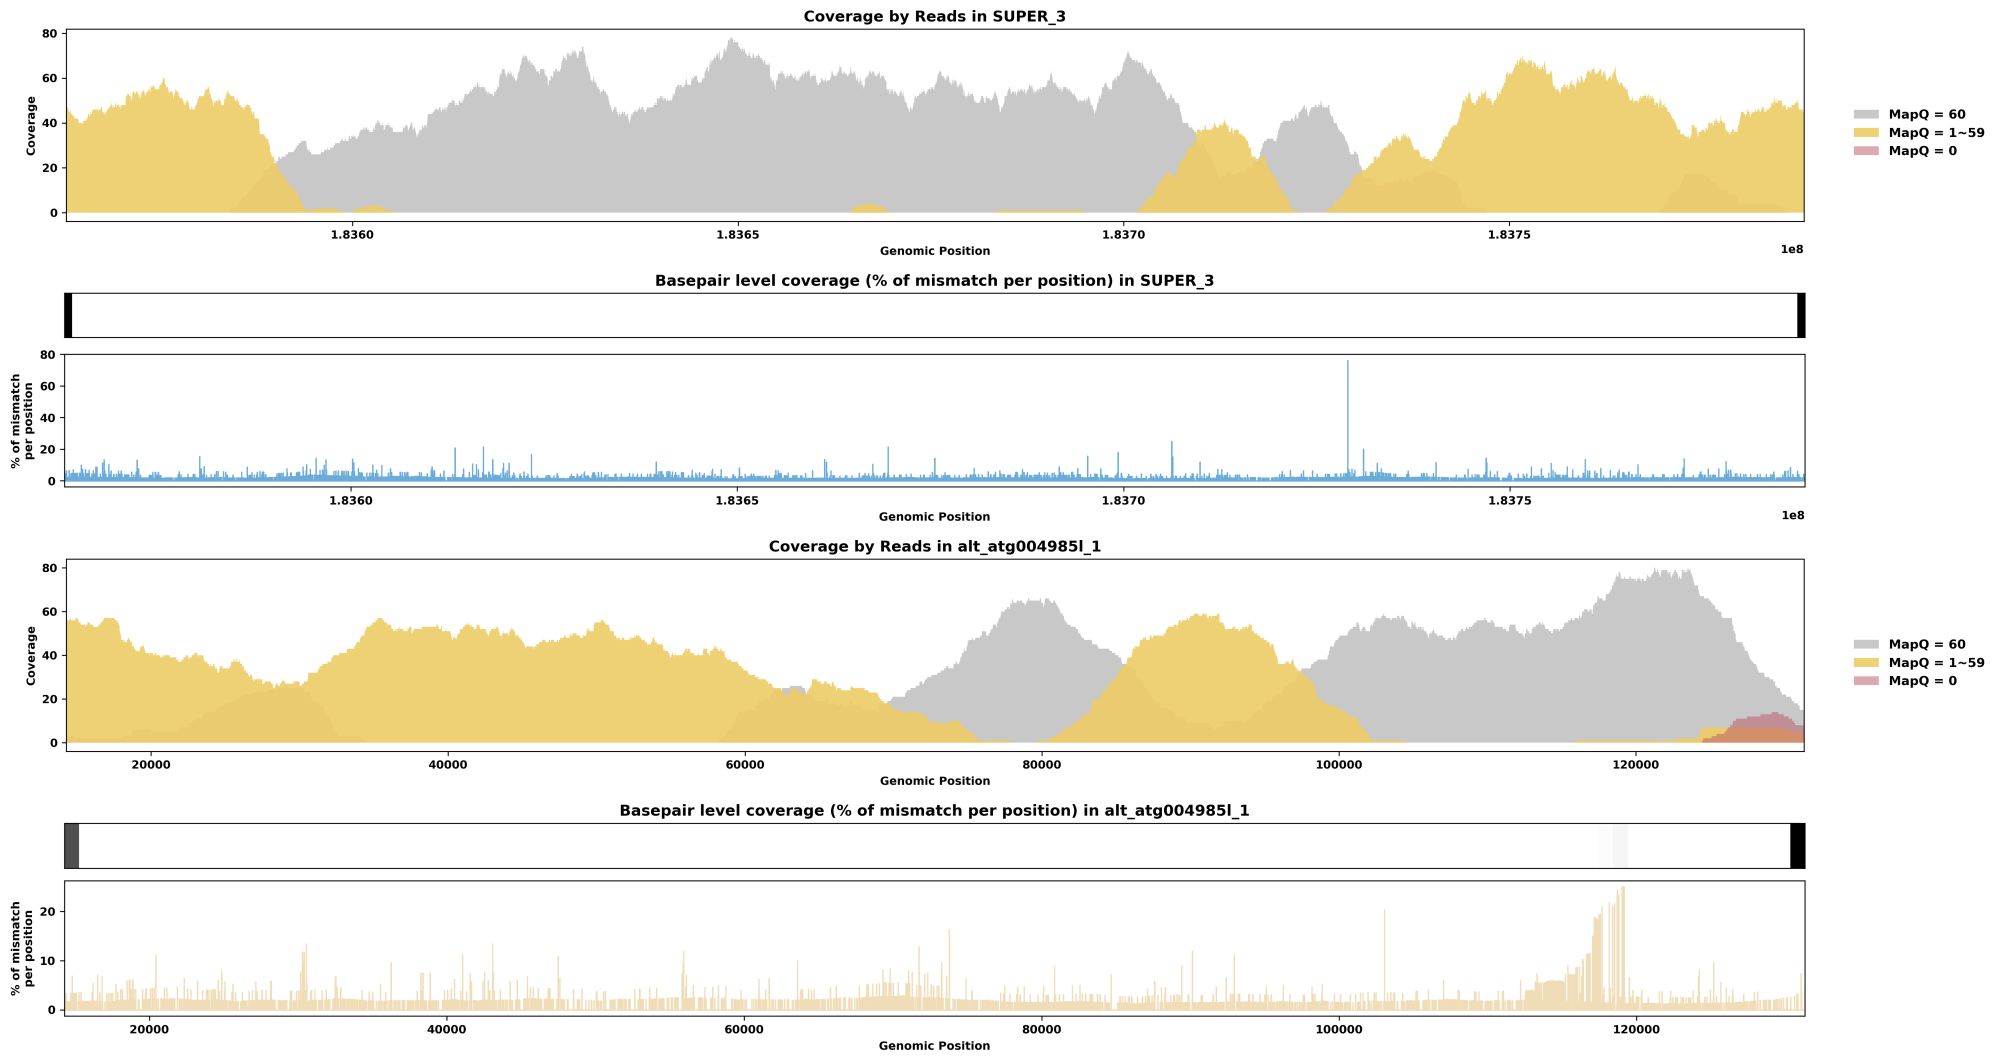

Species ID: mCamDro1  
 Common Name: dromedary  
 Scientific Name: Camelus dromedarius  
 Assembly Type: Haplotype Resolved  
 Data Source: VGP

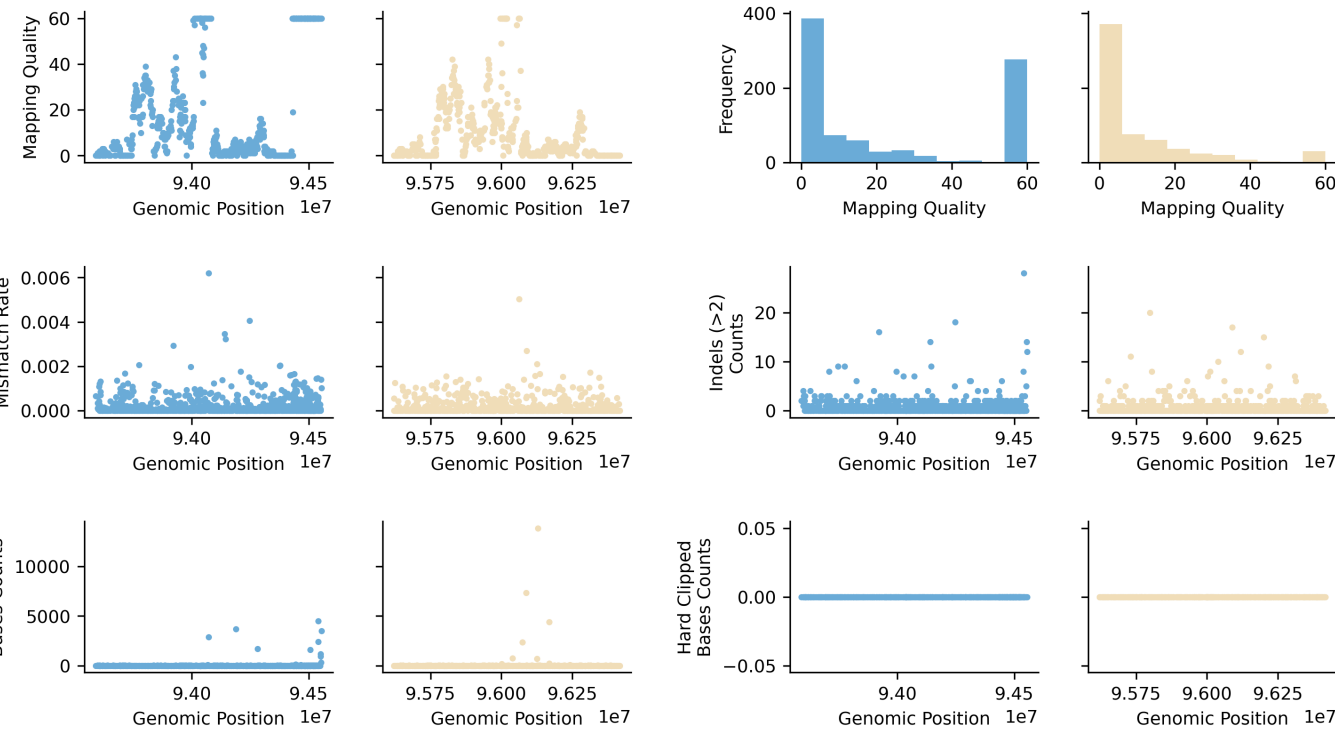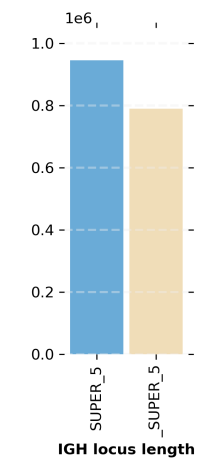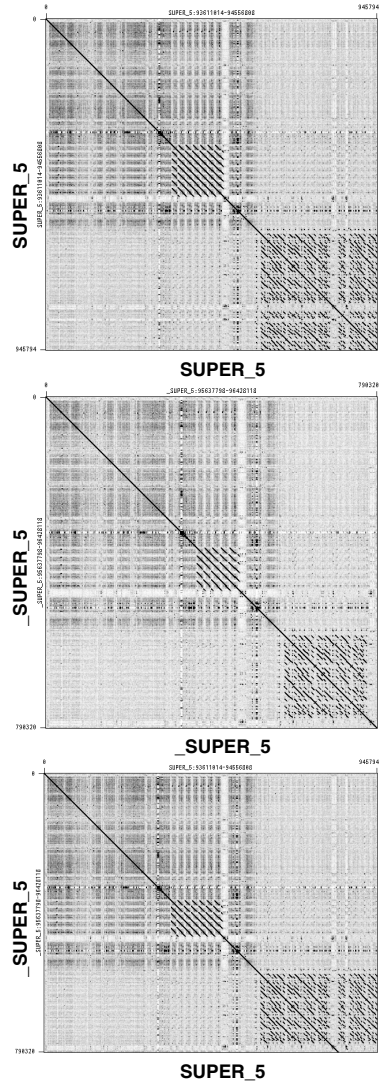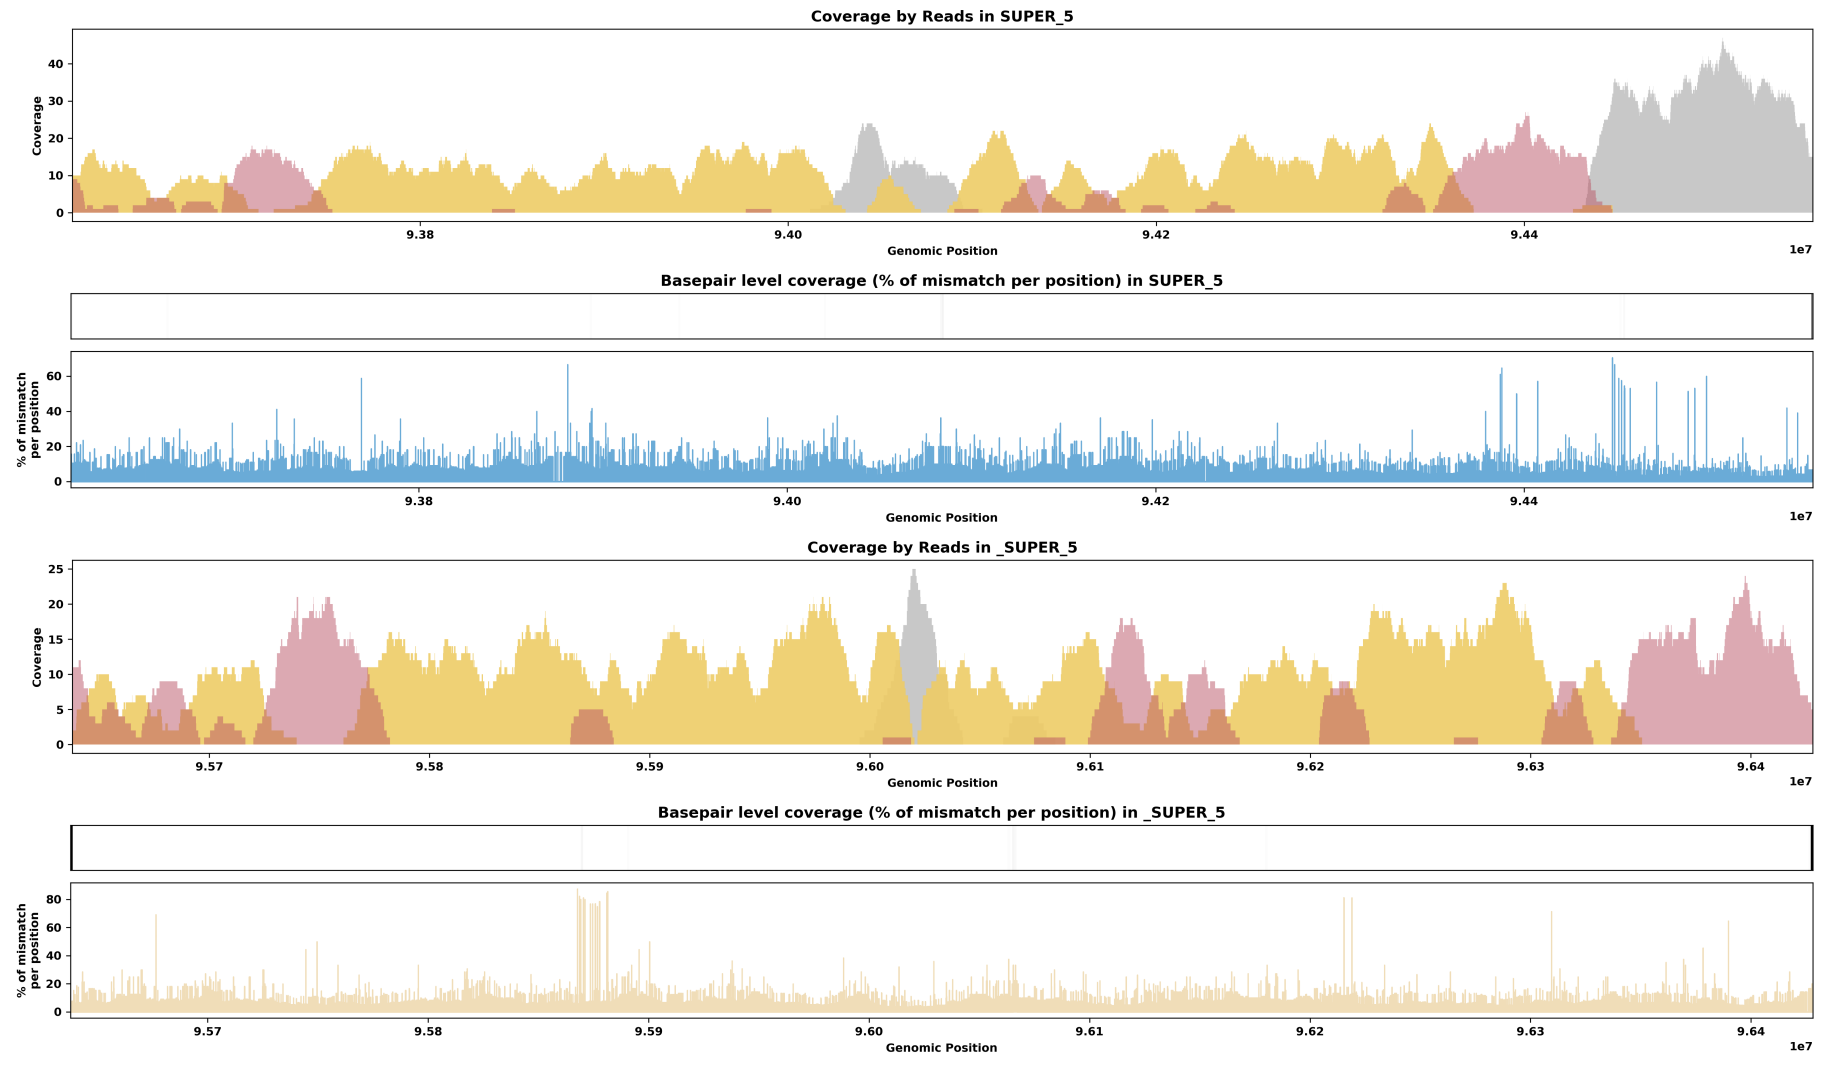

MapQ = 60  
 MapQ = 1-59  
 MapQ = 0

MapQ = 60  
 MapQ = 1-59  
 MapQ = 0

Species ID: mCerEla1  
 Common Name: Red Deer  
 Scientific Name: Cervus\_elaphus  
 Assembly Type: Not Haplotype Resolved  
 Data Source: VGP

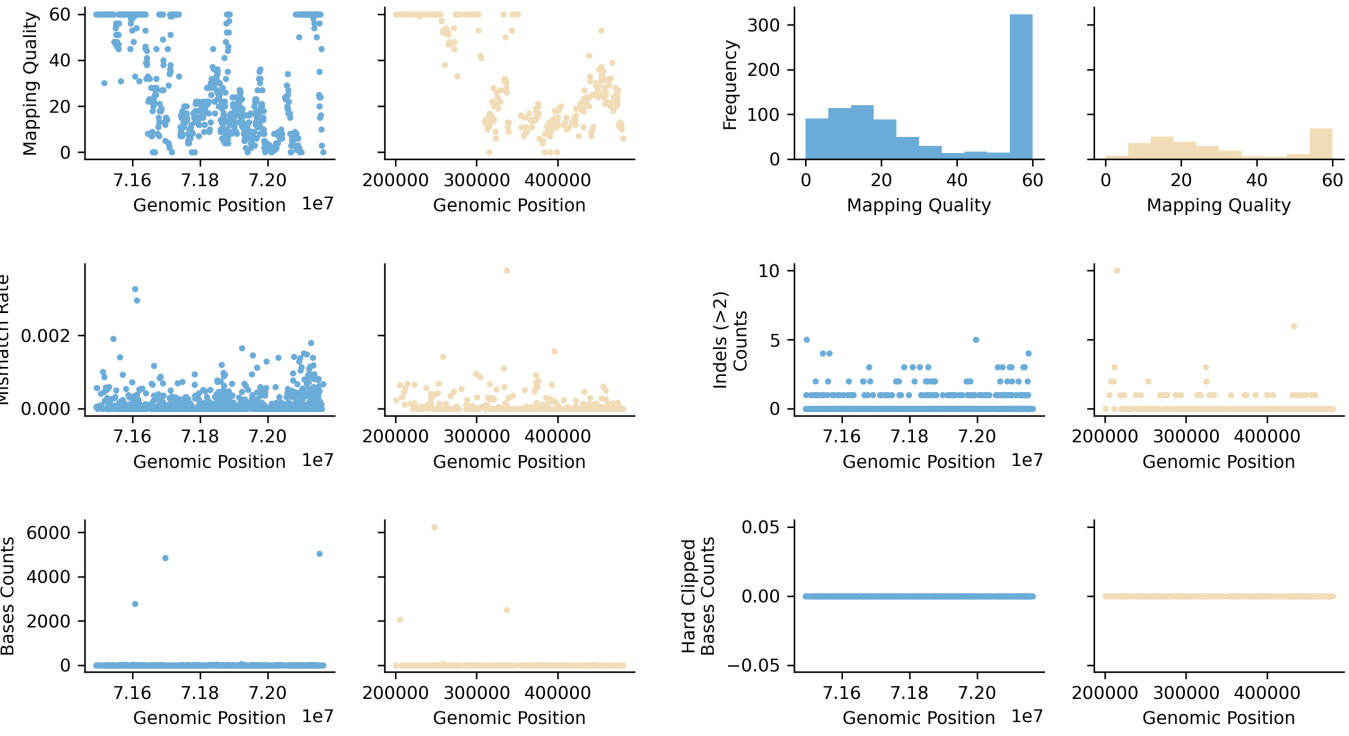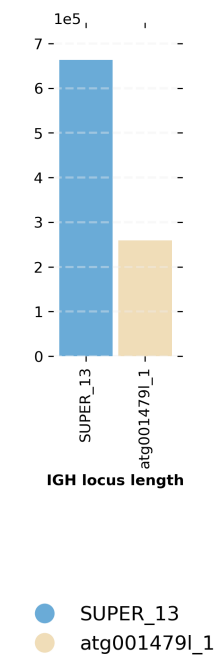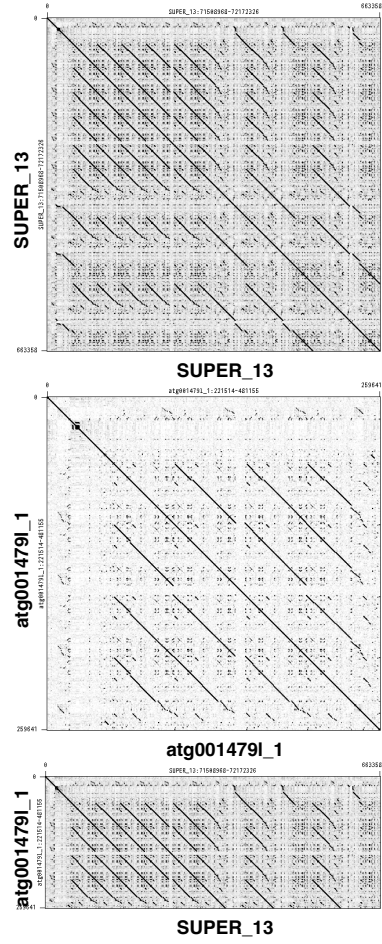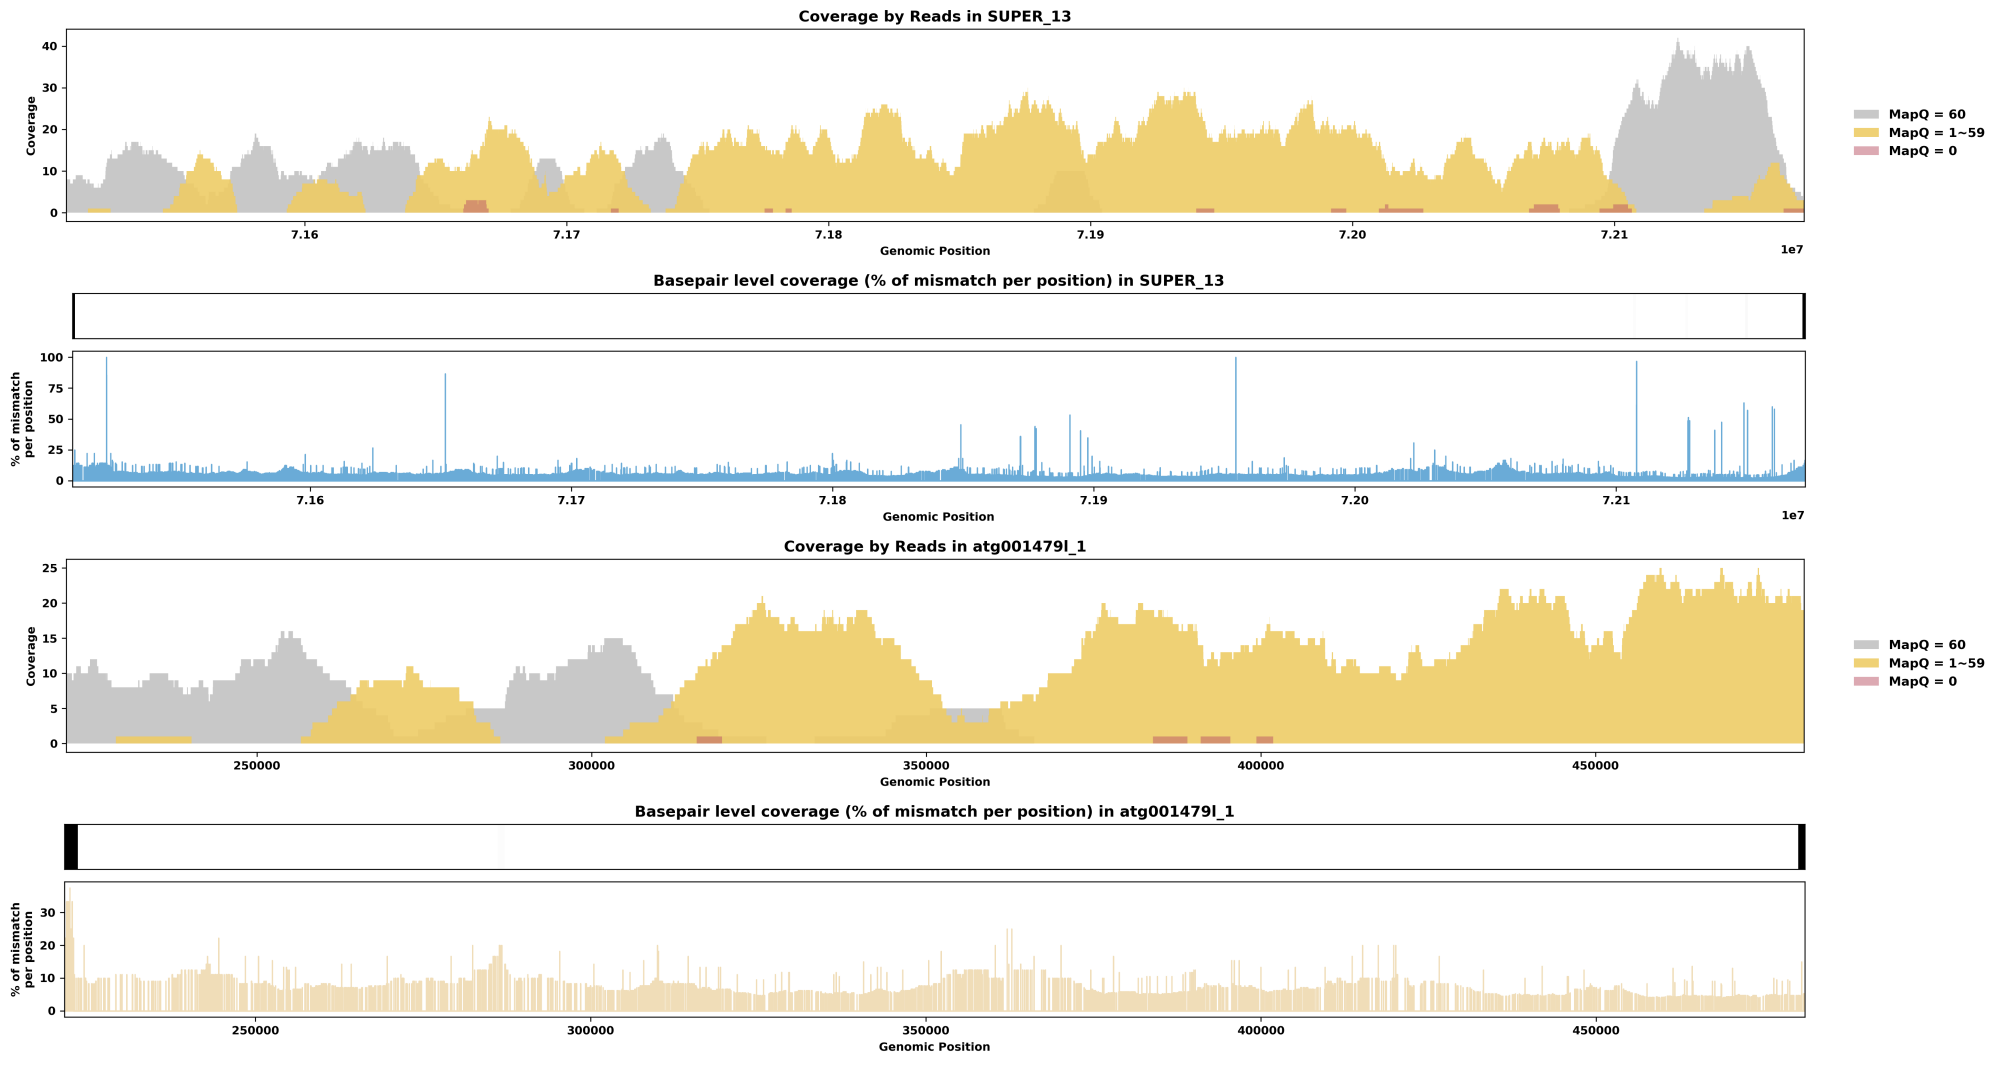

Species ID: mChiNiv1

Common Name: European snow vole

Scientific Name: Chionomys nivalis

Assembly Type: Not Haplotype Resolved

Data Source: VGP

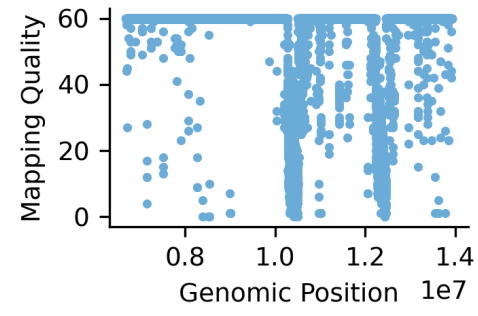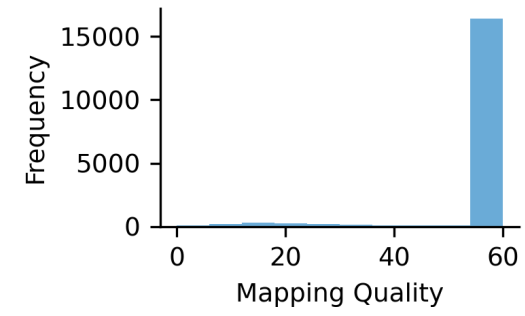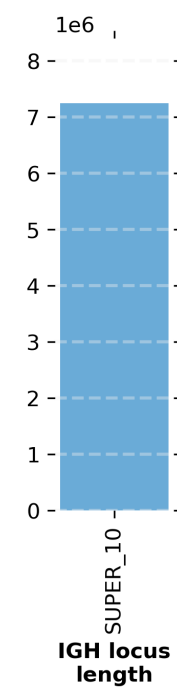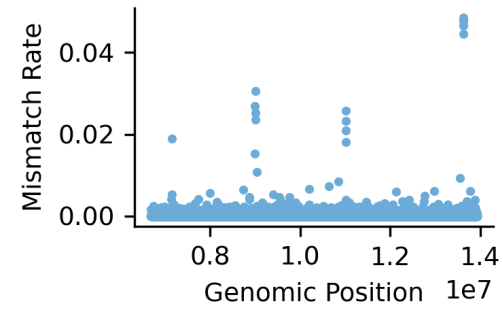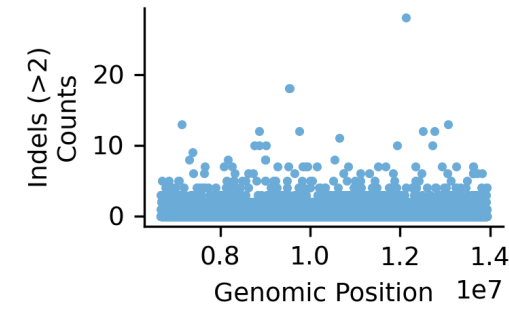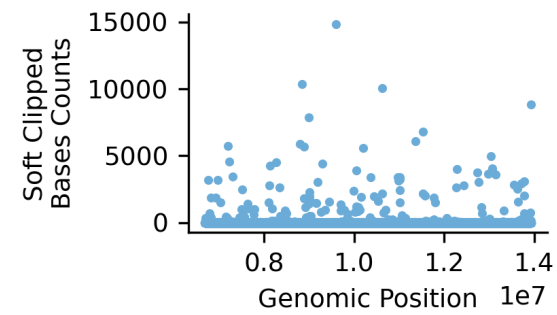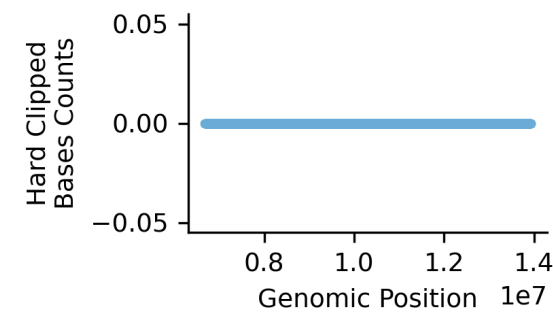

● SUPER\_10

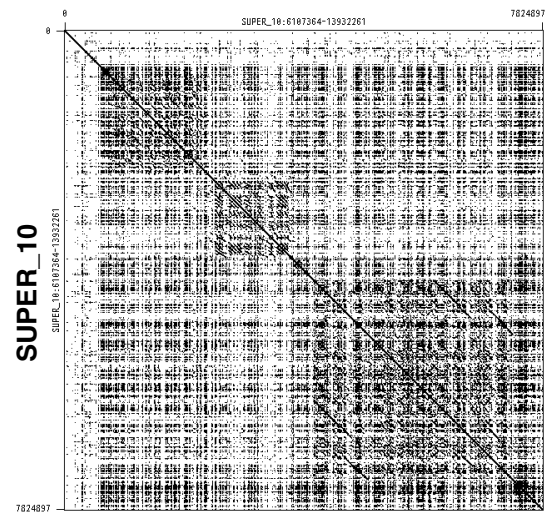

SUPER\_10

Coverage by Reads in SUPER\_10

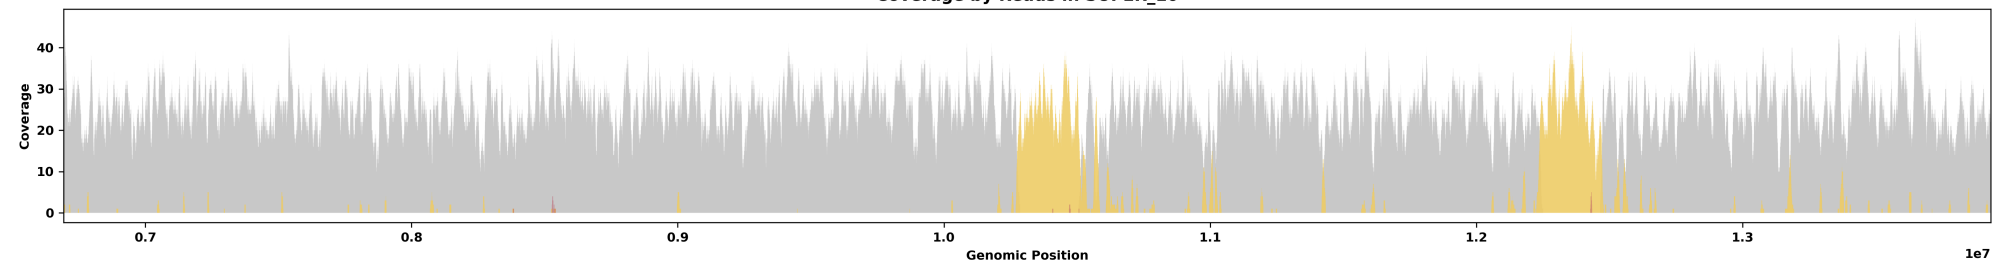

Basepair level coverage (% of mismatch per position) in SUPER\_10

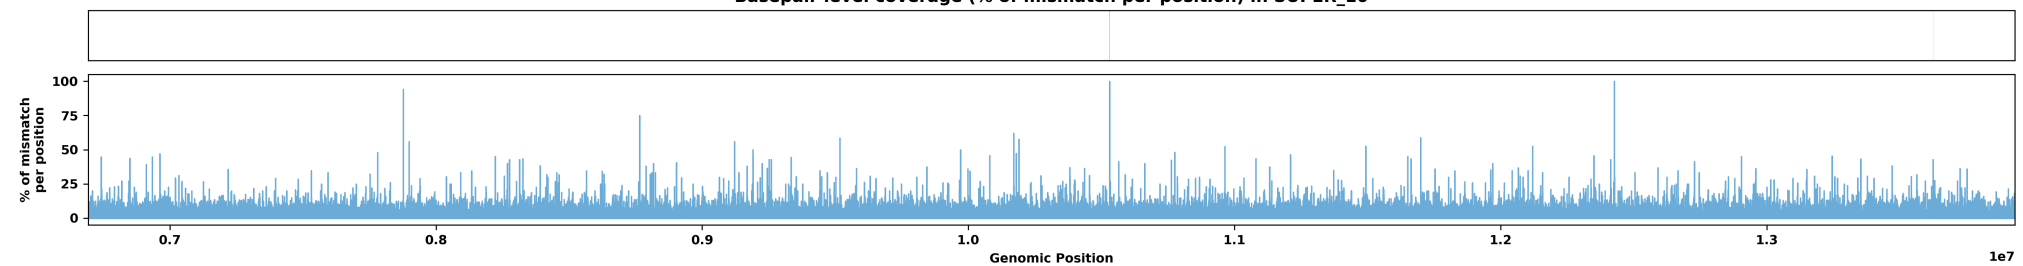

Species ID: mCorTow1  
 Common Name: Townsend's Big-eared Bat  
 Scientific Name: *Corynorhinus townsendi*  
 Assembly Type: Haplotype Resolved  
 Data Source: CCGP

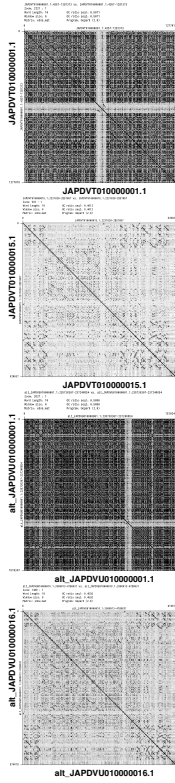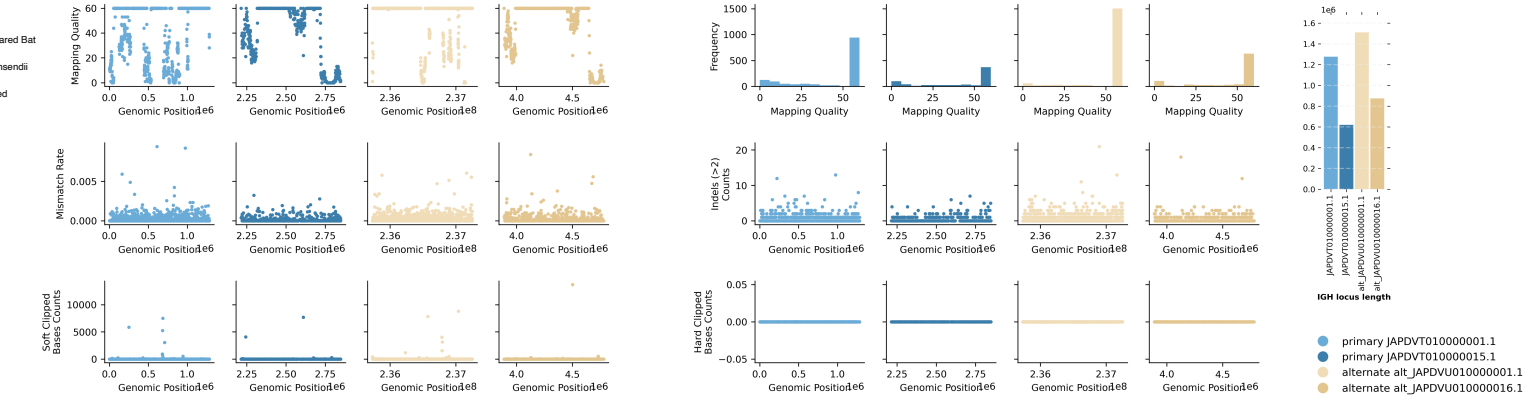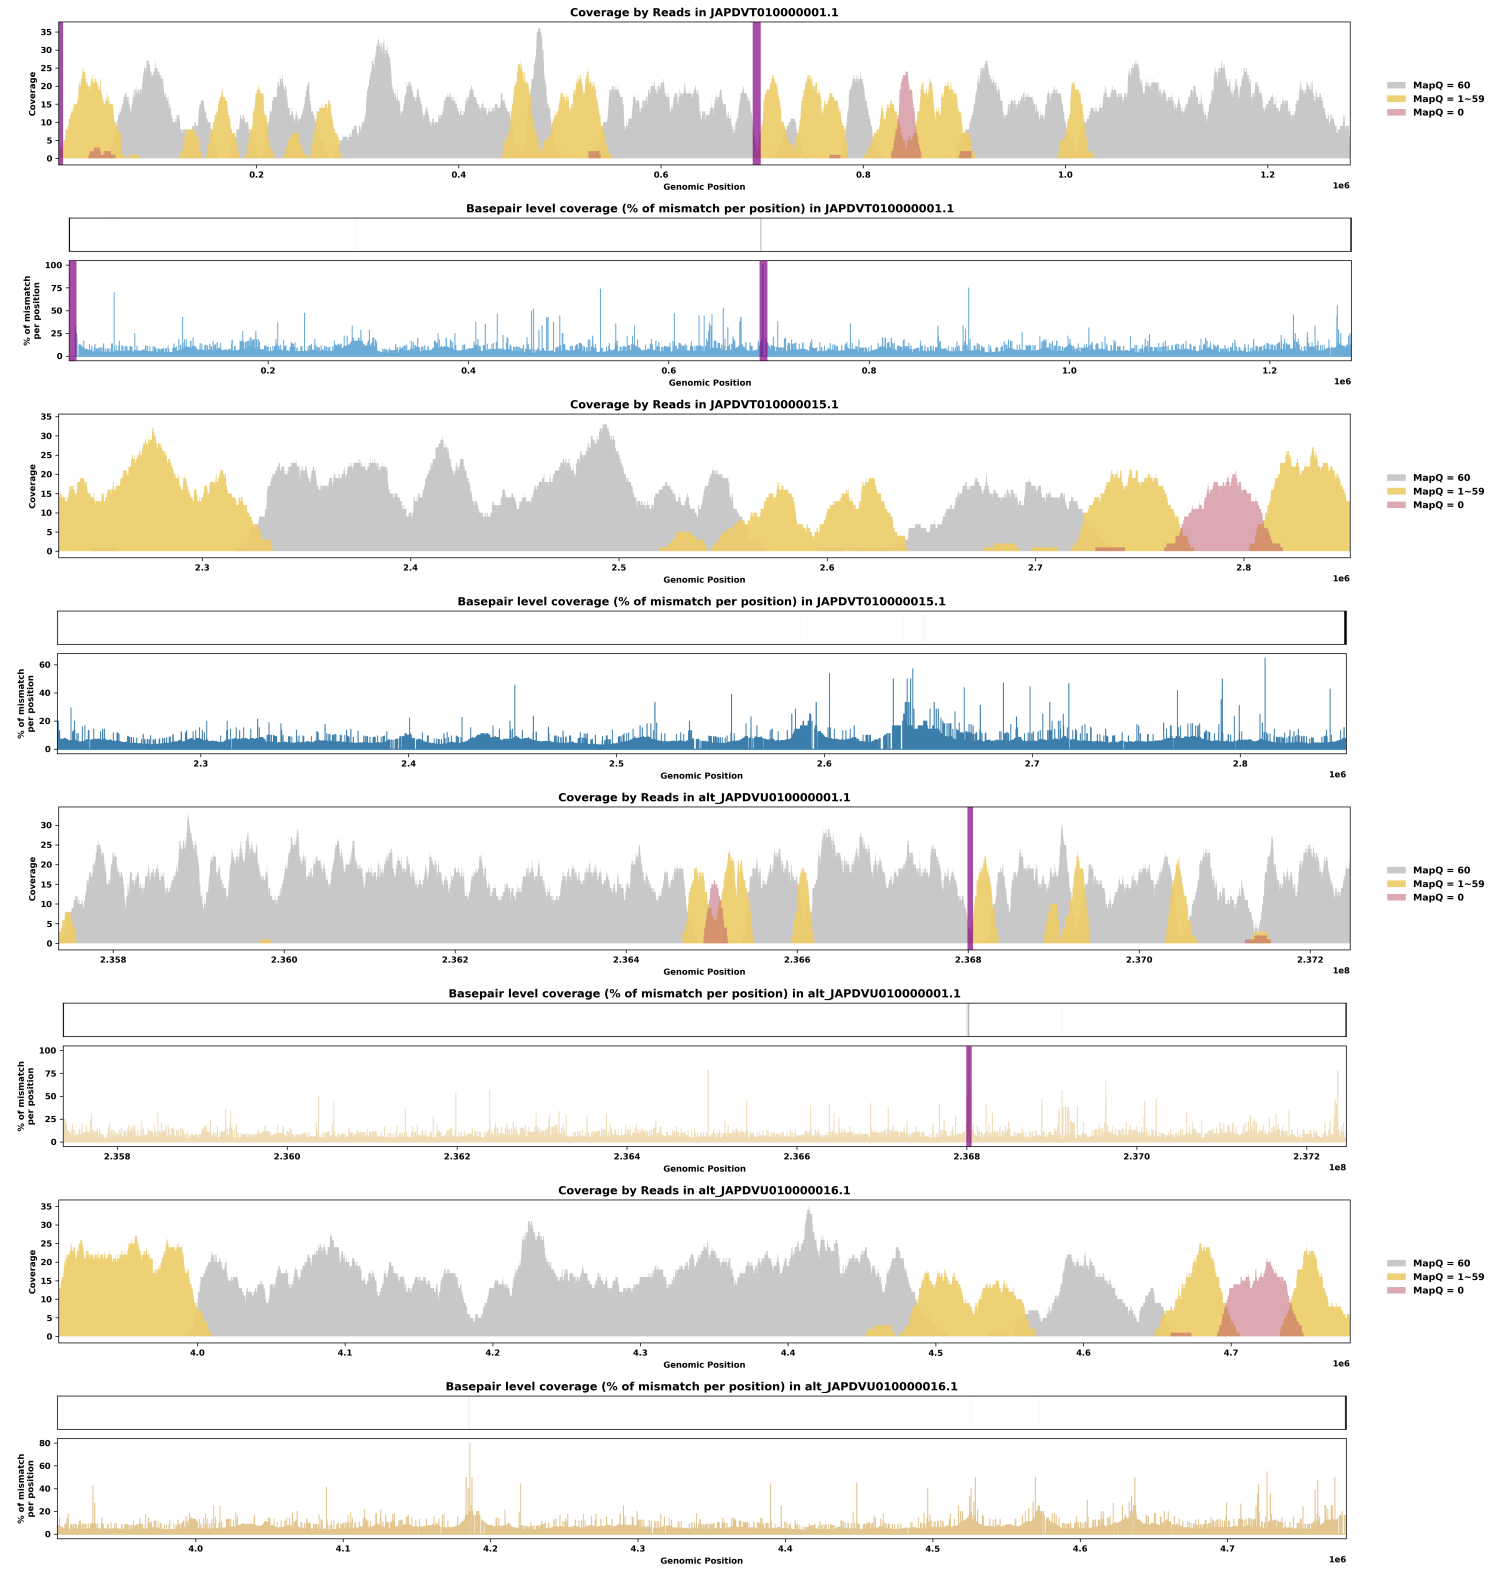

Species ID: mDasNov1  
 Common Name: nine-banded armadillo  
 Scientific Name: Dasypus novemcinctus  
 Assembly Type: Haplotype Resolved  
 Data Source: VGP

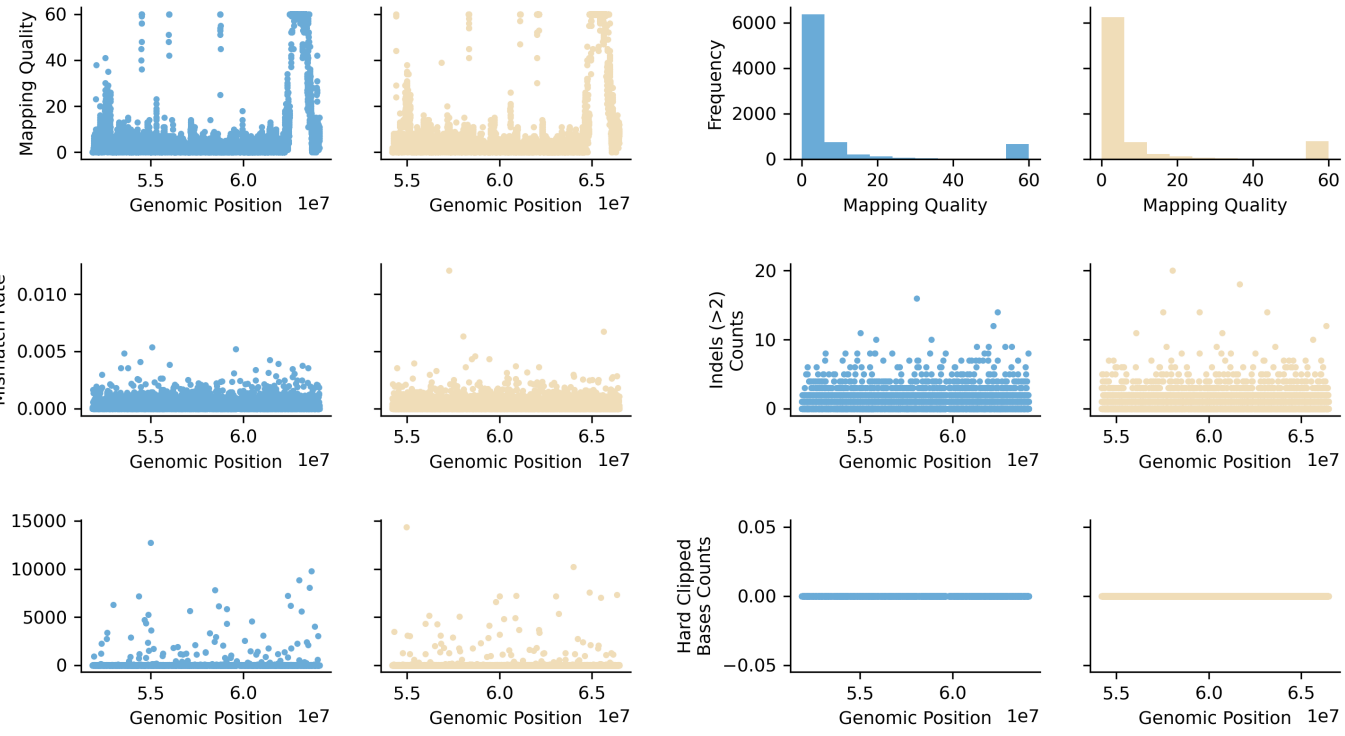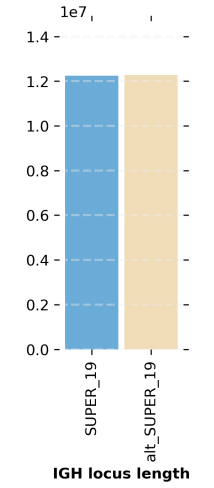

● SUPER\_19  
 ● alt\_SUPER\_19

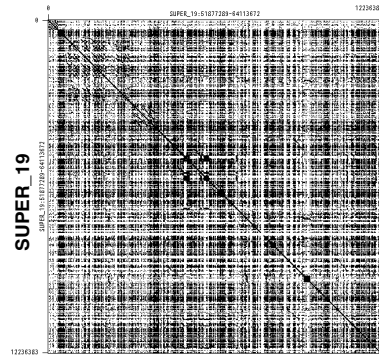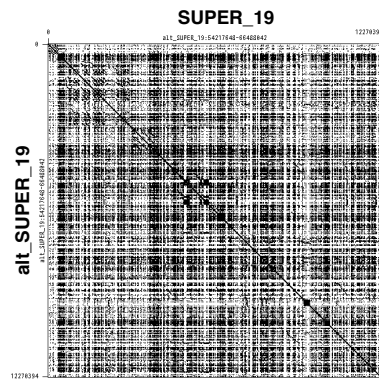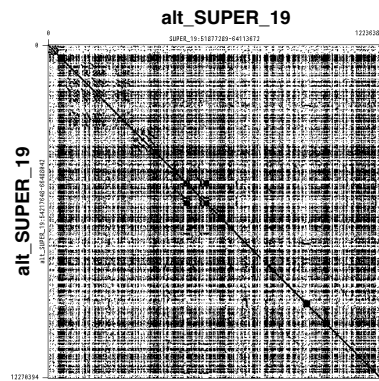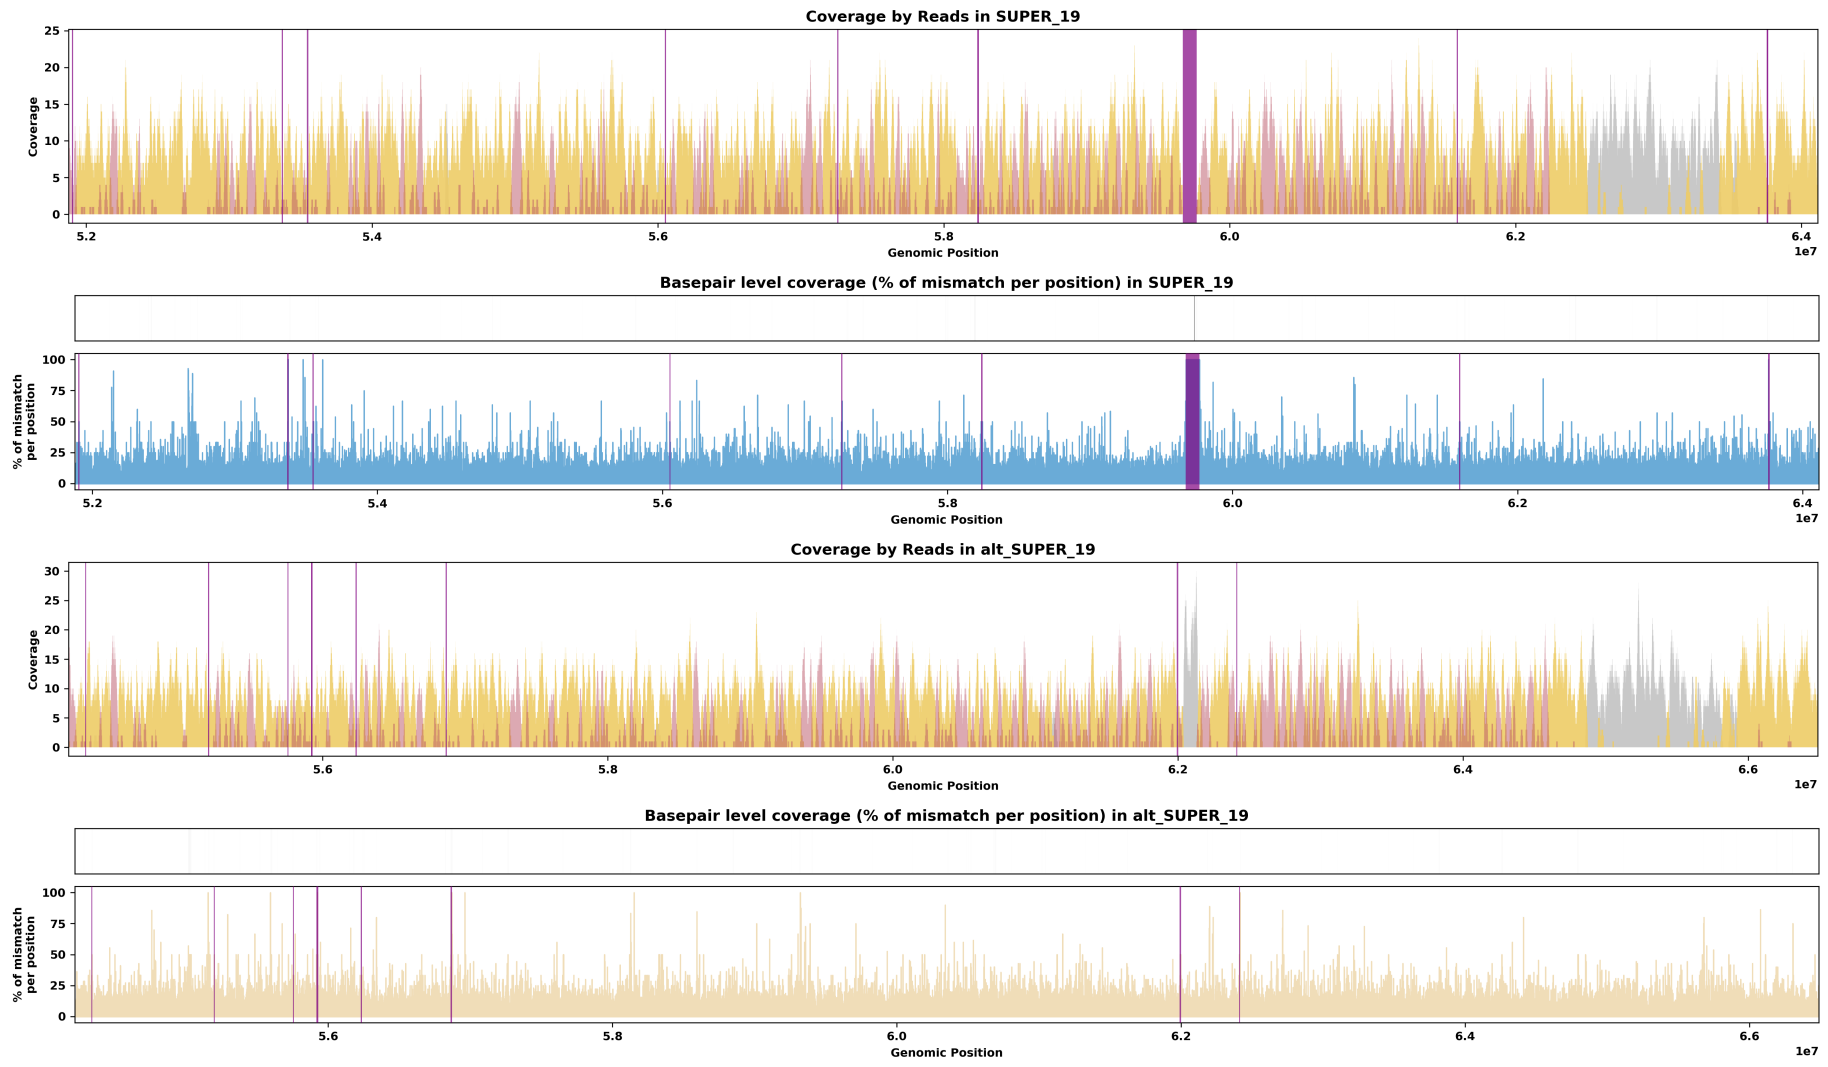

■ MapQ = 60  
 ■ MapQ = 1-59  
 ■ MapQ = 0

■ MapQ = 60  
 ■ MapQ = 1-59  
 ■ MapQ = 0



Species ID: mDelDel1  
 Common Name: saddleback dolphin  
 Scientific Name: Delphinus delphis  
 Assembly Type: Not Haplotype Resolved  
 Data Source: VGP

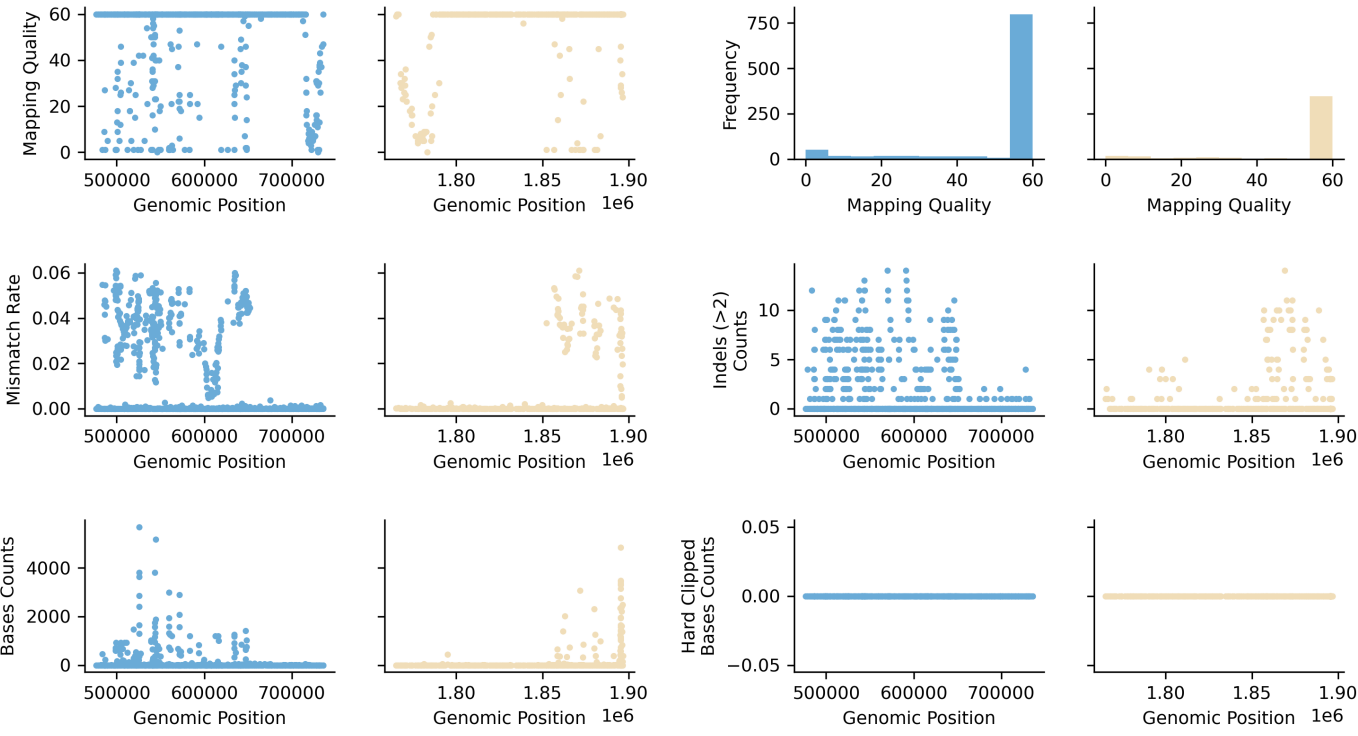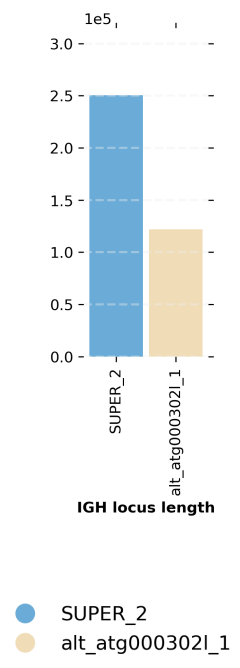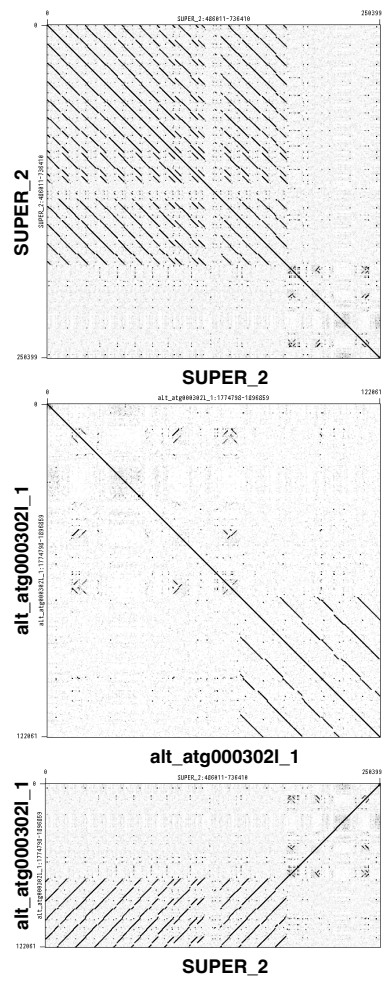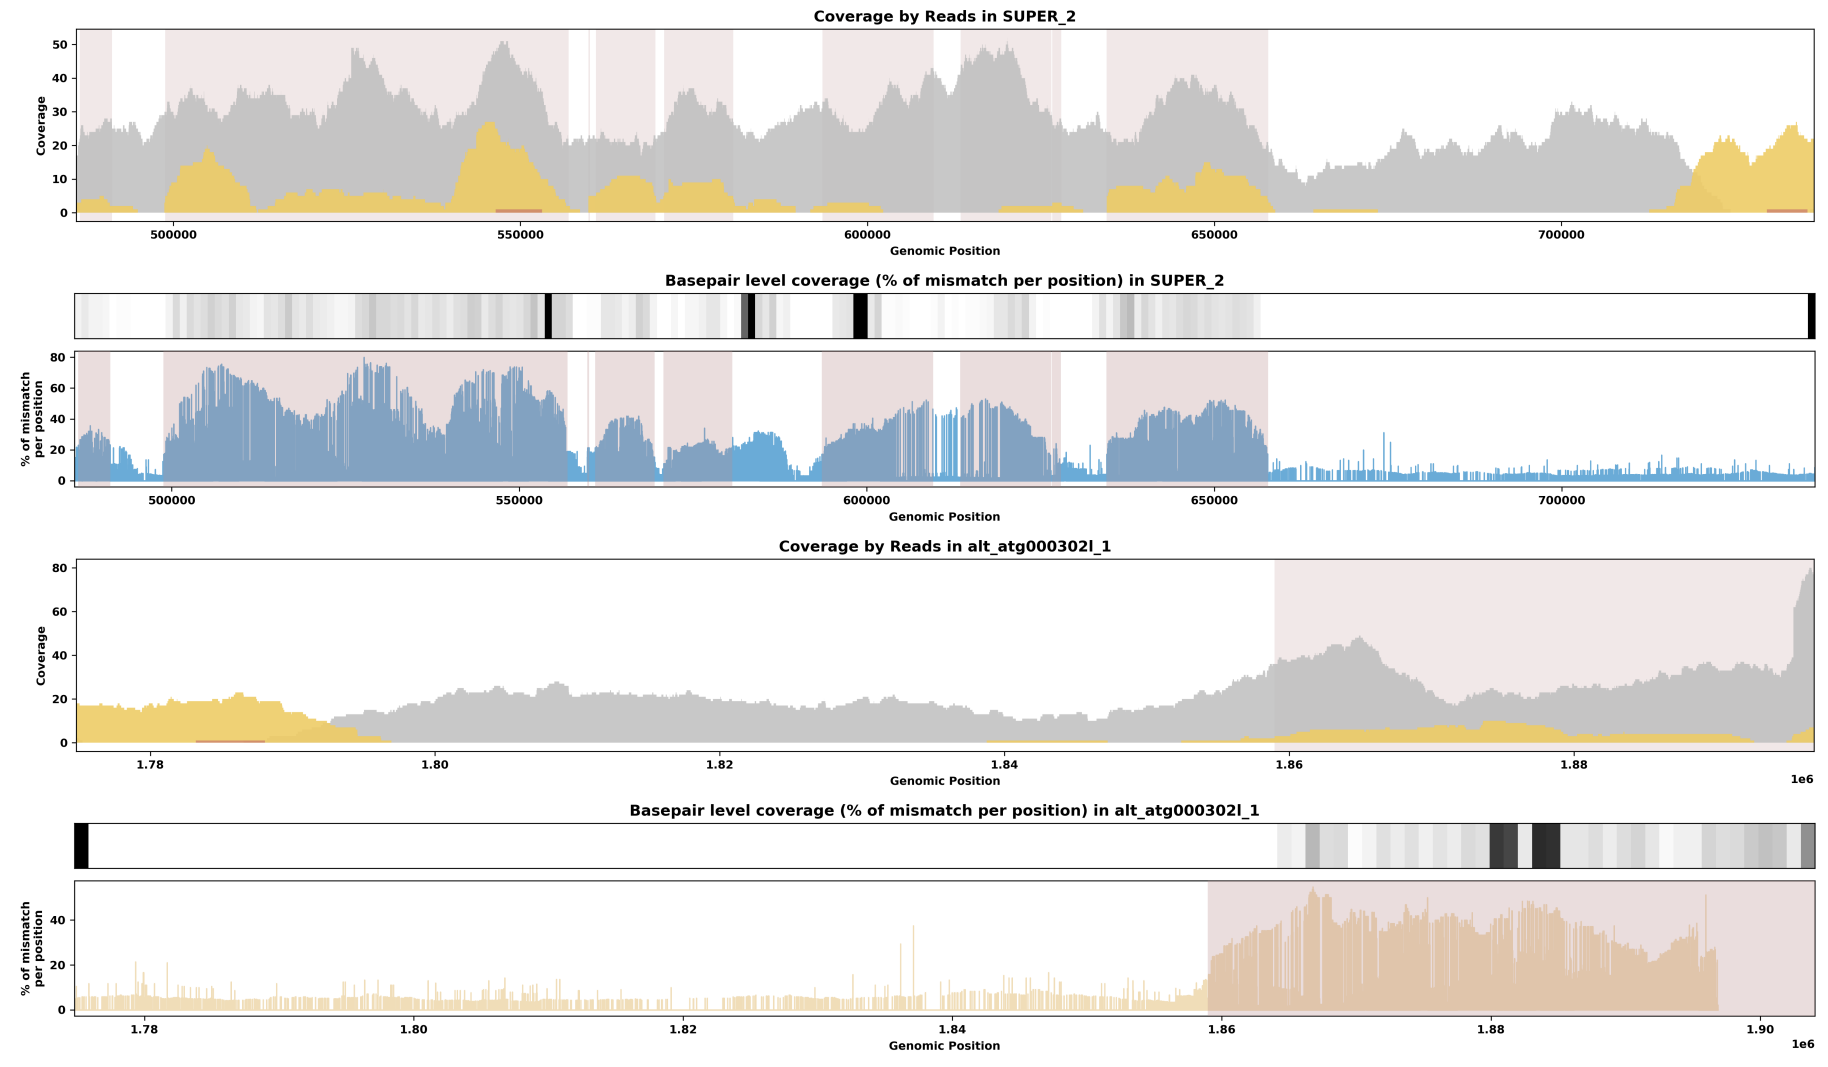

MapQ = 60  
 MapQ = 1-59  
 MapQ = 0

Species ID: mDicBic1

Common Name: black rhinoceros

Scientific Name: Diceros bicornis

Assembly Type: Haplotype Resolved

Data Source: VGP

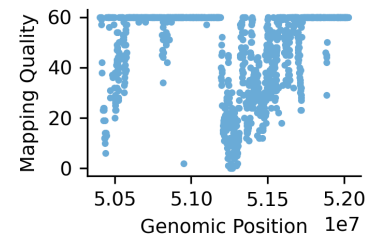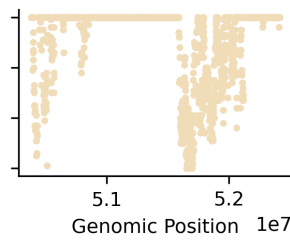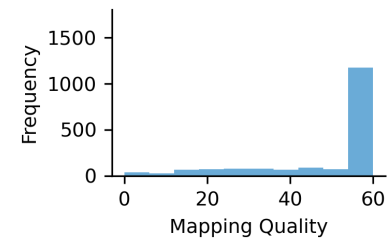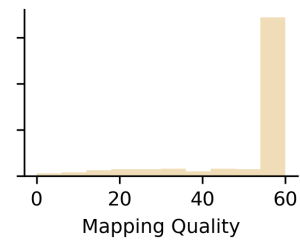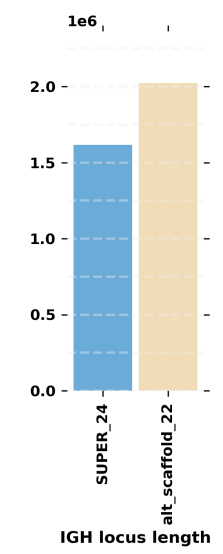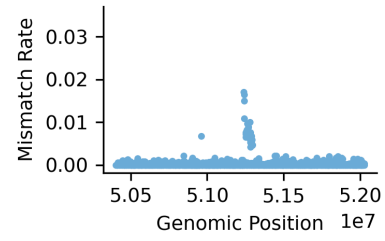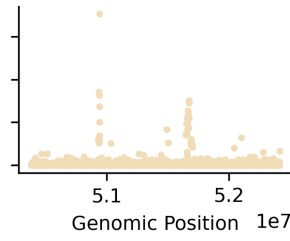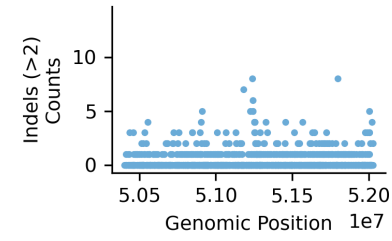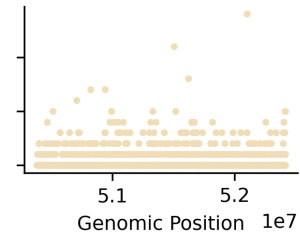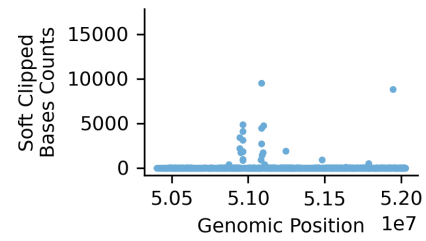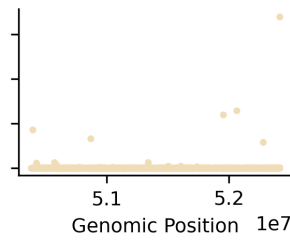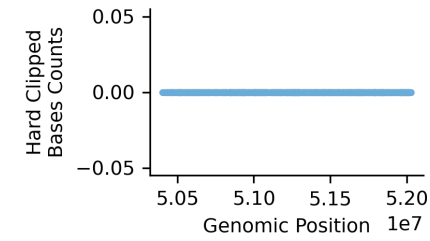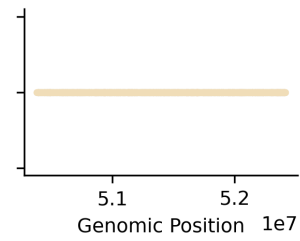

● SUPER\_24  
● alt\_scaffold\_22

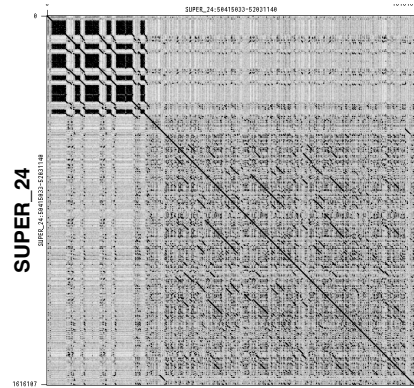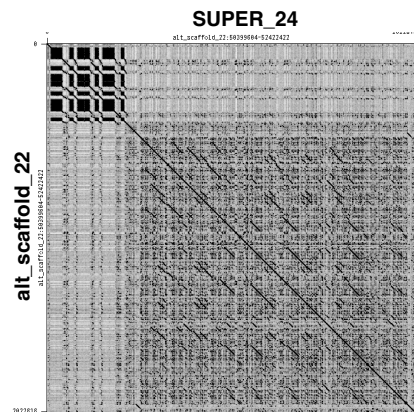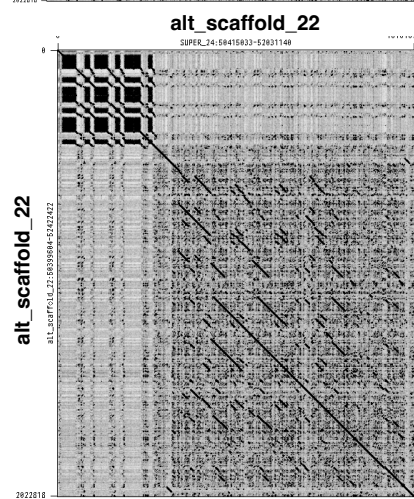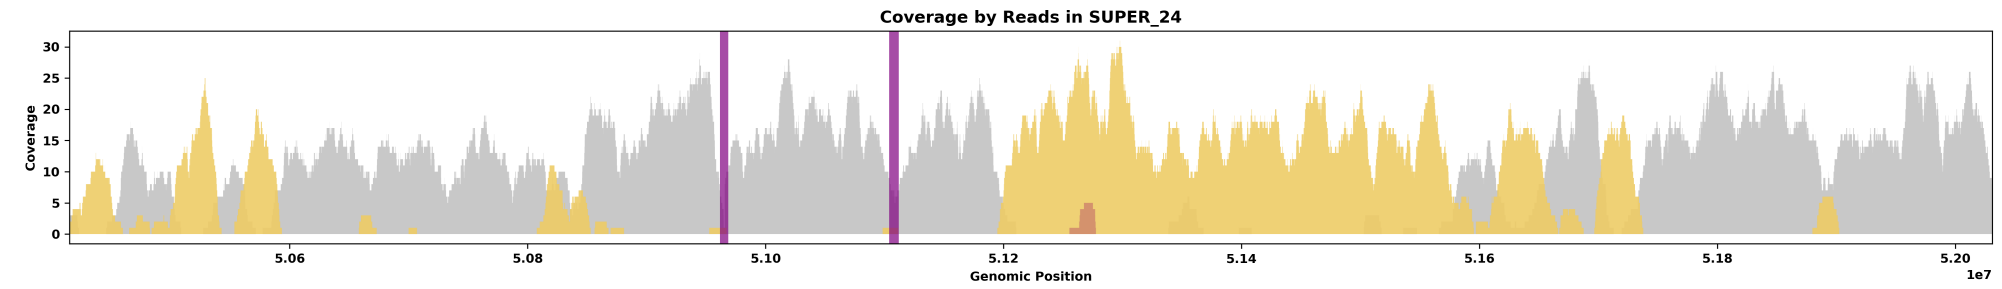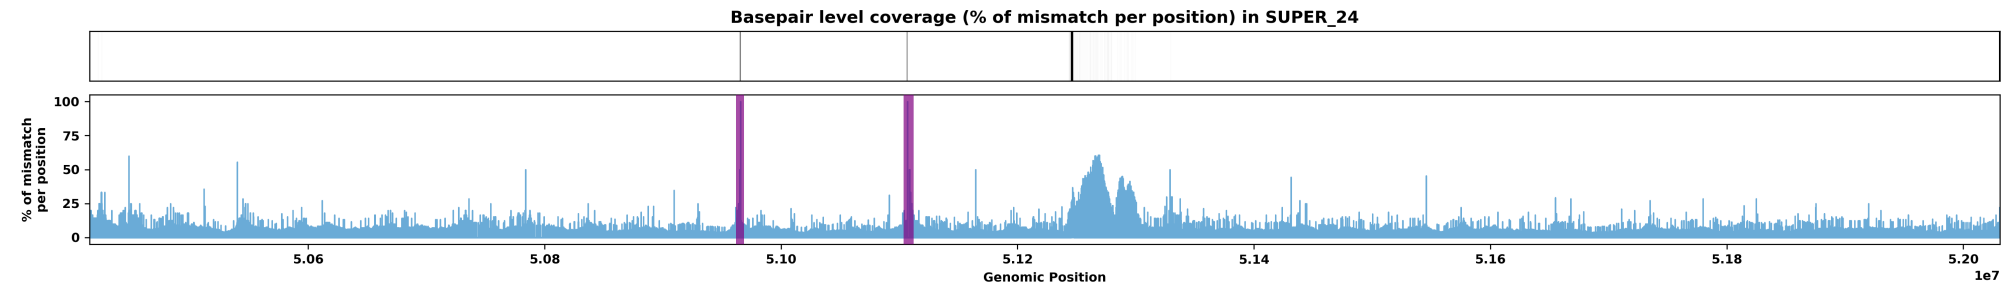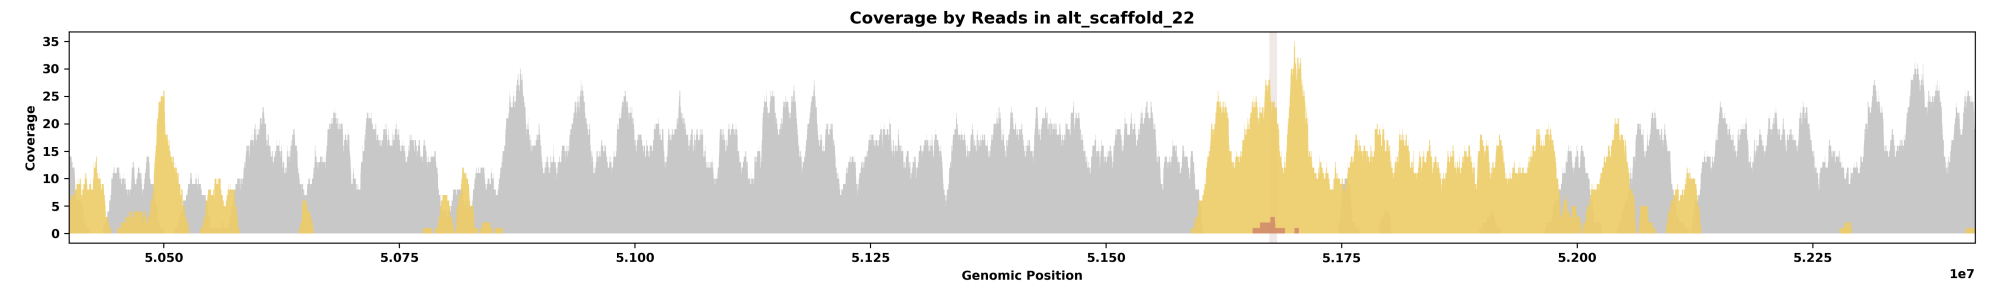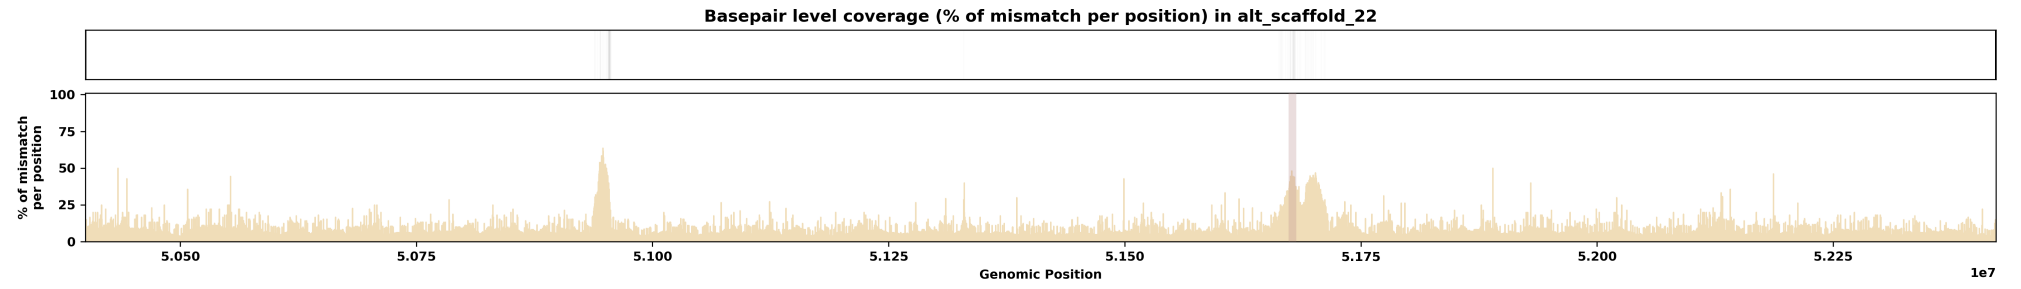

Species ID: mDipMer1  
 Common Name: Merriam Kangaroo Rat  
 Scientific Name: Dipodomys merriami  
 Assembly Type: Not Haplotype Resolved  
 Data Source: CCGP

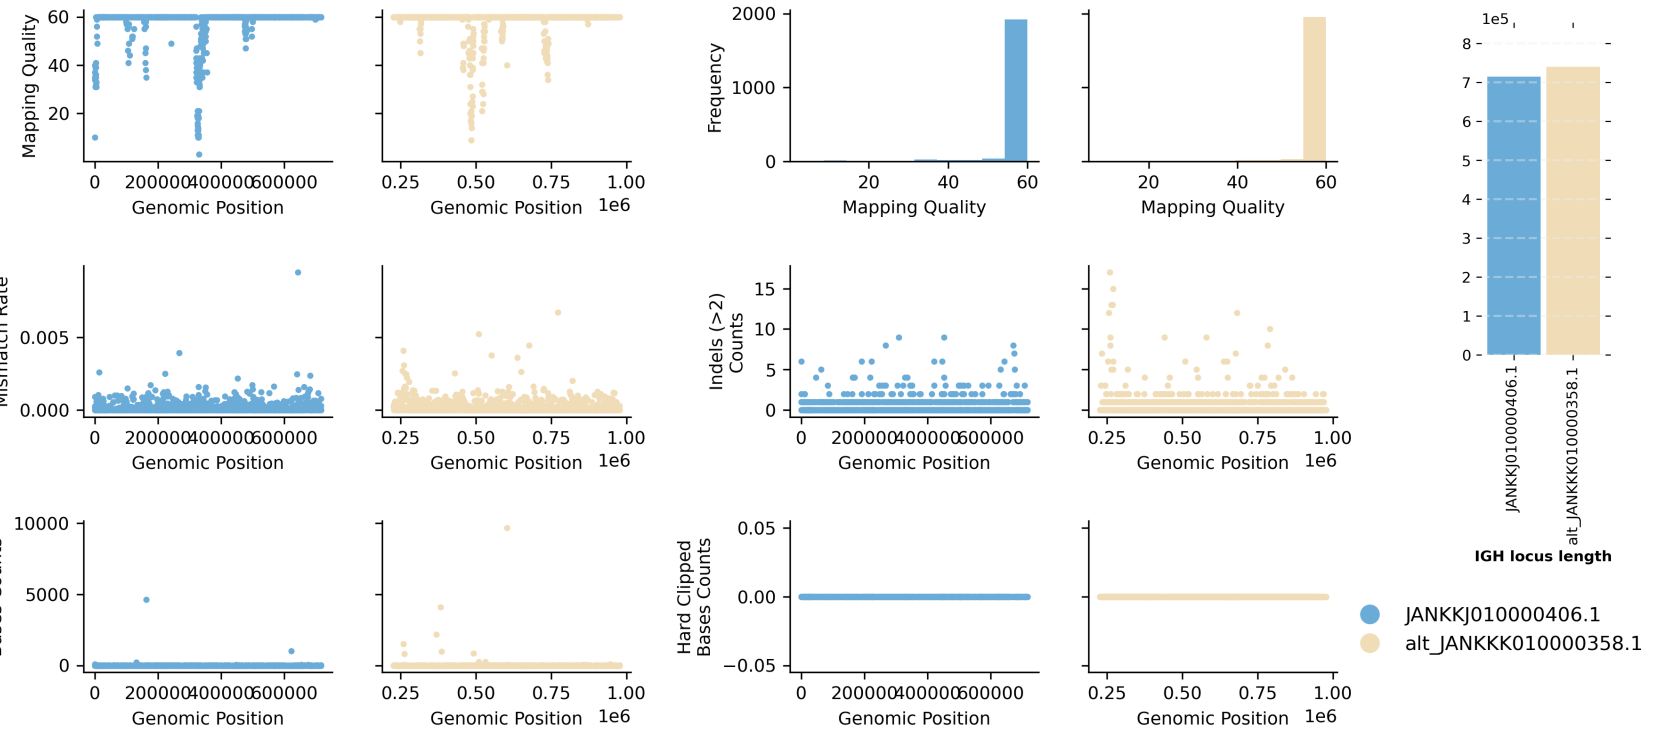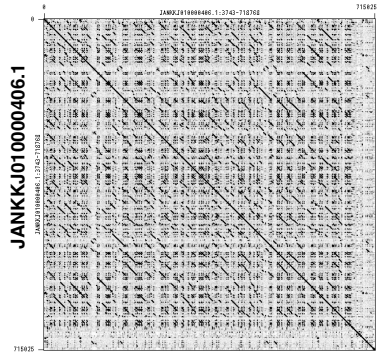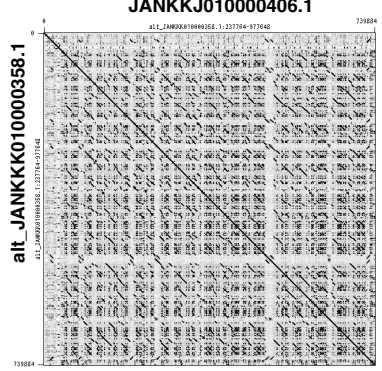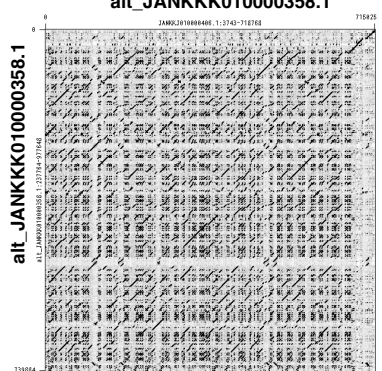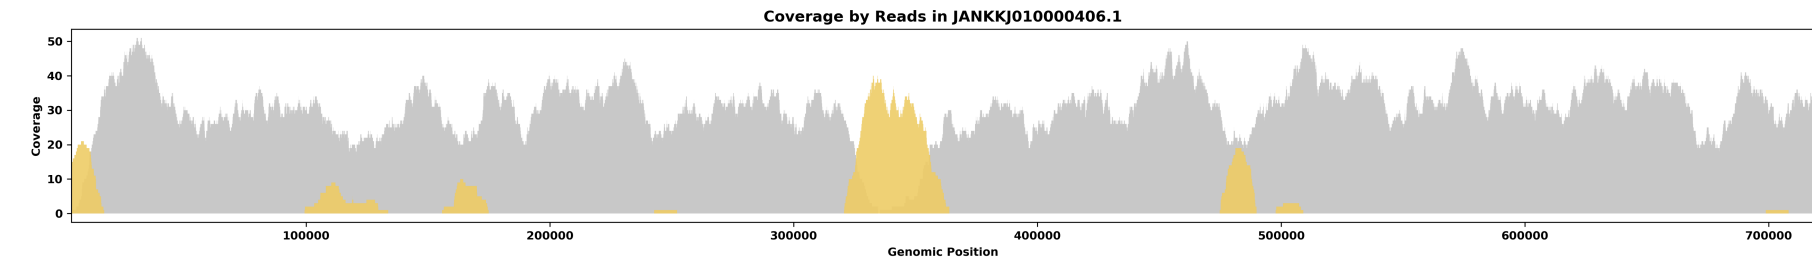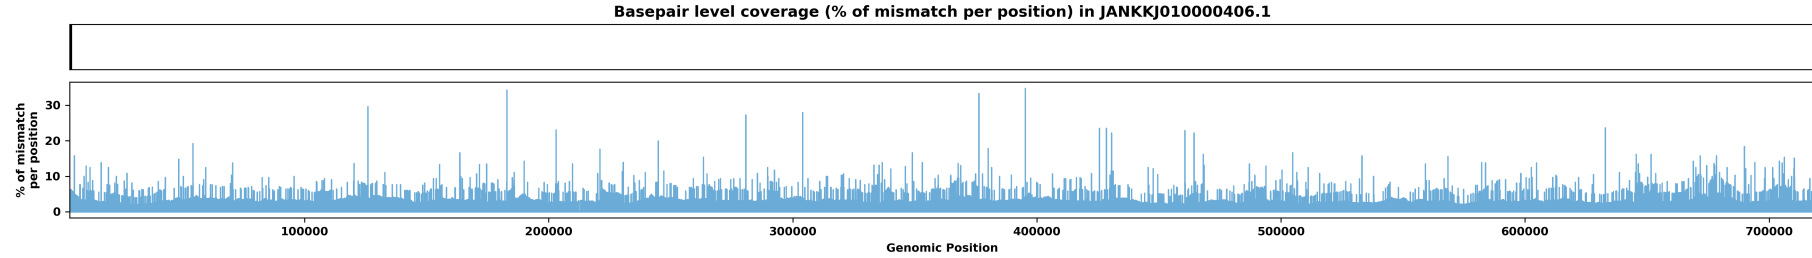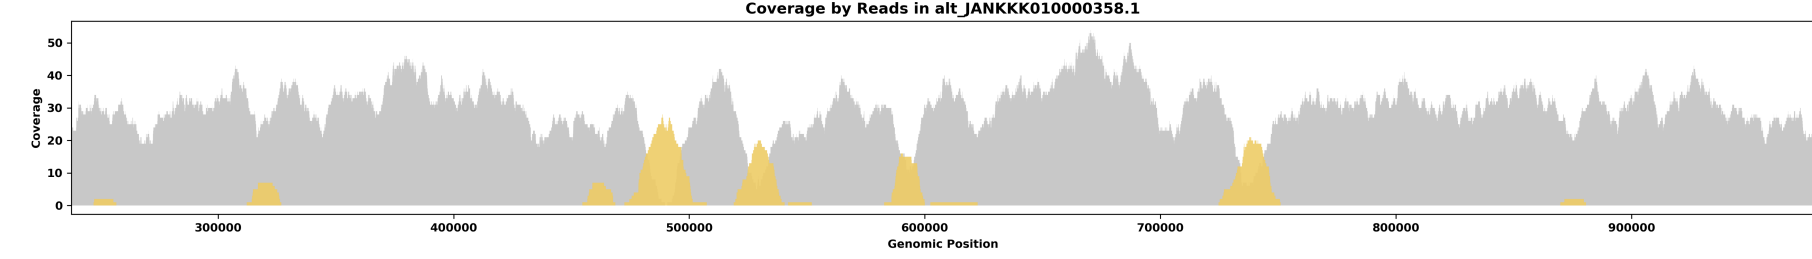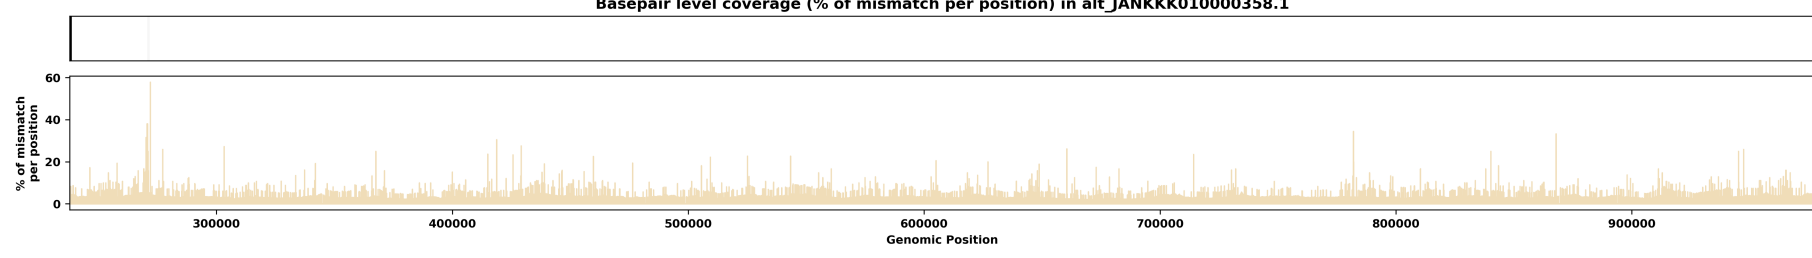

MapQ = 60  
 MapQ = 1-59  
 MapQ = 0

Species ID: mEleMax1  
 Common Name: Asiatic Elephant  
 Scientific Name: *Elephas maximus*  
 Assembly Type: Not Haplotype Resolved  
 Data Source: VGP

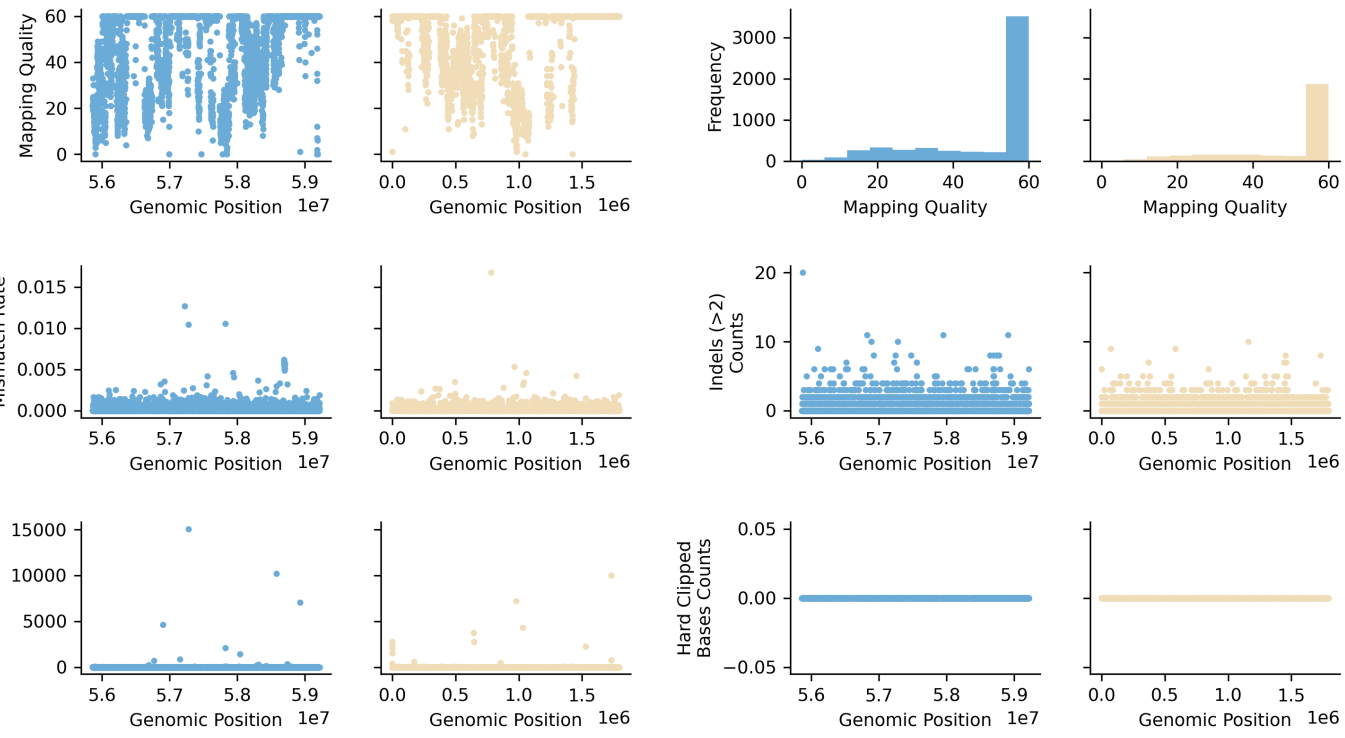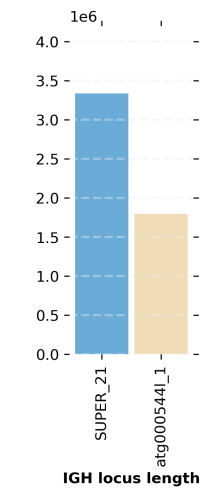

● SUPER\_21  
 ● atg000544l\_1

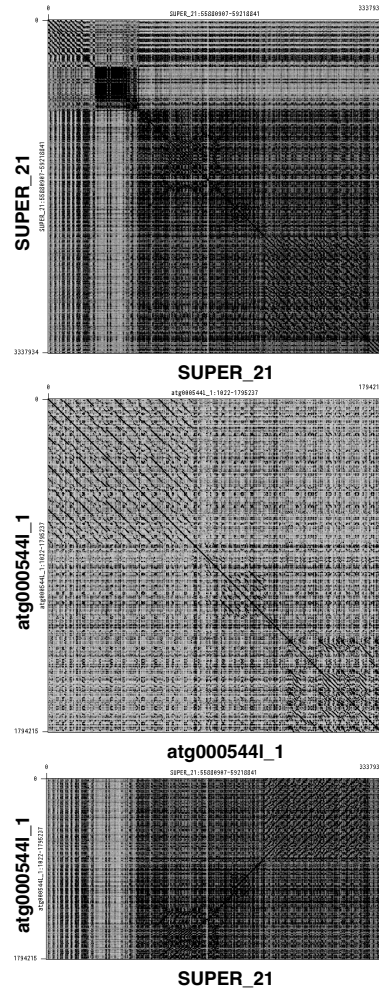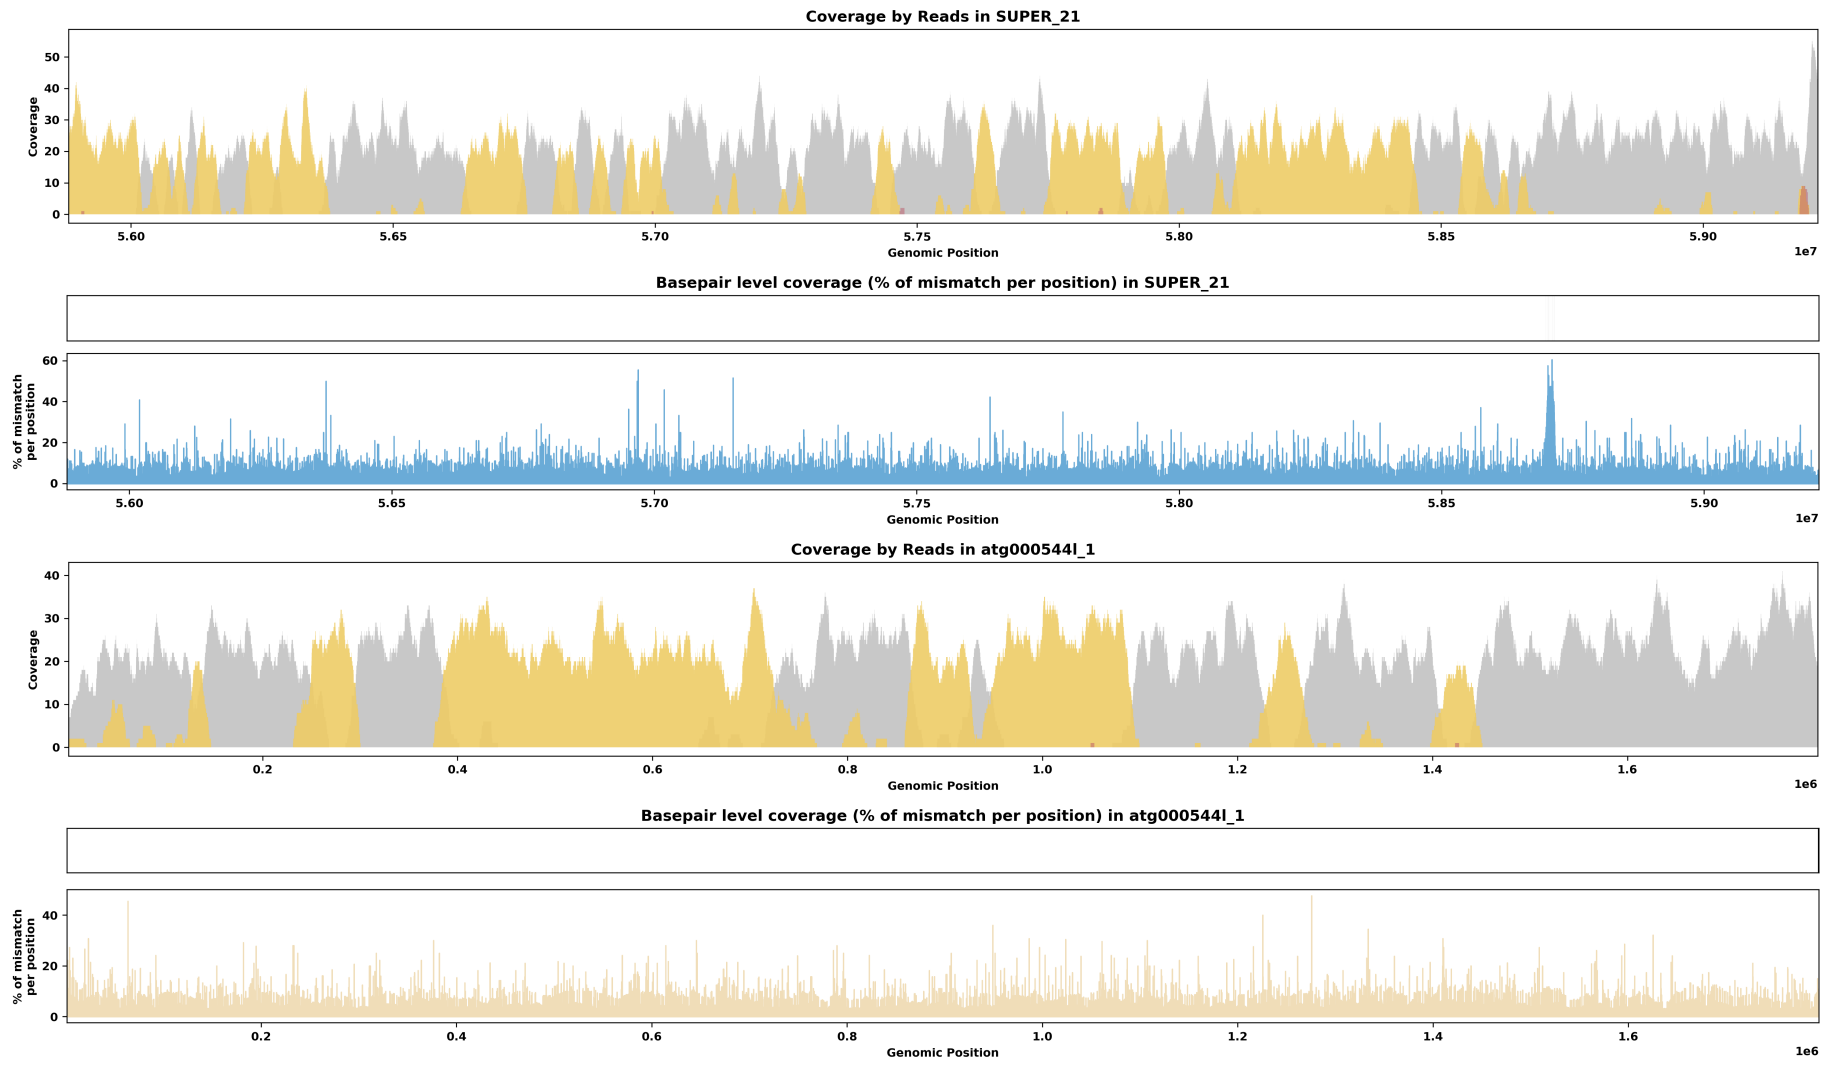

Species ID: mEptNil1  
 Common Name: northern bat  
 Scientific Name: *Eptesicus nilssonii*  
 Assembly Type: Not Haplotype Resolved  
 Data Source: VGP

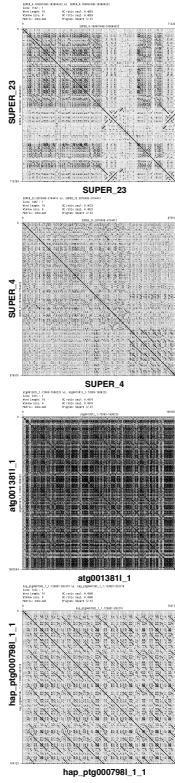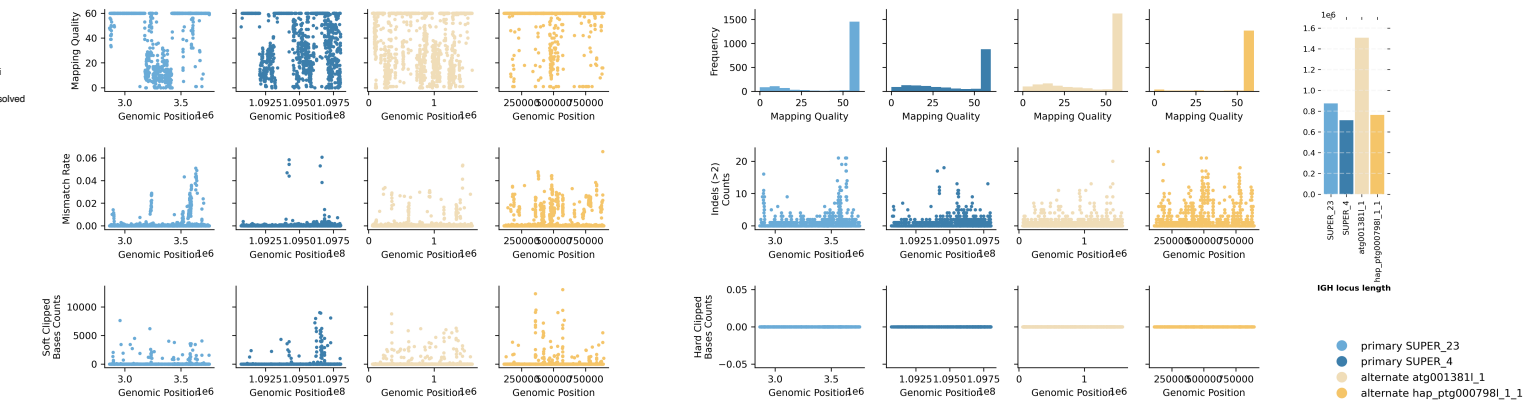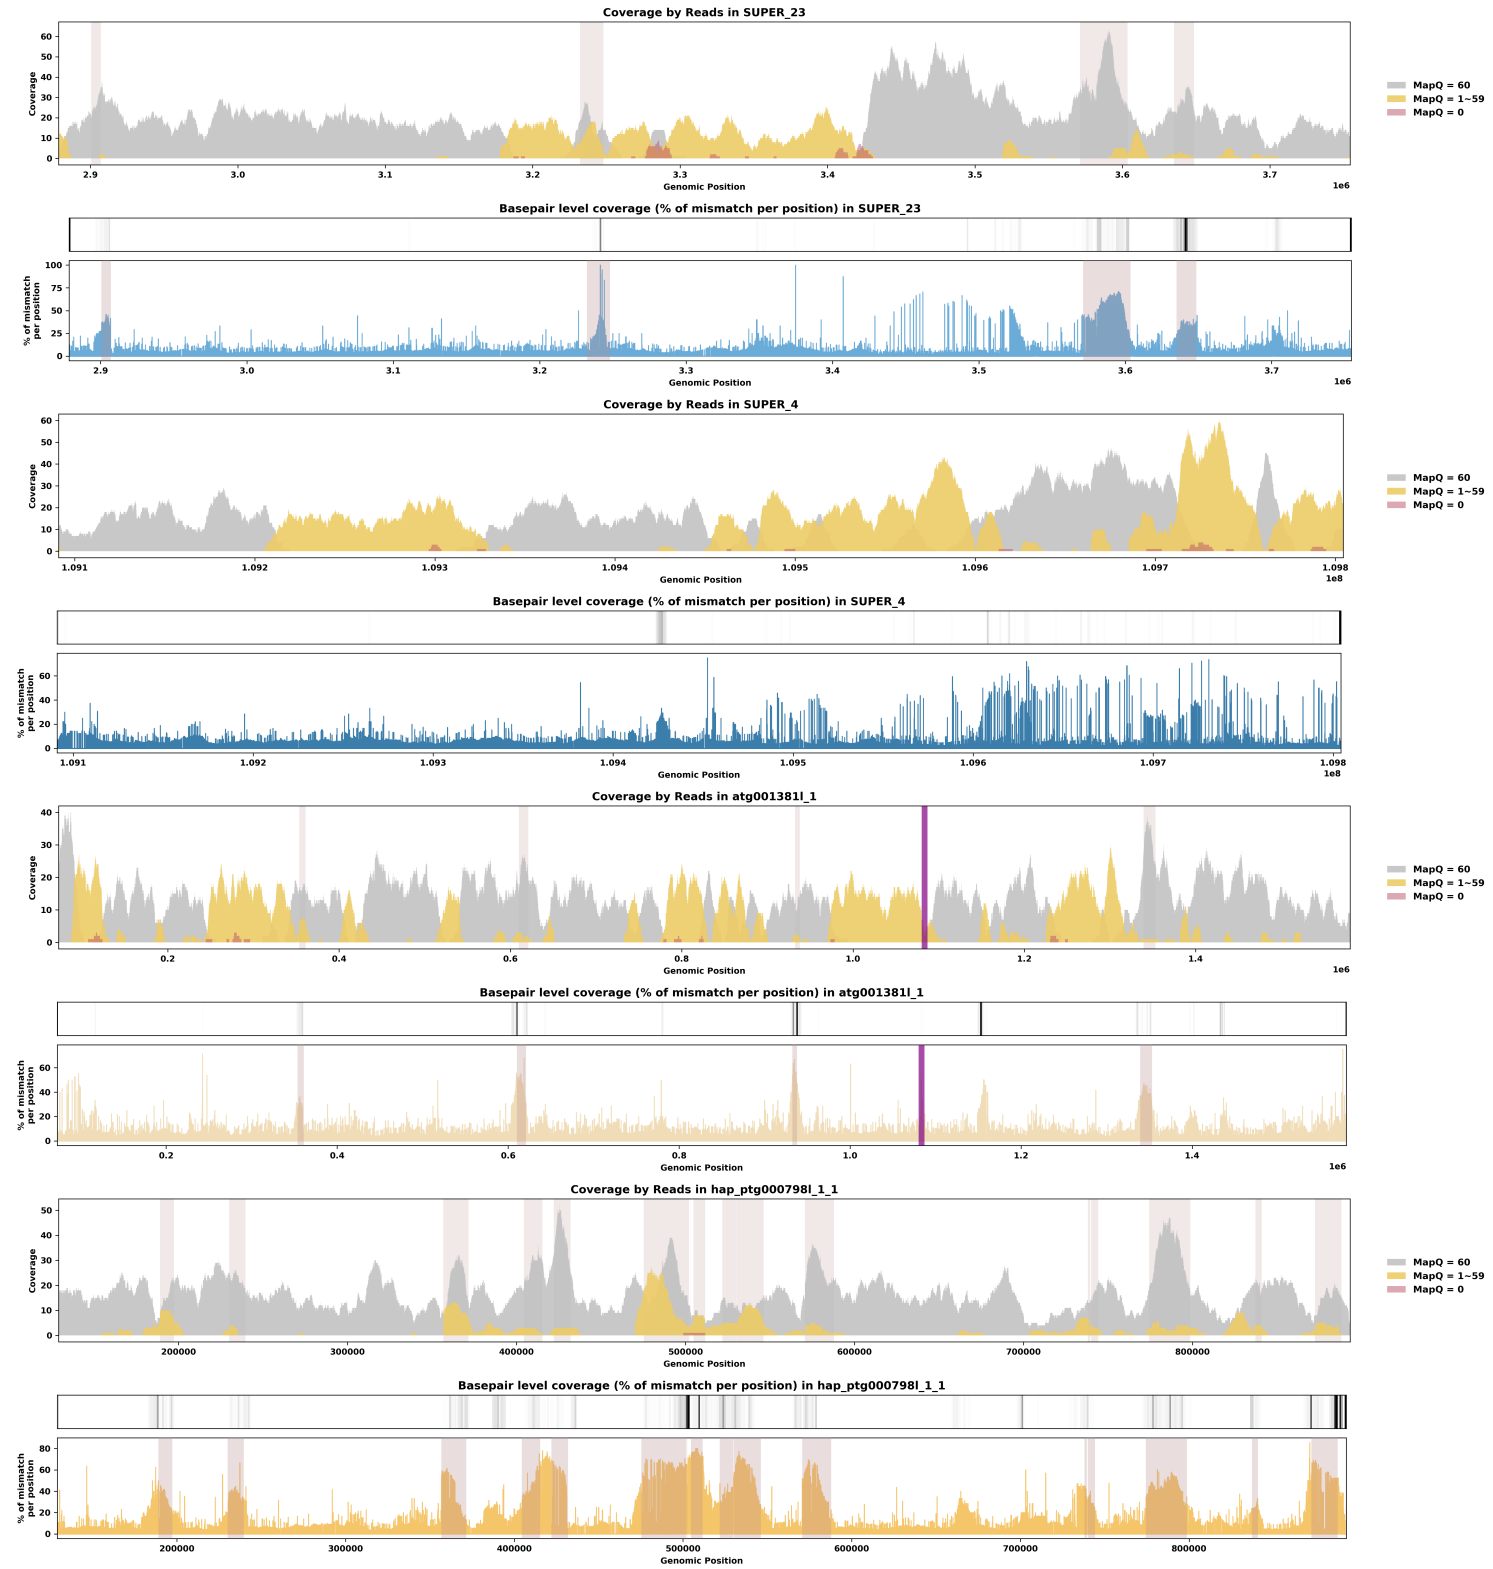

Species ID: mEriEur2

Common Name: western European hedgehog

Scientific Name: Erinaceus europaeus

Assembly Type: Not Haplotype Resolved

Data Source: VGP

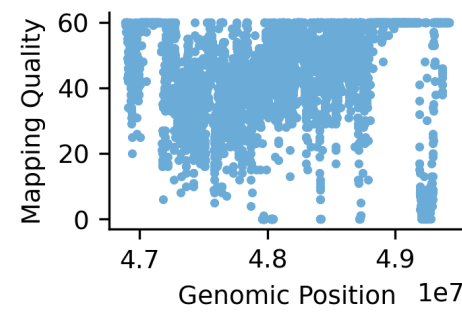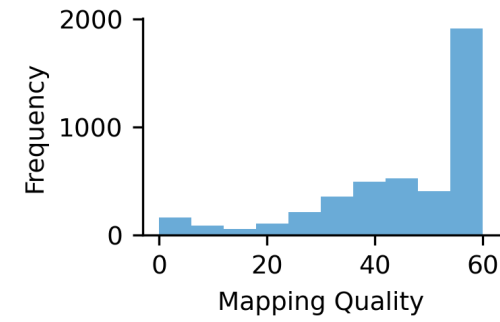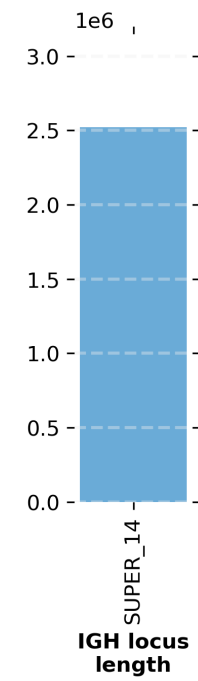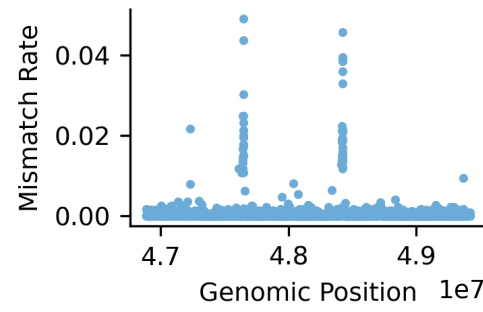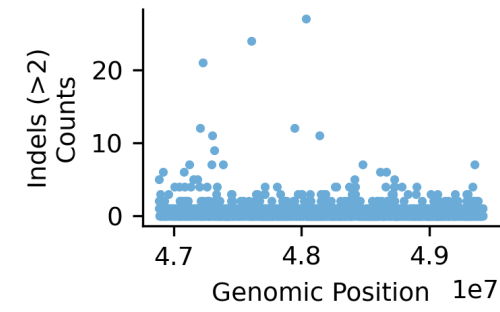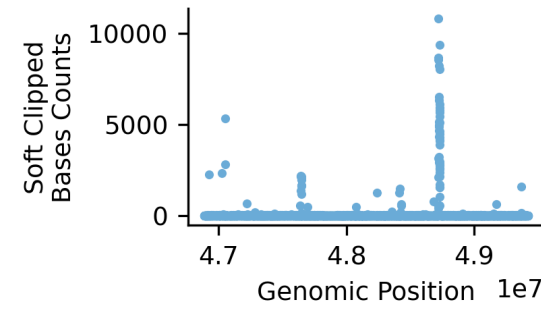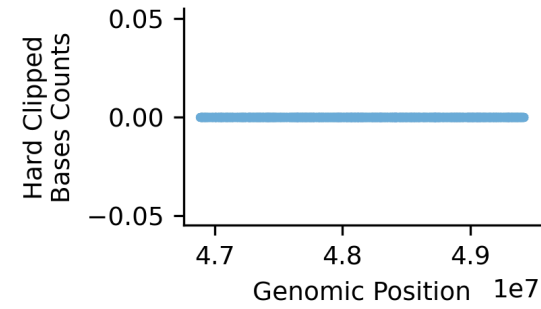

● SUPER\_14

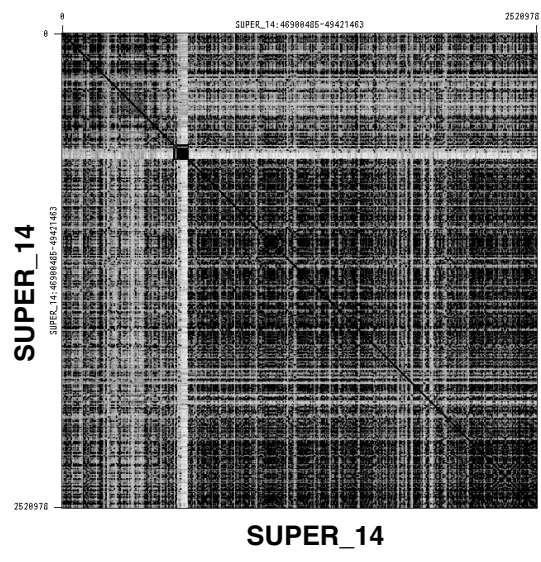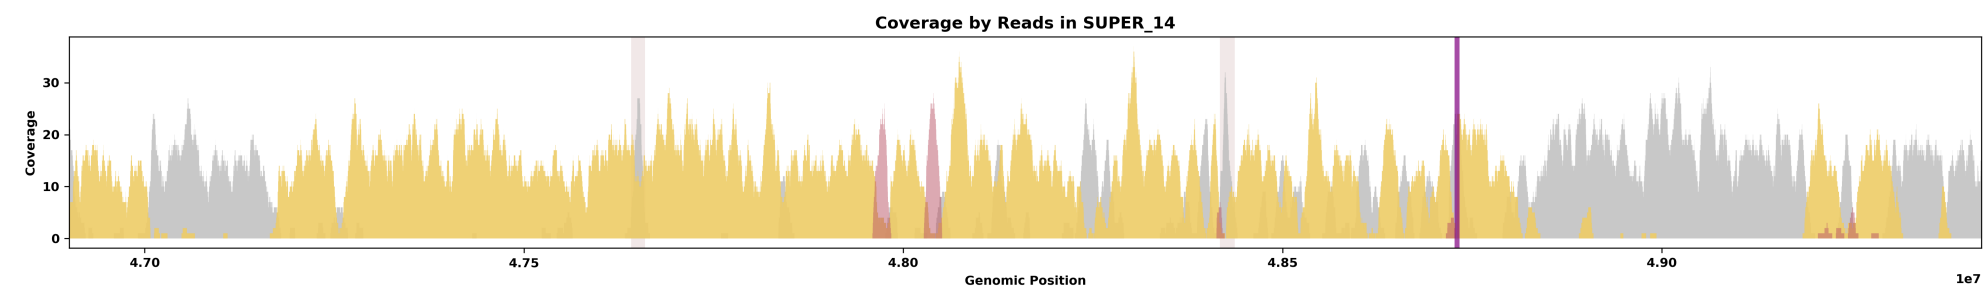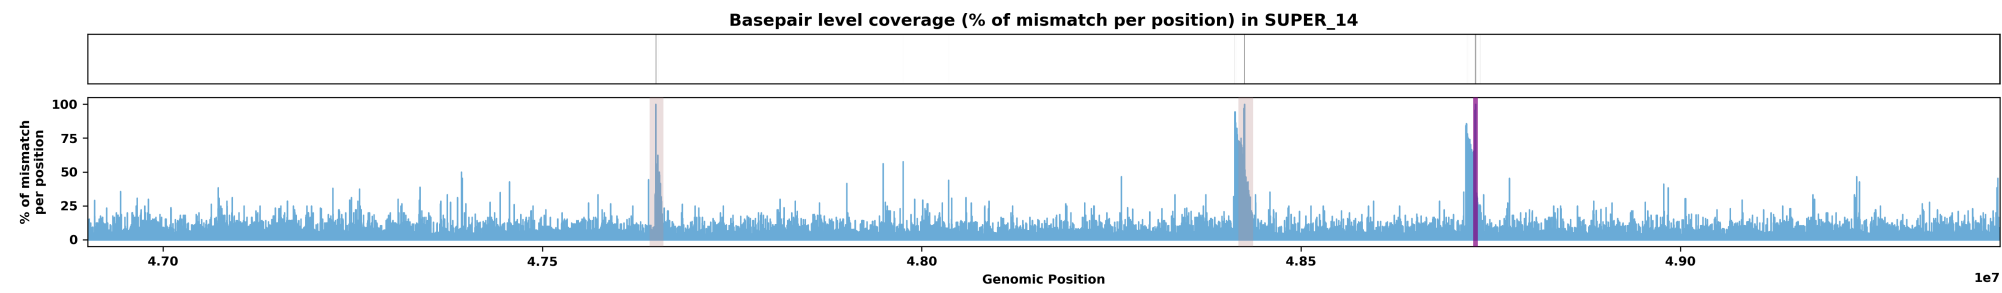

Species ID: mEscRob2  
 Common Name: grey whale  
 Scientific Name: *Eschrichtius robustus*  
 Assembly Type: Not Haplotype Resolved  
 Data Source: VGP

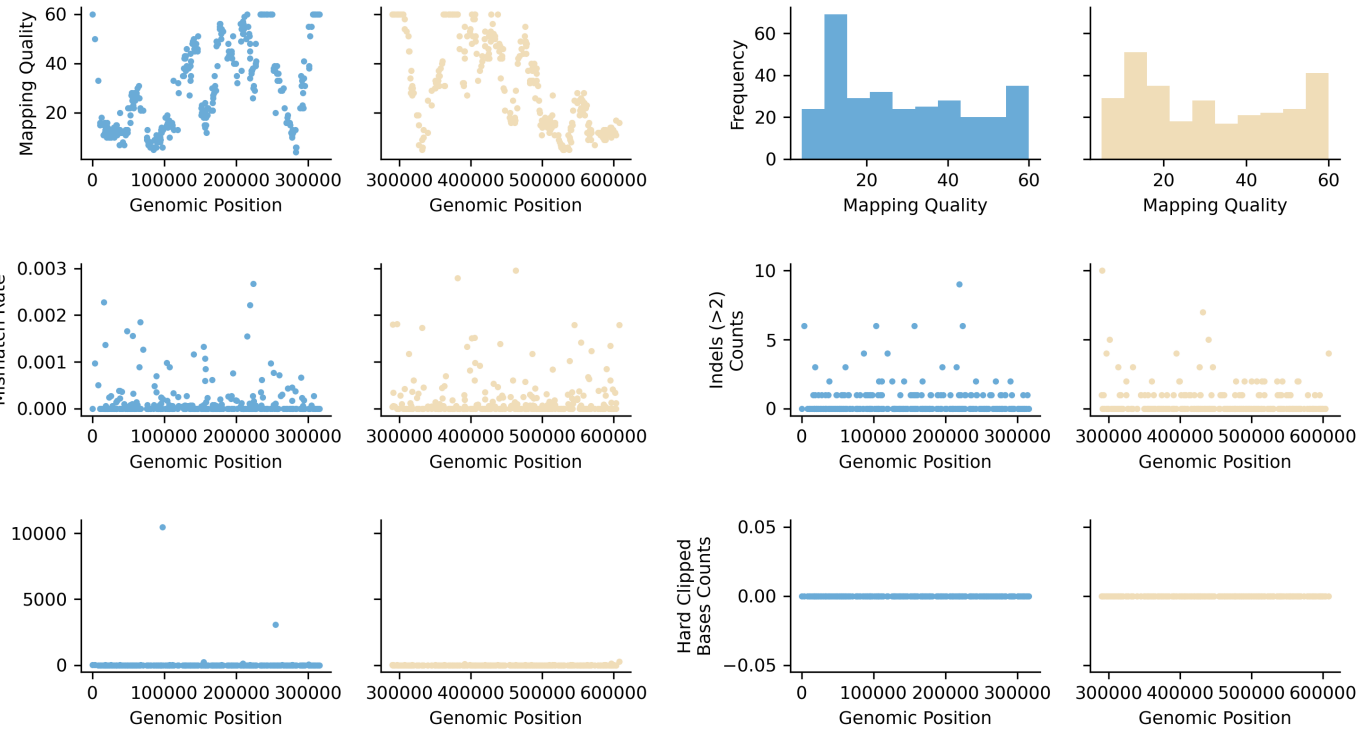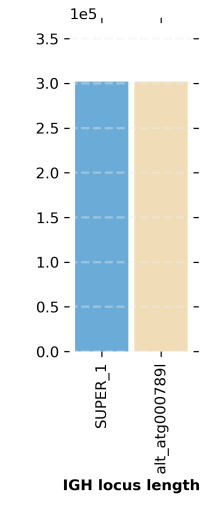

● SUPER\_1  
 ● alt\_atg000789I

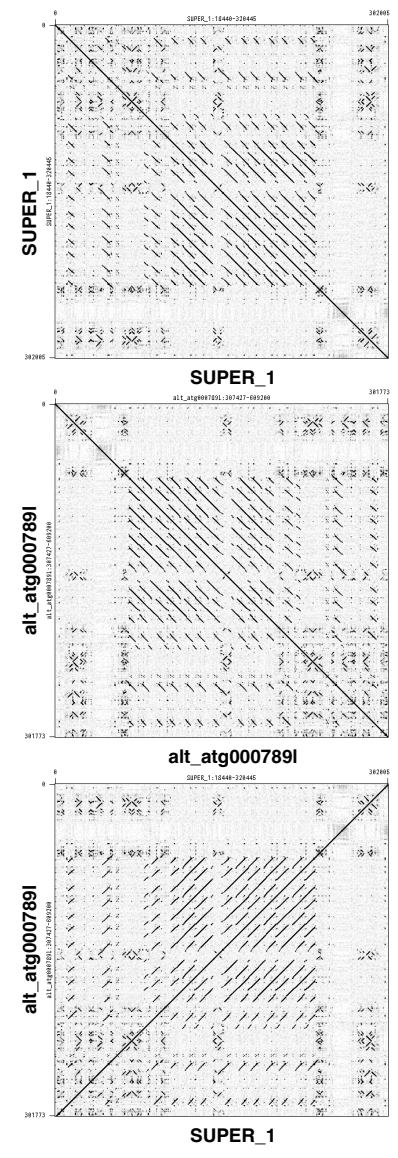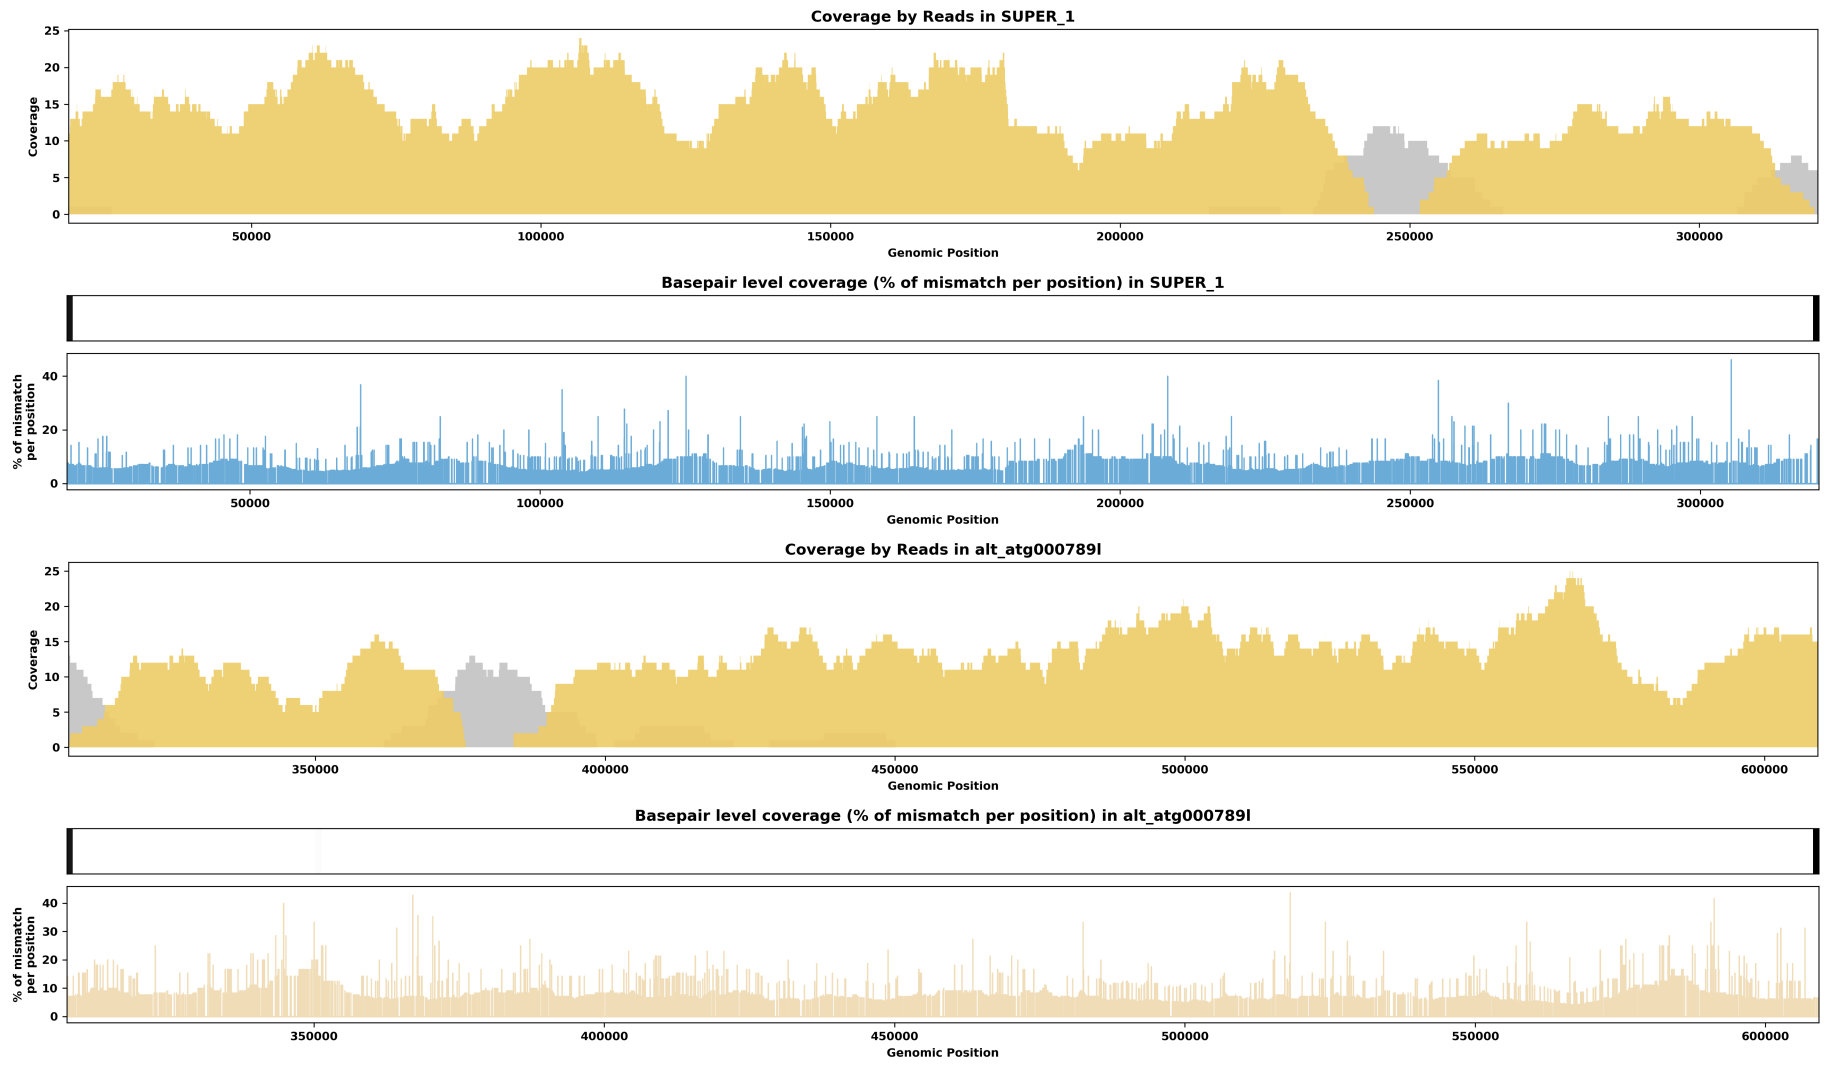

MapQ = 60  
 MapQ = 1-59  
 MapQ = 0

MapQ = 60  
 MapQ = 1-59  
 MapQ = 0

Species ID: mEubGla1  
 Common Name: North Atlantic right whale  
 Scientific Name: *Eubalaena glacialis*  
 Assembly Type: Haplotype Resolved  
 Data Source: VGP

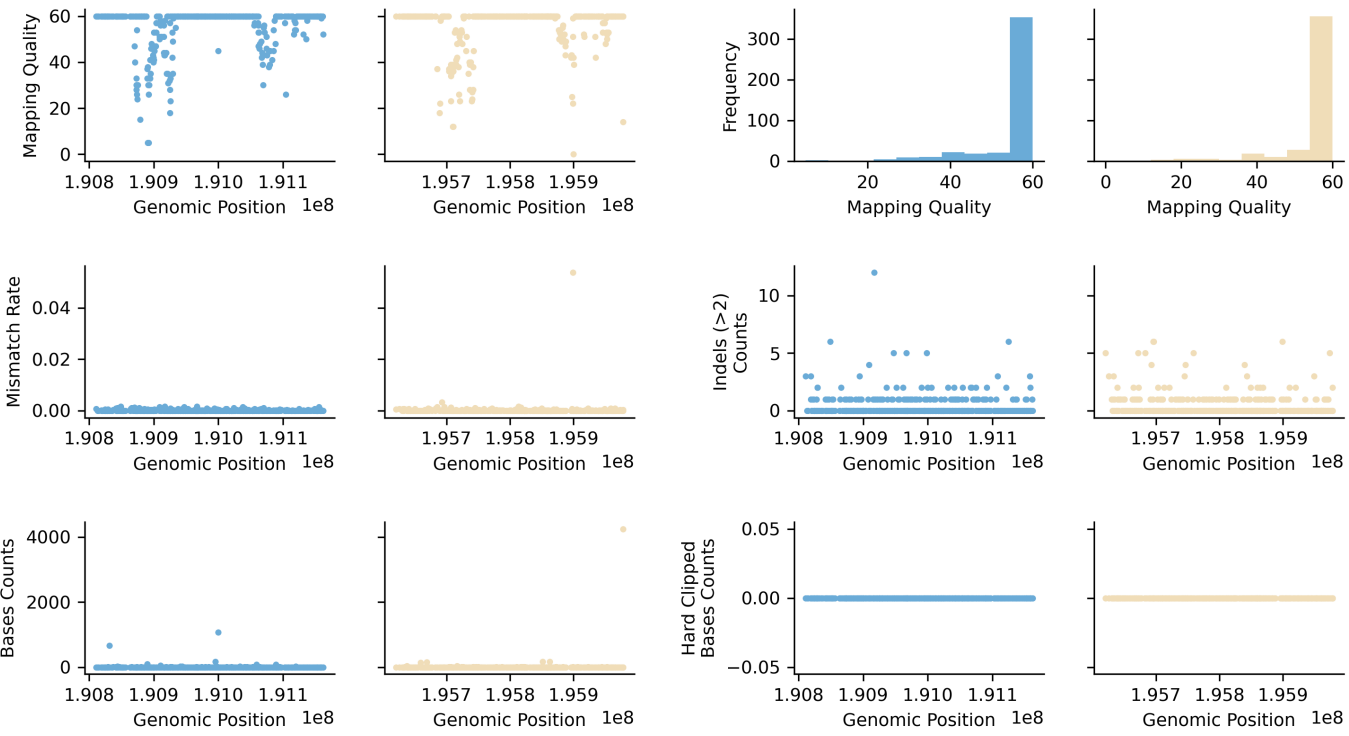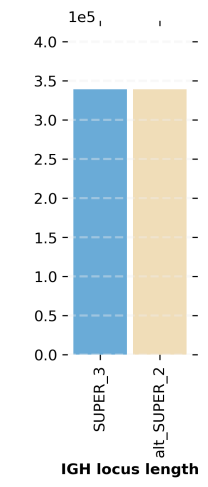

● SUPER\_3  
 ● alt\_SUPER\_2

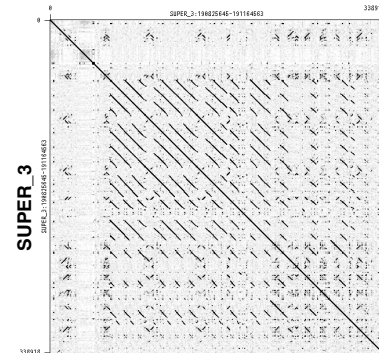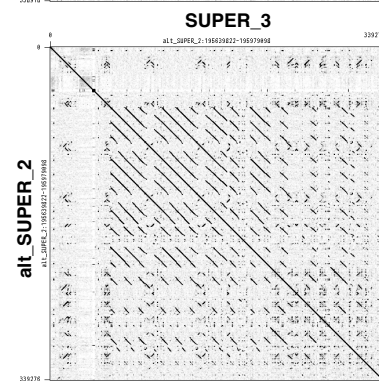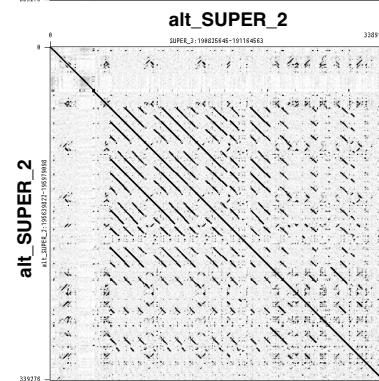

SUPER\_3

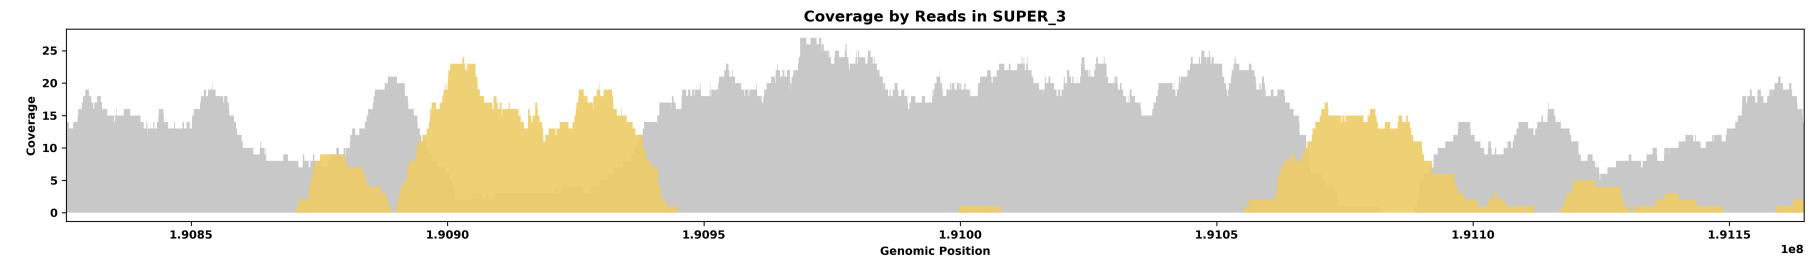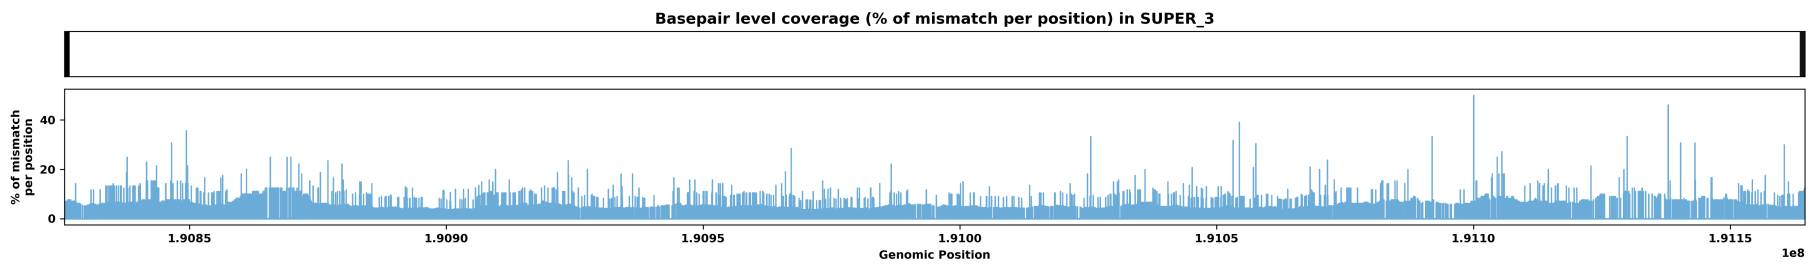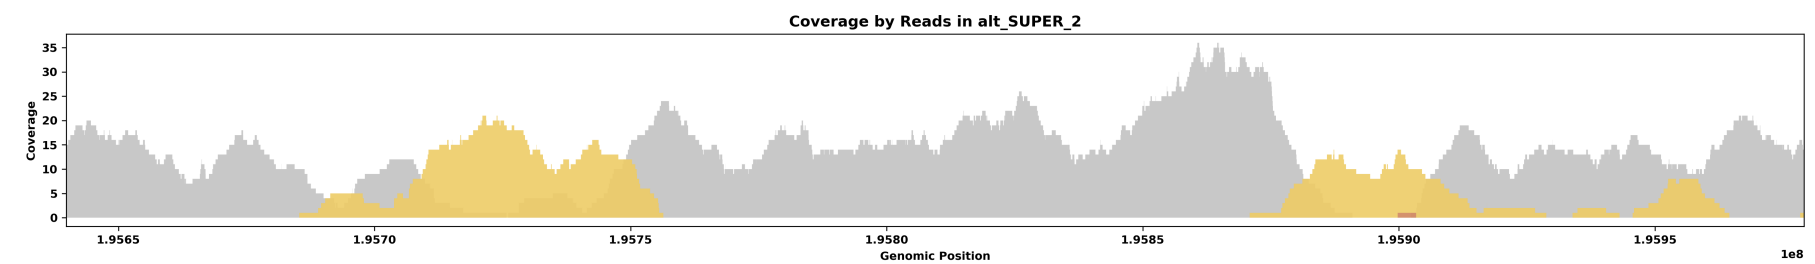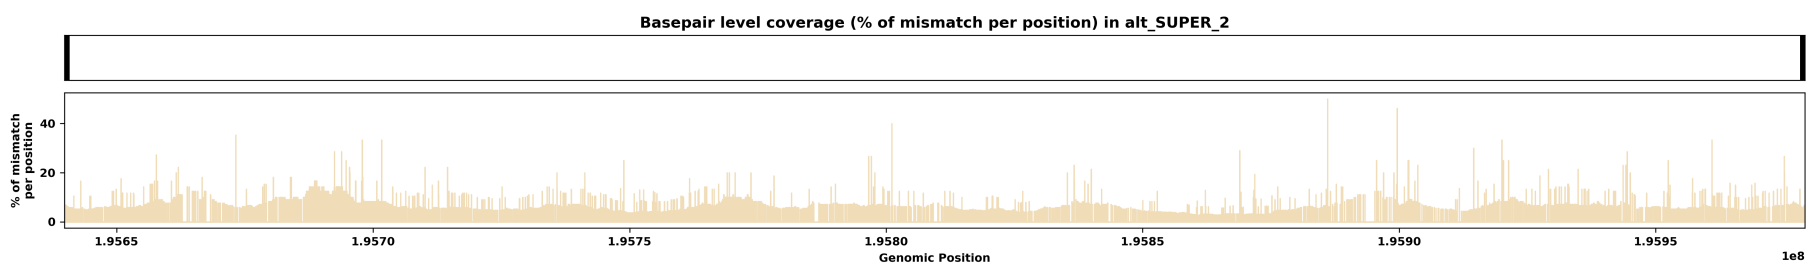



Species ID: mGloMel1  
 Common Name: long-finned pilot whale  
 Scientific Name: Globicephala melas  
 Assembly Type: Not Haplotype Resolved  
 Data Source: VGP

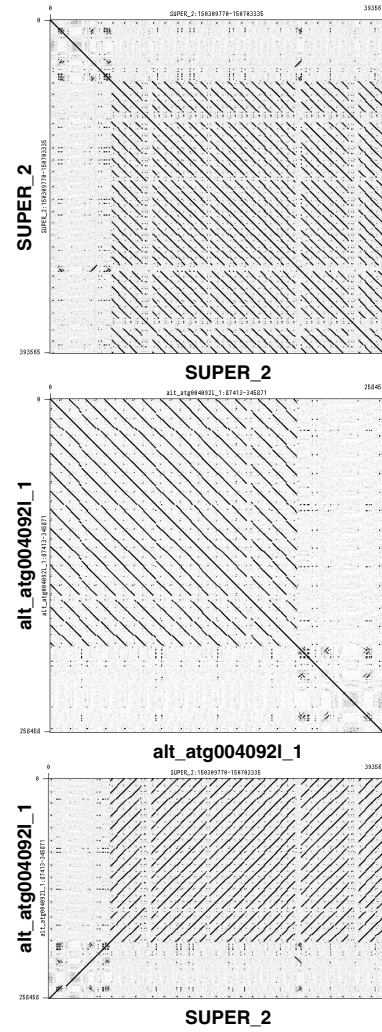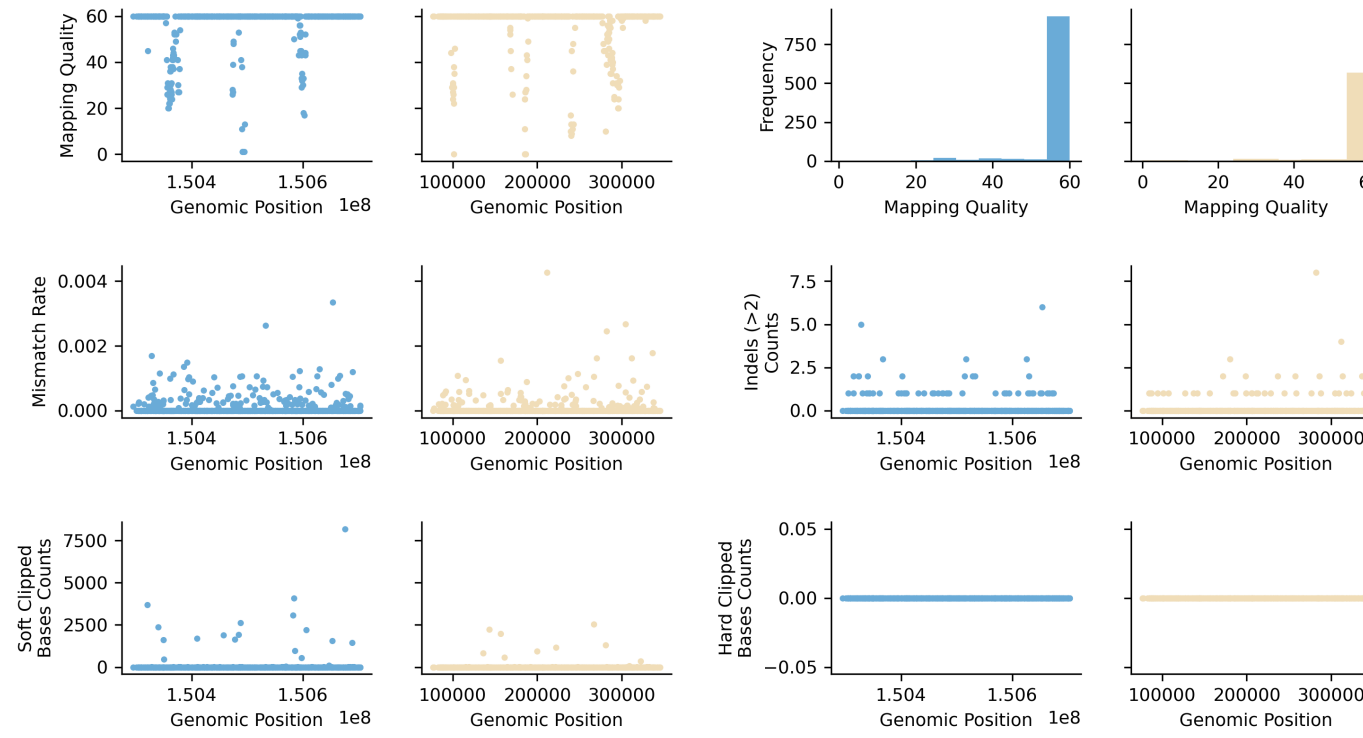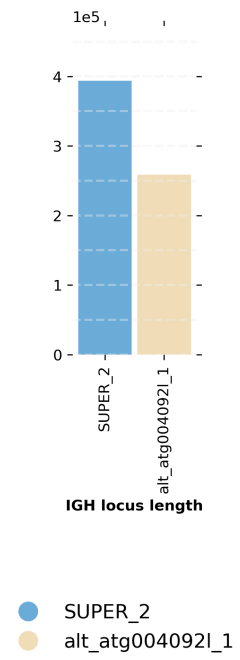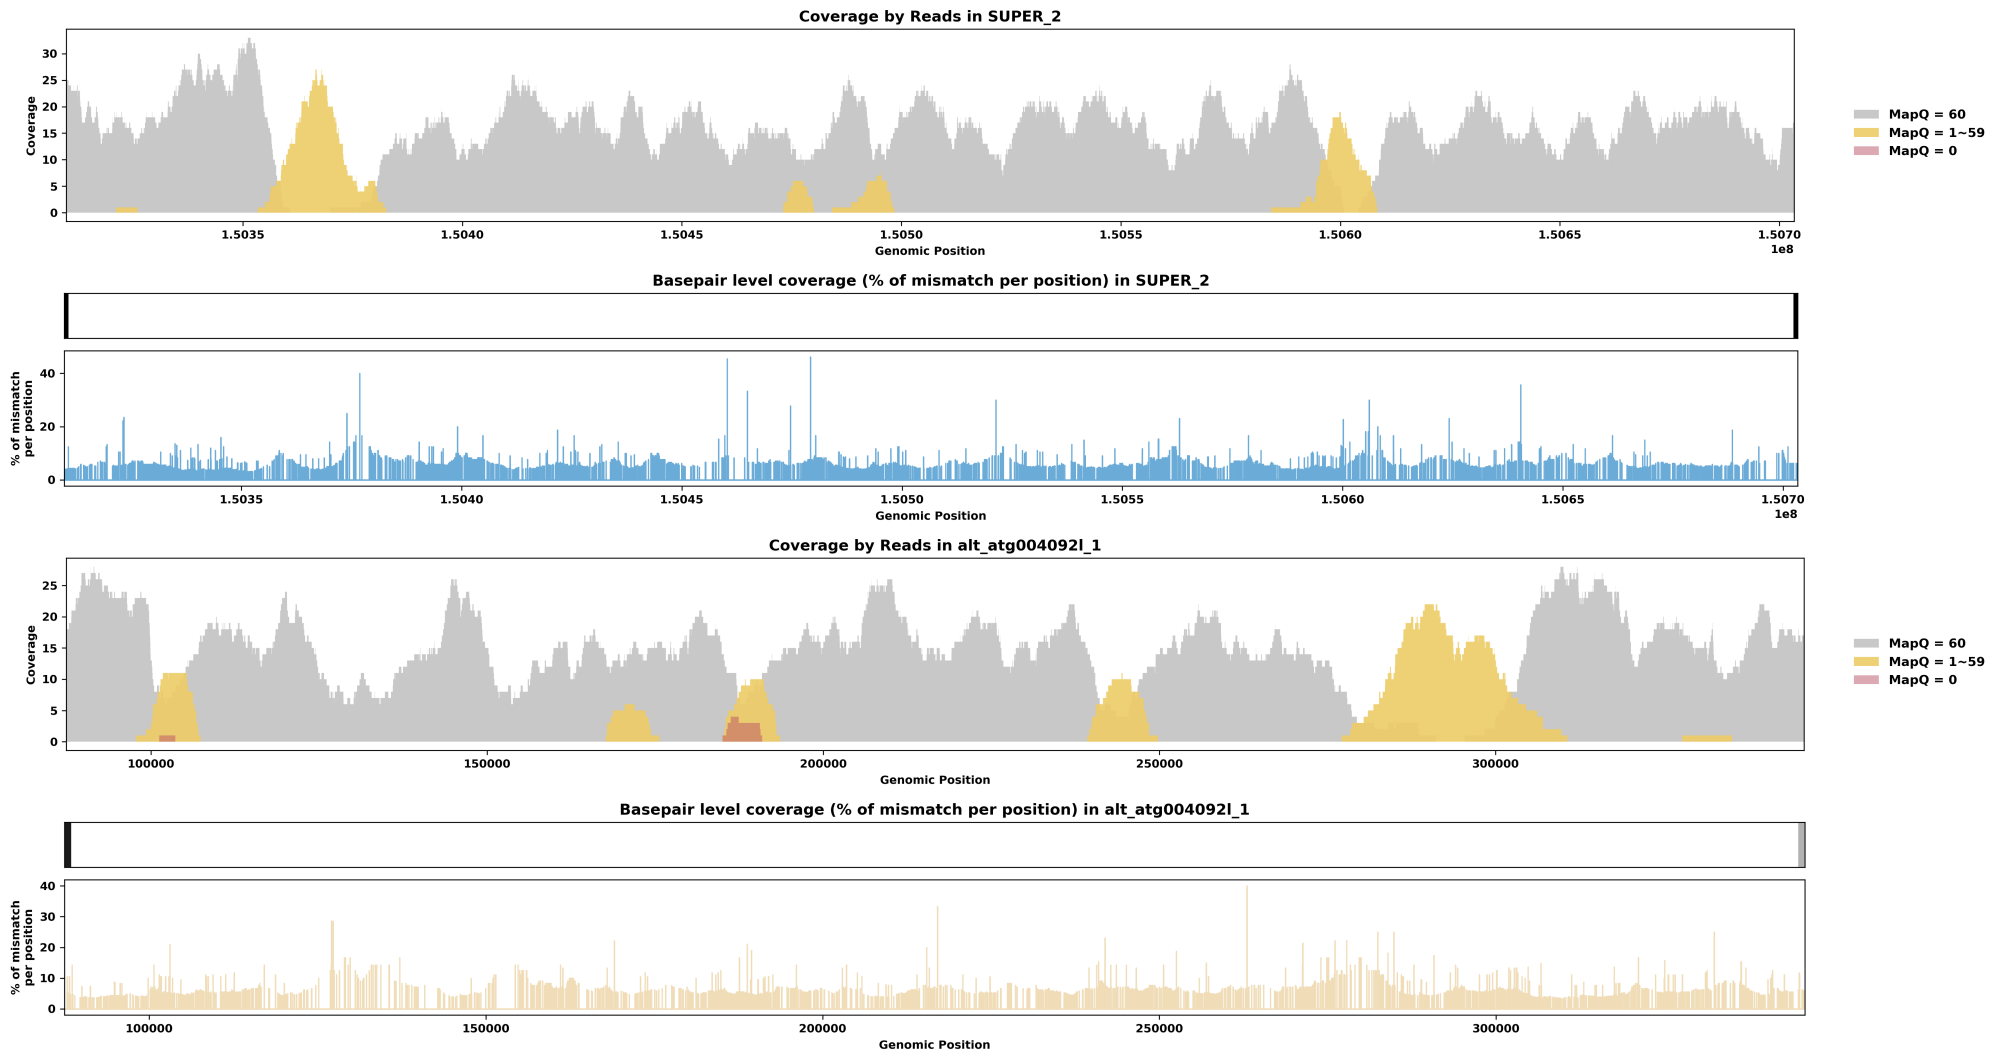

Species ID: mGorGor1  
 Common Name: Gorilla  
 Scientific Name: Gorilla\_gorilla  
 Assembly Type: Haplotype Resolved  
 Data Source: T2T Primate

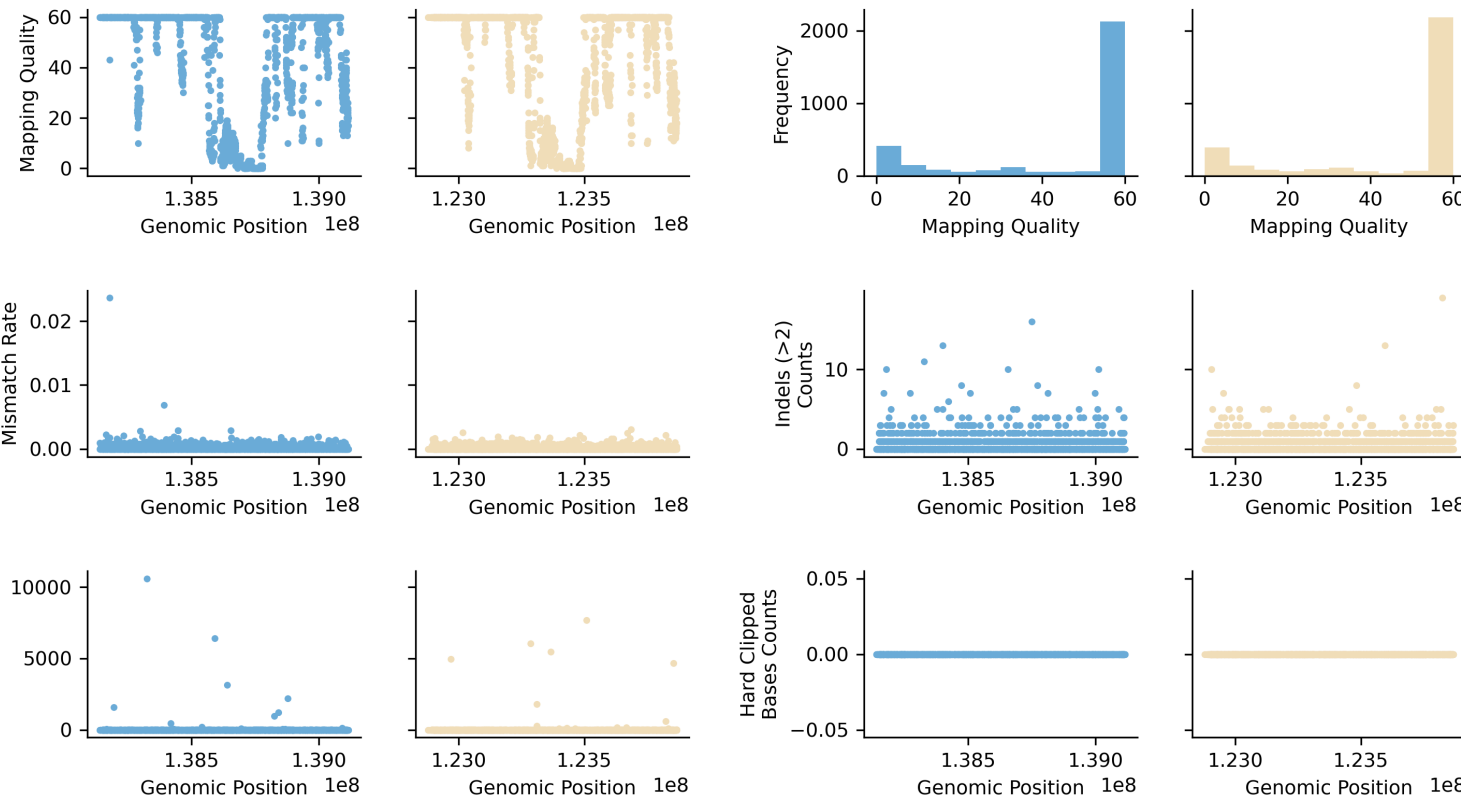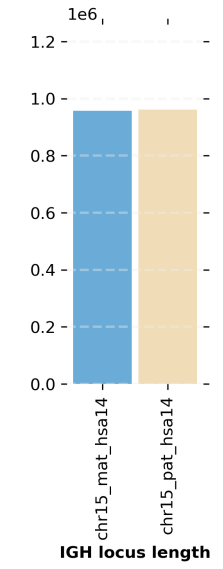

● chr15\_mat\_hsa14  
 ● chr15\_pat\_hsa14

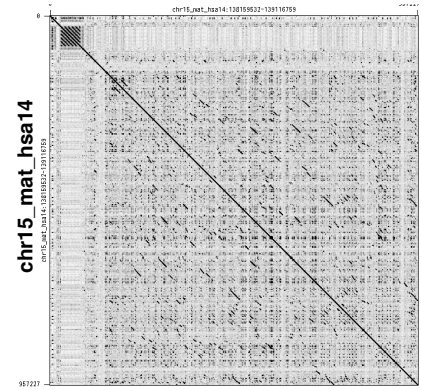

chr15\_mat\_hsa14

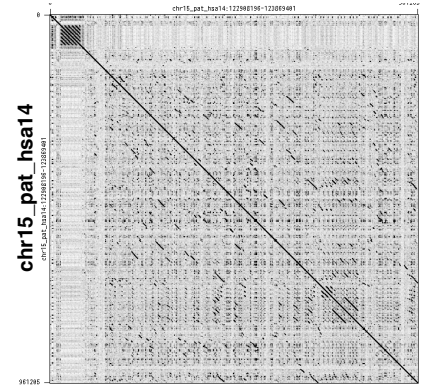

chr15\_pat\_hsa14

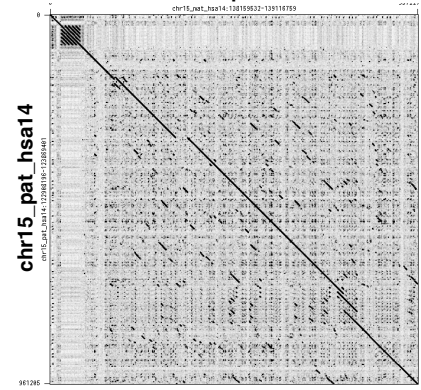

chr15\_mat\_hsa14

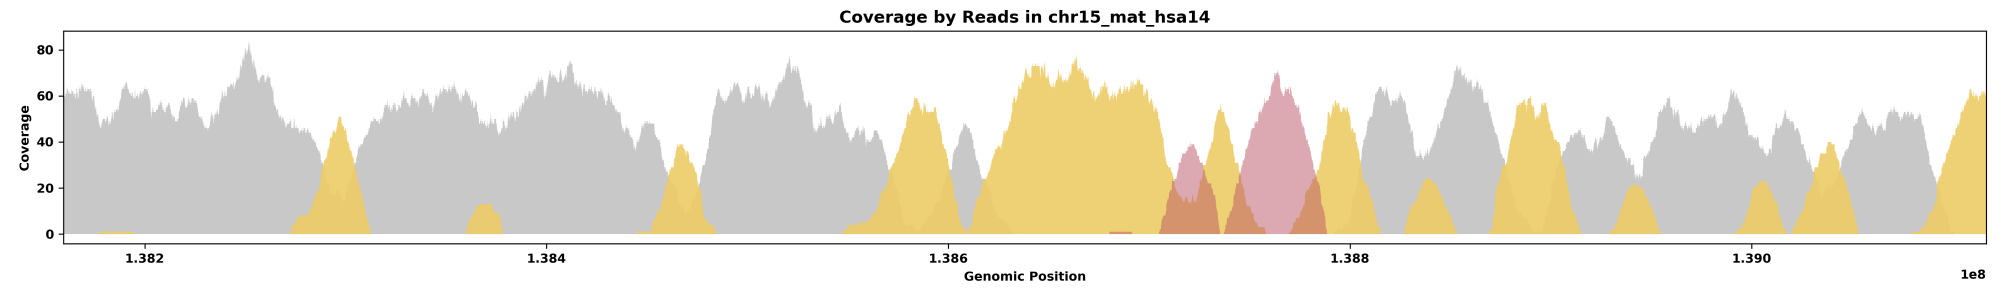

■ MapQ = 60  
 ■ MapQ = 1-59  
 ■ MapQ = 0

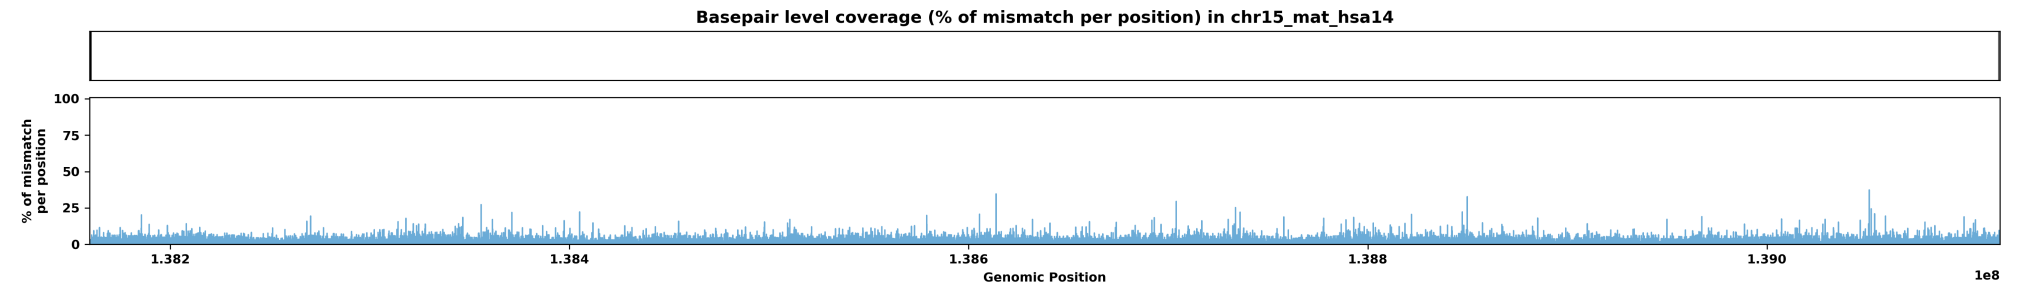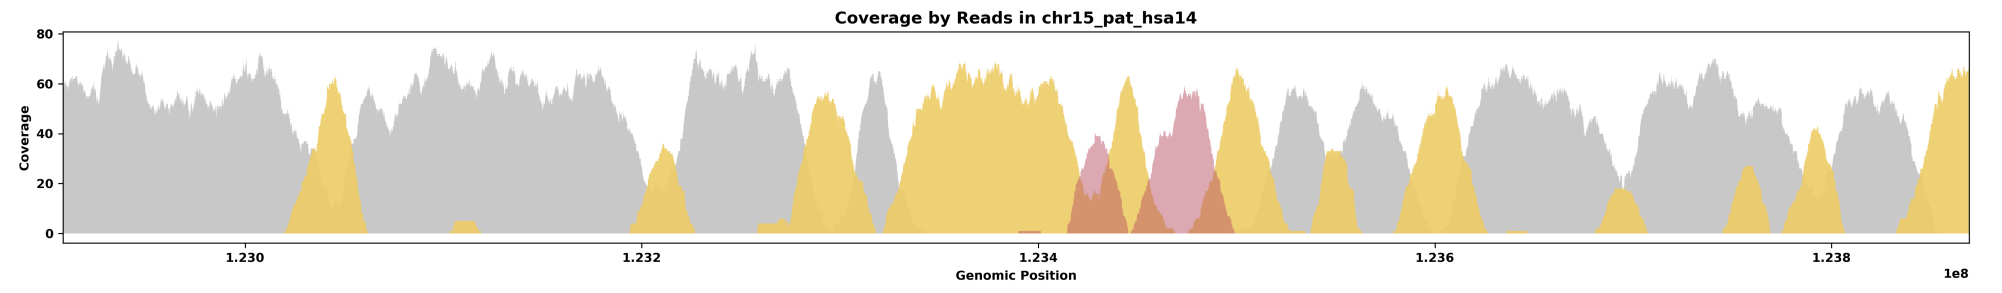

■ MapQ = 60  
 ■ MapQ = 1-59  
 ■ MapQ = 0

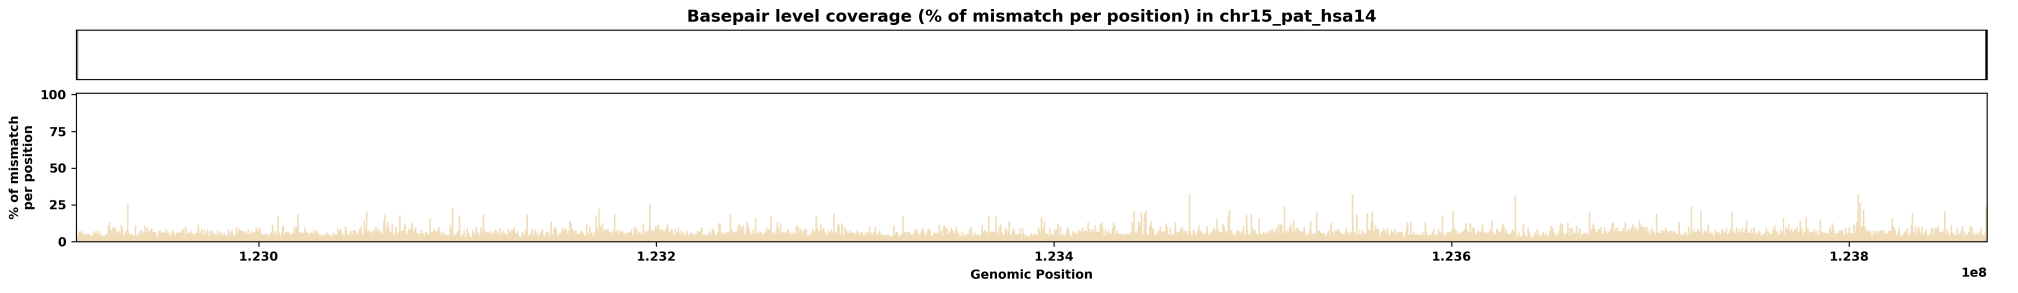

Species ID: mHetBru1  
 Common Name: Yellow-spotted hyrax  
 Scientific Name: Heterohyrax brucei  
 Assembly Type: Not Haplotype Resolved  
 Data Source: VGP

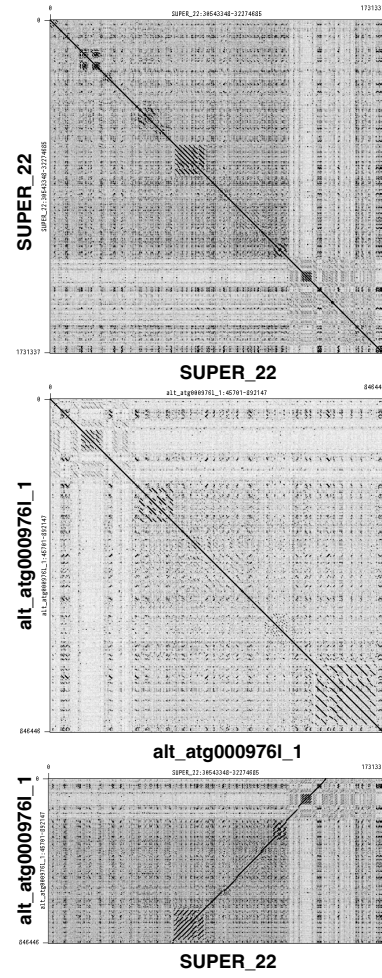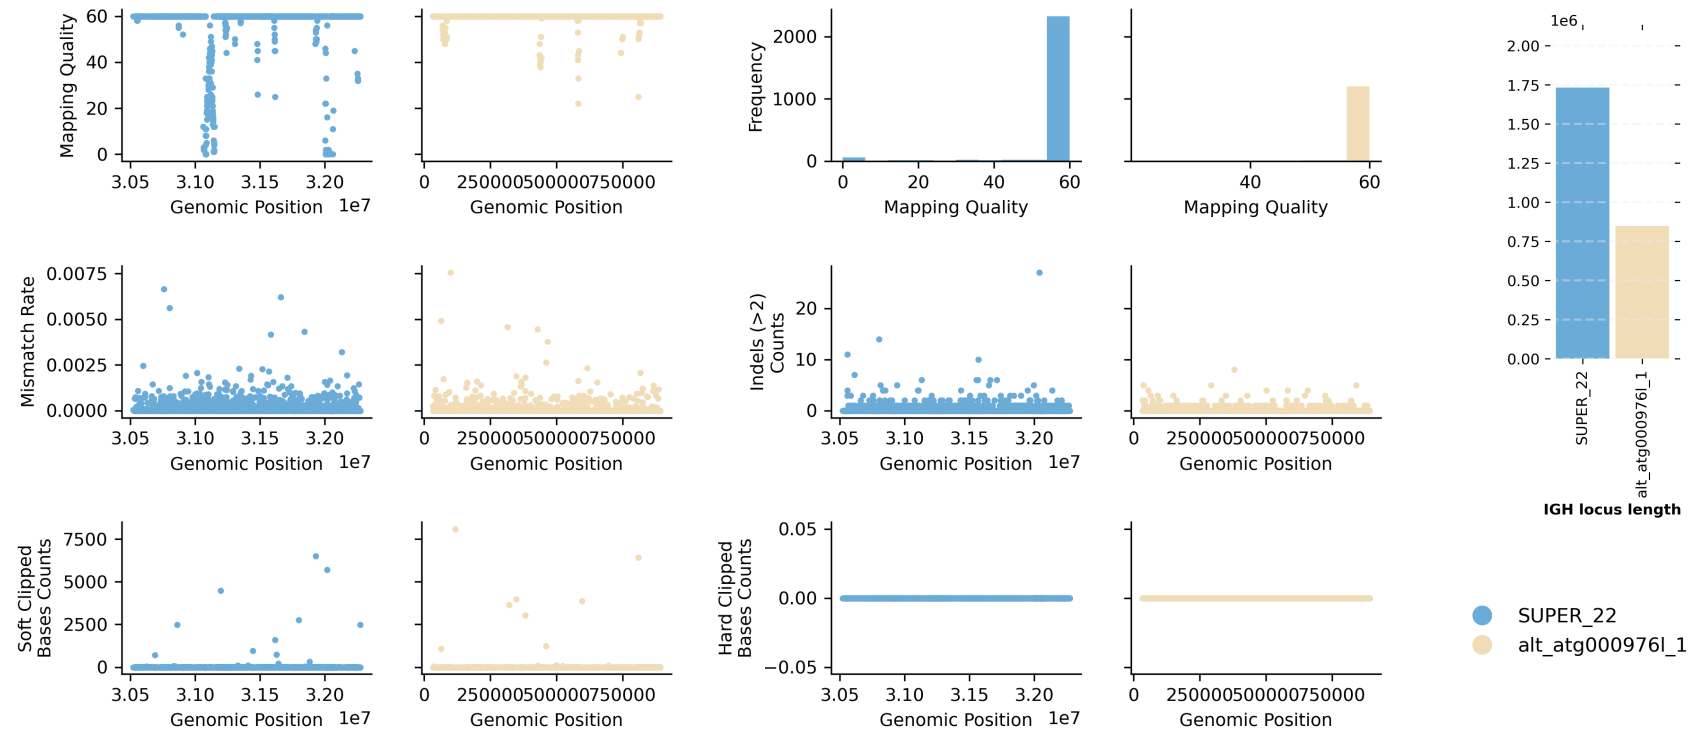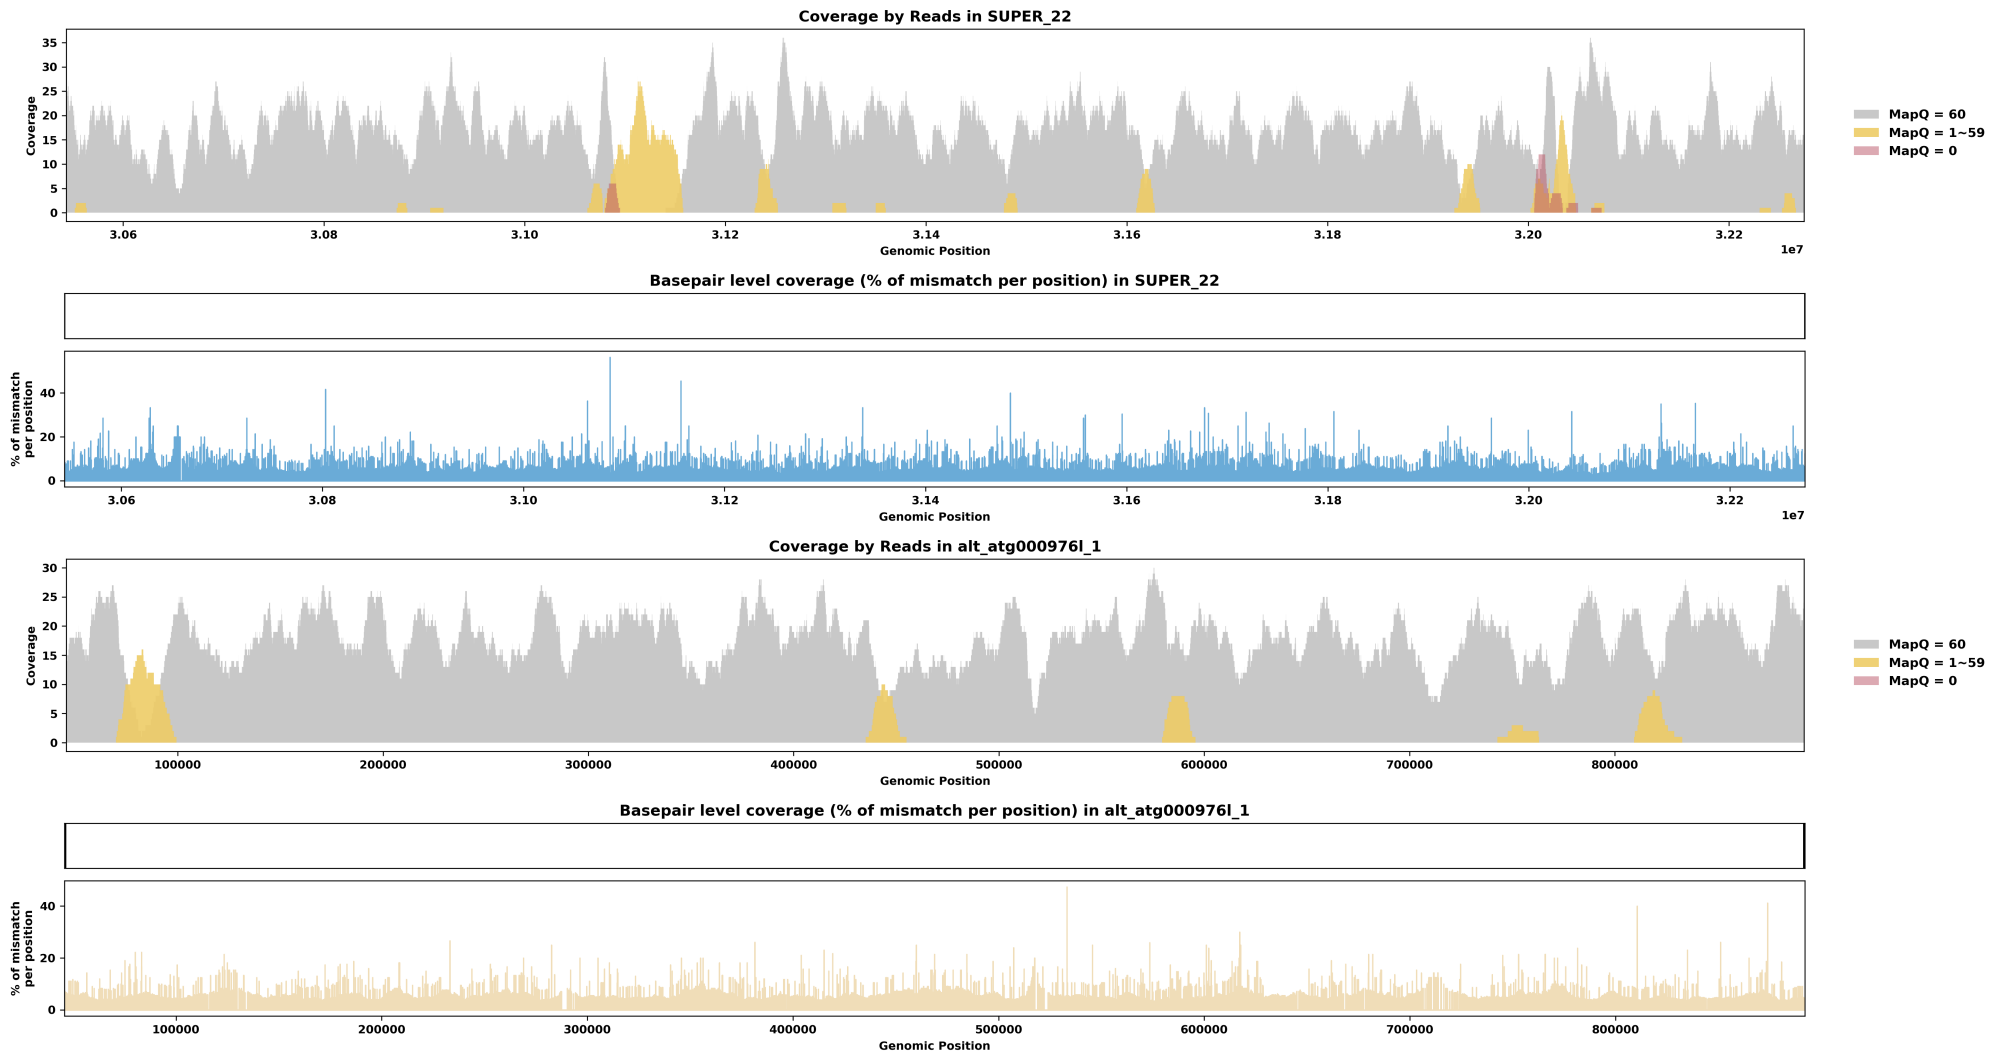

Species ID: mHipAmp2

Common Name: hippopotamus

Scientific Name: Hippopotamus amphibius kiboko

Assembly Type: Haplotype Resolved

Data Source: VGP

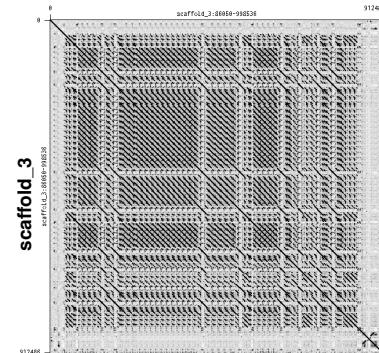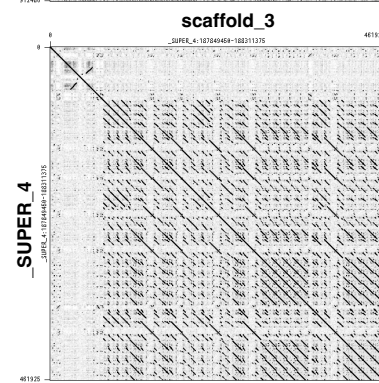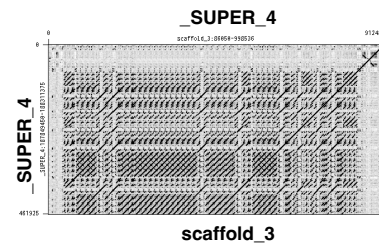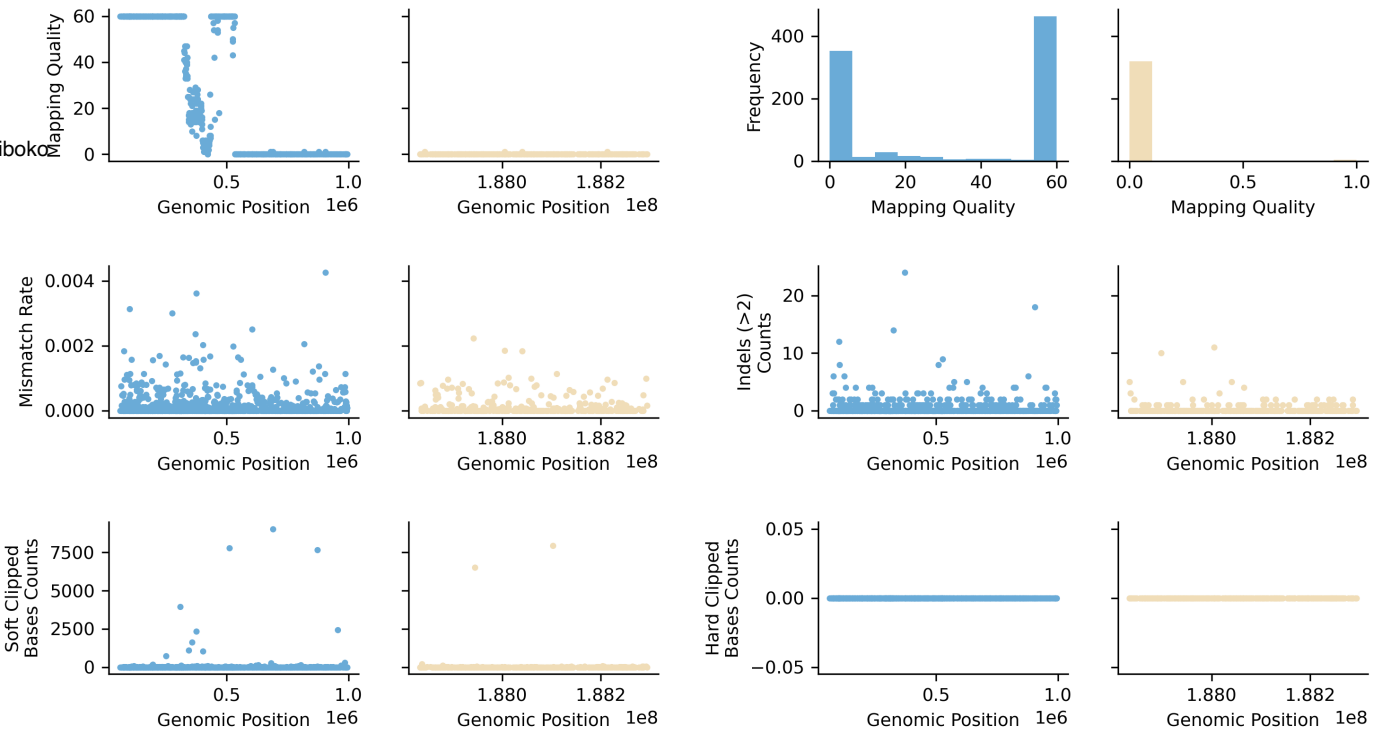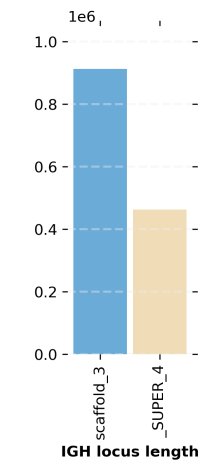

● scaffold\_3

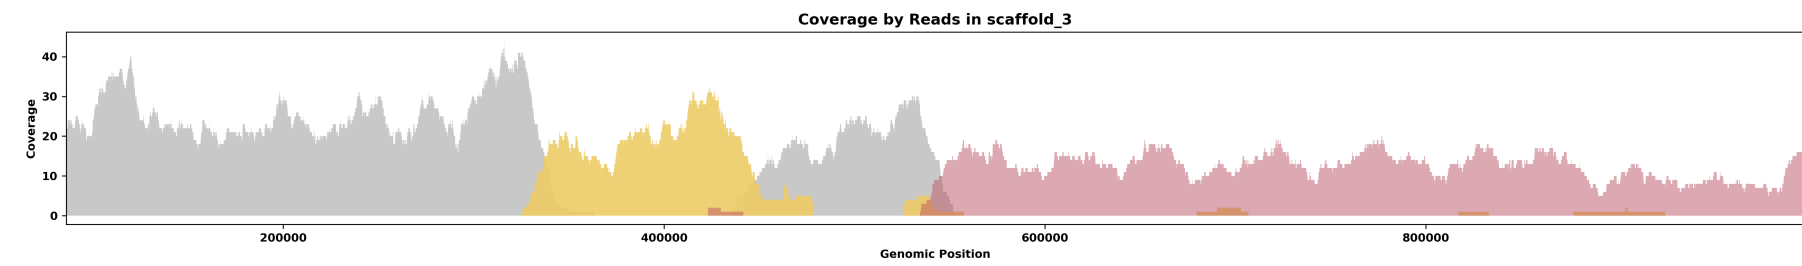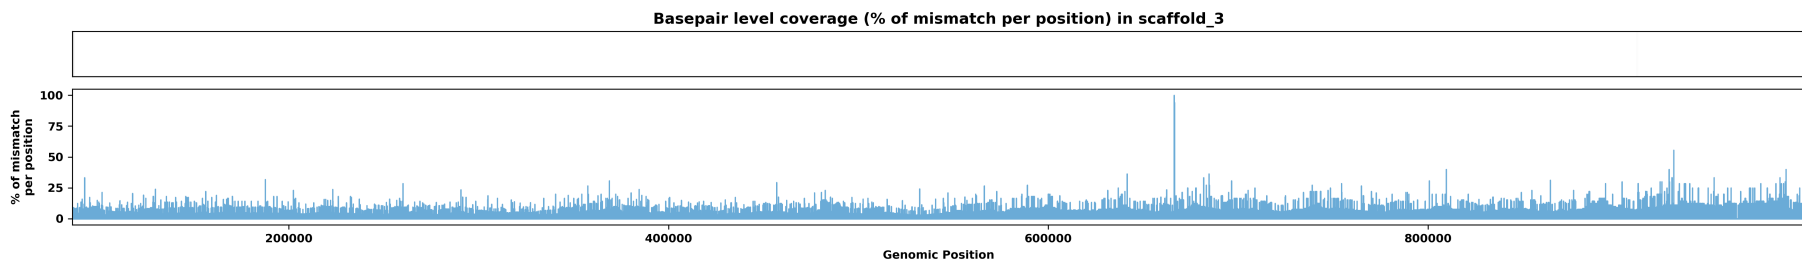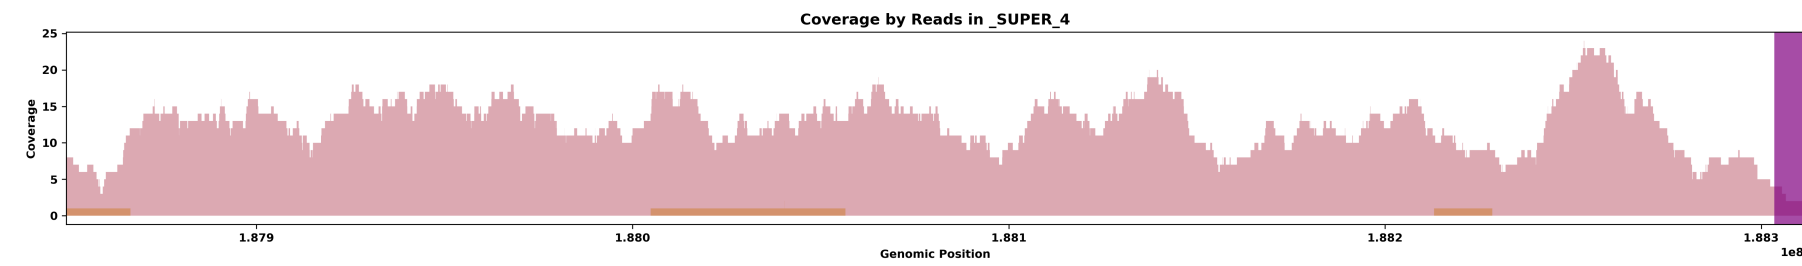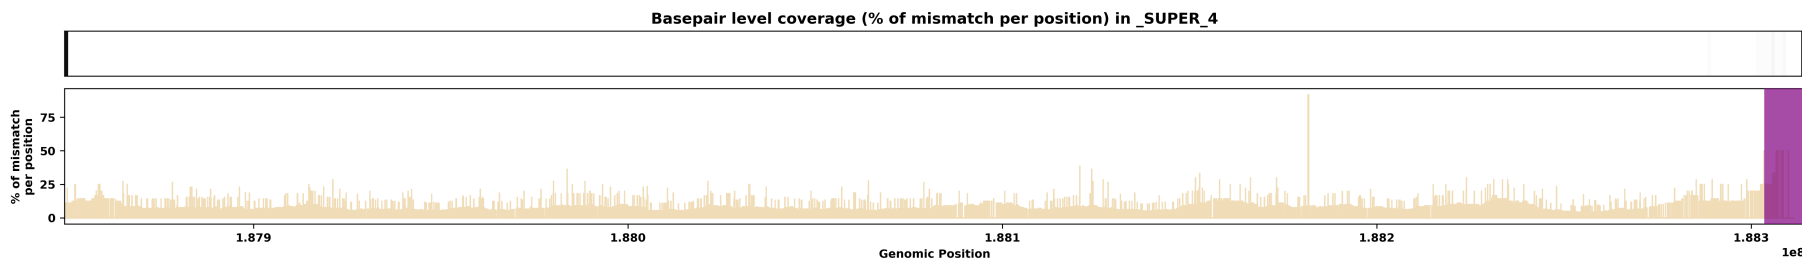

Species ID: mHypAmp2  
 Common Name: northern bottlenose whale  
 Scientific Name: Hyperoodon ampullatus  
 Assembly Type: Not Haplotype Resolved  
 Data Source: VGP

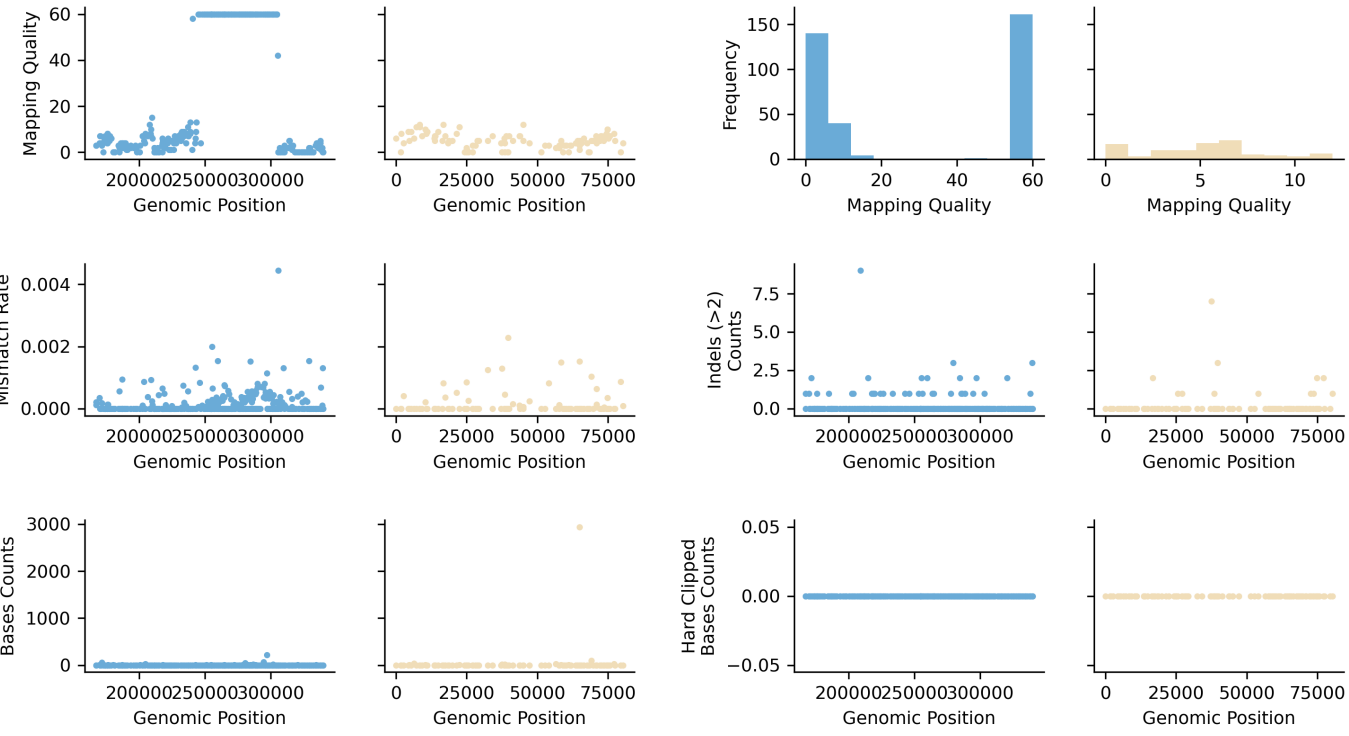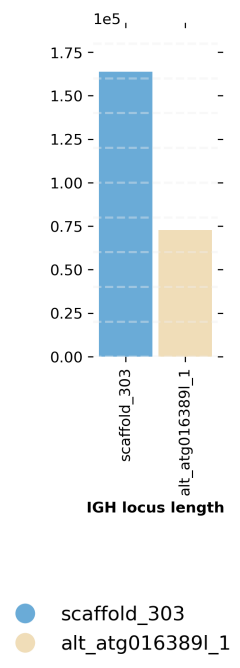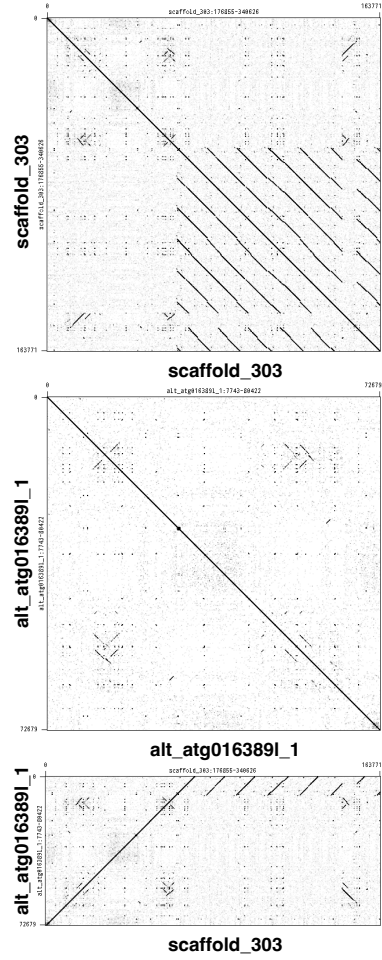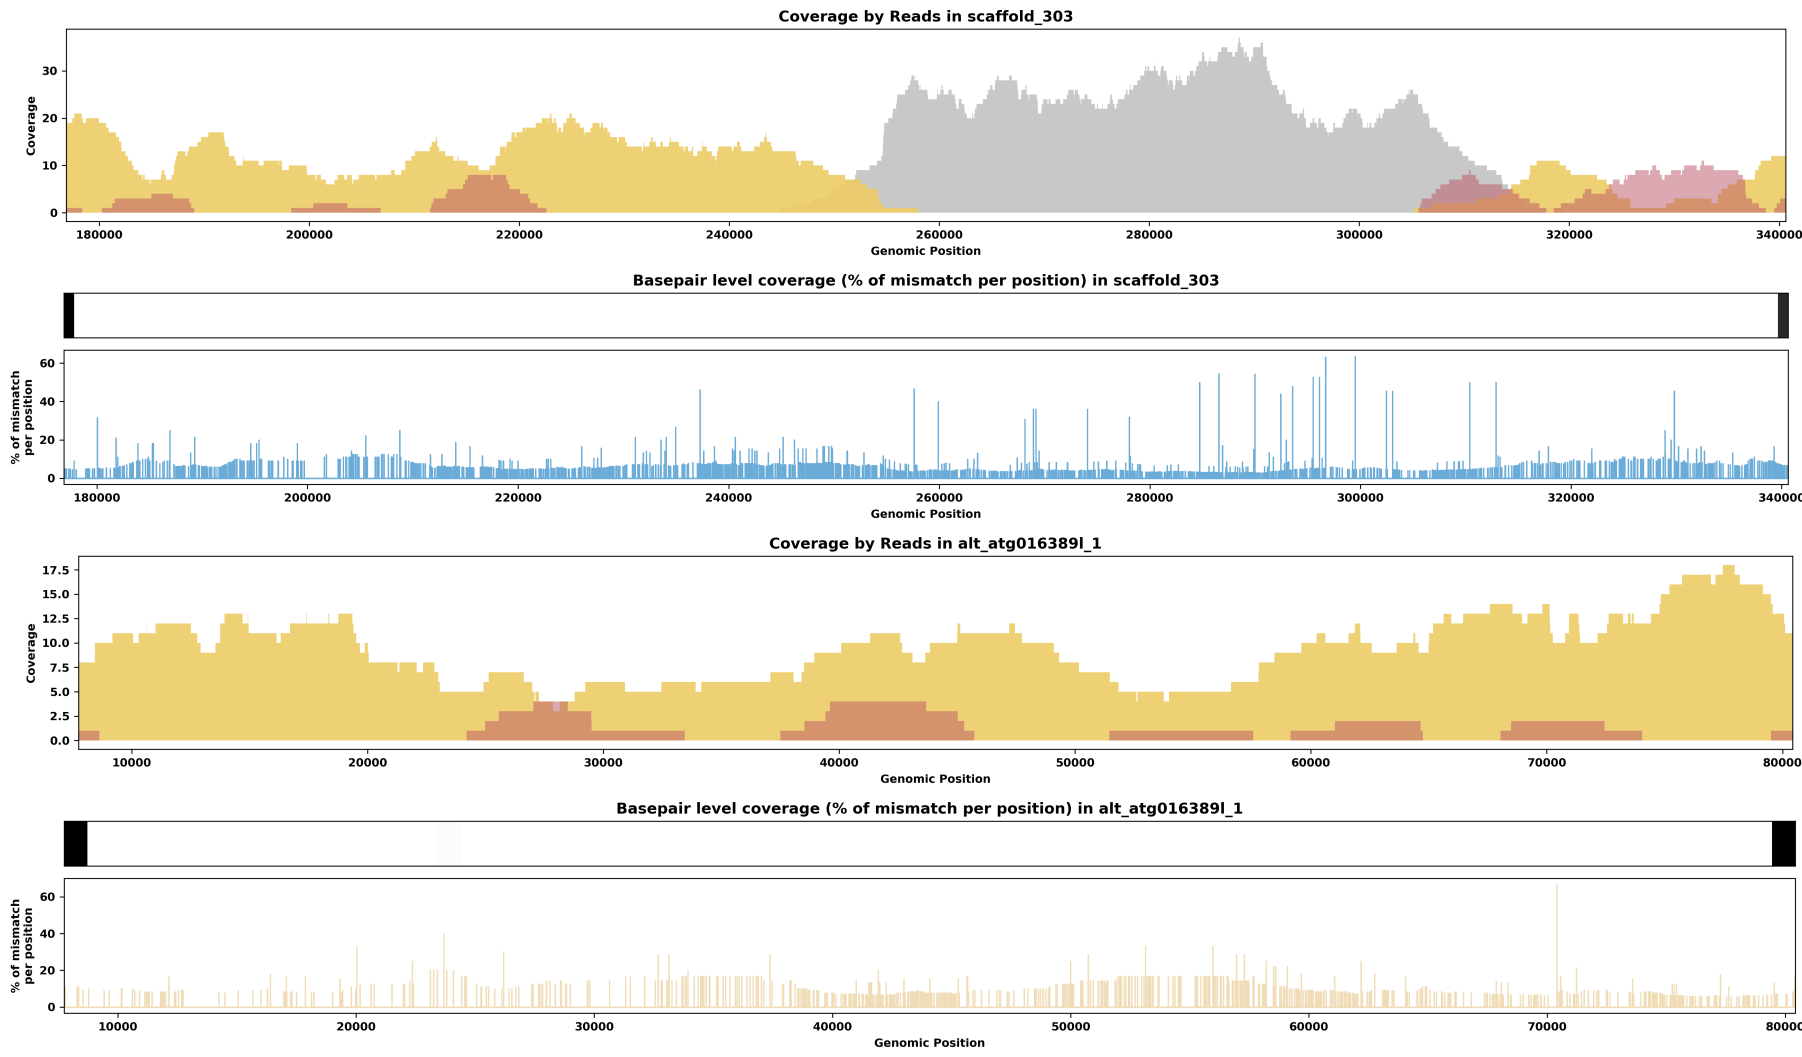

Species ID: mLagAlb1

Common Name: white-beaked dolphin

Scientific Name: Lagenorhynchus albirostris

Assembly Type: Not Haplotype Resolved

Data Source: VGP

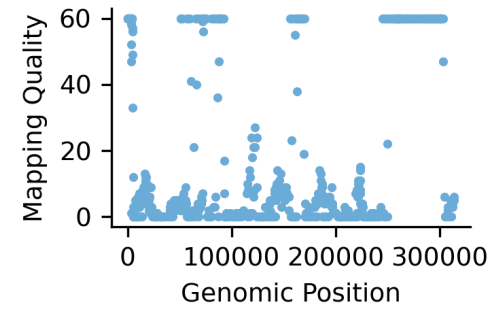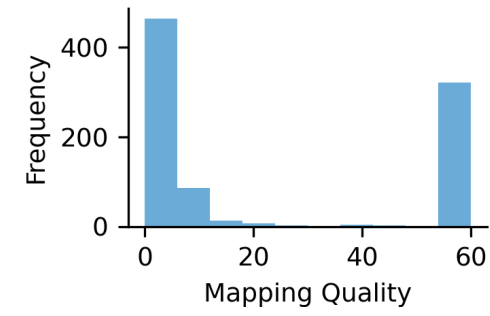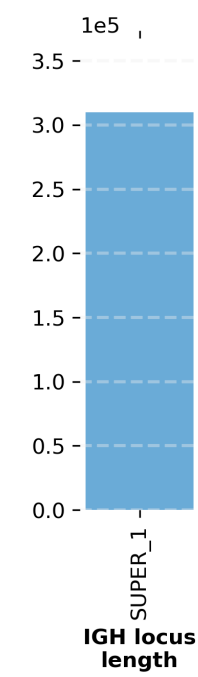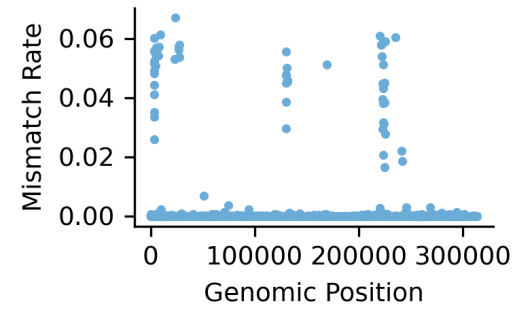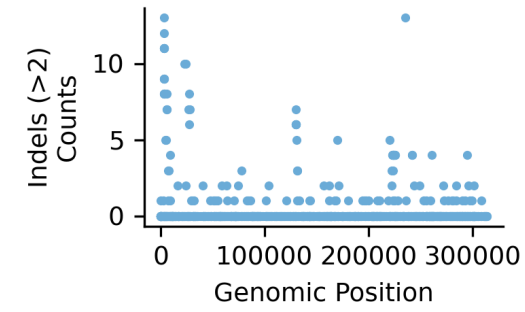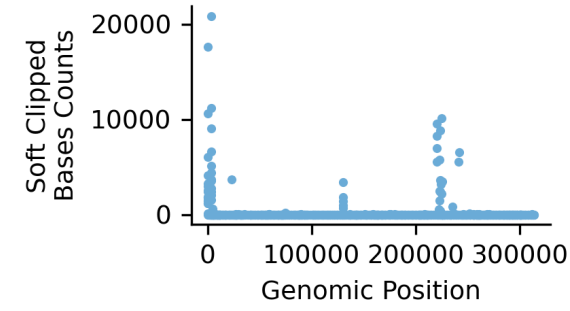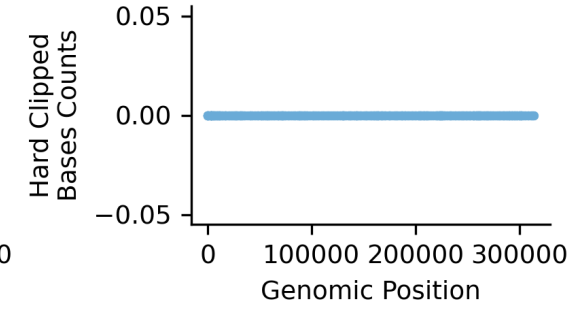

● SUPER\_1

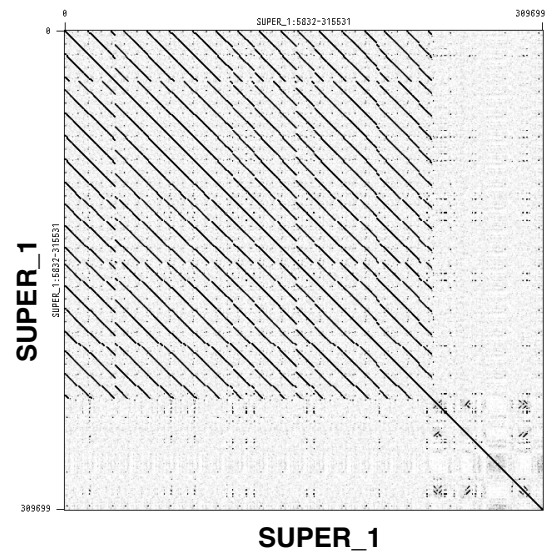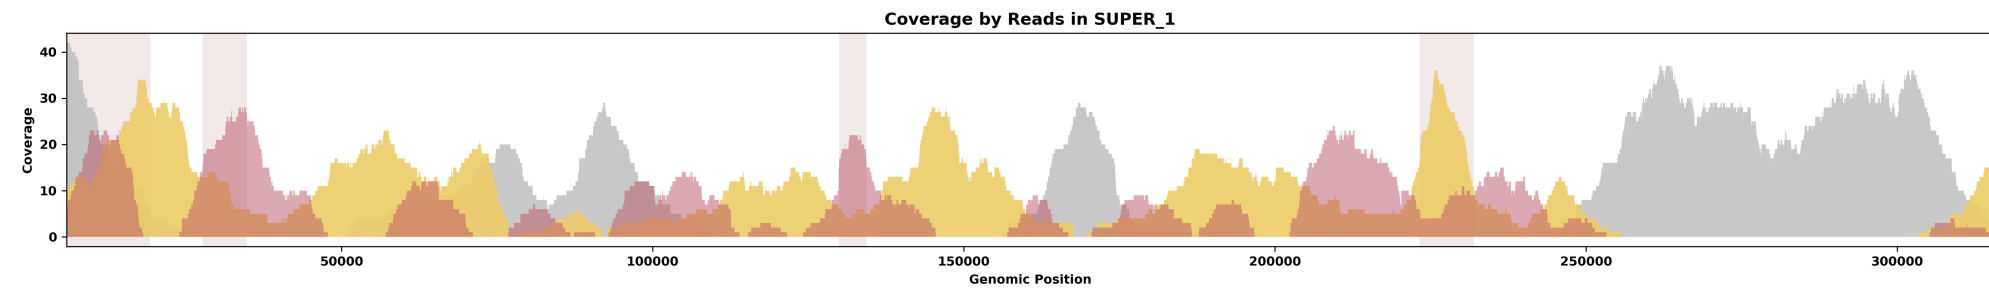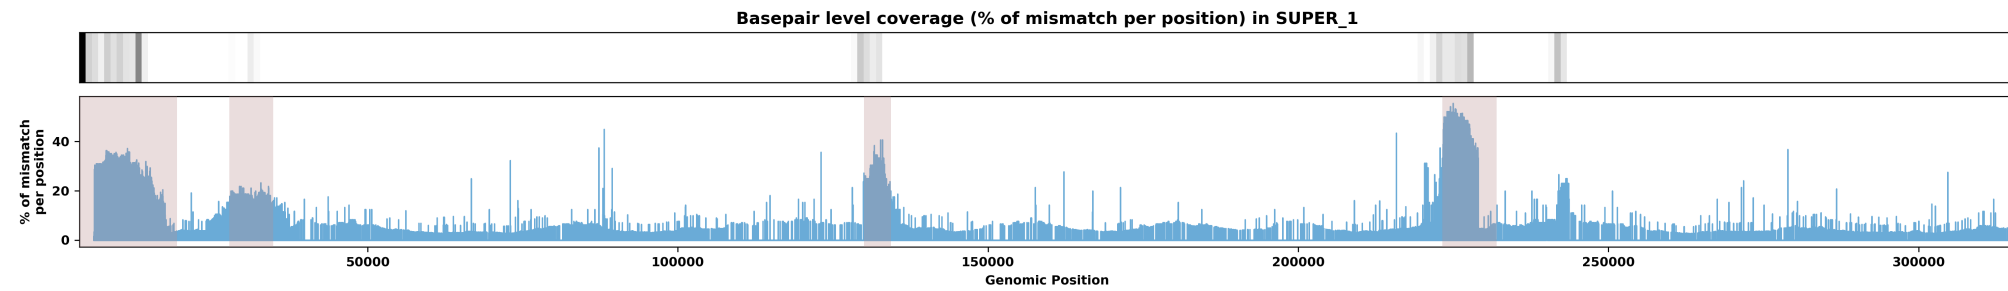

Species ID: mLemCat1  
 Common Name: Ring-tailed lemur  
 Scientific Name: Lemur catta  
 Assembly Type: Not Haplotype Resolved  
 Data Source: VGP

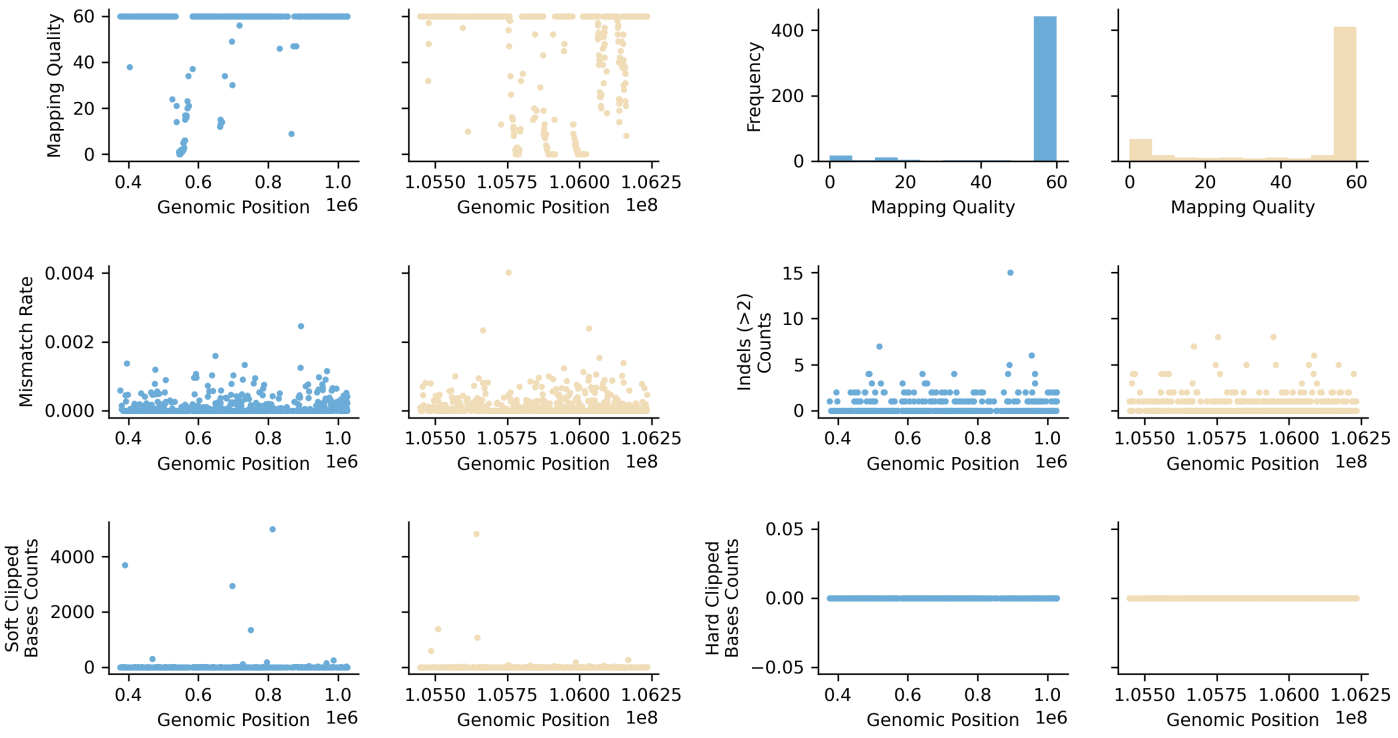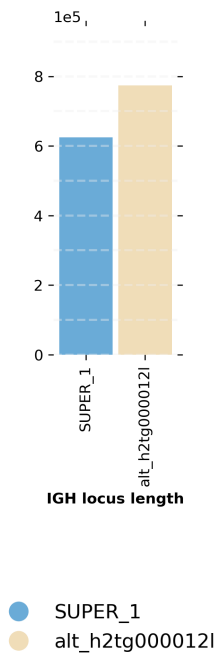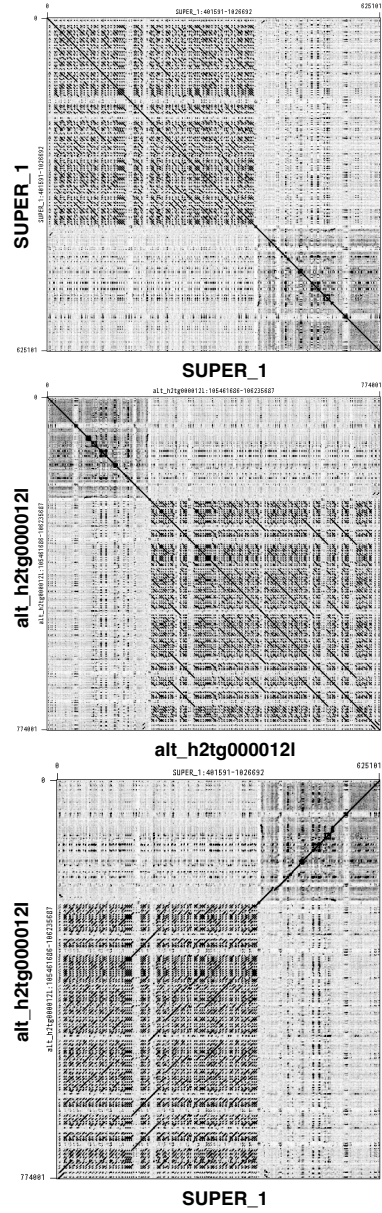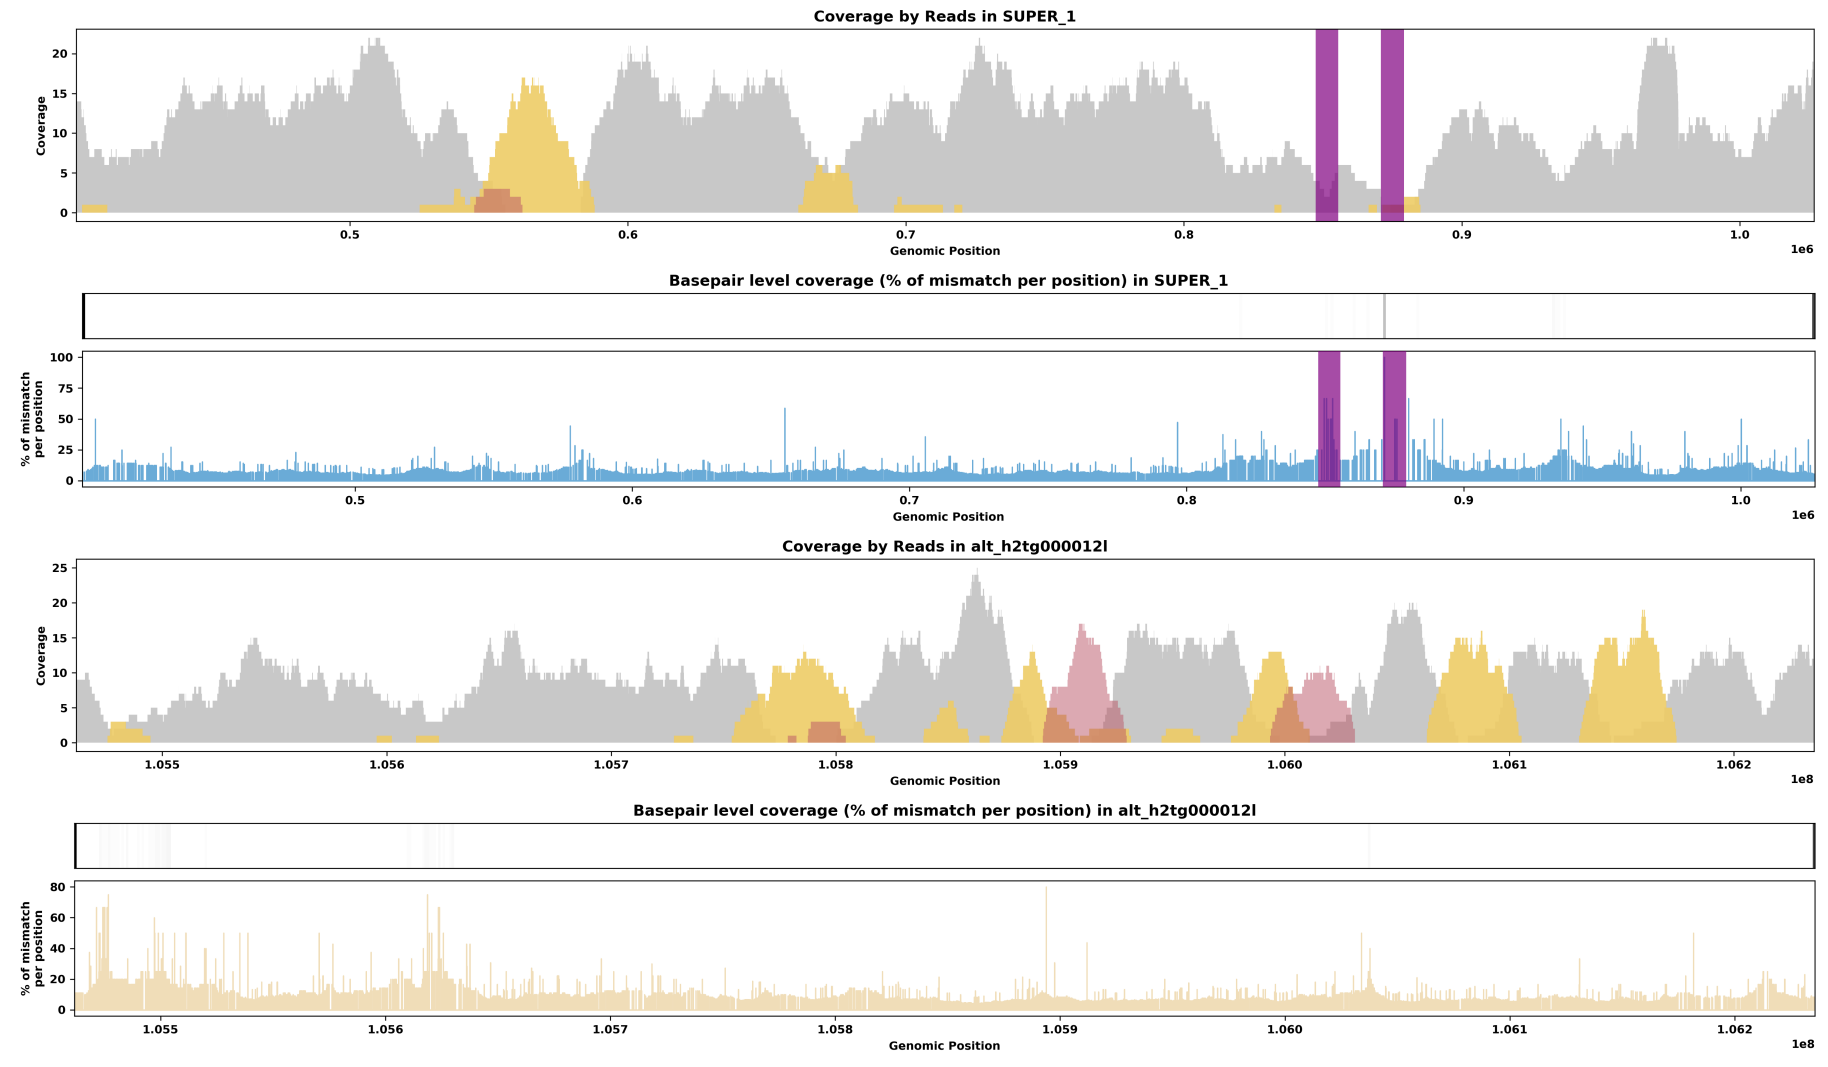

MapQ = 60  
 MapQ = 1-59  
 MapQ = 0

Species ID: mLynRuf1

Common Name: Bobcat

Scientific Name: Lynx rufus

Assembly Type: Not Haplotype Resolved

Data Source: CCGP

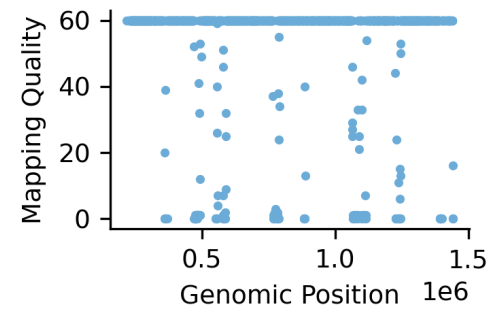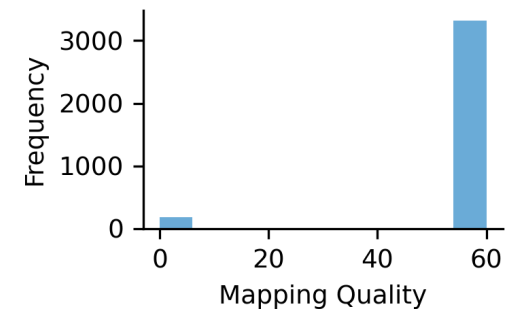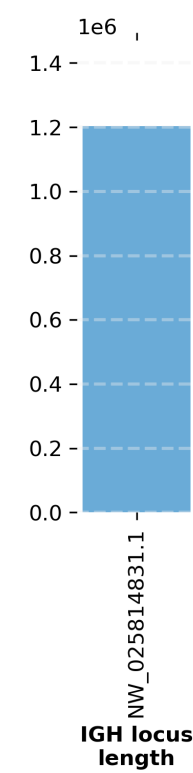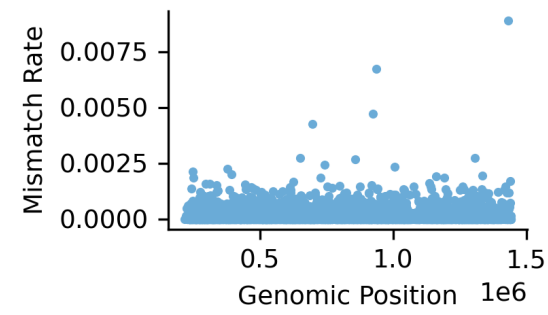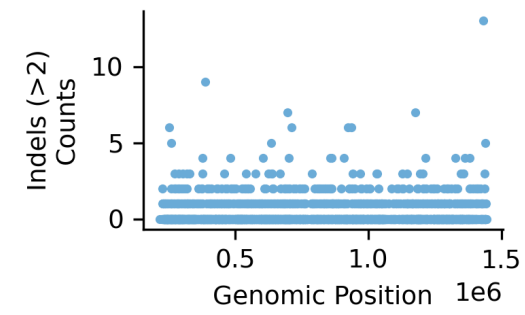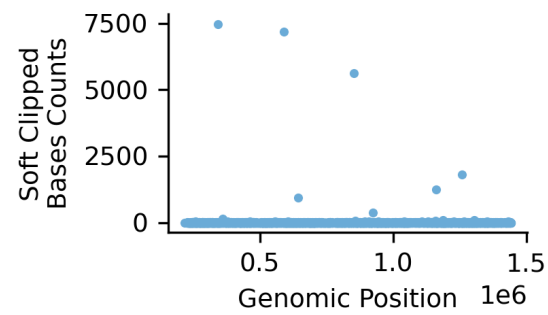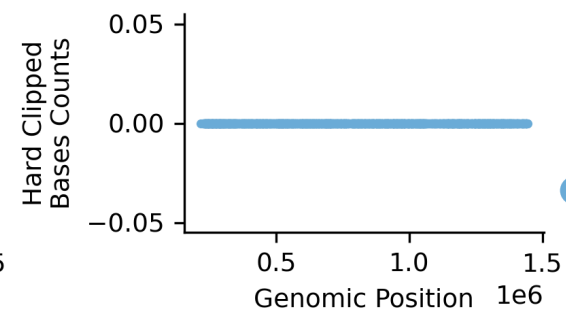

● NW\_025814831.1

NW\_025814831.1

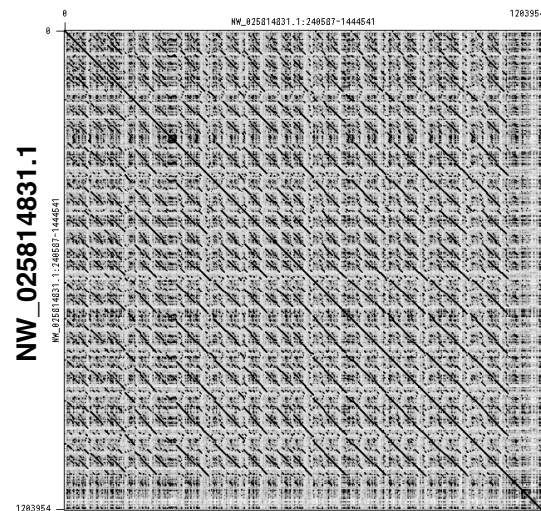

NW\_025814831.1

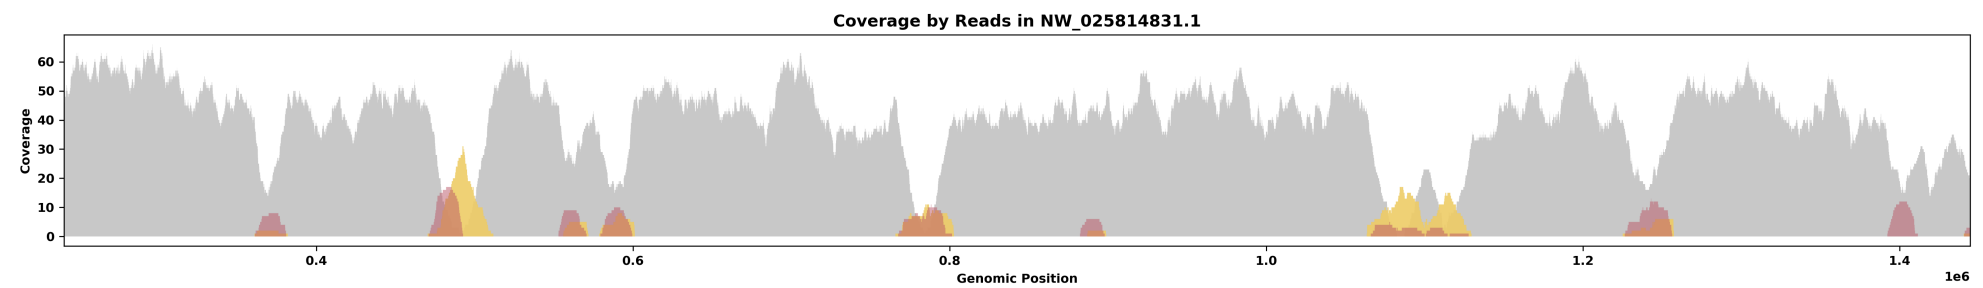

MapQ = 60  
MapQ = 1-59  
MapQ = 0

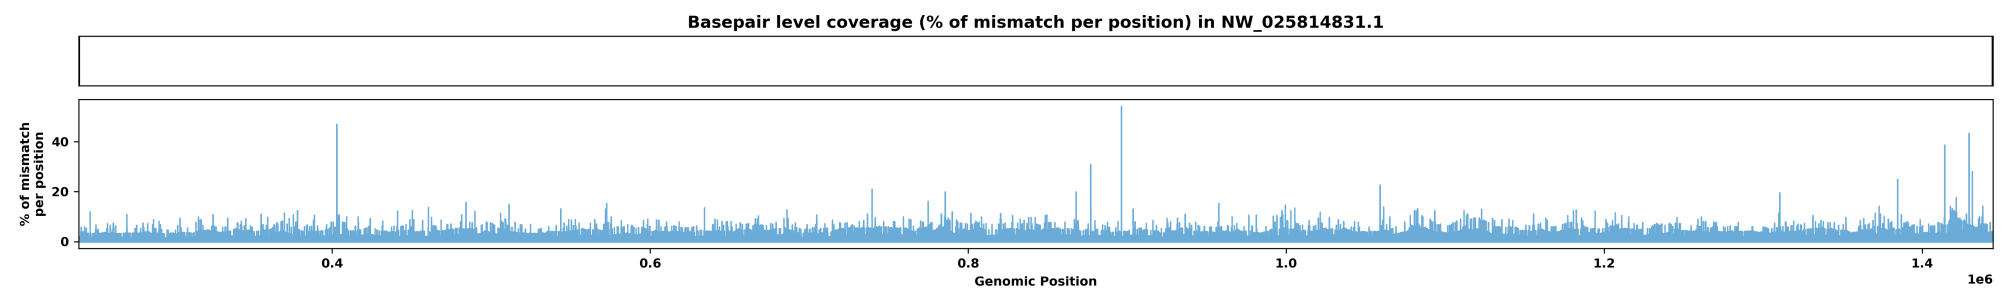



Species ID: mMacEug1

Common Name: tammar wallaby

Scientific Name: Macropus eugenii

Assembly Type: Not Haplotype Resolved

Data Source: VGP

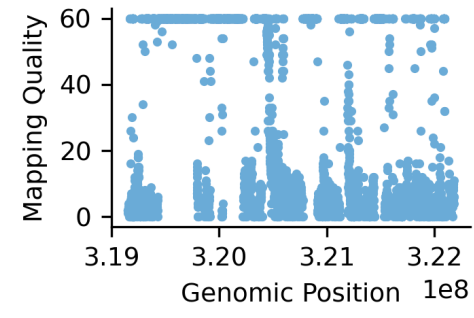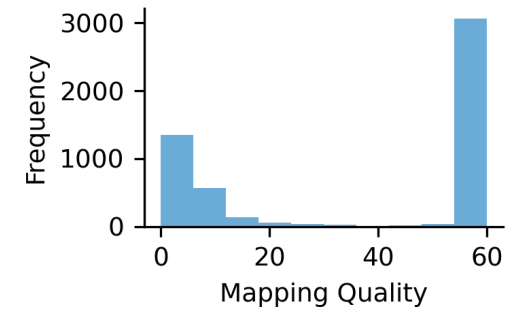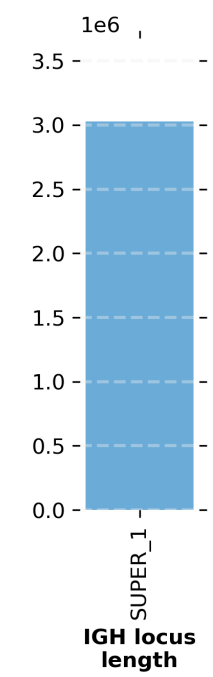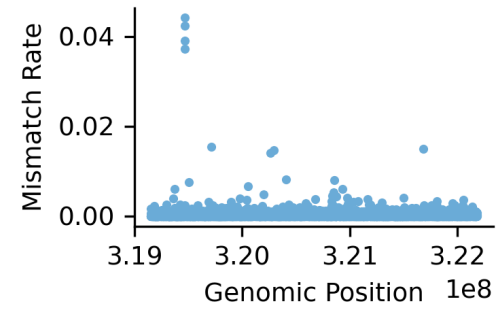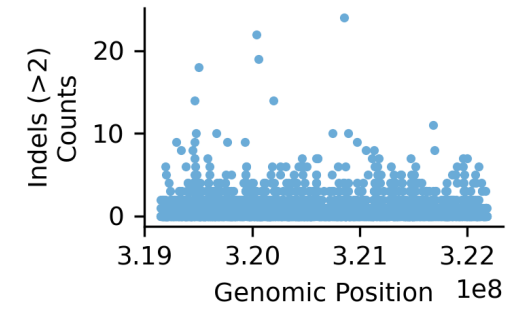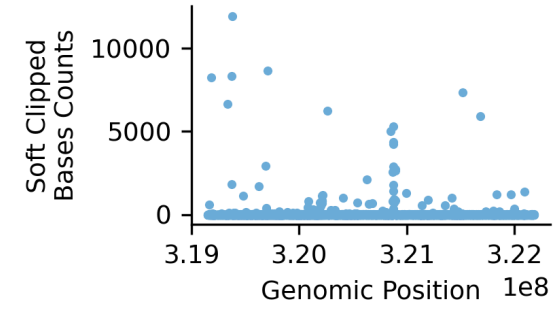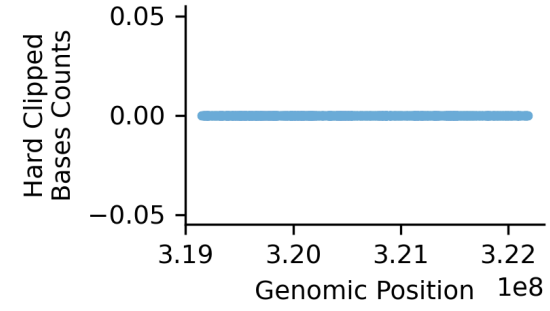

● SUPER\_1

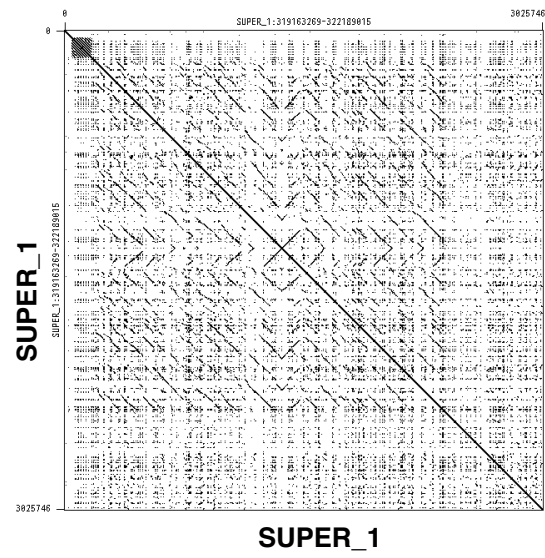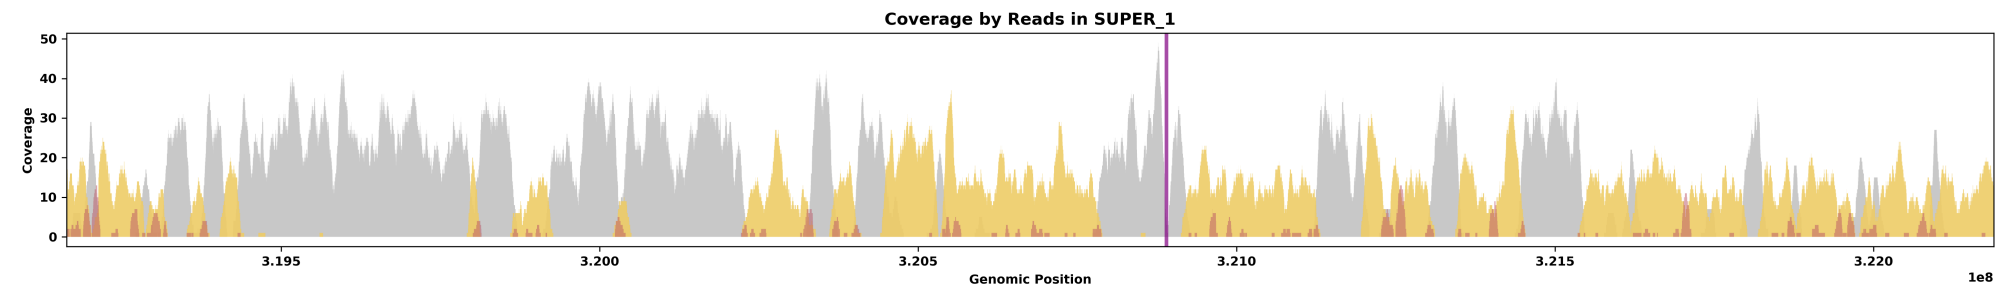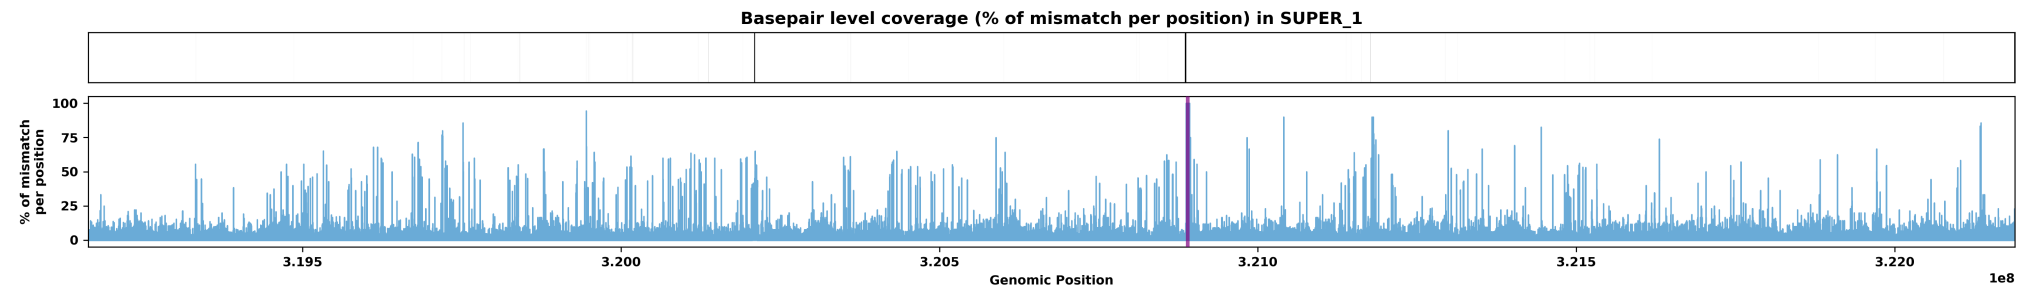

Species ID: mManPen7  
 Common Name: Chinese pangolin  
 Scientific Name: Manis pentadactyla  
 Assembly Type: Haplotype Resolved  
 Data Source: VGP

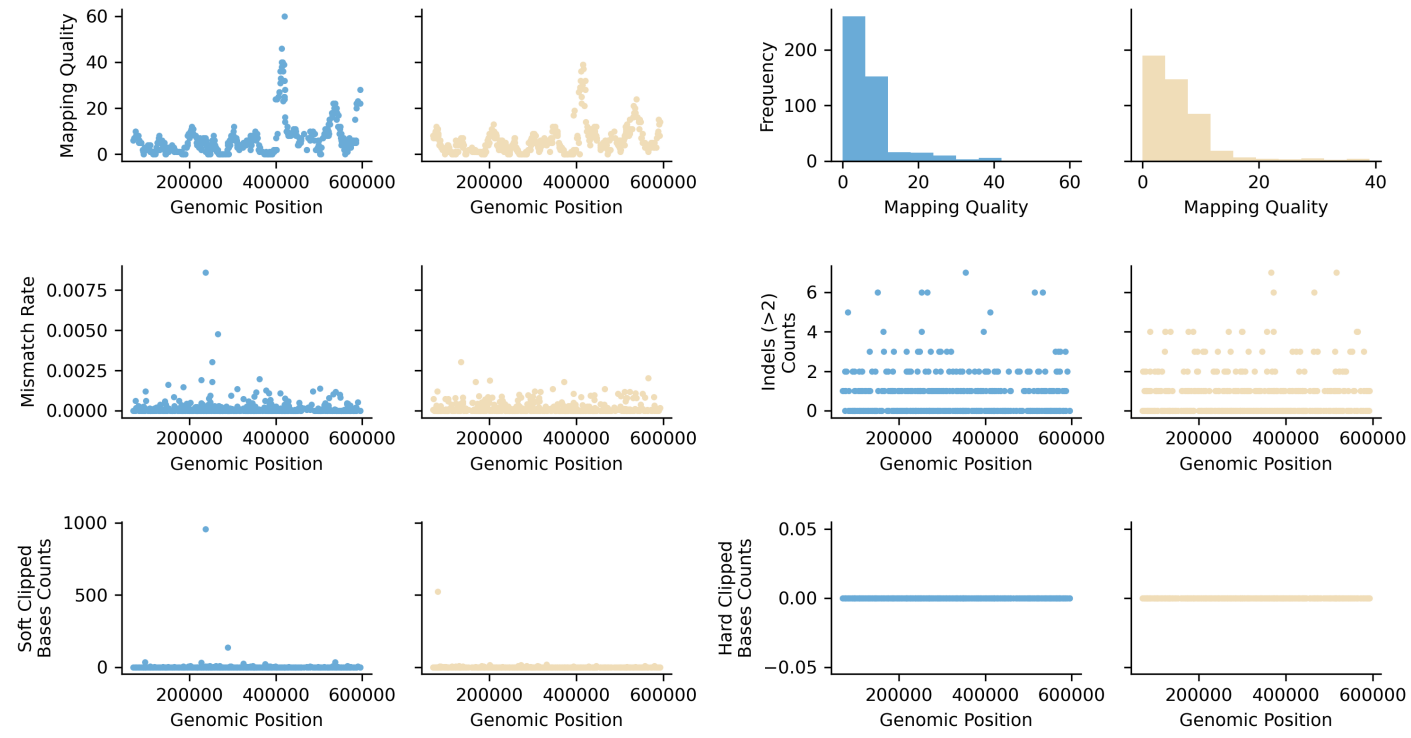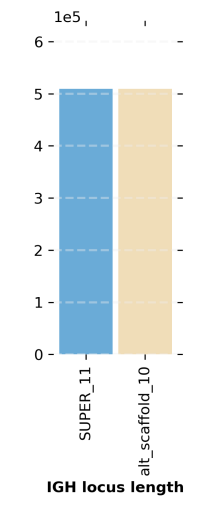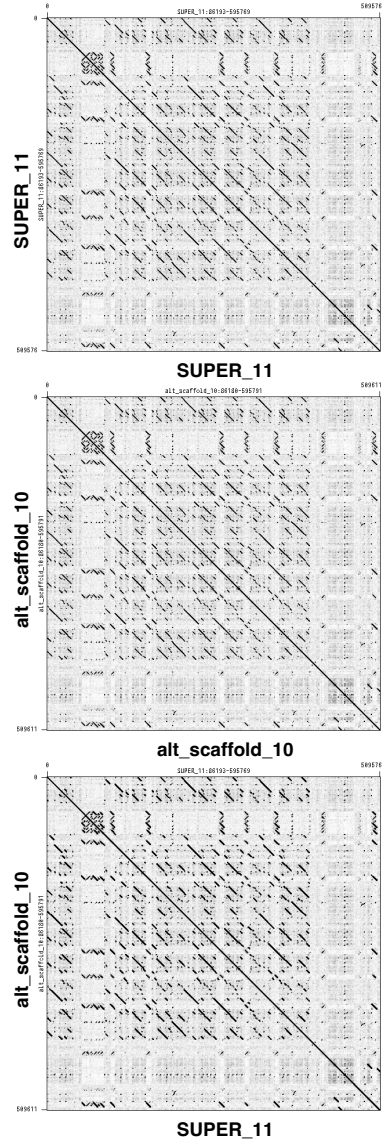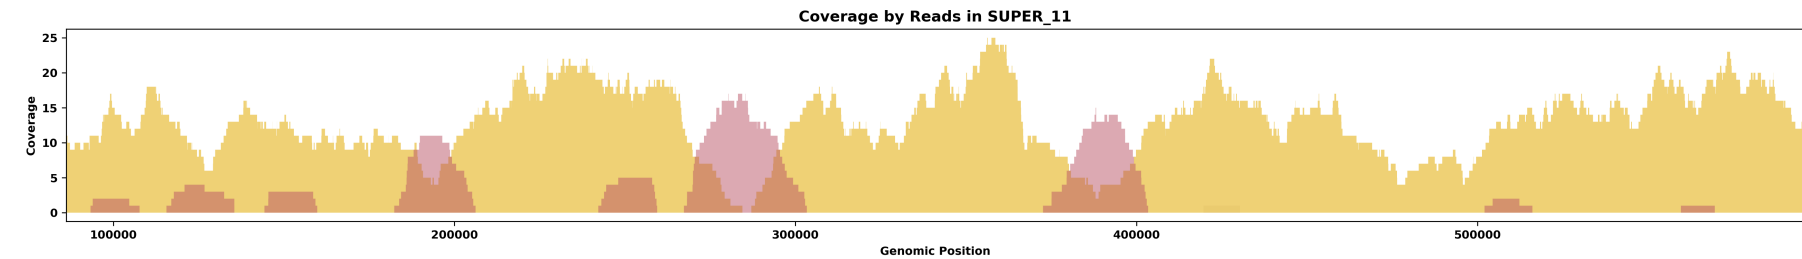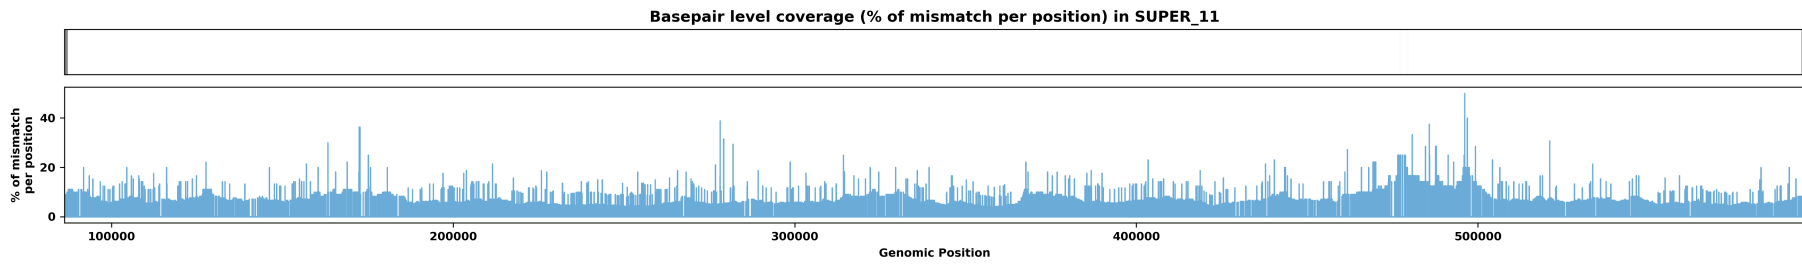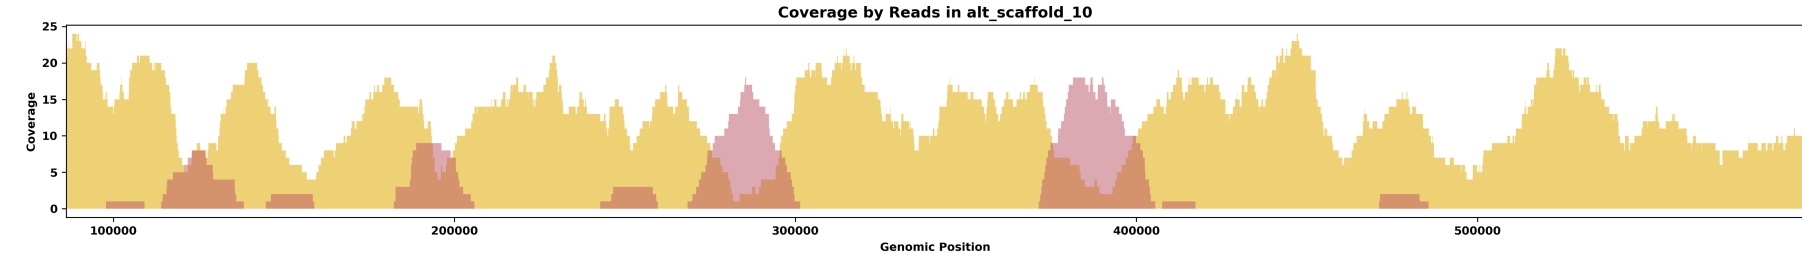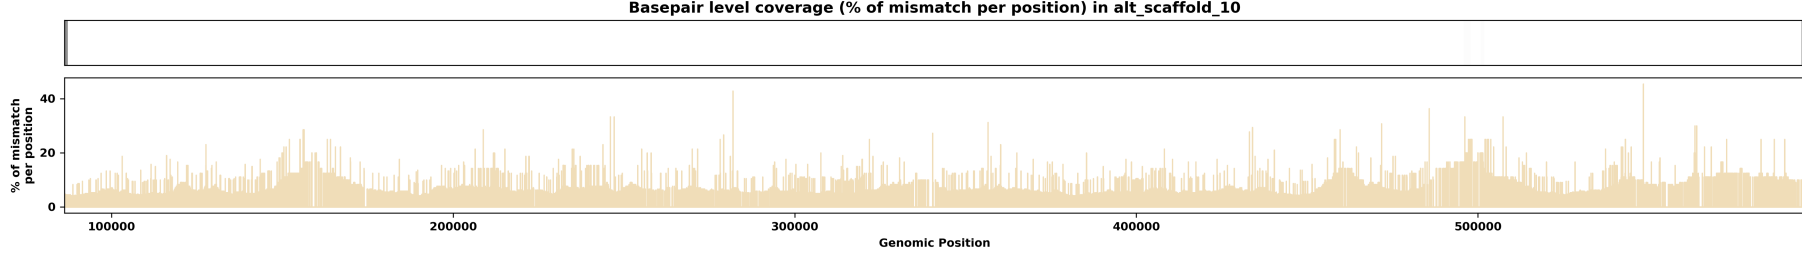

Species ID: mMarMar1

Common Name: European pine marten

Scientific Name: Martes martes

Assembly Type: Not Haplotype Resolved

Data Source: VGP

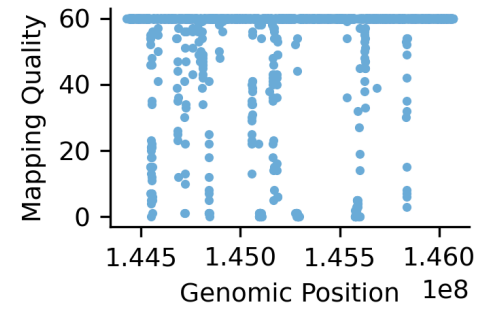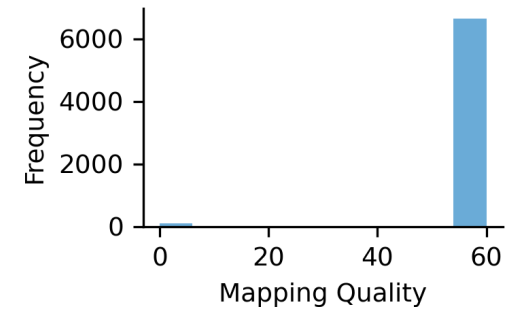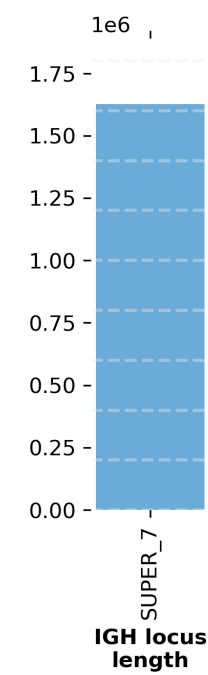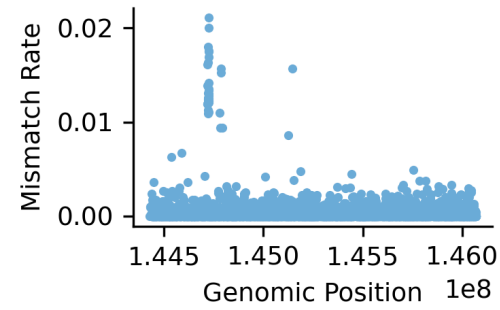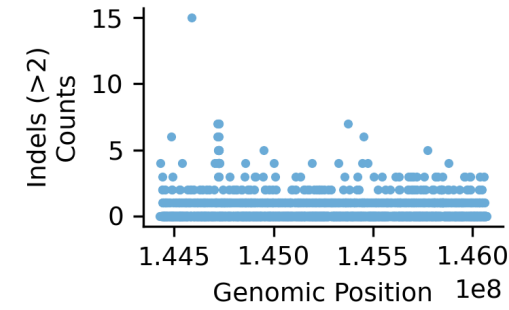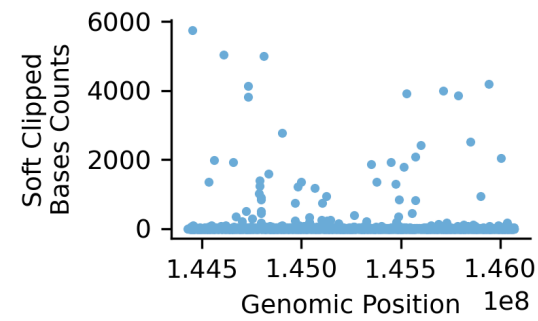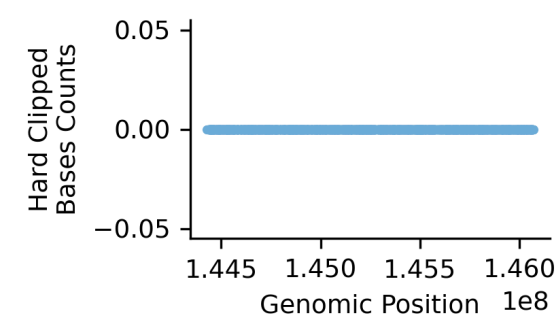

● SUPER\_7

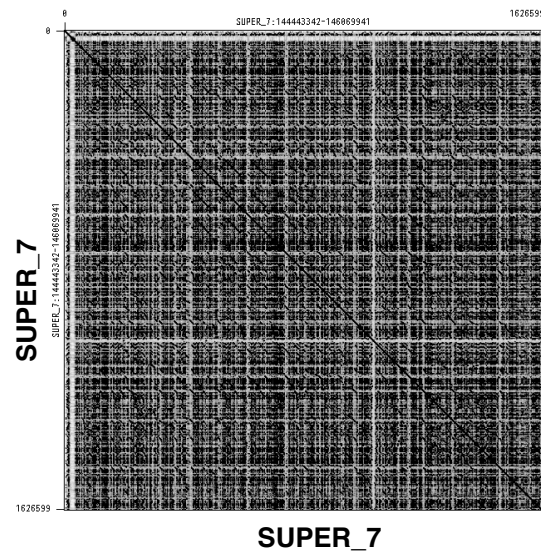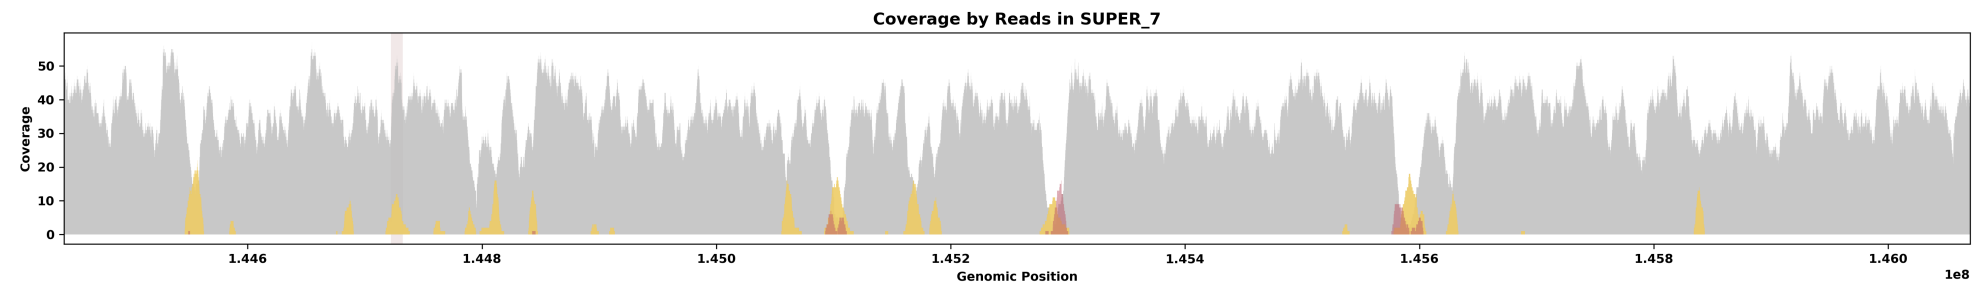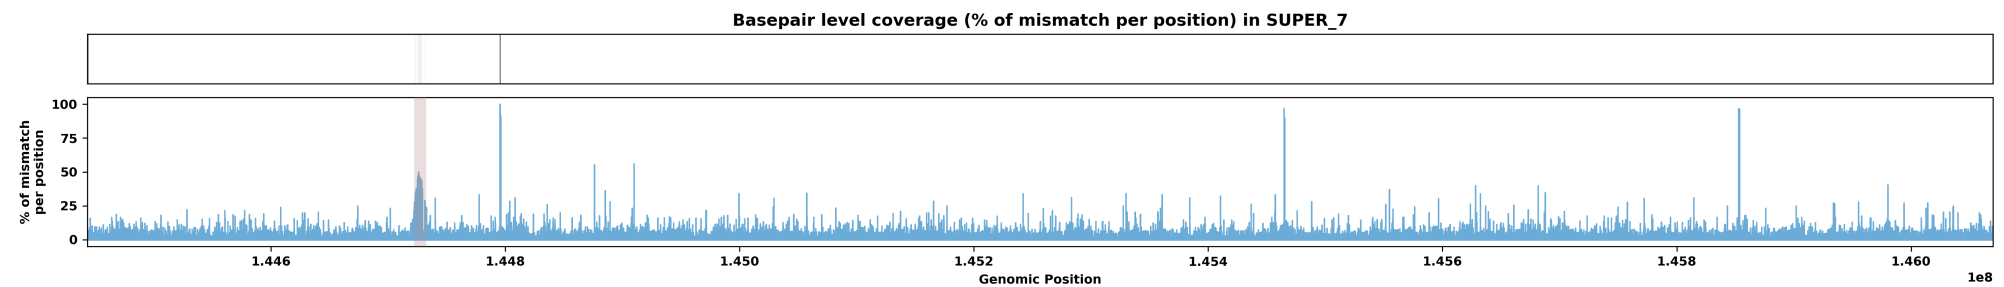

Species ID: mMe1Me13  
 Common Name: European badger  
 Scientific Name: Meles meles  
 Assembly Type: Haplotype Resolved  
 Data Source: VGP

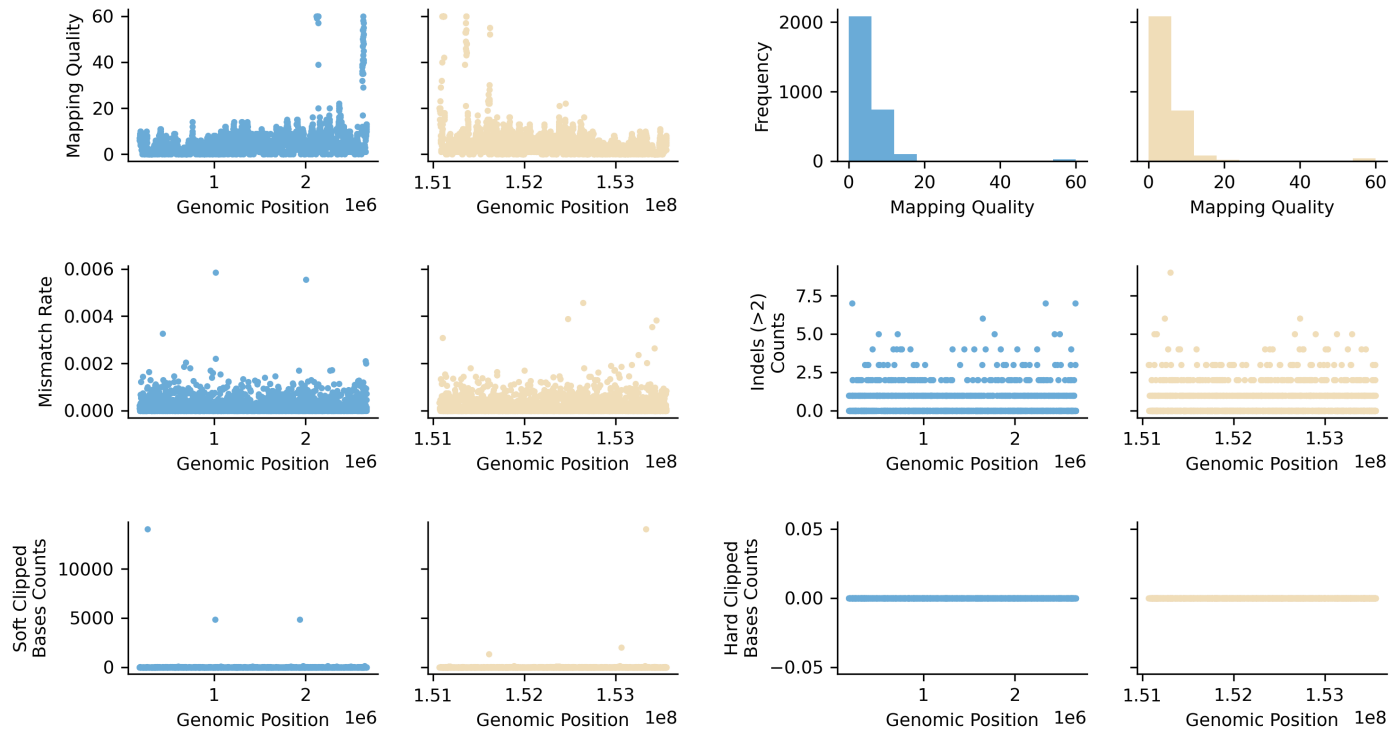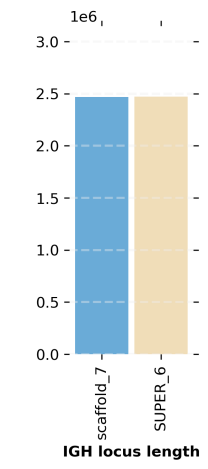

● scaffold\_7  
 ● SUPER\_6

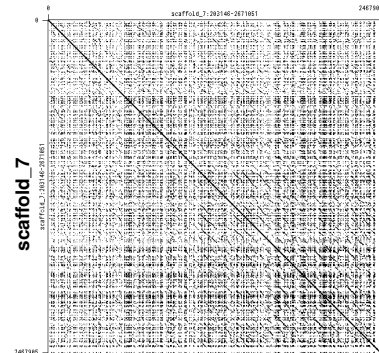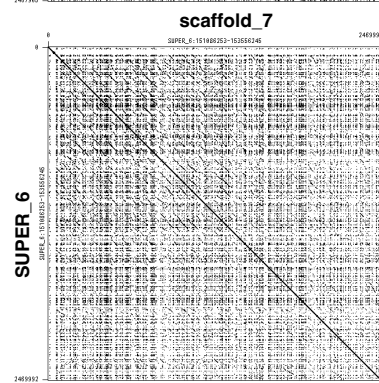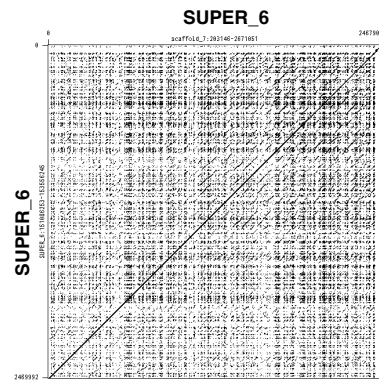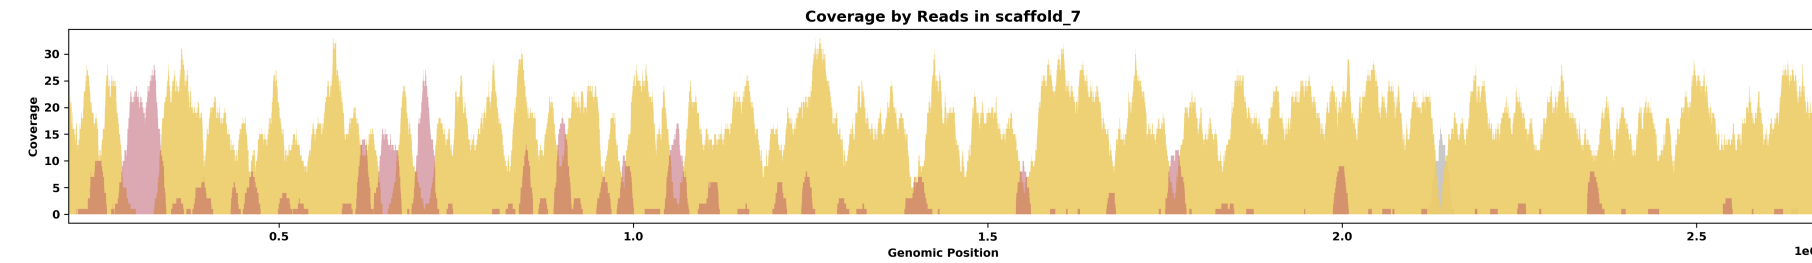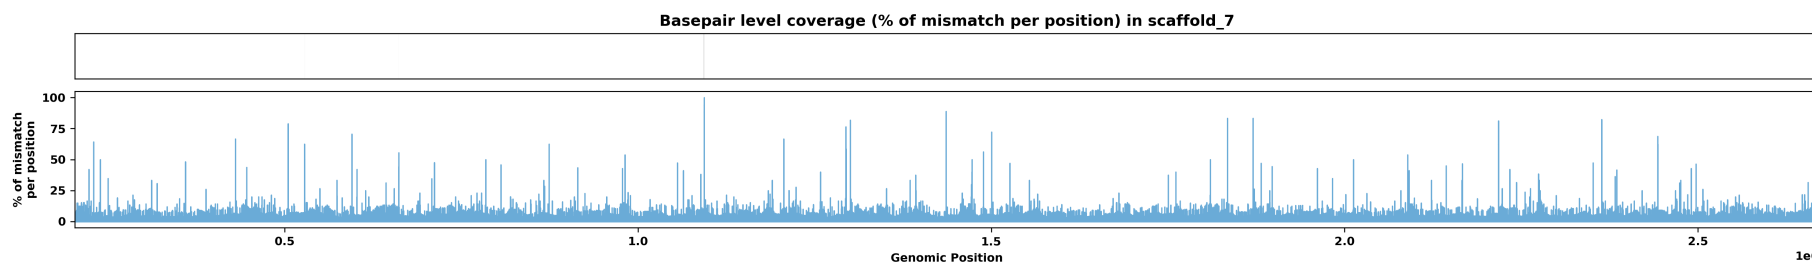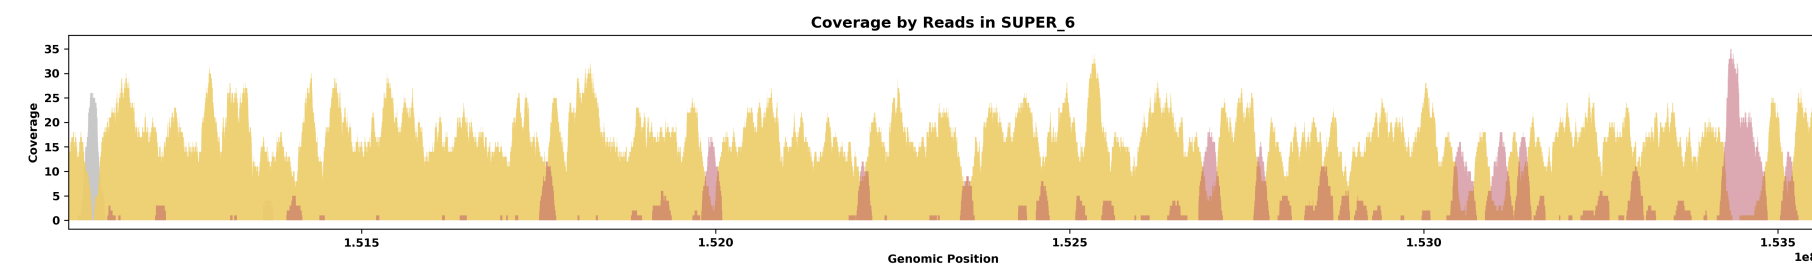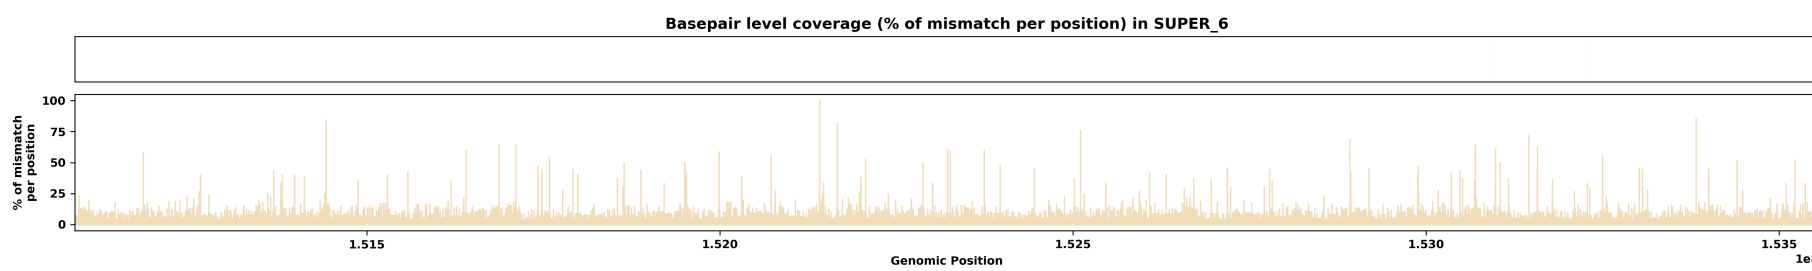

Species ID: mMesDen1  
 Common Name: Blainville's beaked whale  
 Scientific Name: Mesoplodon densirostris  
 Assembly Type: Not Haplotype Resolved  
 Data Source: VGP

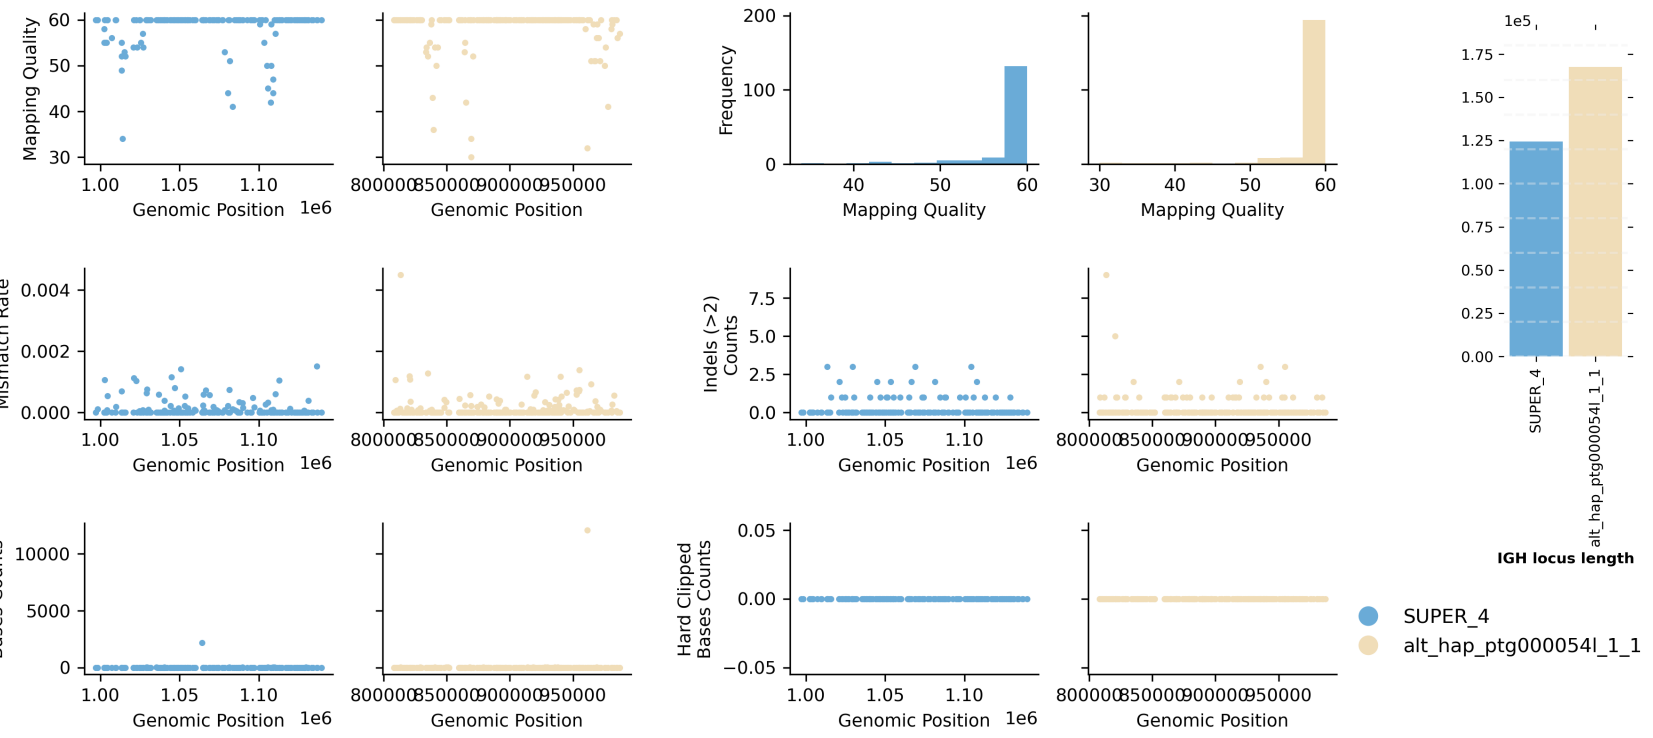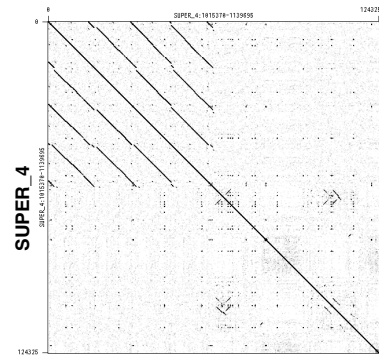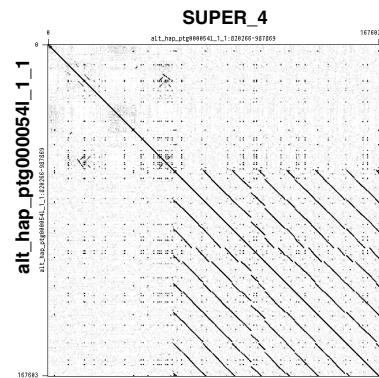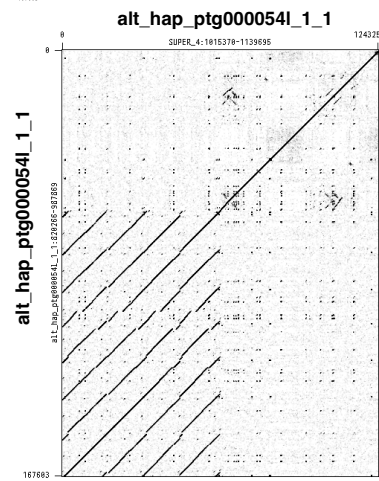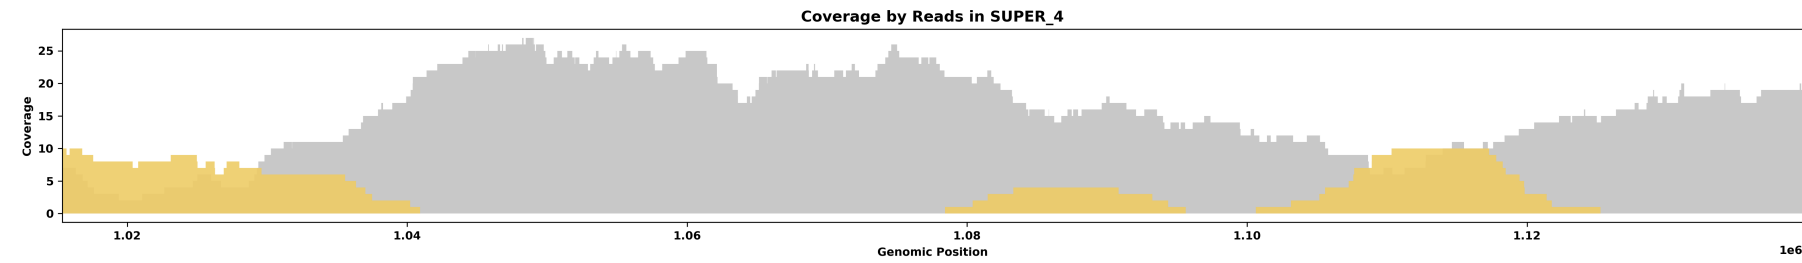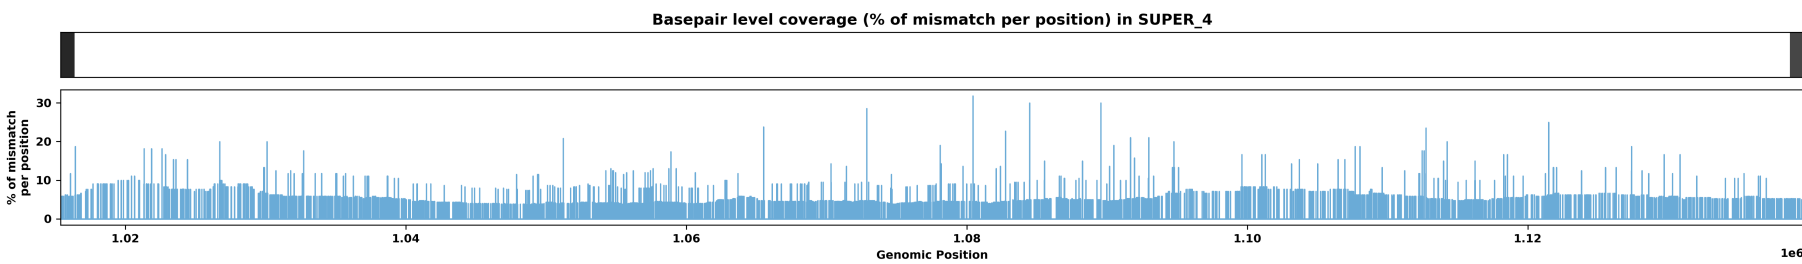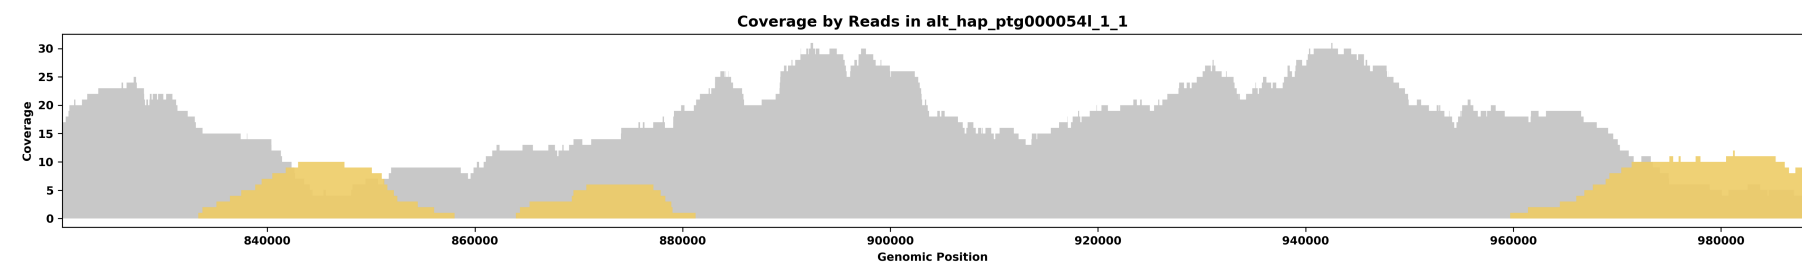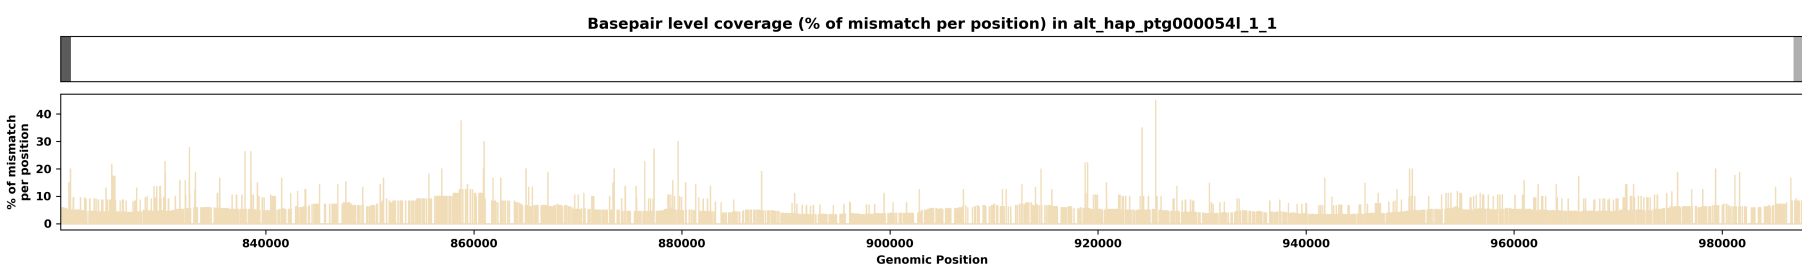

Species ID: mMicCal1  
 Common Name: California Vole  
 Scientific Name: *Microtus californicus*  
 Assembly Type: Haplotype Resolved  
 Data Source: CCGP

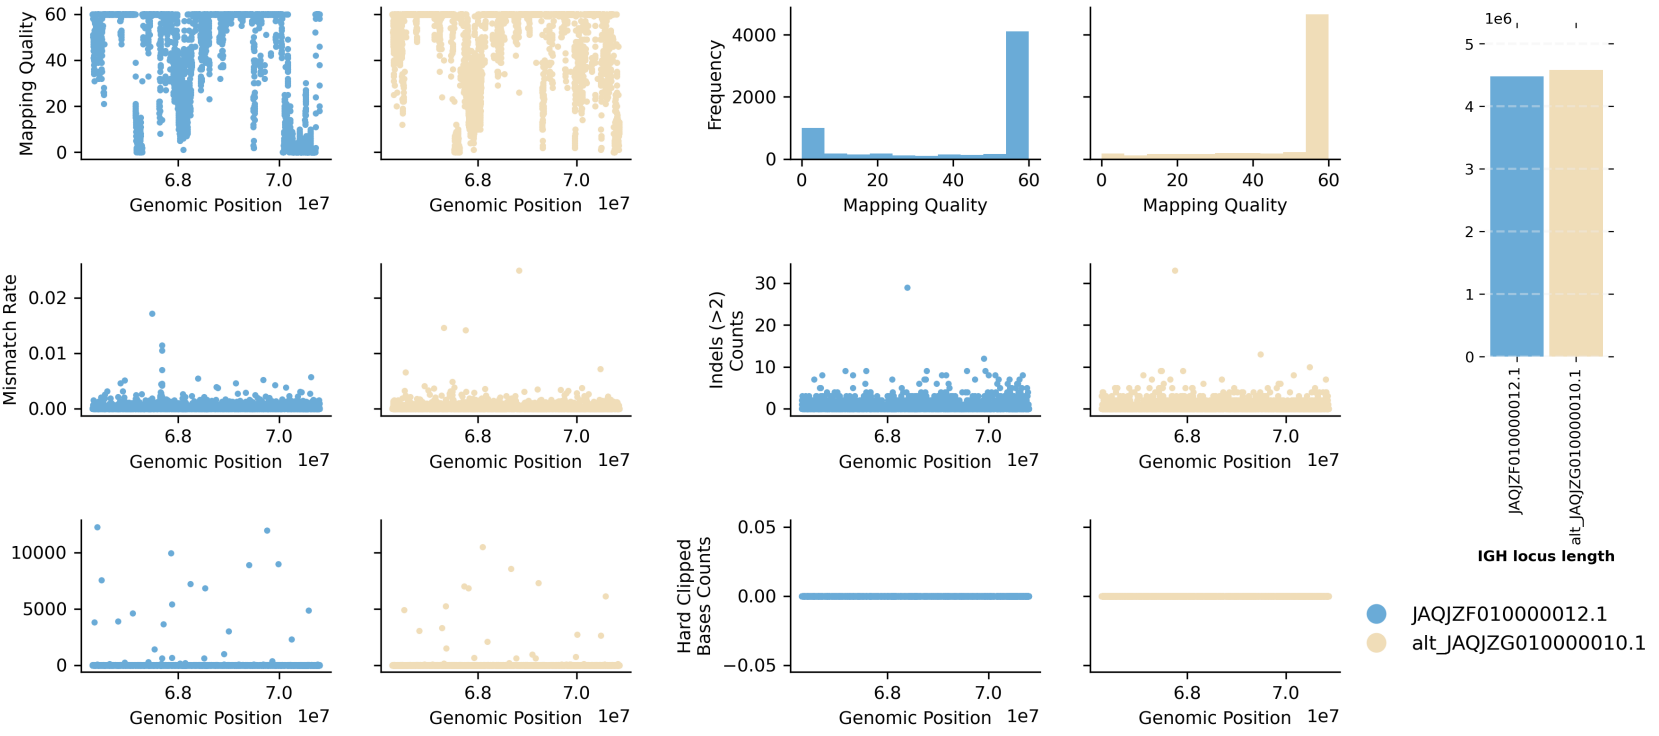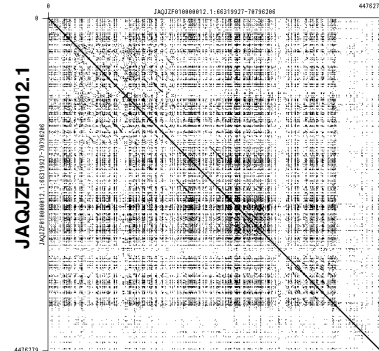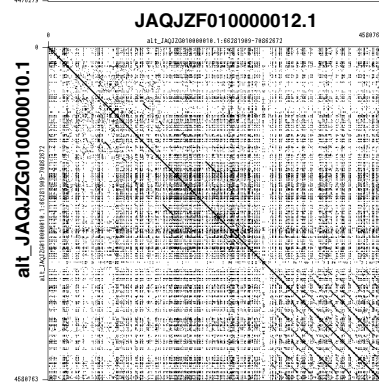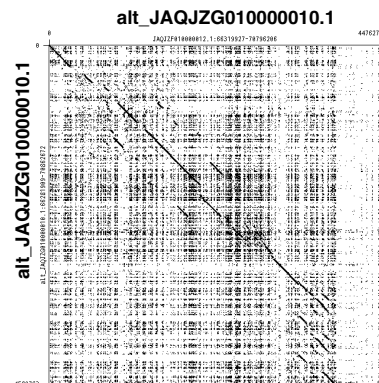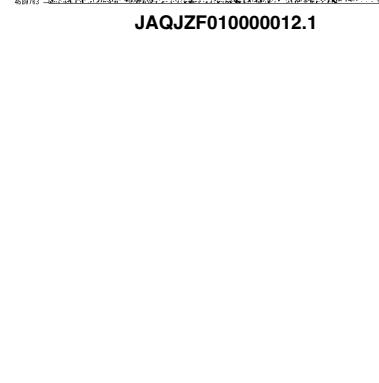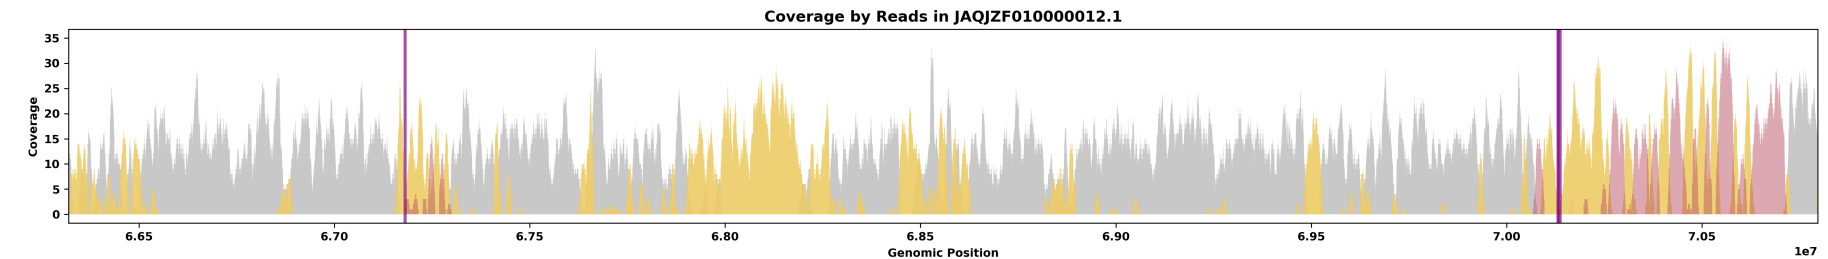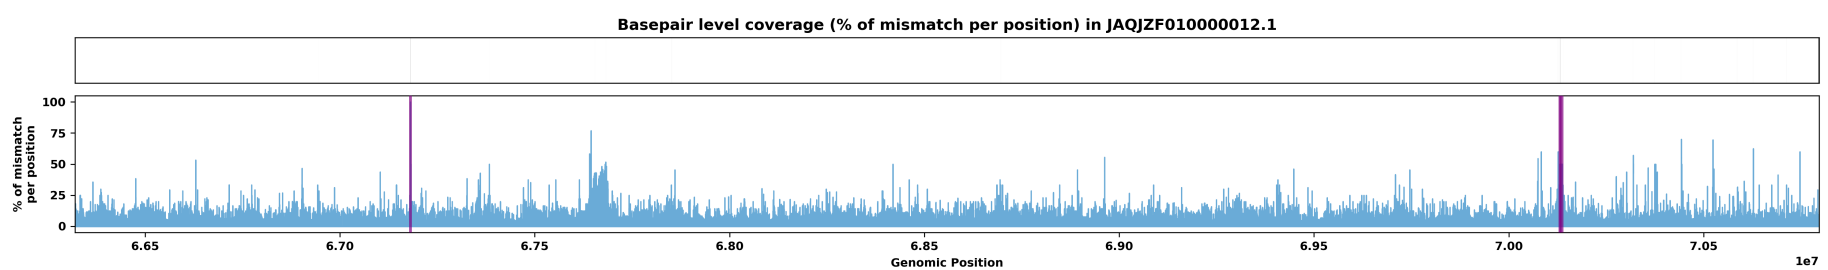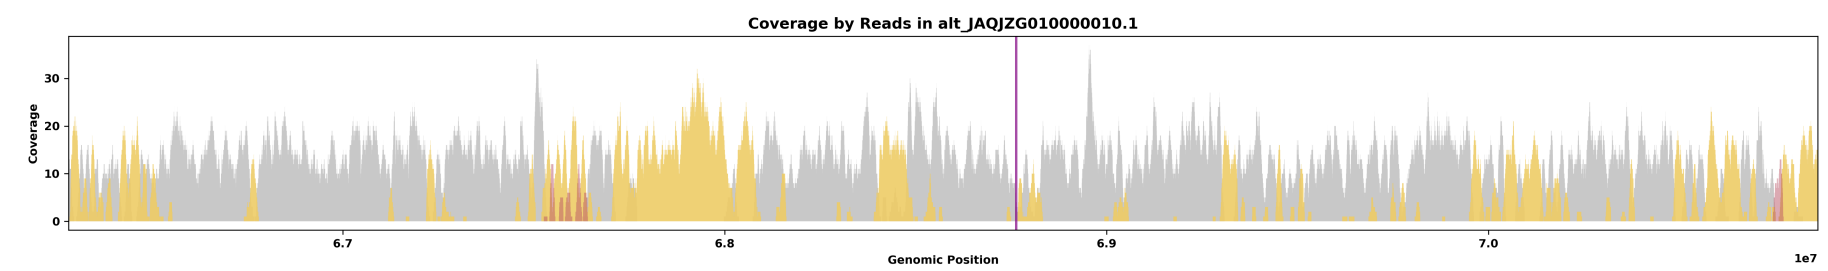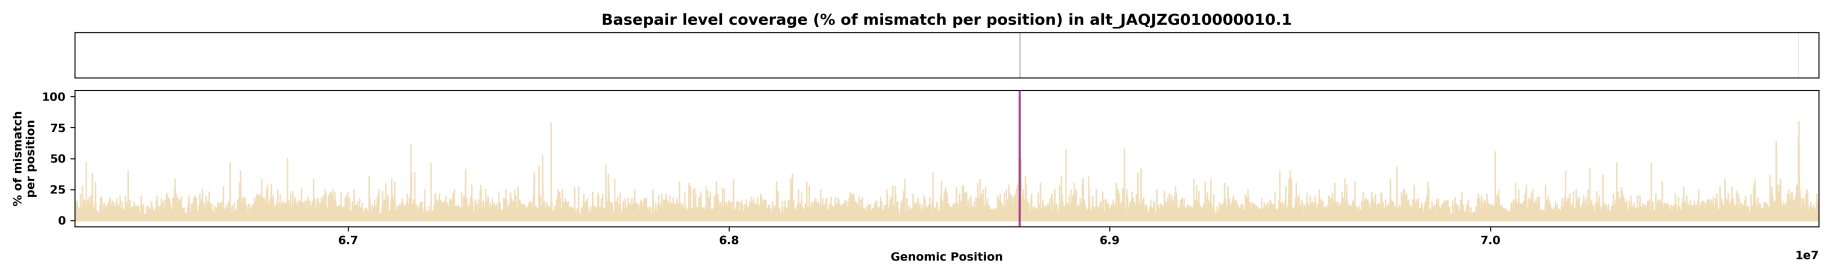

MapQ = 60  
 MapQ = 1-59  
 MapQ = 0

MapQ = 60  
 MapQ = 1-59  
 MapQ = 0

Species ID: mMicMin1

Common Name: European harvest mouse

Scientific Name: *Micromys minutus*

Assembly Type: Not Haplotype Resolved

Data Source: VGP

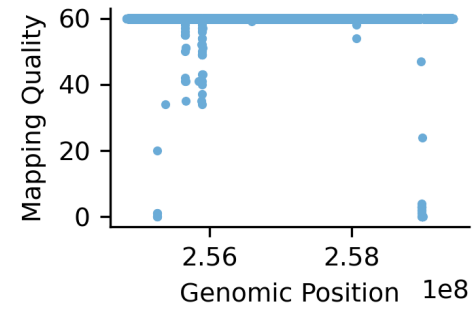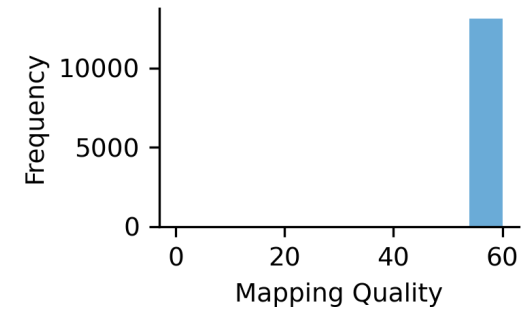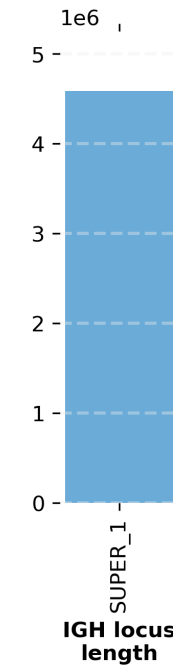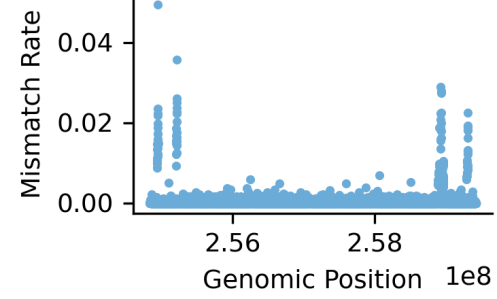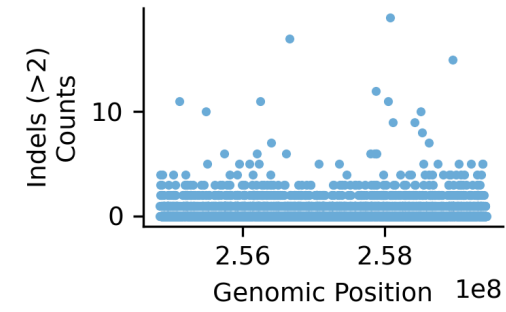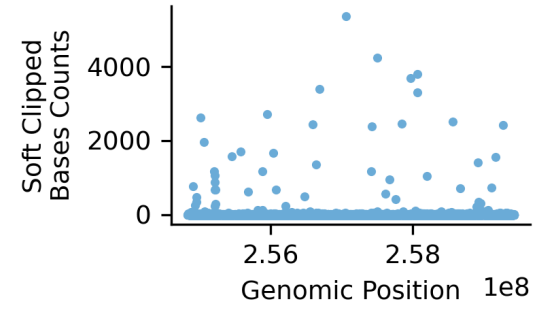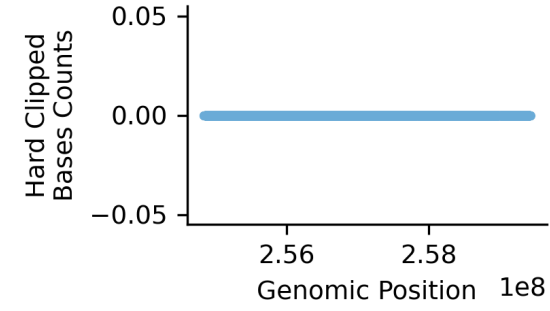

● SUPER\_1

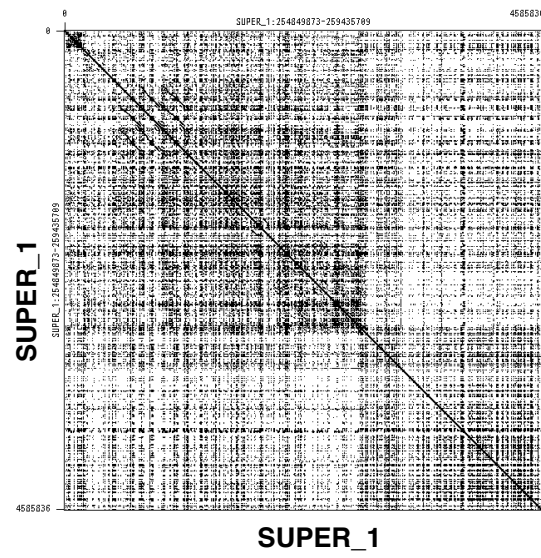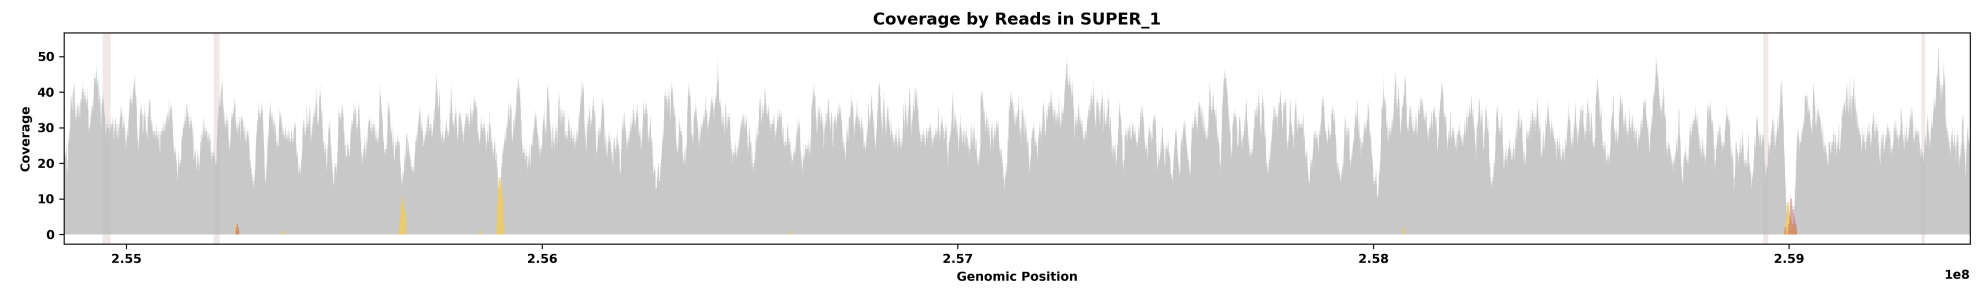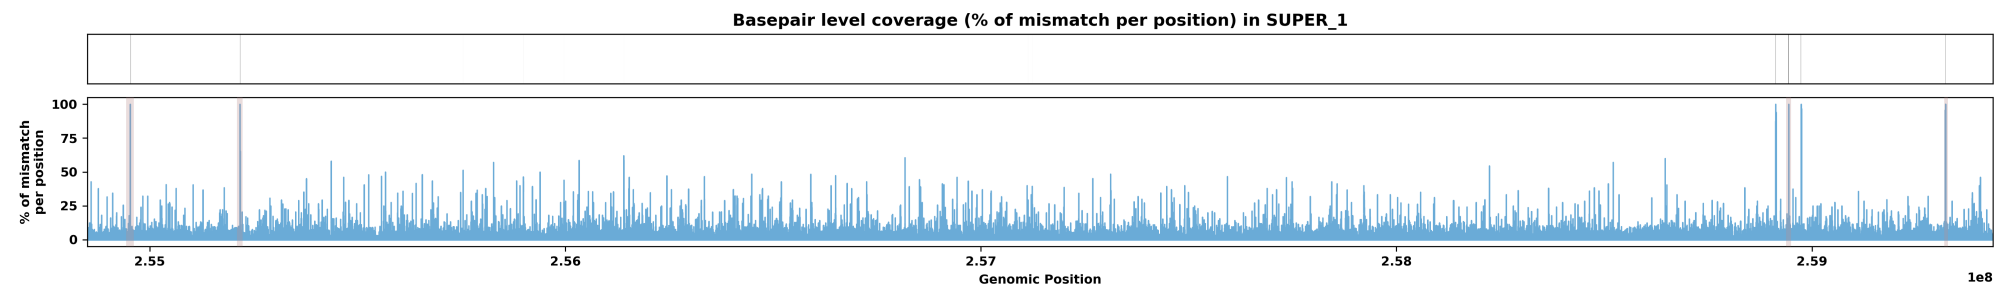

Species ID: mMirAng1  
 Common Name: Northern Elephant Seal  
 Scientific Name: *Mirounga angustirostris*  
 Assembly Type: Haplotype Resolved  
 Data Source: CCGP

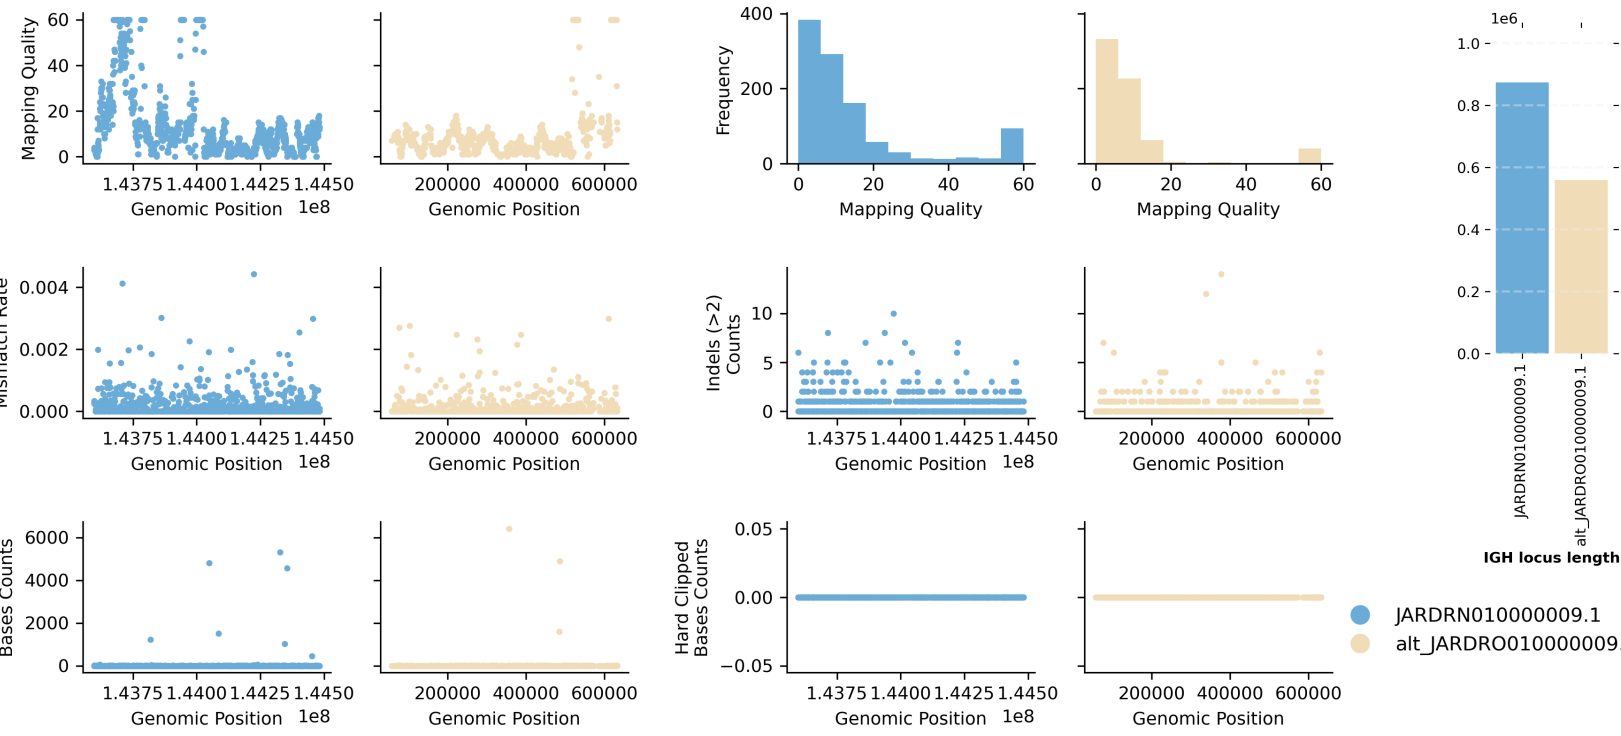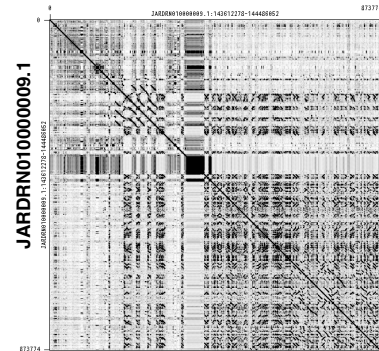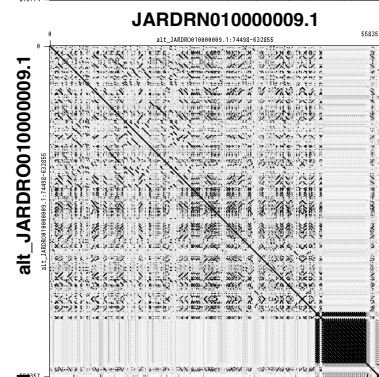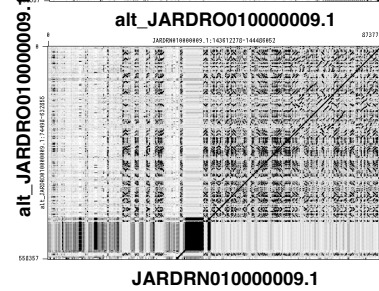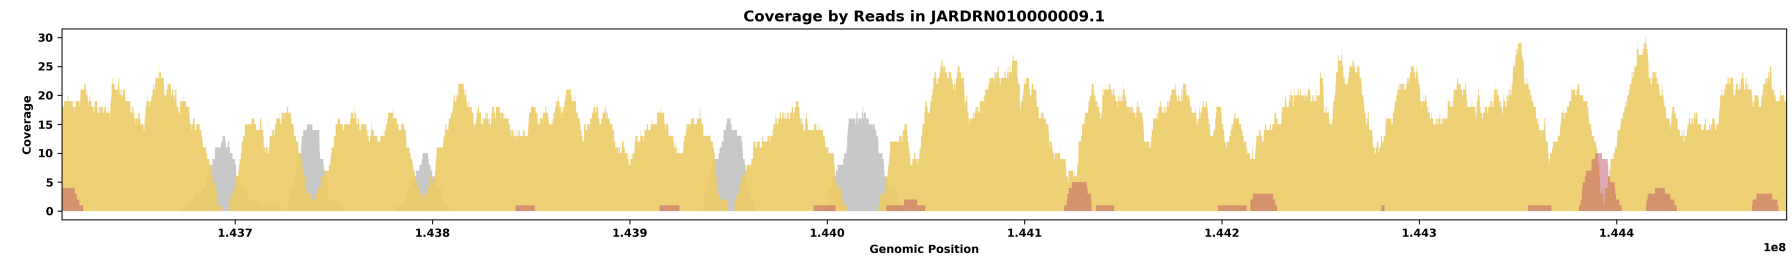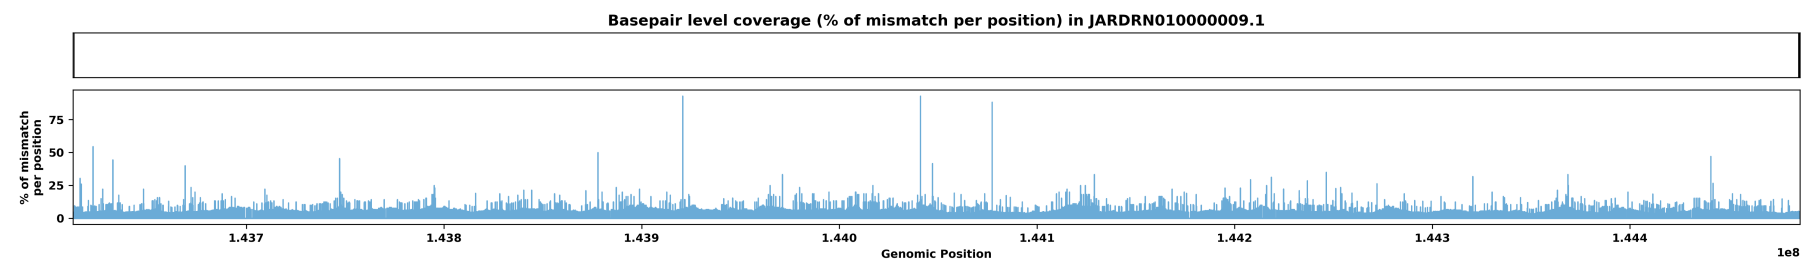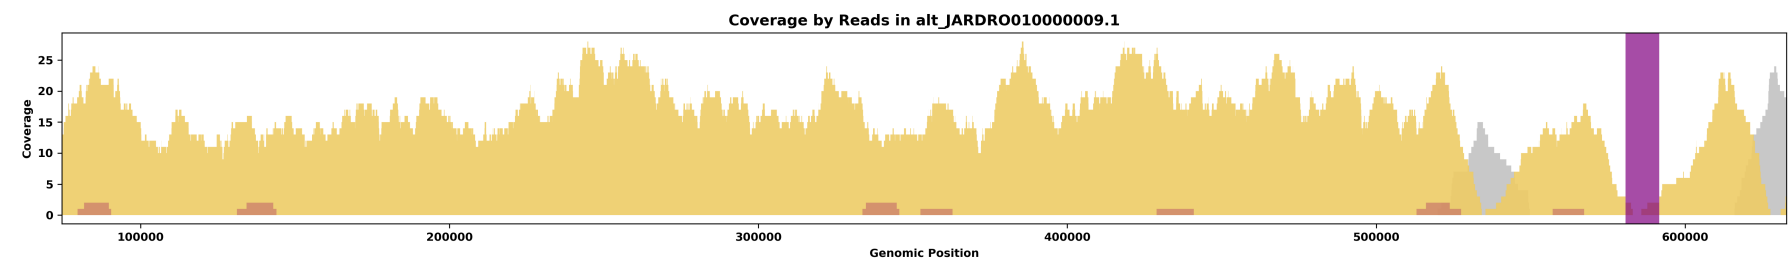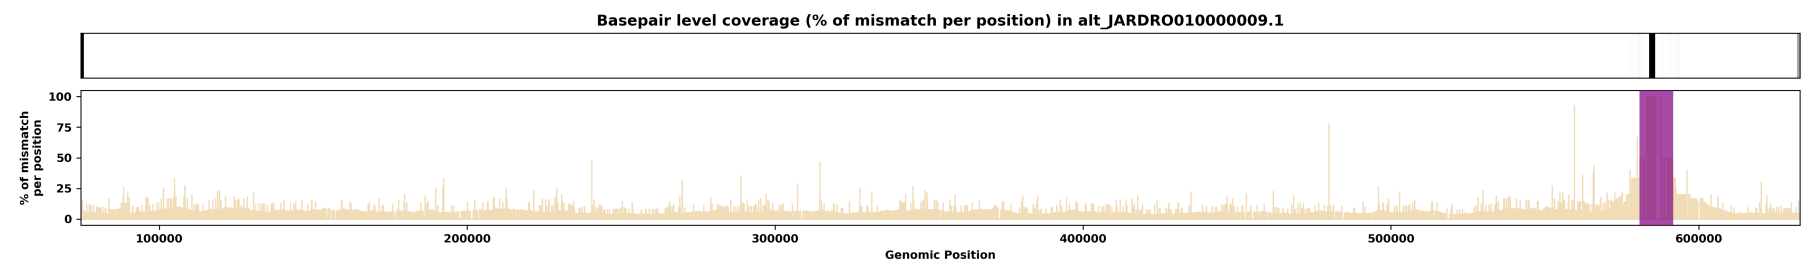



Species ID: mMonDom1  
 Common Name: gray short-tailed opossum  
 Scientific Name: *Monodelphis domestica*  
 Assembly Type: Not Haplotype Resolved  
 Data Source: VGP

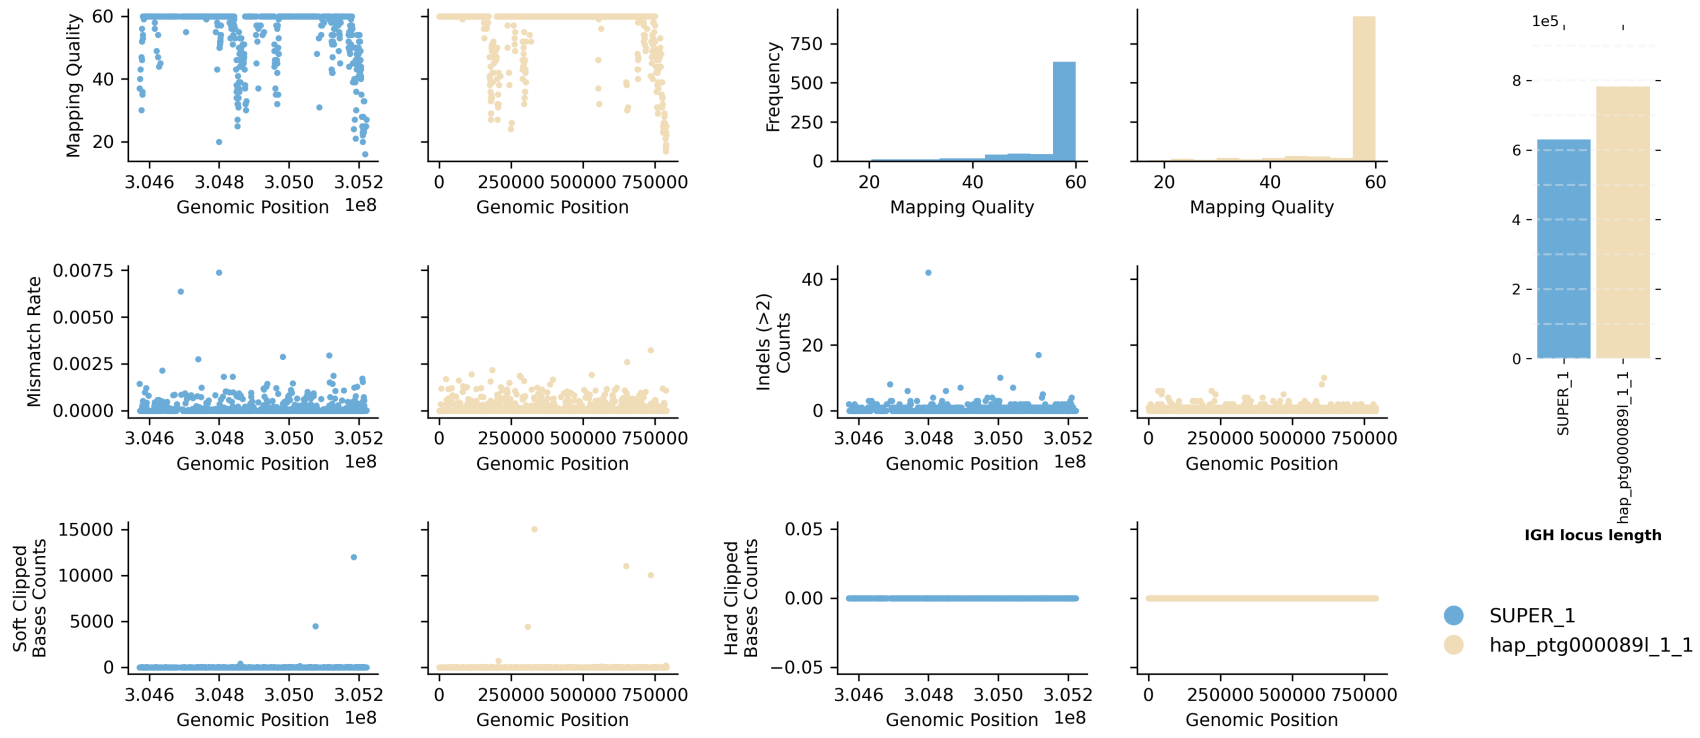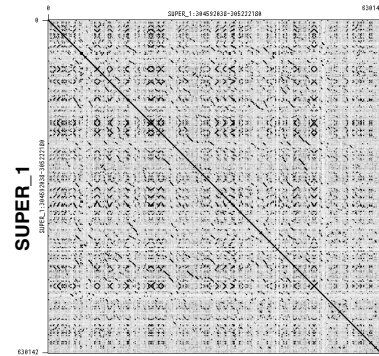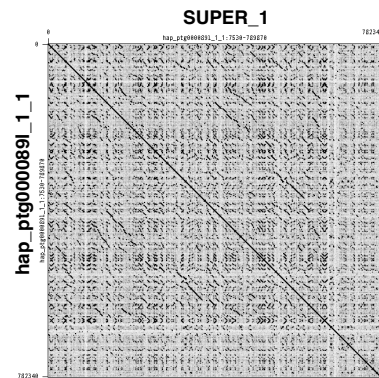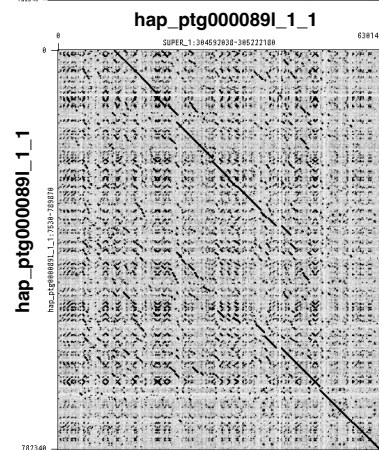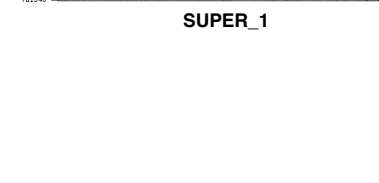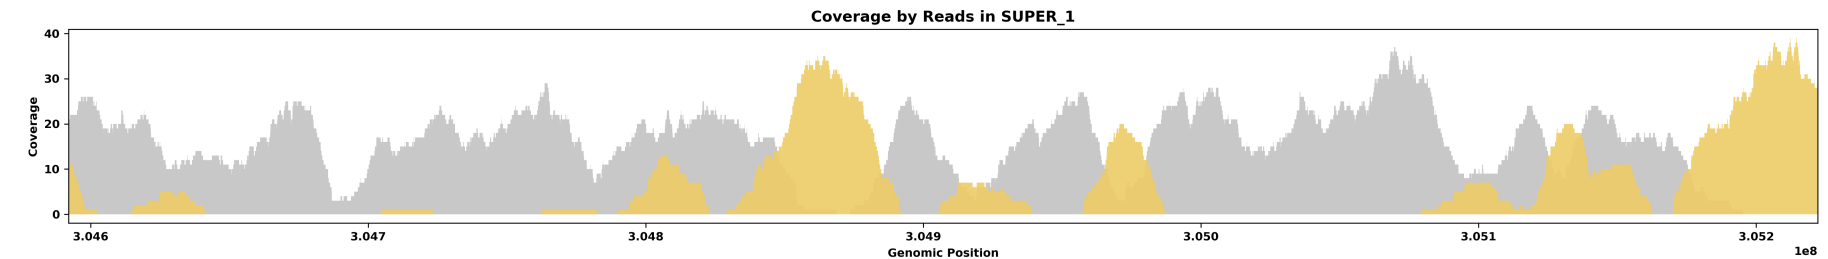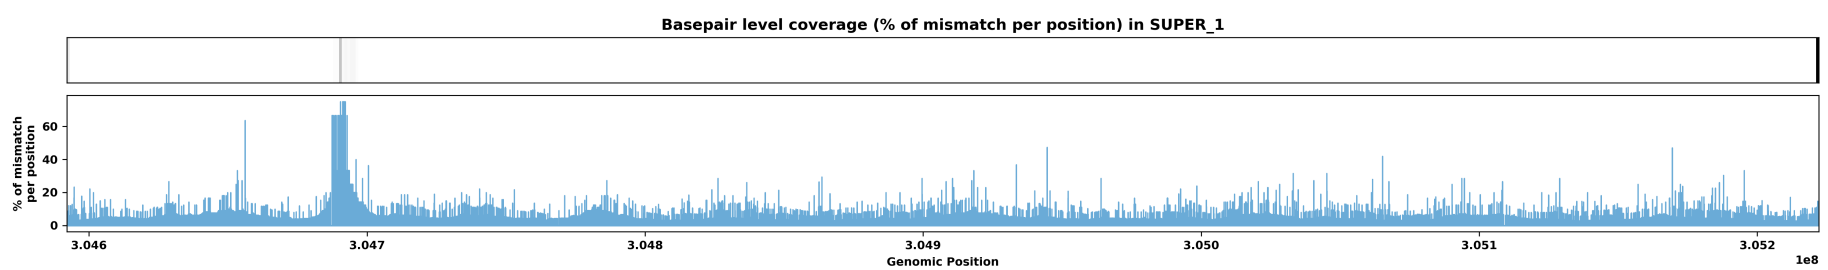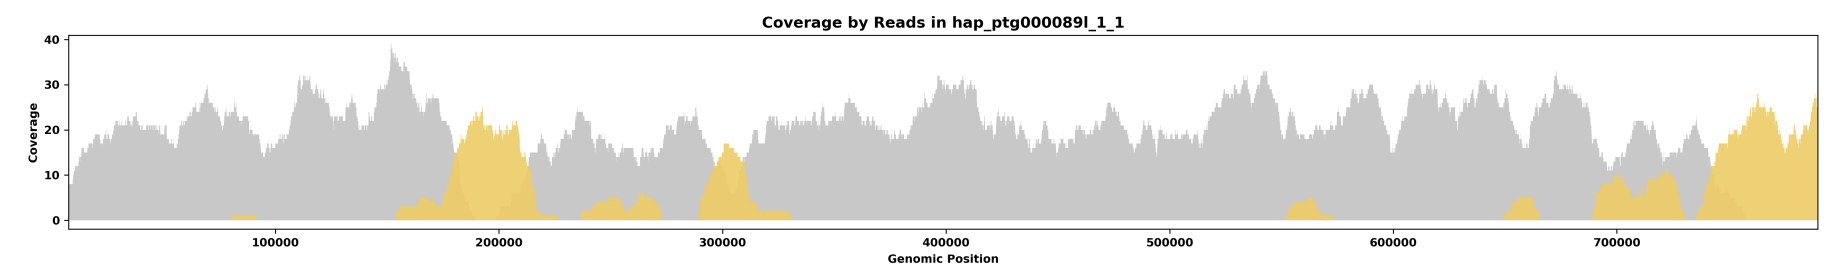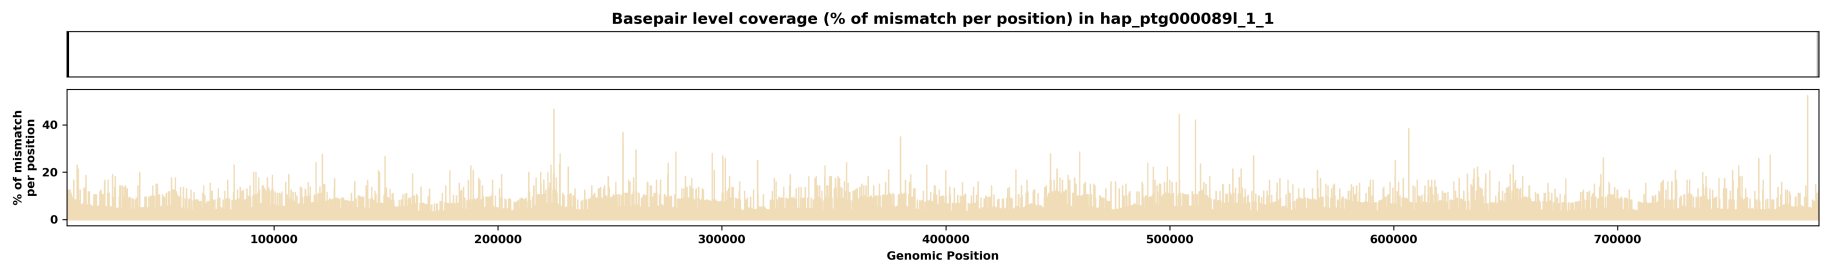

Species ID: mMunRee1  
 Common Name: Reeves' muntjac  
 Scientific Name: Muntiacus reevesi  
 Assembly Type: Not Haplotype Resolved  
 Data Source: VGP

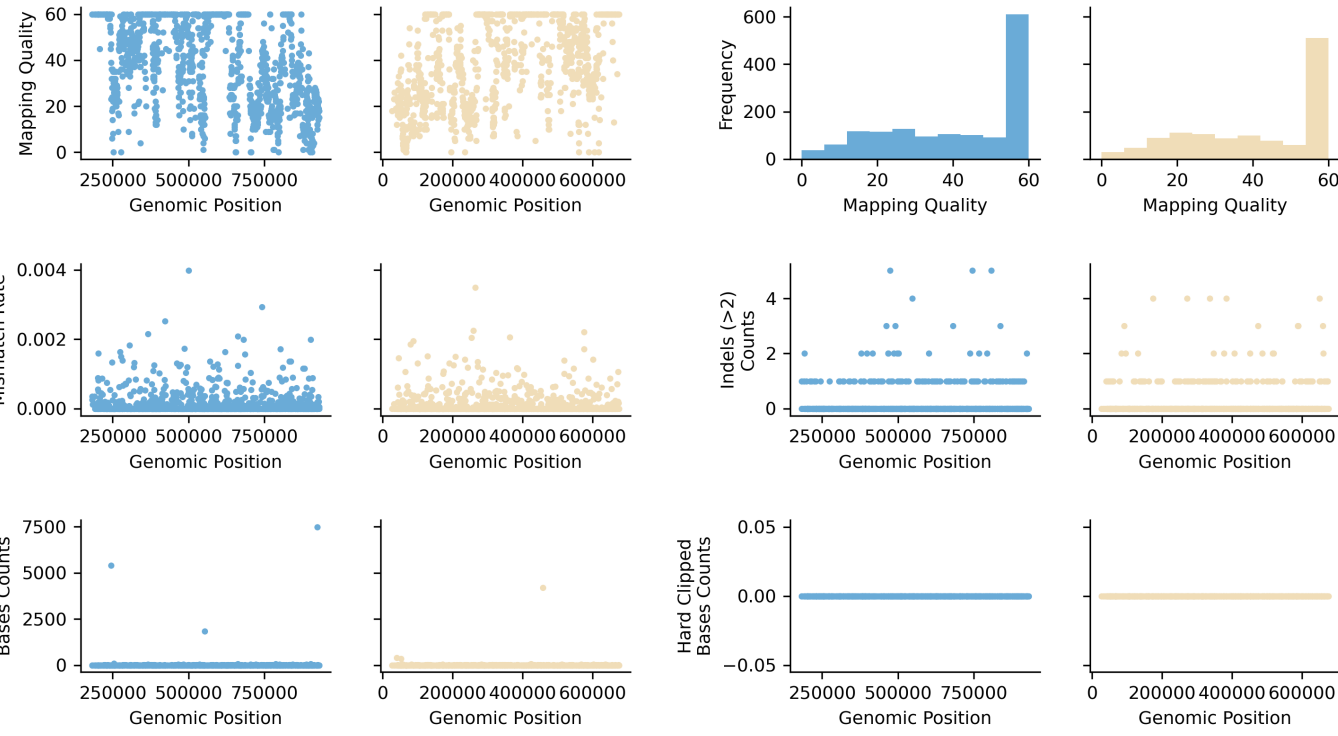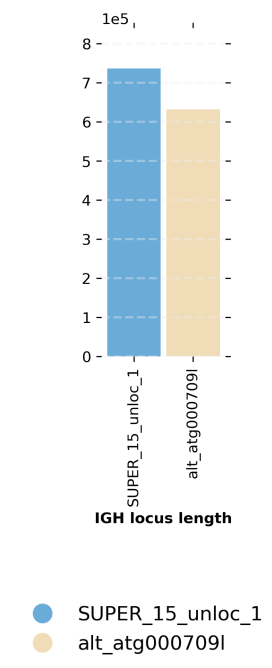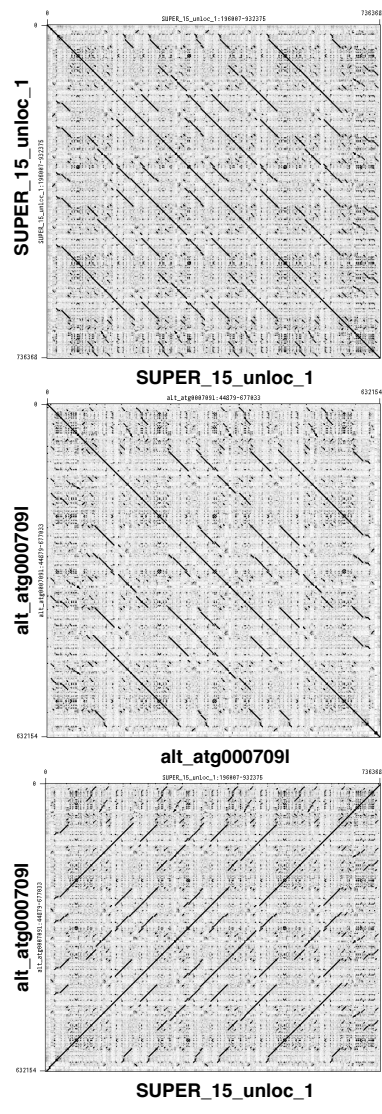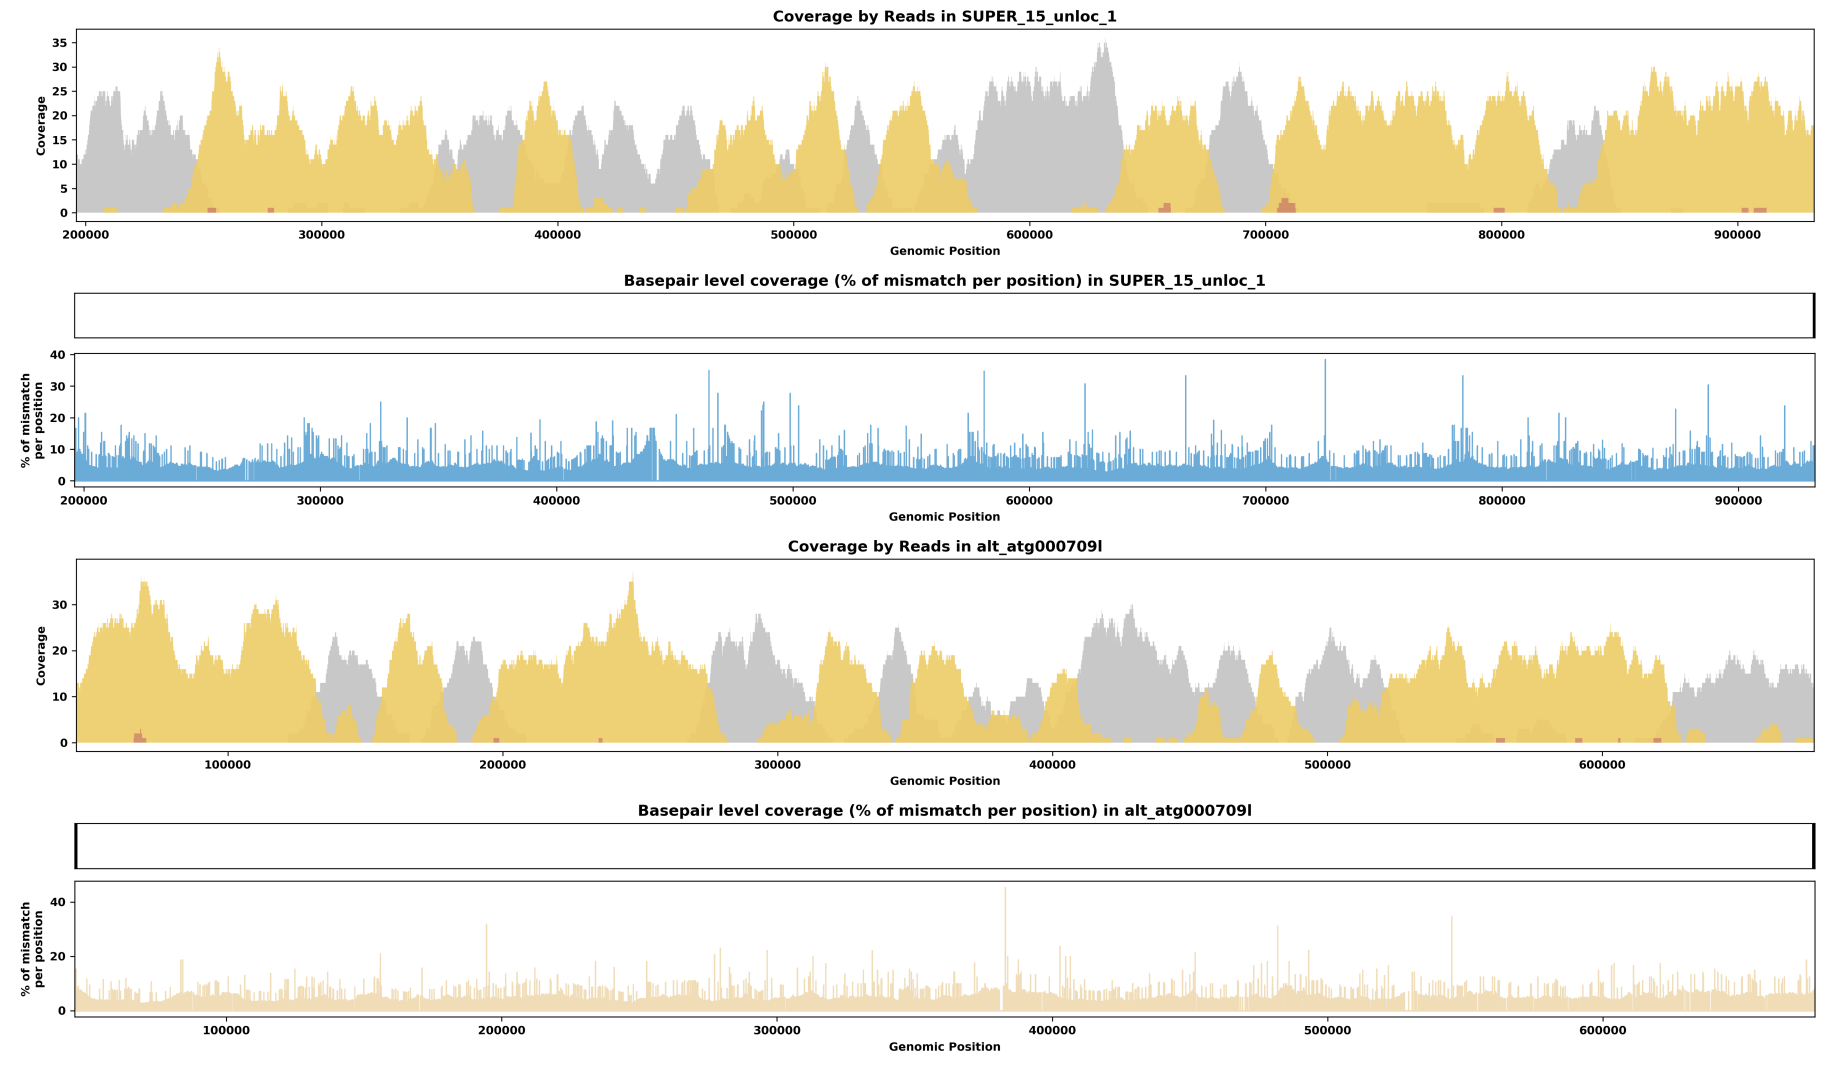

Species ID: mMusAve1

Common Name: hazel dormouse

Scientific Name: Muscardinus avellanarius

Assembly Type: Not Haplotype Resolved

Data Source: VGP

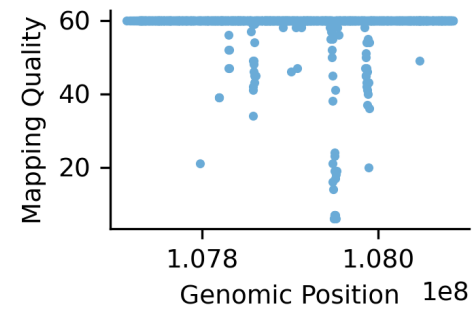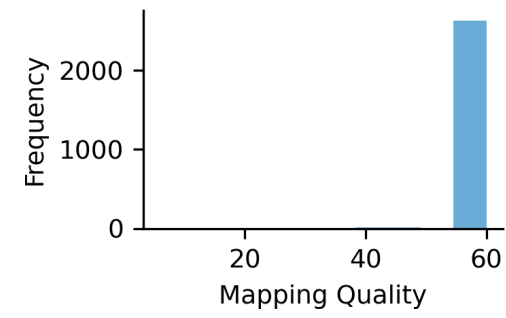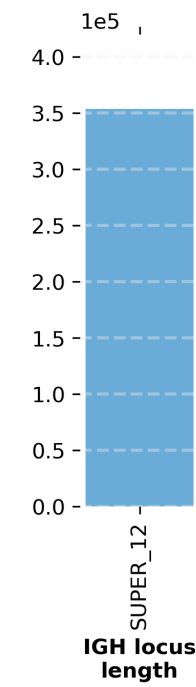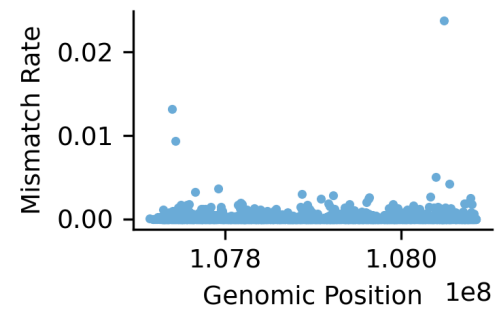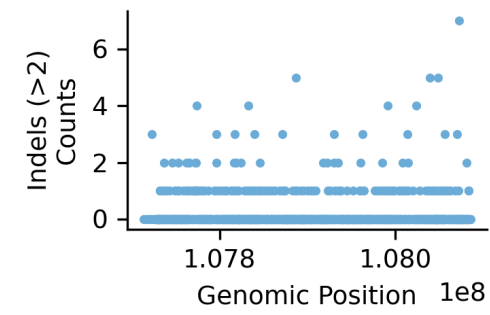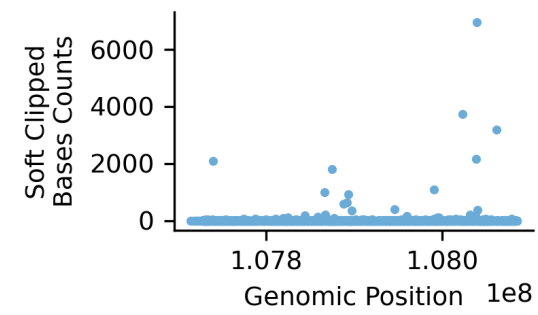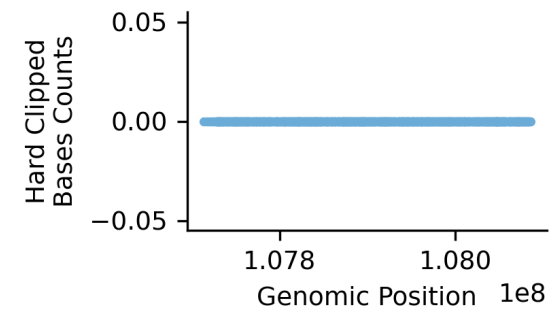

● SUPER\_12

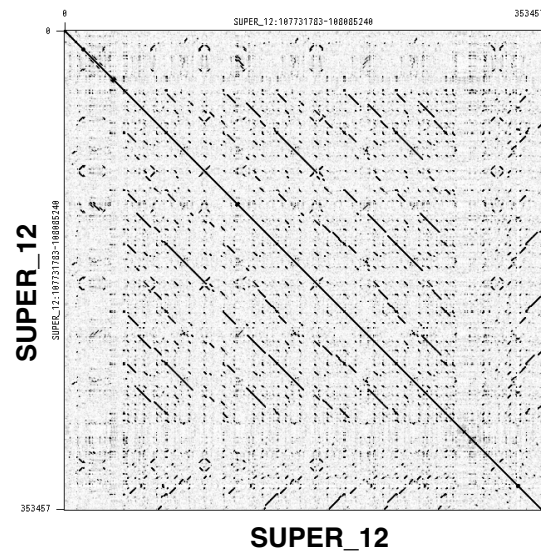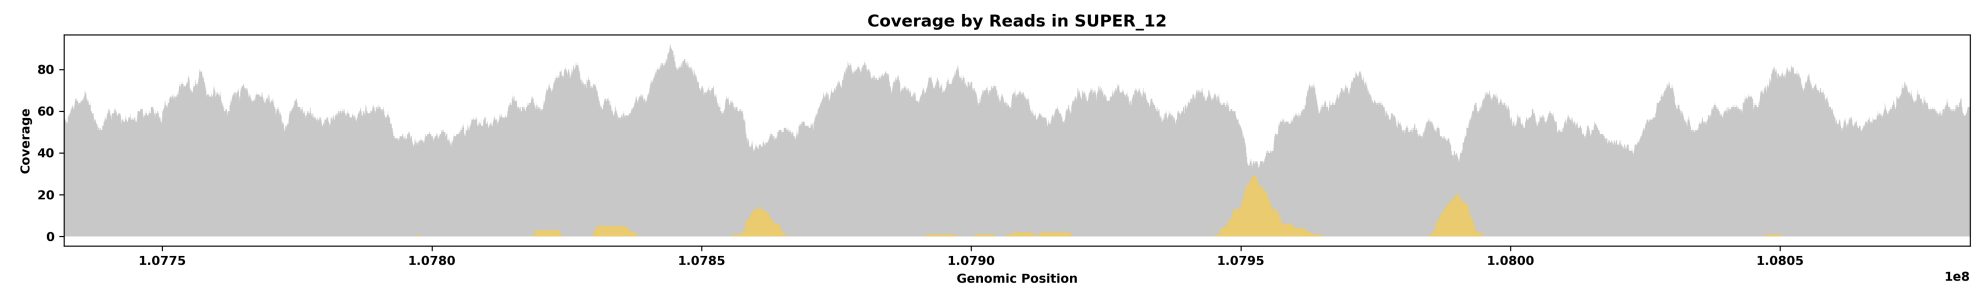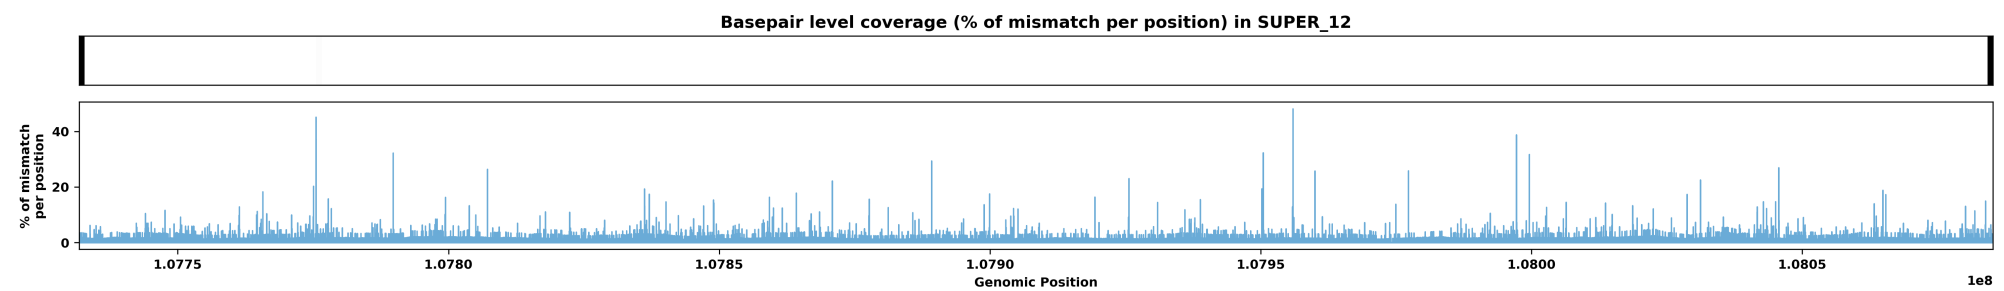

Species ID: mMusLut2  
 Common Name: European mink  
 Scientific Name: Mustela lutreola  
 Assembly Type: Not Haplotype Resolved  
 Data Source: VGP

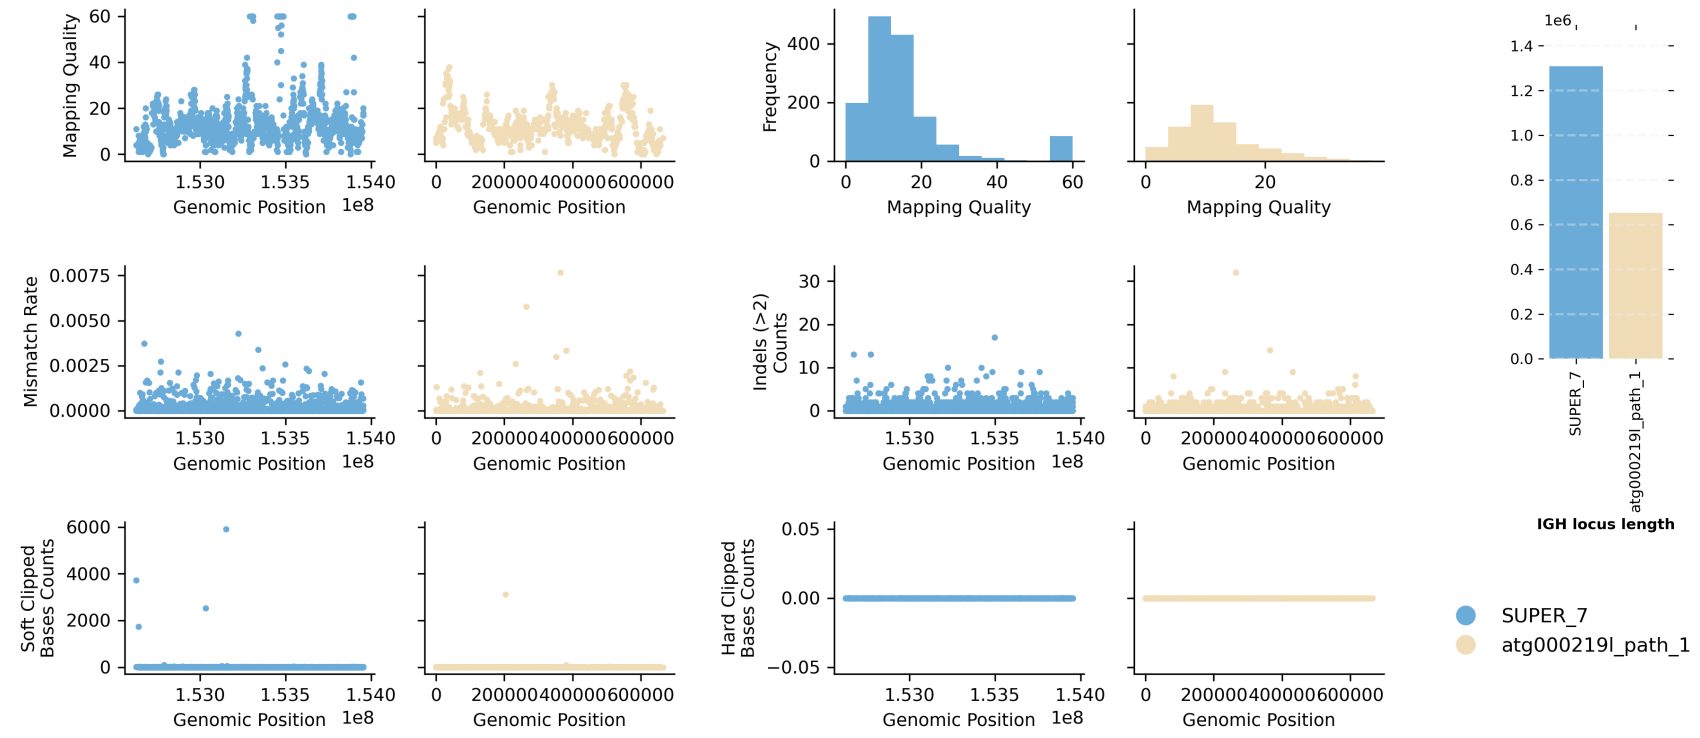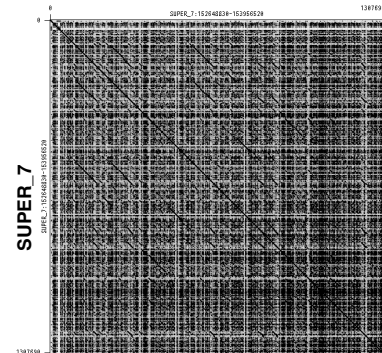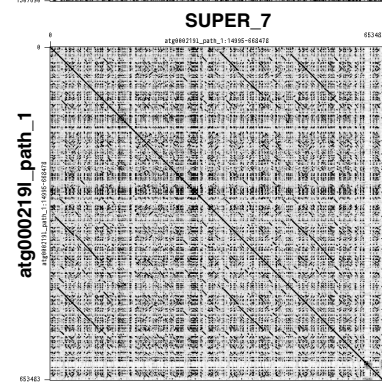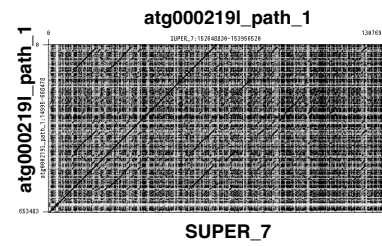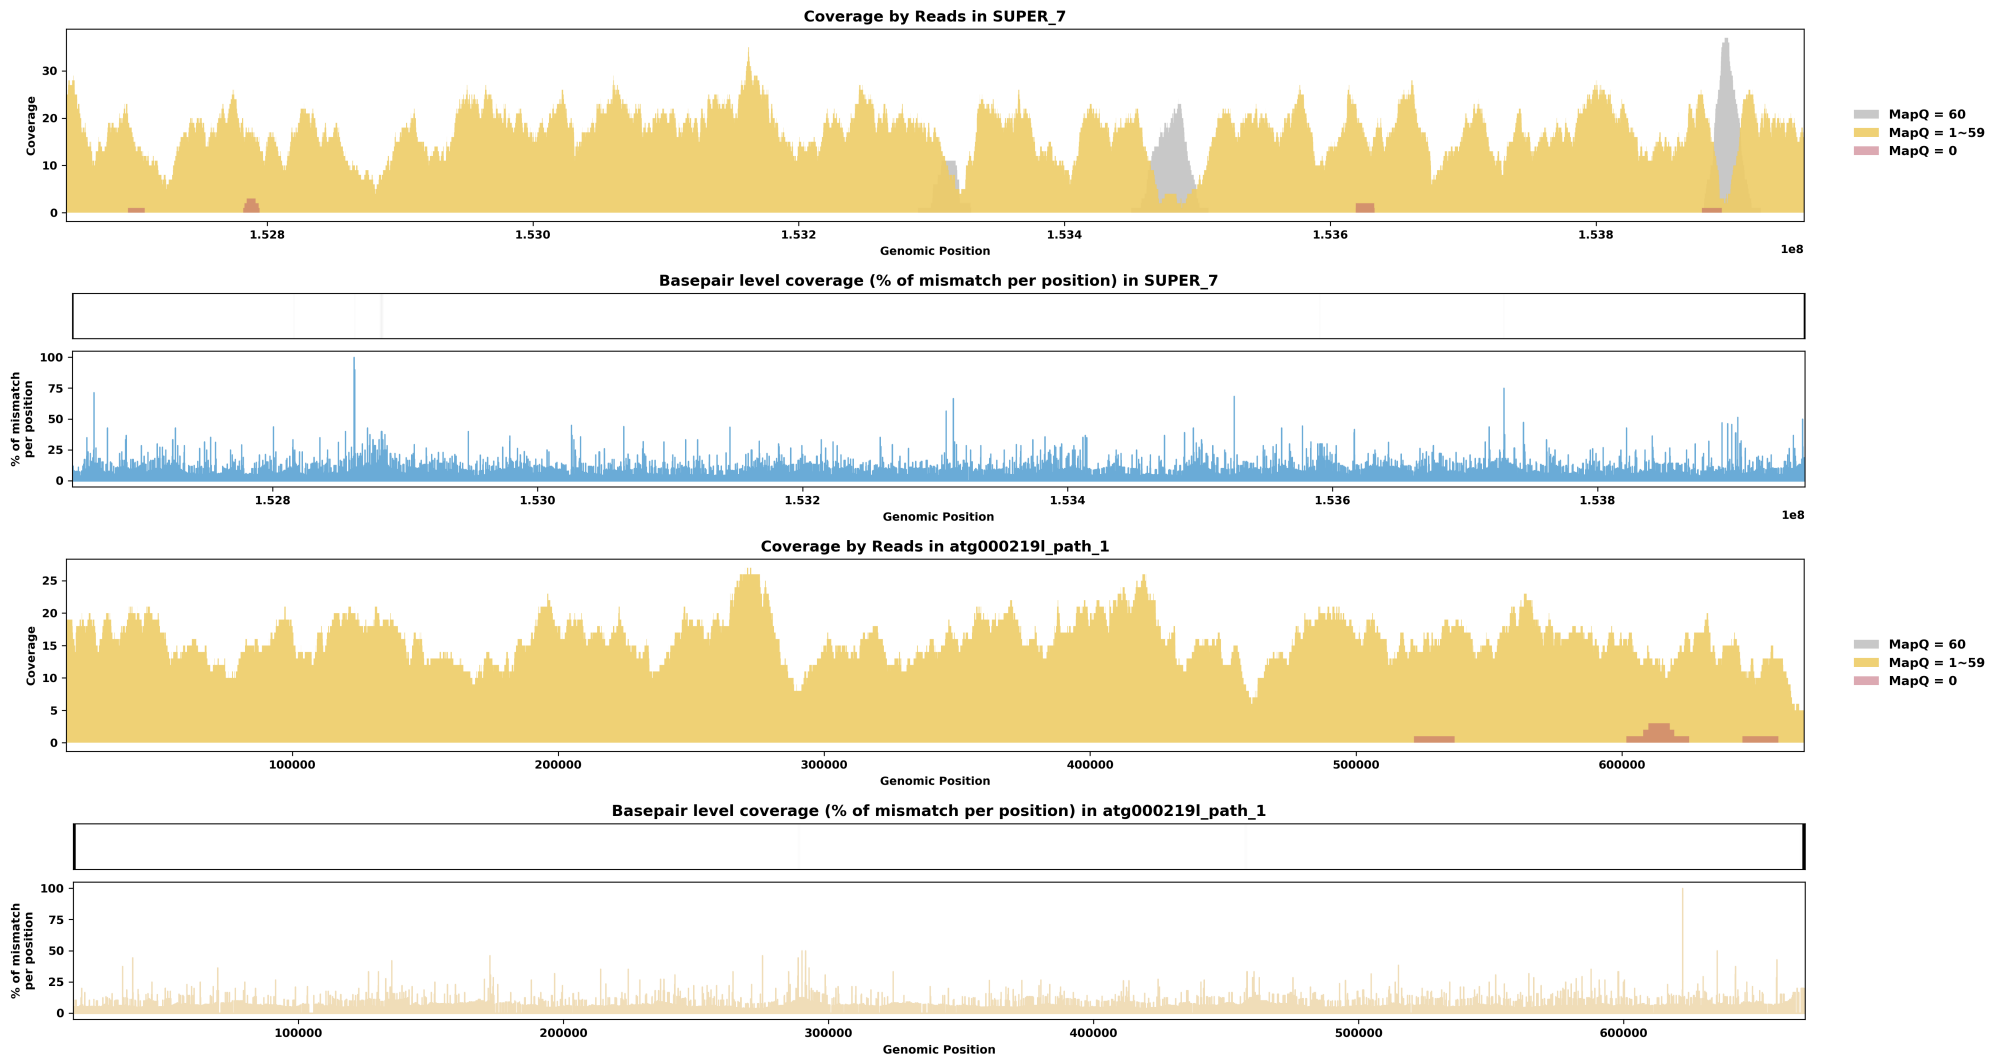

Species ID: mMusNiv1  
 Common Name: Least weasel  
 Scientific Name: *Mustela nivalis*  
 Assembly Type: Haplotype Resolved  
 Data Source: VGP

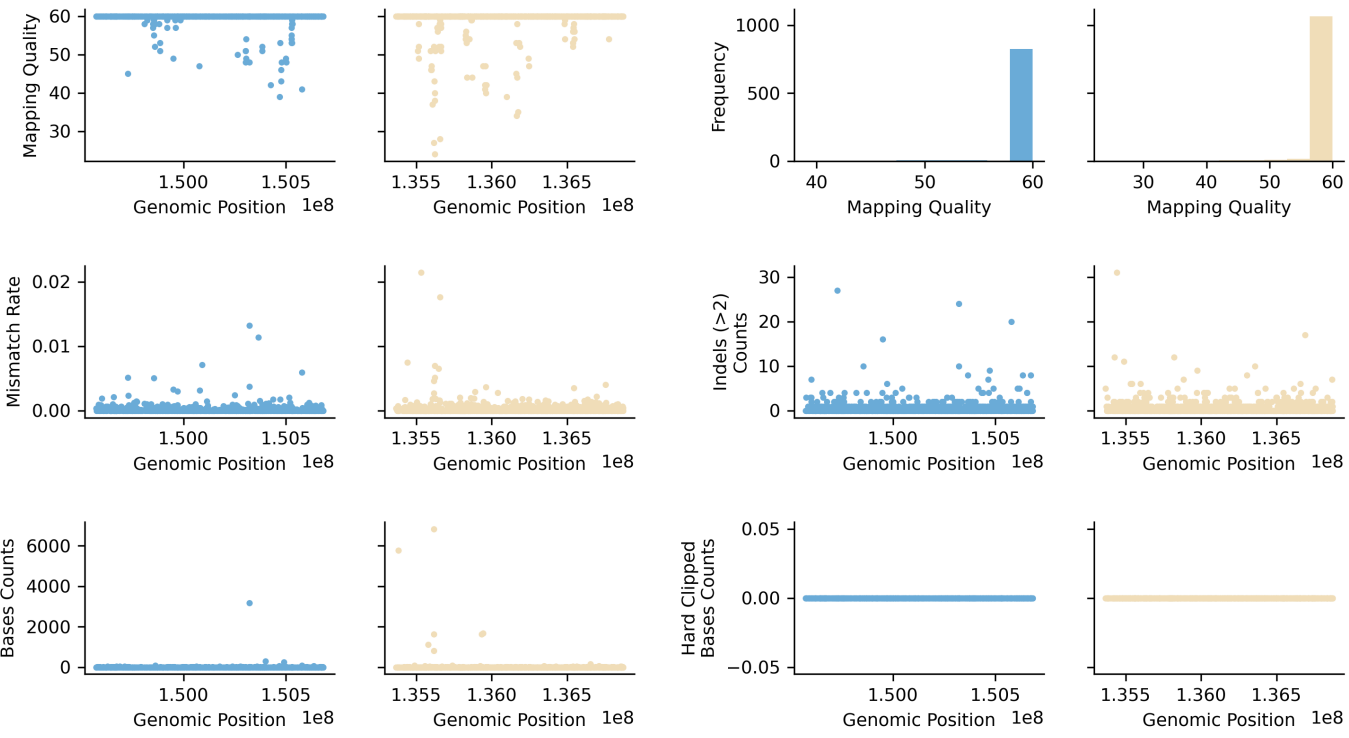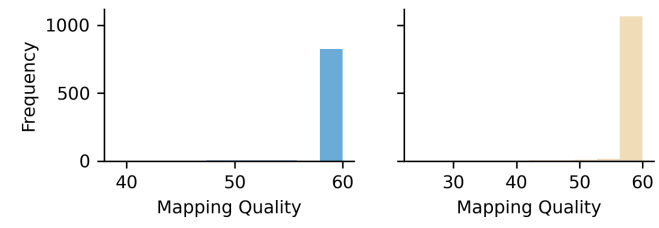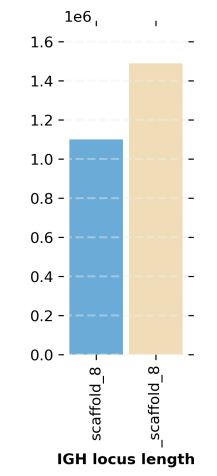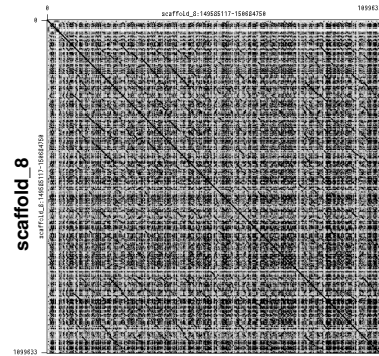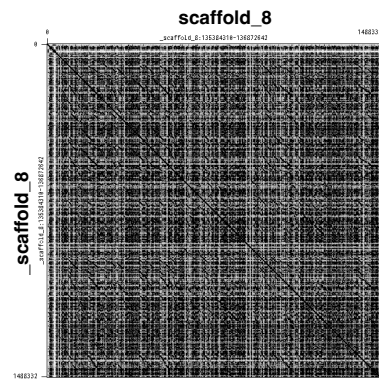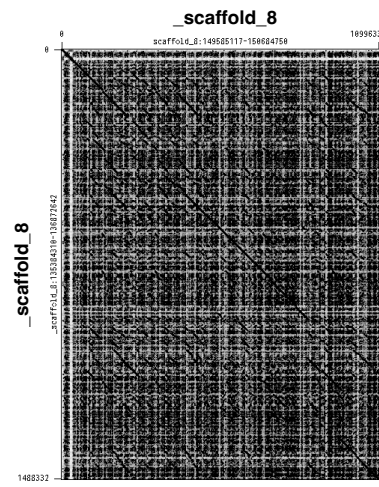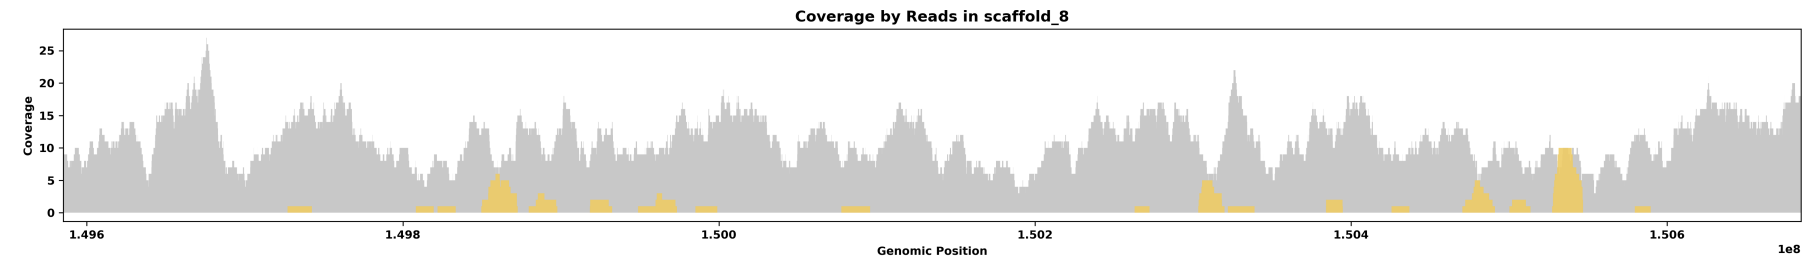

MapQ = 60  
 MapQ = 1-59  
 MapQ = 0

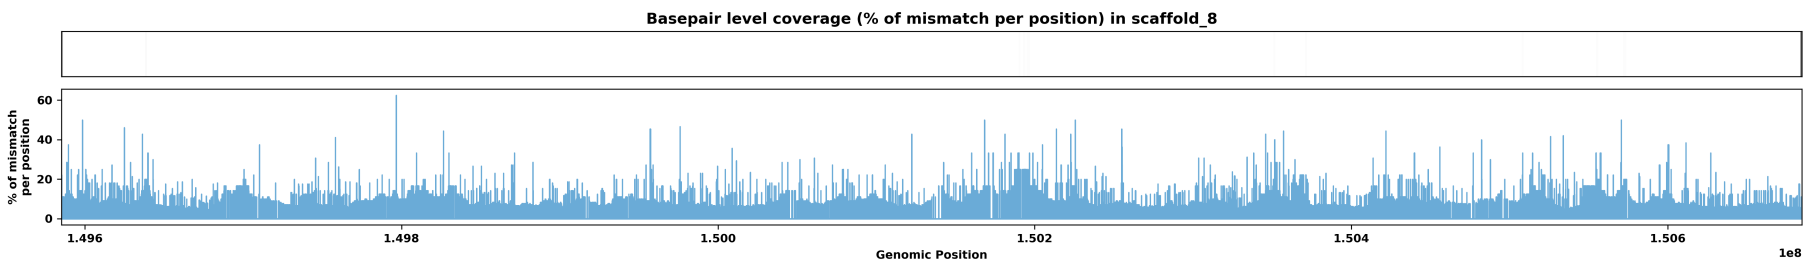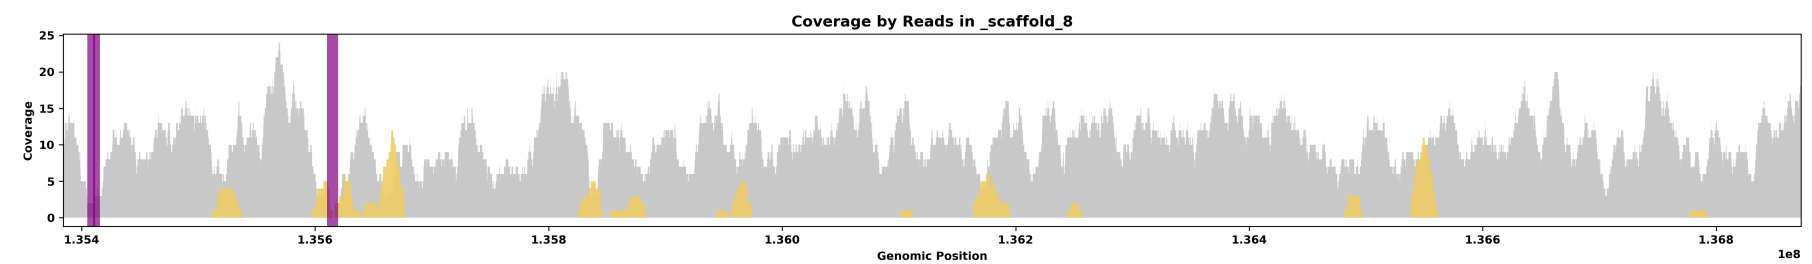

MapQ = 60  
 MapQ = 1-59  
 MapQ = 0

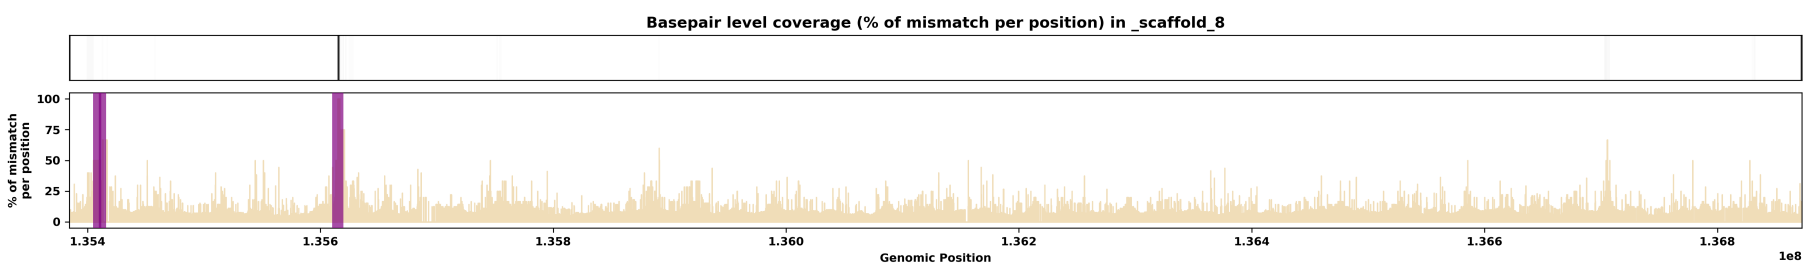

Species ID: mMyoDau2  
 Common Name: Daubenton's bat  
 Scientific Name: *Myotis daubentonii*  
 Assembly Type: Not Haplotype Resolved  
 Data Source: VGP

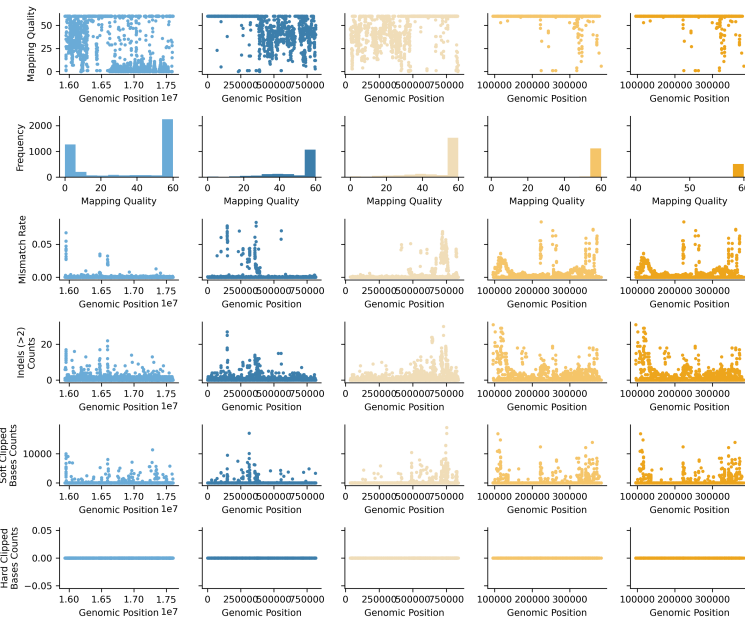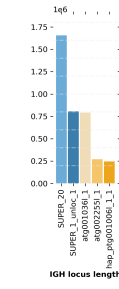

primary SUPER\_20  
 primary SUPER\_1\_unloc\_1  
 alternate atg001036l\_1  
 alternate atg002255l\_1  
 alternate hap\_ptg001006l\_1\_1

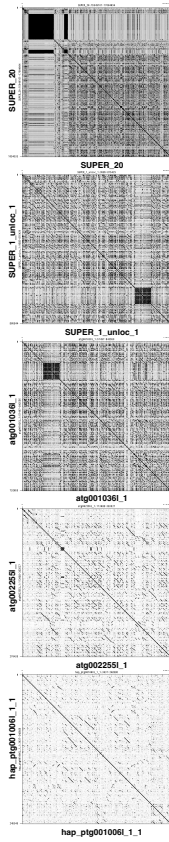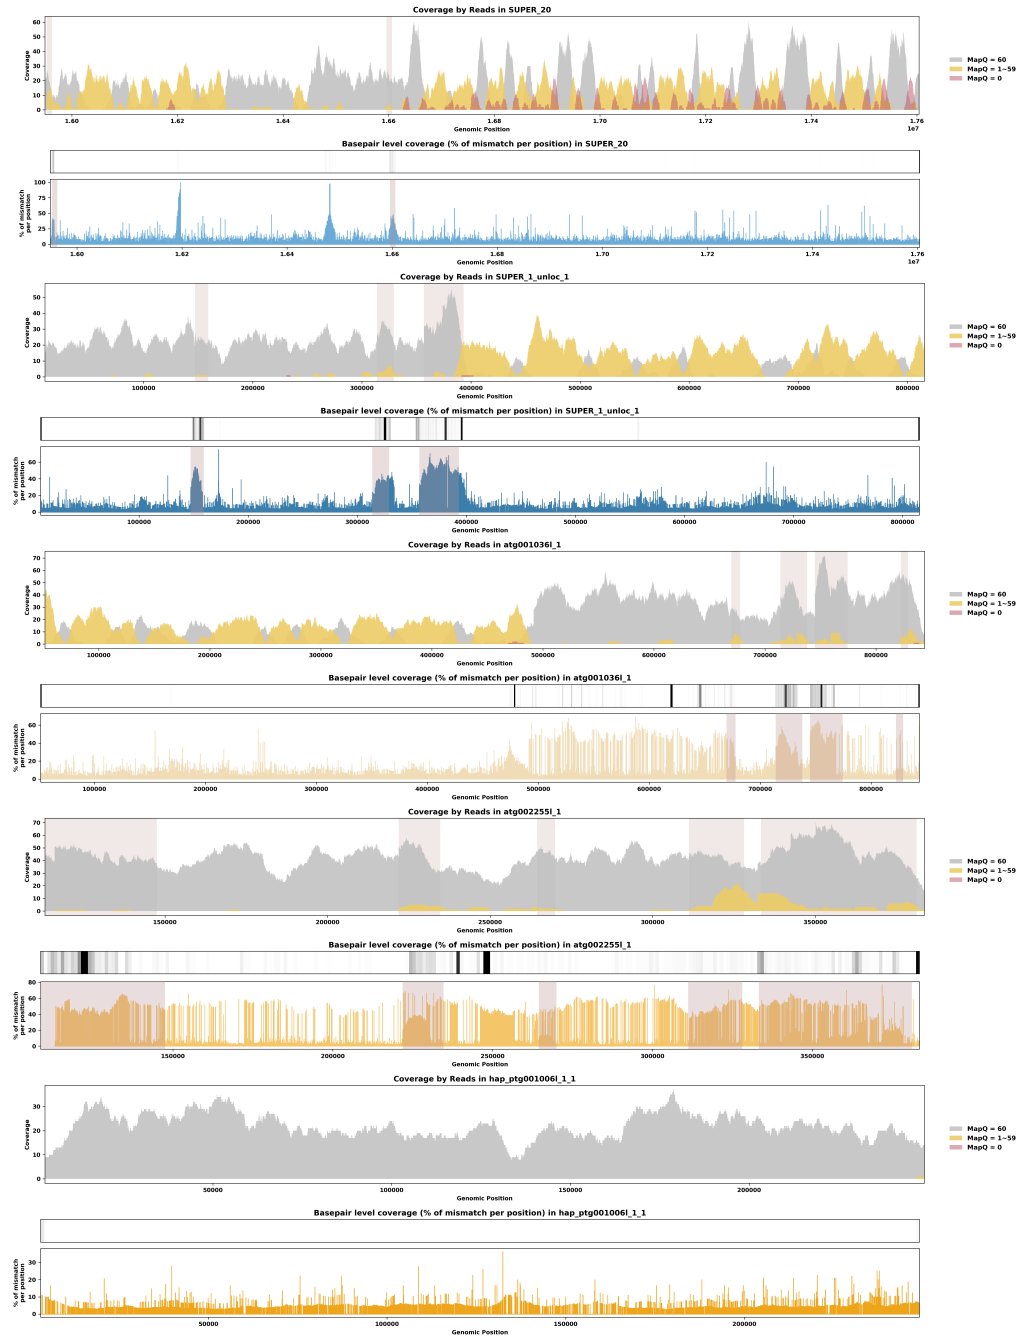

Species ID: mMyoYum1  
 Common Name: Yuma myotis  
 Scientific Name: *Myotis yumanensis*  
 Assembly Type: Haplotype Resolved  
 Data Source: CCGP

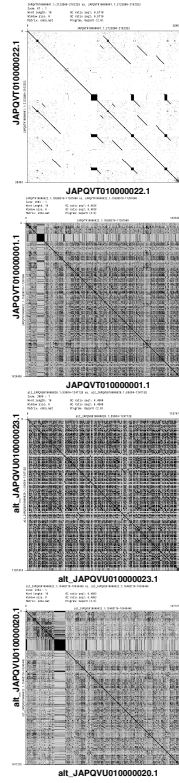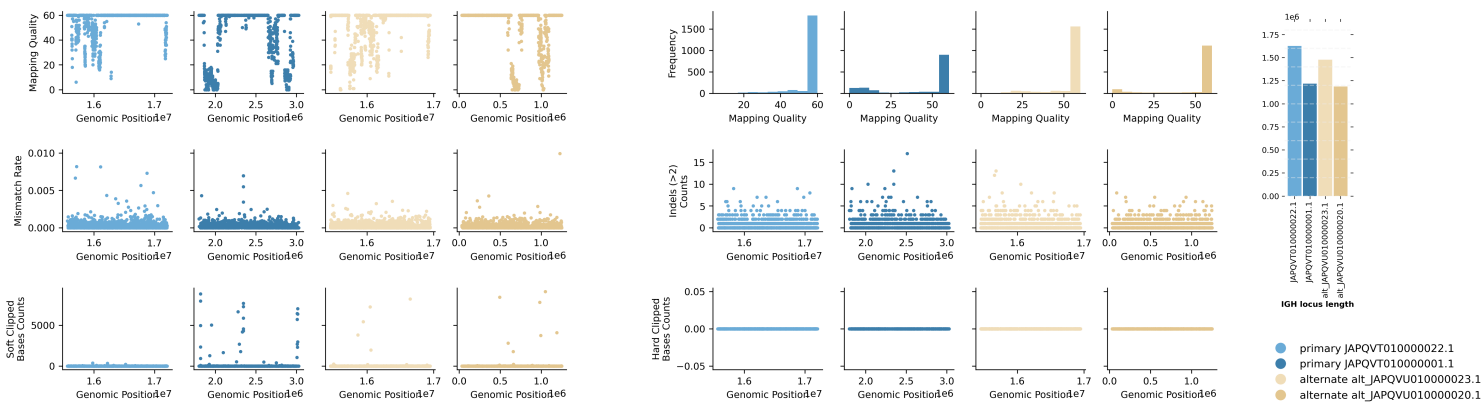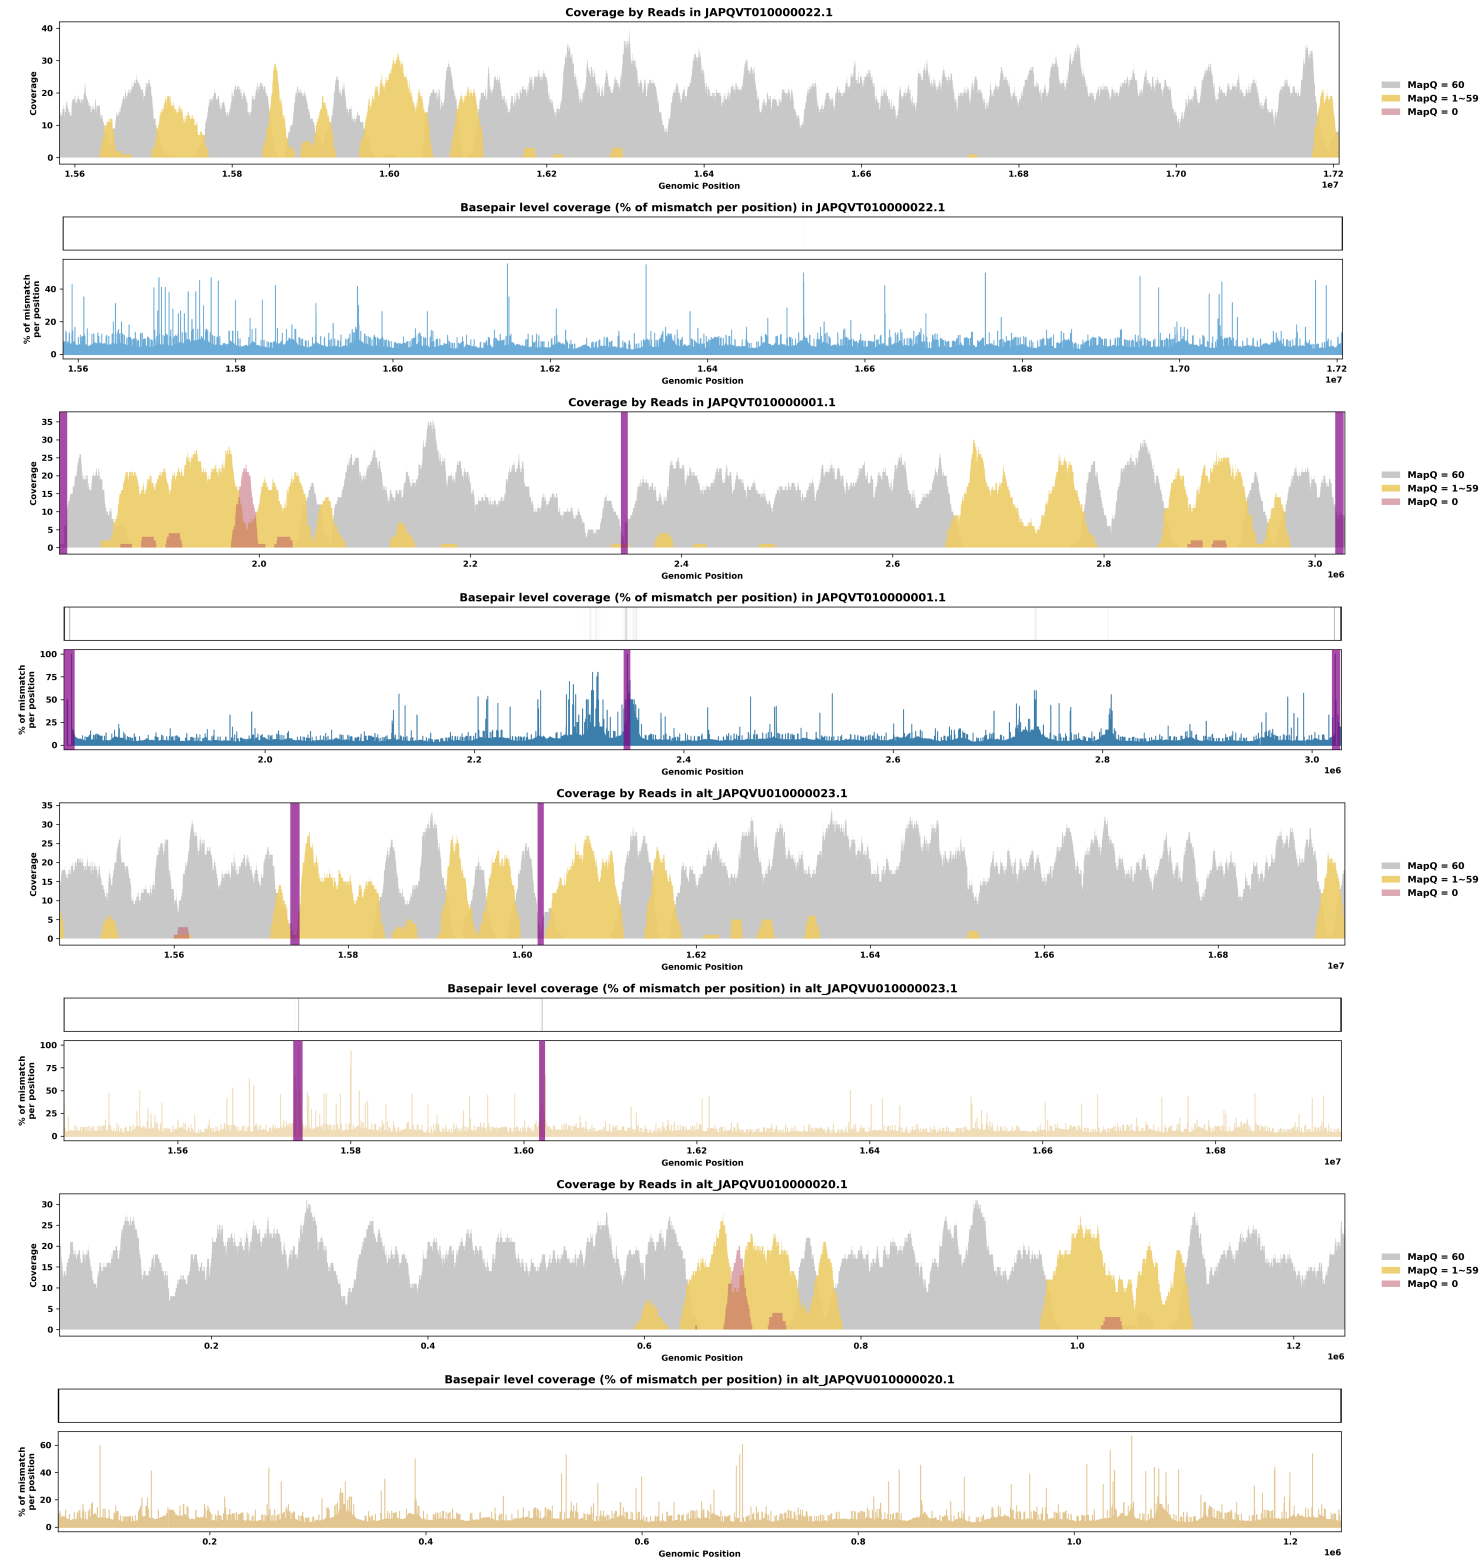

Species ID: mNeoNeb1

Common Name: Clouded Leopard

Scientific Name: Neofelis\_nebulosa

Assembly Type: Not Haplotype Resolved

Data Source: VGP

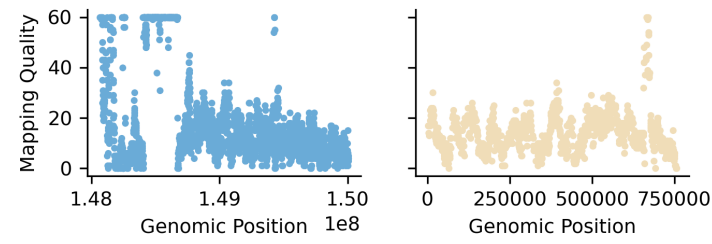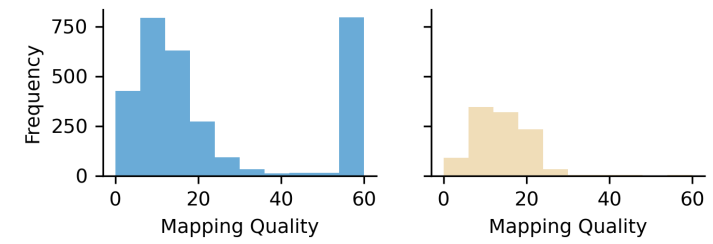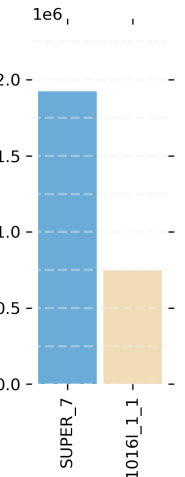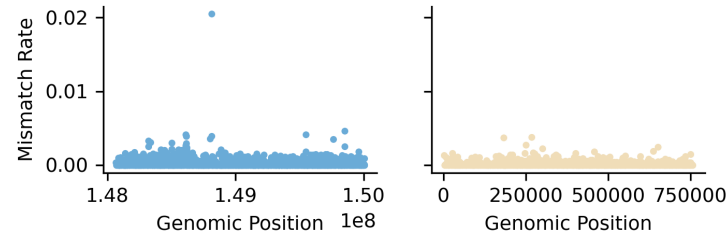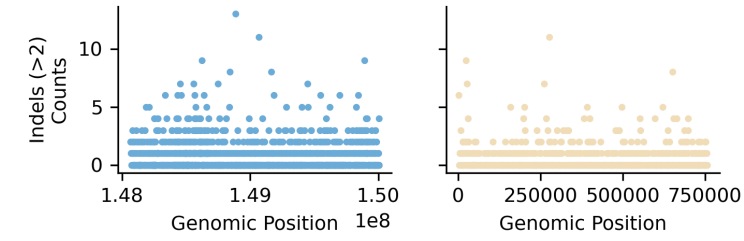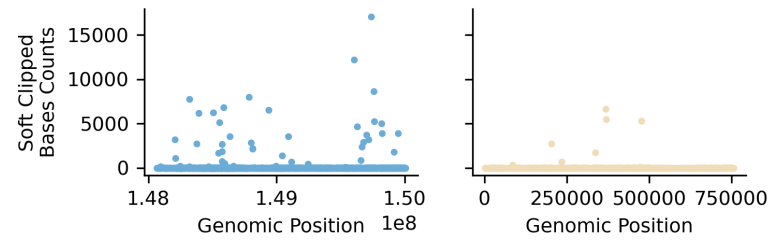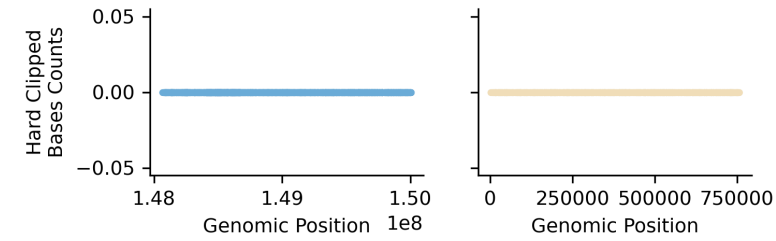

● SUPER\_7  
● hap\_ptg001016l\_1\_1

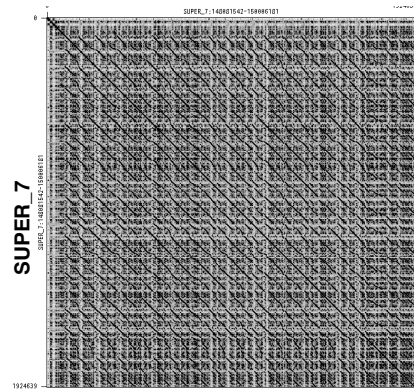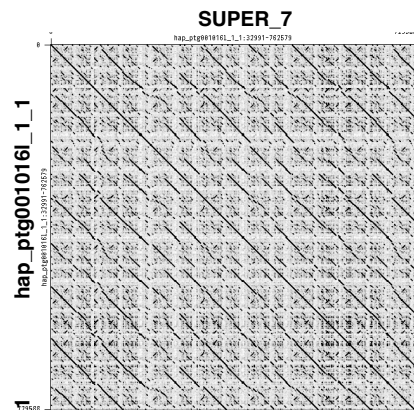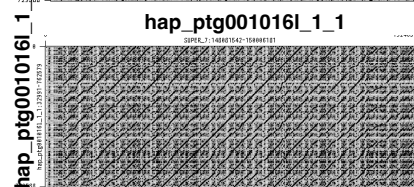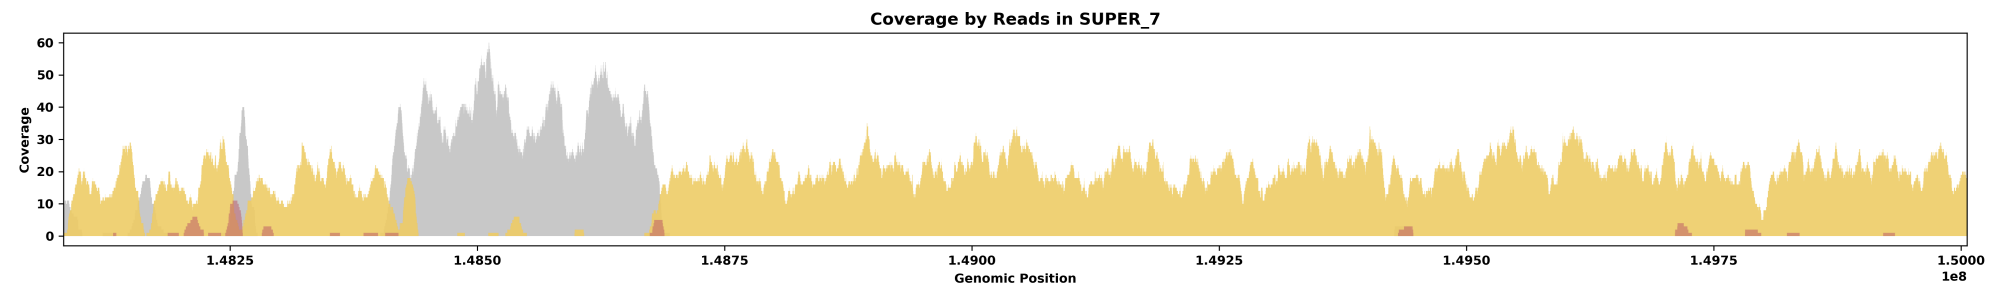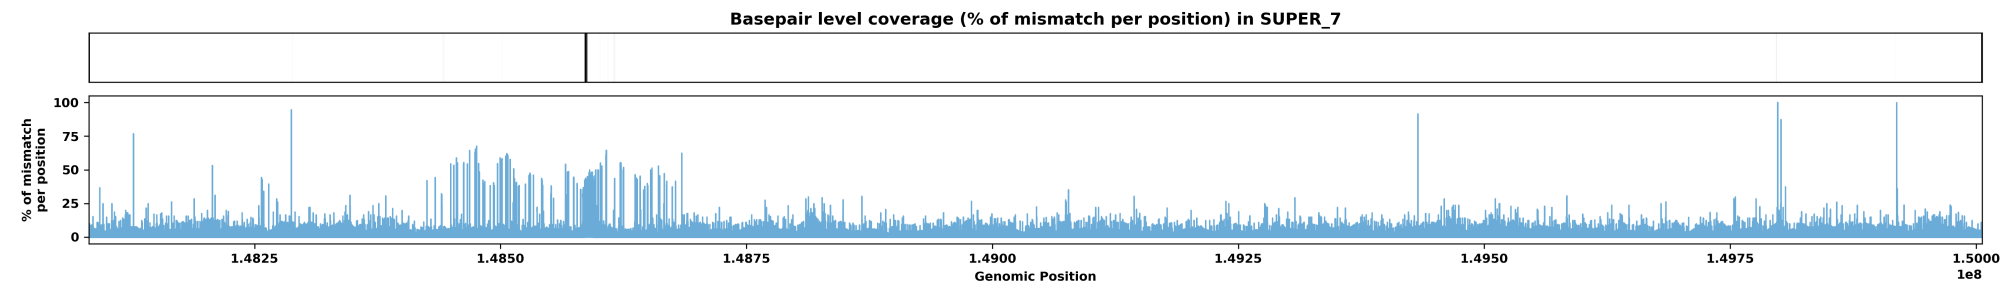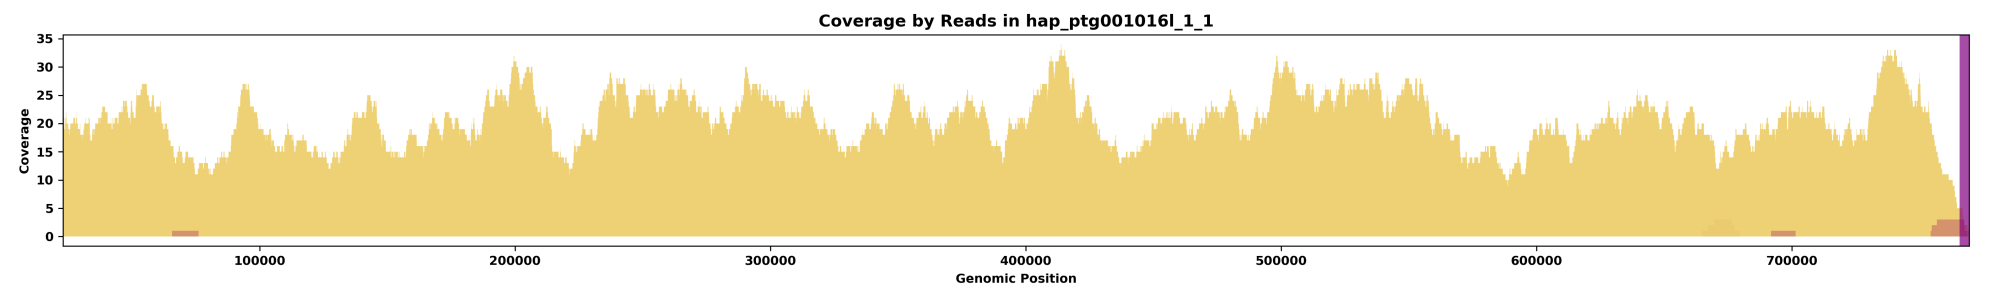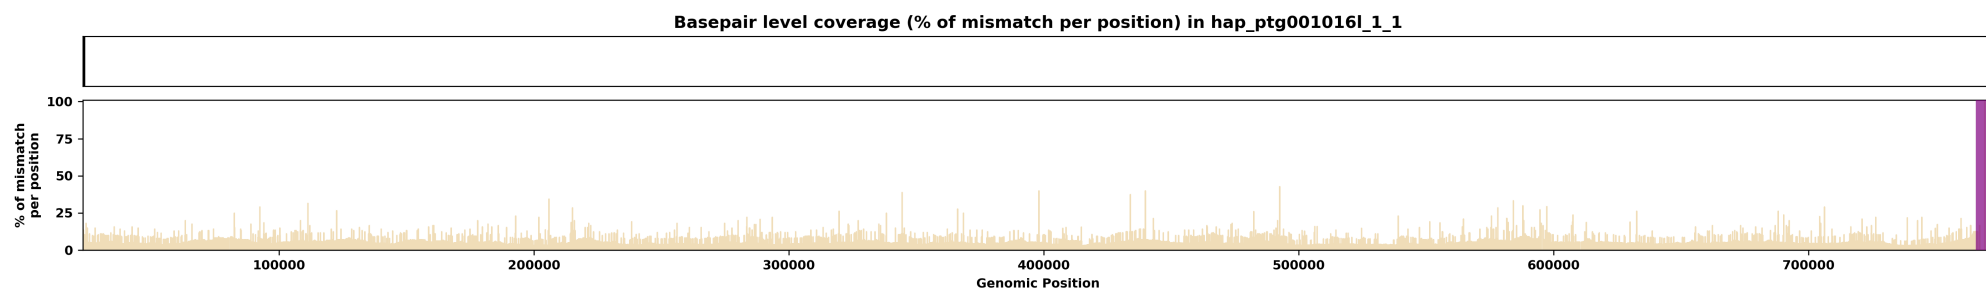



Species ID: mNycCou1  
 Common Name: slow loris  
 Scientific Name: Nycticebus coucang  
 Assembly Type: Not Haplotype Resolved  
 Data Source: VGP

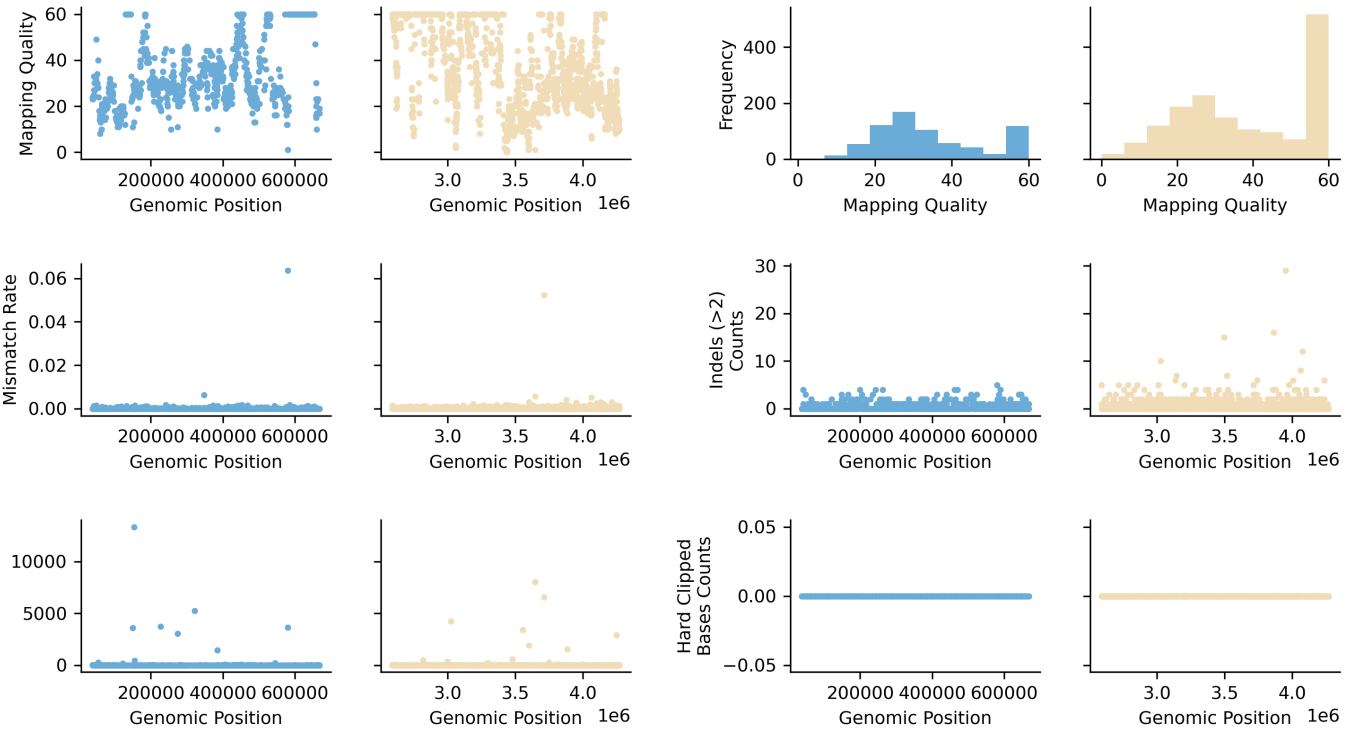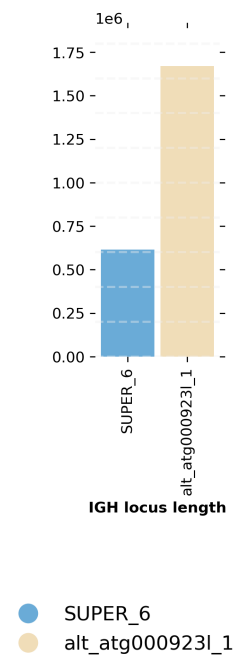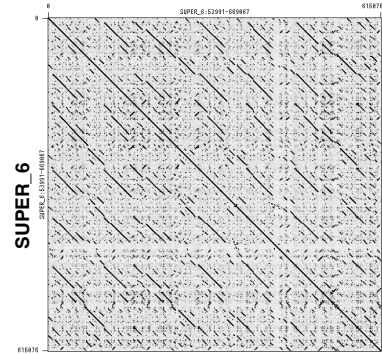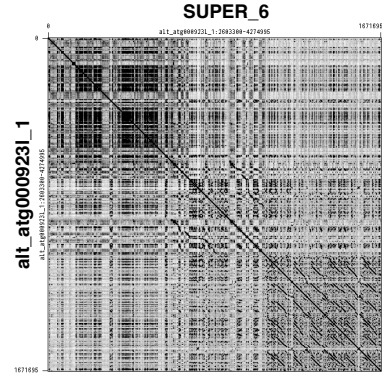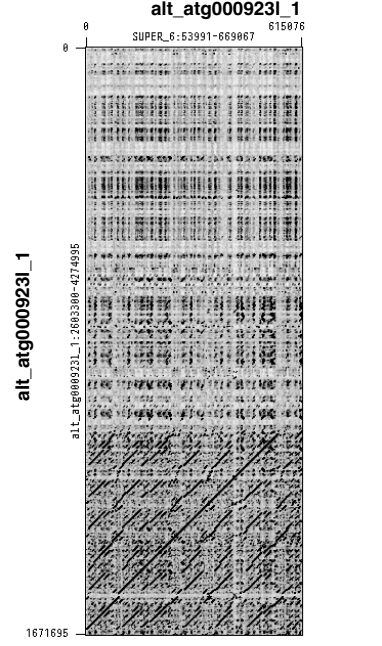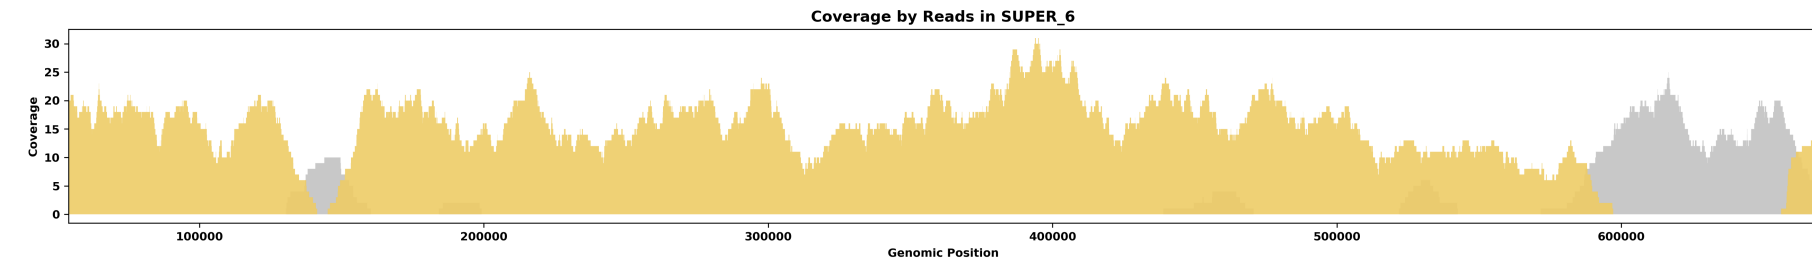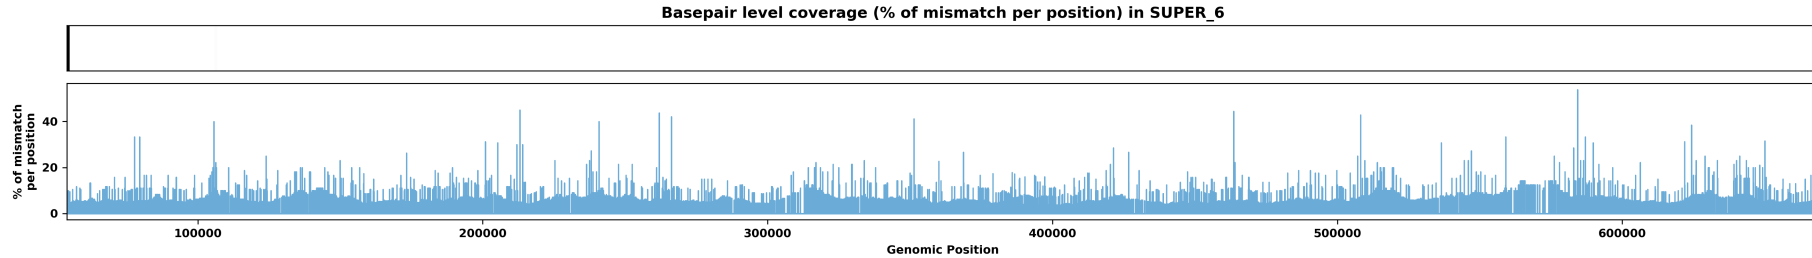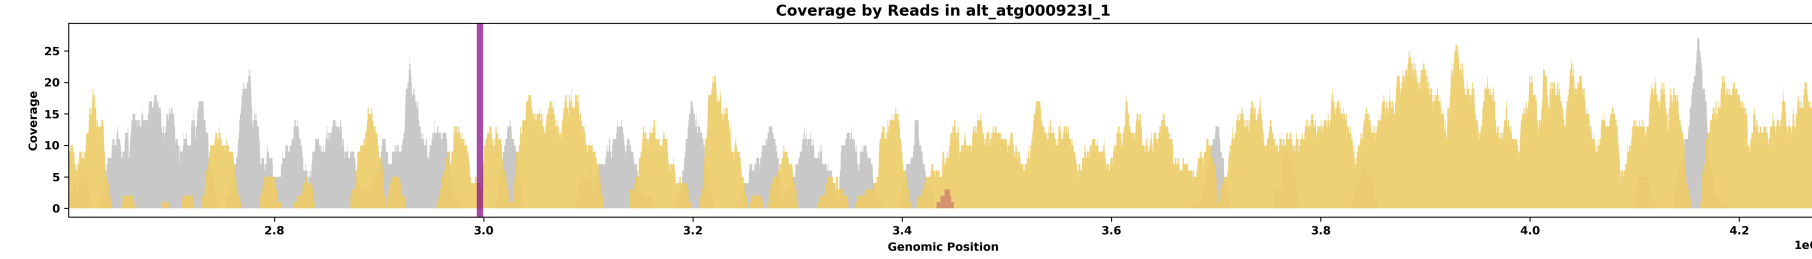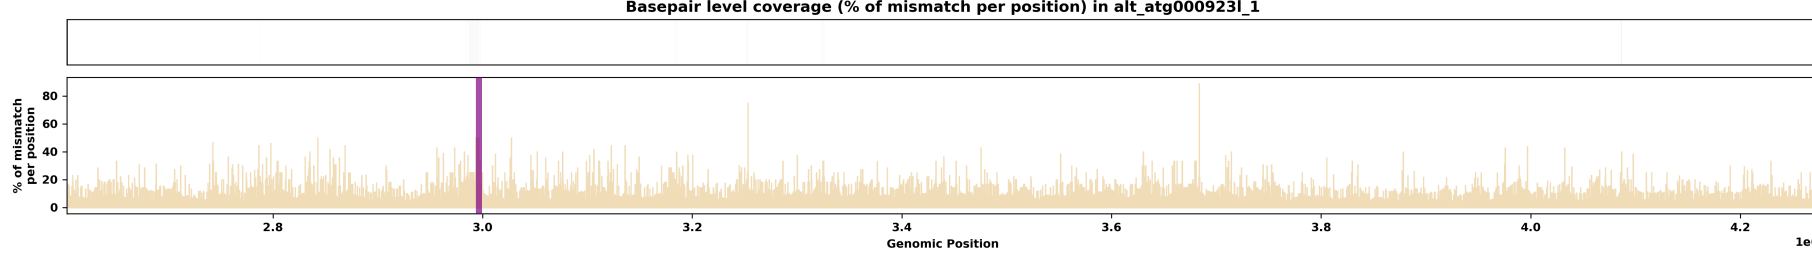

Species ID: mOrcOrc1  
 Common Name: killer whale  
 Scientific Name: Orcinus orca  
 Assembly Type: Not Haplotype Resolved  
 Data Source: VGP

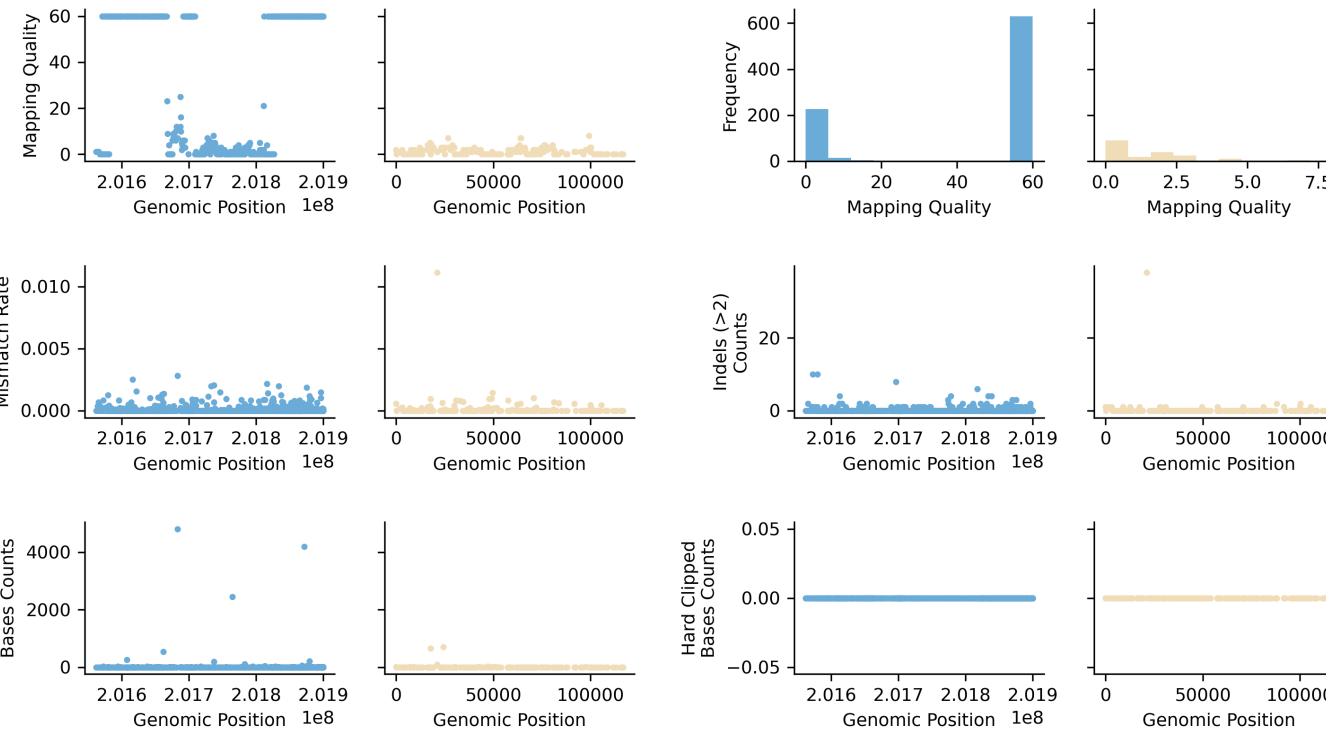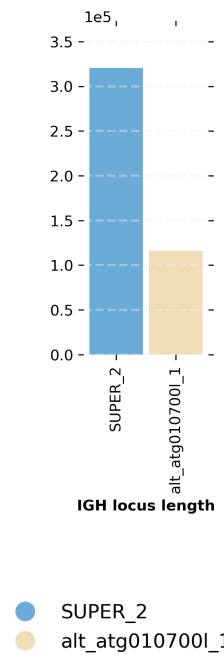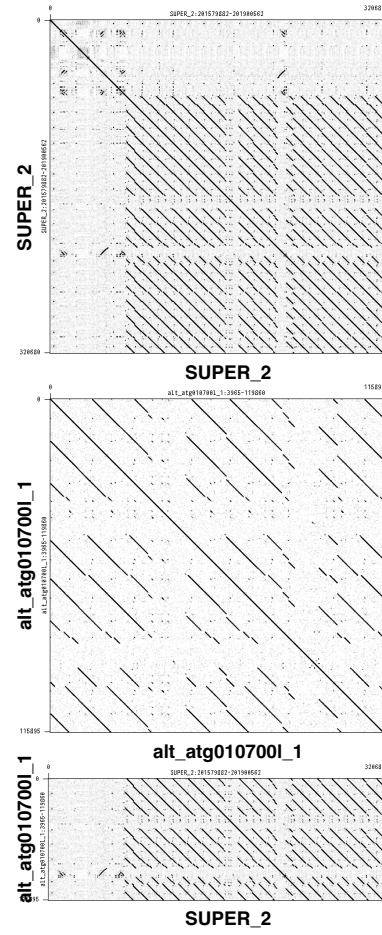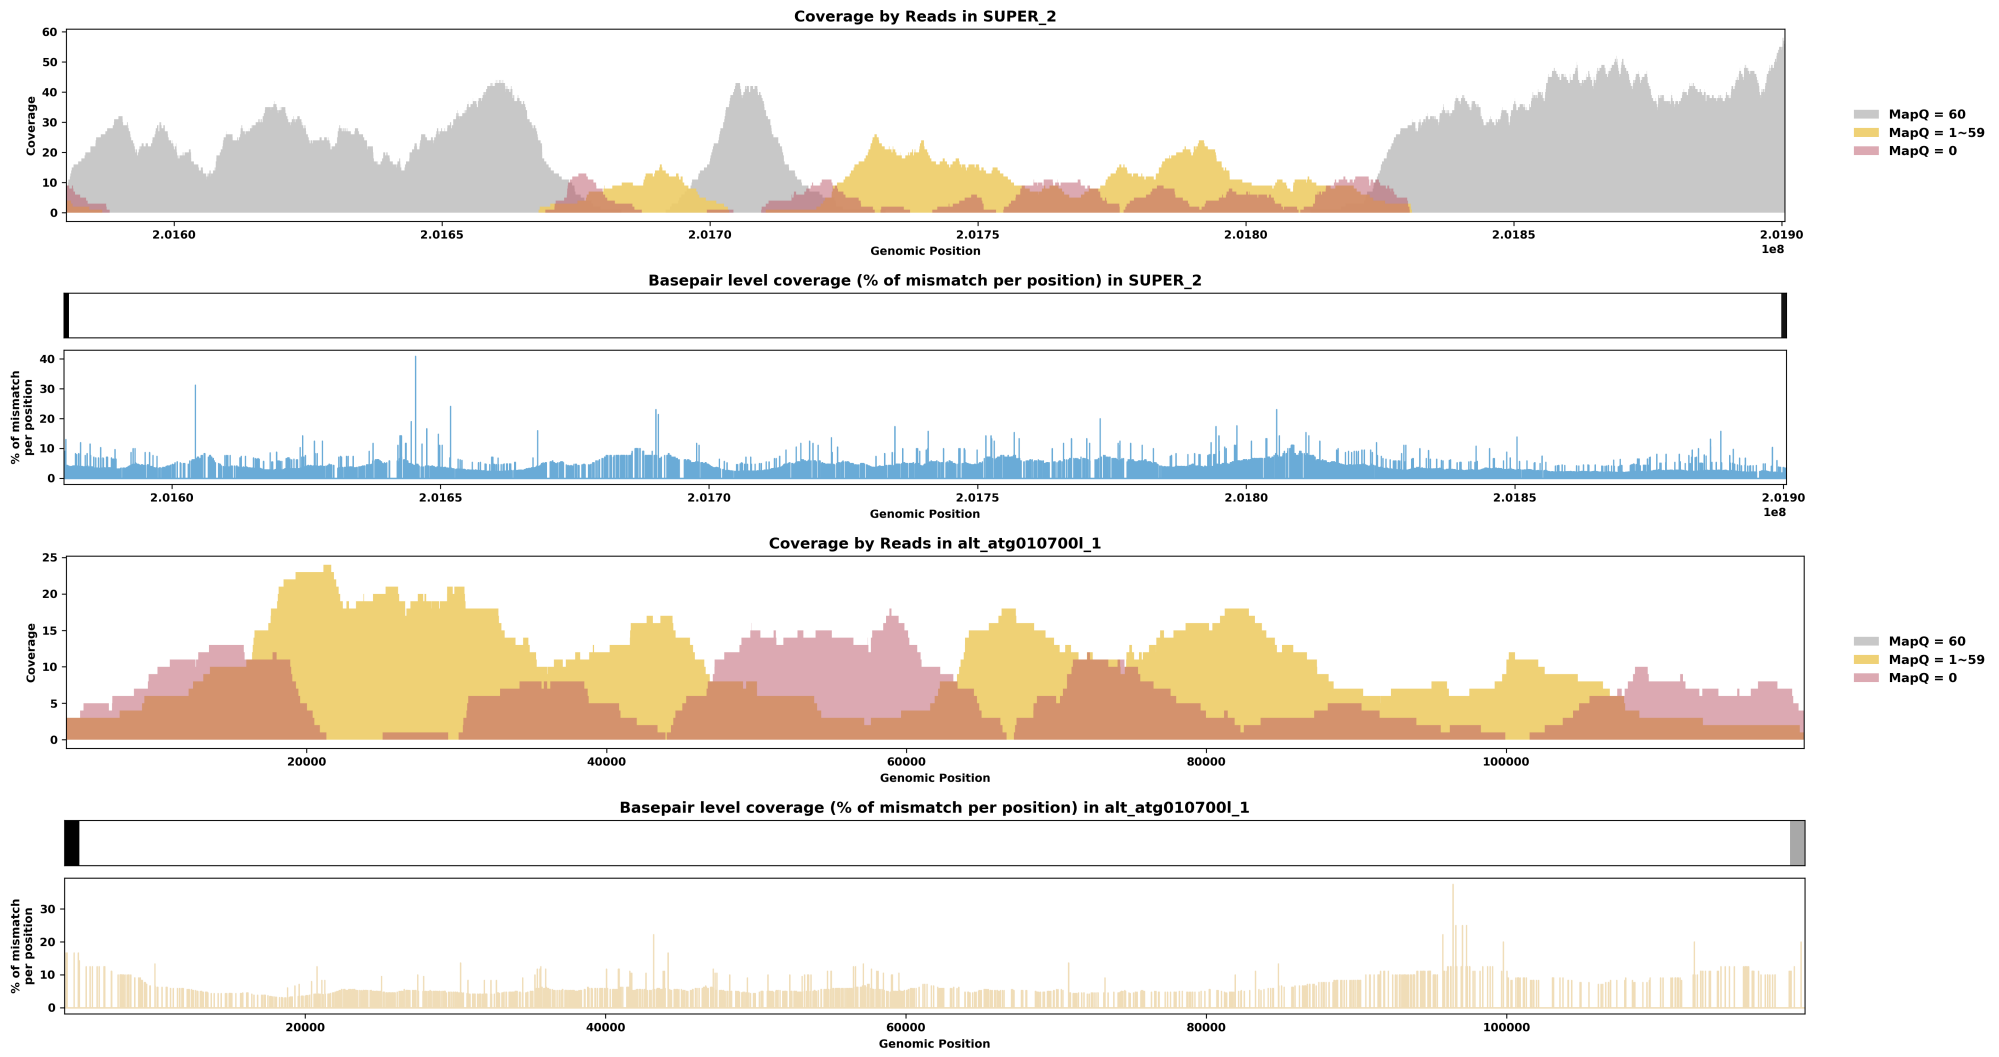

Species ID: mOryCun1  
 Common Name: rabbit  
 Scientific Name: *Oryctolagus cuniculus*  
 Assembly Type: Not Haplotype Resolved  
 Data Source: VGP

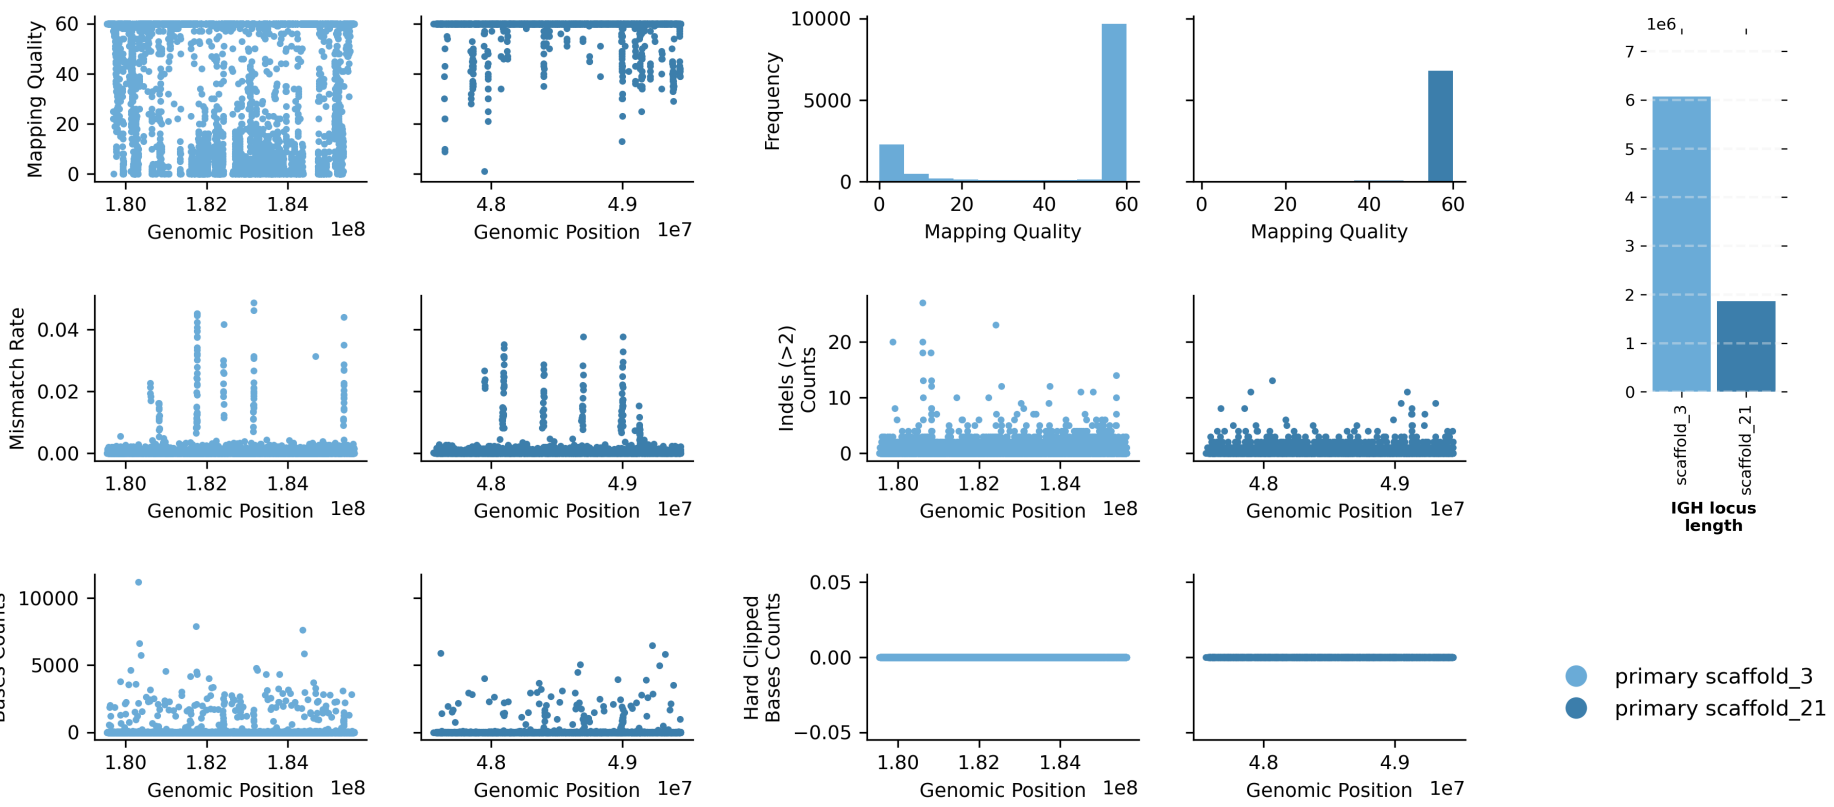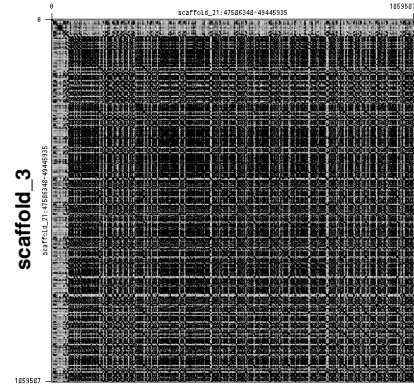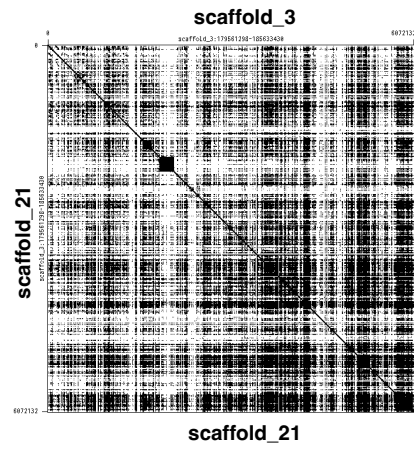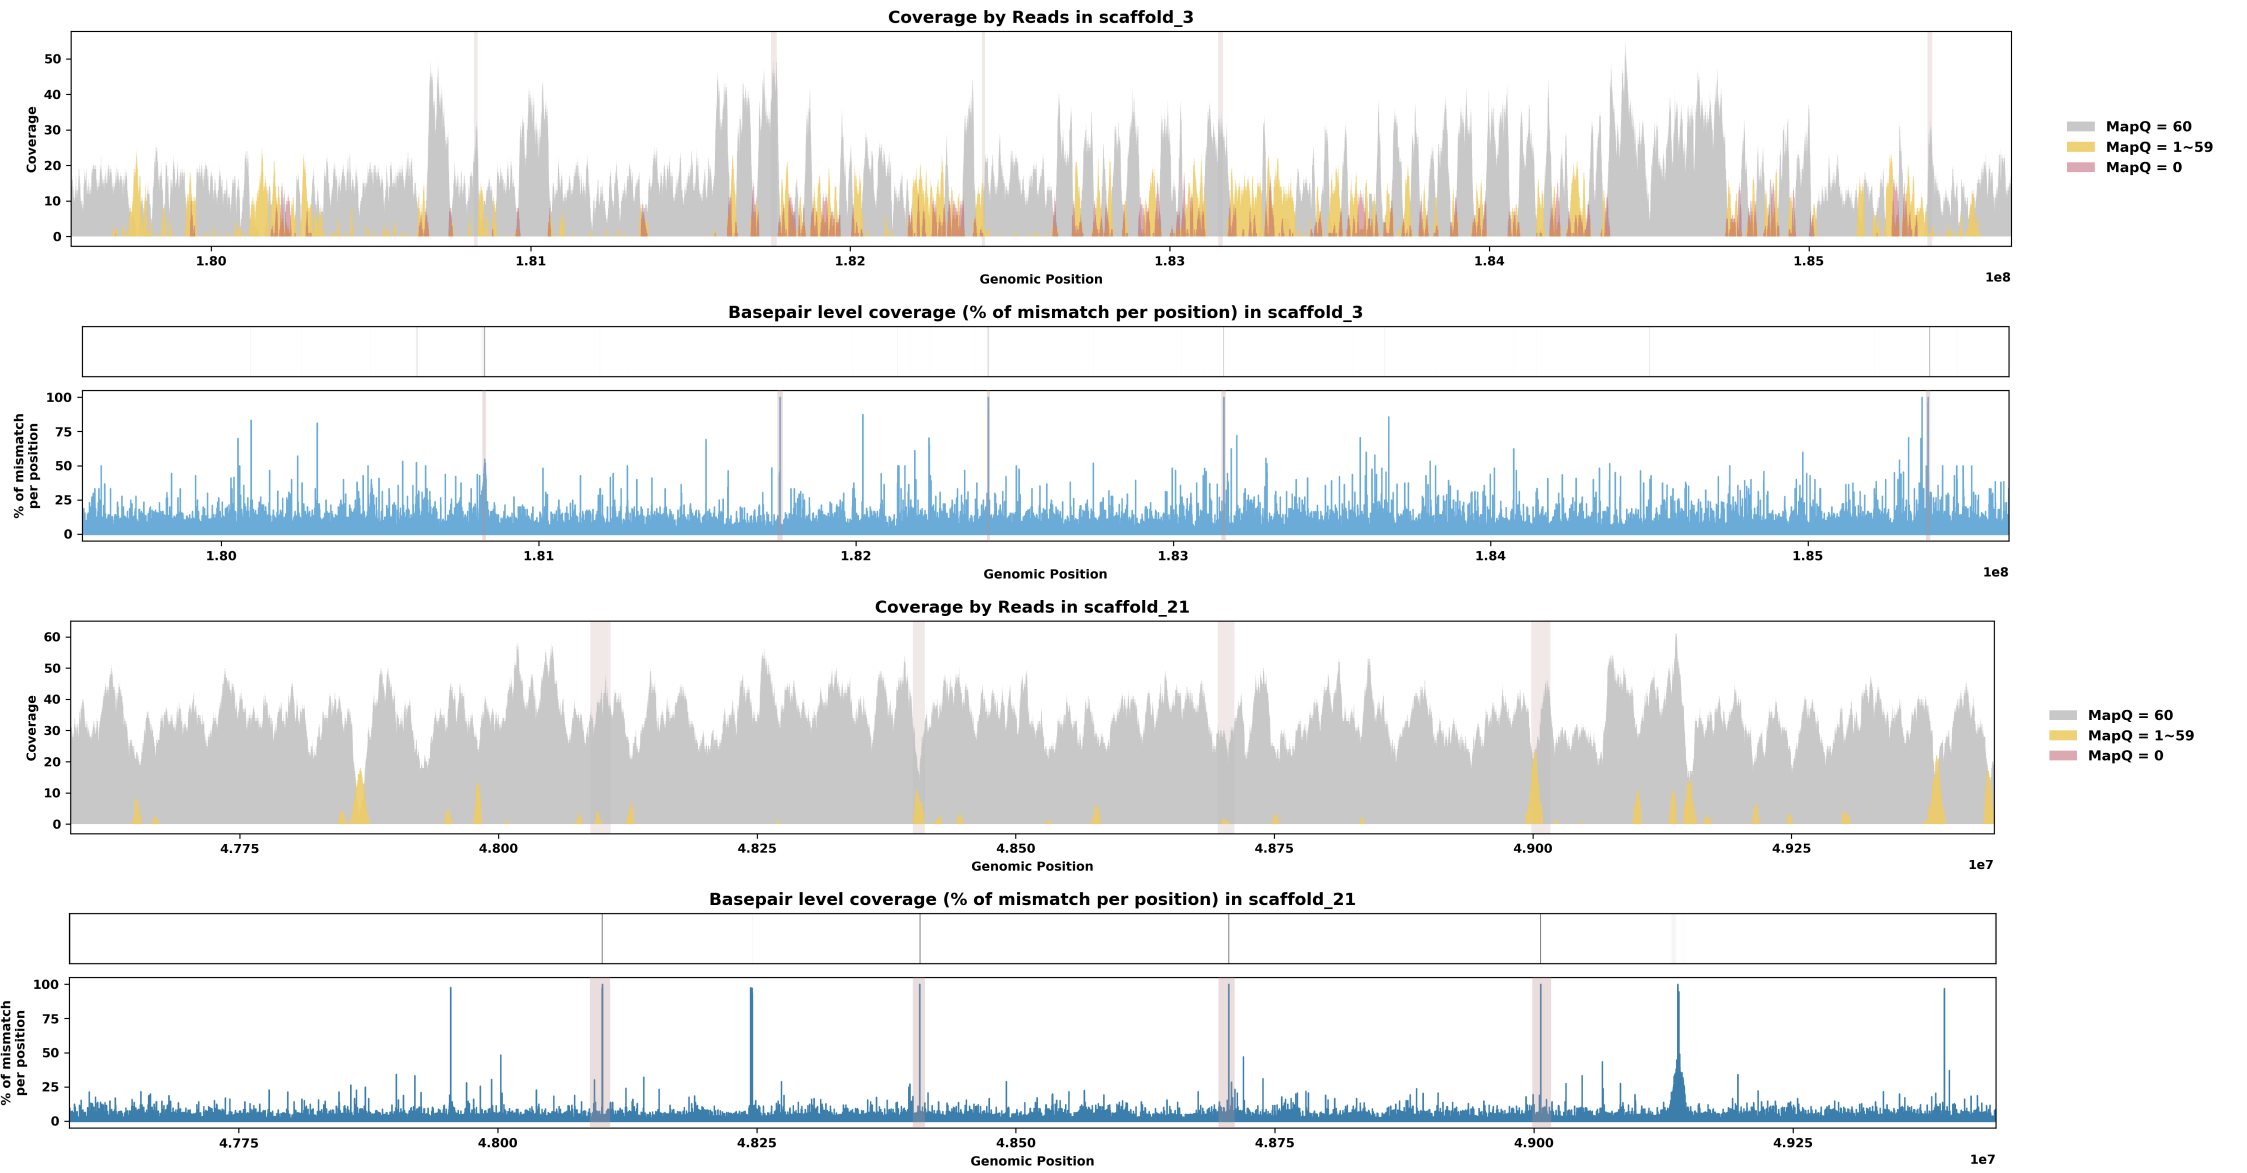

Species ID: mPanPan1  
 Common Name: Bonobo  
 Scientific Name: Pan paniscus  
 Assembly Type: Haplotype Resolved  
 Data Source: T2T Primate

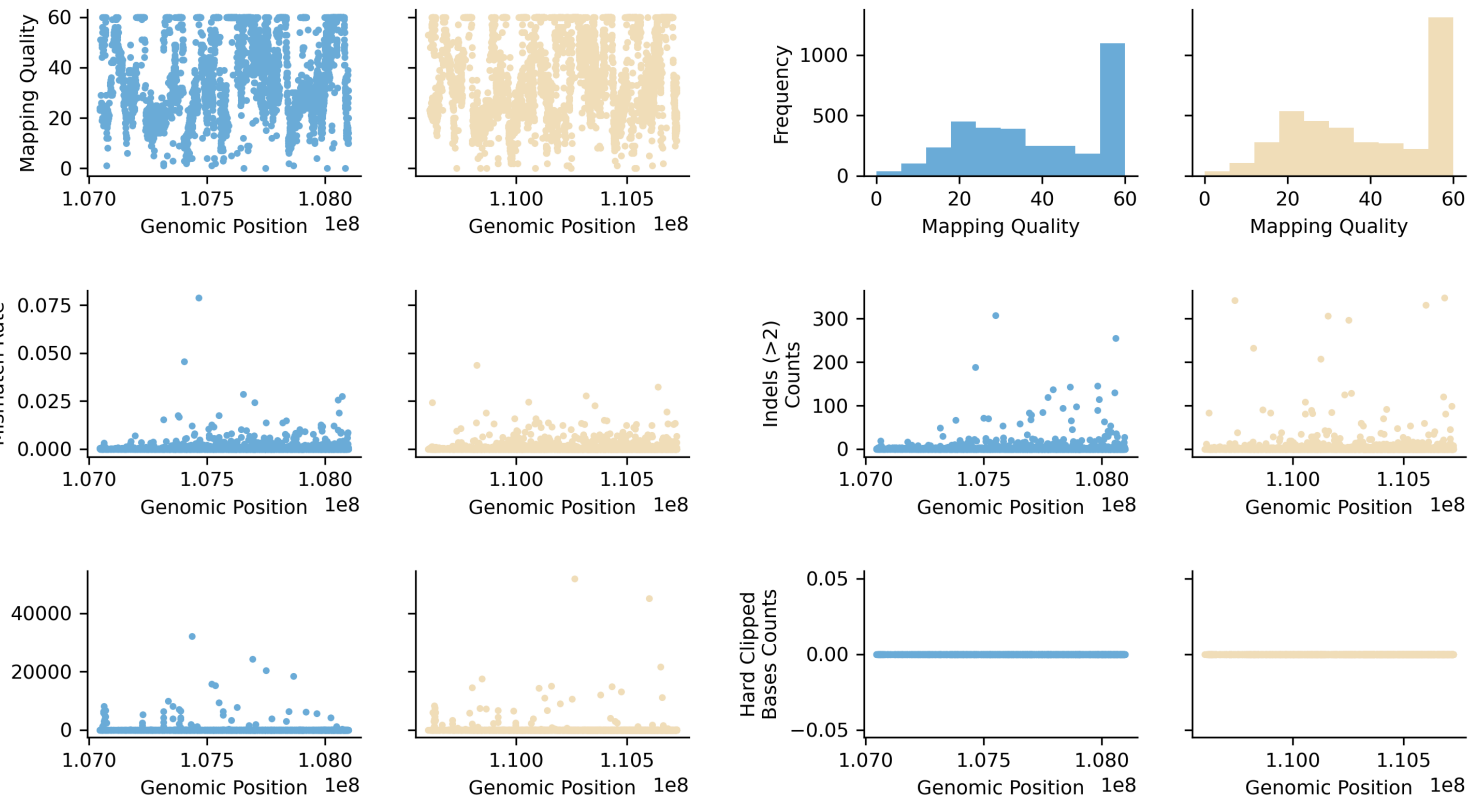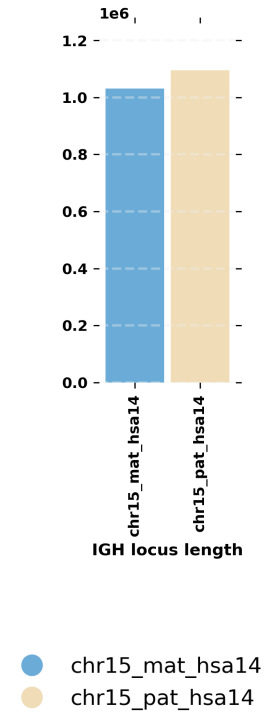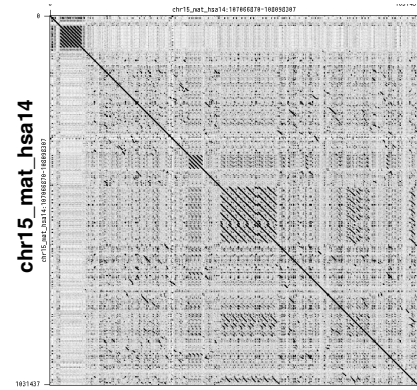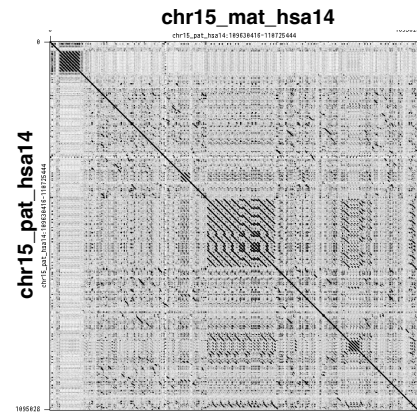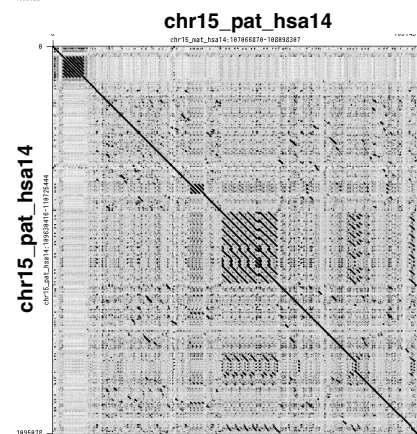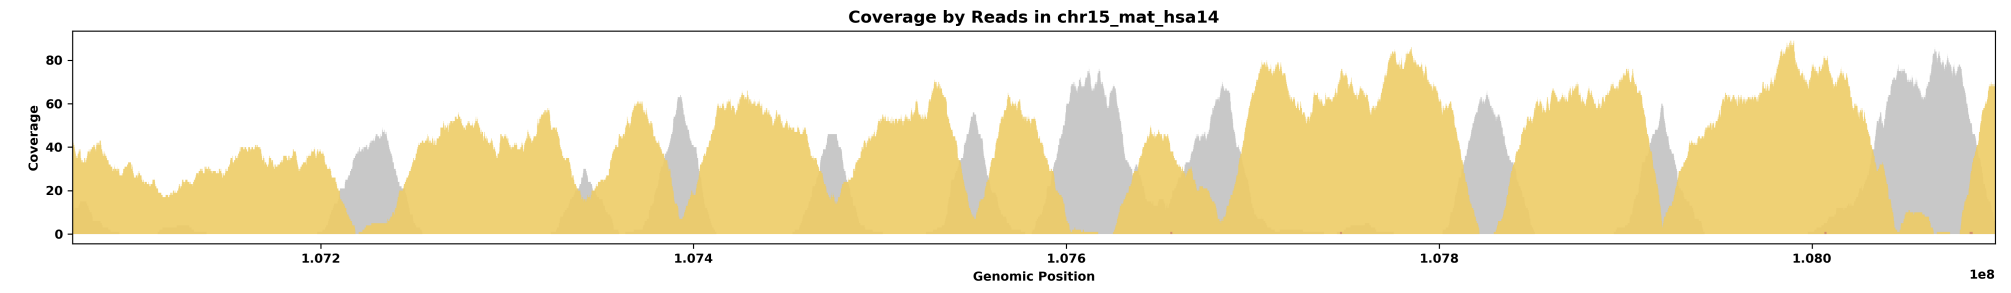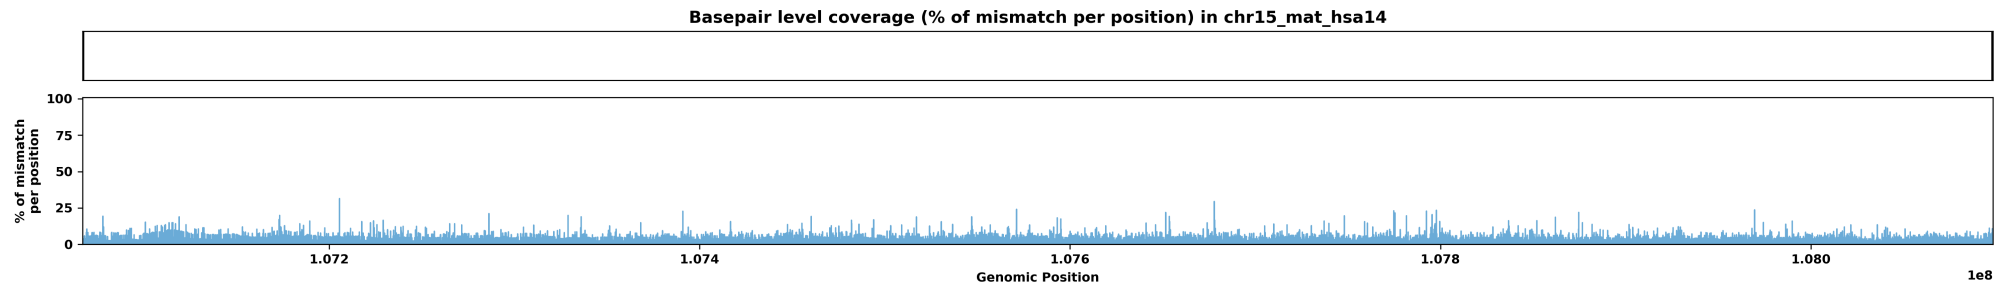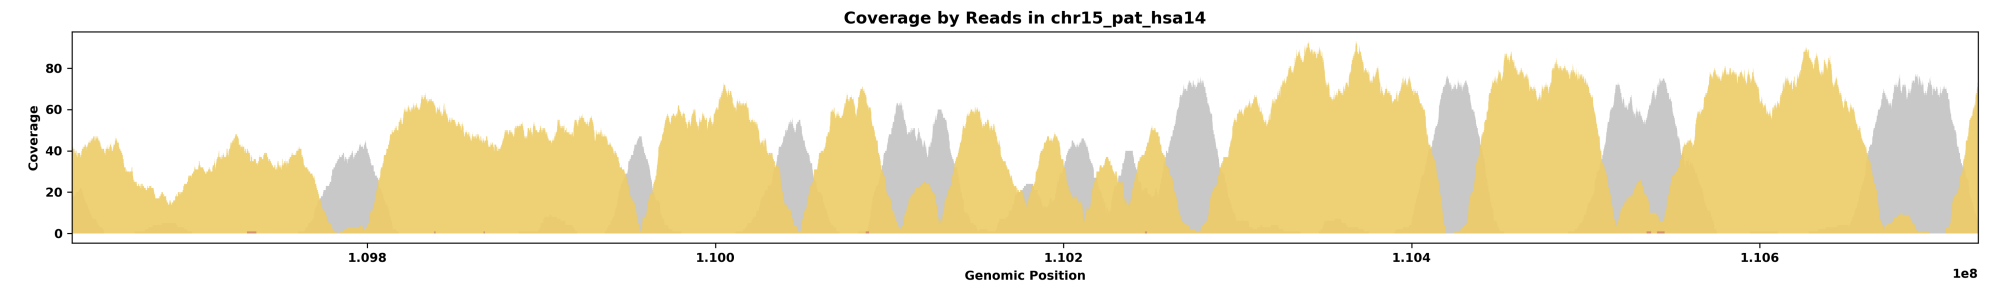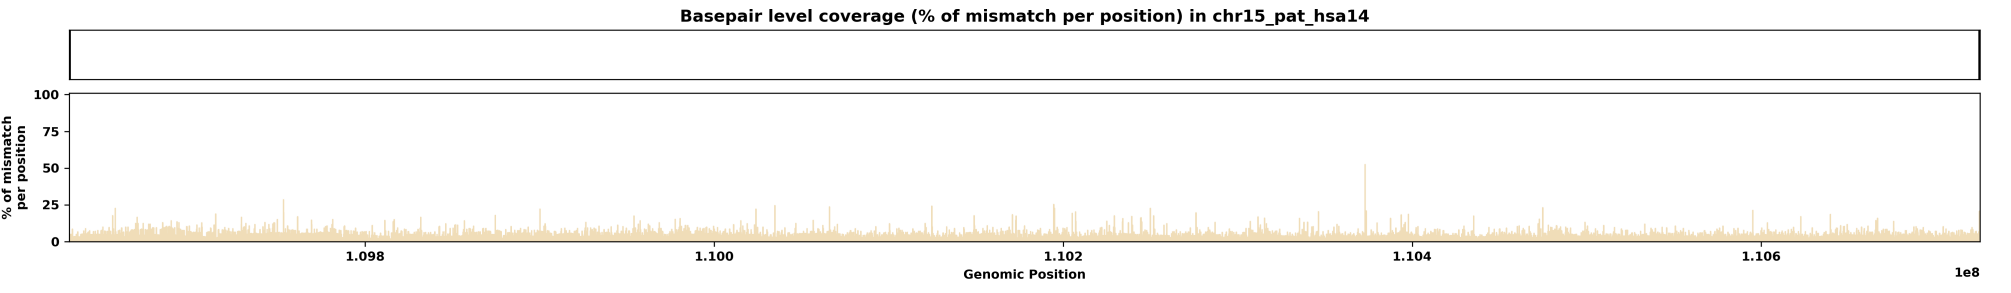

Species ID: mPerMan1  
 Common Name: deer mouse  
 Scientific Name: Peromyscus maniculatus  
 Assembly Type: Not Haplotype Resolved  
 Data Source: CCGP

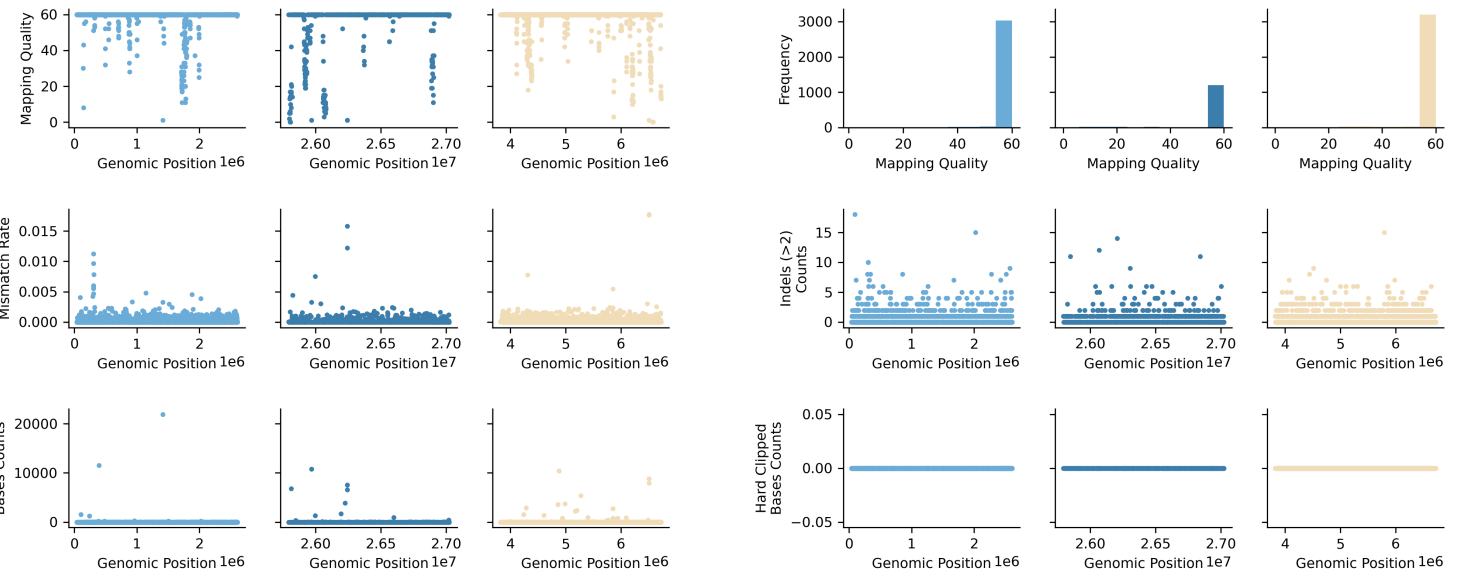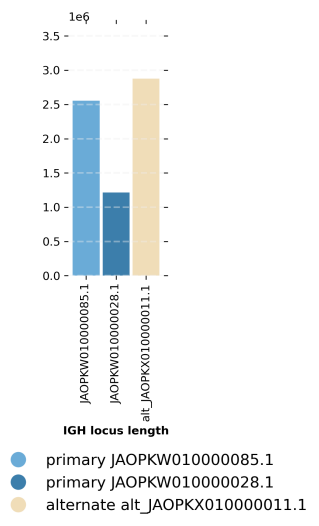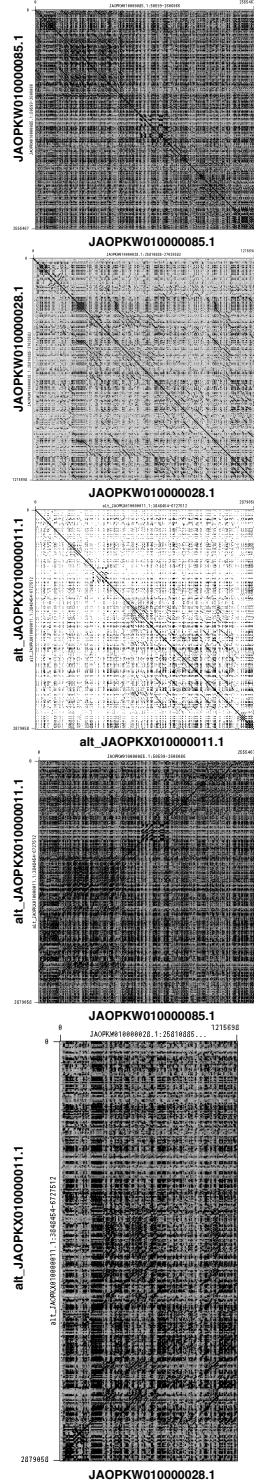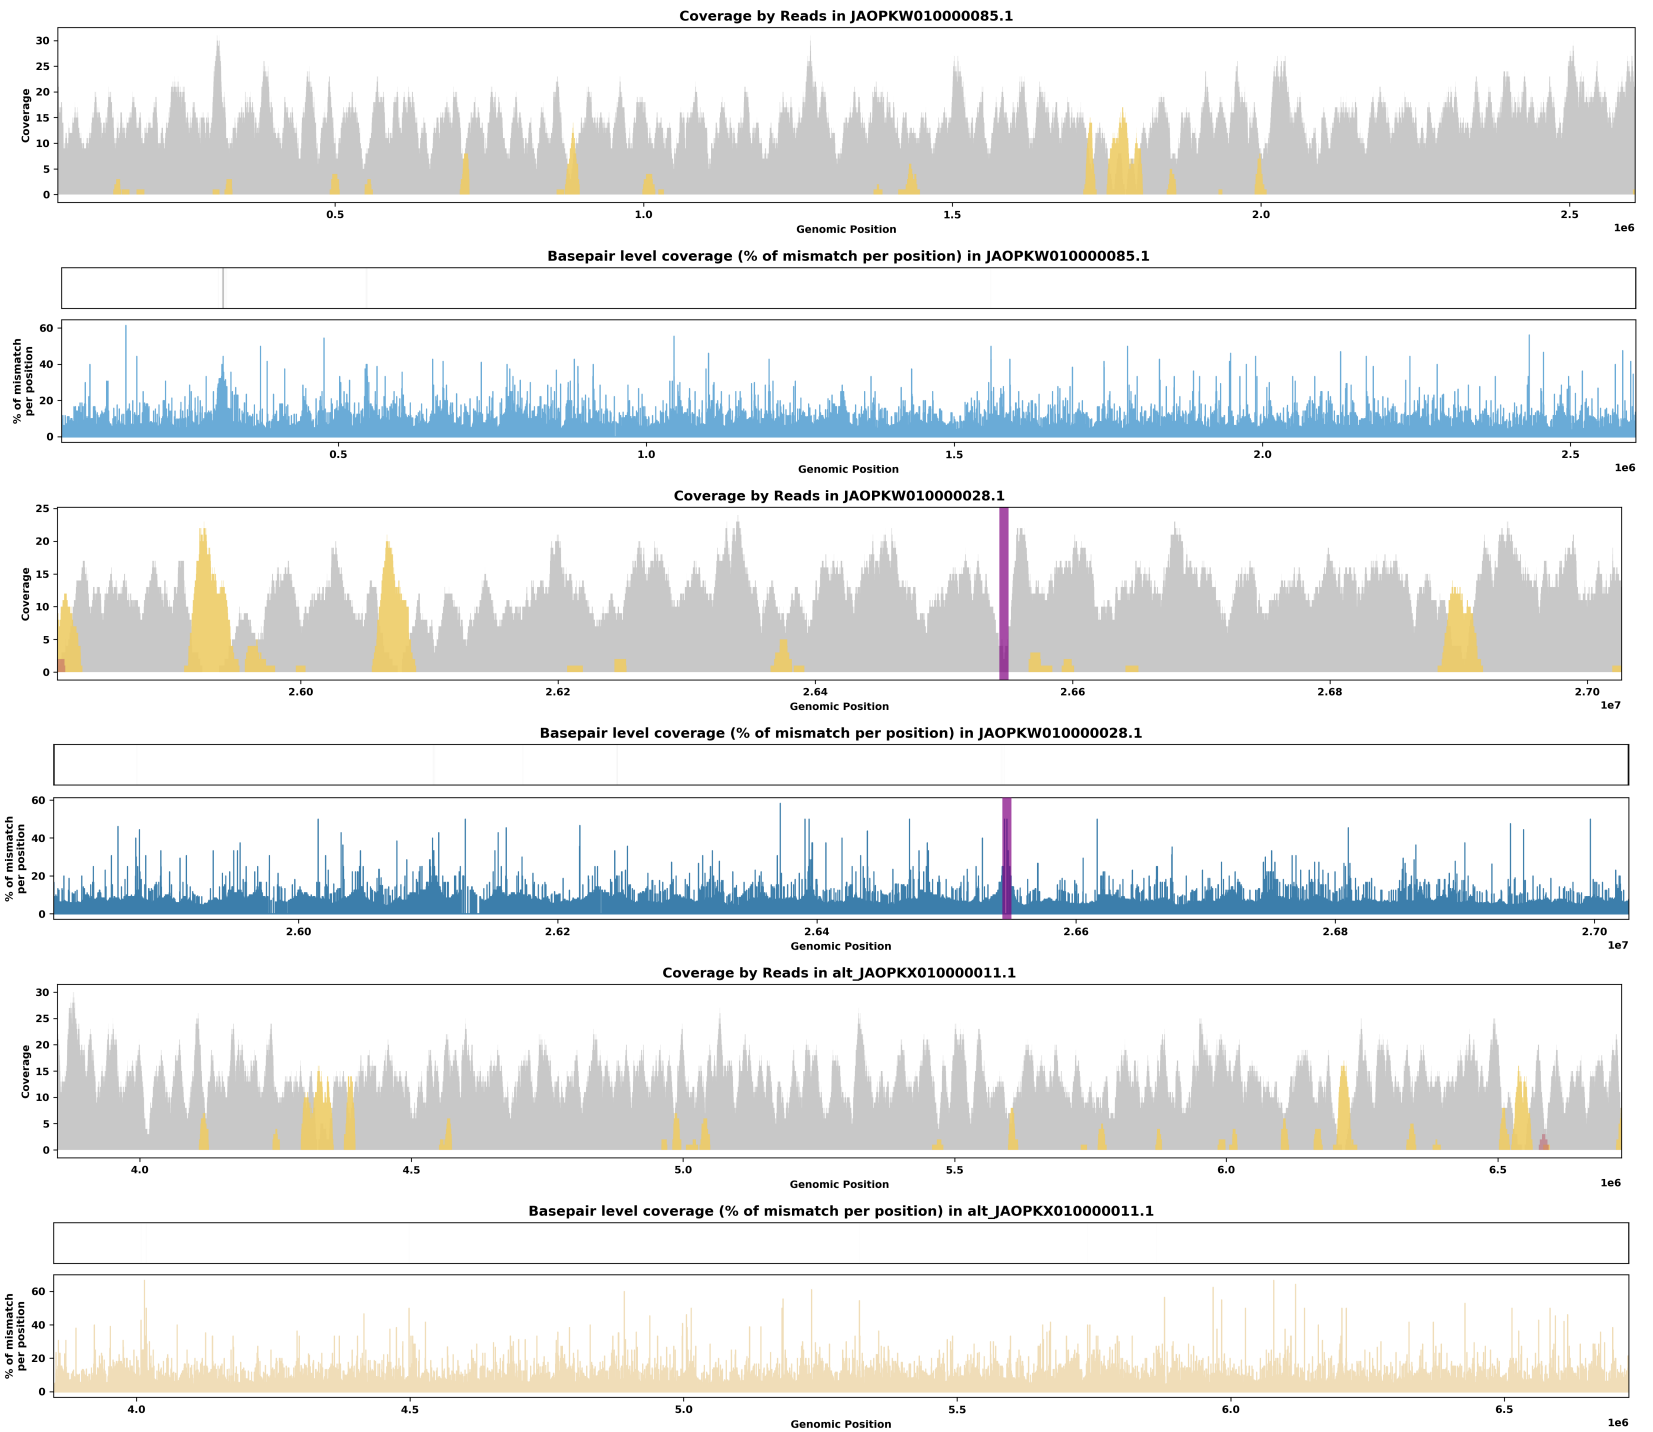

Species ID: mPhoPho1  
 Common Name: harbor porpoise  
 Scientific Name: Phocoena phocoena  
 Assembly Type: Not Haplotype Resolved  
 Data Source: VGP

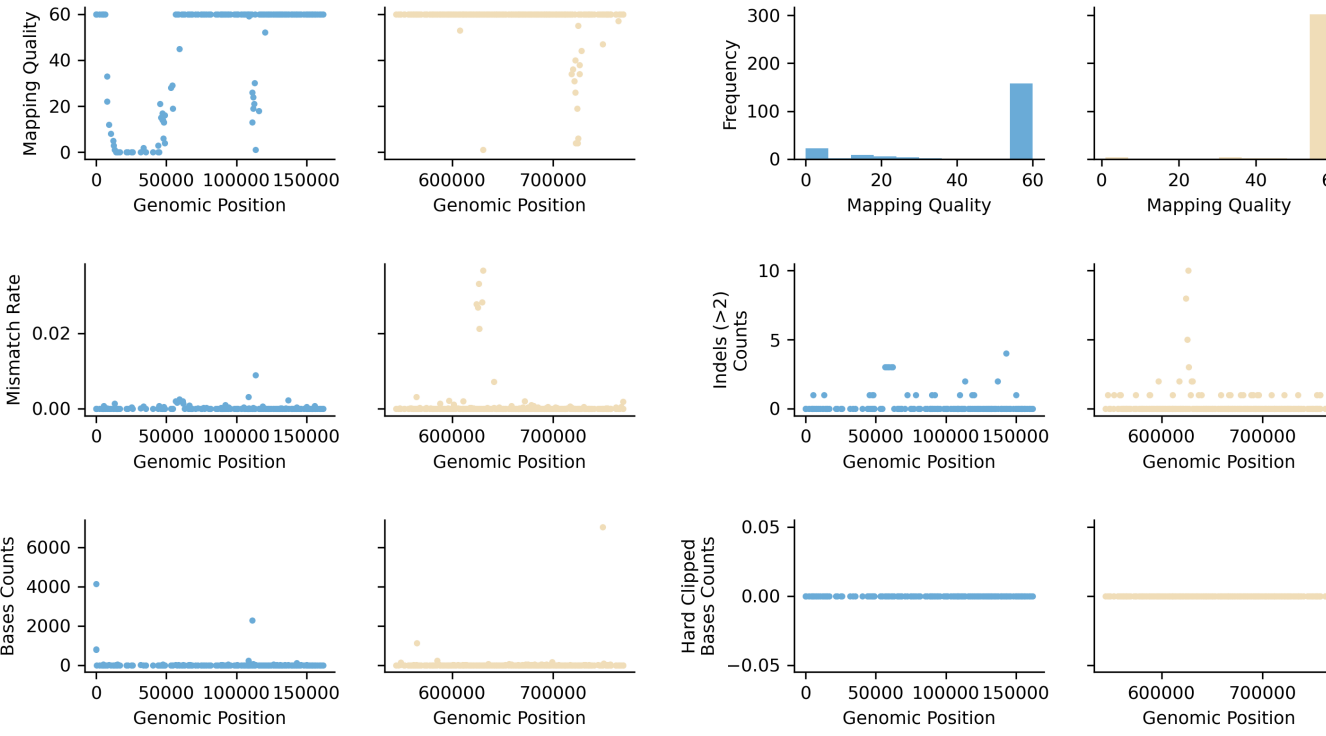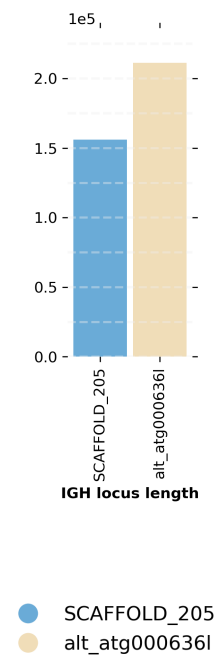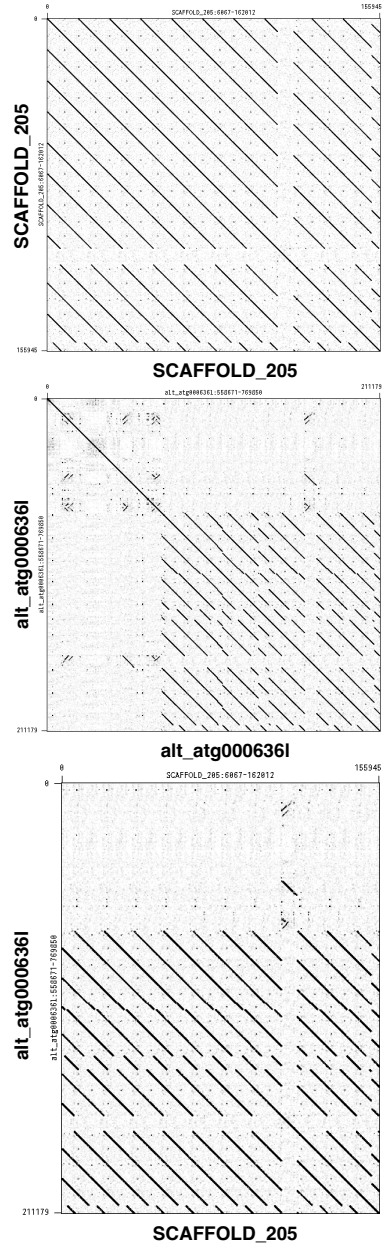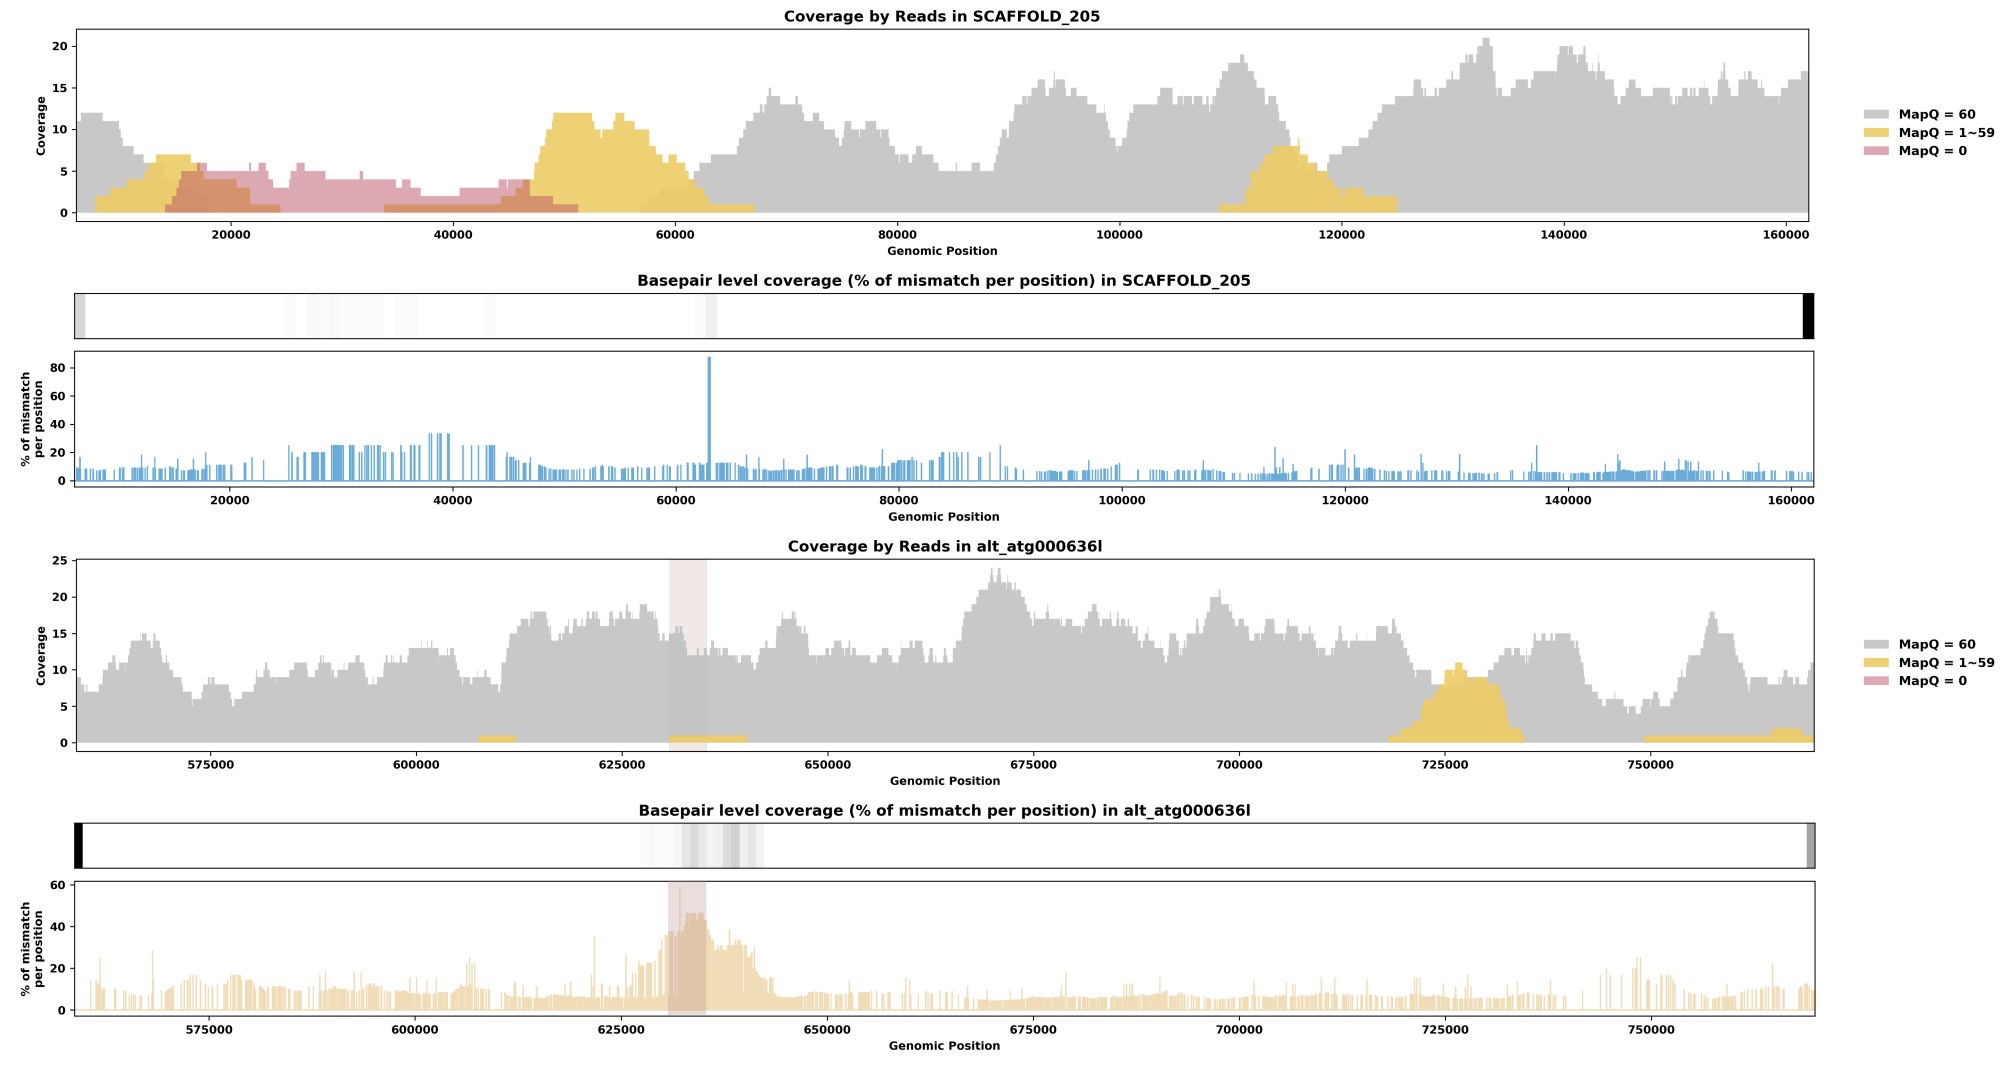

Species ID: mPipPyg2  
 Common Name: soprano pipistrelle  
 Scientific Name: *Pipistrellus pygmaeus*  
 Assembly Type: Not Haplotype Resolved  
 Data Source: VGP

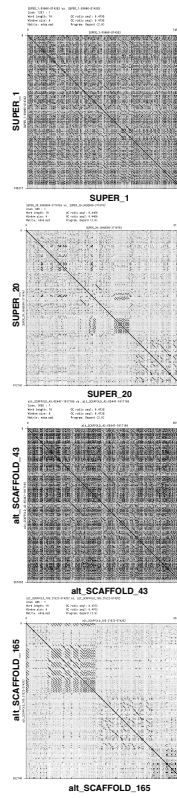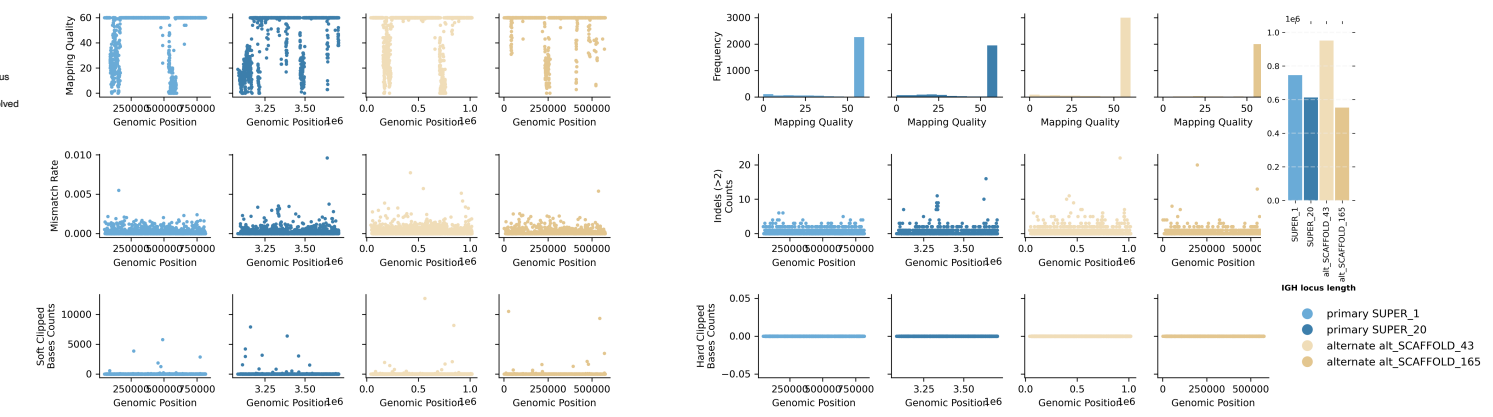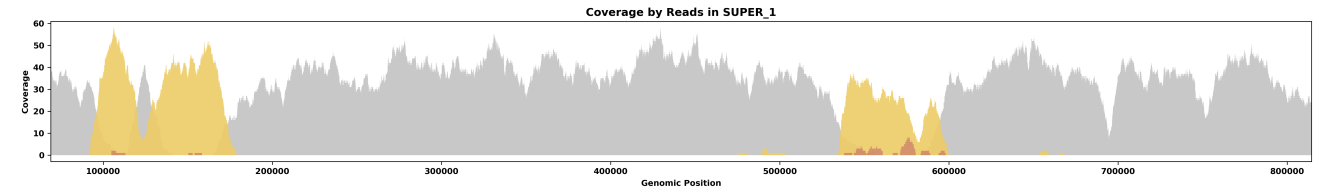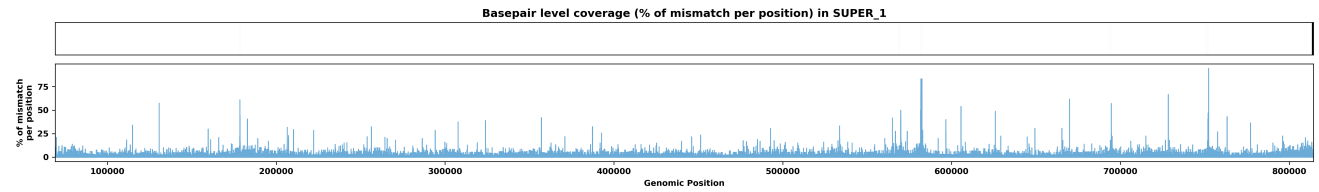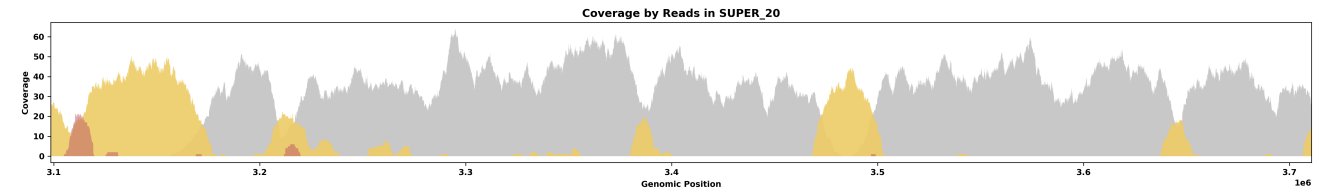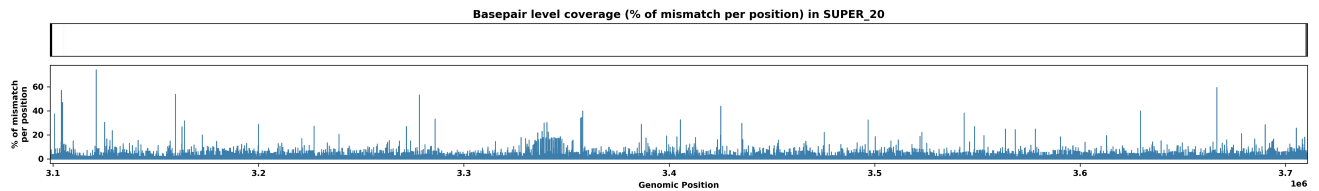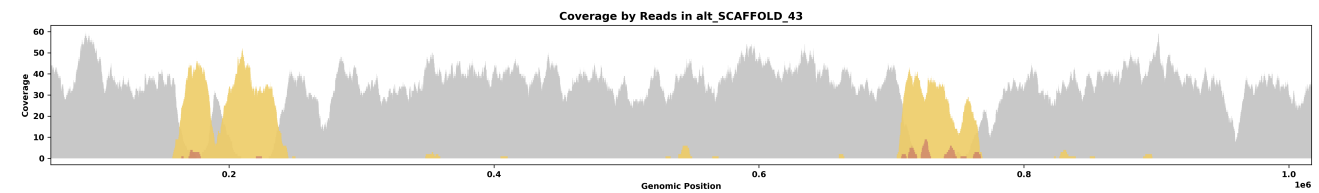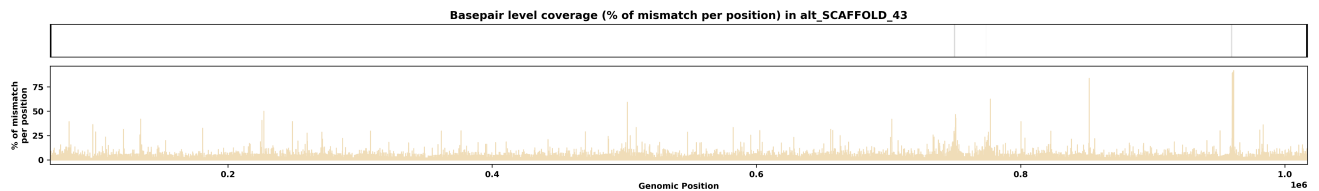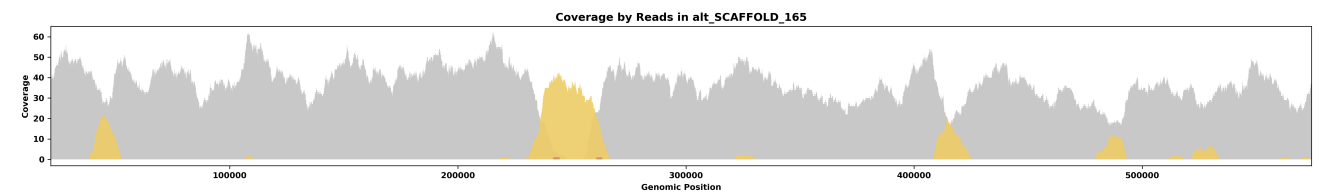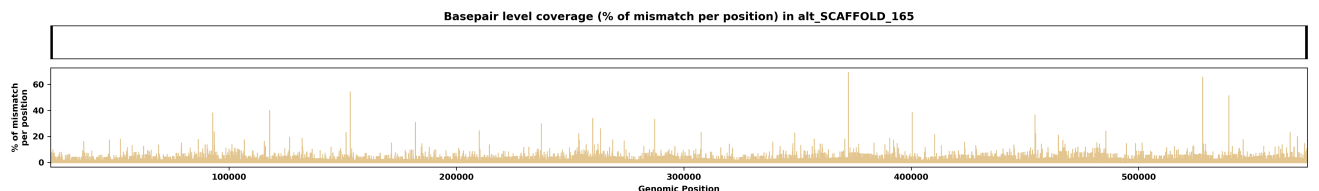

Species ID: mPleAur1  
 Common Name: brown big-eared bat  
 Scientific Name: Plecotus auritus  
 Assembly Type: Not Haplotype Resolved  
 Data Source: VGP

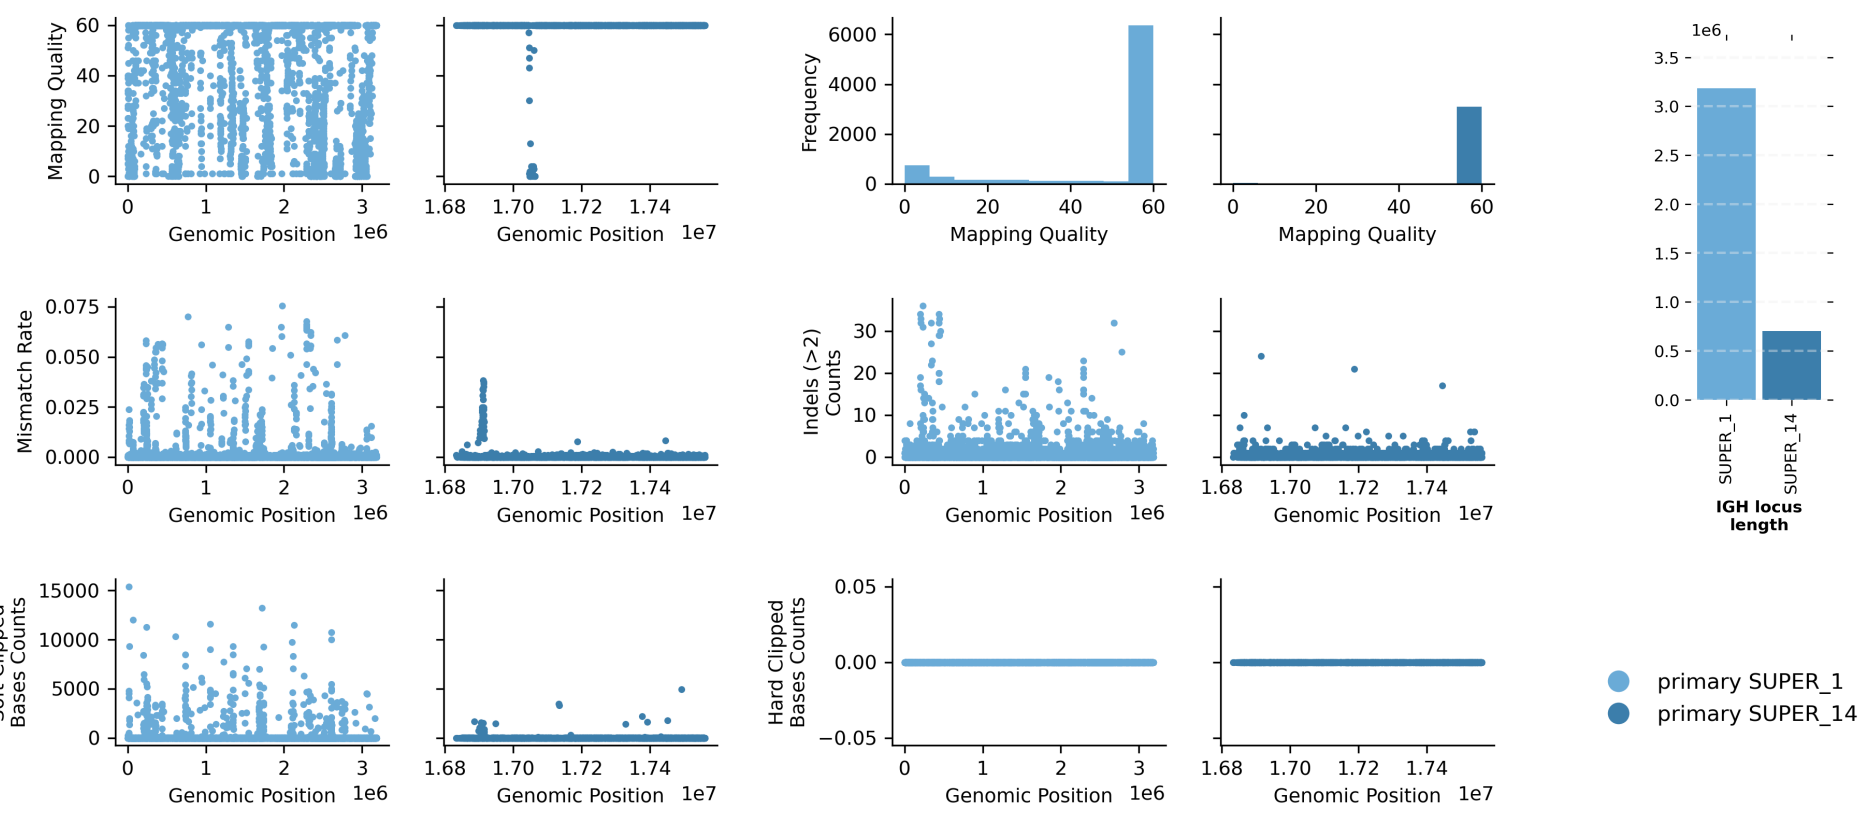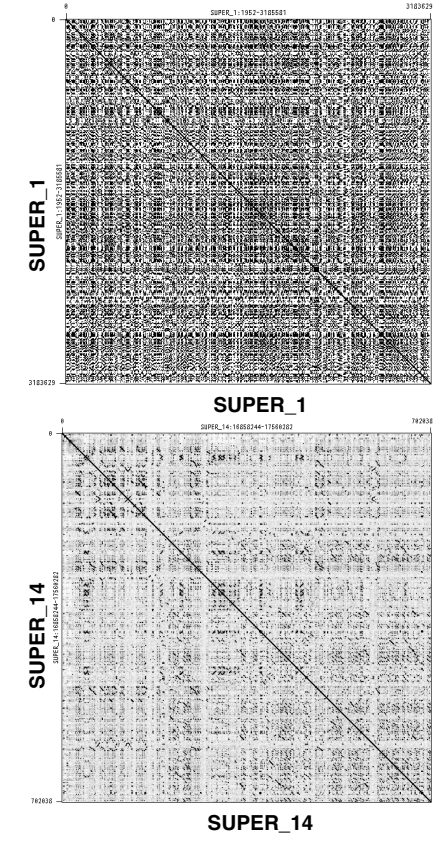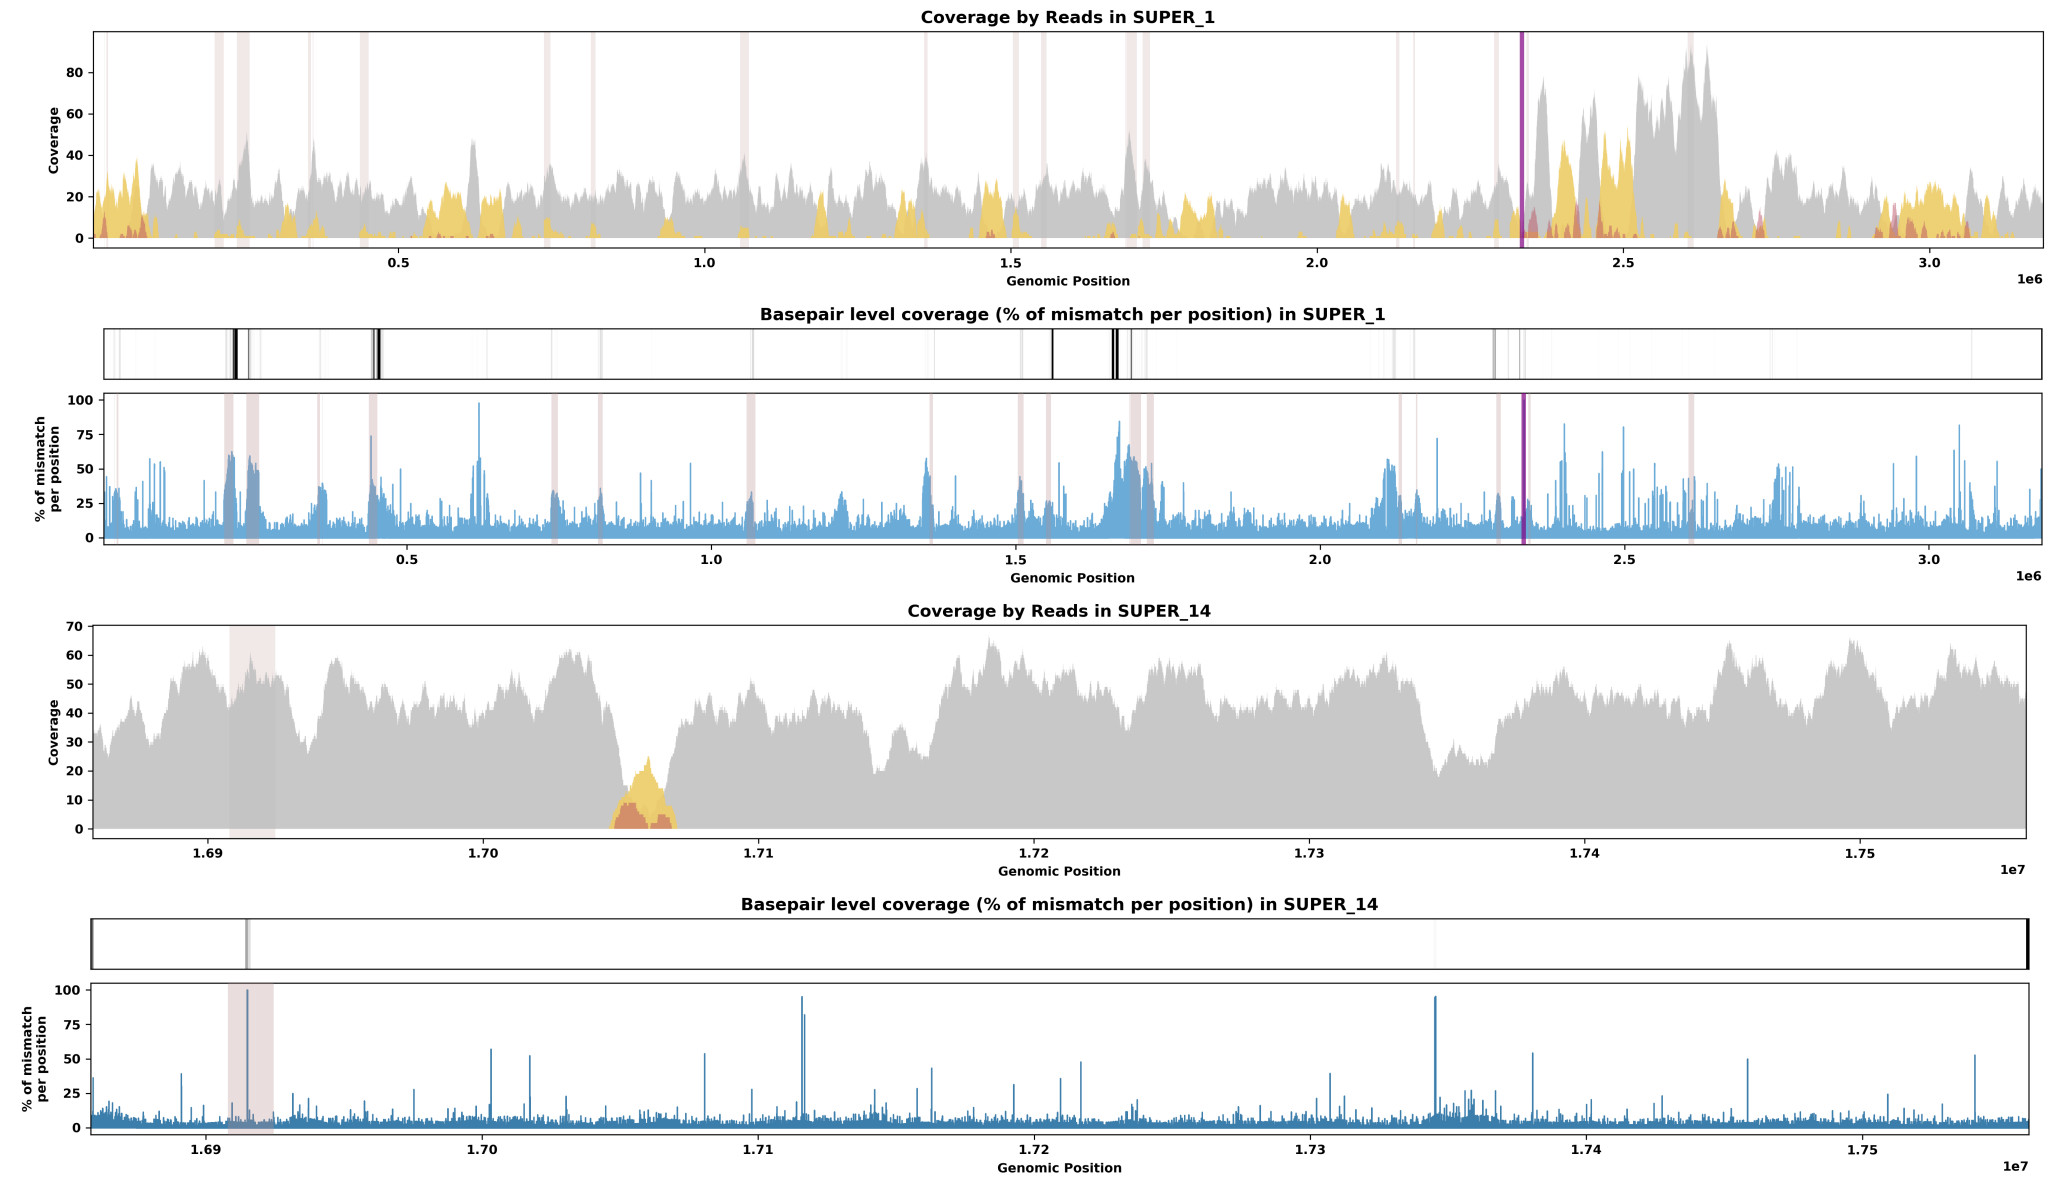



Species ID: mPonAbe1

Common Name: Sumatran orangutan

Scientific Name: Pongo\_abelii

Assembly Type: Haplotype Resolved

Data Source: T2T Primate

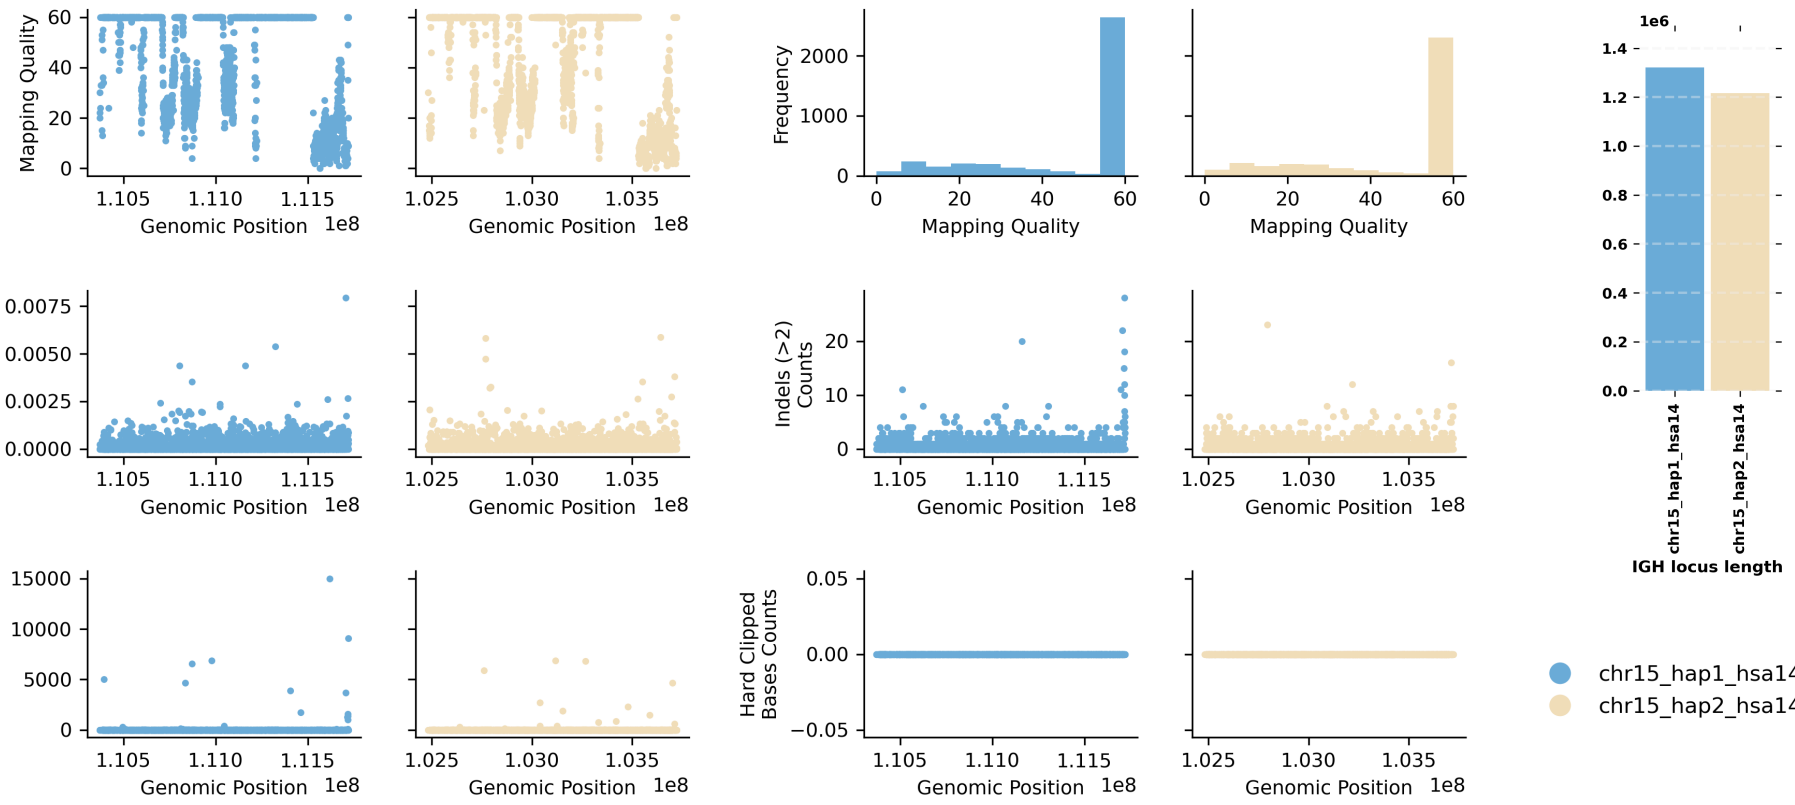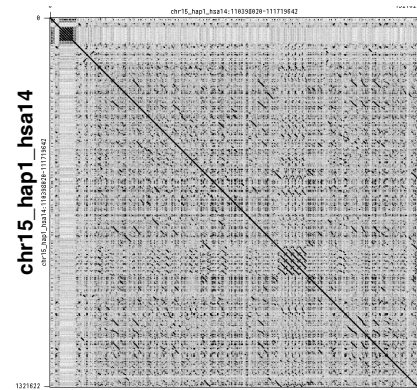

chr15\_hap1\_hsa14

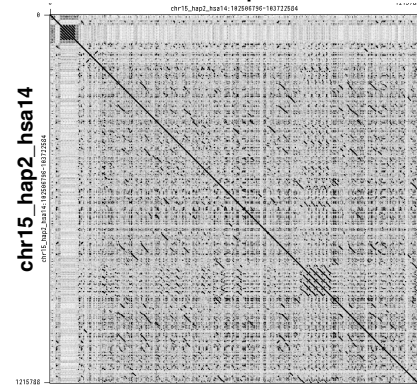

chr15\_hap2\_hsa14

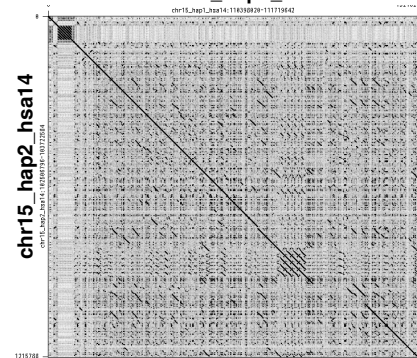

chr15\_hap1\_hsa14

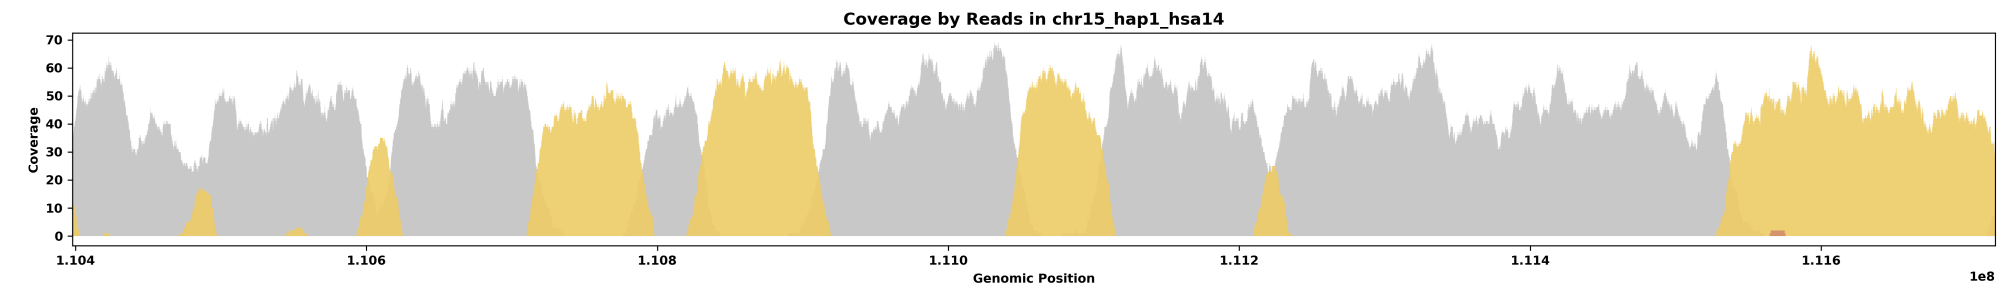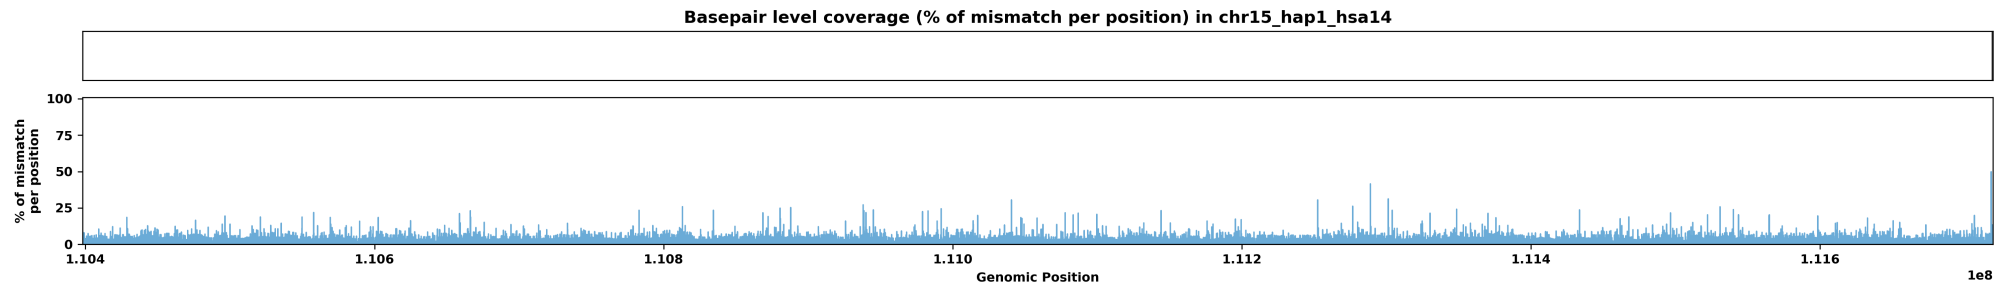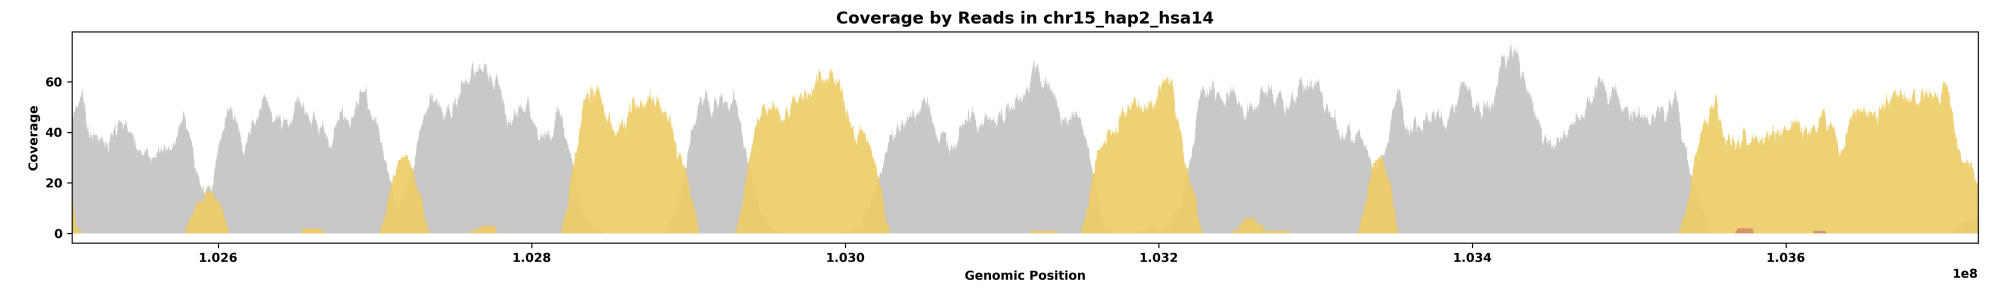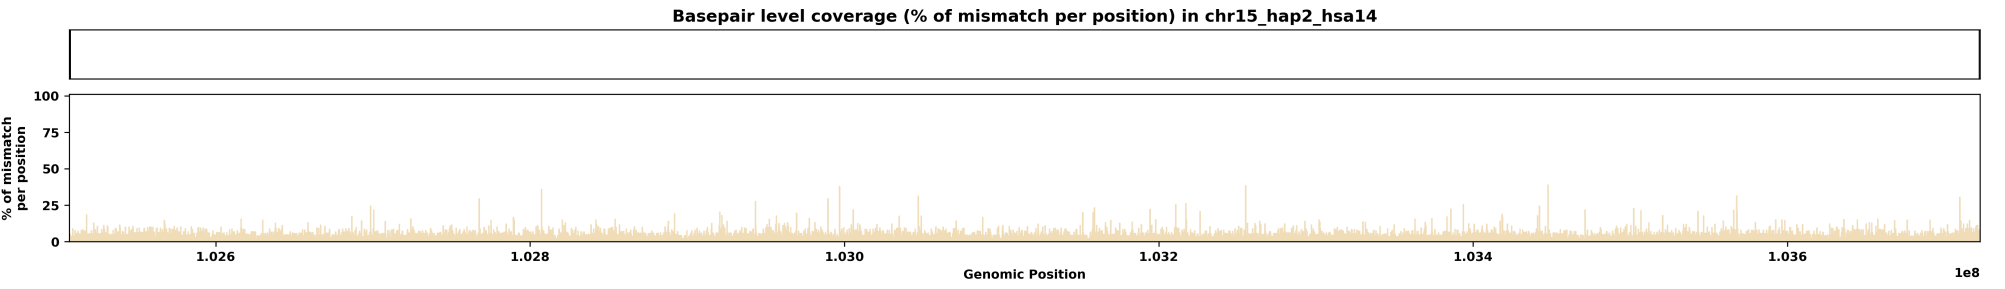

Species ID: mPonPyg2

Common Name: Bornean orangutan

Scientific Name: Pongo\_pygmaeus

Assembly Type: Haplotype Resolved

Data Source: T2T Primate

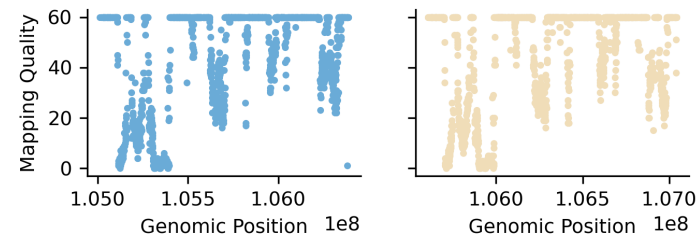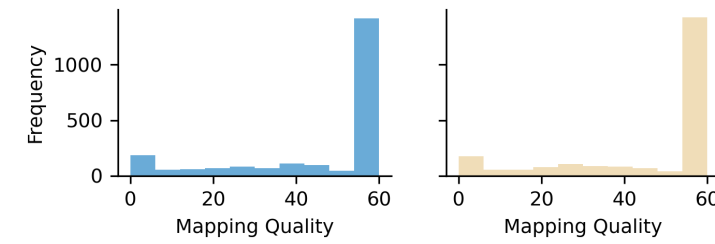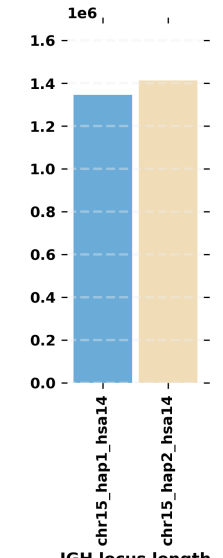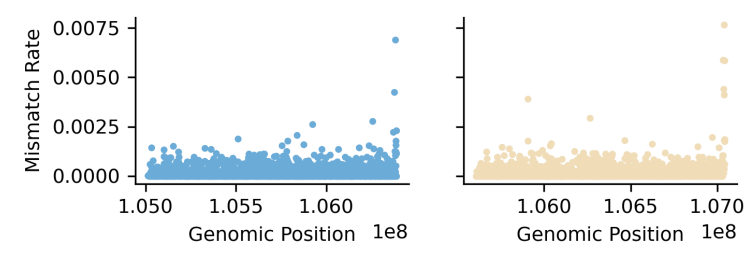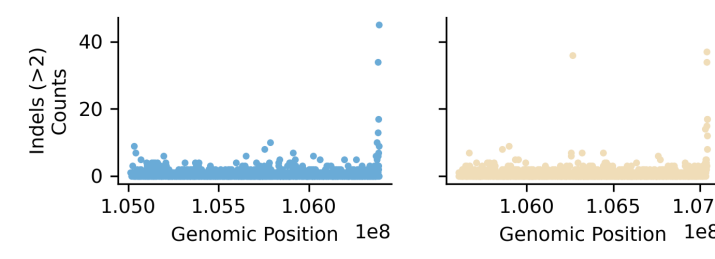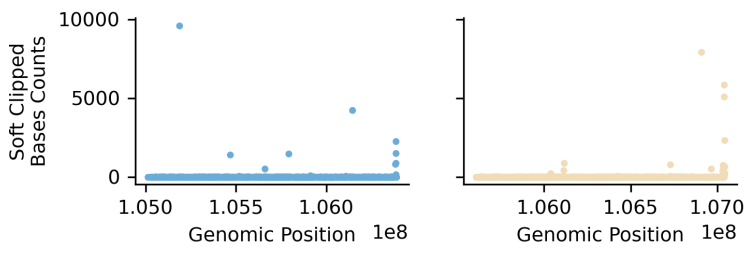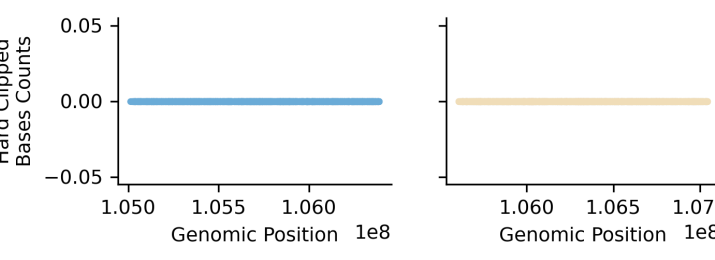

● chr15\_hap1\_hsa14  
● chr15\_hap2\_hsa14

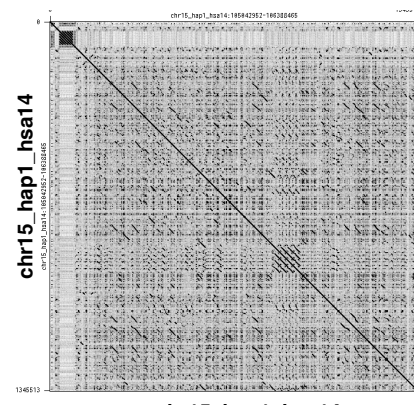

chr15\_hap1\_hsa14

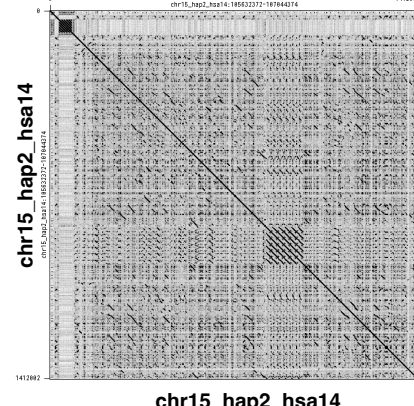

chr15\_hap2\_hsa14

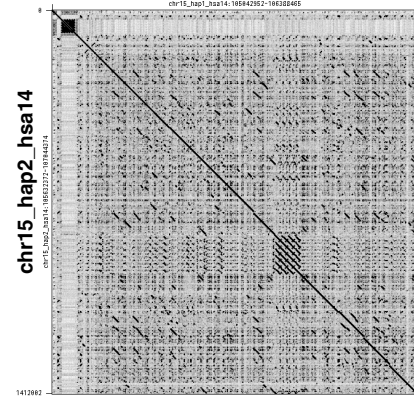

chr15\_hap1\_hsa14

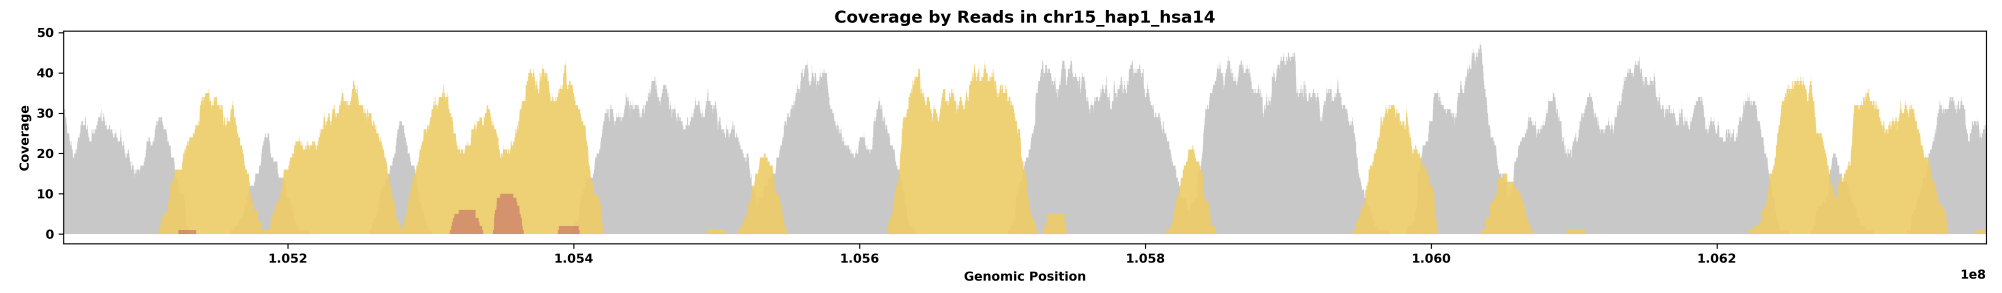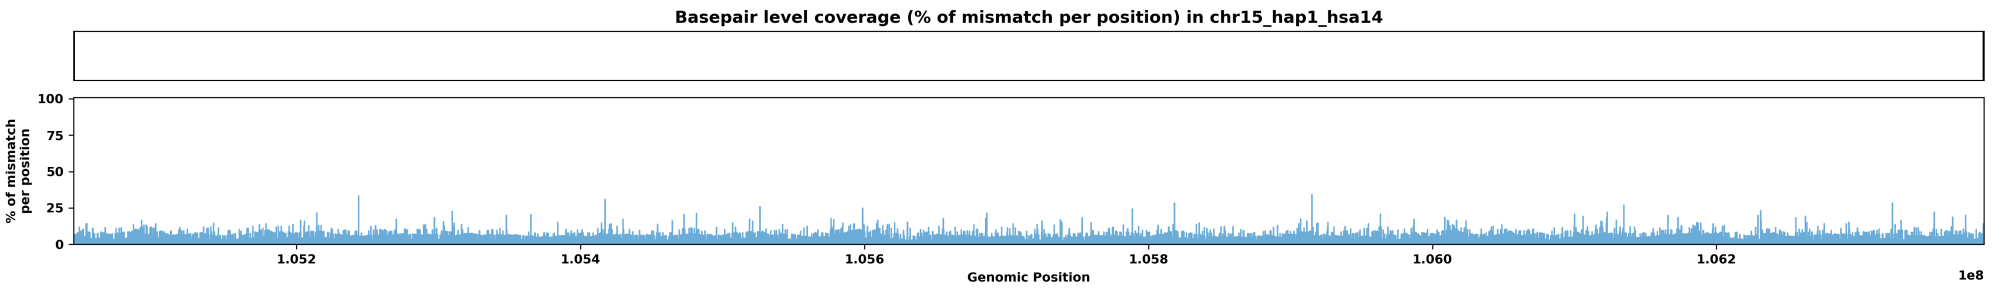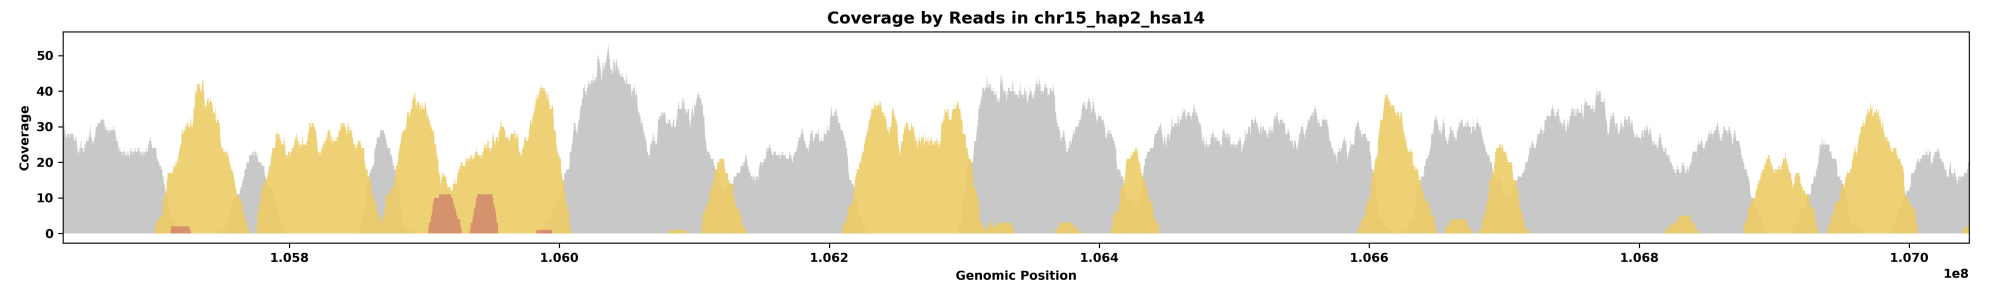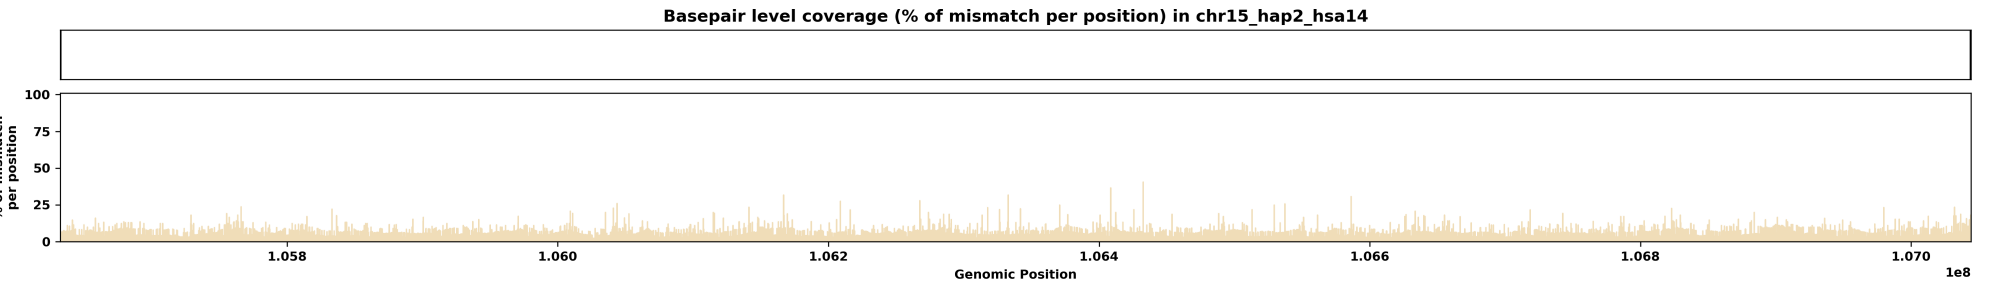

■ MapQ = 60  
■ MapQ = 1-59  
■ MapQ = 0

■ MapQ = 60  
■ MapQ = 1-59  
■ MapQ = 0

Species ID: mPseCra1  
 Common Name: false killer whale  
 Scientific Name: Pseudorca crassidens  
 Assembly Type: Haplotype Resolved  
 Data Source: VGP

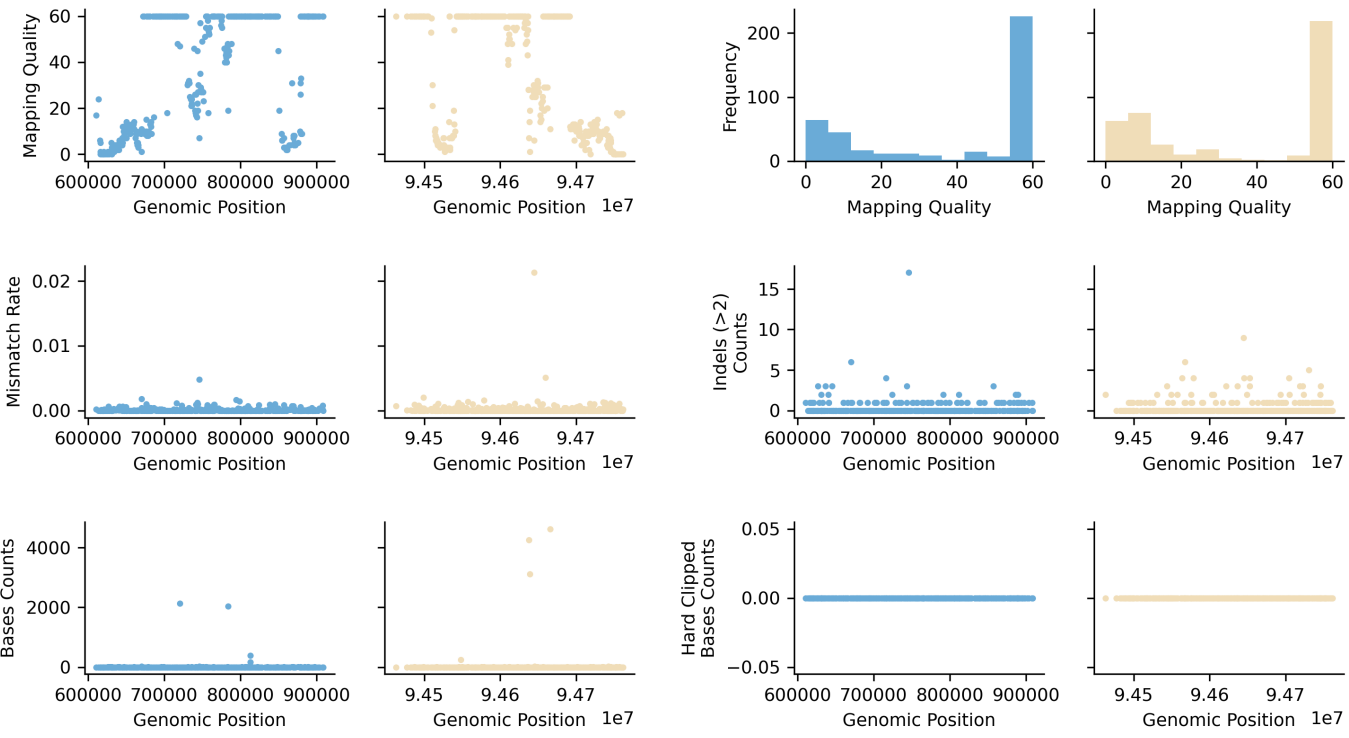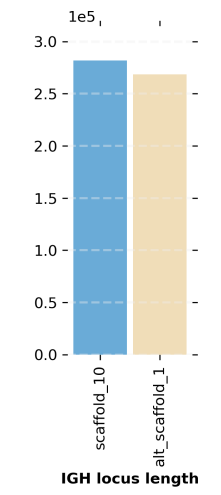

● scaffold\_10  
 ● alt\_scaffold\_1

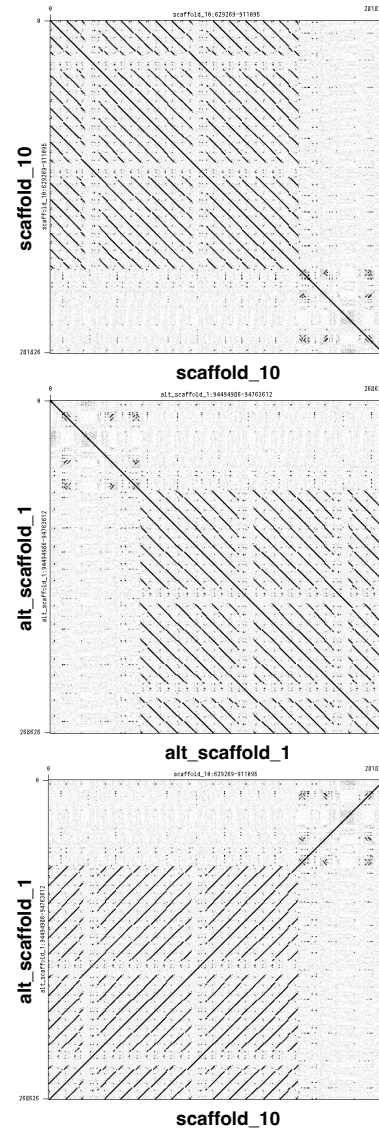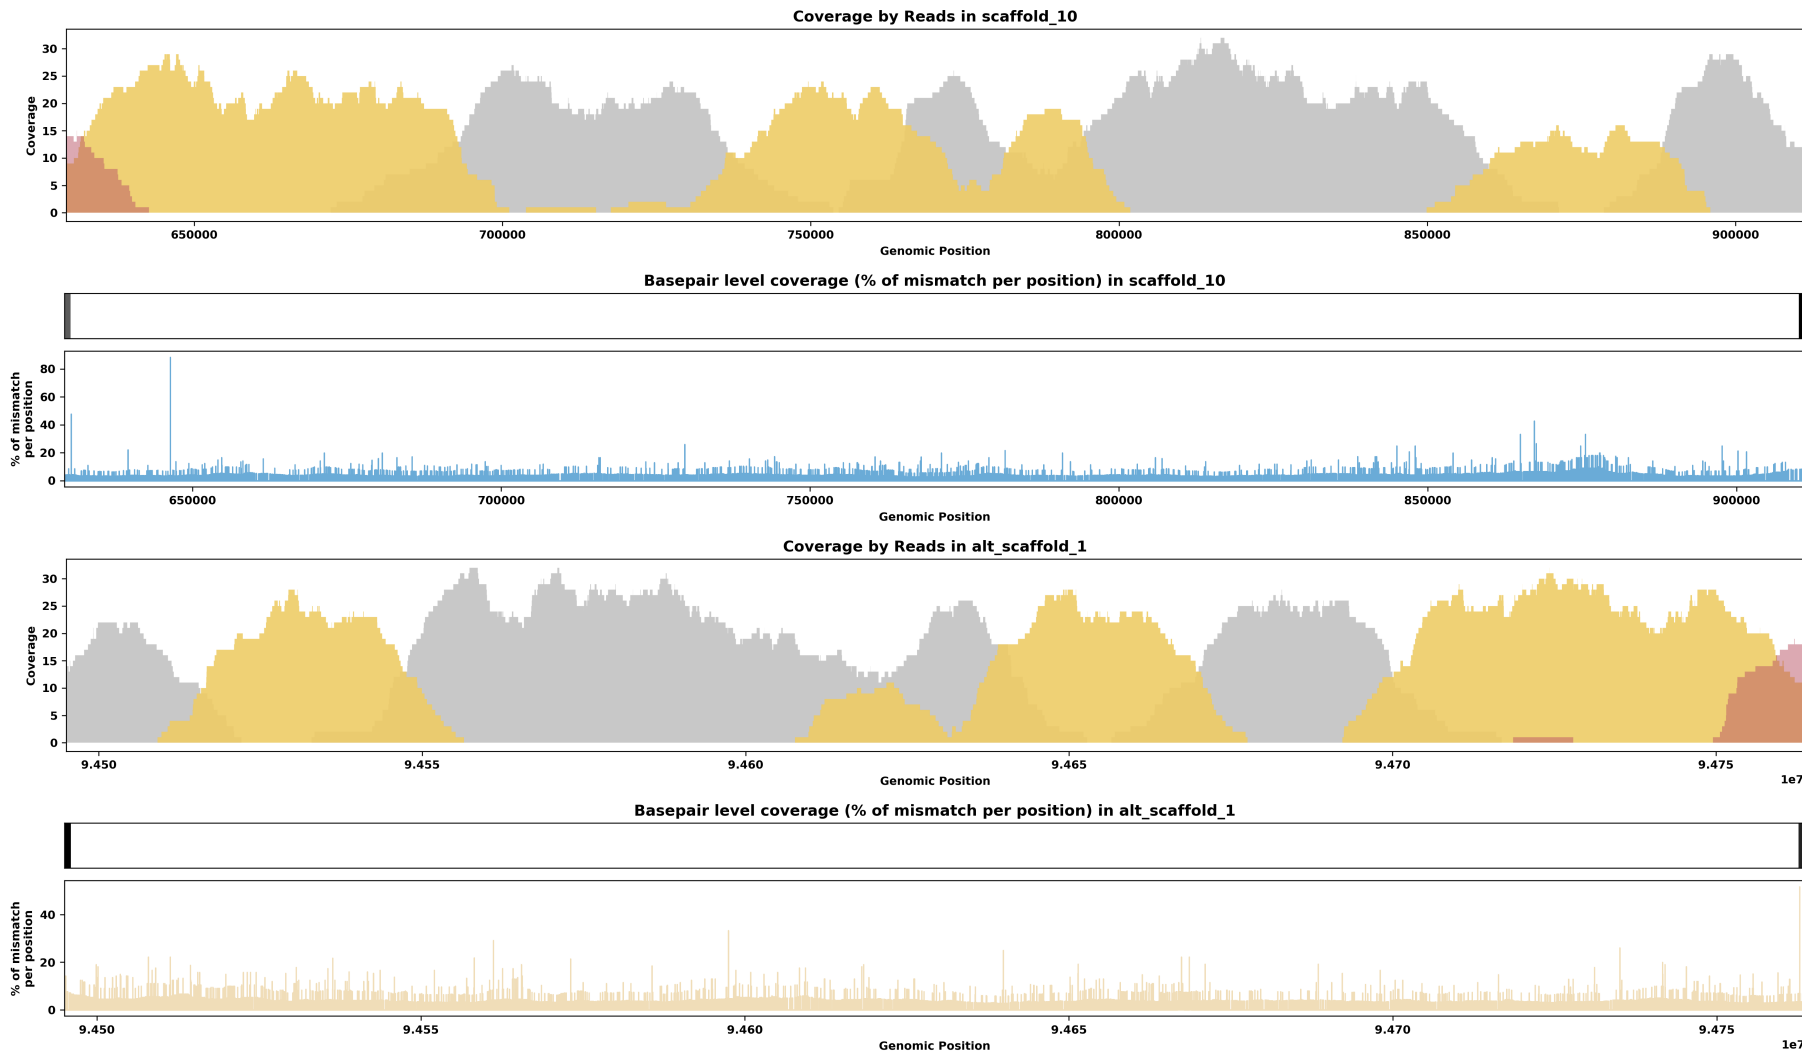

Species ID: mPumCon1  
 Common Name: Mountain Lion  
 Scientific Name: Puma concolor  
 Assembly Type: Haplotype Resolved  
 Data Source: CCGP

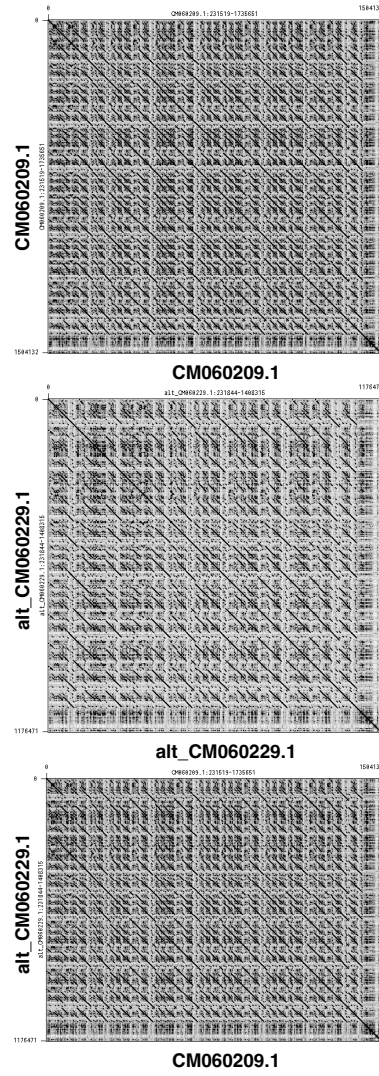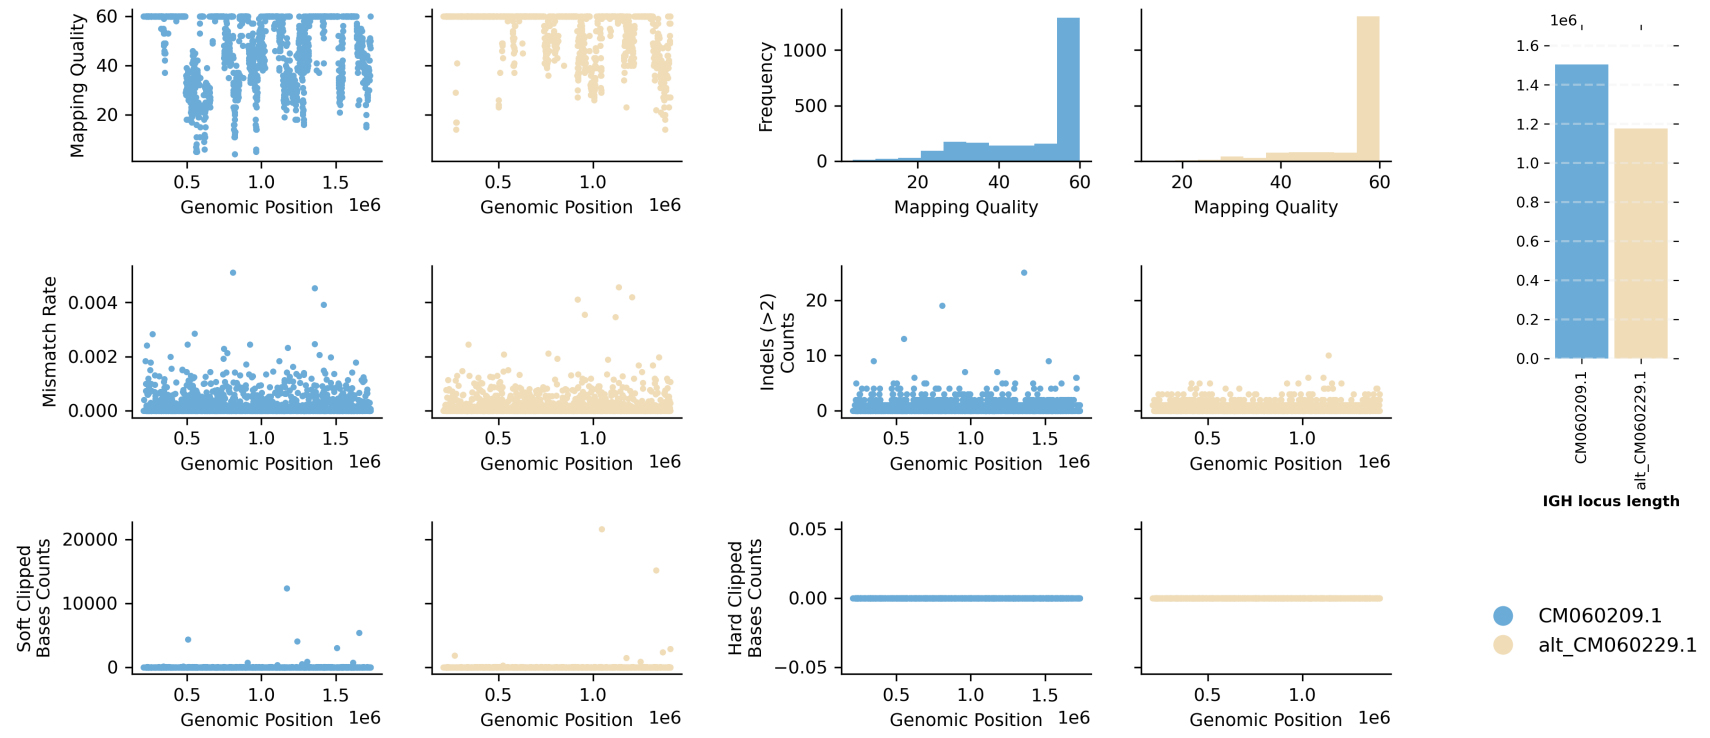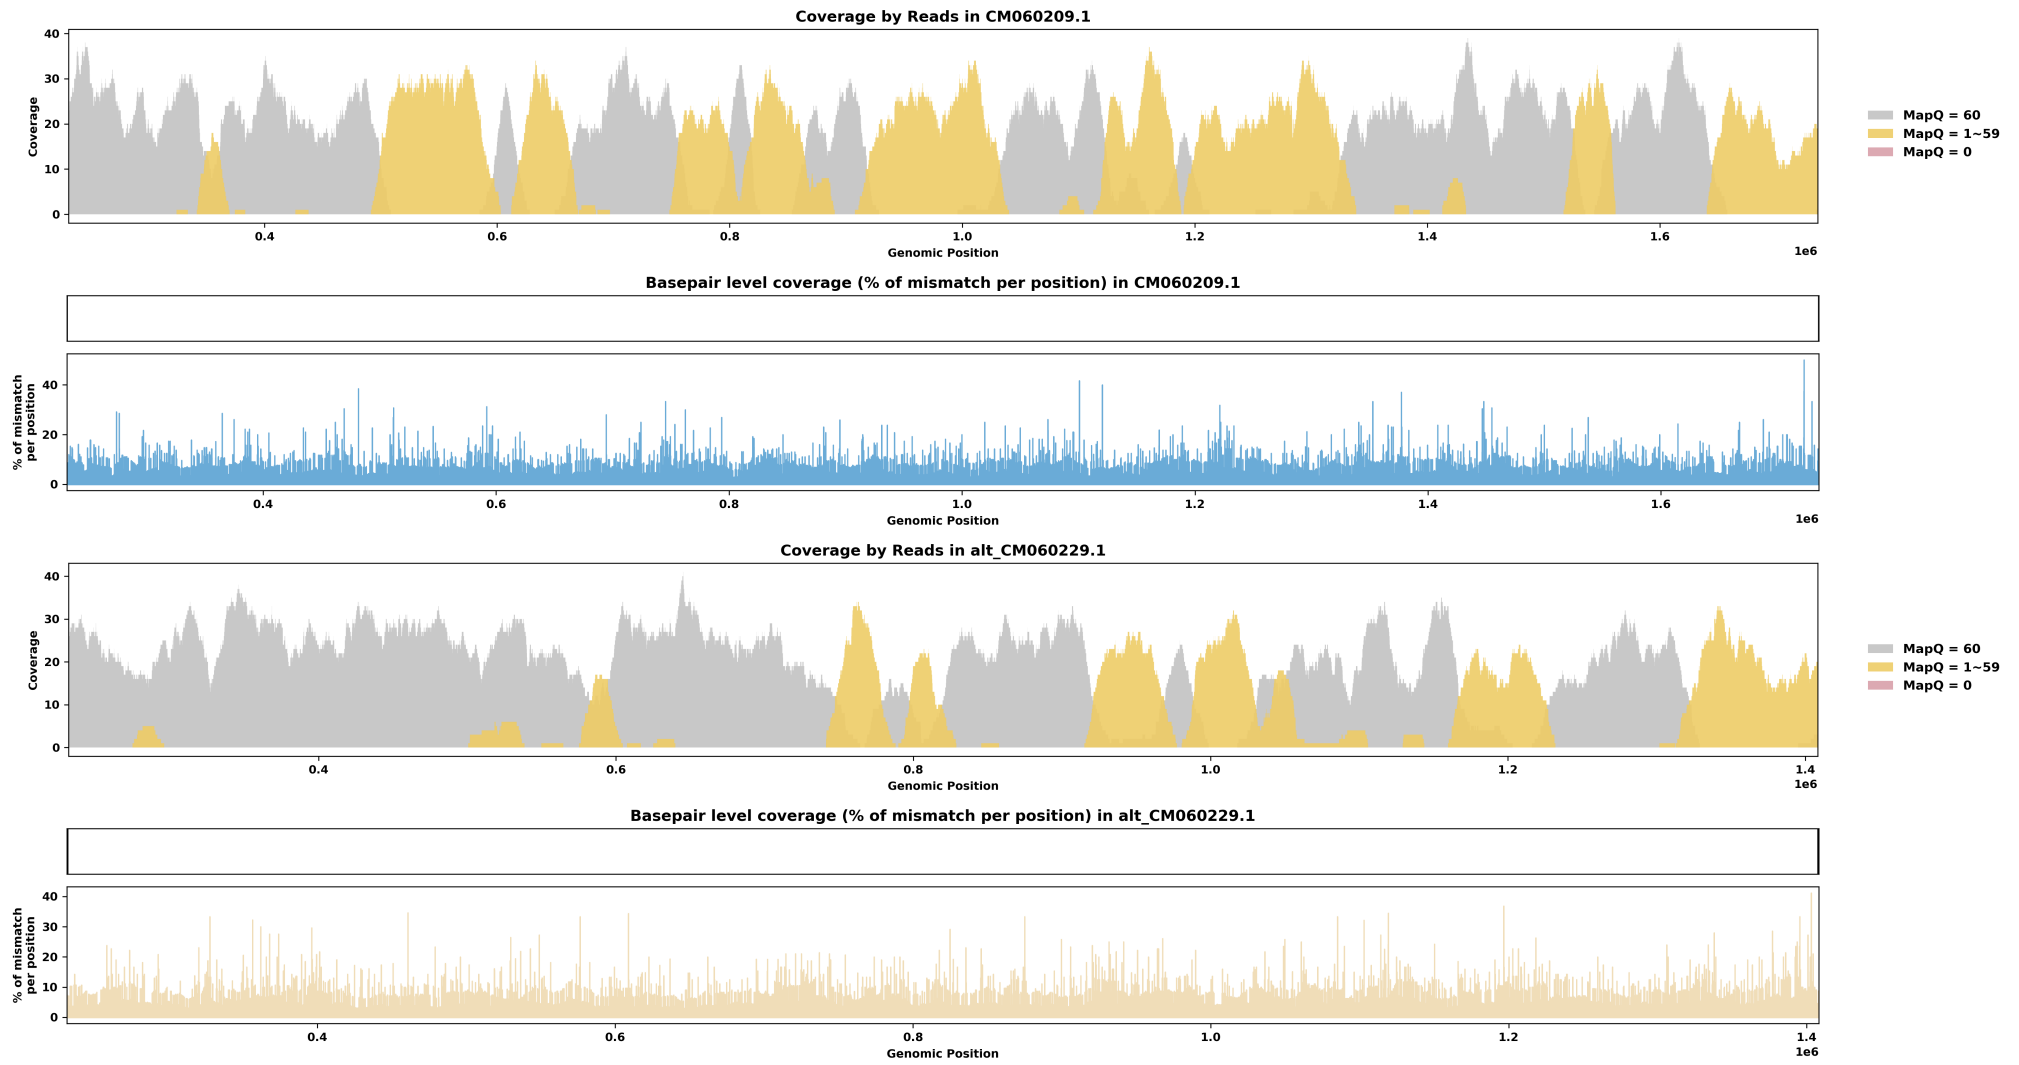

Species ID: mSorAra2

Common Name: Common shrew

Scientific Name: Sorex araneus

Assembly Type: Not Haplotype Resolved

Data Source: VGP

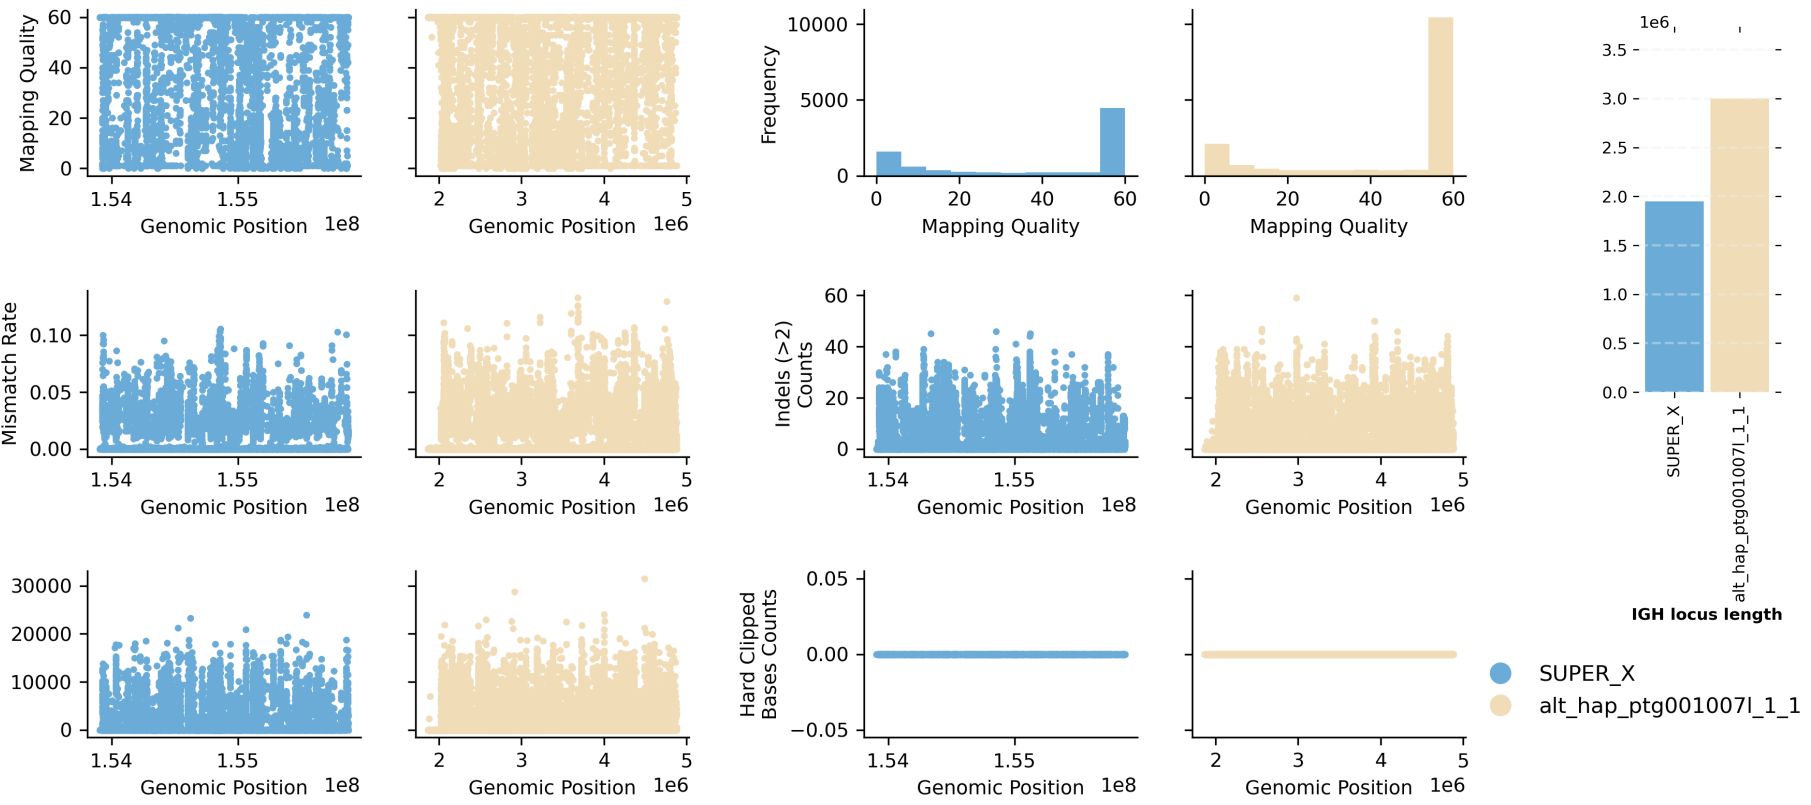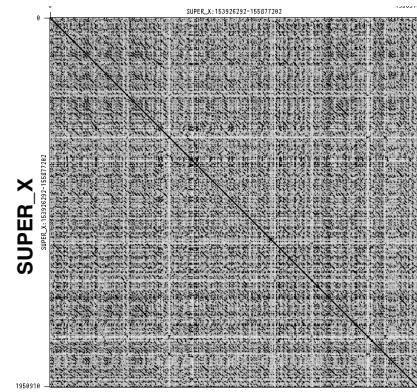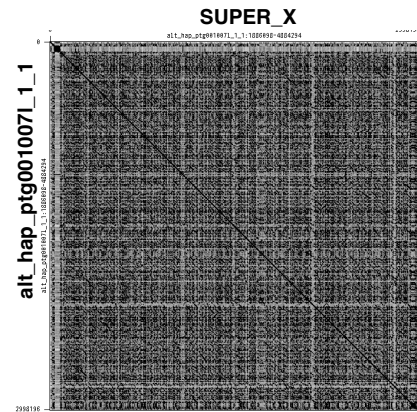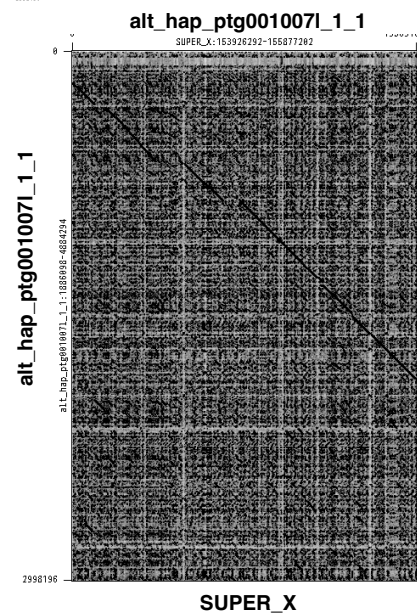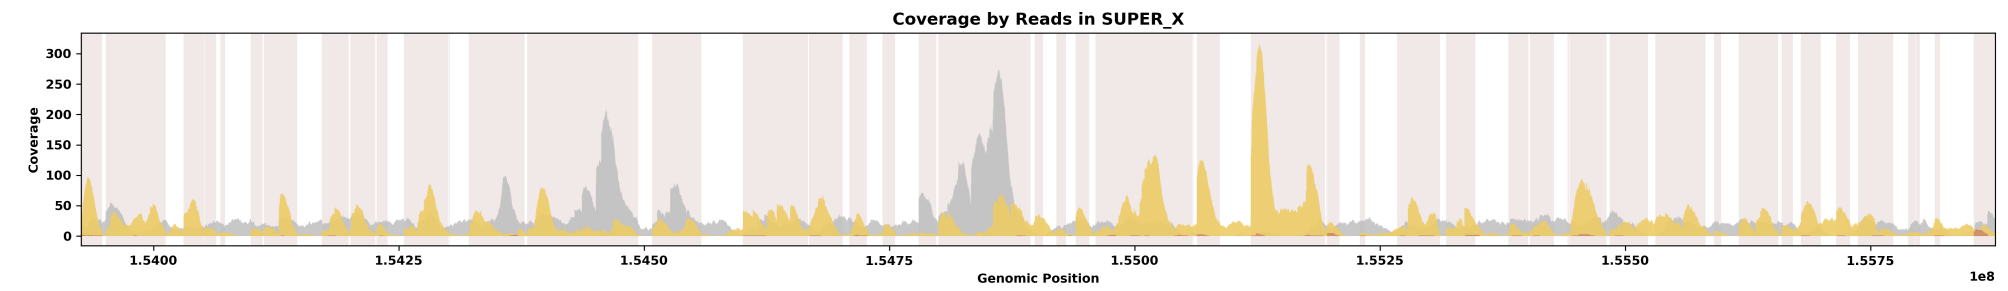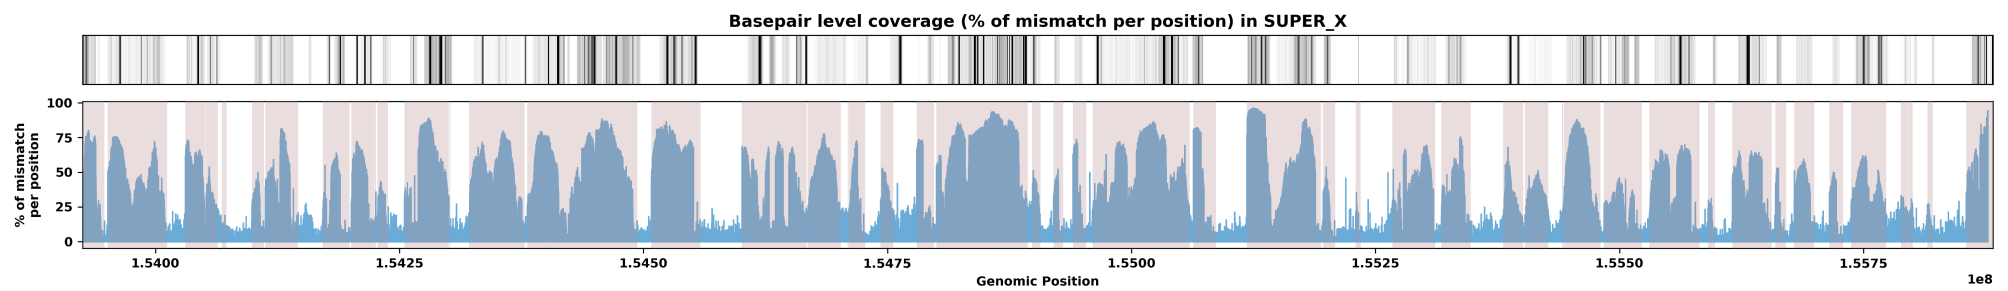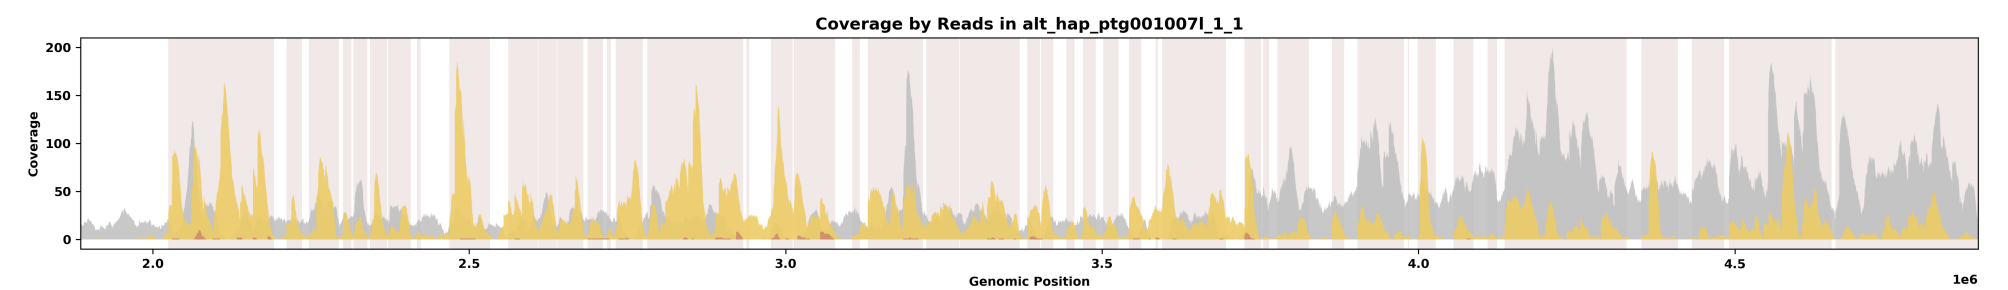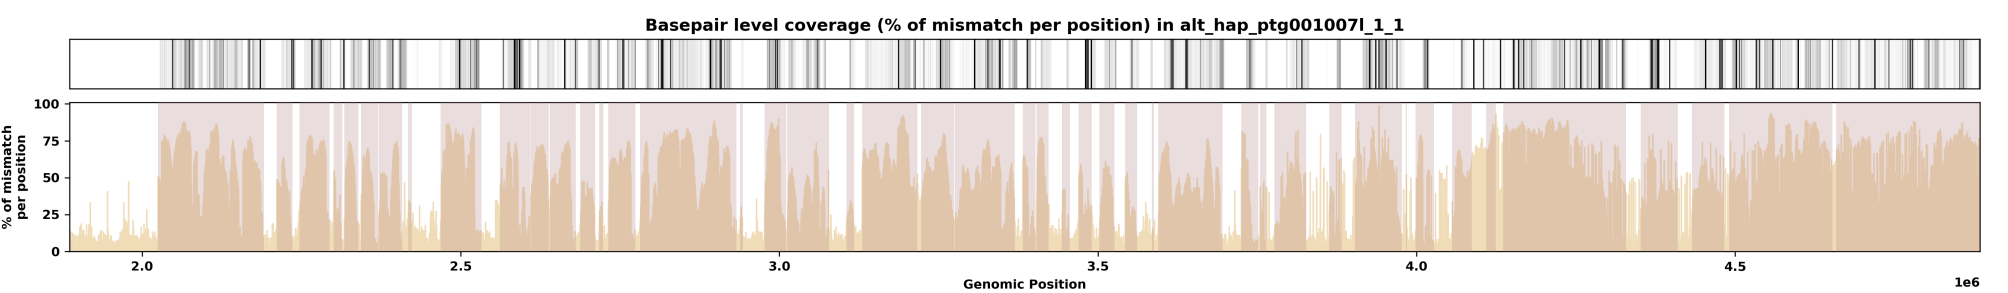

Species ID: mSteCoe1  
 Common Name: striped dolphin  
 Scientific Name: *Stenella coeruleoalba*  
 Assembly Type: Not Haplotype Resolved  
 Data Source: VGP

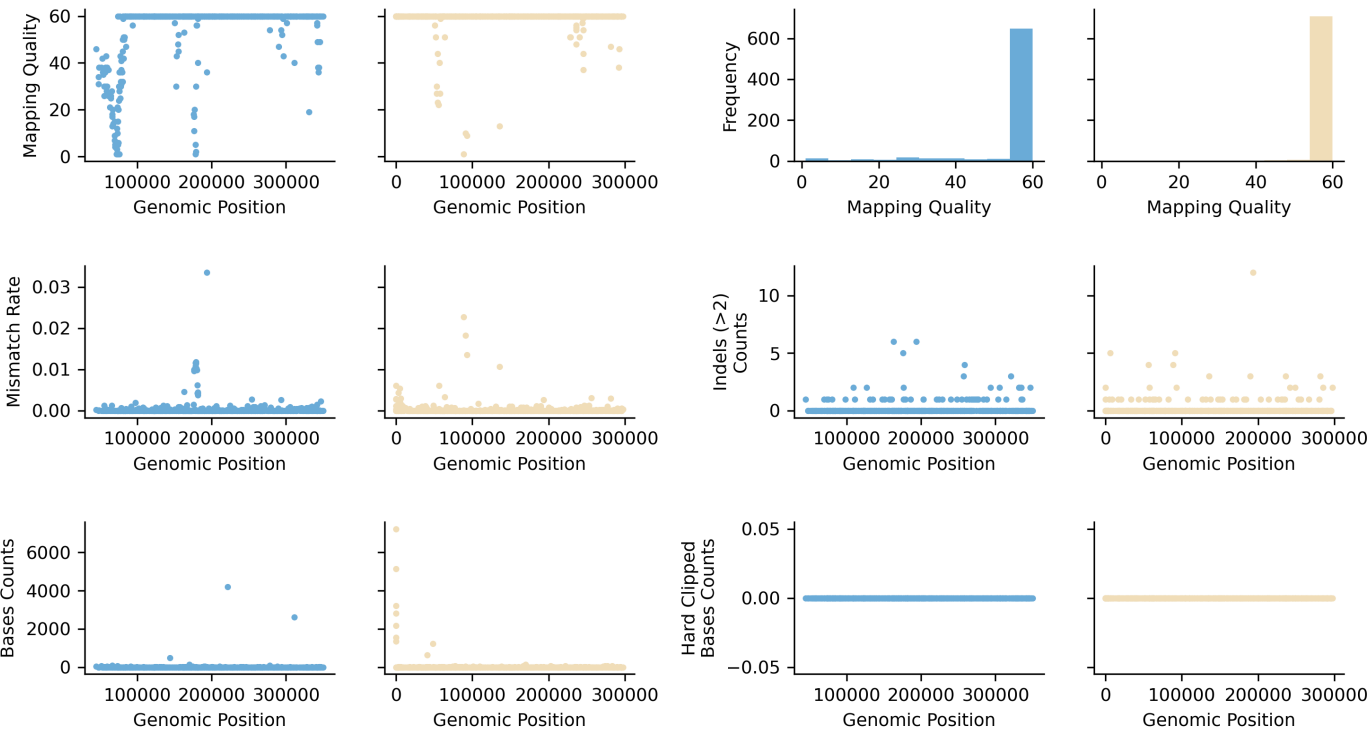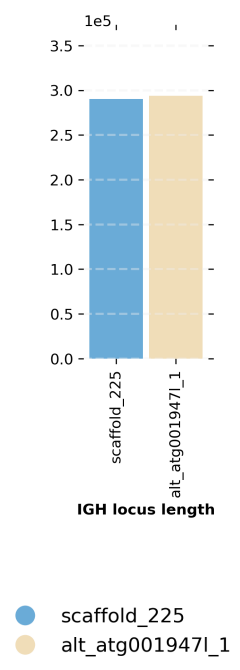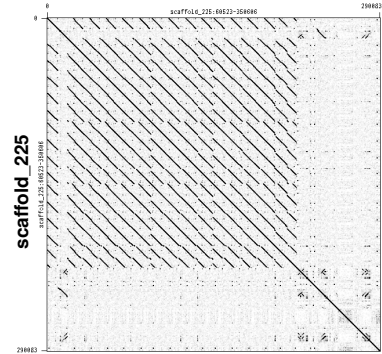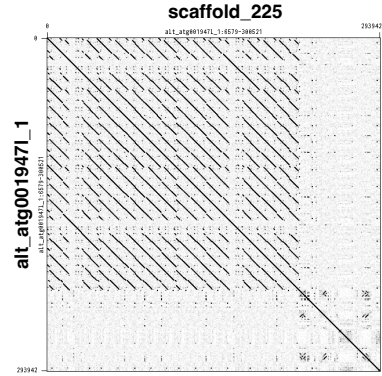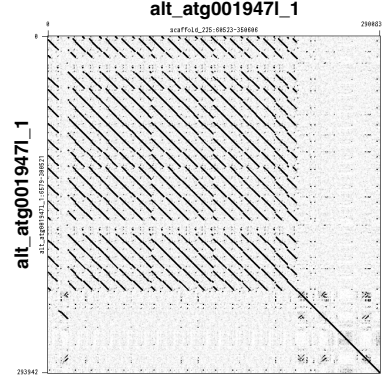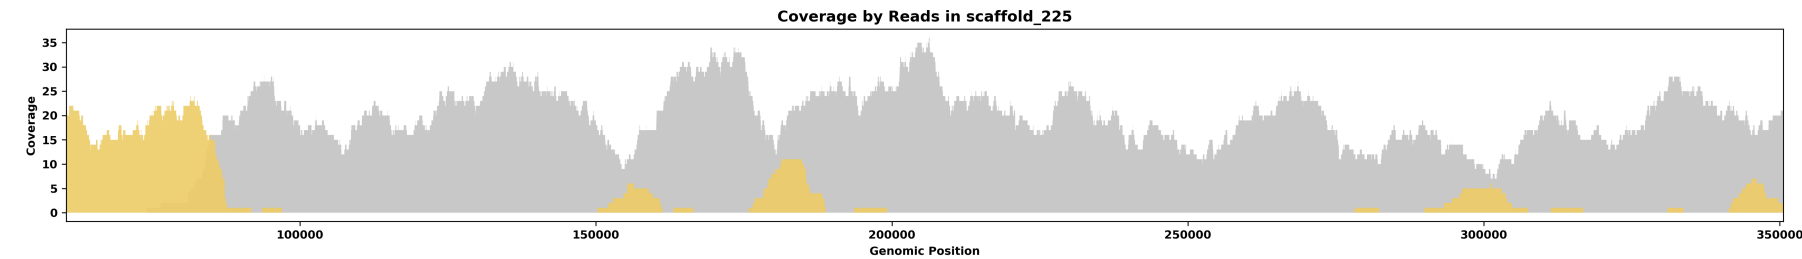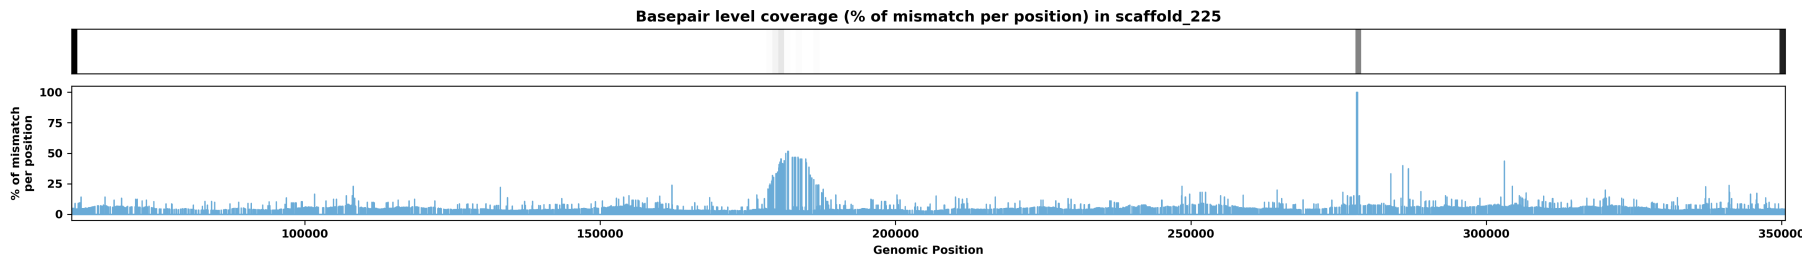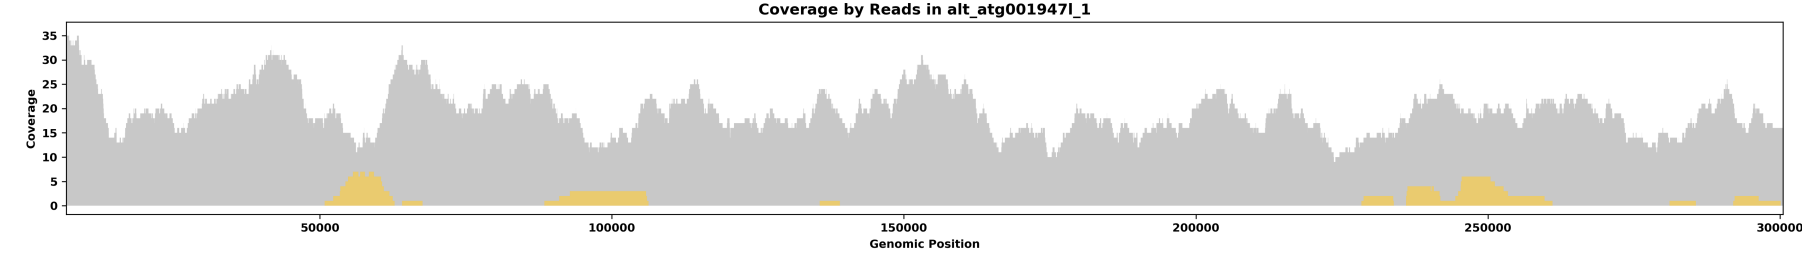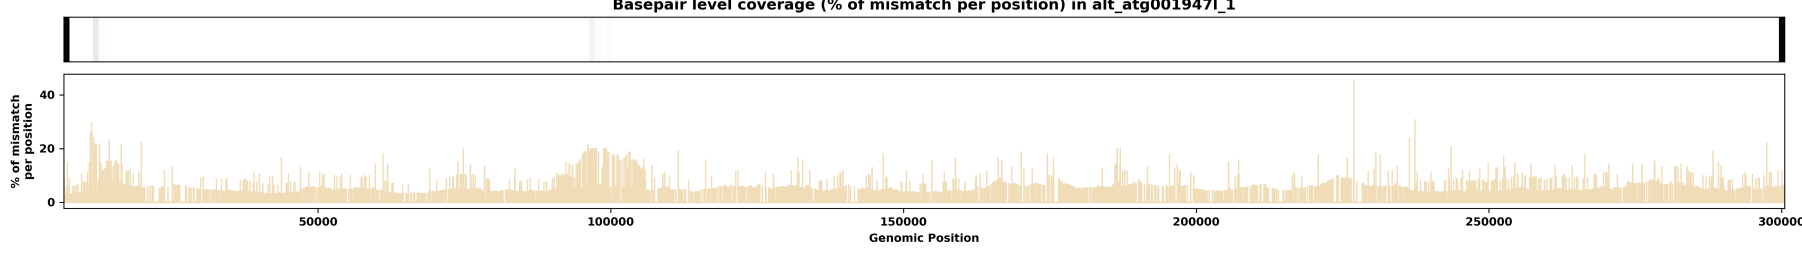

Species ID: mTalEur1

Common Name: European mole

Scientific Name: *Talpa europaea*

Assembly Type: Not Haplotype Resolved

Data Source: VGP

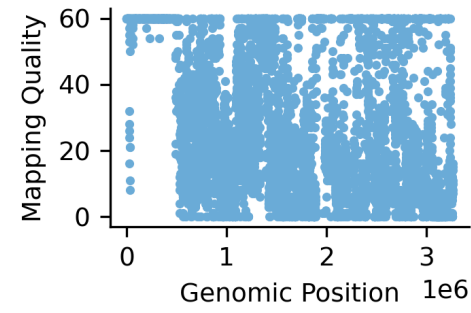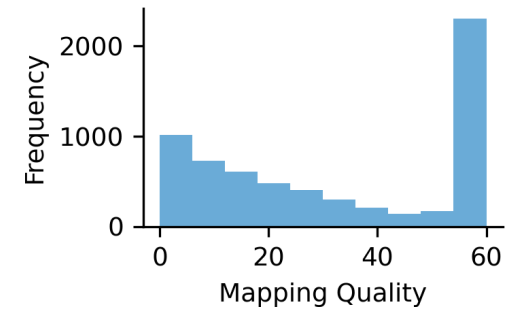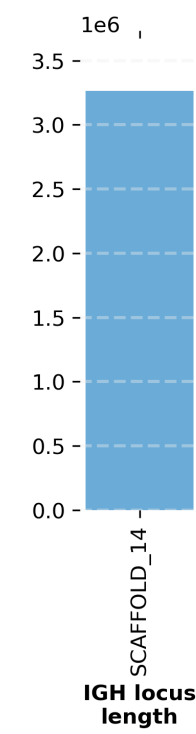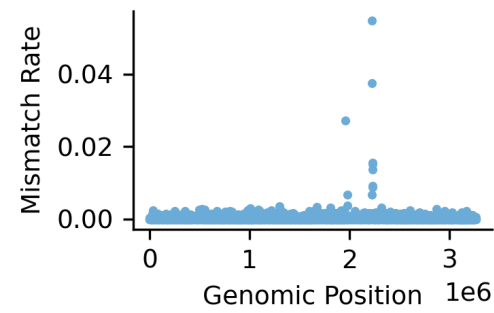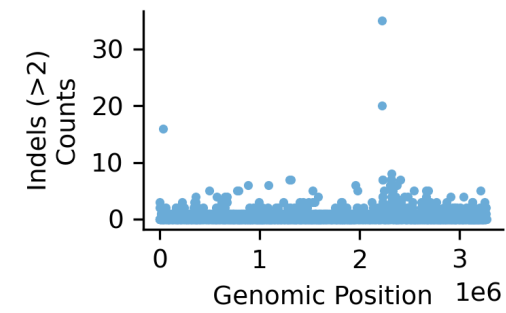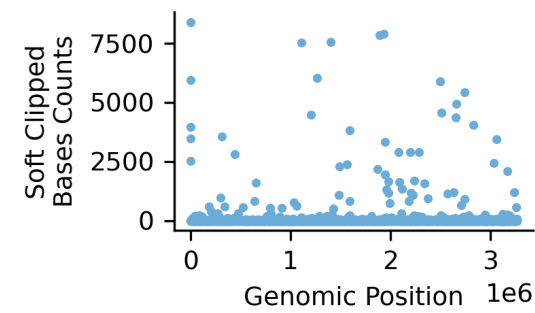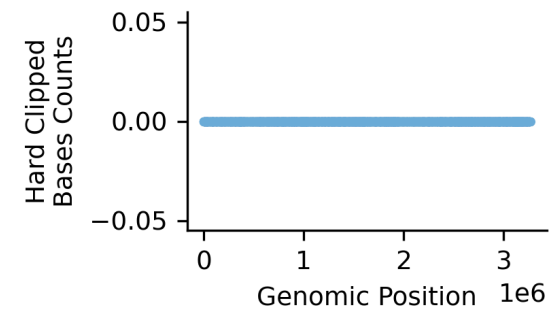

● SCAFFOLD\_14

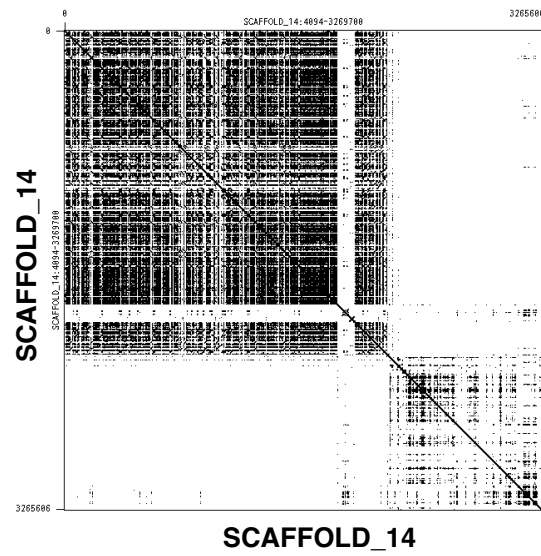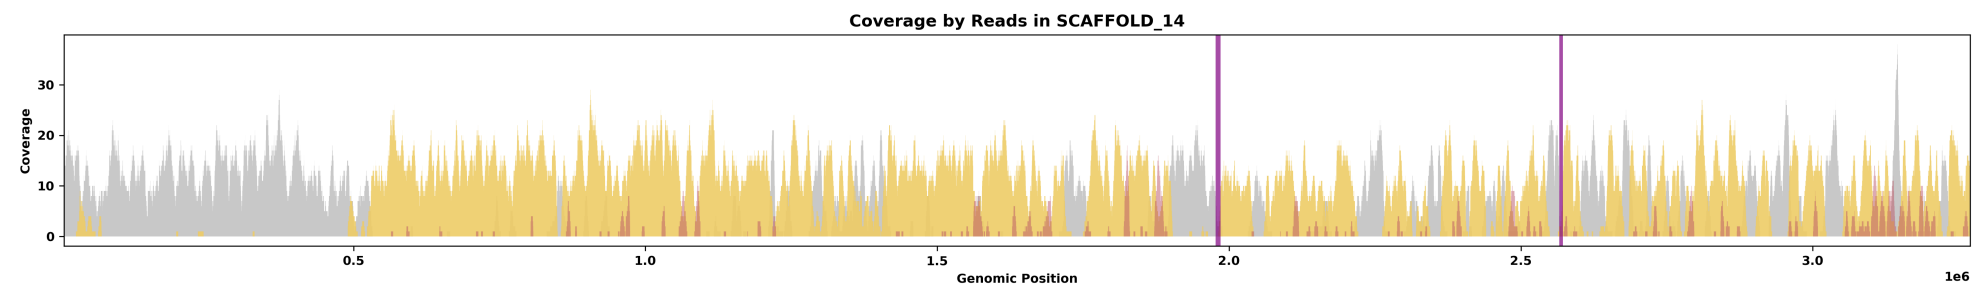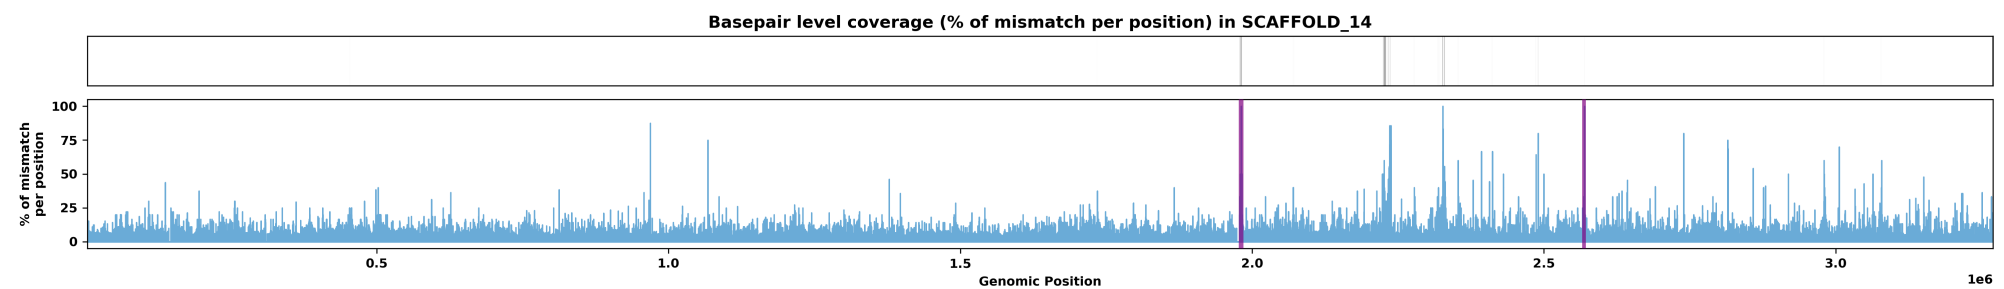

Species ID: mThoBot1  
 Common Name: Botta's pocket gopher  
 Scientific Name: *Thomomys bottae*  
 Assembly Type: Not Haplotype Resolved  
 Data Source: CCGP

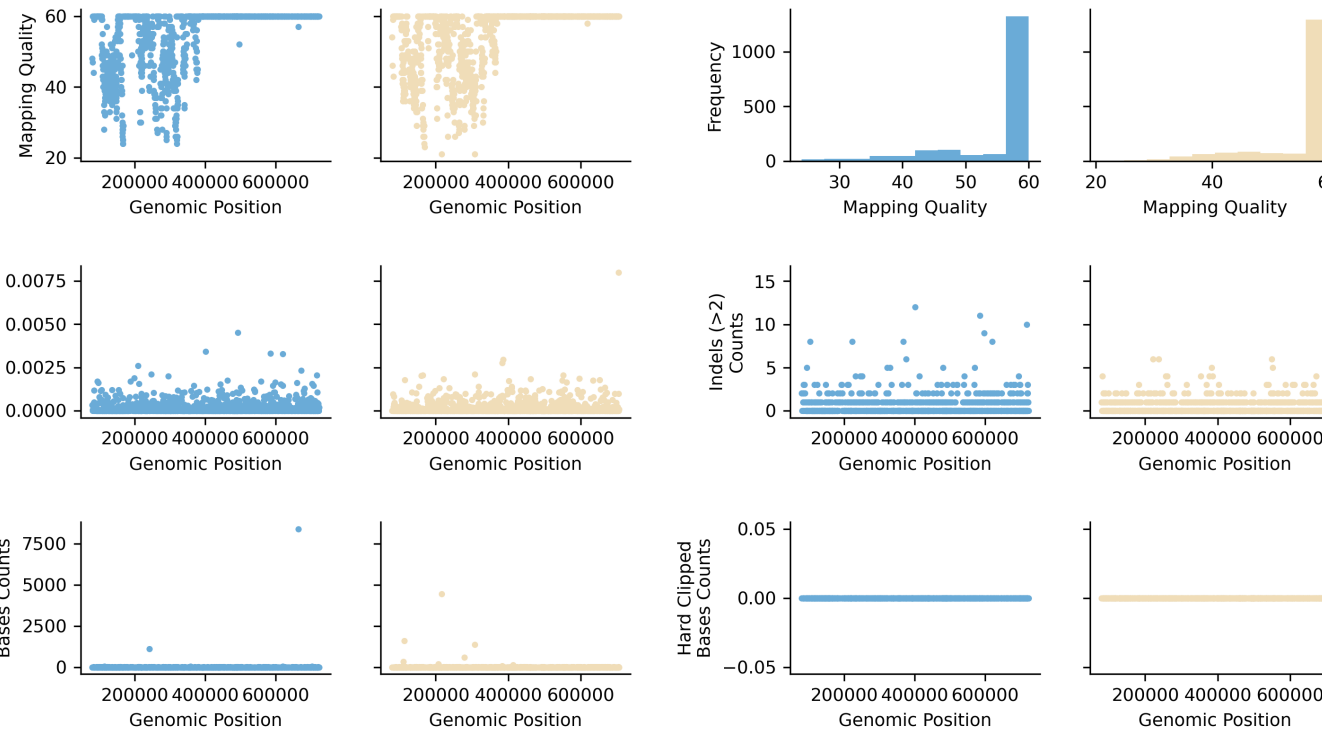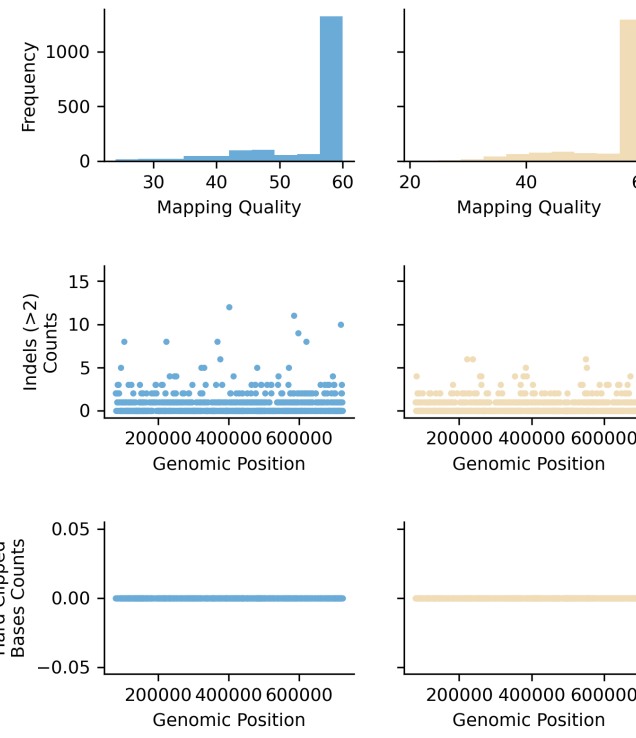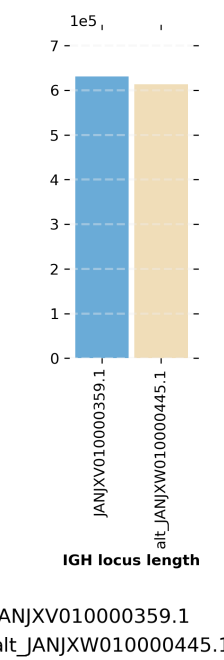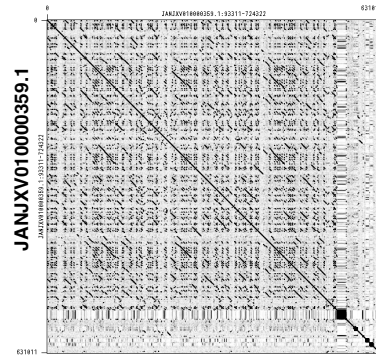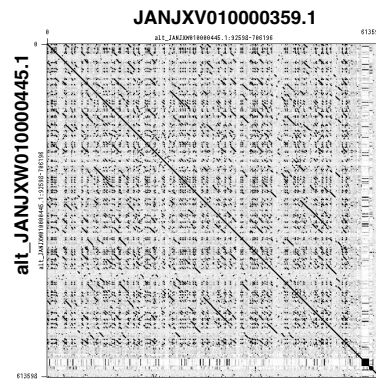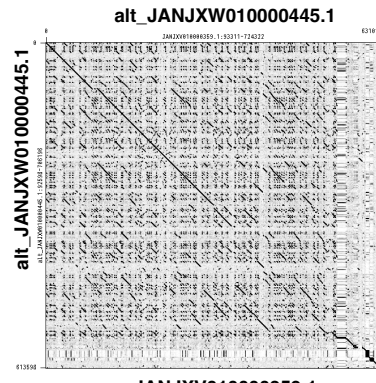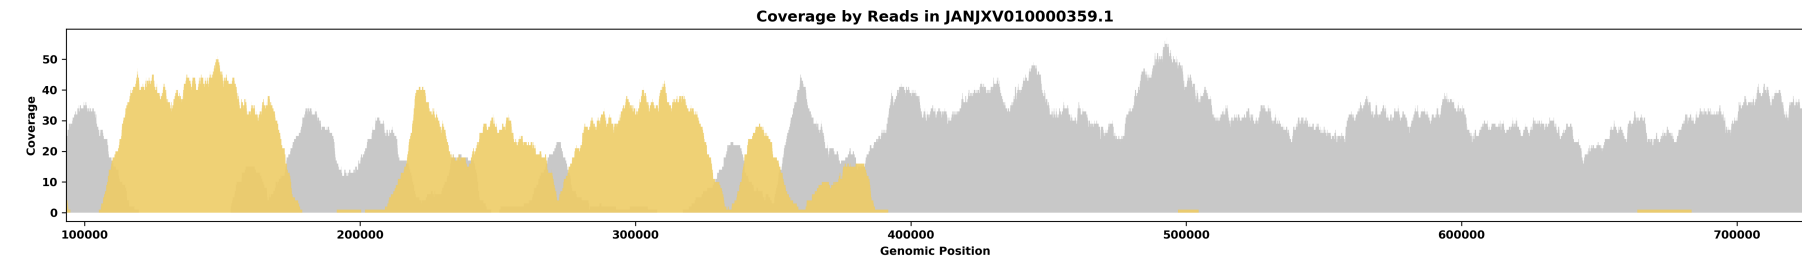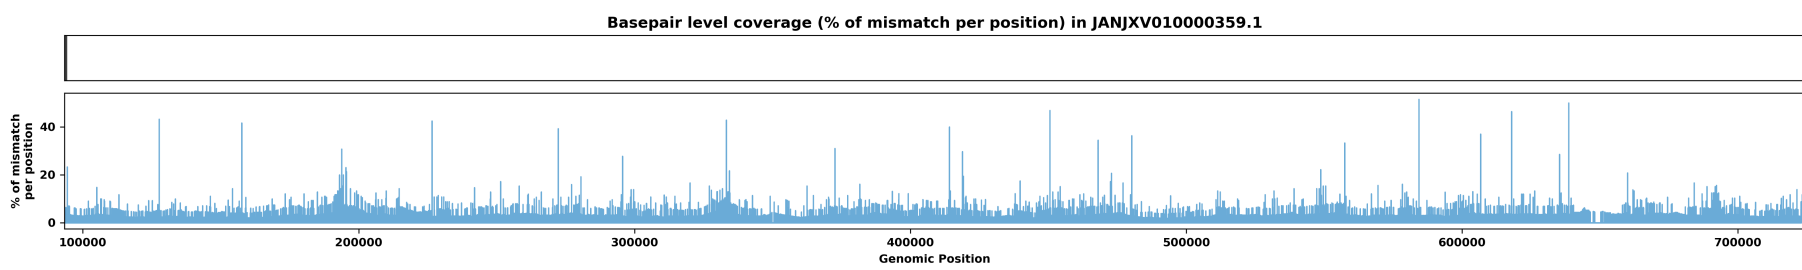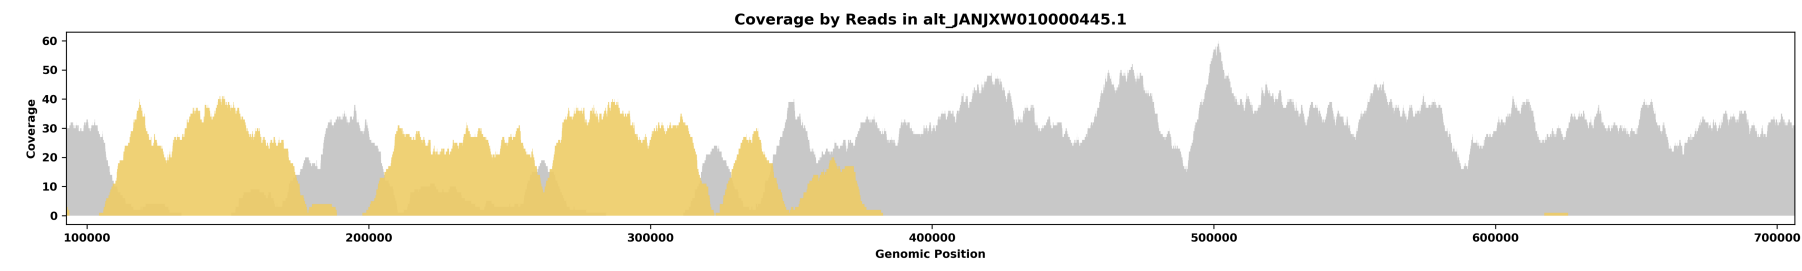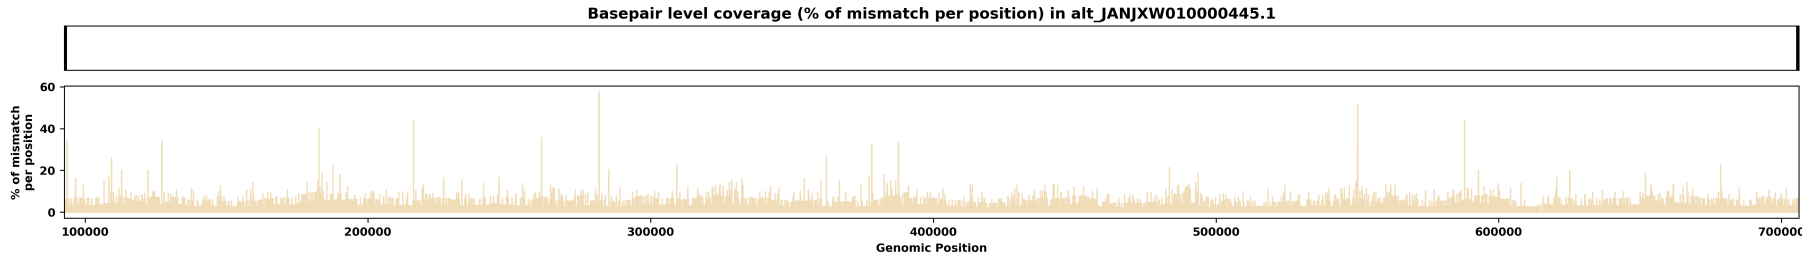

MapQ = 60  
 MapQ = 1-59  
 MapQ = 0



Species ID: mUrsAme1

Common Name: American black bear

Scientific Name: Ursus americanus

Assembly Type: Not [Haplotype](#) Resolved

Data Source: CCGP

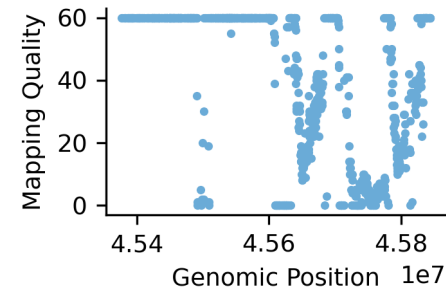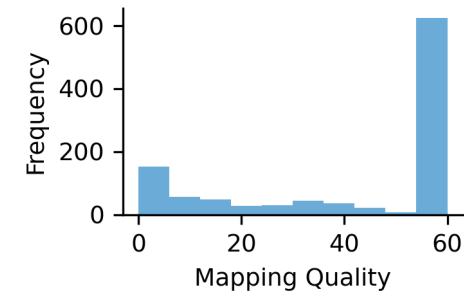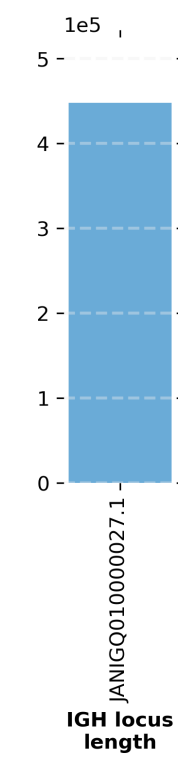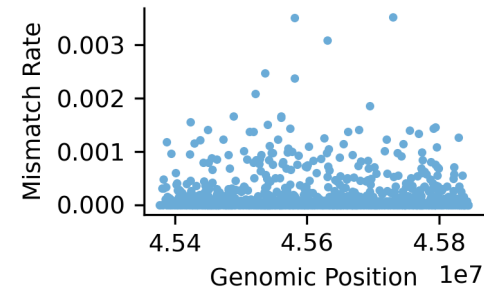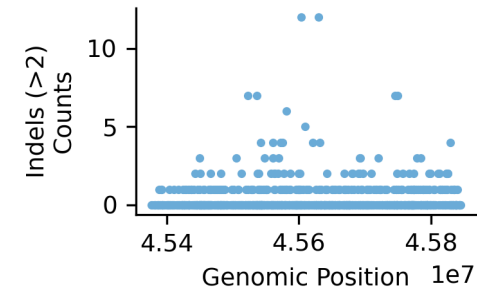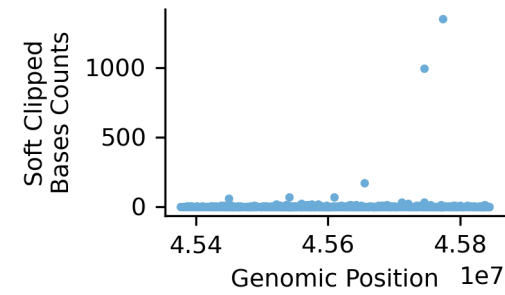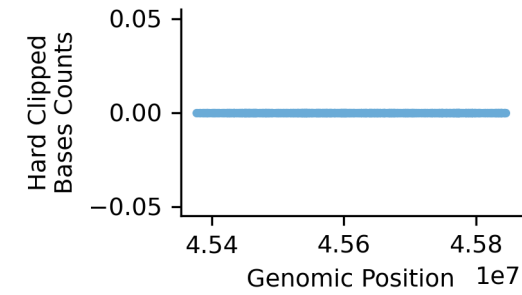

● JANIGQ010000027.1

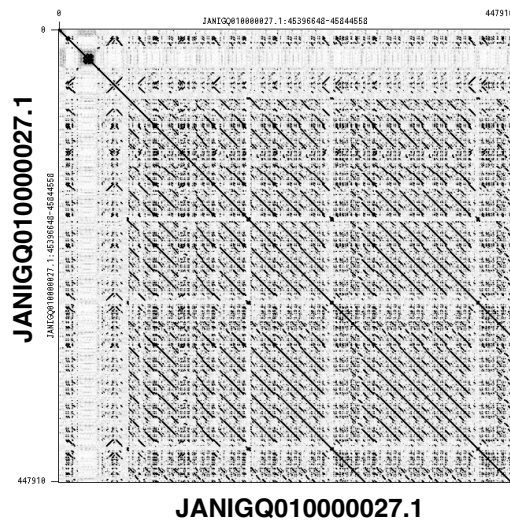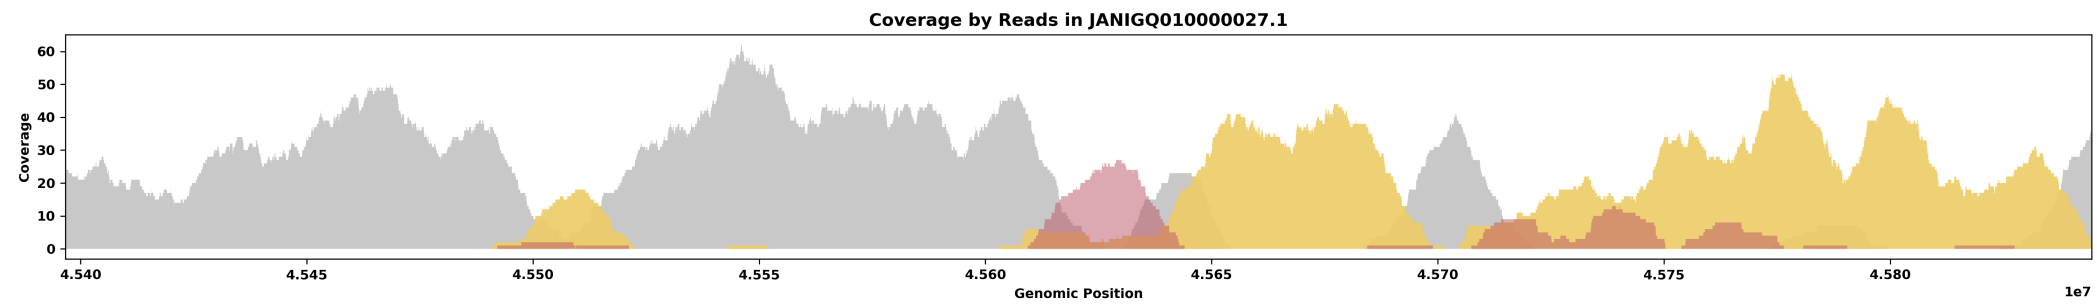

MapQ = 60  
MapQ = 1-59  
MapQ = 0

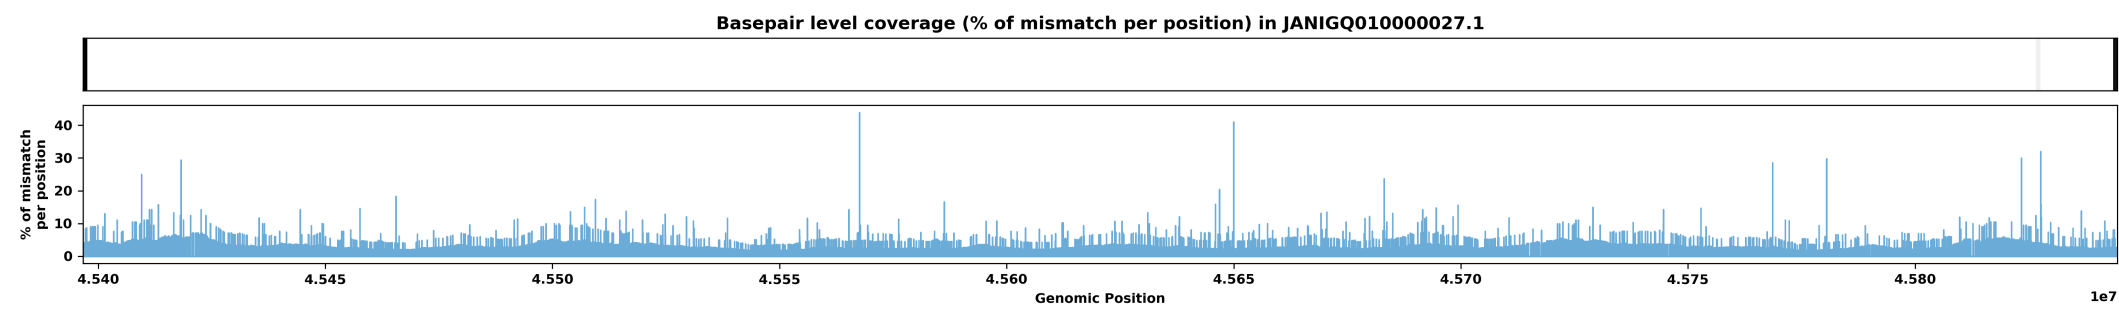

Species ID: mUrsArc2  
 Common Name: brown bear  
 Scientific Name: Ursus arctos  
 Assembly Type: Not Haplotype Resolved  
 Data Source: NCBI

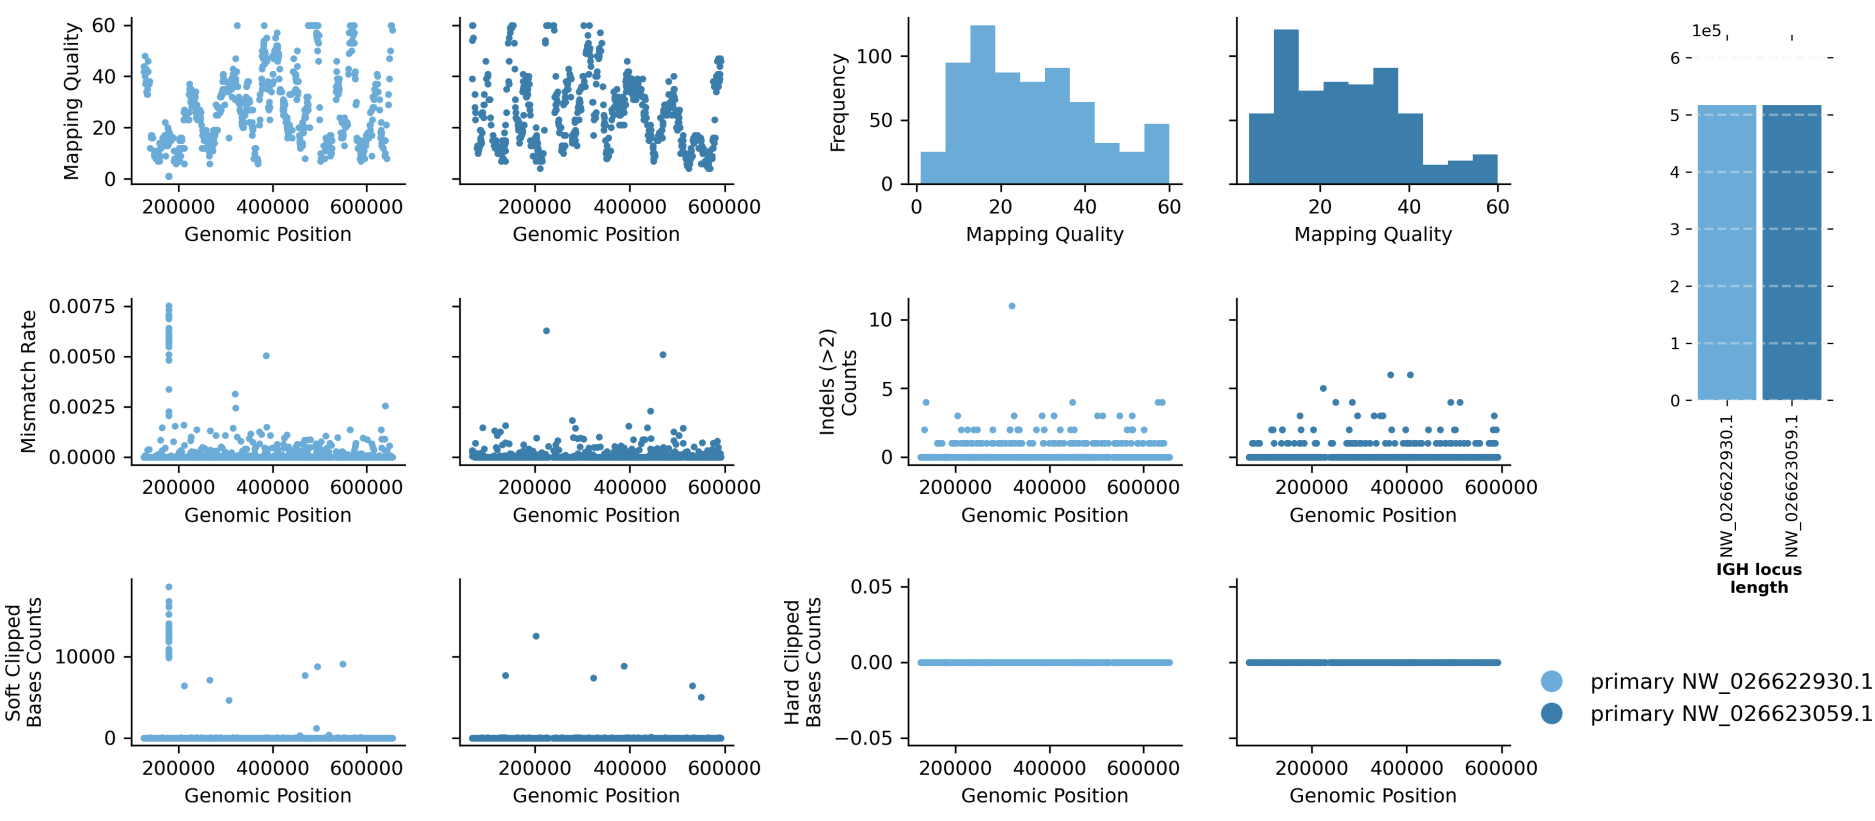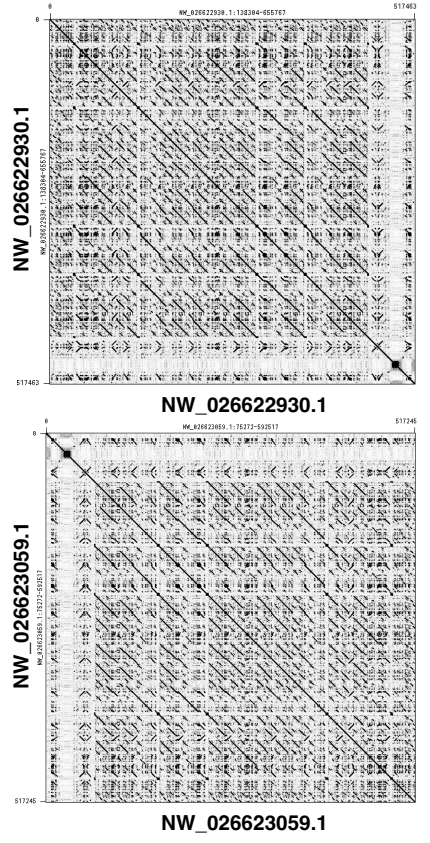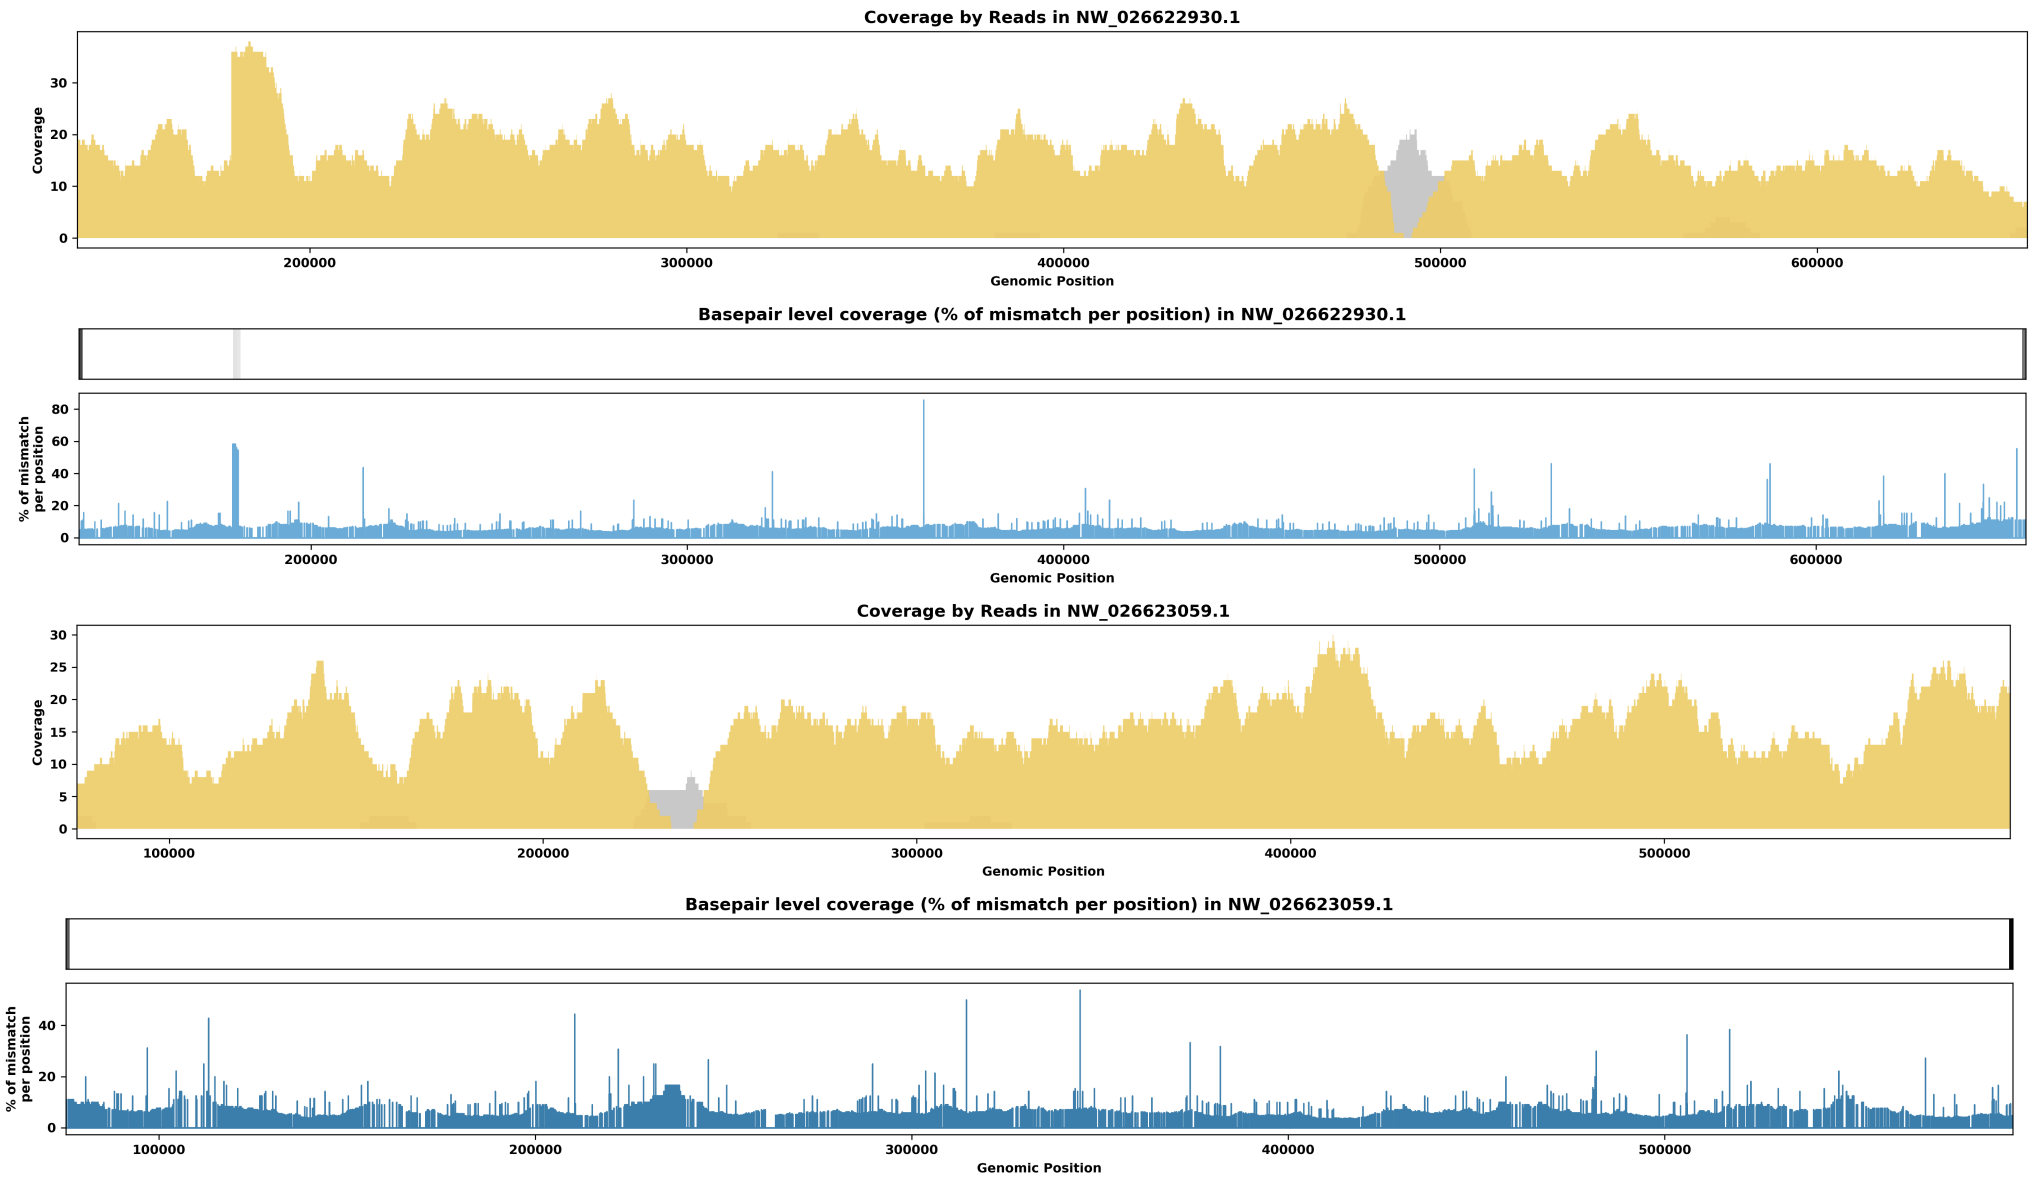

Species ID: mVesMur1  
 Common Name: particolored bat  
 Scientific Name: *Vespertilio murinus*  
 Assembly Type: Not Haplotype Resolved  
 Data Source: VGP

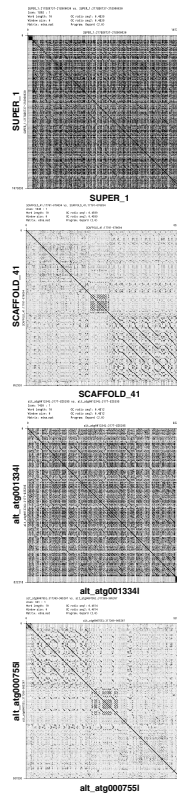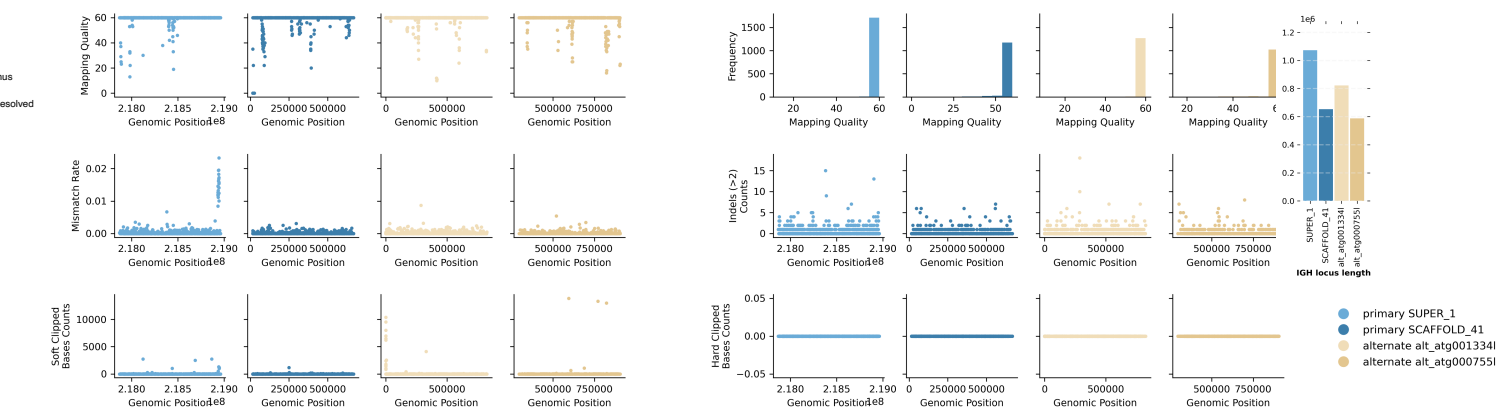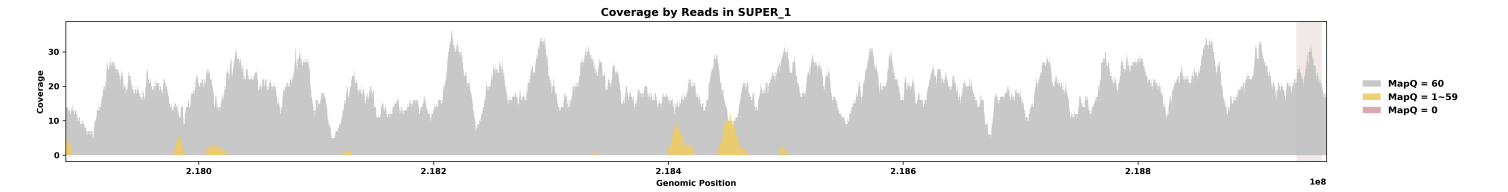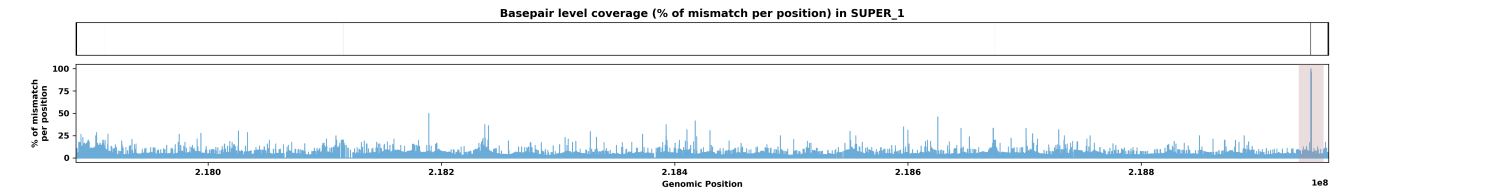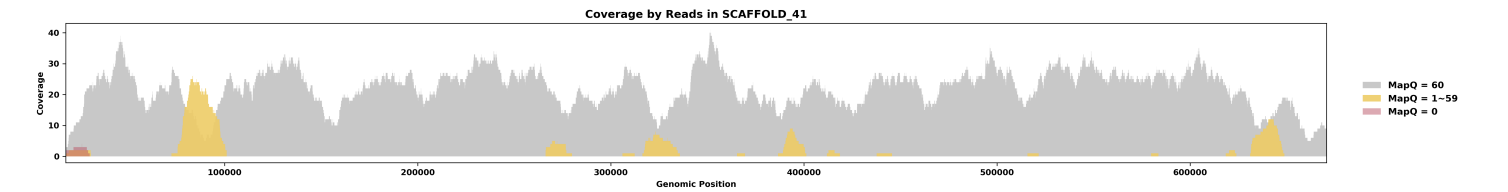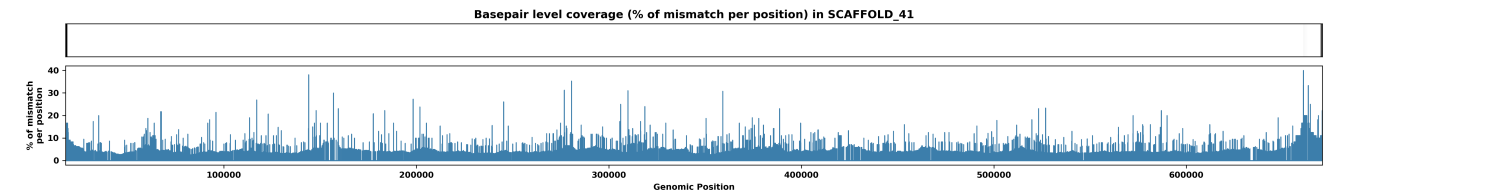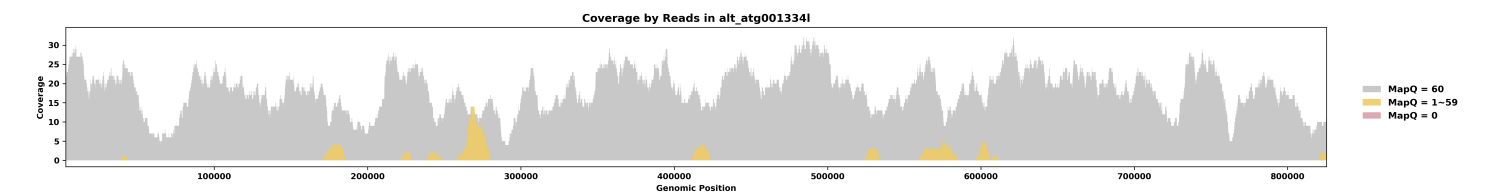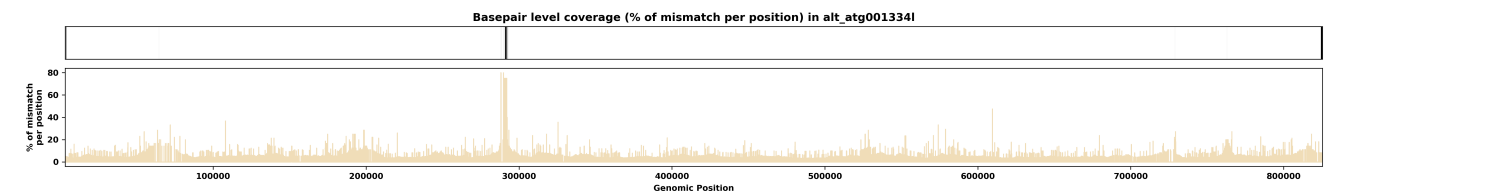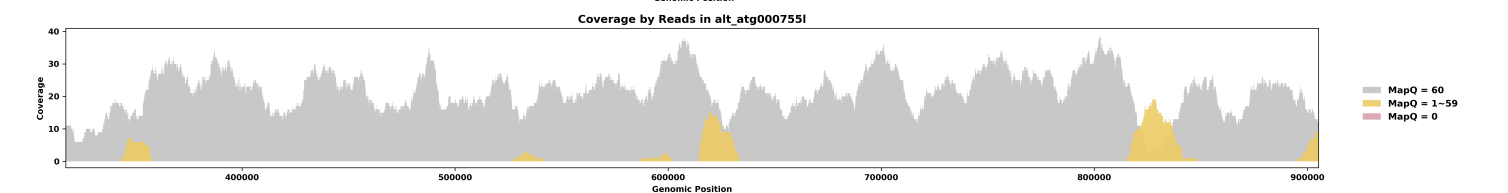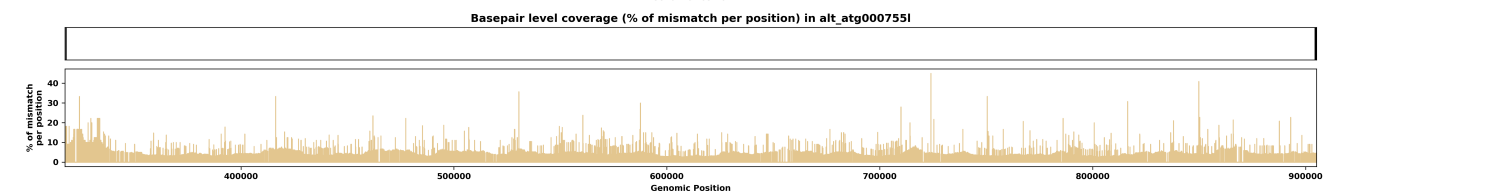

Species ID: rAllMis2  
 Common Name: American alligator  
 Scientific Name: Alligator mississippiensis  
 Assembly Type: Haplotype Resolved  
 Data Source: VGP

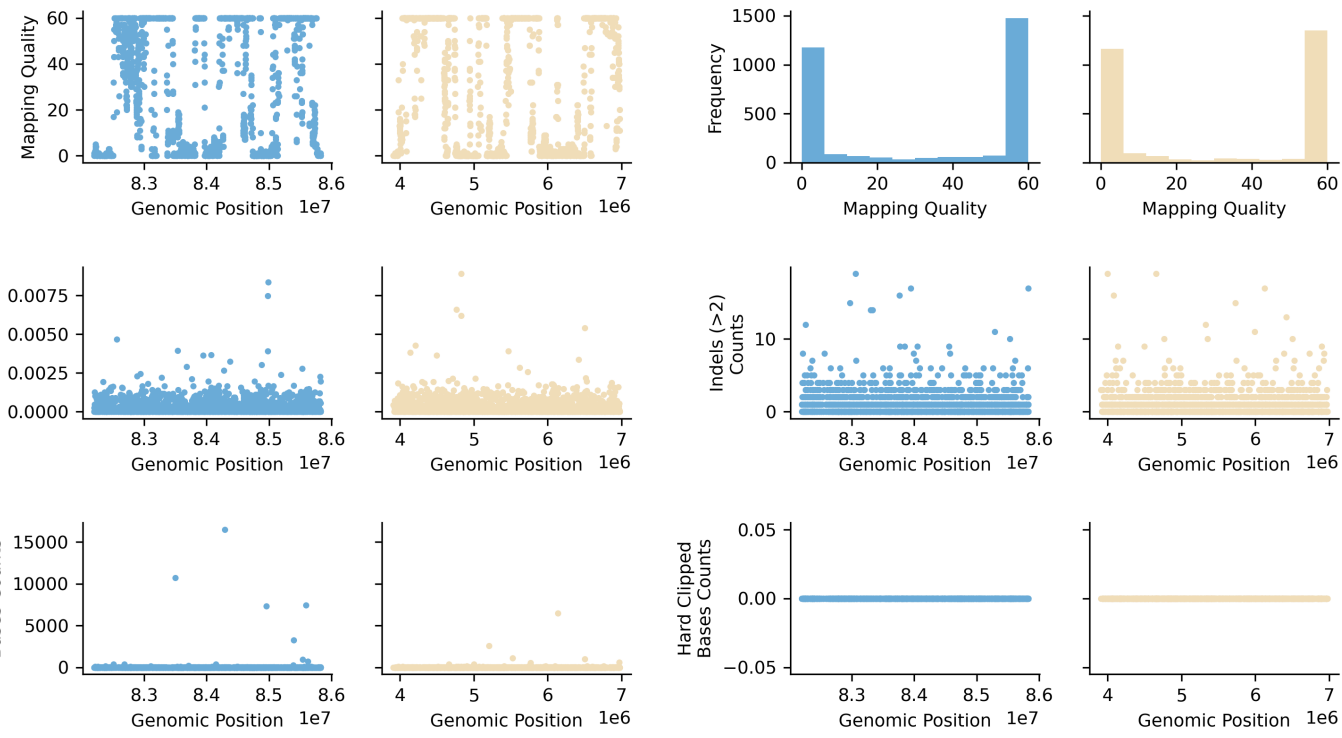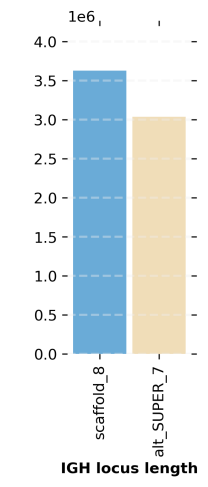

● scaffold\_8  
 ● alt\_SUPER\_7

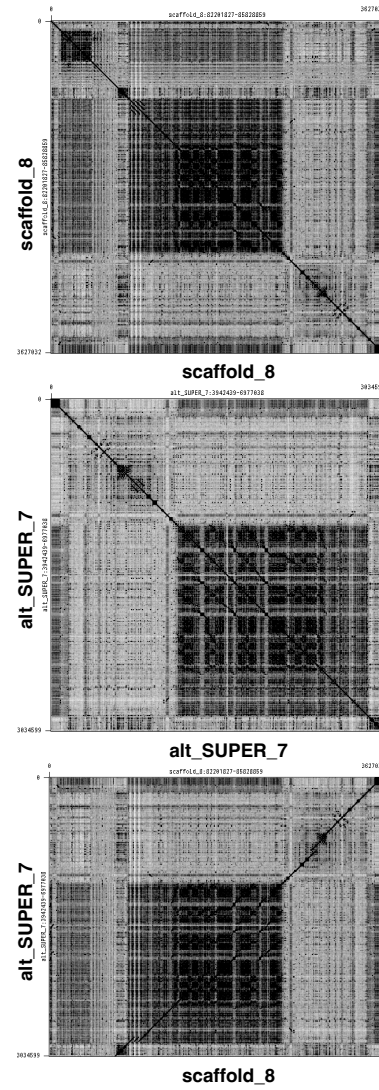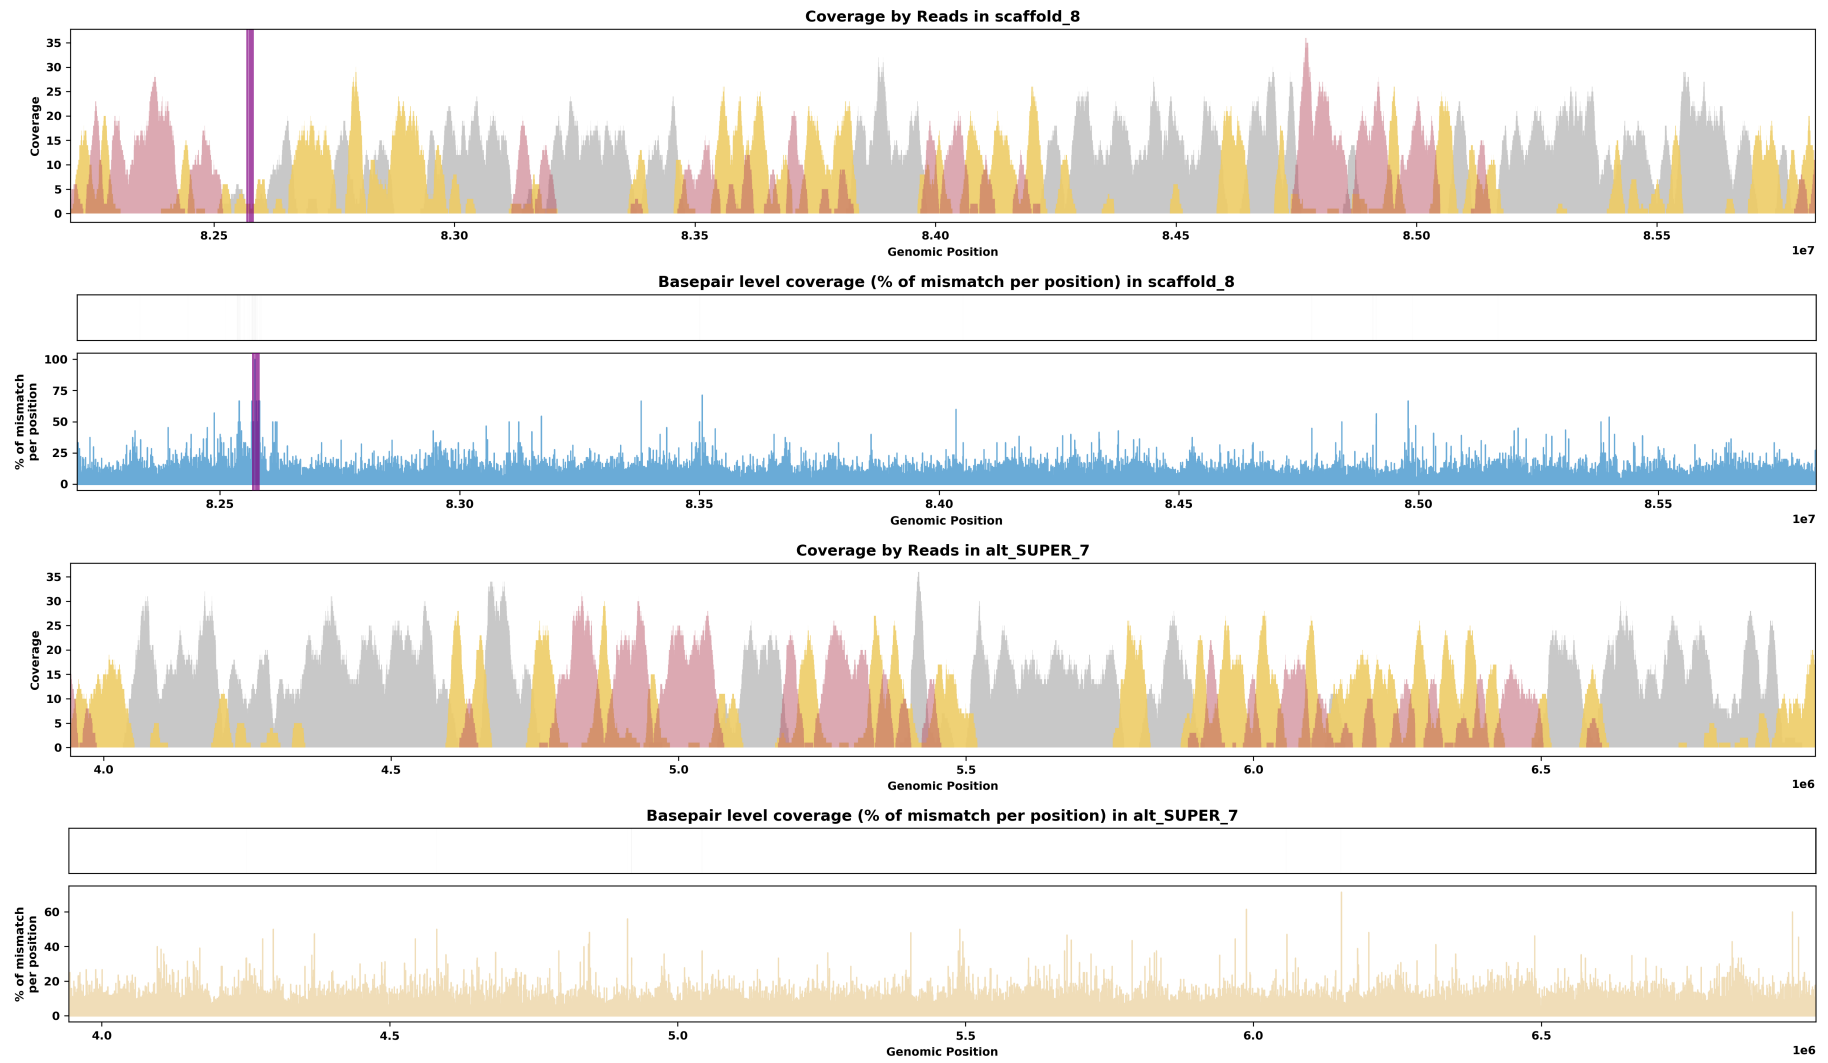

Species ID: rCarCar2  
 Common Name: Loggerhead turtle  
 Scientific Name: Caretta caretta  
 Assembly Type: Haplotype Resolved  
 Data Source: VGP

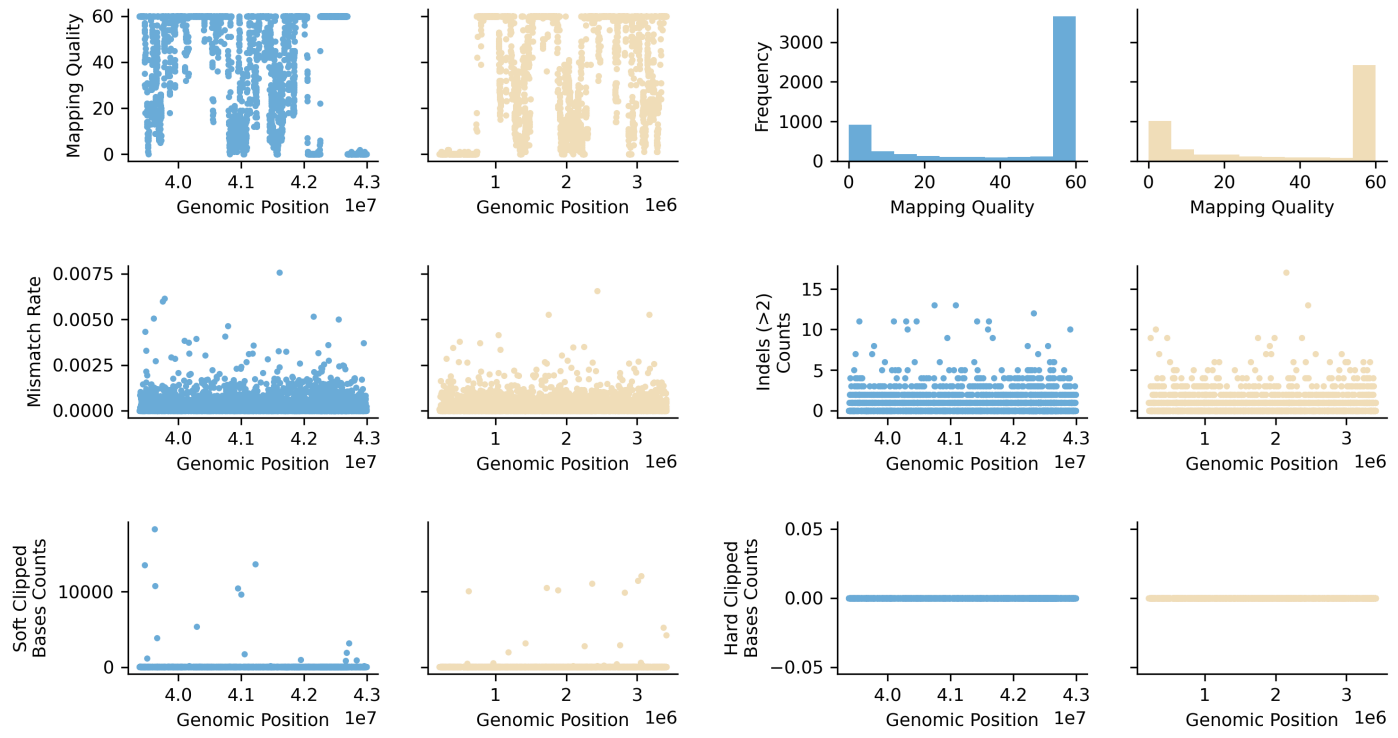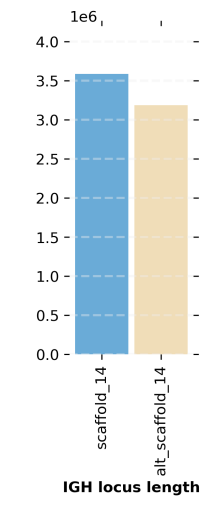

● scaffold\_14  
 ● alt\_scaffold\_14

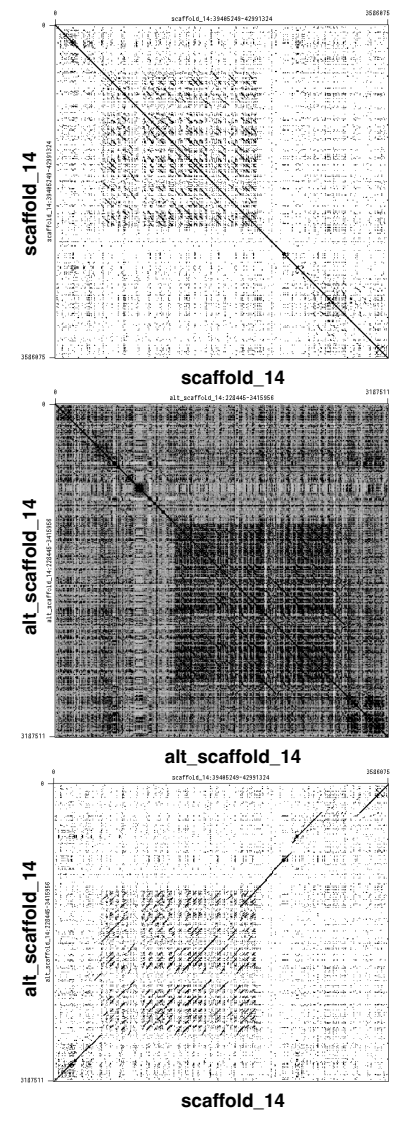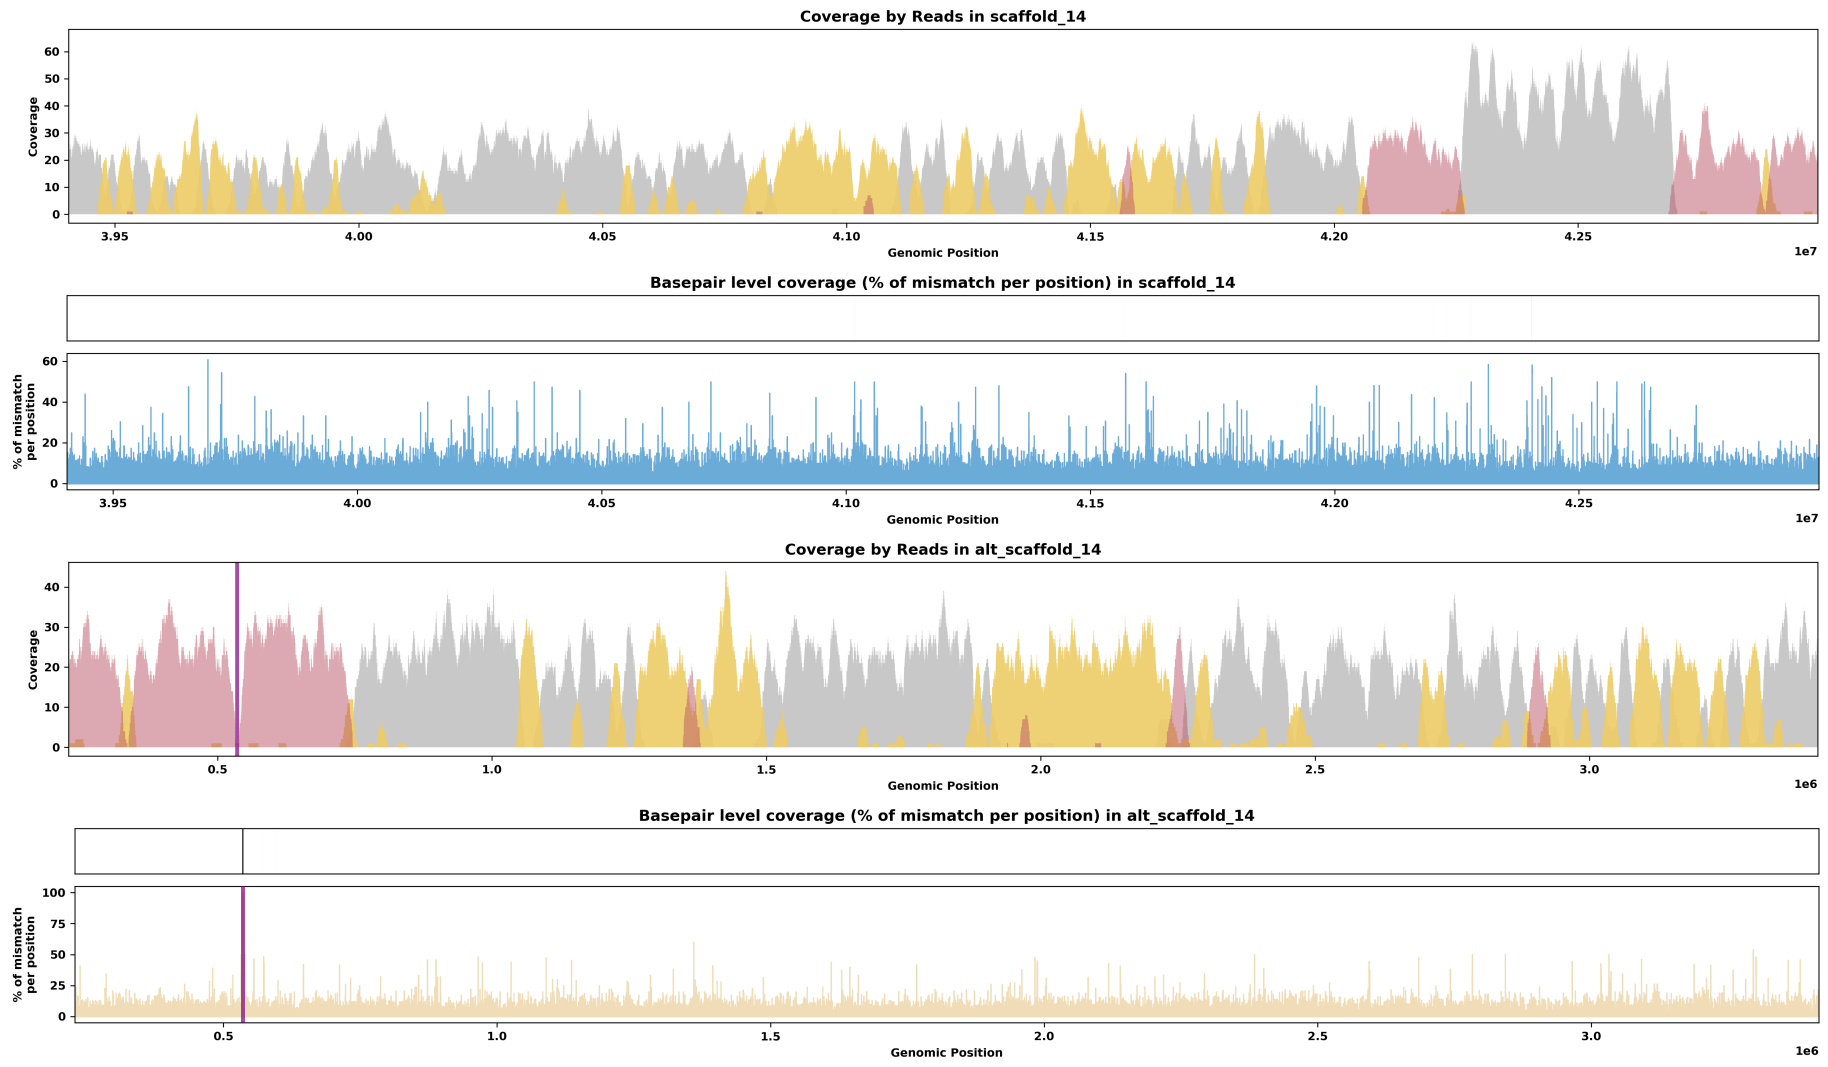

Species ID: rEmyOrb1

Common Name: European pond turtle

Scientific Name: *Emys orbicularis*

Assembly Type: Haplotype Resolved

Data Source: VGP

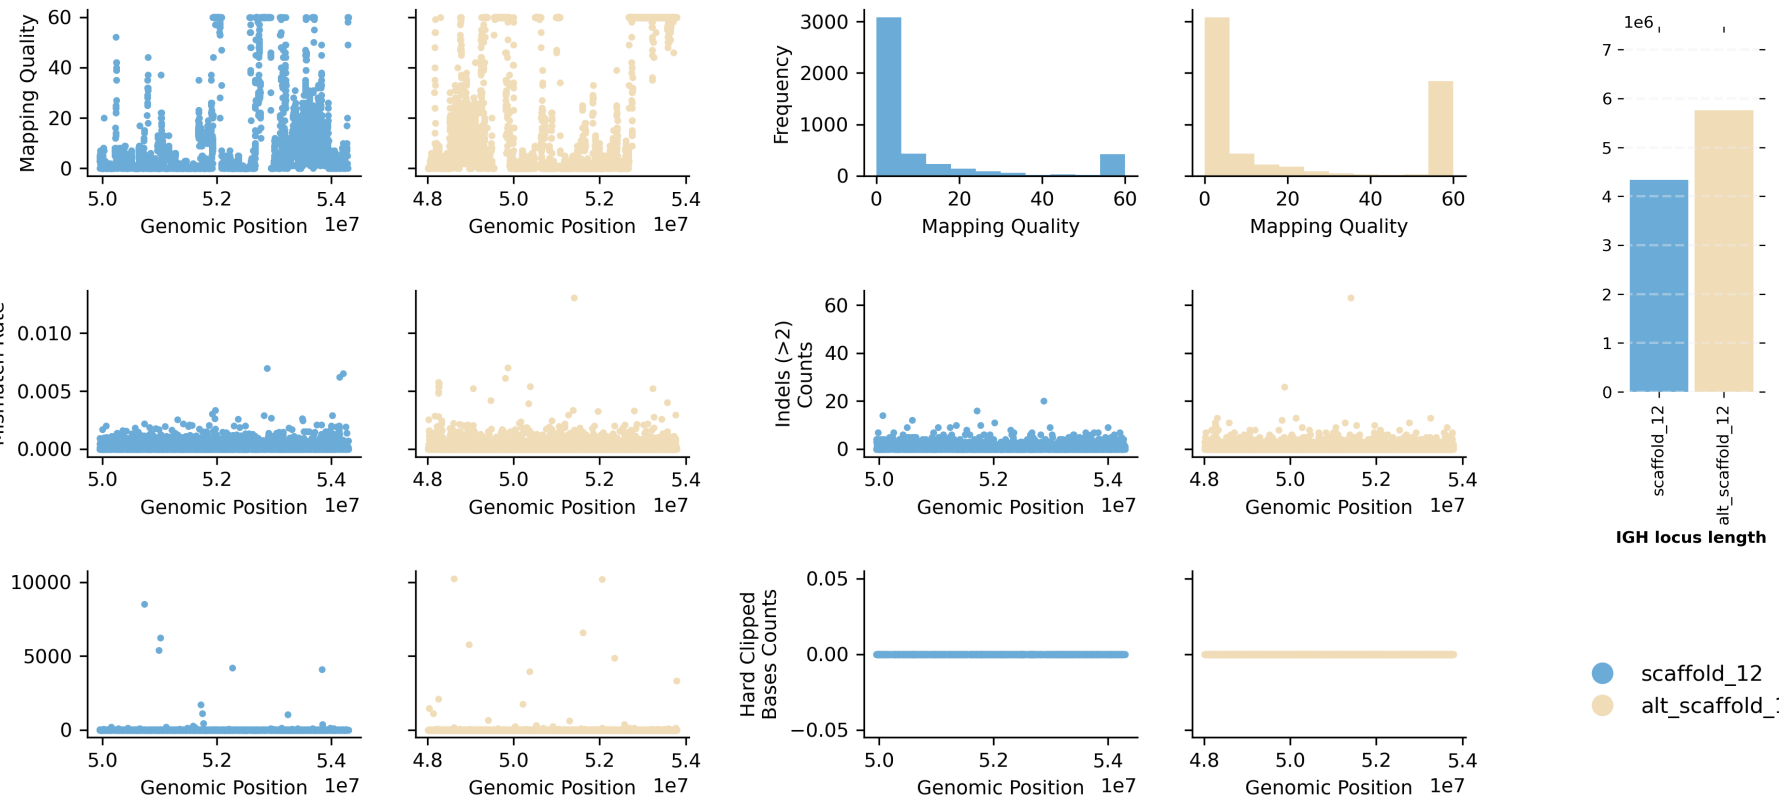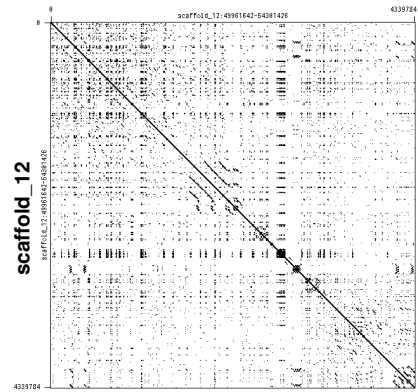

scaffold\_12

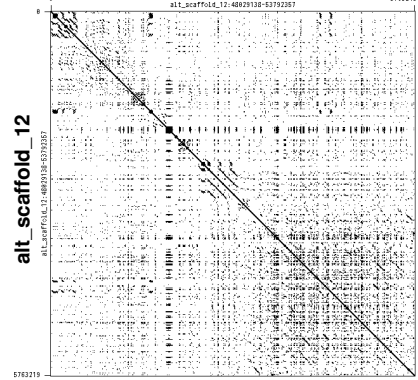

alt\_scaffold\_12

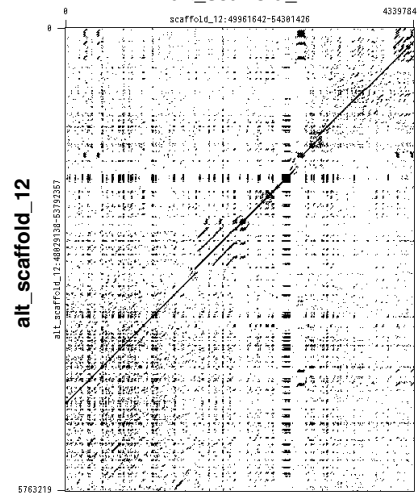

scaffold\_12

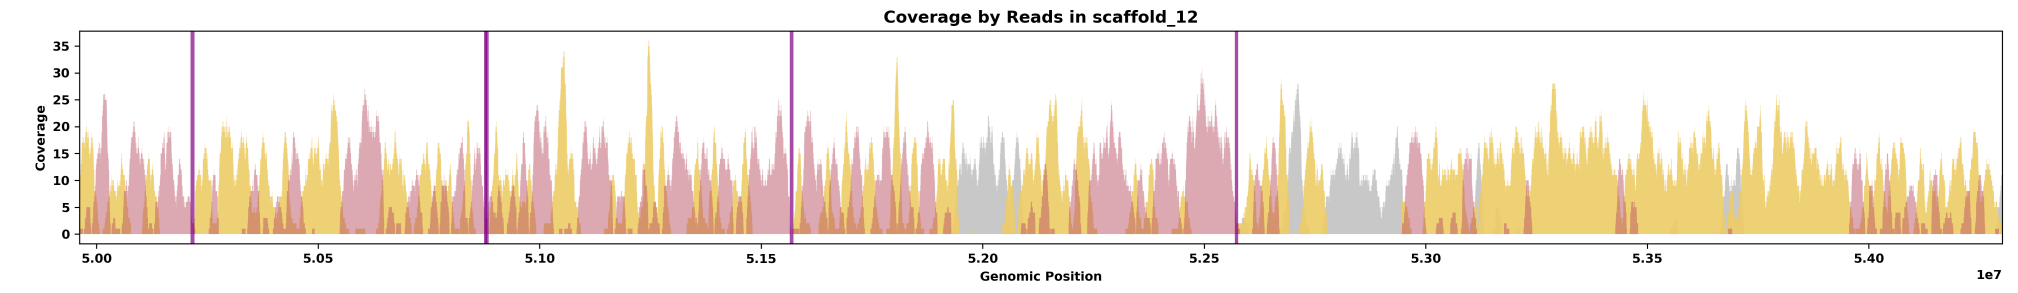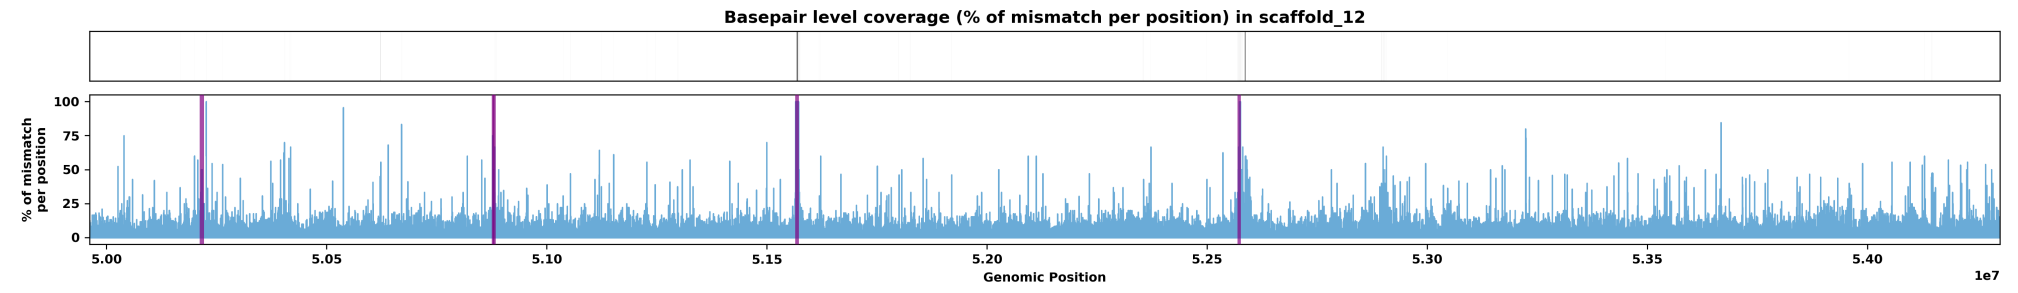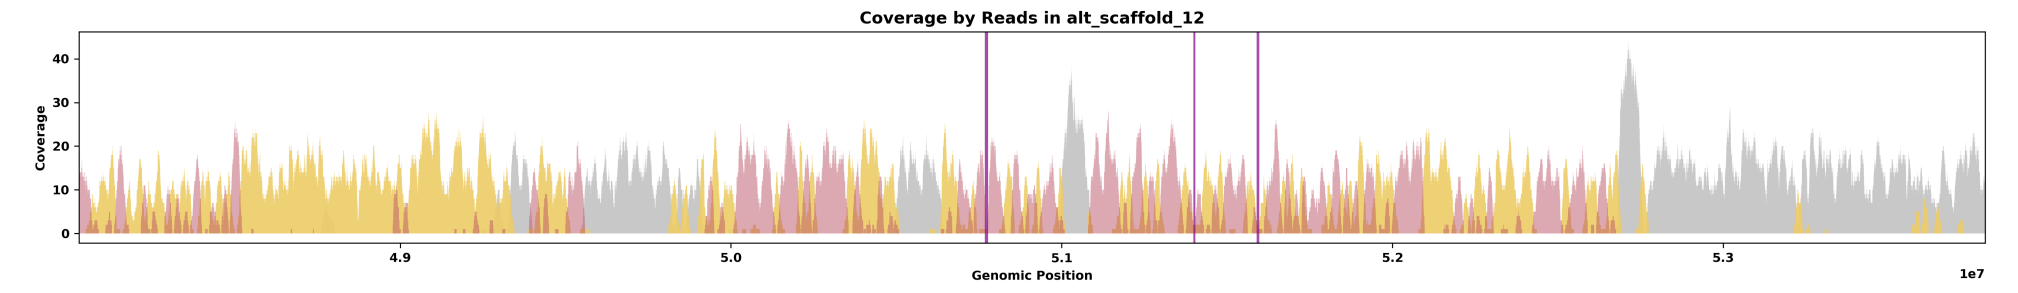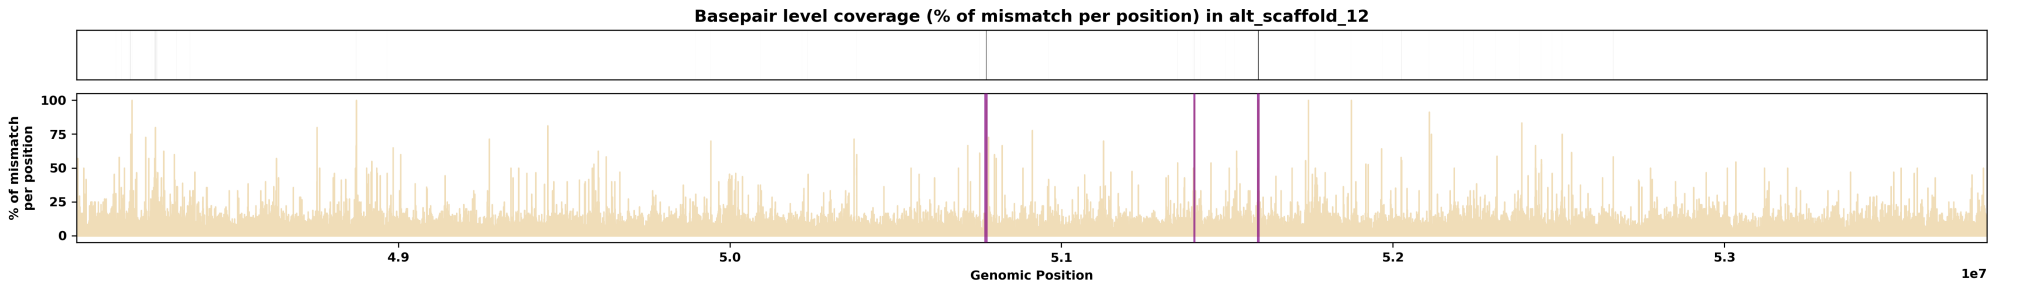

Species ID: rEryReg1  
 Common Name: royal ground snake  
 Scientific Name: Erythrolamprus reginae  
 Assembly Type: Not Haplotype Resolved  
 Data Source: VGP

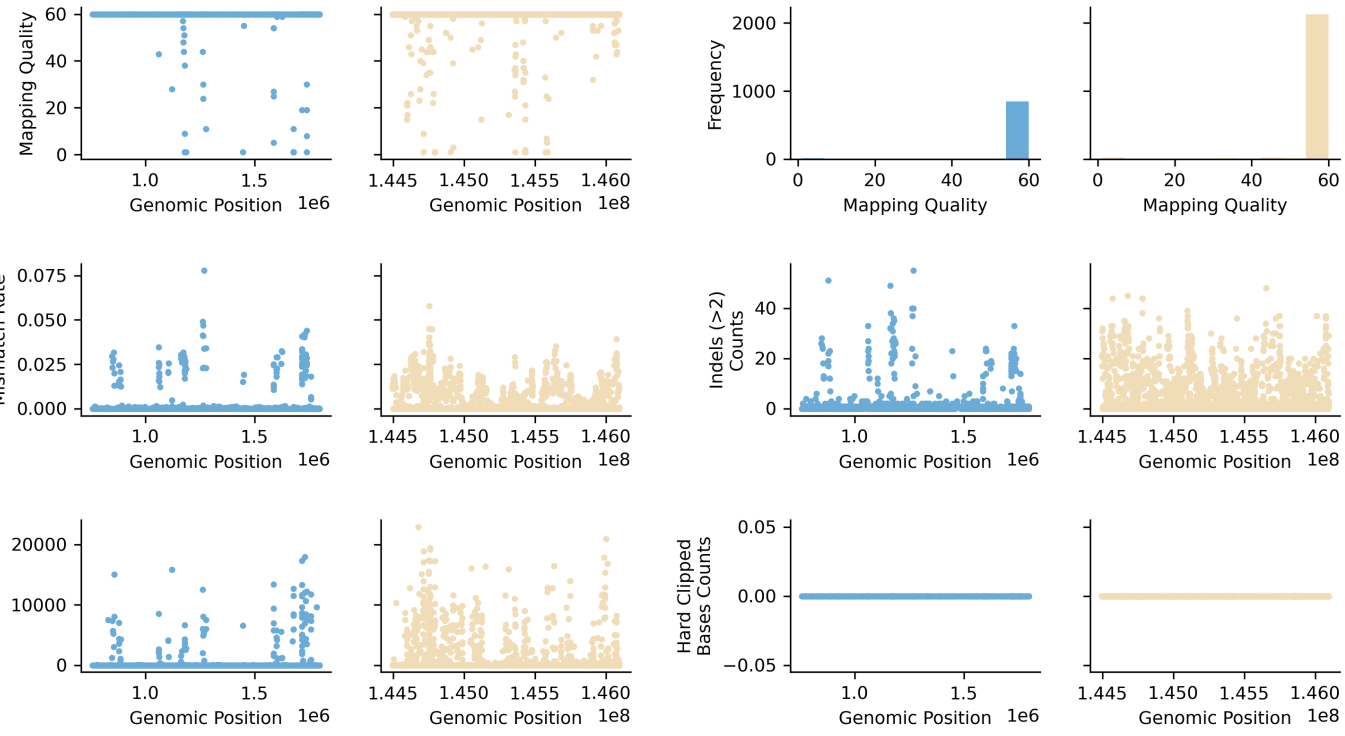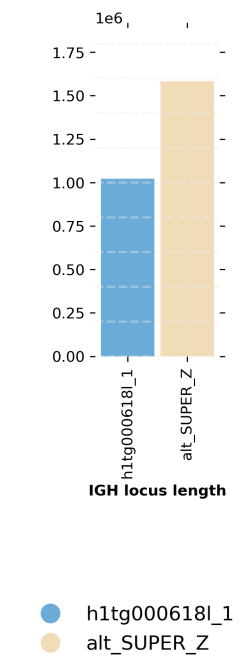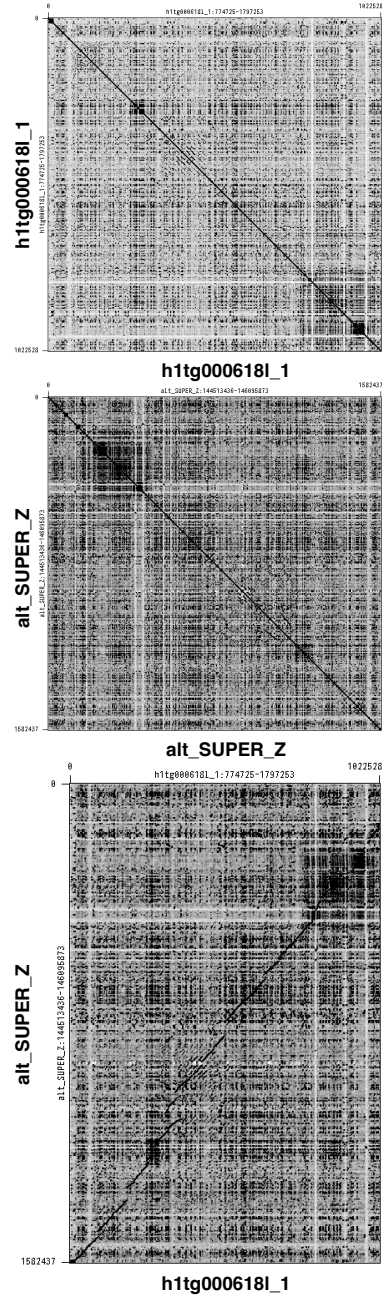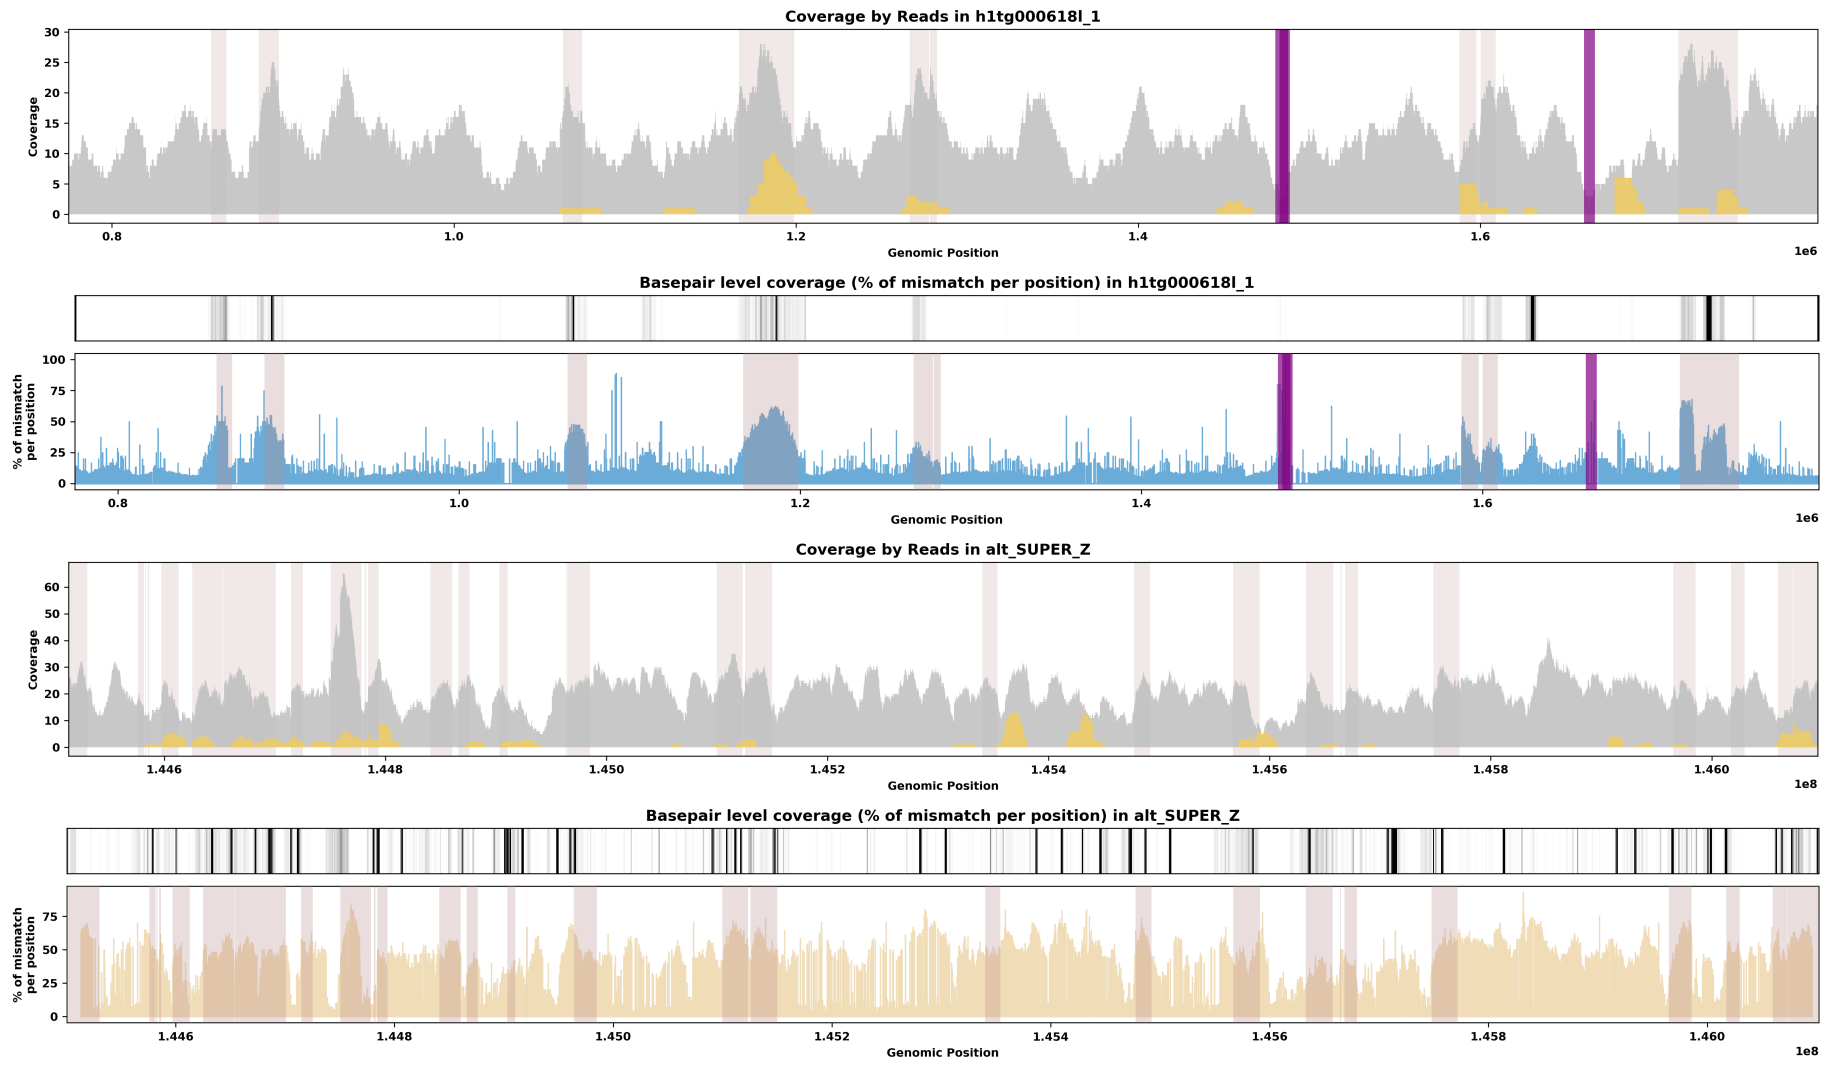

MapQ = 60  
 MapQ = 1-59  
 MapQ = 0

Species ID: rLiaOli1  
 Common Name: olive python  
 Scientific Name: Liasis olivaceus  
 Assembly Type: Haplotype Resolved  
 Data Source: VGP

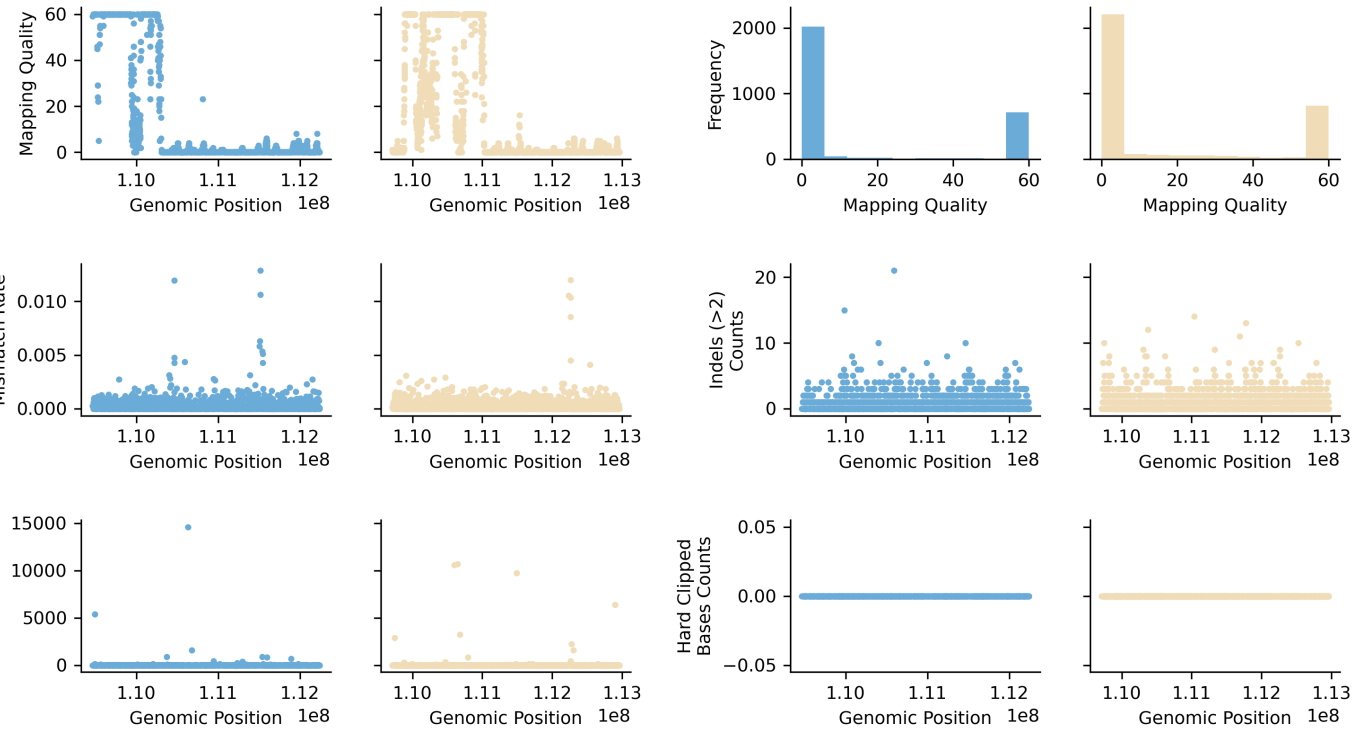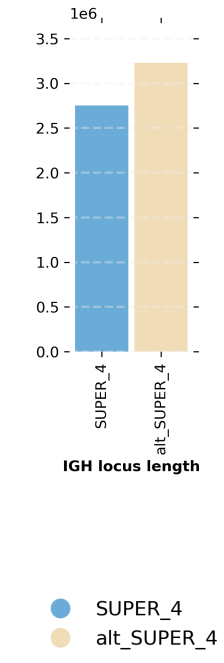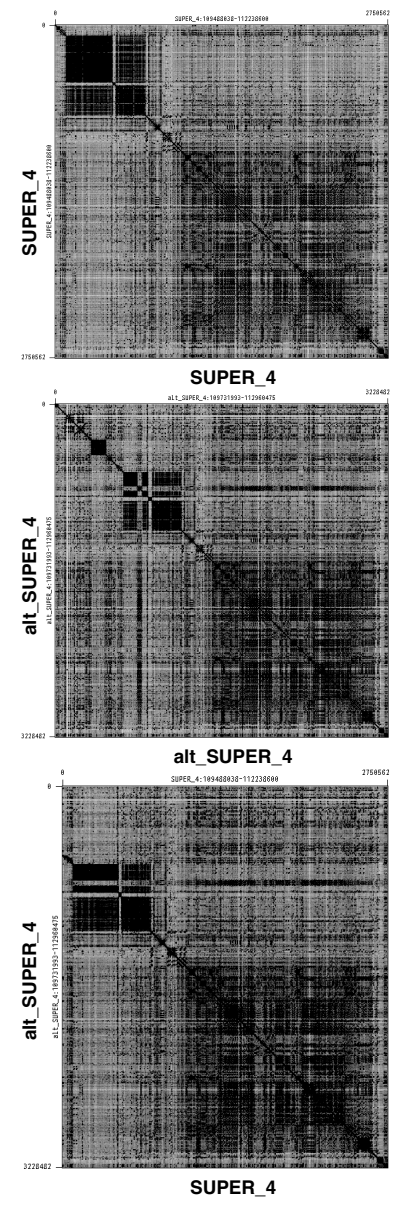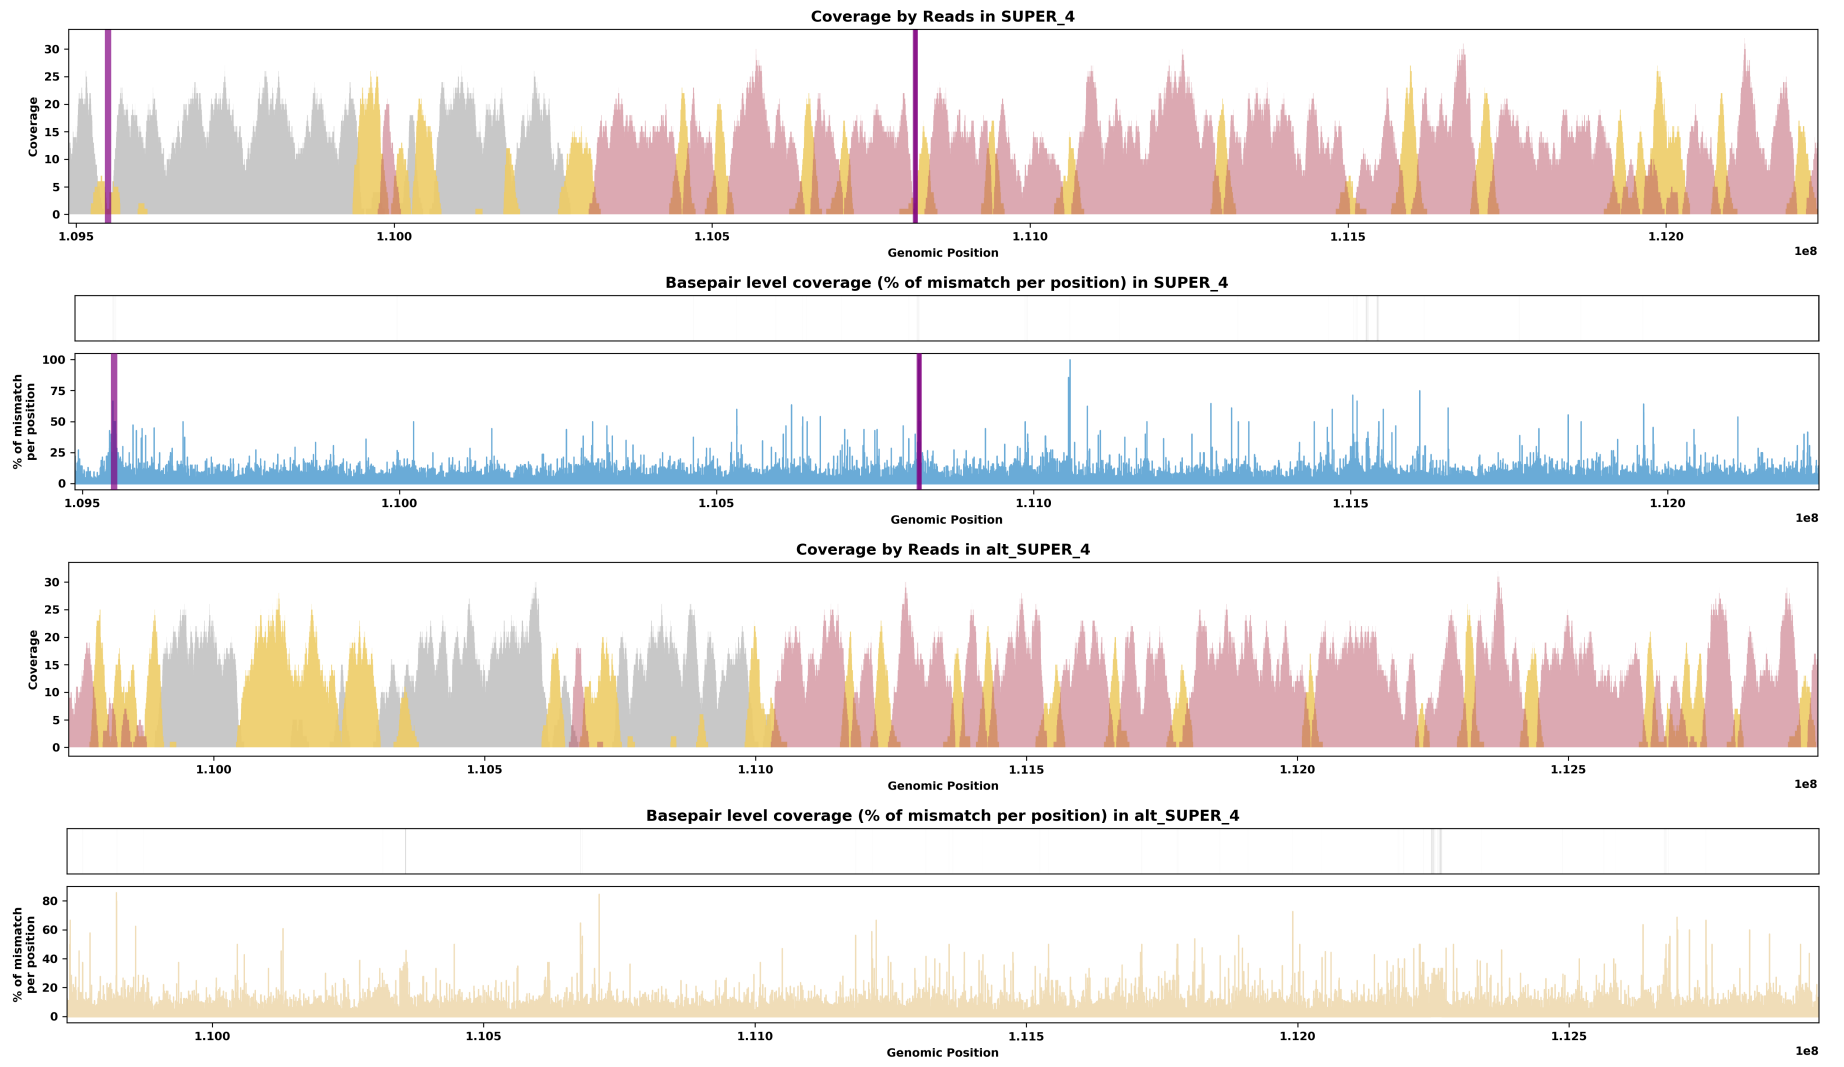



Species ID: rLiaOli2  
 Common Name: olive python  
 Scientific Name: Liasis olivaceus  
 Assembly Type: Haplotype Resolved  
 Data Source: VGP

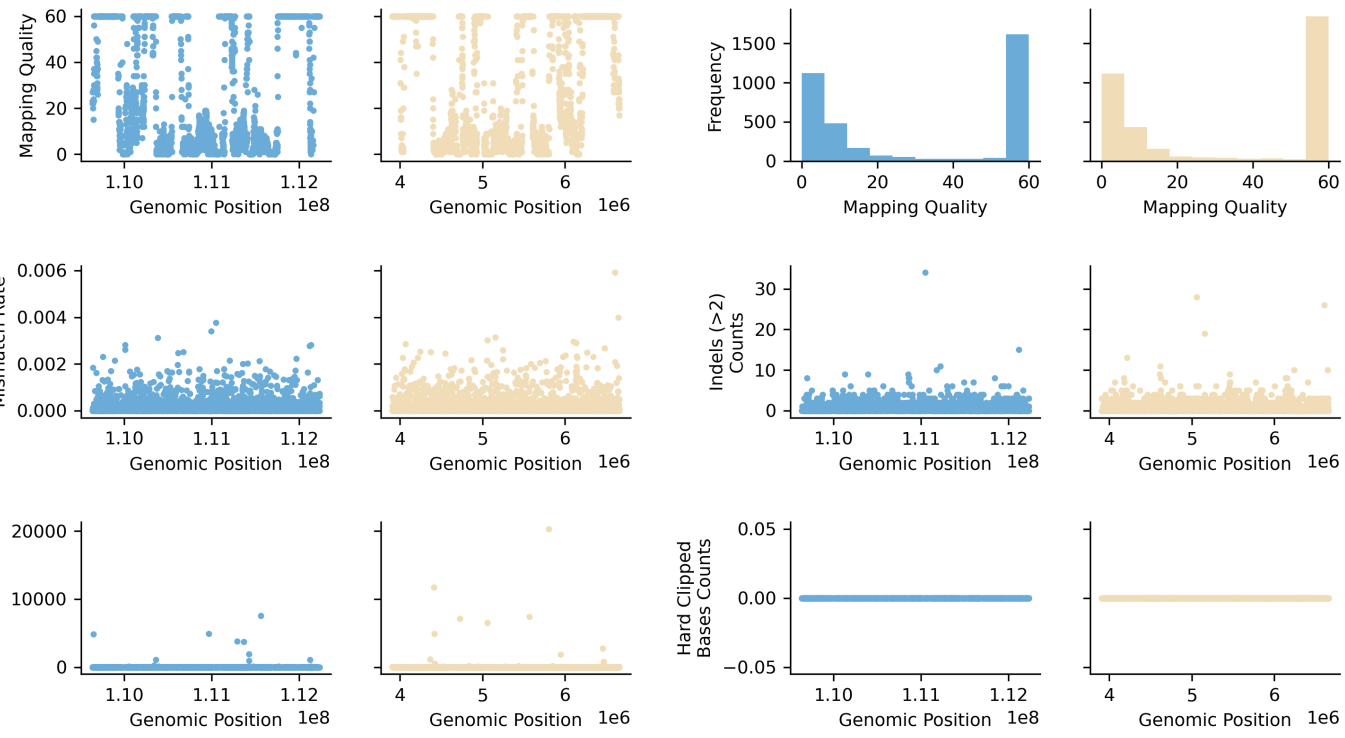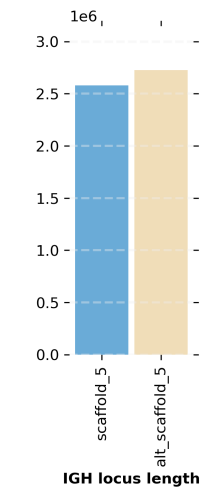

● scaffold\_5  
 ● alt\_scaffold\_5

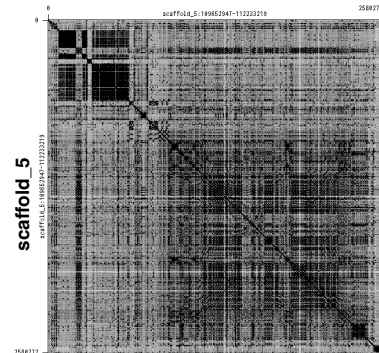

scaffold\_5

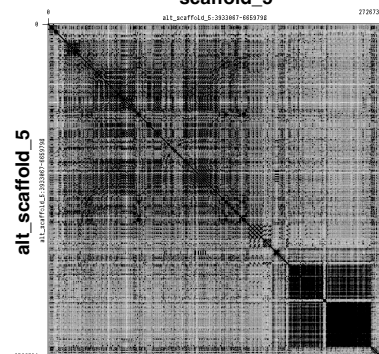

alt\_scaffold\_5

alt\_scaffold\_5

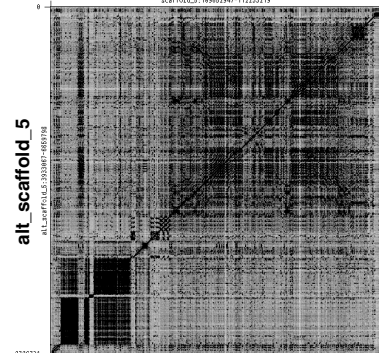

alt\_scaffold\_5

scaffold\_5

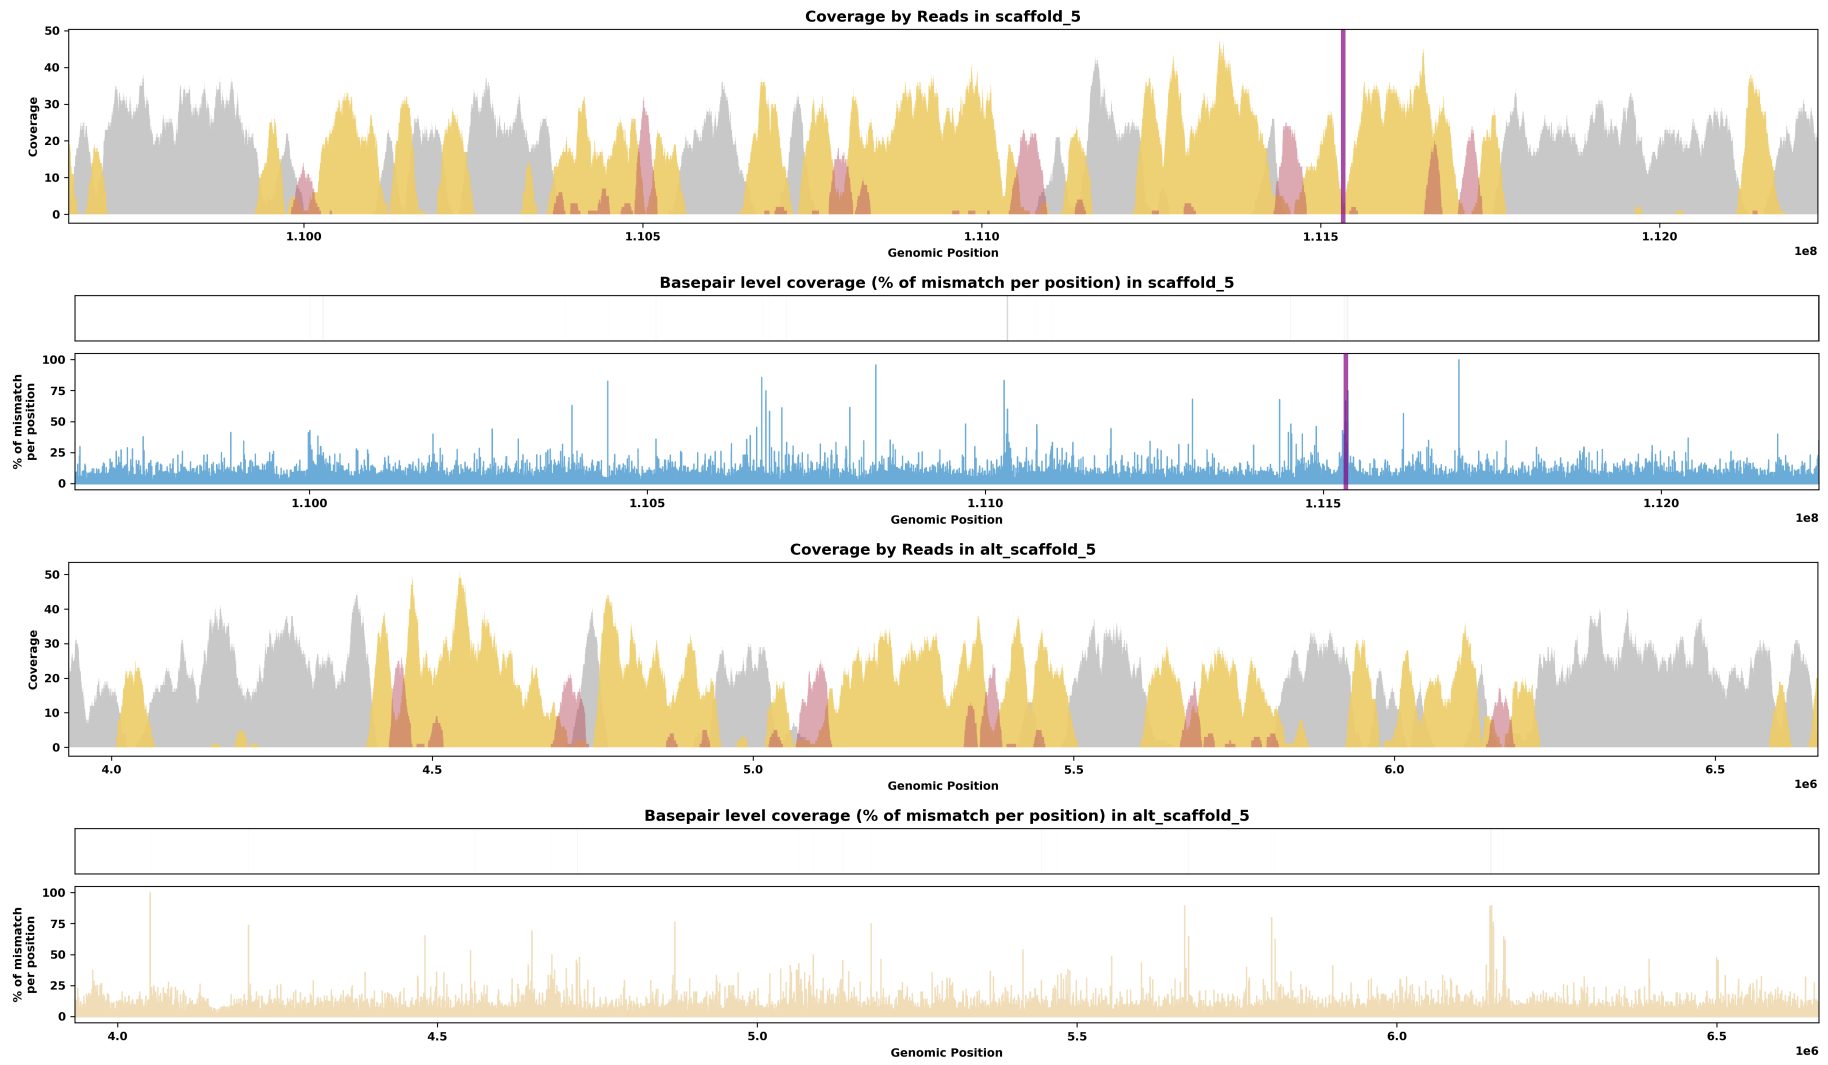

■ MapQ = 60  
 ■ MapQ = 1-59  
 ■ MapQ = 0

■ MapQ = 60  
 ■ MapQ = 1-59  
 ■ MapQ = 0

Species ID: rMalTer1  
 Common Name: diamondback terrapin  
 Scientific Name: Malaclemys terrapin  
 Assembly Type: Haplotype Resolved  
 Data Source: VGP

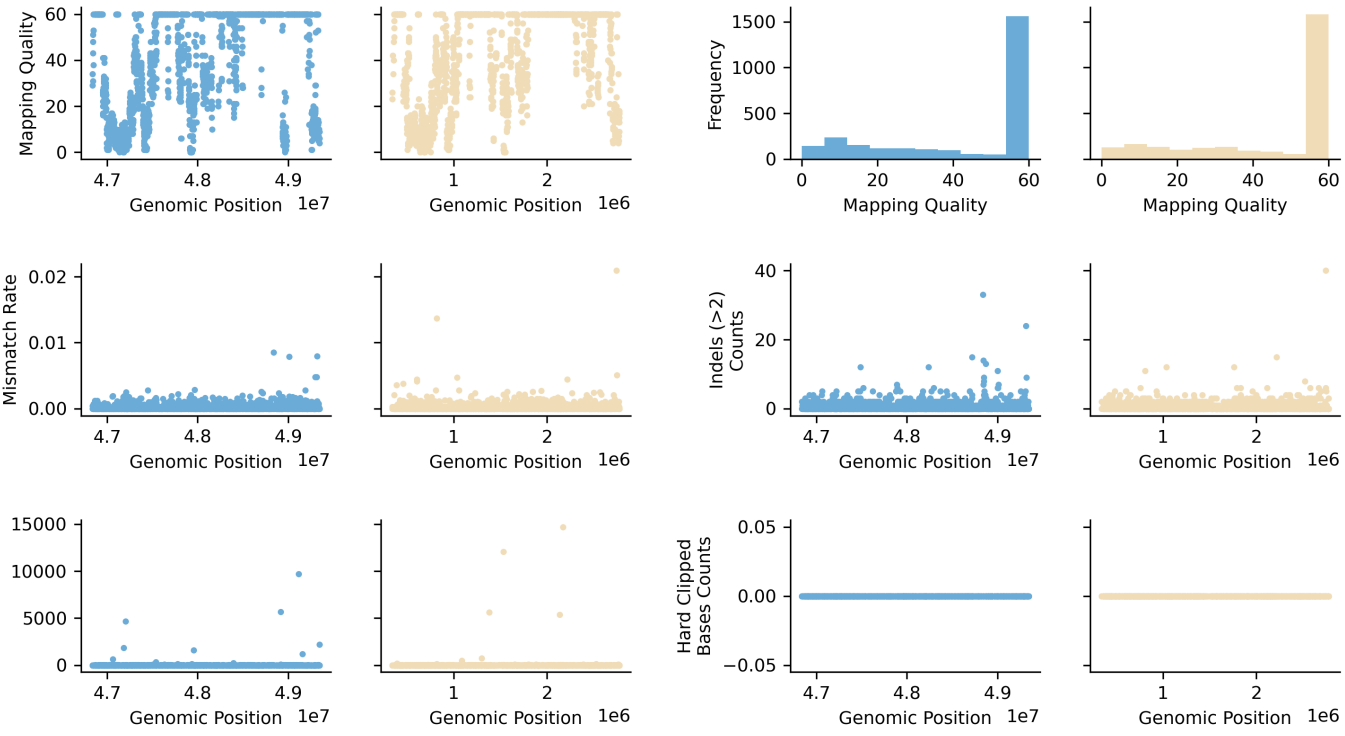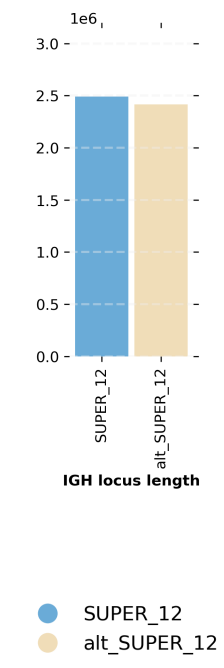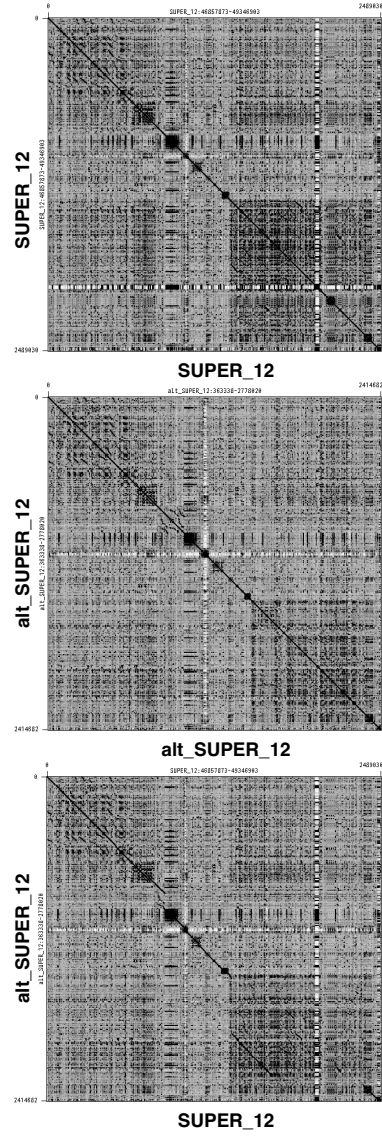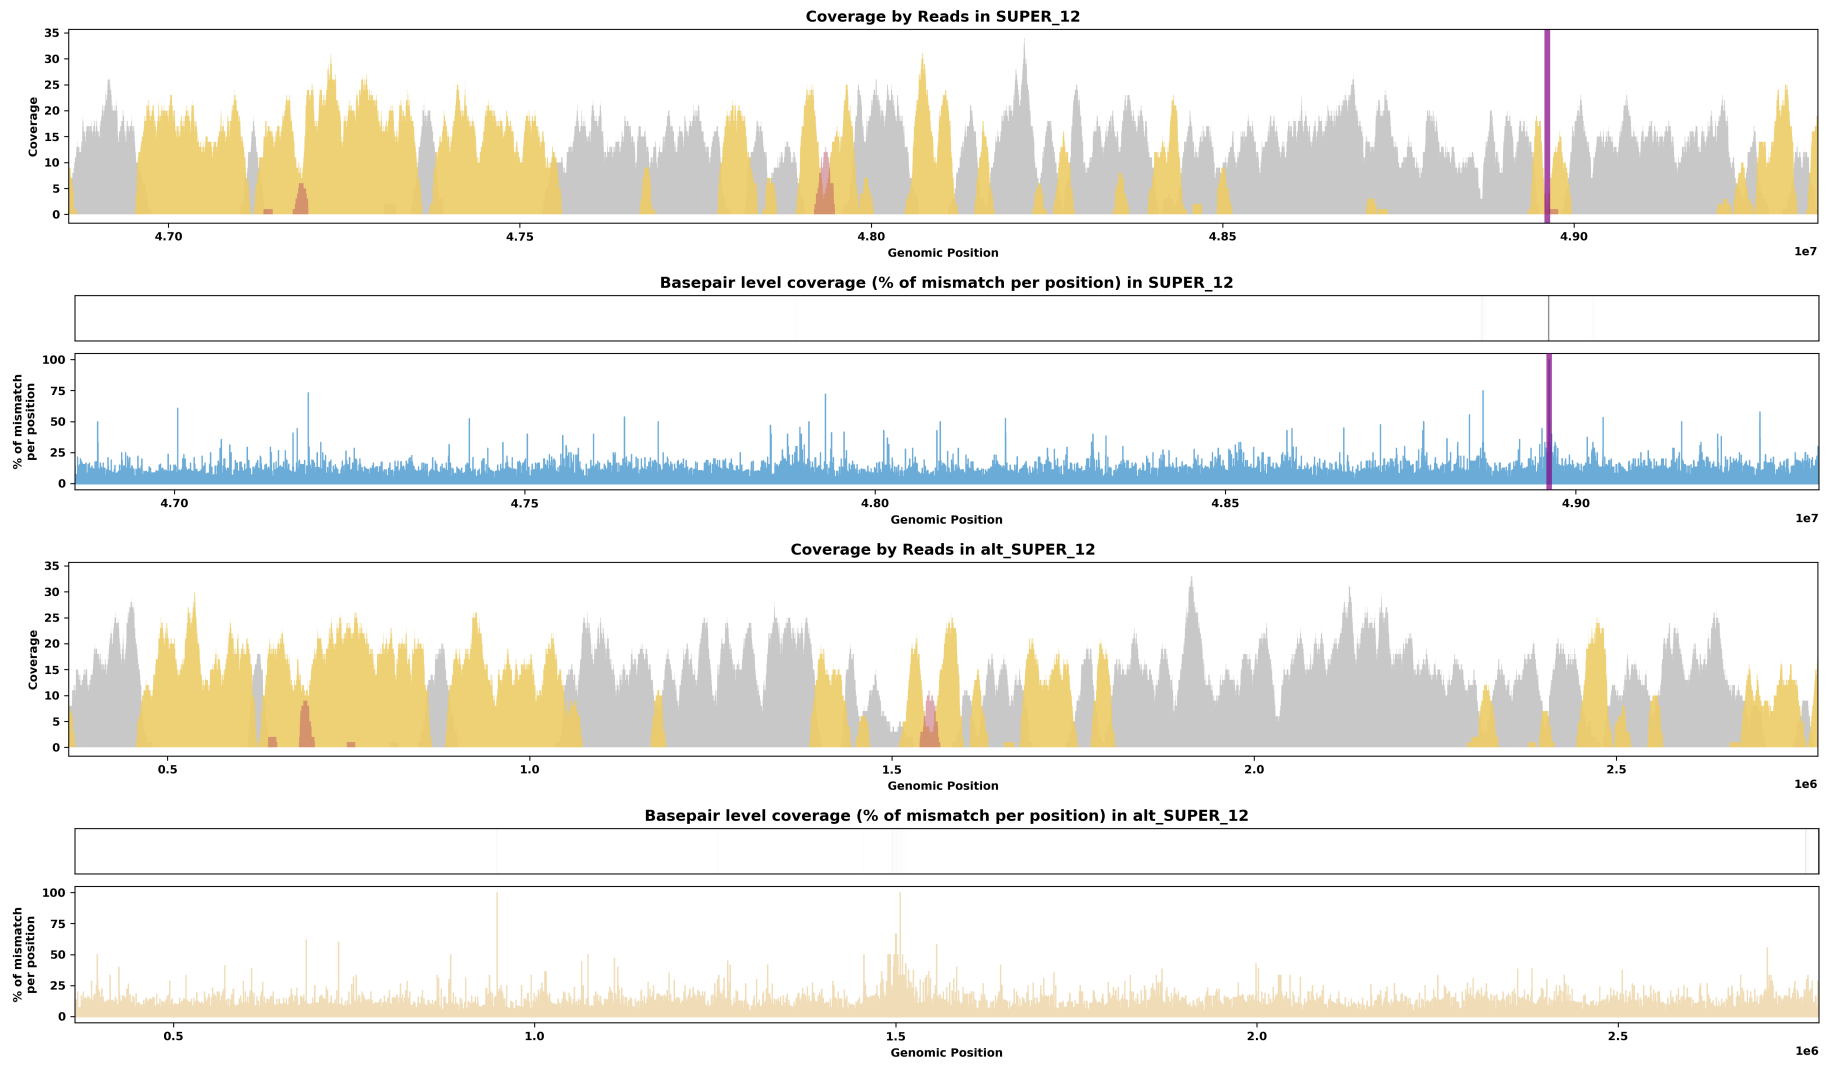

Species ID: rPodCre2

Common Name: cretan wall lizard

Scientific Name: Podarcis cretensis

Assembly Type: Not Haplotype Resolved

Data Source: VGP

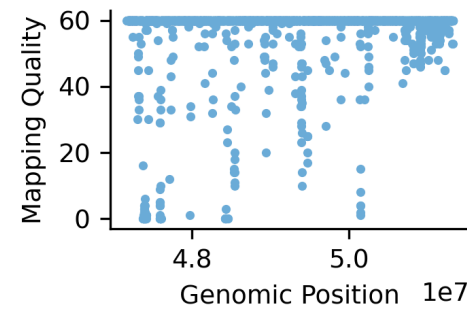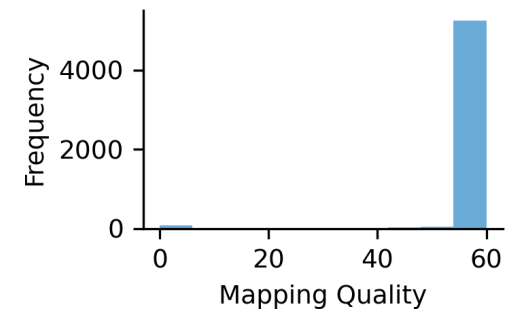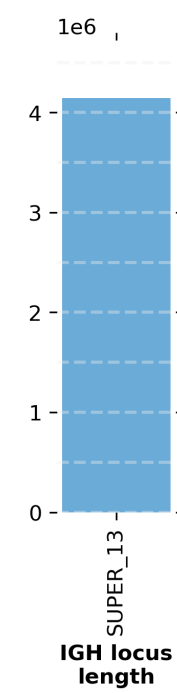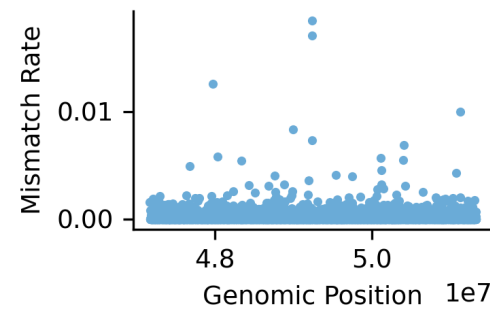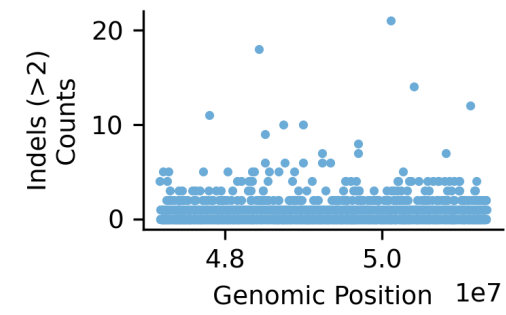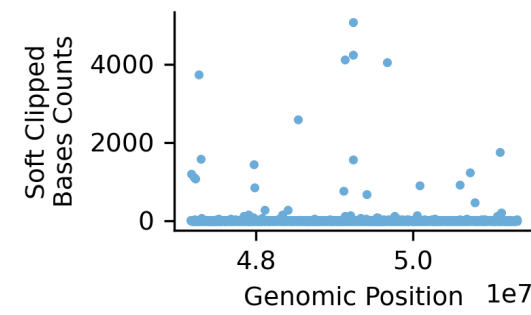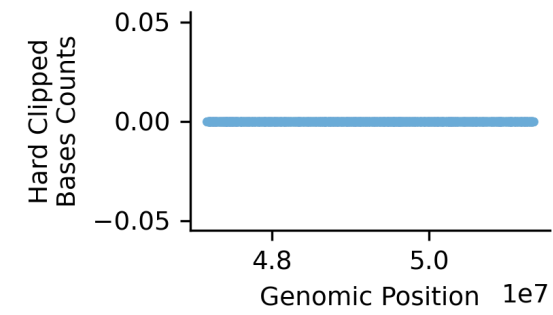

● SUPER\_13

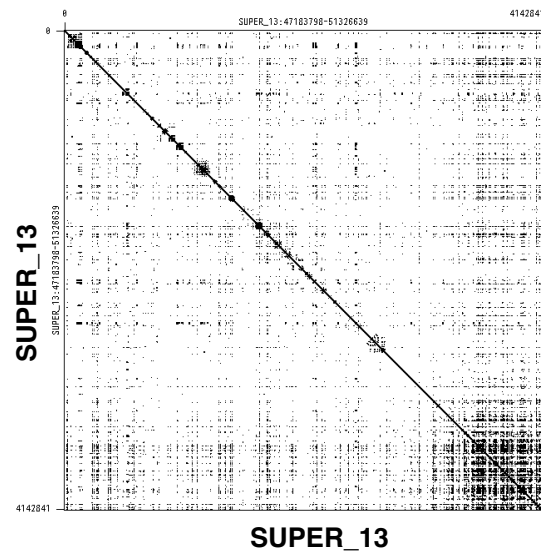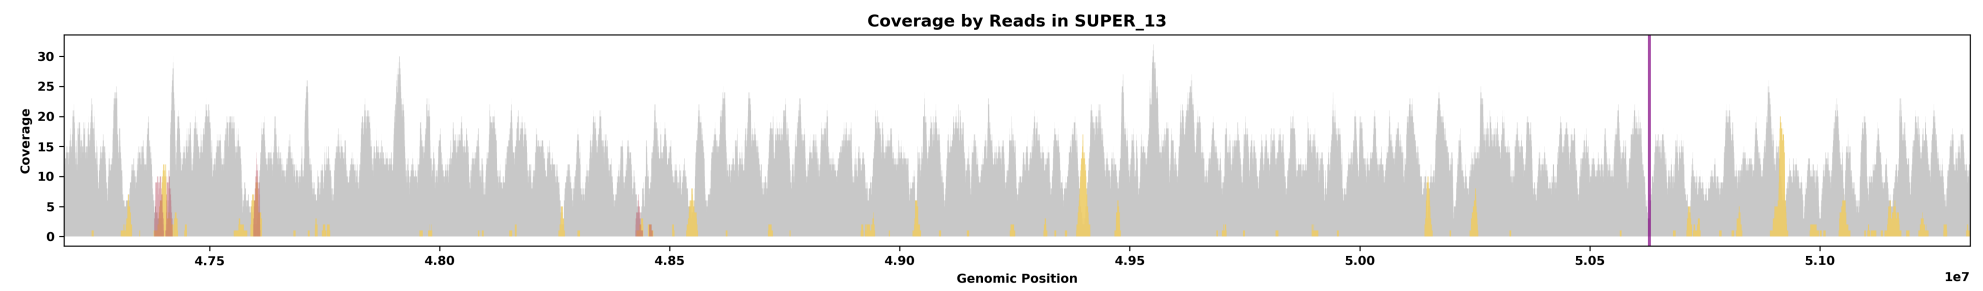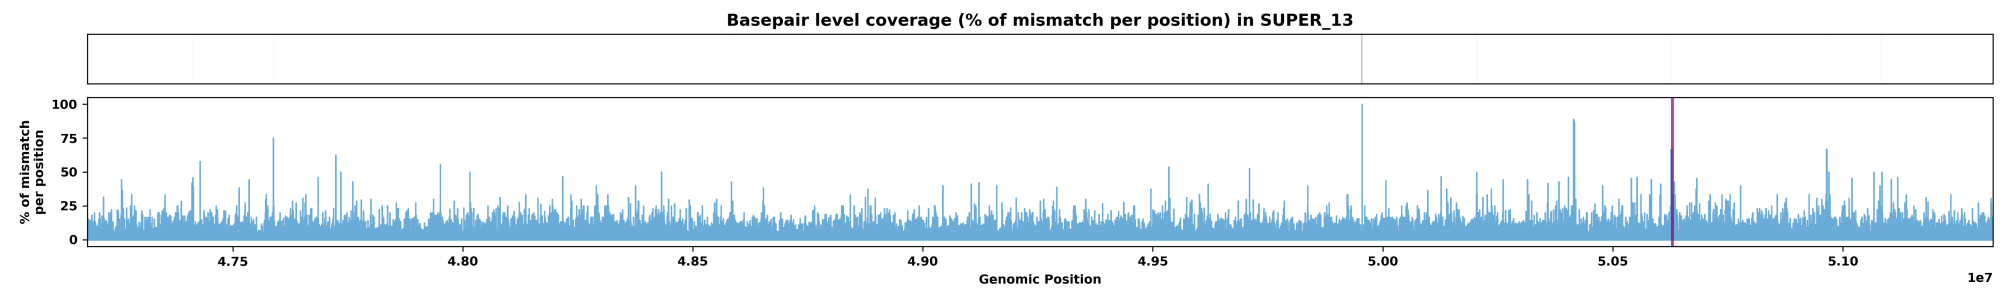

Species ID: rPodRaf1

Common Name: Aeolian wall lizard

Scientific Name: Podarcis raffonei

Assembly Type: Not Haplotype Resolved

Data Source: VGP

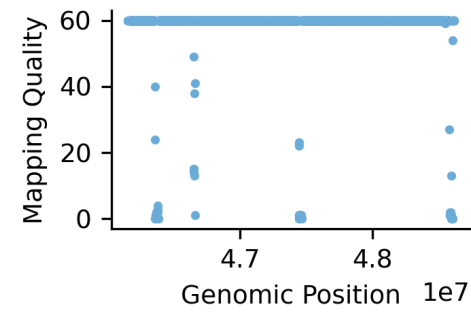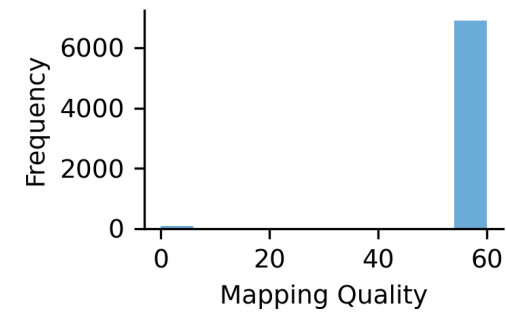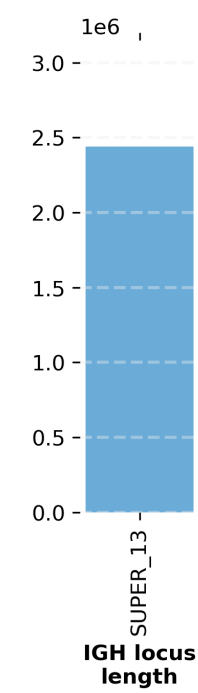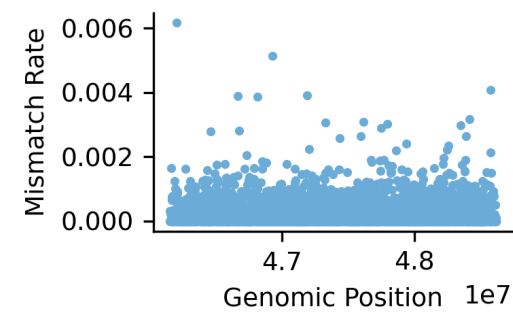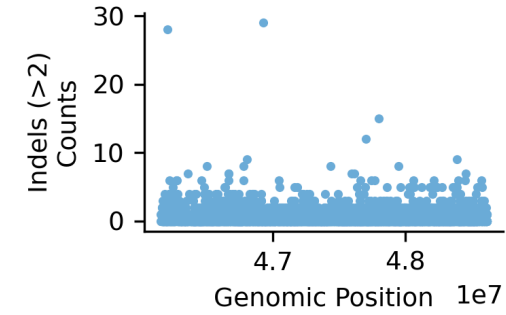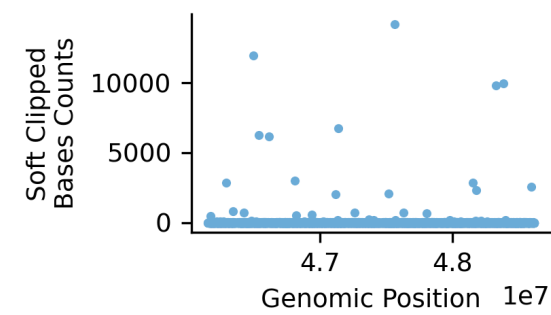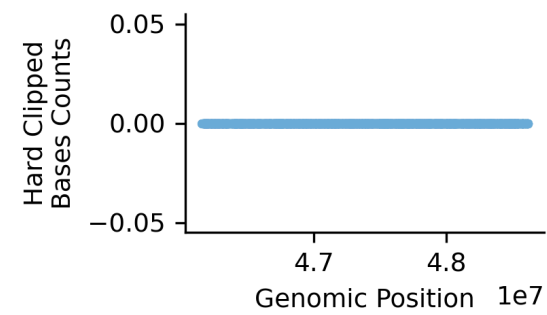

● SUPER\_13

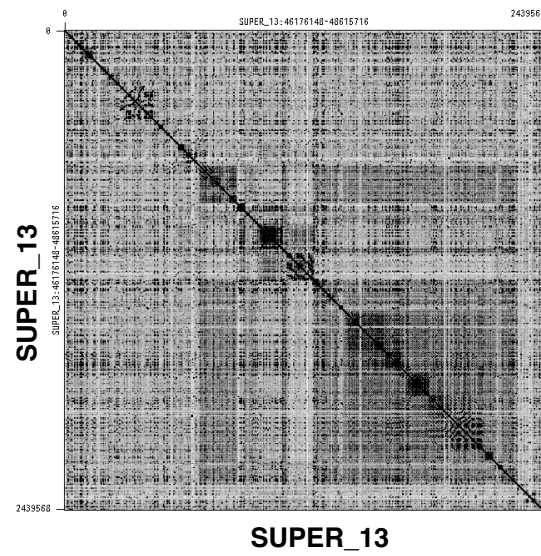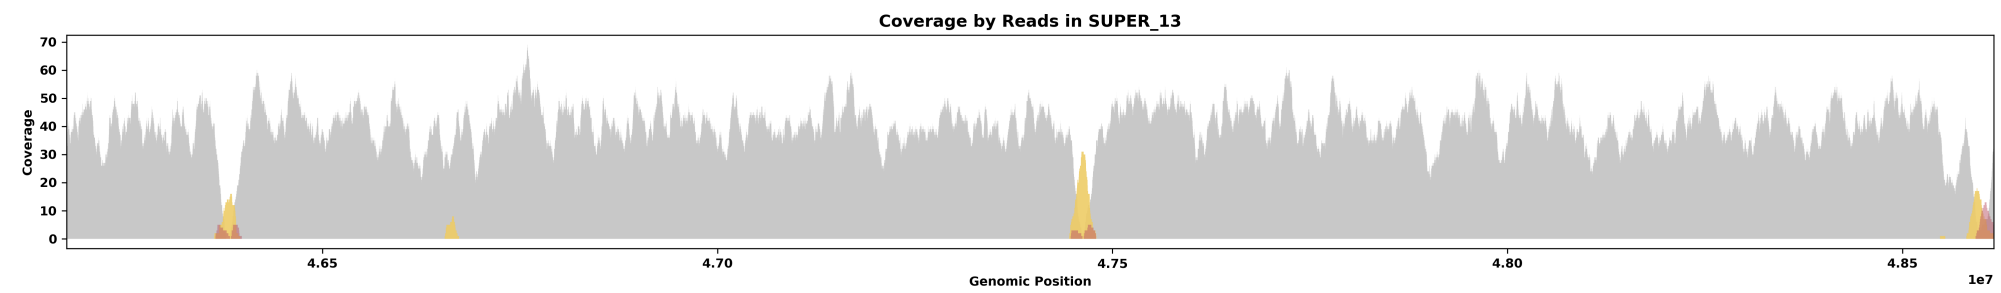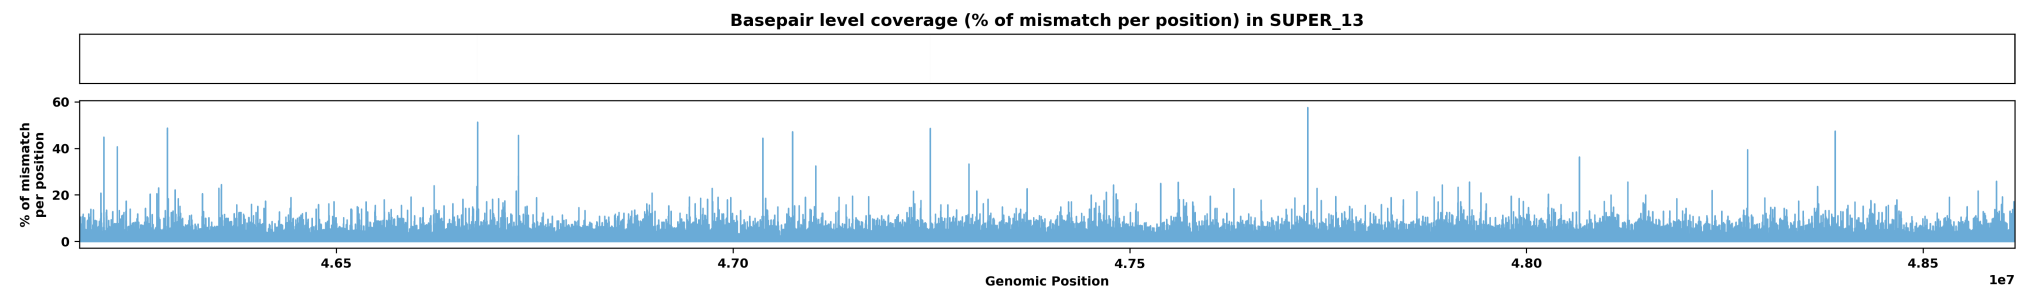

Species ID: rRhiFlo1  
 Common Name: Florida worm lizard  
 Scientific Name: Rhineura floridana  
 Assembly Type: Haplotype Resolved  
 Data Source: VGP

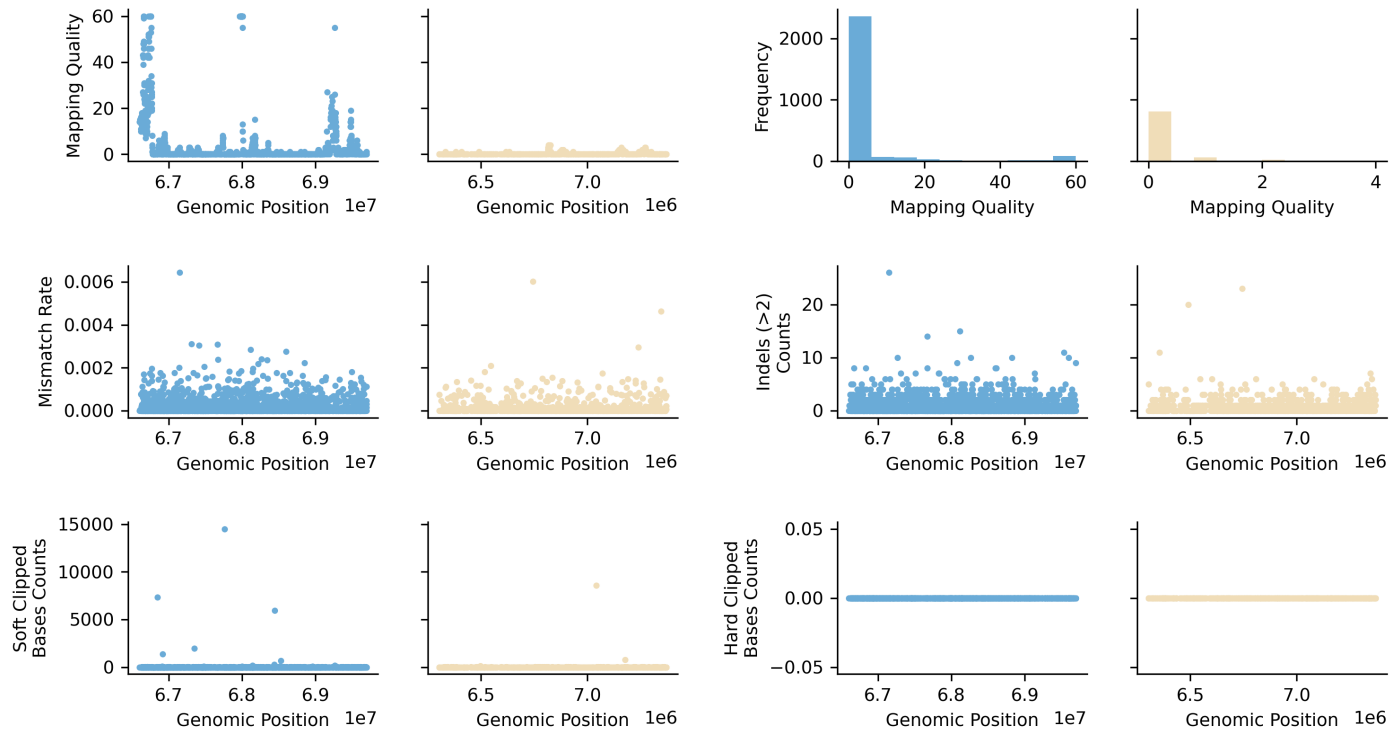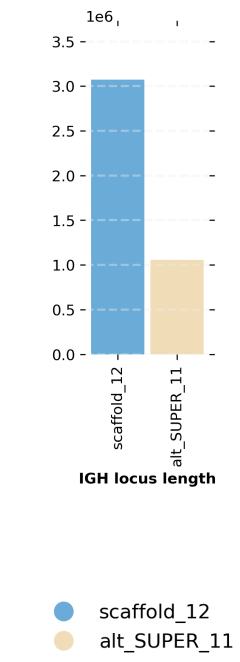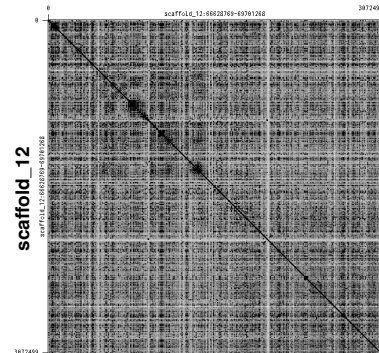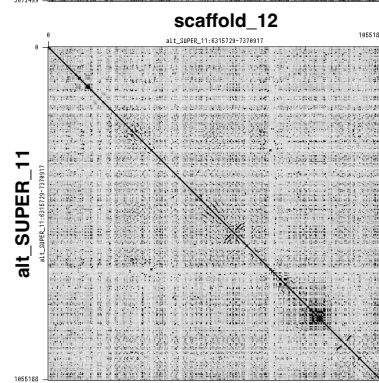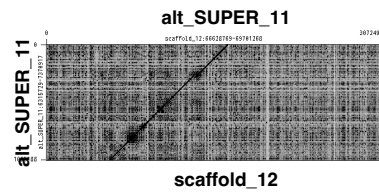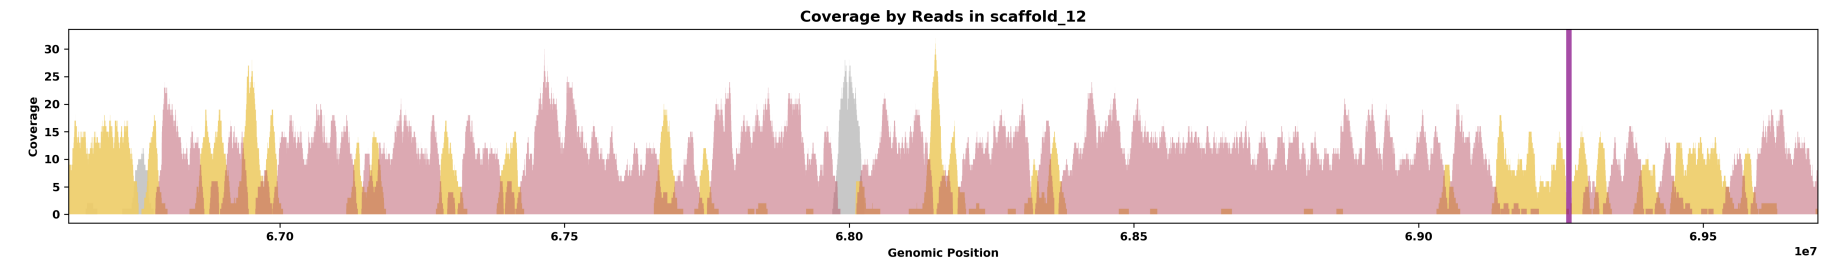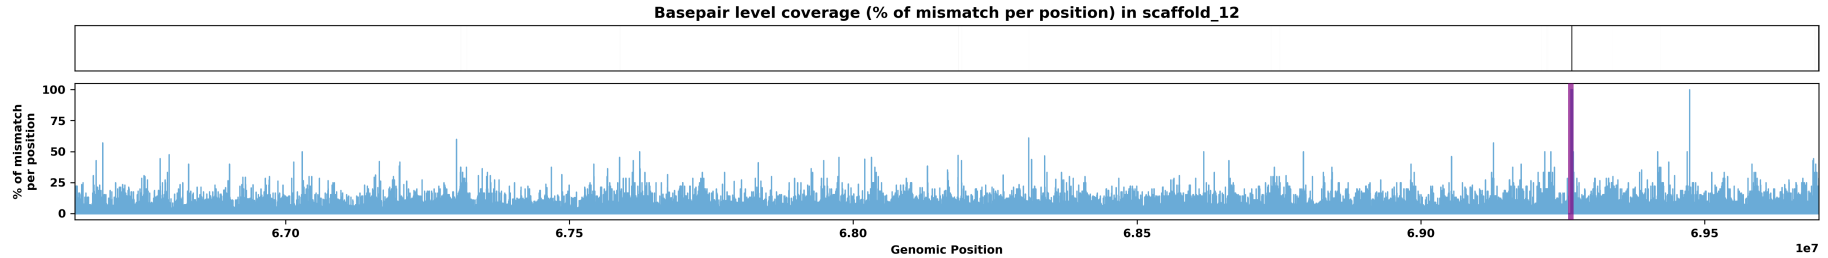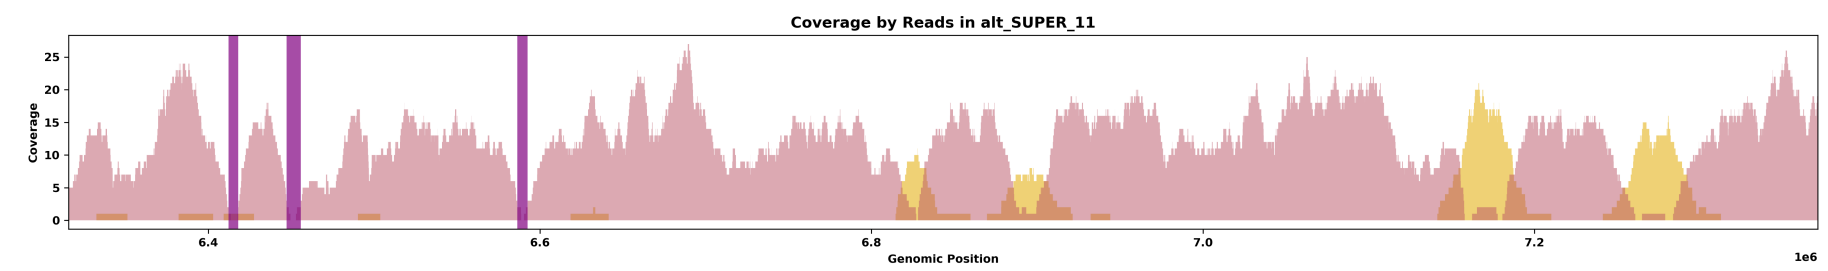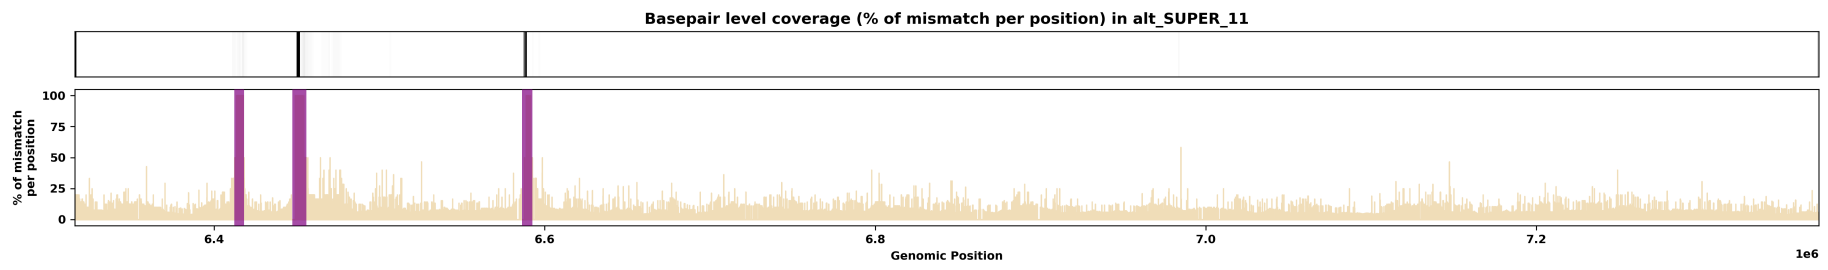

Species ID: rVipLat1

Common Name: snub-nosed viper

Scientific Name: *Vipera latastei*

Assembly Type: Not Haplotype Resolved

Data Source: VGP

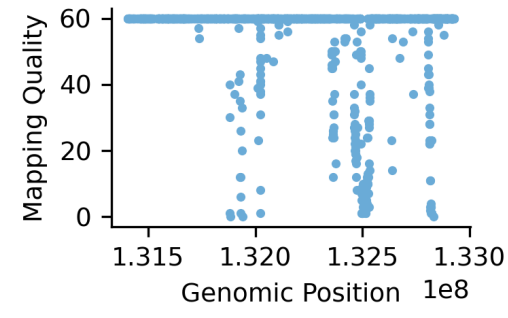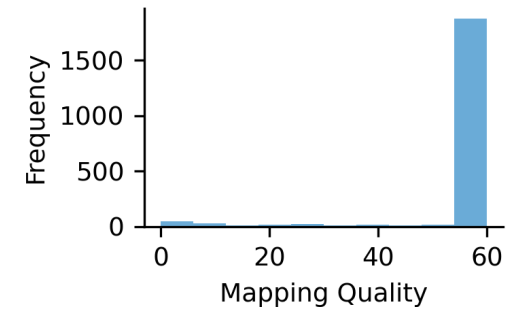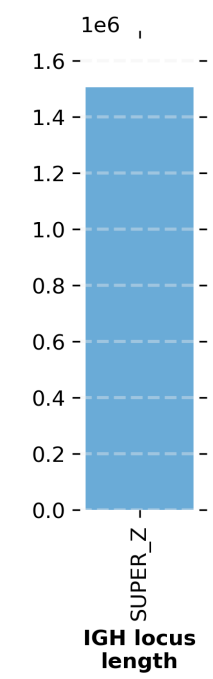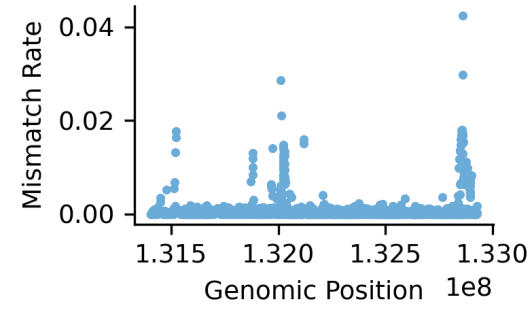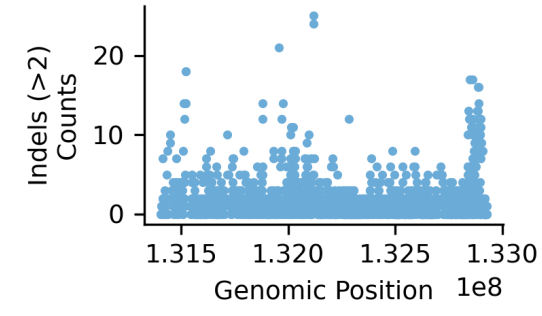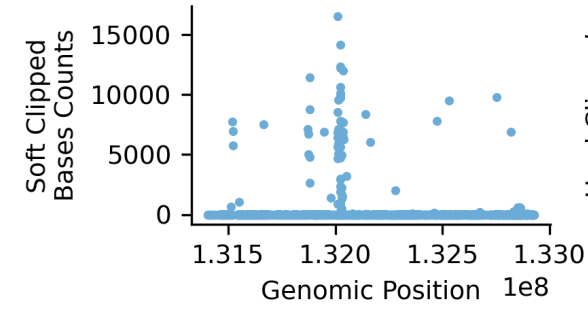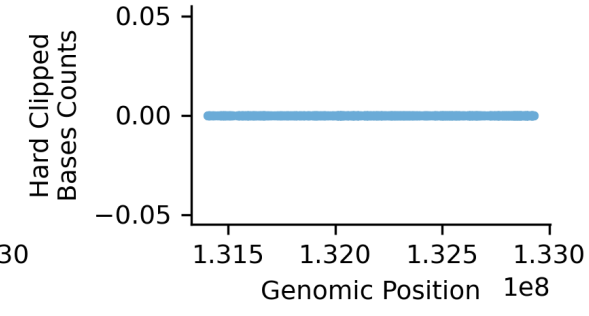

● SUPER\_Z

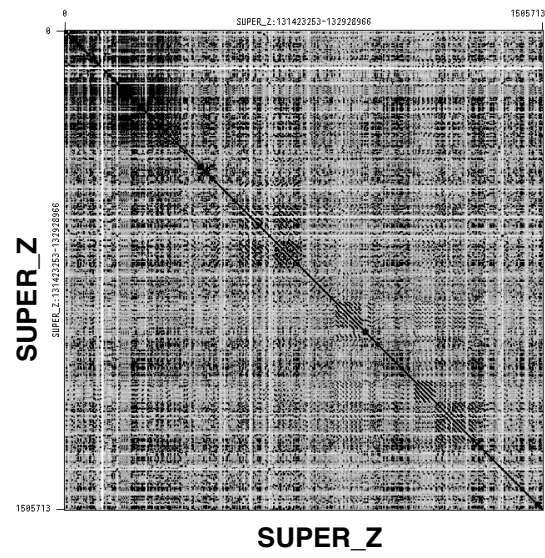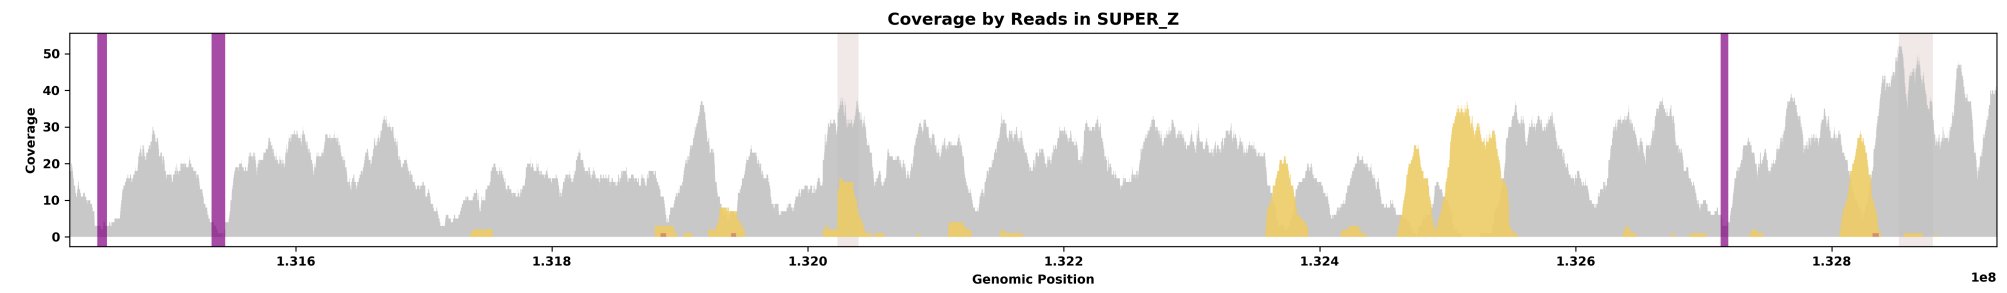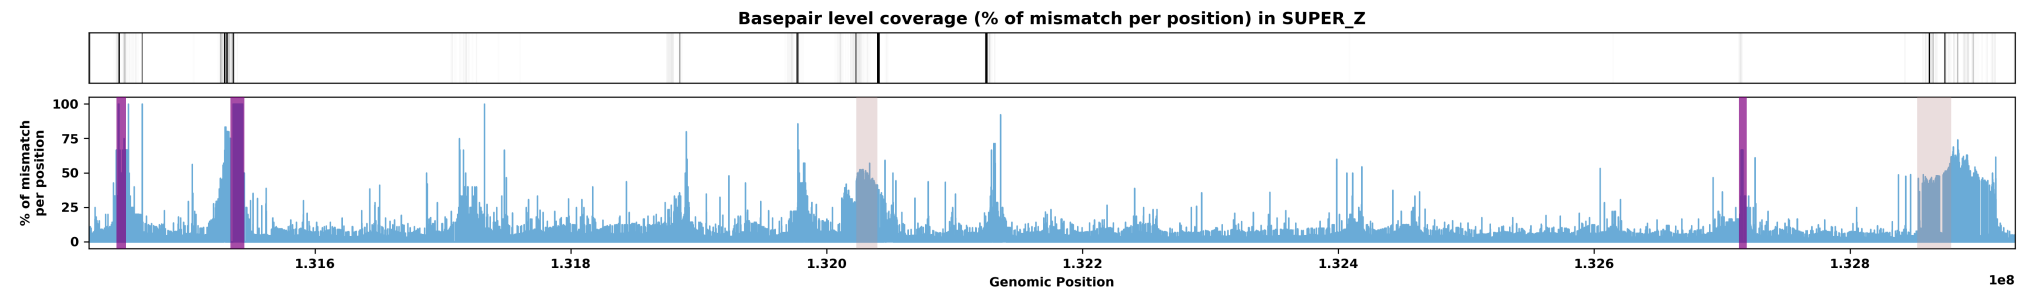

Species ID: rVipUrs1

Common Name: Hungarian meadow viper

Scientific Name: Vipera ursinii

Assembly Type: Not Haplotype Resolved

Data Source: VGP

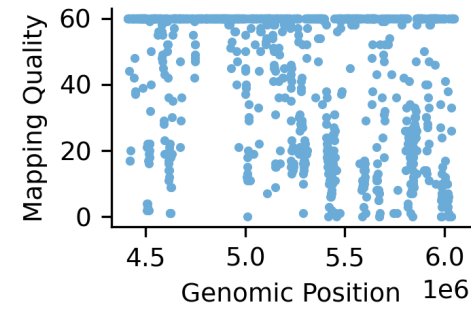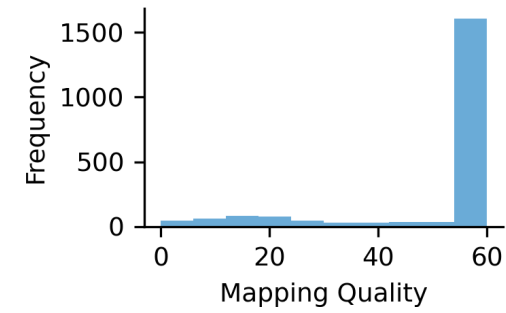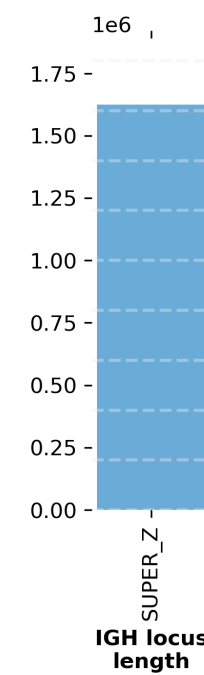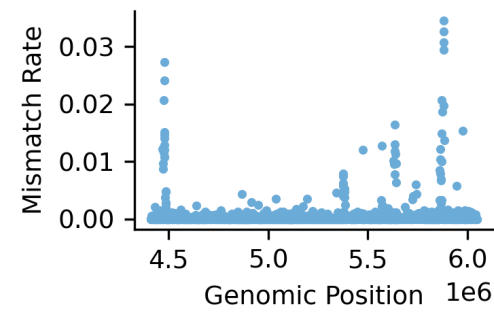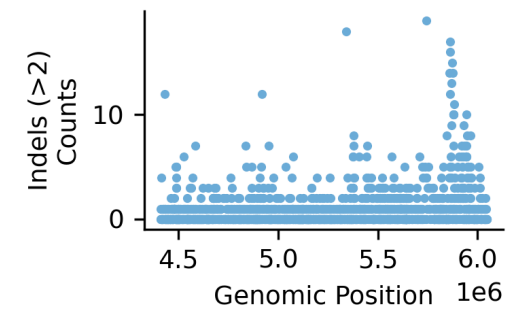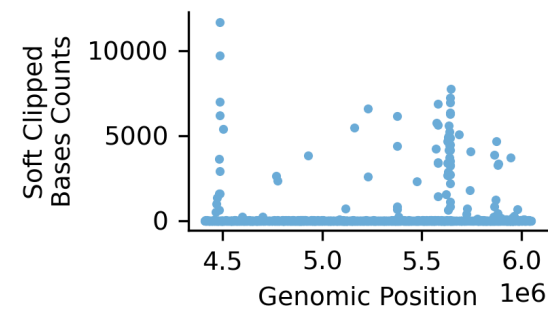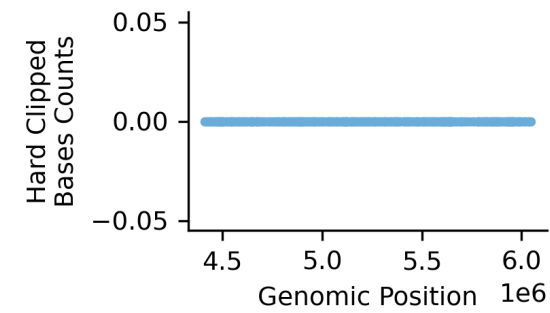

● SUPER\_Z

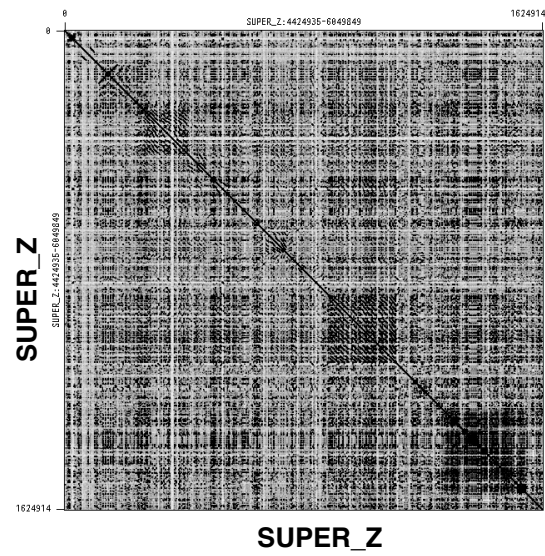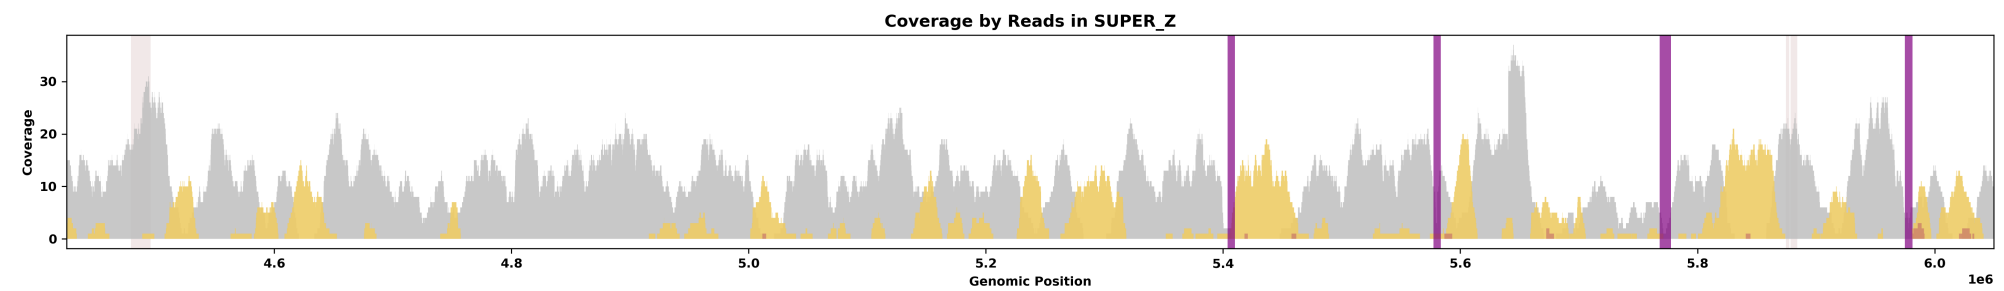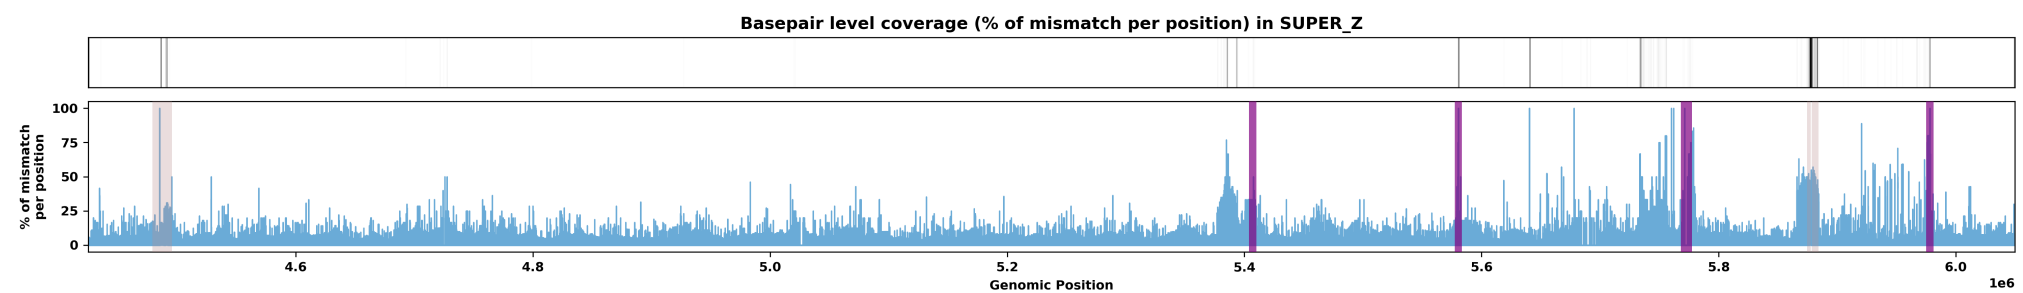

Species ID: rZooViv1

Common Name: common lizard

Scientific Name: Zootoca vivipara

Assembly Type: Not Haplotype Resolved

Data Source: VGP

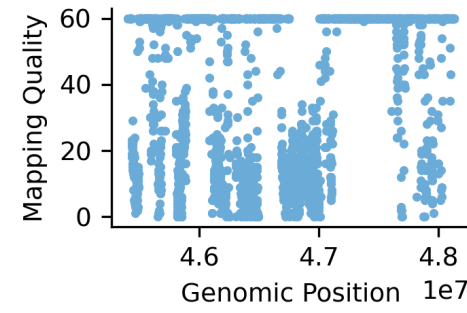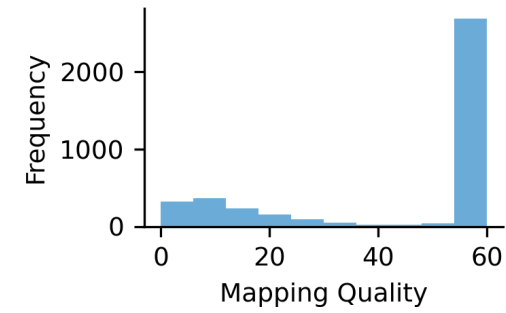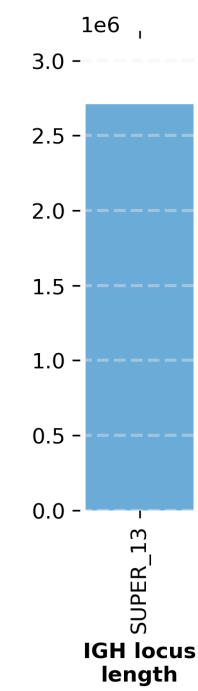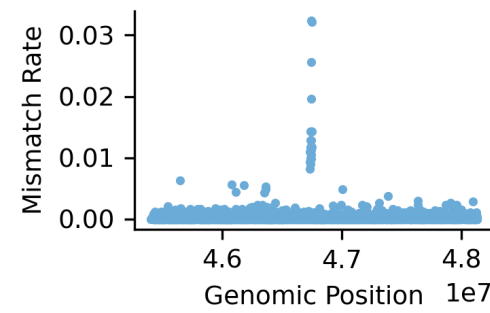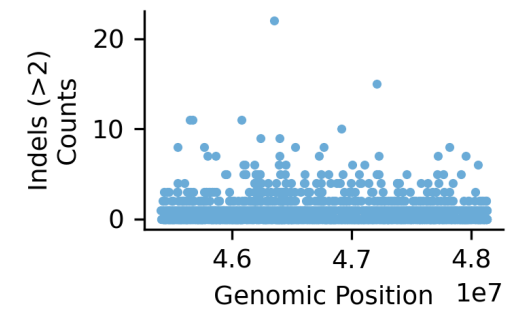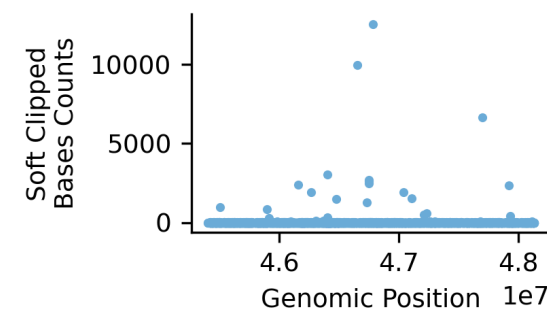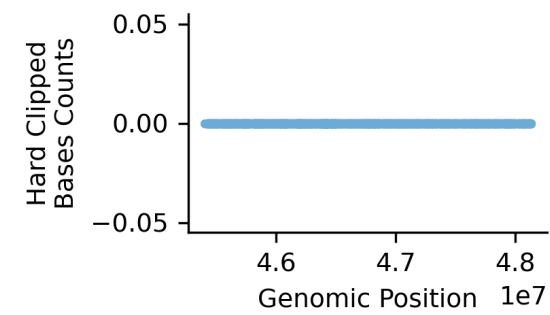

● SUPER\_13

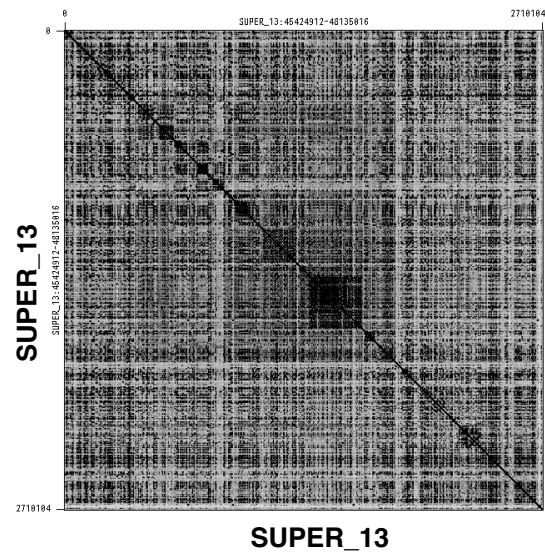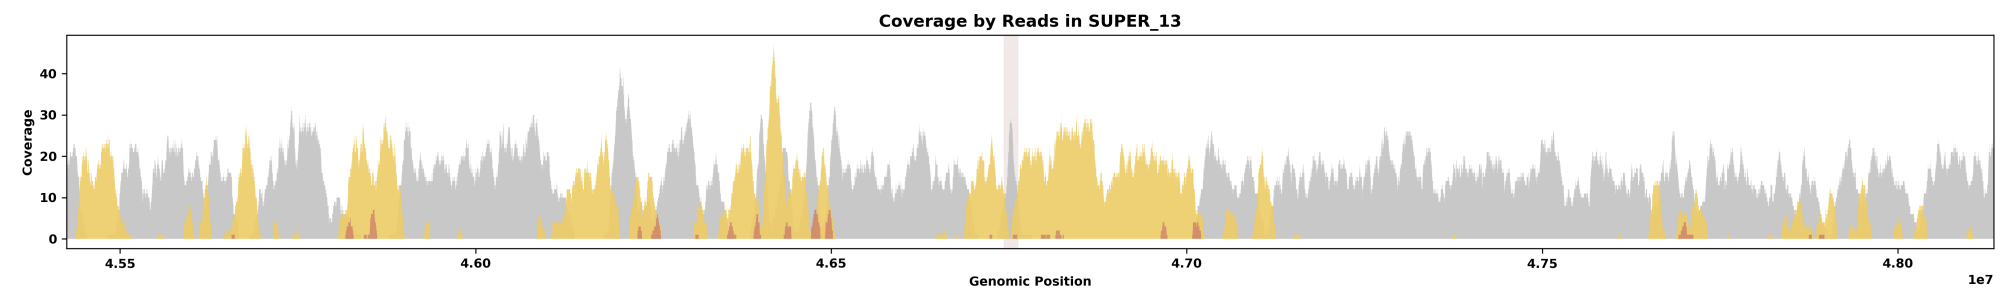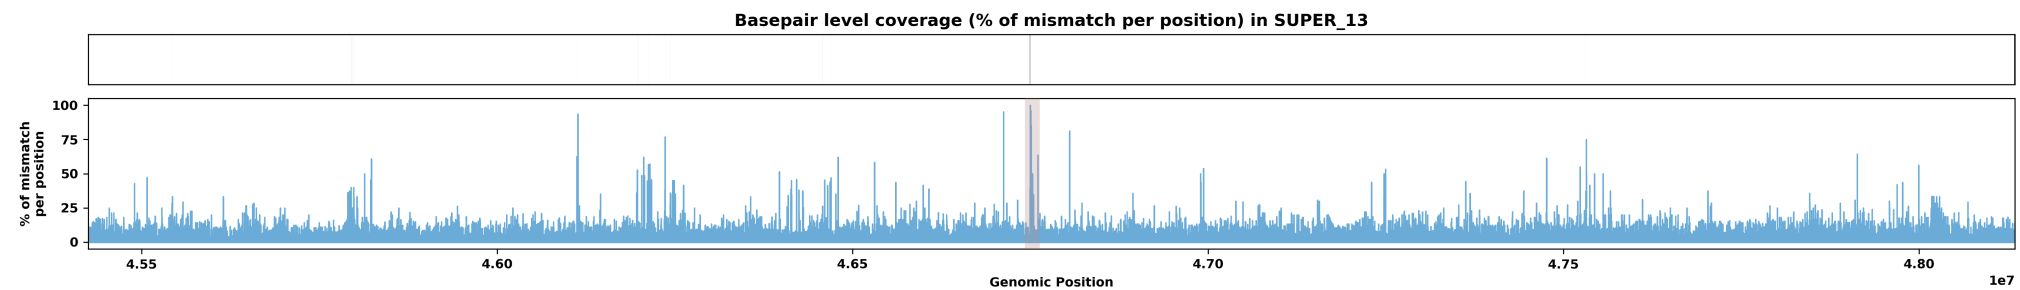

Supplement: media-2.pdf [file media-2.pdf]
