# Supplementary material
Source: PubMed Central journal article supplement (PMC11298965)

## Table of Contents

1. mApoSyl1 - Apodemus sylvaticus - Wood mouse
2. mBalAcu1 - Balaenoptera acutorostrata - Minke whale
3. mCamDro1 - Camelus dromedarius - Dromedary
4. mCanLor1 - Canis lupus - Greenland Wolf
5. mCanLor2 - Canis lupus - Greenland Wolf
6. mCerEla1 - Cervus elaphus - Red Deer
7. mChiNiv1 - Chionomys nivalis - European snow vole
8. mDasNov1 - Dasypus novemcinctus - Nine-banded armadillo
9. mDelDel1 - Delphinus delphis - Saddleback dolphin
10. mDicBic1 - Diceros bicornis - Black rhinoceros
11. mDipMer1 - Dipodomys merriami - Merriam's Kangaroo Rat
12. mEleMax1 - Elephas maximus - Asiatic Elephant
13. mEriEur2 - Erinaceus europaeus - Western European hedgehog
14. mEscRob2 - Eschrichtius robustus - Grey whale
15. mEubGla1 - Eubalaena glacialis - North Atlantic right whale
16. mGloMel1 - Globicephala melas - Long-finned pilot whale
17. mGorGor1 - Gorilla gorilla - Gorilla
18. mHetBru1 - Heterohyrax brucei - Yellow-spotted hyrax
19. mHipAmp2 - Hippopotamus amphibius kiboko - Hippopotamus
20. mHypAmp2 - Hyperoodon ampullatus - Northern bottlenose whale
21. mLagAlb1 - Lagenorhynchus albirostris - White-beaked dolphin
22. mLemCat1 - Lemur catta - Ring-tailed lemur
23. mLynRuf1 - Lynx rufus - Bobcat
24. mMacEug1 - Macropus eugenii - Tammar wallaby
25. mManPen7 - Manis pentadactyla - Chinese pangolin
26. mMarMar1 - Martes martes - European pine marten
27. mMelMel3 - Meles meles - European badger
28. mMesDen1 - Mesoplodon densirostris - Blainville's beaked whale
29. mMicCal1.0 - Microtus californicus - California Vole
30. mMicMin1 - Micromys minutus - European harvest mouse
31. mMirAng1 - Mirounga angustirostris - Northern Elephant Seal
32. mMonDom1 - Monodelphis domestica - Gray short-tailed opossum
33. mMunRee1 - Muntiacus reevesi - Reeves' muntjac
34. mMusAve1 - Muscardinus avellanarius - Hazel dormouse
35. mMusLut2 - Mustela lutreola - European mink
36. mMusNiv1 - Mustela nivalis - Least weasel
37. mNeoNeb1 - Neofelis nebulosa - Clouded Leopard
38. mNycCou1 - Nycticebus coucang - Slow loris
39. mOrcOrc1 - Orcinus orca - Killer whale
40. mOryCun1 - Oryctolagus cuniculus - Rabbit
41. mPanPan1 - Pan paniscus - Bonobo
42. mPerMan1 - Peromyscus maniculatus - Deer mouse
43. mPhoPho1 - Phocoena phocoena - Harbor porpoise
44. mPonAbe1 - Pongo abelii - Sumatran orangutan
45. mPonPyg2 - Pongo pygmaeus - Bornean orangutan
46. mPseCra1 - Pseudorca crassidens - False killer whale
47. mPumCon1.1 - Puma concolor - Mountain Lion
48. mSorAra2/1 - Sorex araneus - Common shrew
49. mSteCoe1 - Stenella coeruleoalba - Striped dolphin
50. mTalEur1 - Talpa europaea - European mole
51. mThoBot1 - Thomomys bottae - Botta's pocket gopher
52. mUrsAme1 - Ursus americanus - American black bear
53. mUrsArc2 - Ursus arctos - Brown bear
54. rAllMis2 - Alligator mississippiensis - American alligator
55. rCarCar2 - Caretta caretta - Loggerhead turtle
56. rEmyOrb1 - Emys orbicularis - European pond turtle
57. rMalTer1 - Malaclemys terrapin - Diamondback terrapin

Note: This supplementary material only displays alternate IG loci if they are longer than one-quarter of the corresponding primary IG locus length. Loci shorter than this threshold are typically too fragmented to be shown. 11 species had alternate IGK loci shorter than this threshold and are not shown.

Species ID: mApoSyl1  
 Common Name: wood mouse  
 Scientific Name: Apodemus sylvaticus  
 Assembly Type: Not Haplotype Resolved  
 Data Source: VGP

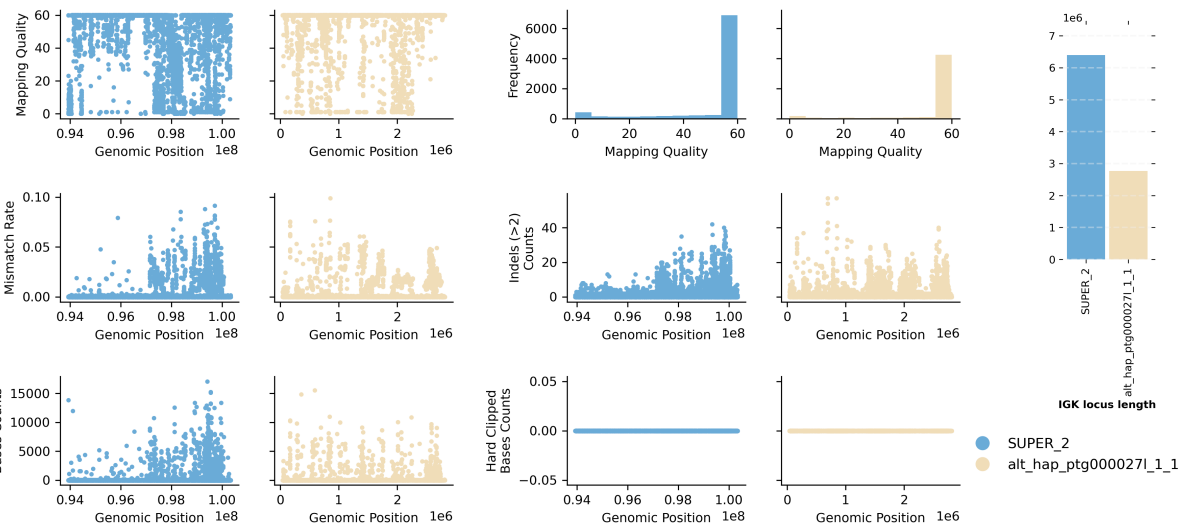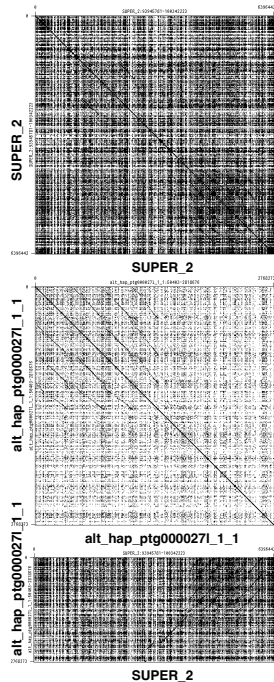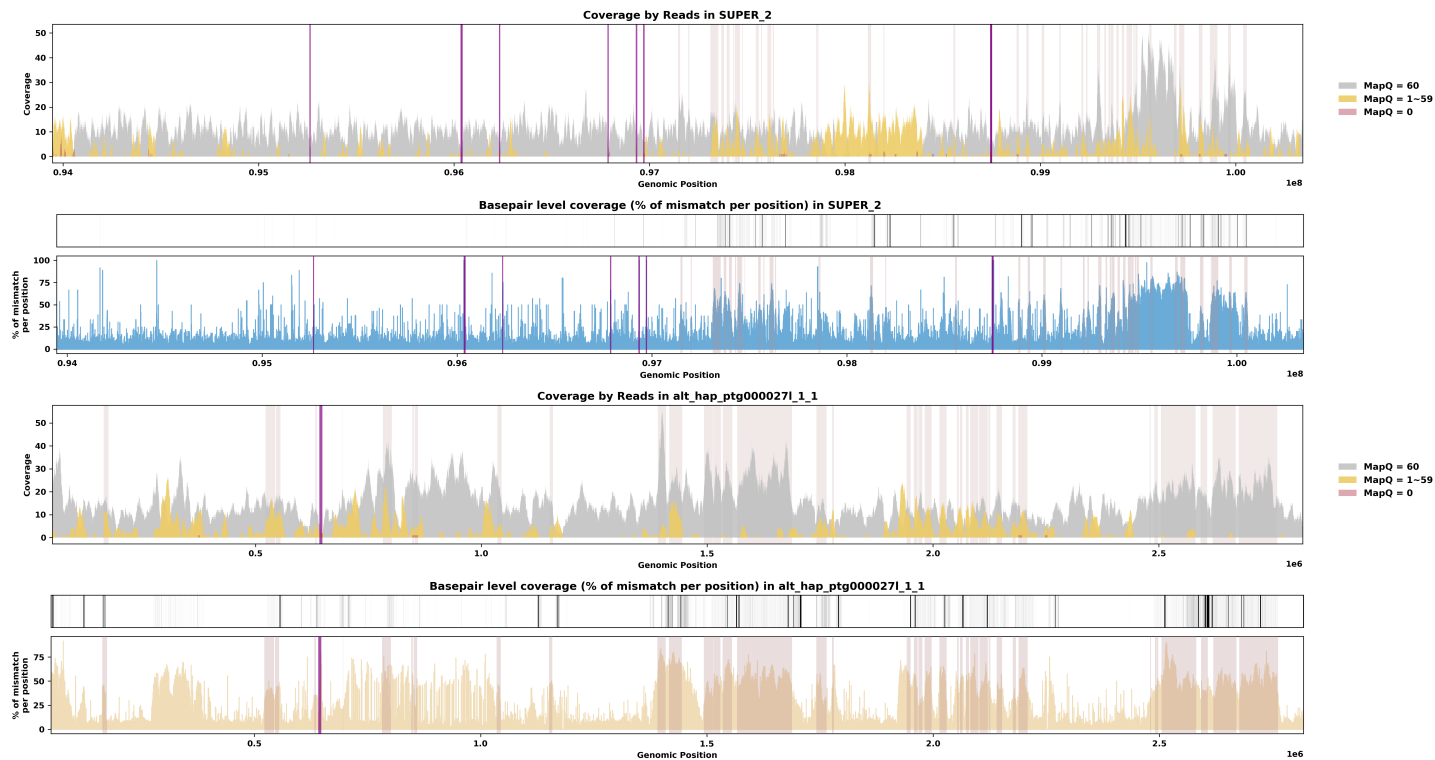

Species ID: mBalAcu1

Common Name: minke whale

Scientific Name: Balaenoptera\_acutorostrata

Assembly Type: Not Haplotype Resolved

Data Source: VGP

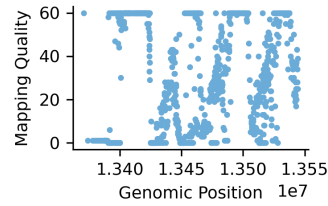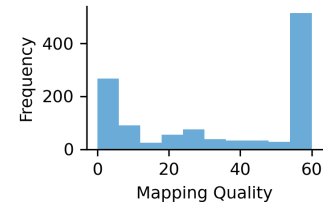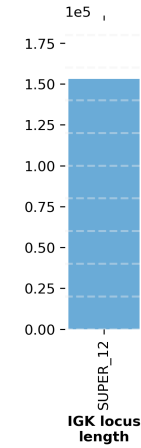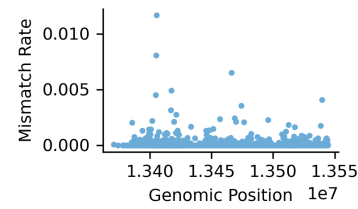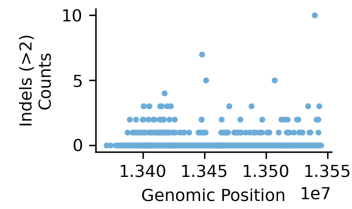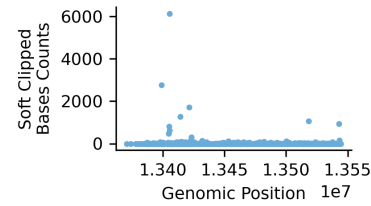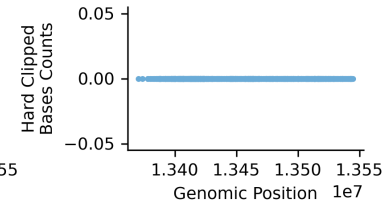

● SUPER\_12

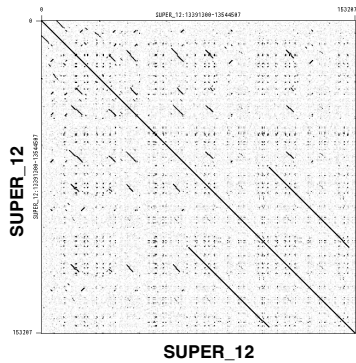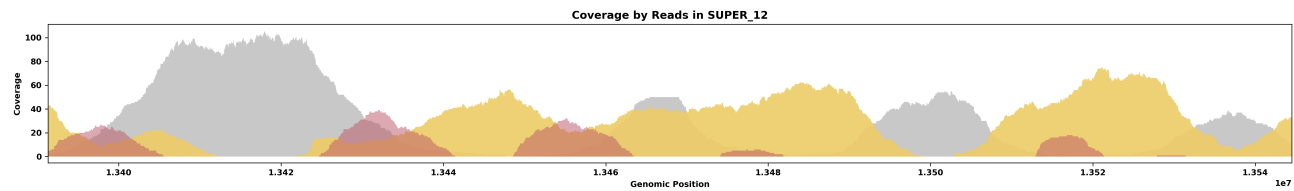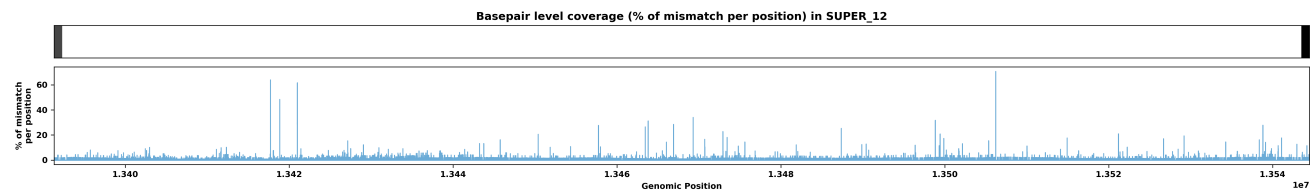

Species ID: mCamDro1  
 Common Name: dromedary  
 Scientific Name: Camelus dromedarius  
 Assembly Type: Haplotype Resolved  
 Data Source: VGP

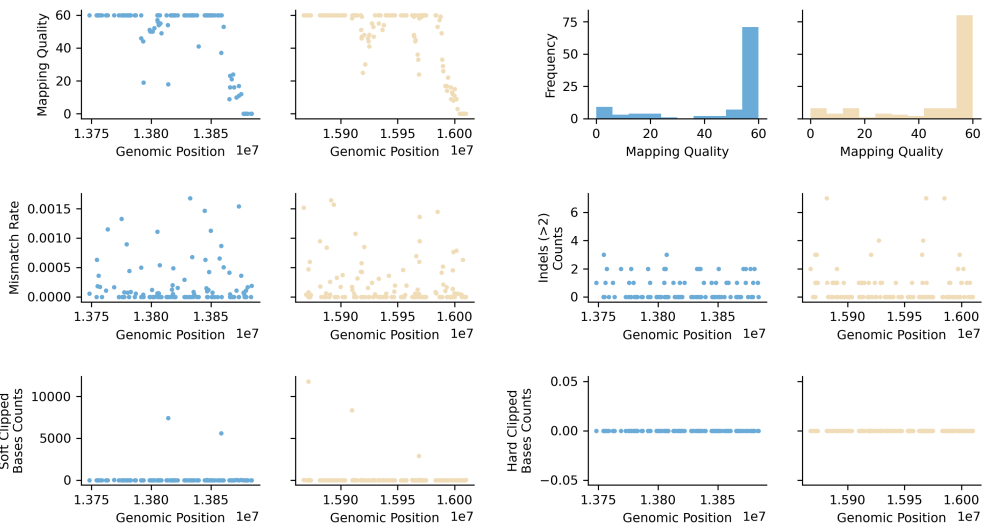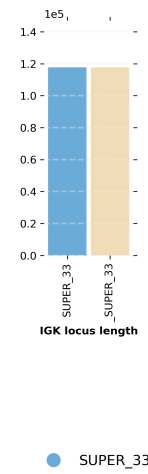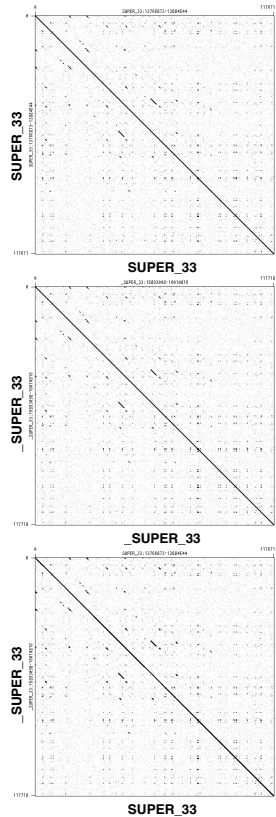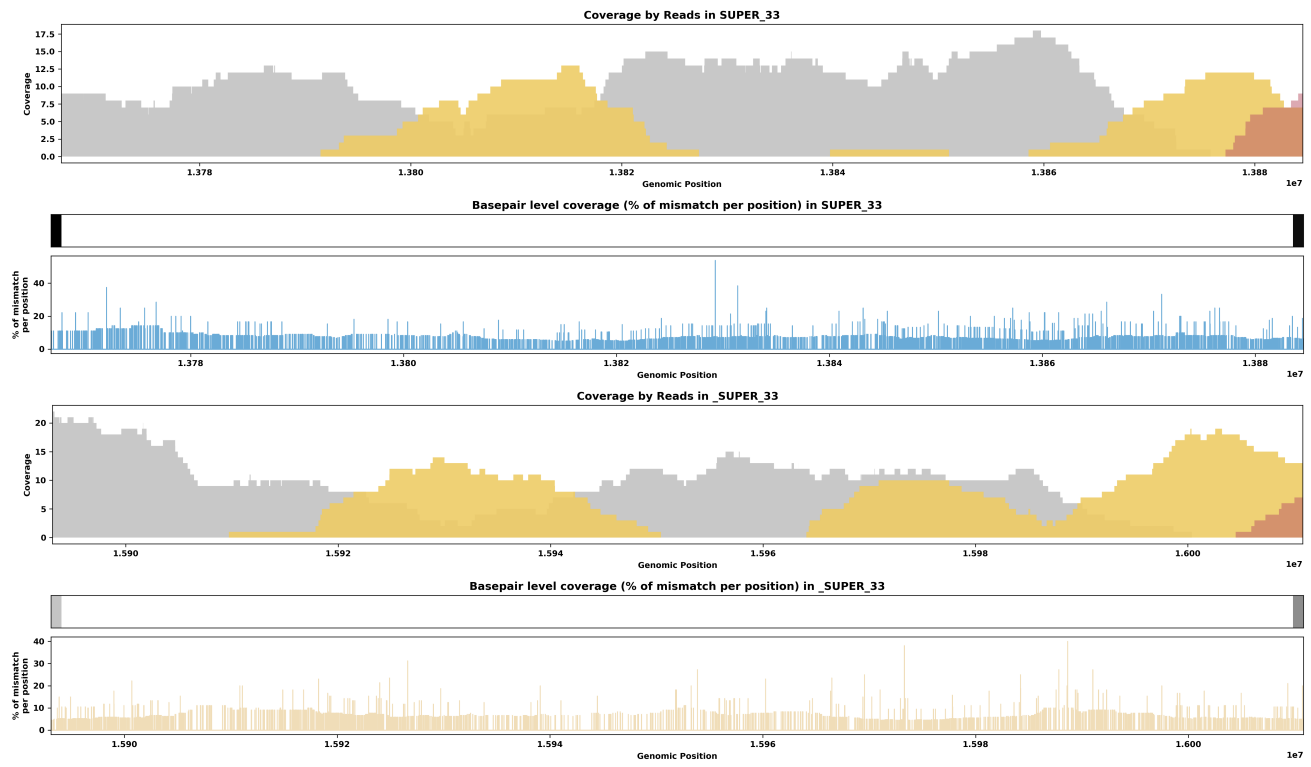

Species ID: mCanLor1  
 Common Name: Greenland Wolf  
 Scientific Name: *Canis lupus*  
 Assembly Type: Not Haplotype Resolved  
 Data Source: VGP

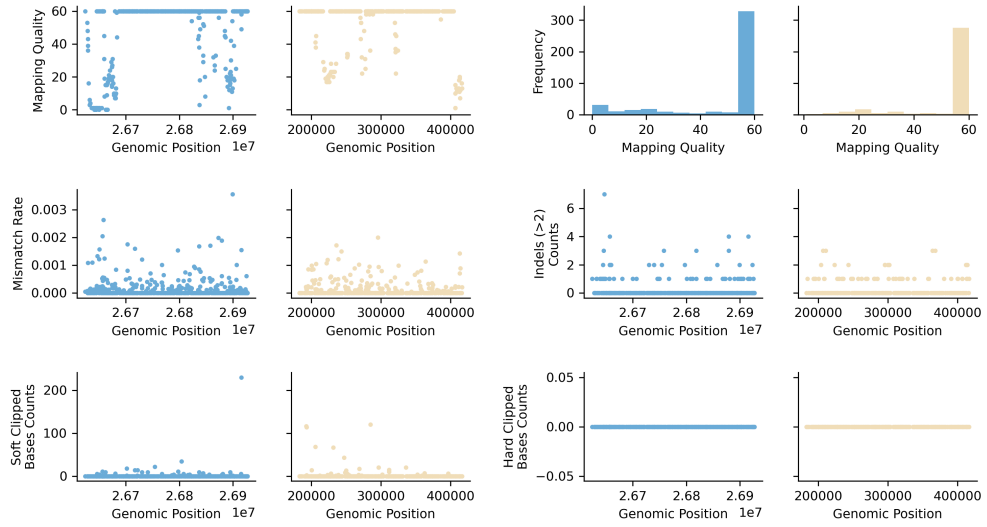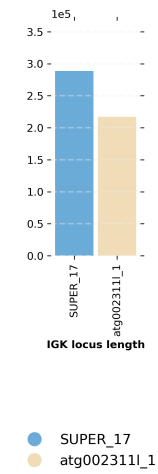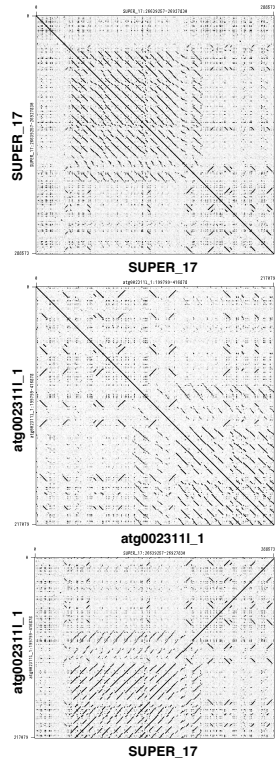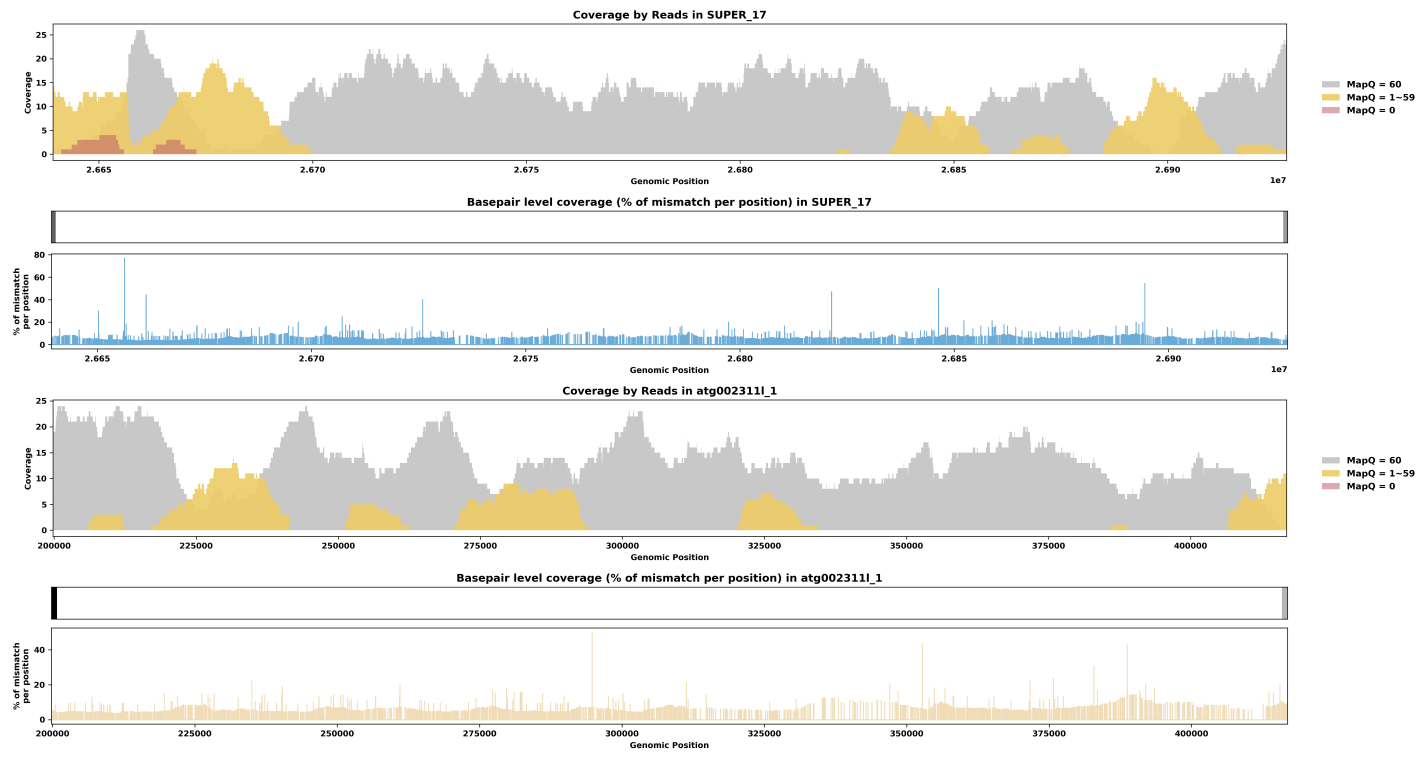

Species ID: mCanLor2  
 Common Name: Greenland Wolf  
 Scientific Name: *Canis lupus*  
 Assembly Type: Haplotype Resolved  
 Data Source: VGP

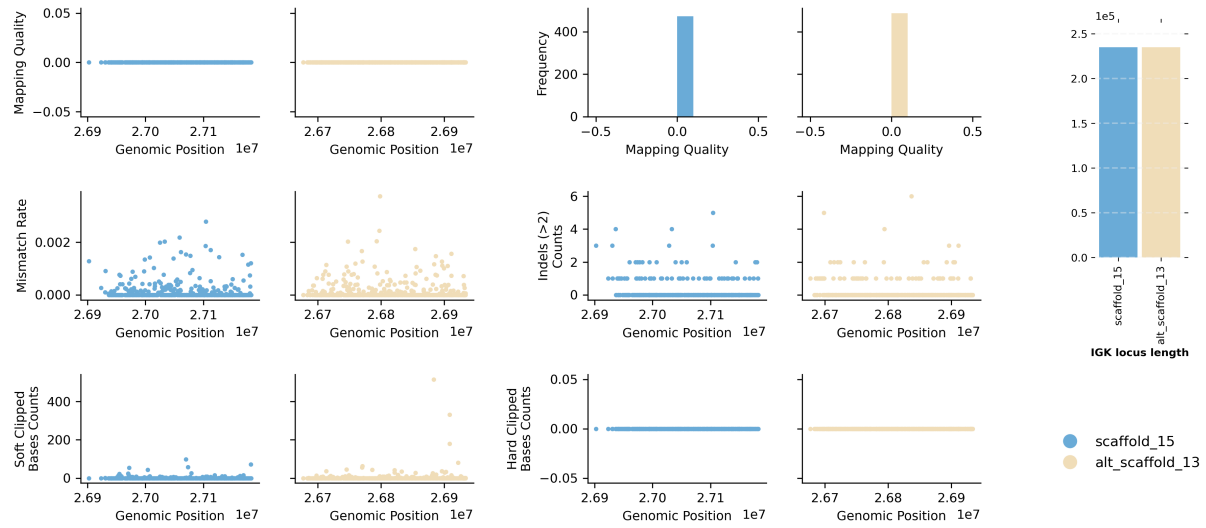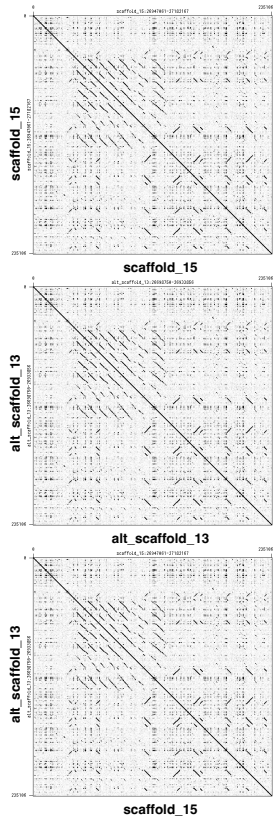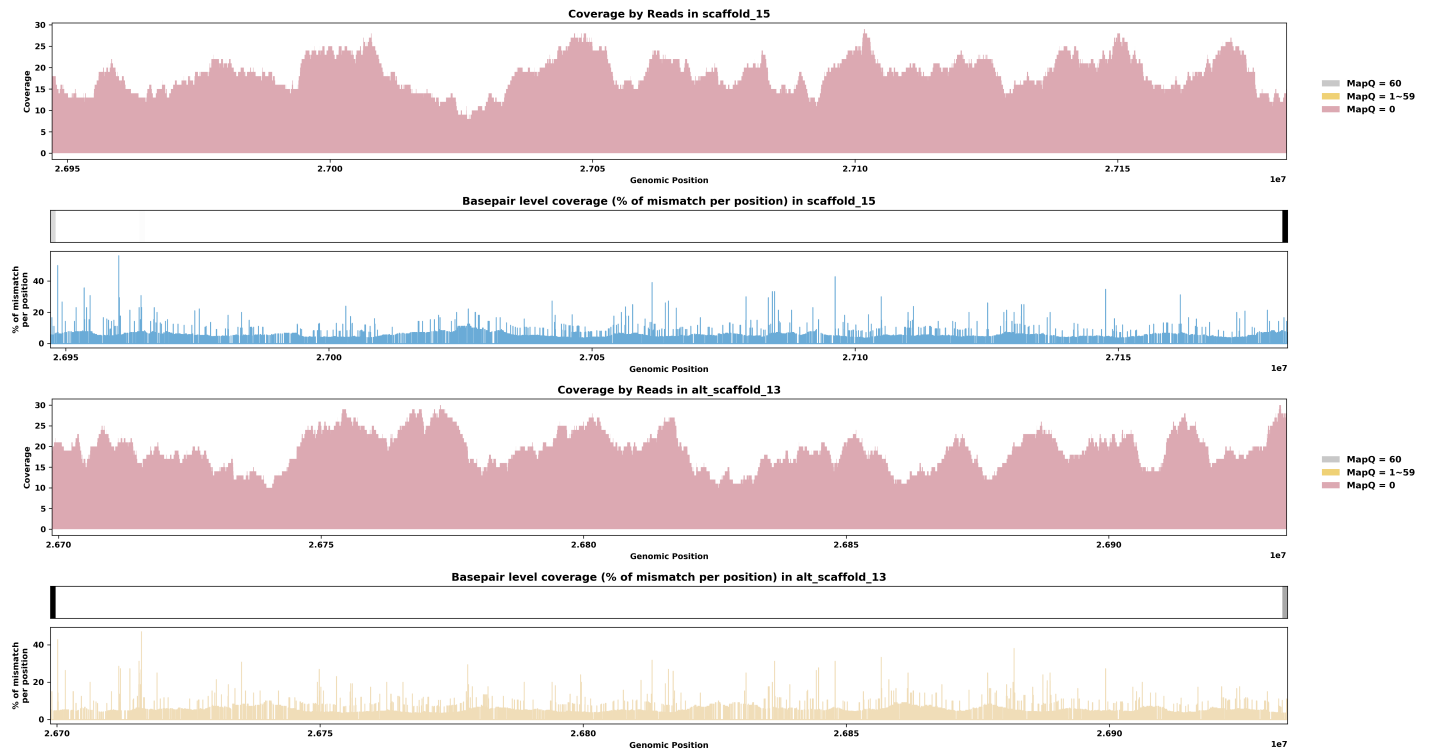

Species ID: mCerEla1  
 Common Name: Red Deer  
 Scientific Name: Cervus\_elaphus  
 Assembly Type: Not Haplotype Resolved  
 Data Source: VGP

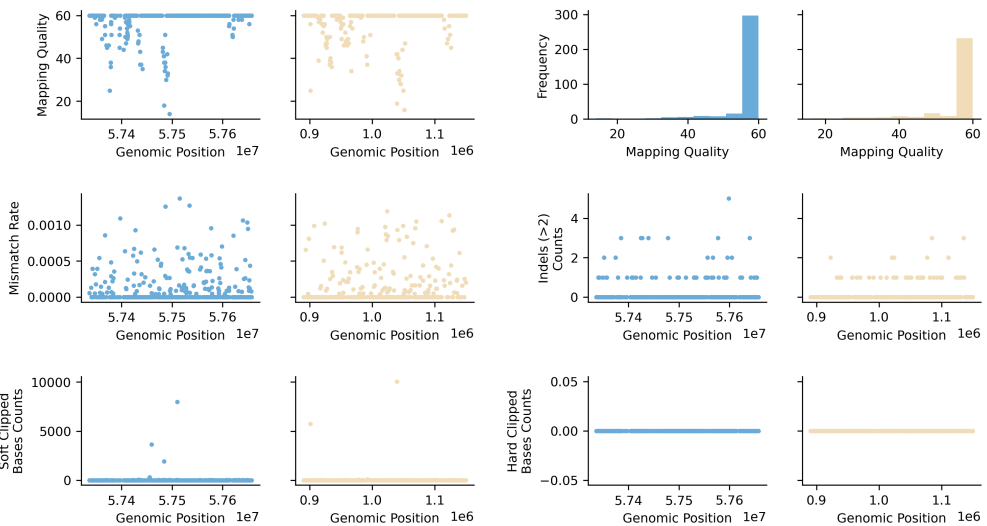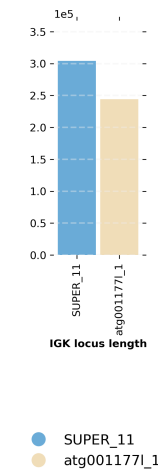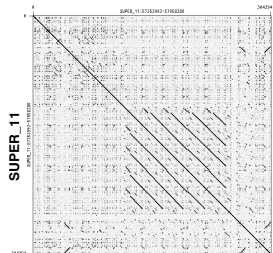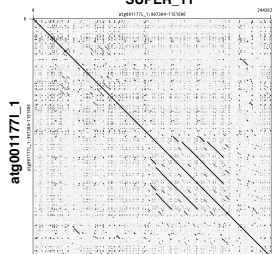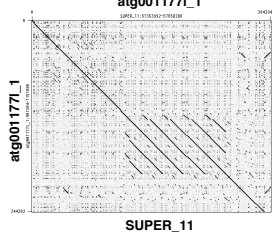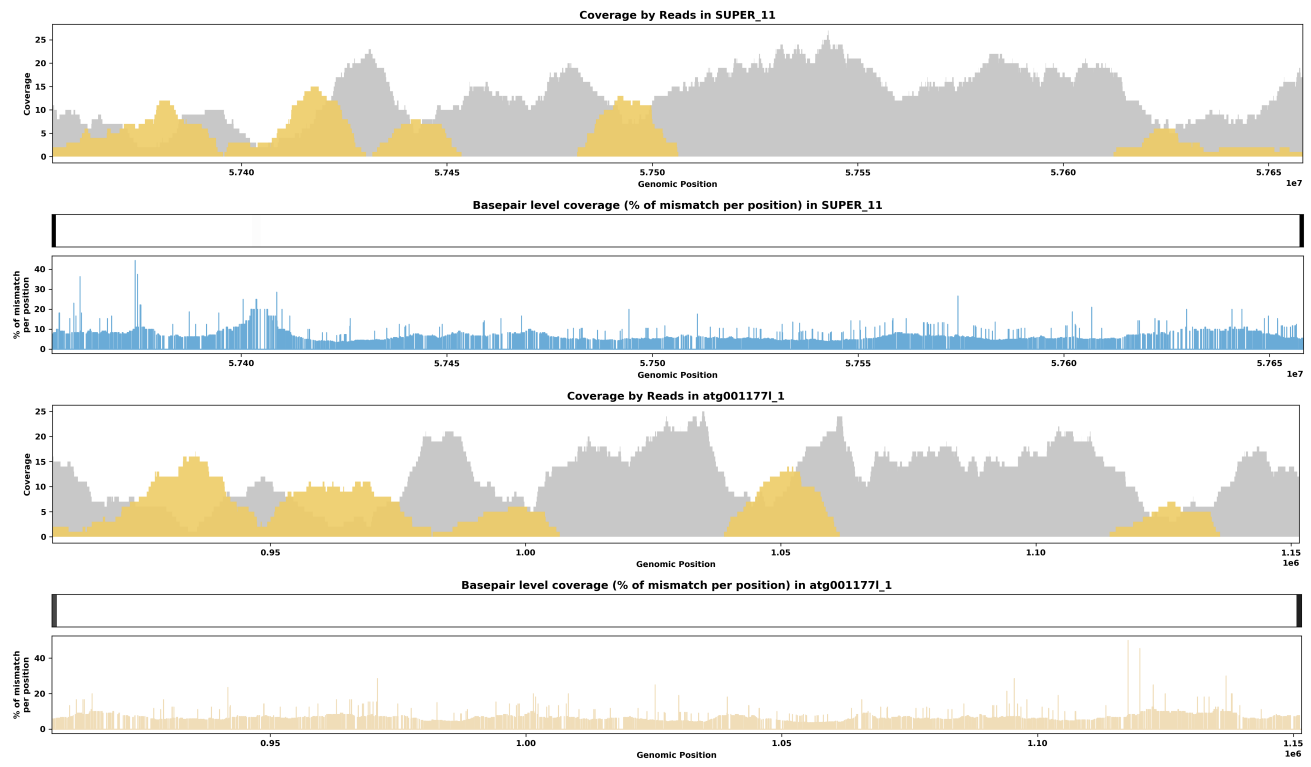

Species ID: mChiNiv1

Common Name: European snow vole

Scientific Name: *Chionomys nivalis*

Assembly Type: Not Haplotype Resolved

Data Source: VGP

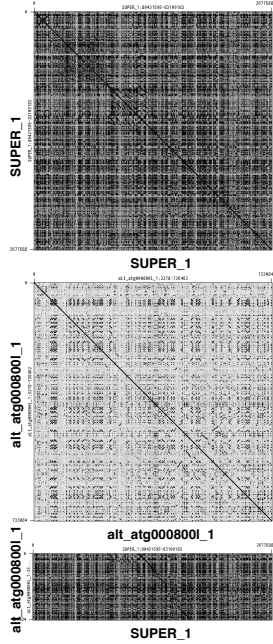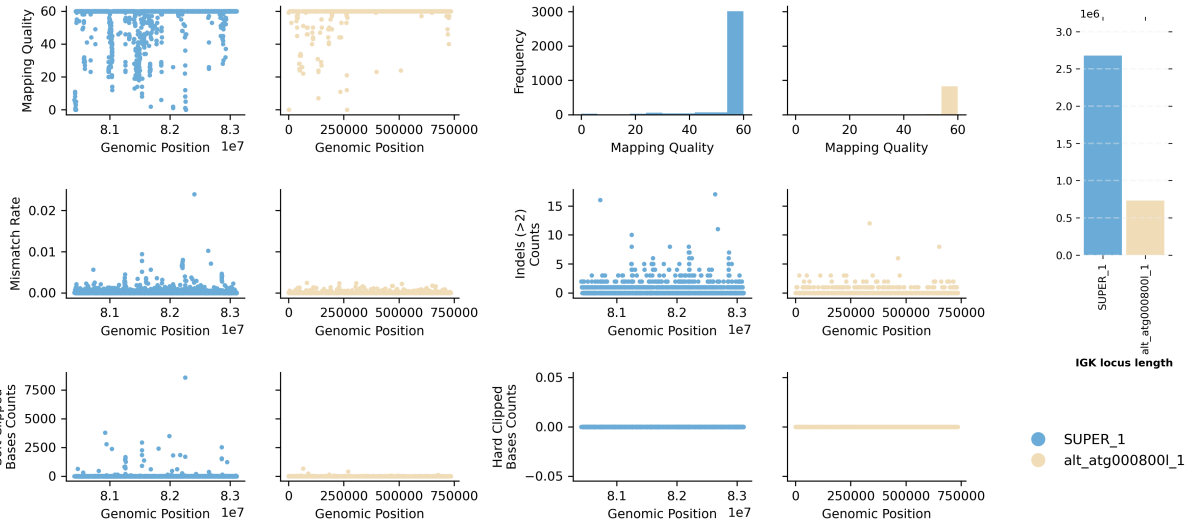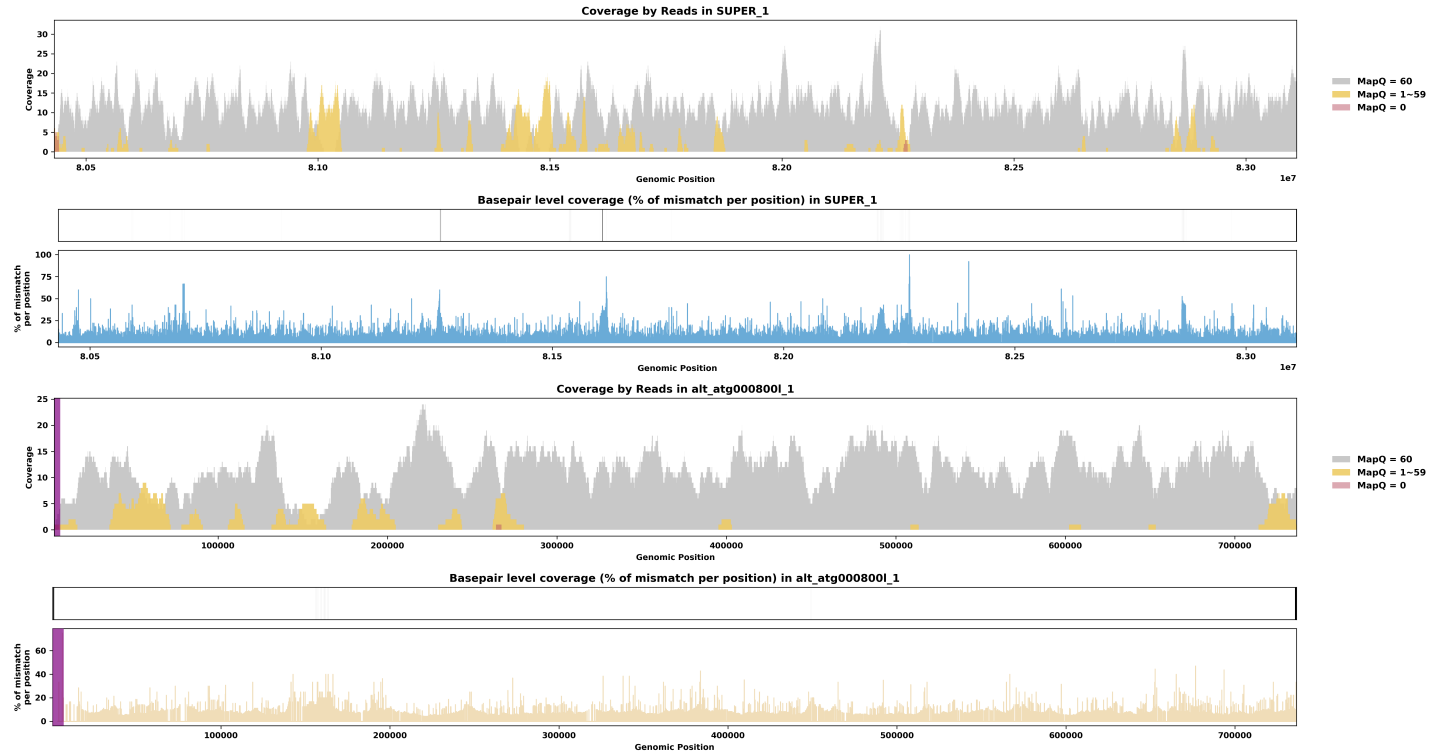



Species ID: mDasNov1  
 Common Name: nine-banded armadillo  
 Scientific Name: Dasypus novemcinctus  
 Assembly Type: Haplotype Resolved  
 Data Source: VGP

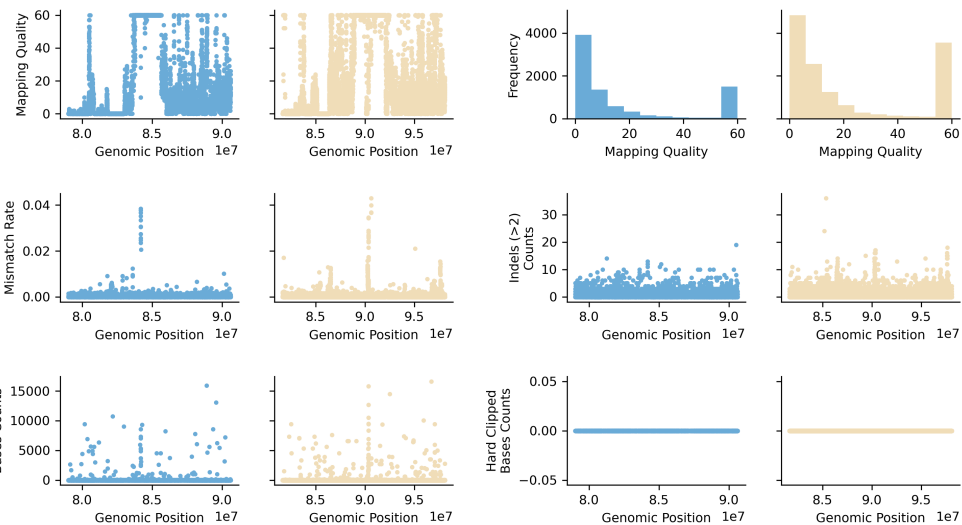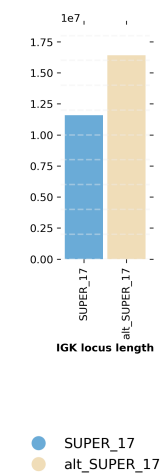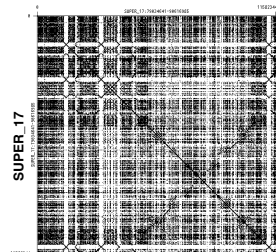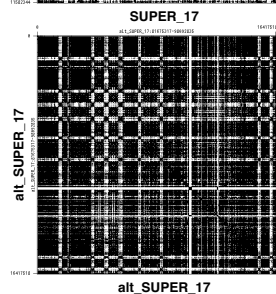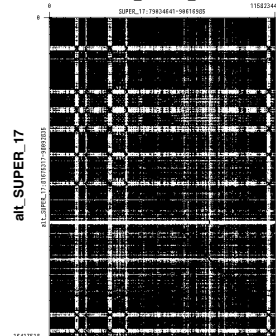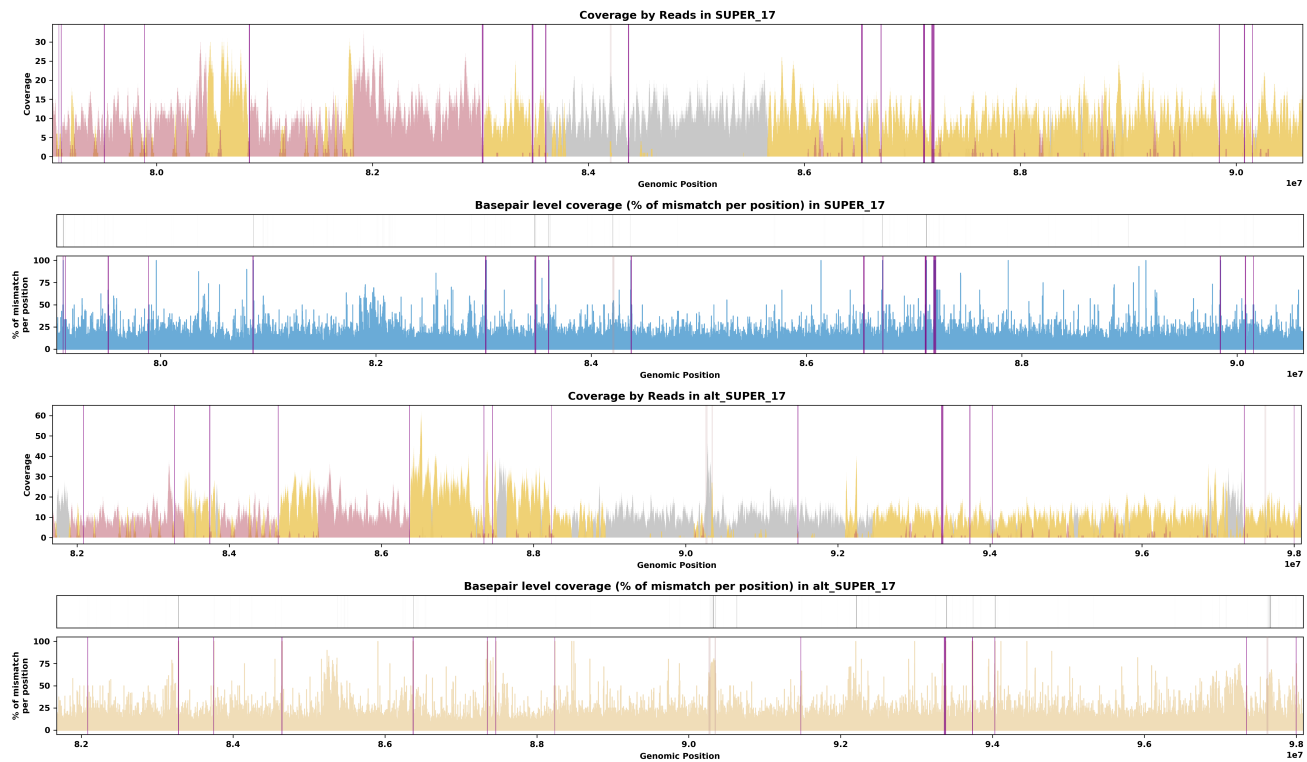

Species ID: mDelDel1

Common Name: saddleback dolphin

Scientific Name: Delphinus delphis

Assembly Type: Not Haplotype Resolved

Data Source: VGP

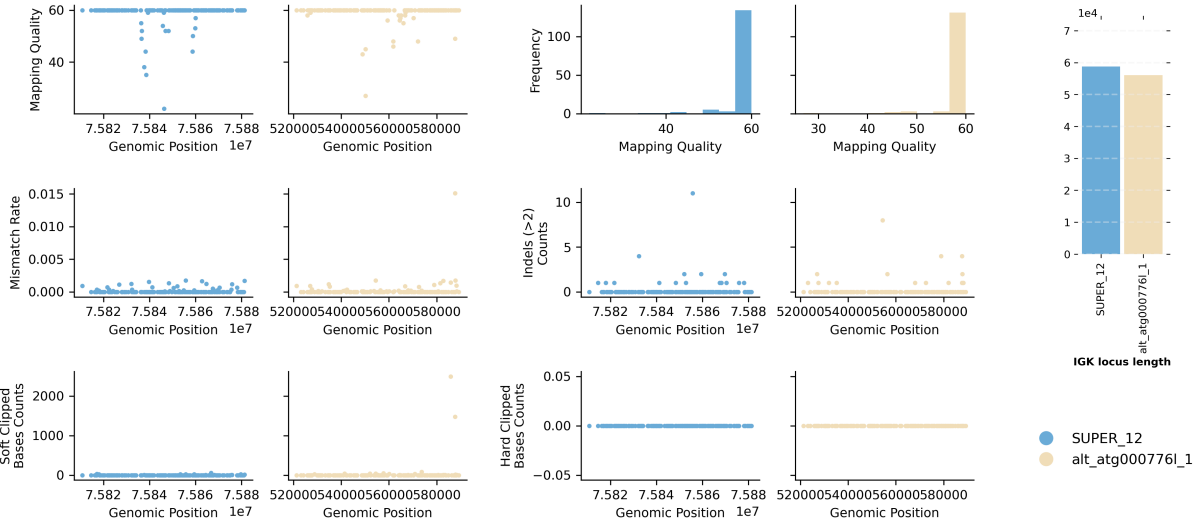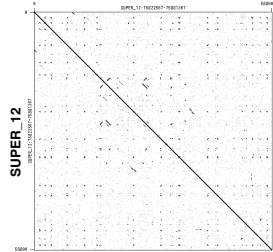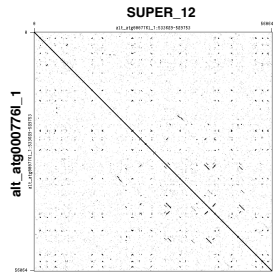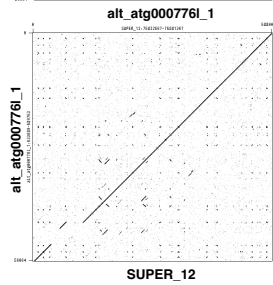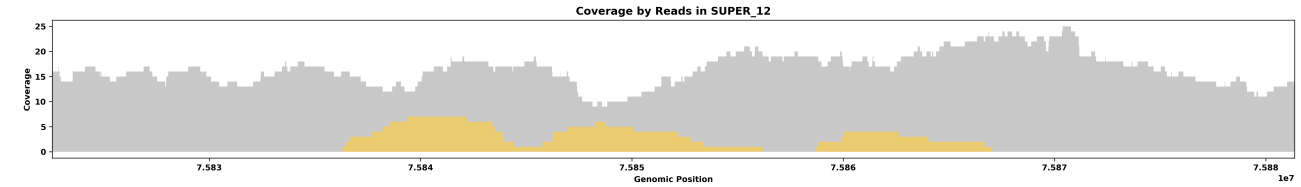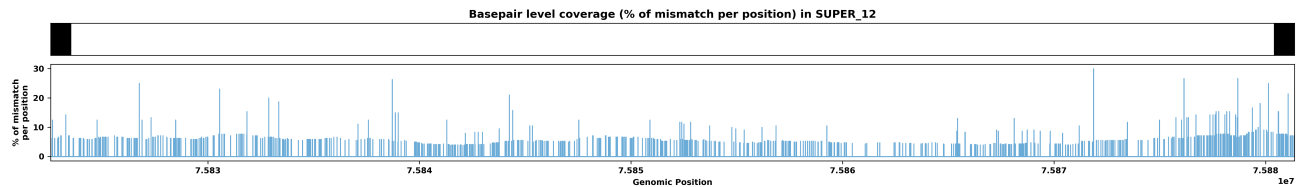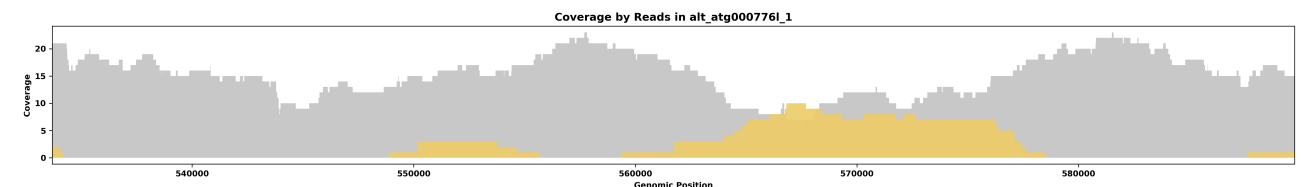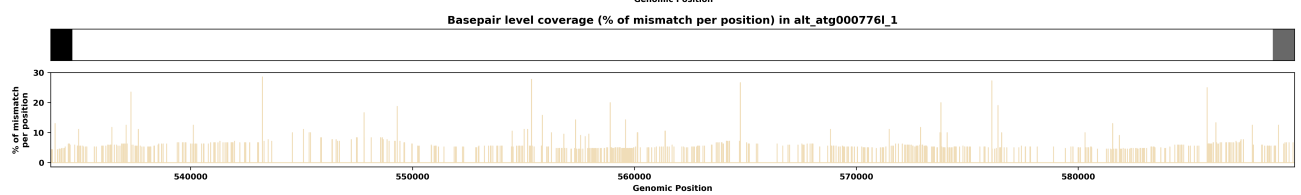

Species ID: mDicBic1  
 Common Name: black rhinoceros  
 Scientific Name: *Diceros bicornis*  
 Assembly Type: Haplotype Resolved  
 Data Source: VGP

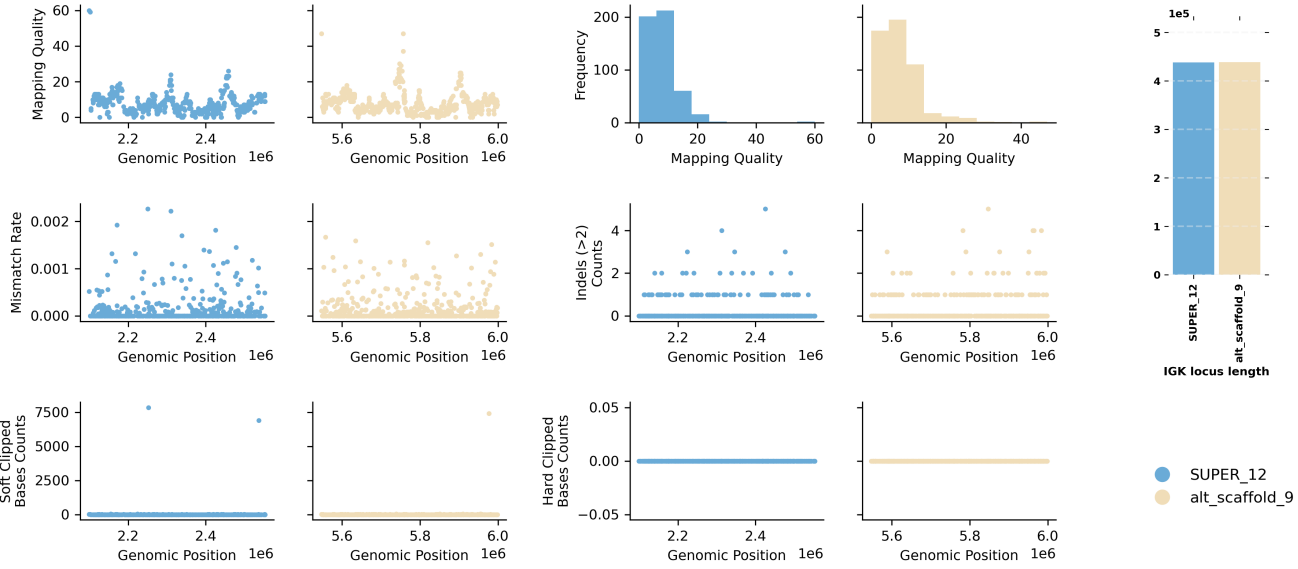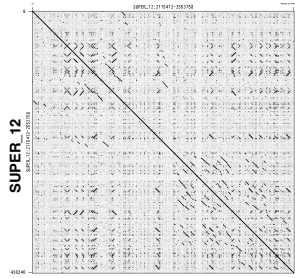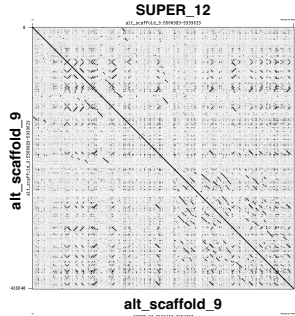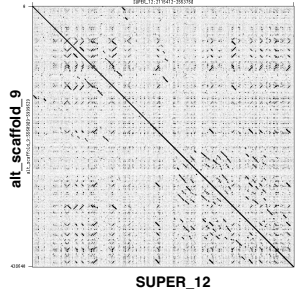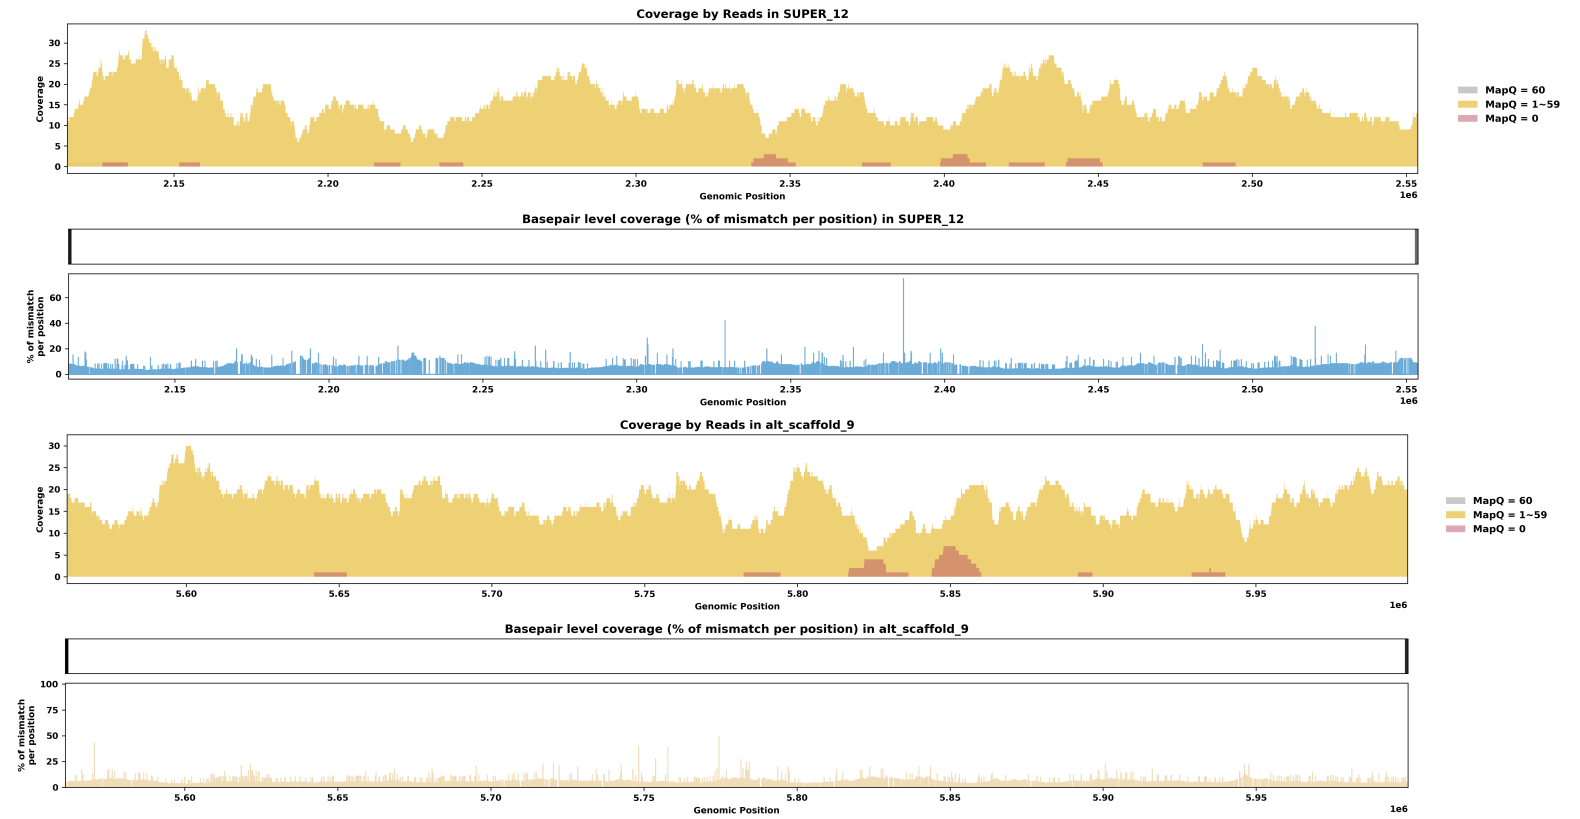

Species ID: mDyMer1  
 Common Name: Meriam Kangaroo Rat  
 Scientific Name: Dipodomys merriami  
 Assembly Type: Not Haplotype Resolved  
 Data Source: CCDF

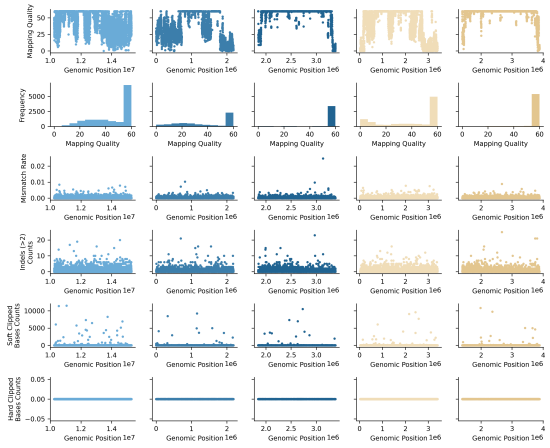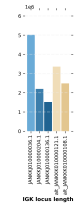

● primary JANKK01000036.1  
 ● primary JANKK01000024.1  
 ● primary JANKK01000136.1  
 ● alternate alt\_JANXXX01000121.1  
 ● alternate alt\_JANXXX0000108.1

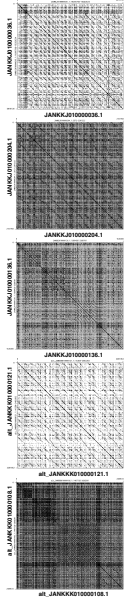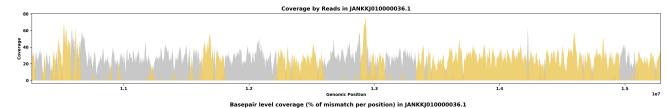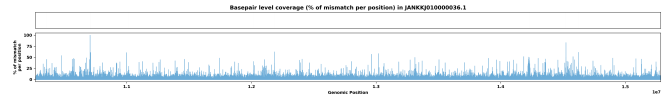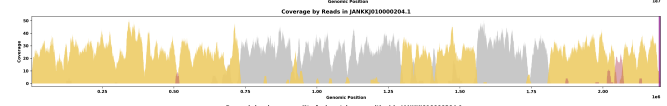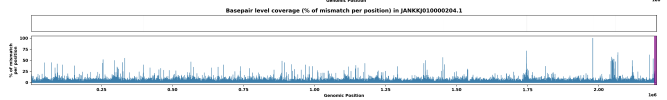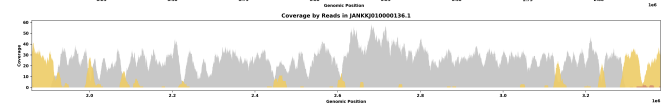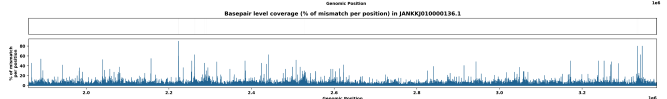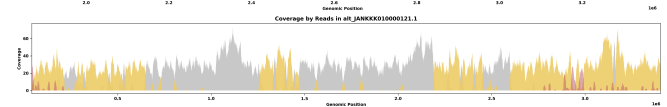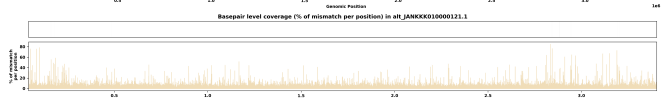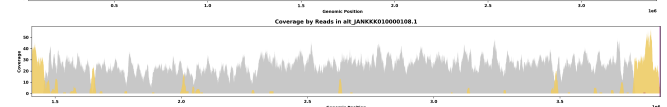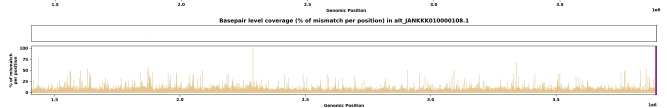

Species ID: mEleMax1  
 Common Name: Asiatic Elephant  
 Scientific Name: *Elephas maximus*  
 Assembly Type: Not Haplotype Resolved  
 Data Source: VGP

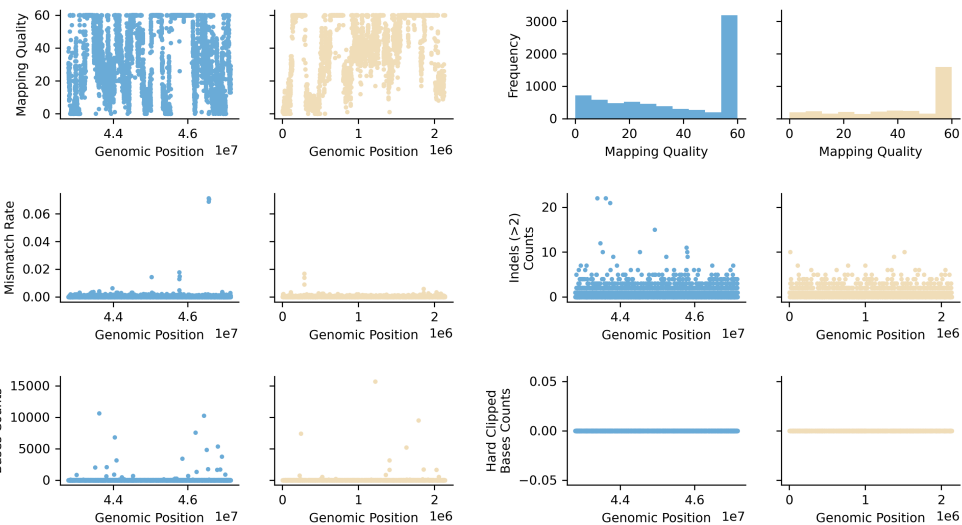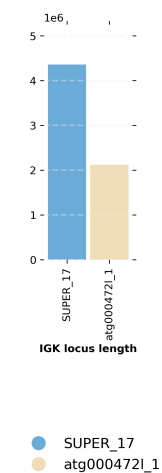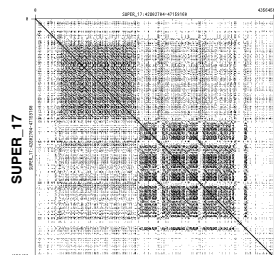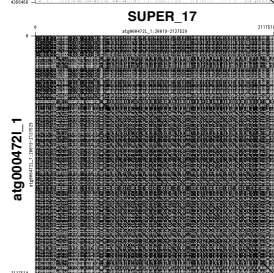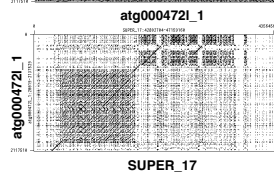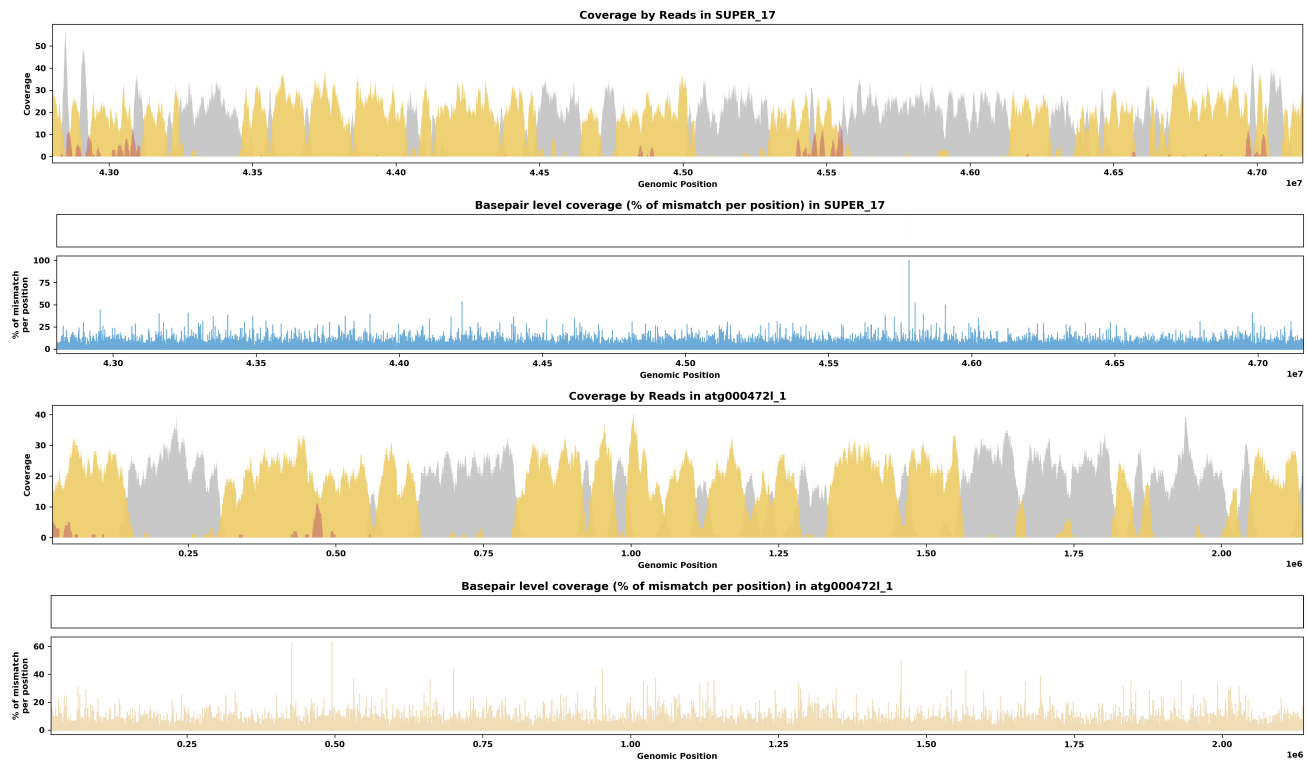

Species ID: mEriEur2

Common Name: western European hedgehog

Scientific Name: Erinaceus europaeus

Assembly Type: Not Haplotype Resolved

Data Source: VGP

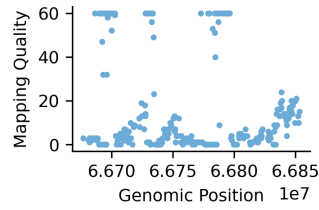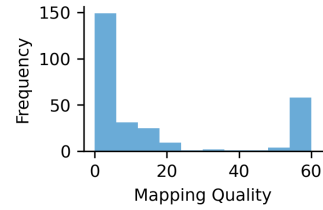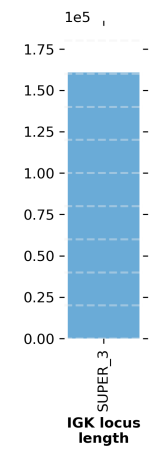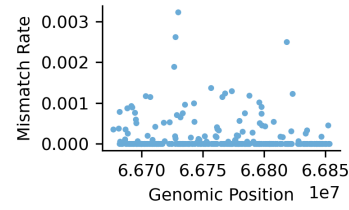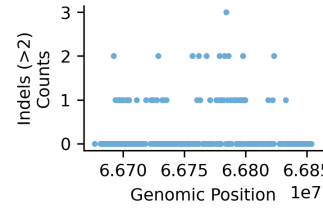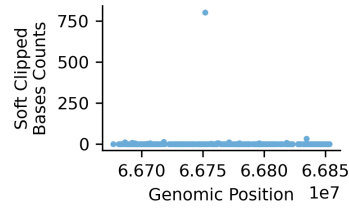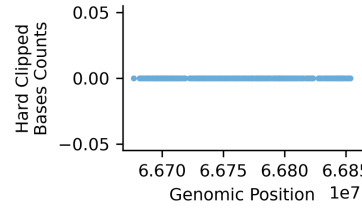

● SUPER\_3

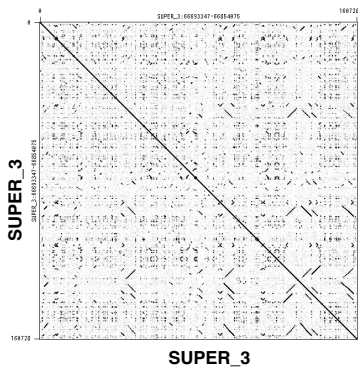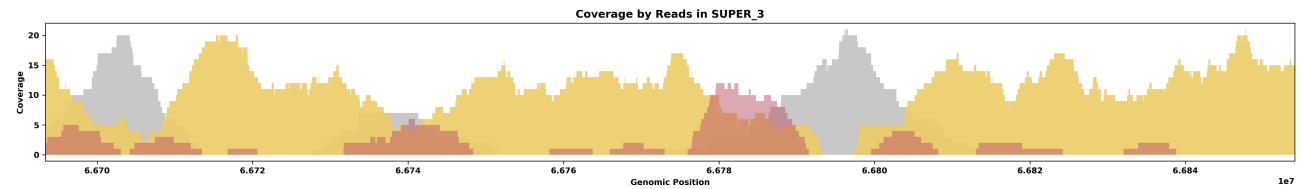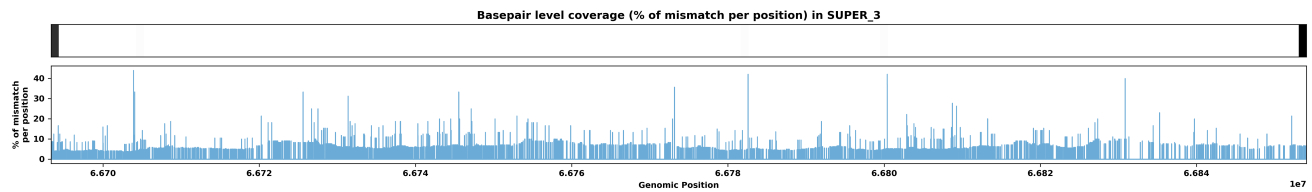

Species ID: mEscRob2  
 Common Name: grey whale  
 Scientific Name: *Eschrichtius robustus*  
 Assembly Type: Not Haplotype Resolved  
 Data Source: VGP

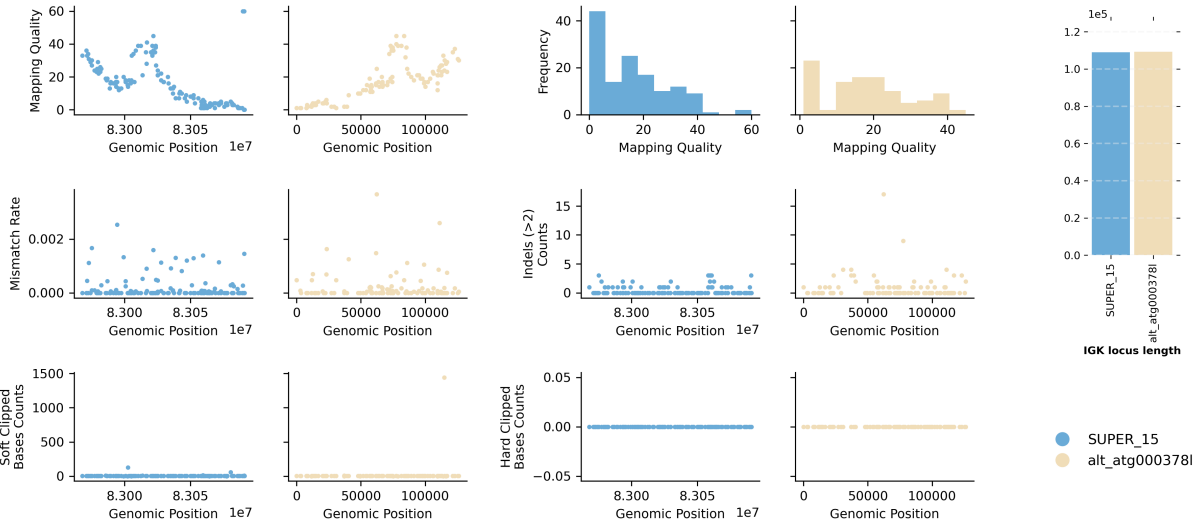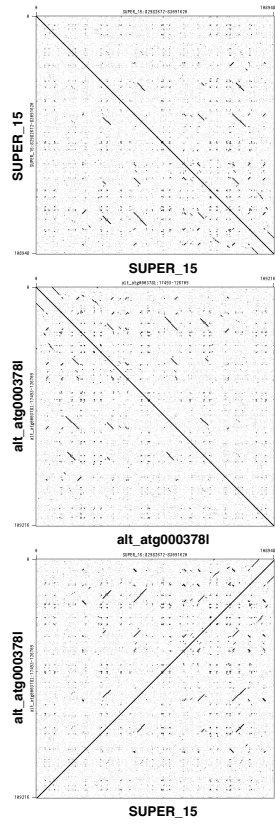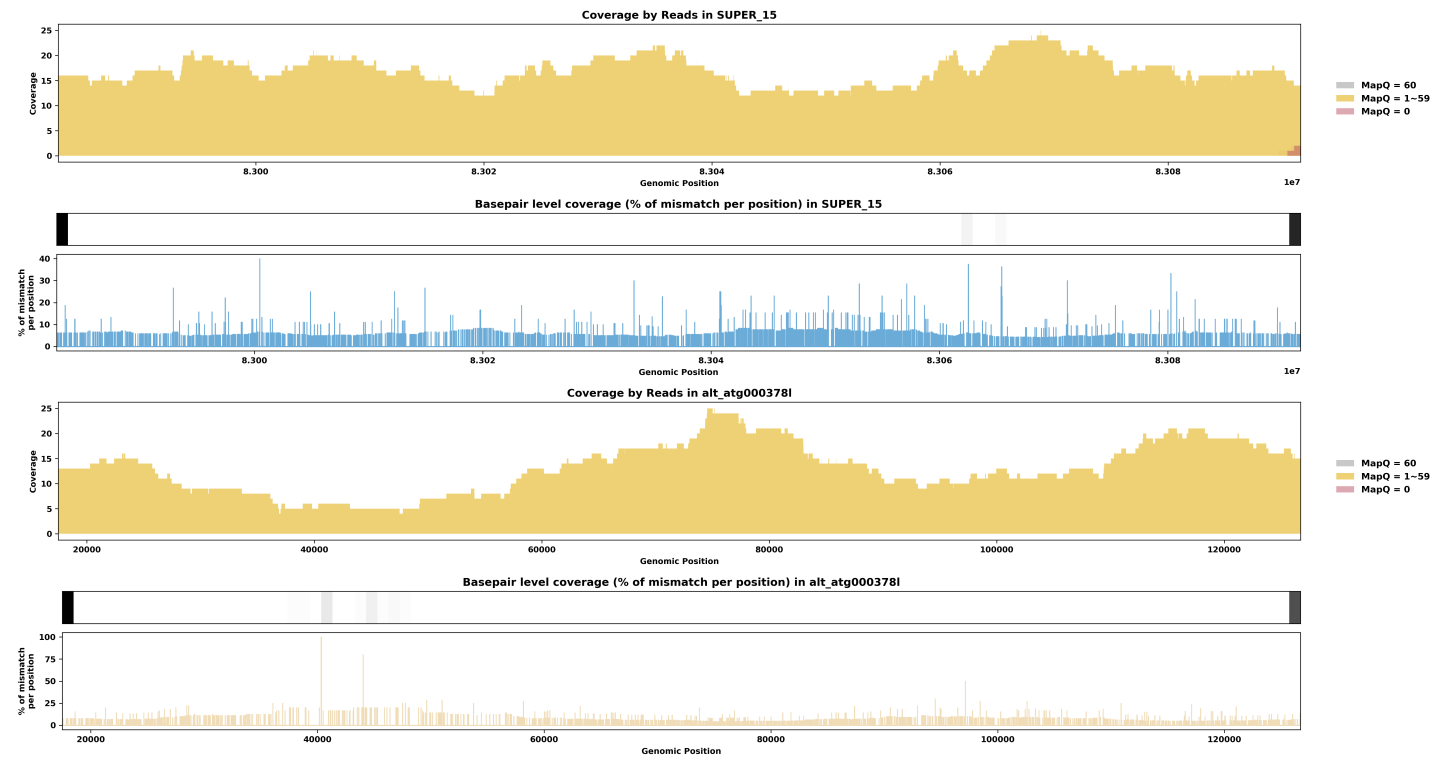

Species ID: mEubGla1

Common Name: North Atlantic right whale

Scientific Name: Eubalaena glacialis

Assembly Type: Haplotype Resolved

Data Source: VGP

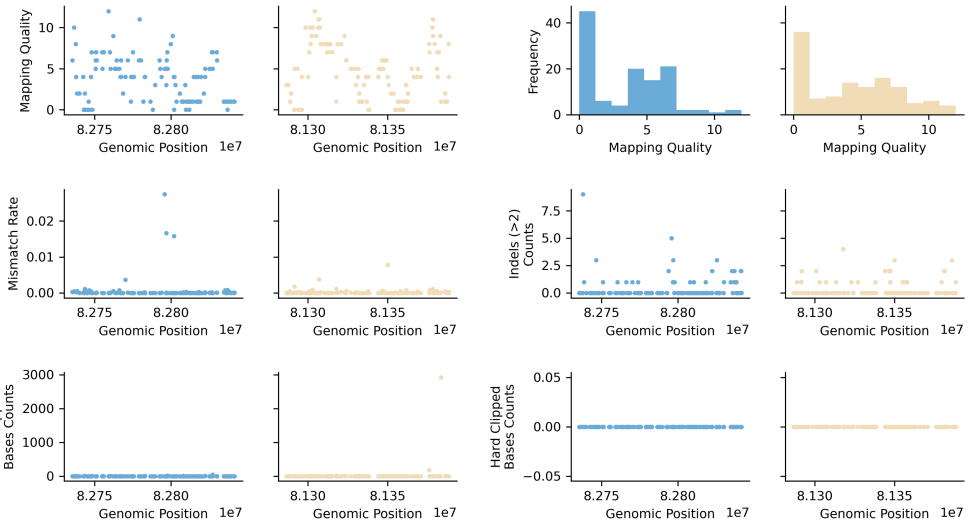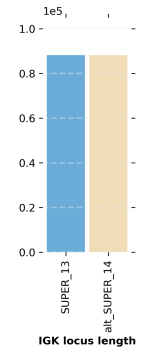

● SUPER\_13  
● alt\_SUPER\_14

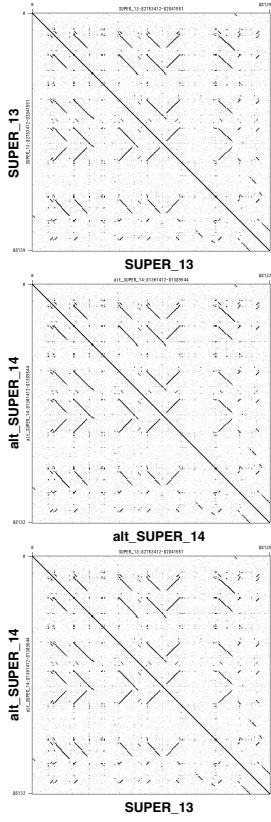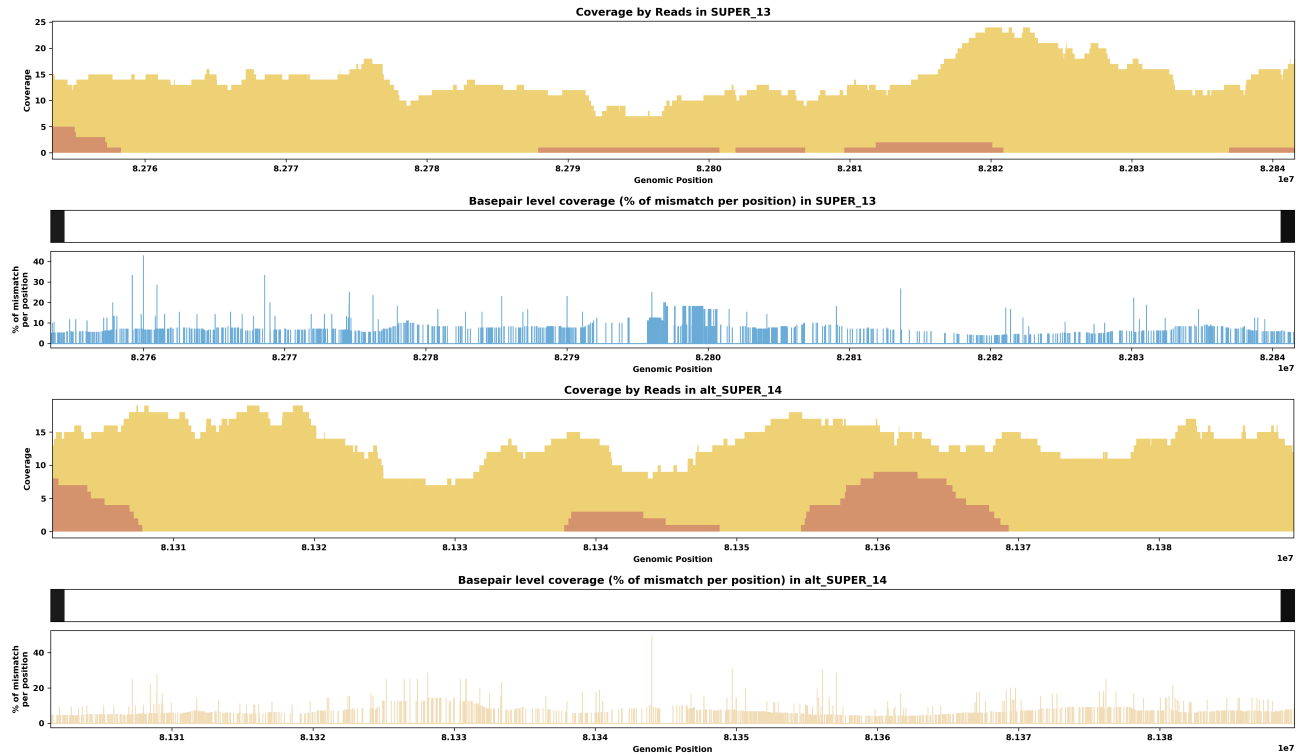



Species ID: mGloMel1

Common Name: long-finned pilot whale

Scientific Name: Globicephala melas

Assembly Type: Not Haplotype Resolved

Data Source: VGP

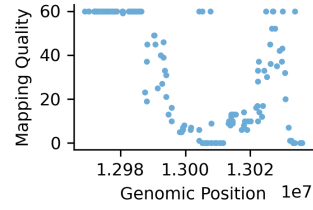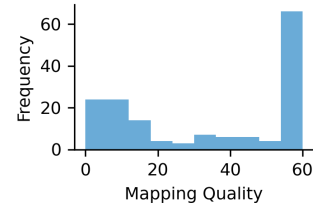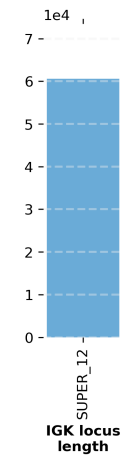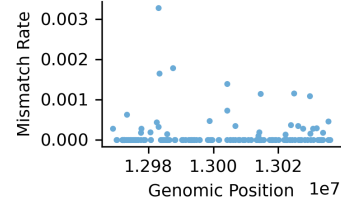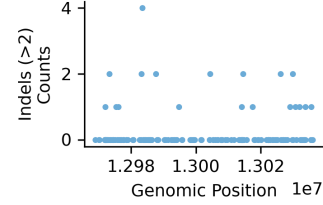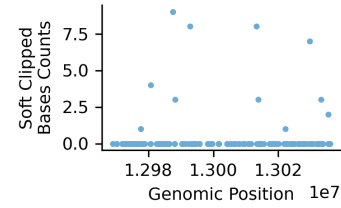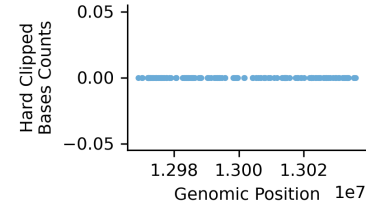

● SUPER\_12

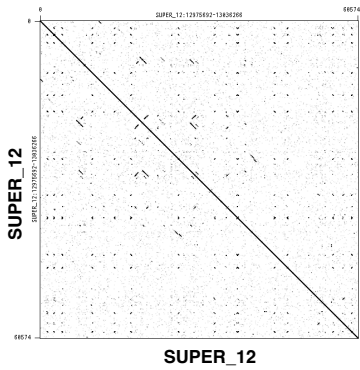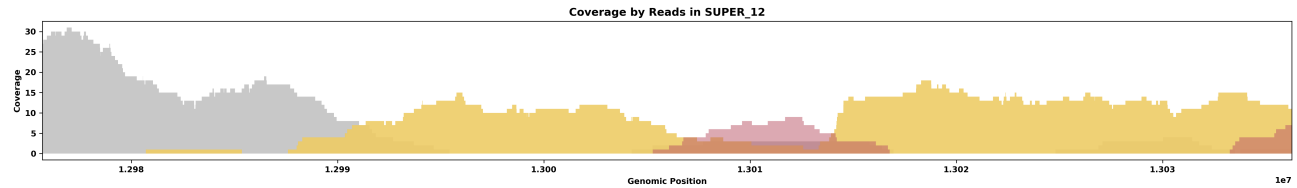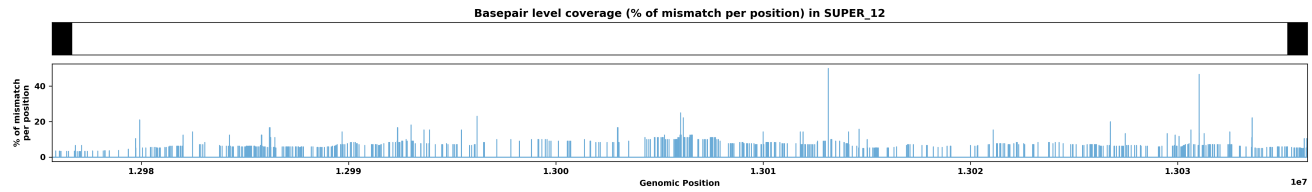

Species ID: mGorGor1

Common Name: Gorilla

Scientific Name: Gorilla\_gorilla

Assembly Type: Haplotype Resolved

Data Source: T2T Primate

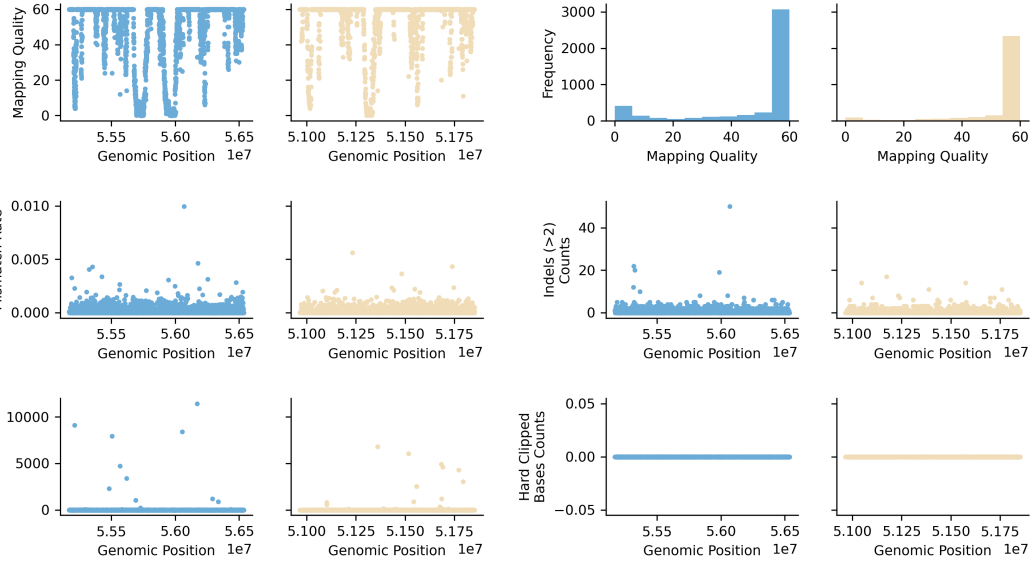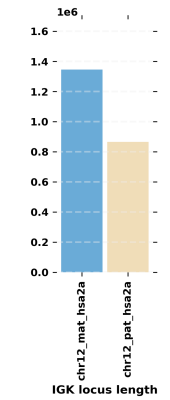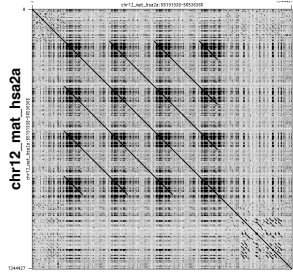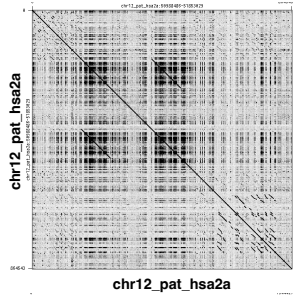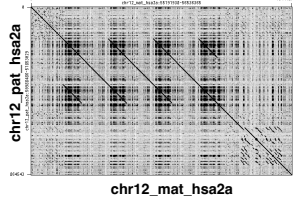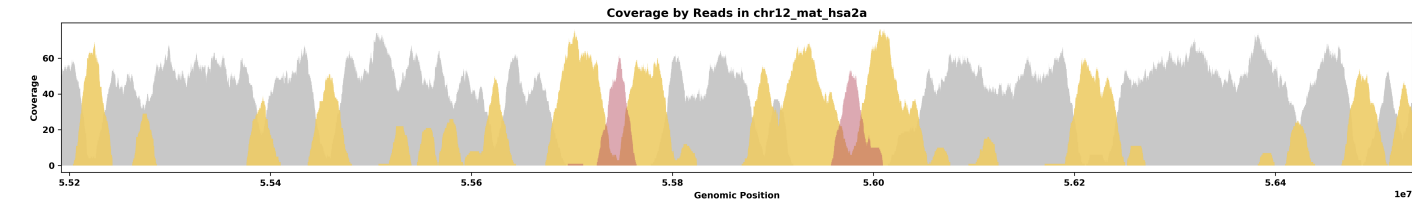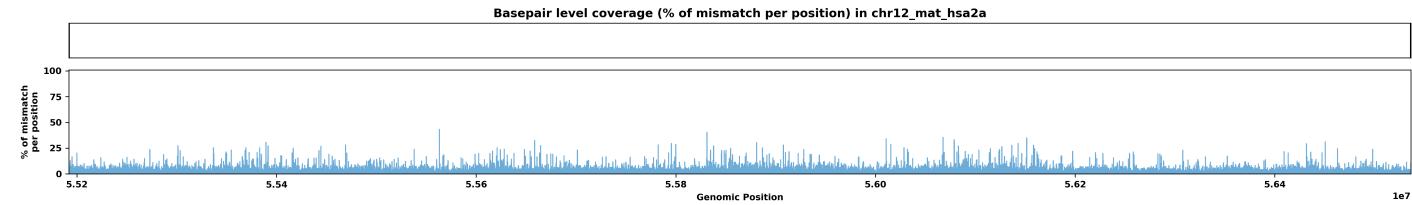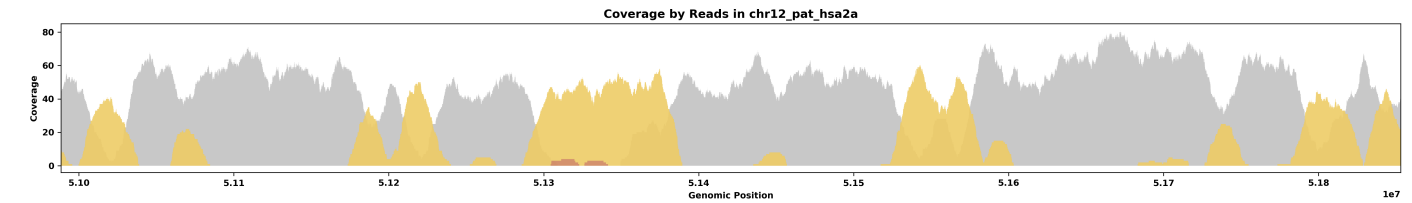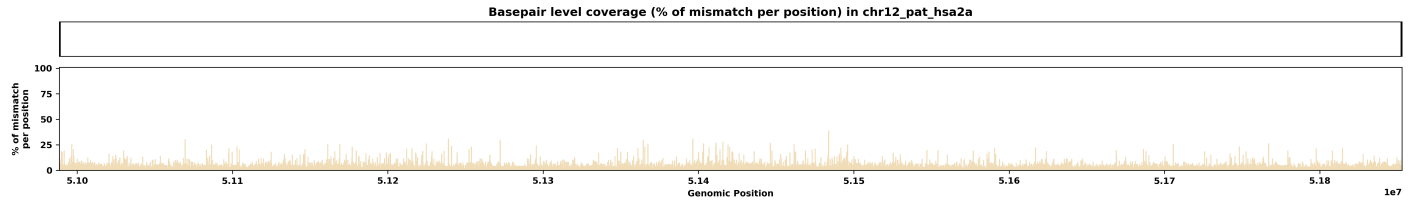

Species ID: mHetBru1

Common Name: Yellow-spotted hyrax

Scientific Name: Heterohyrax brucei

Assembly Type: Not Haplotype Resolved

Data Source: VGP

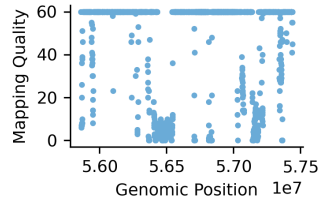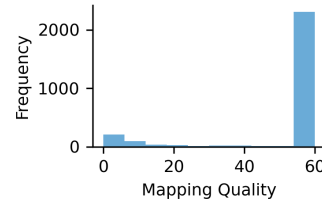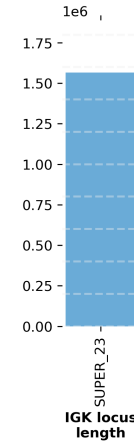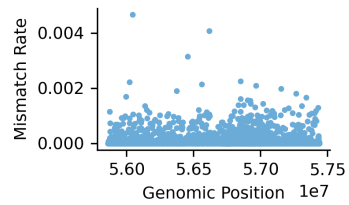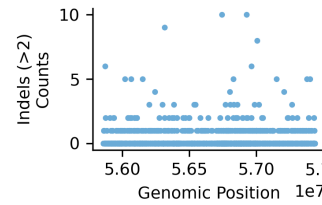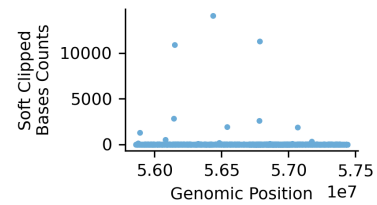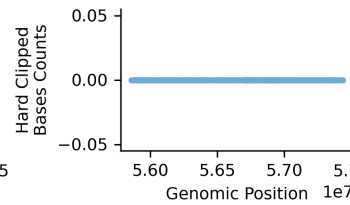

● SUPER\_23

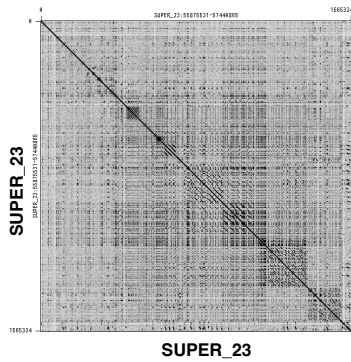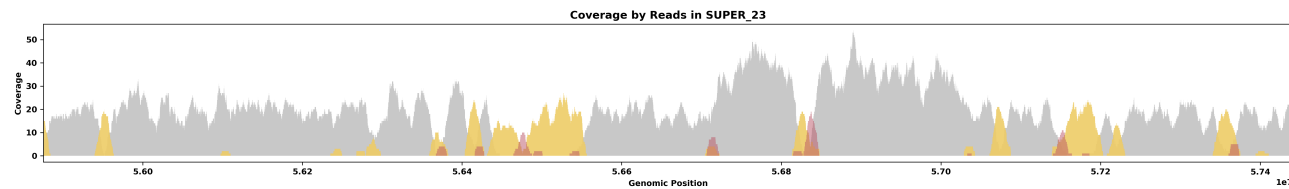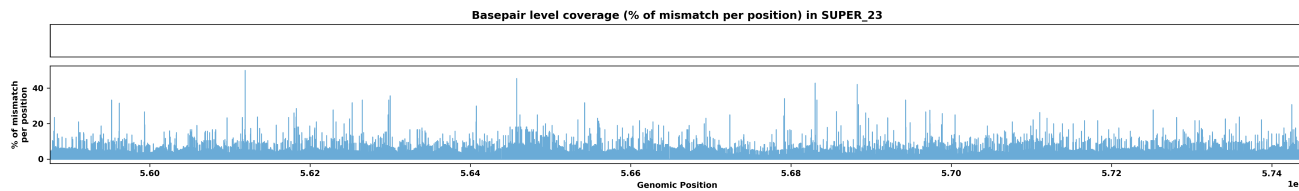

Species ID: mHipAmp2  
 Common Name: hippopotamus  
 Scientific Name: Hippopotamus amphibius kiboko  
 Assembly Type: Haplotype Resolved  
 Data Source: VGP

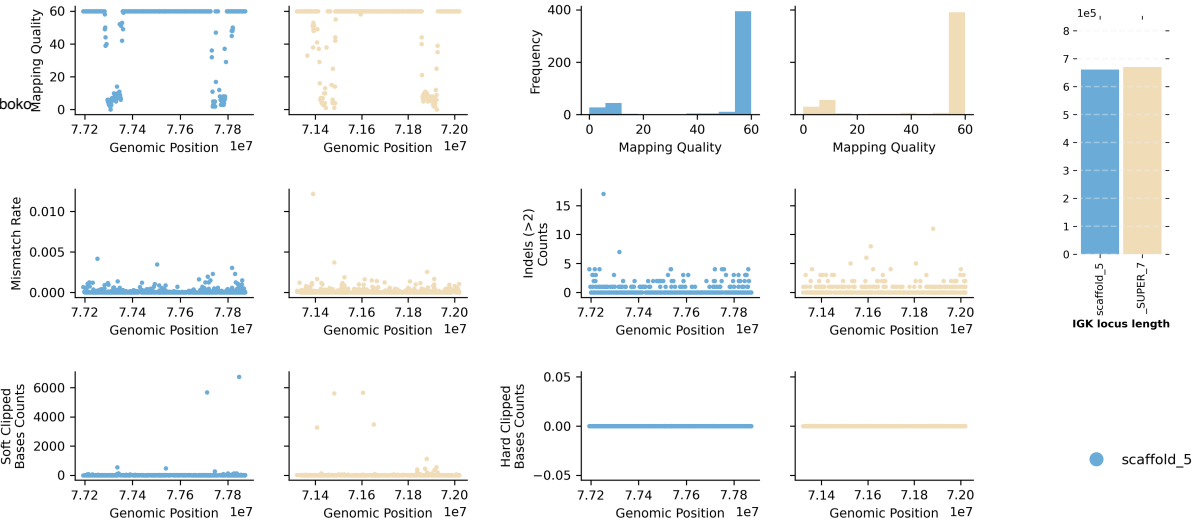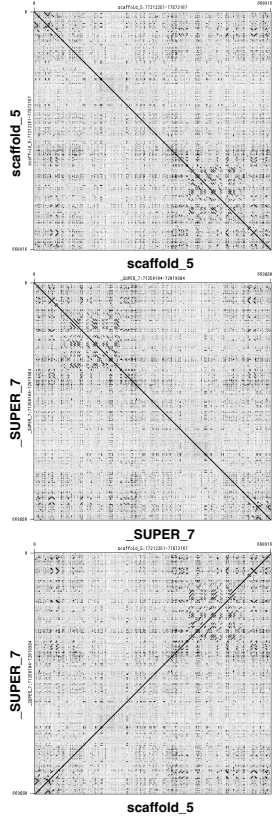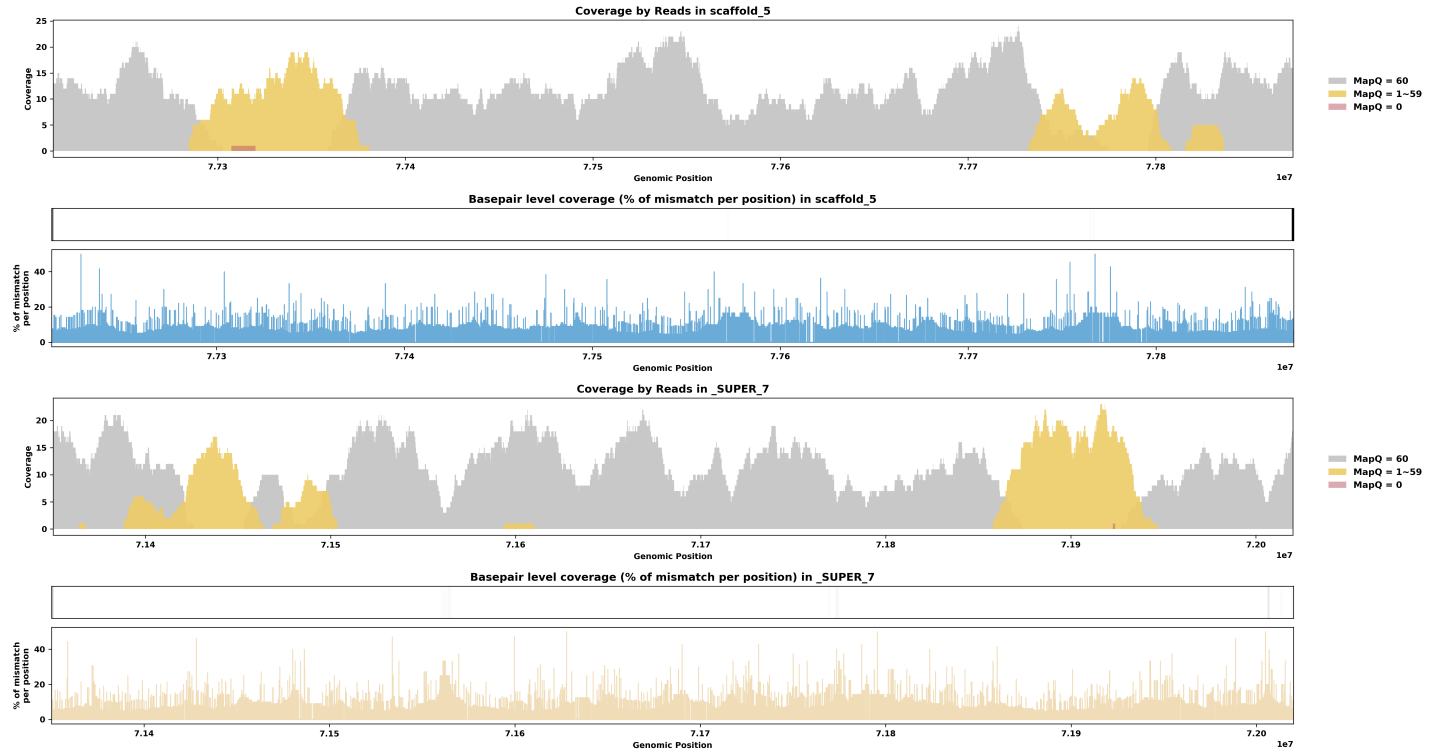

Species ID: mHypAmp2  
 Common Name: northern bottlenose whale  
 Scientific Name: *Hyperoodon ampullatus*  
 Assembly Type: Not Haplotype Resolved  
 Data Source: VGP

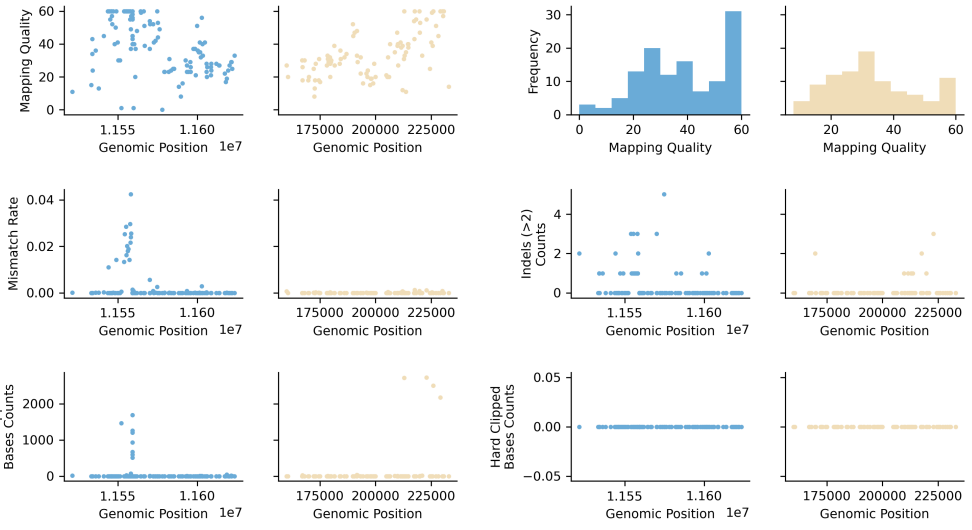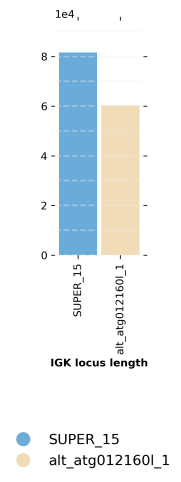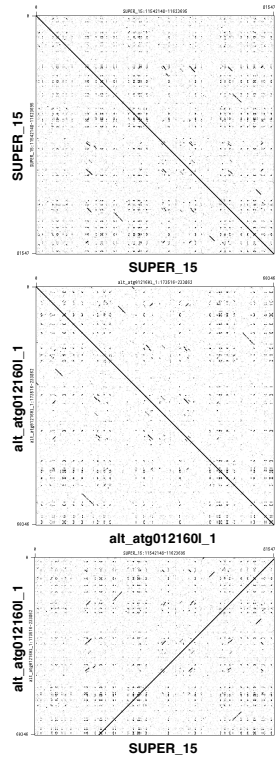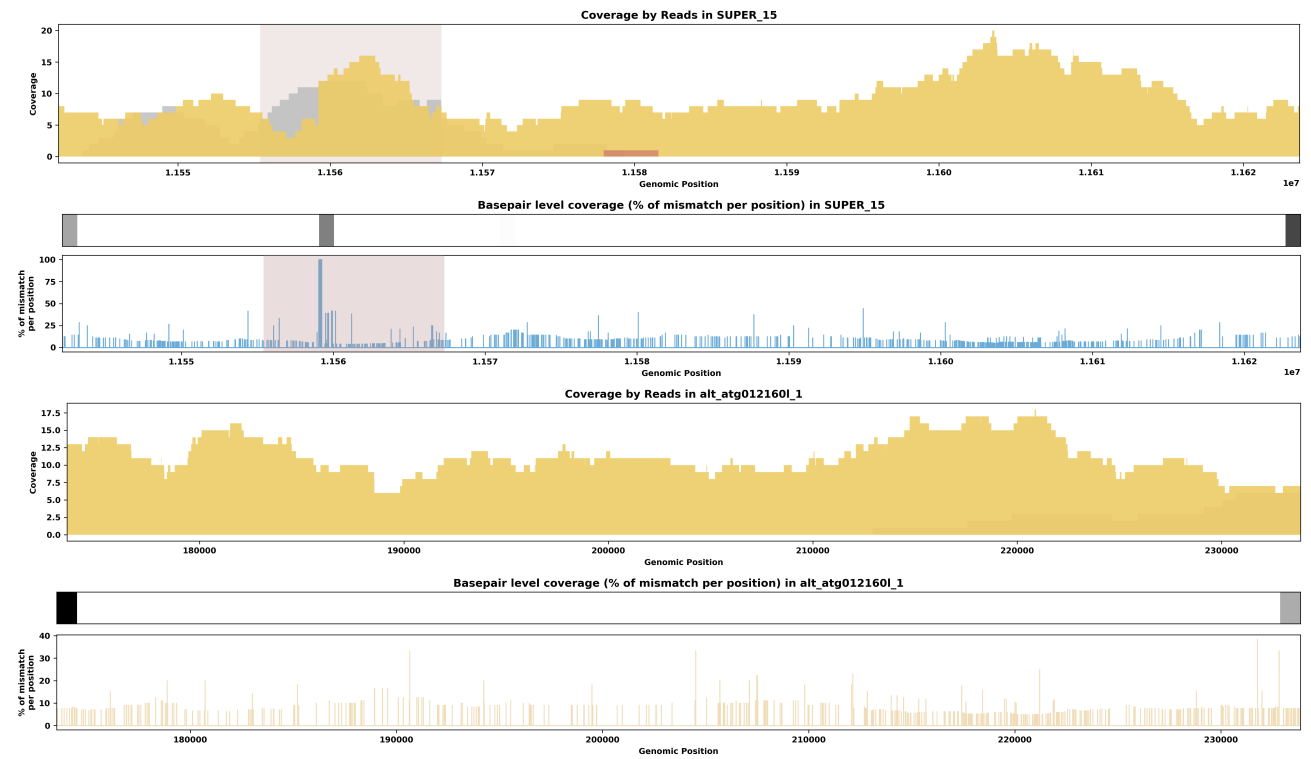

MapQ = 60  
 MapQ = 1-59  
 MapQ = 0

Species ID: mLagAlb1  
 Common Name: white-beaked dolphin  
 Scientific Name: Lagenorhynchus albirostris  
 Assembly Type: Not Haplotype Resolved  
 Data Source: VGP

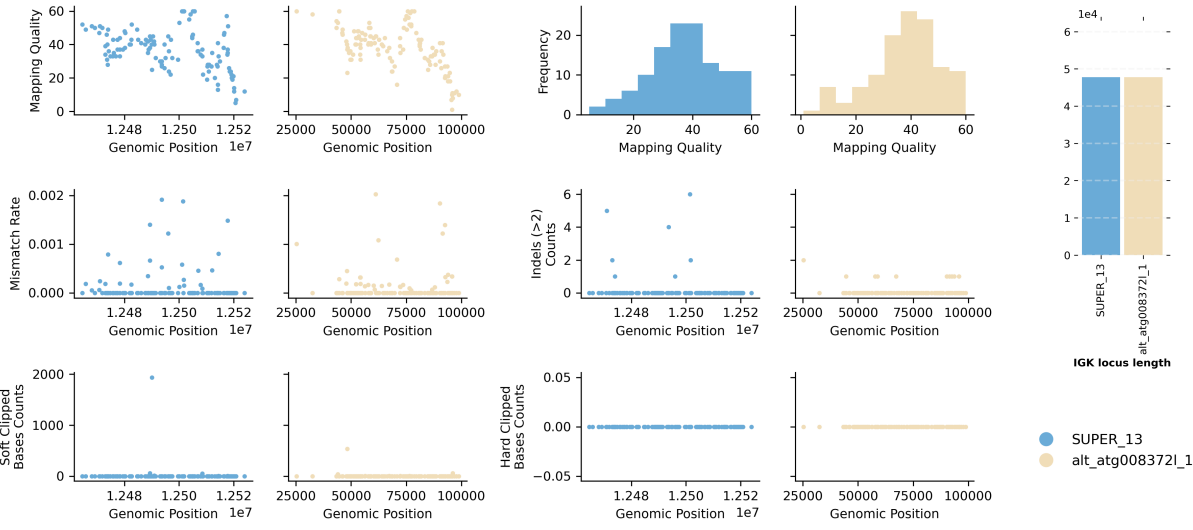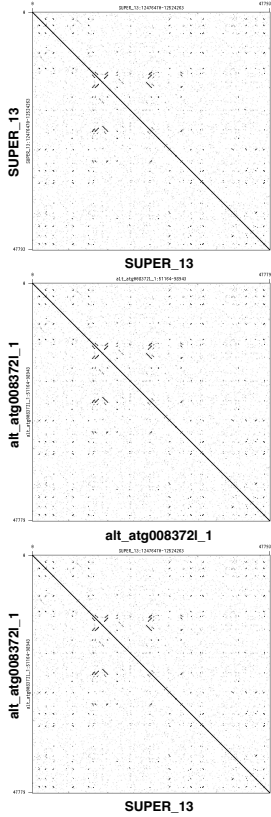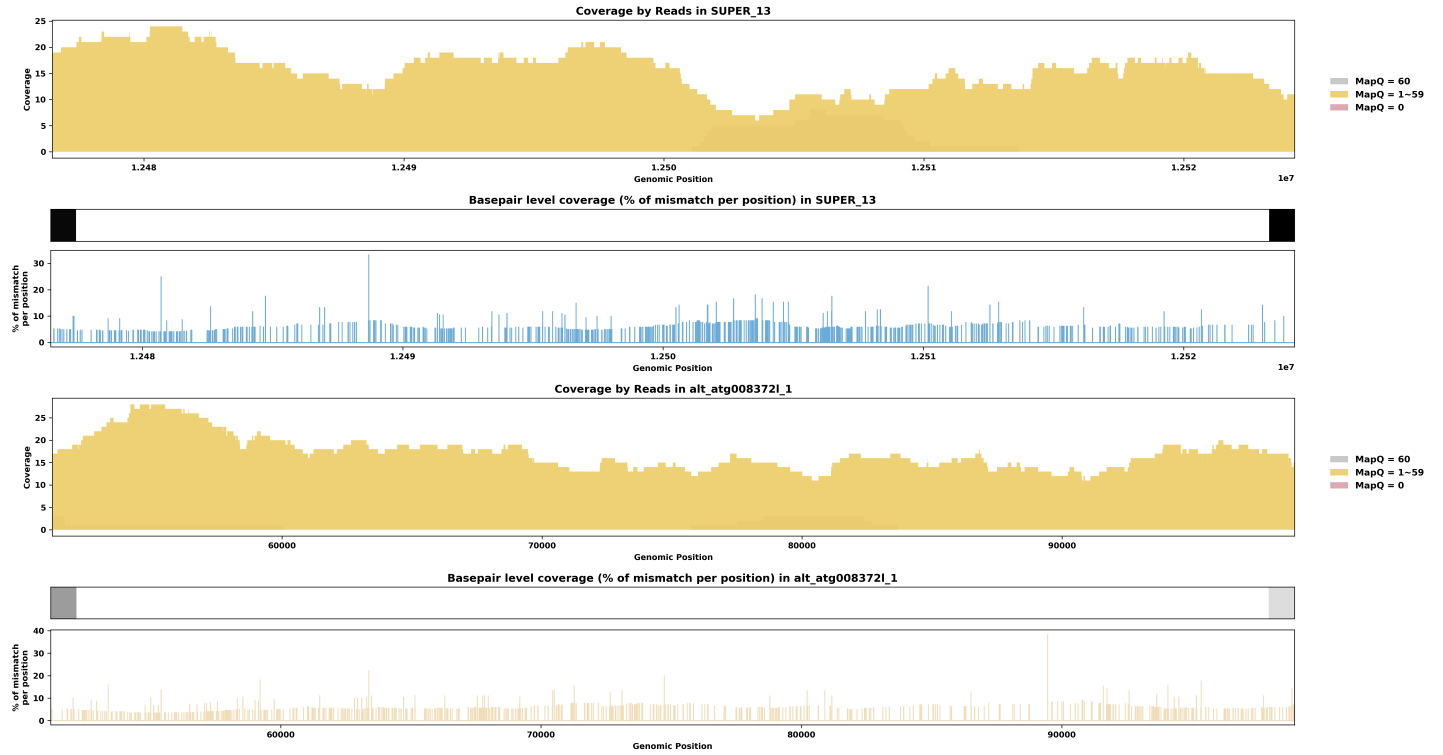

Species ID: mLemCat1  
 Common Name: Ring-tailed lemur  
 Scientific Name: Lemur catta  
 Assembly Type: Not Haplotype Resolved  
 Data Source: VGP

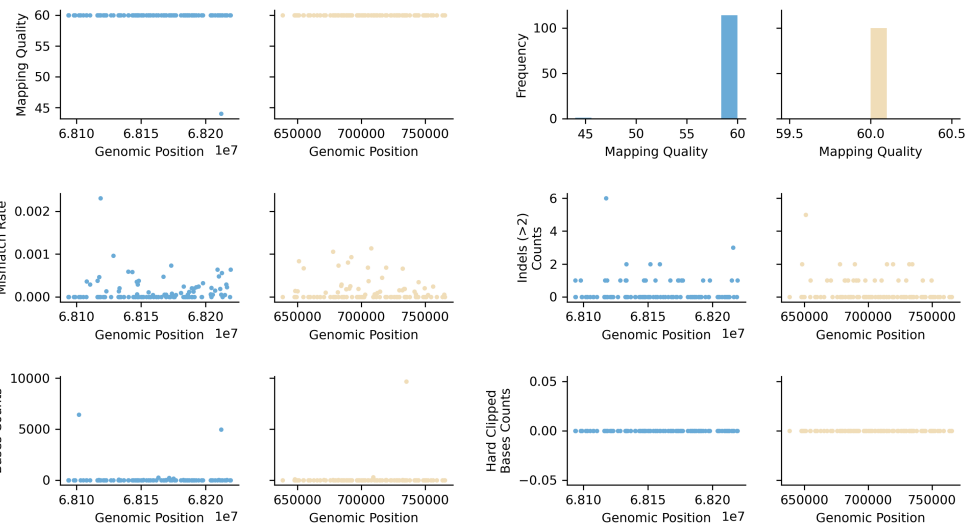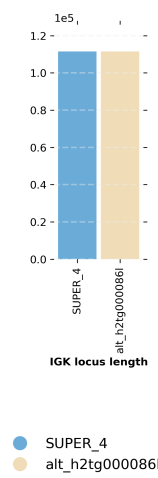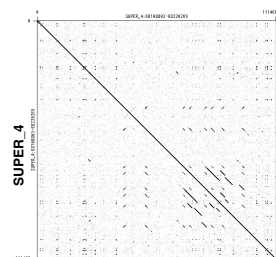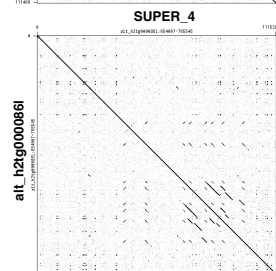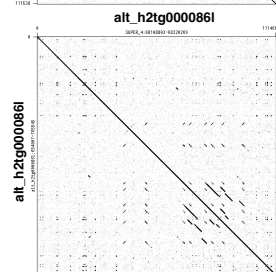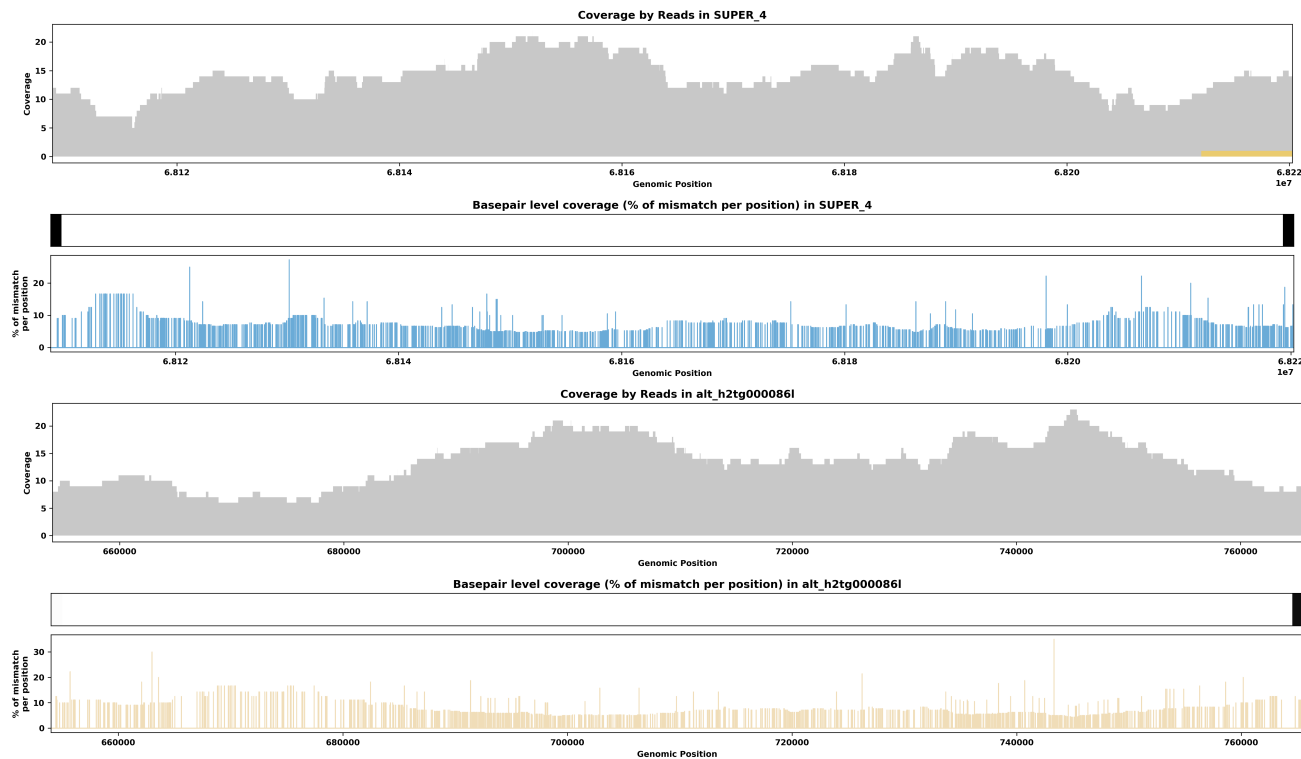

Species ID: mLynRuf1  
 Common Name: Bobcat  
 Scientific Name: Lynx rufus  
 Assembly Type: Not Haplotype Resolved  
 Data Source: CCGP

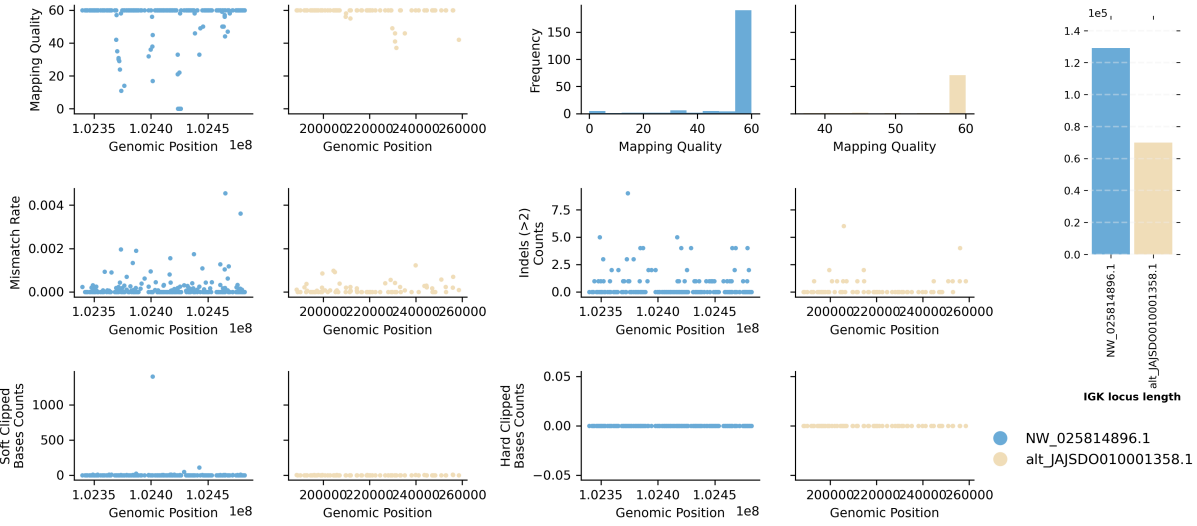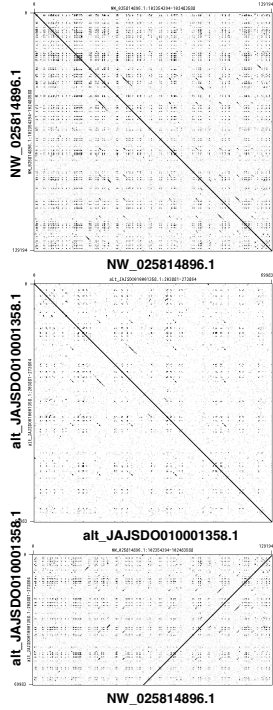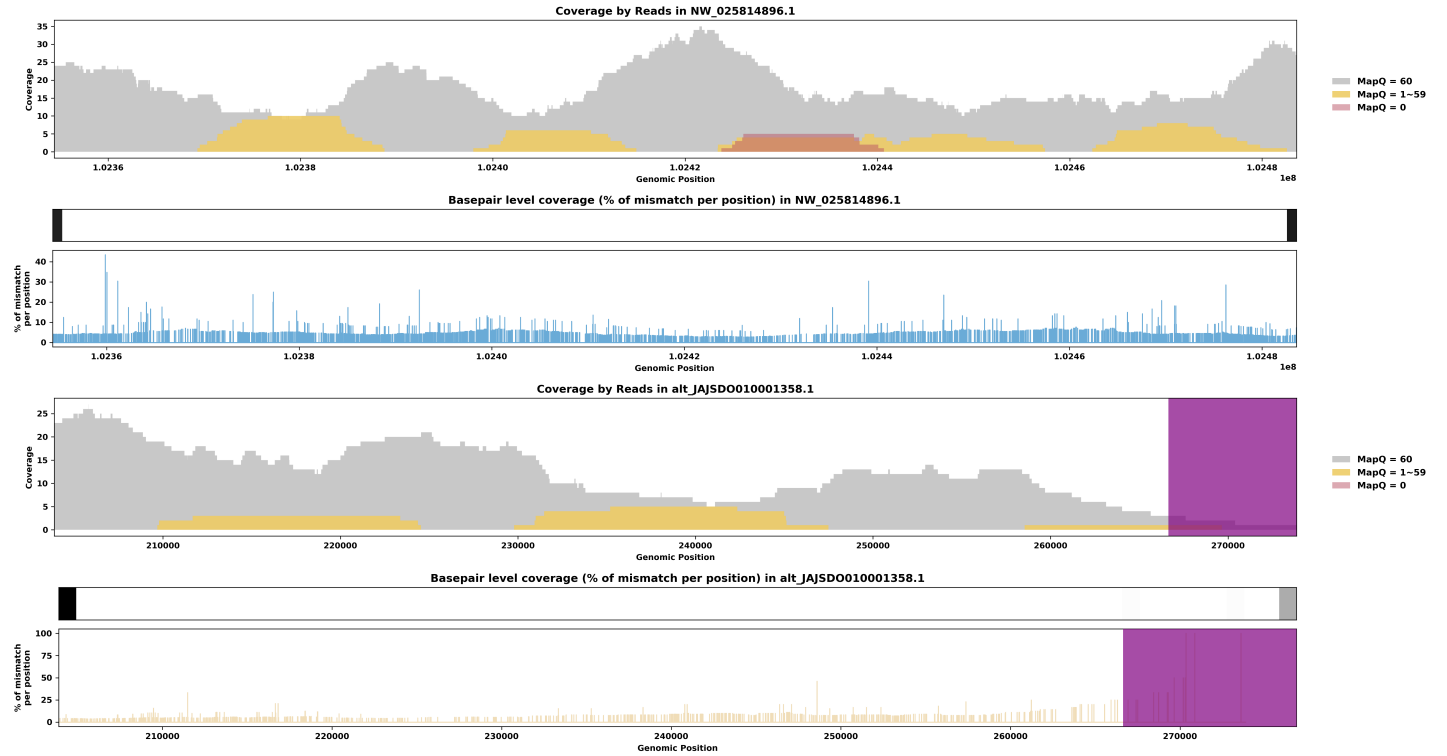



Species ID: mMacEug1

Common Name: tammar wallaby

Scientific Name: Macropus eugenii

Assembly Type: Not Haplotype Resolved

Data Source: VGP

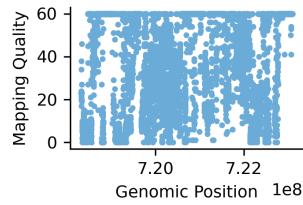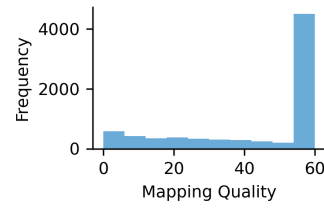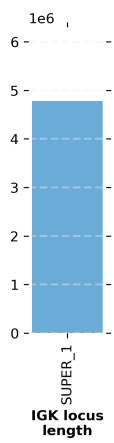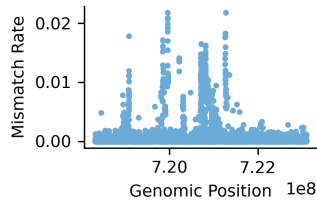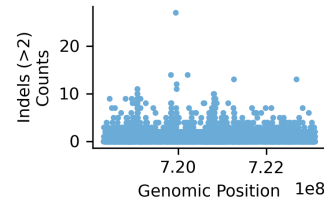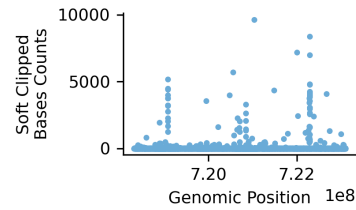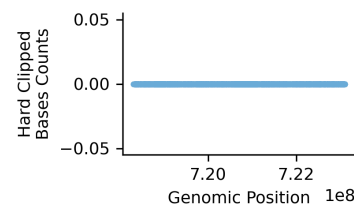

● SUPER\_1

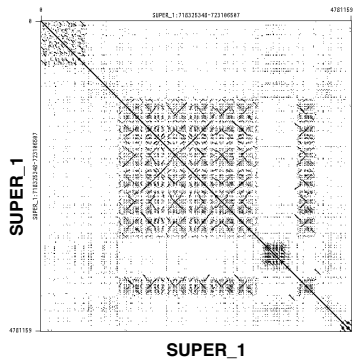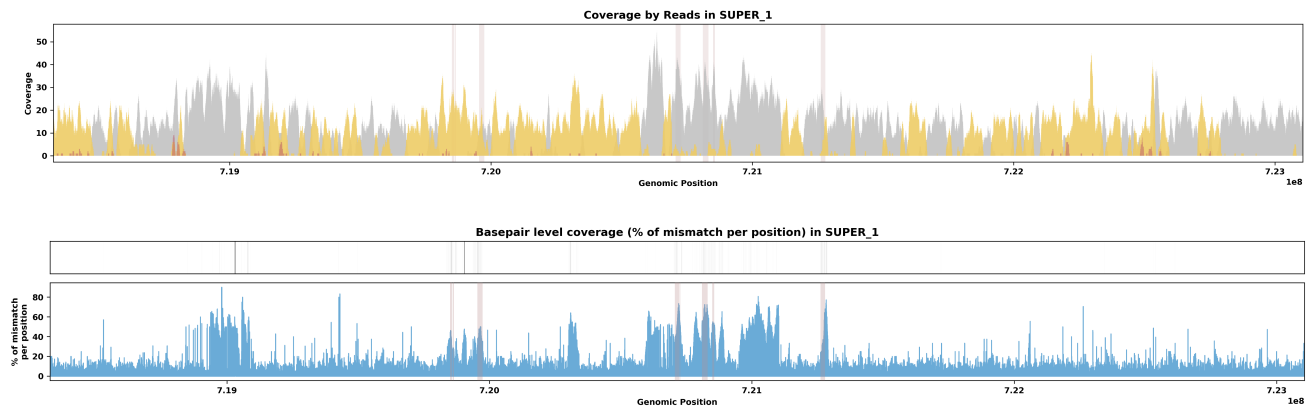

Species ID: mManPen7

Common Name: Chinese pangolin

Scientific Name: *Manis pentadactyla*

Assembly Type: Haplotype Resolved

Data Source: VGP

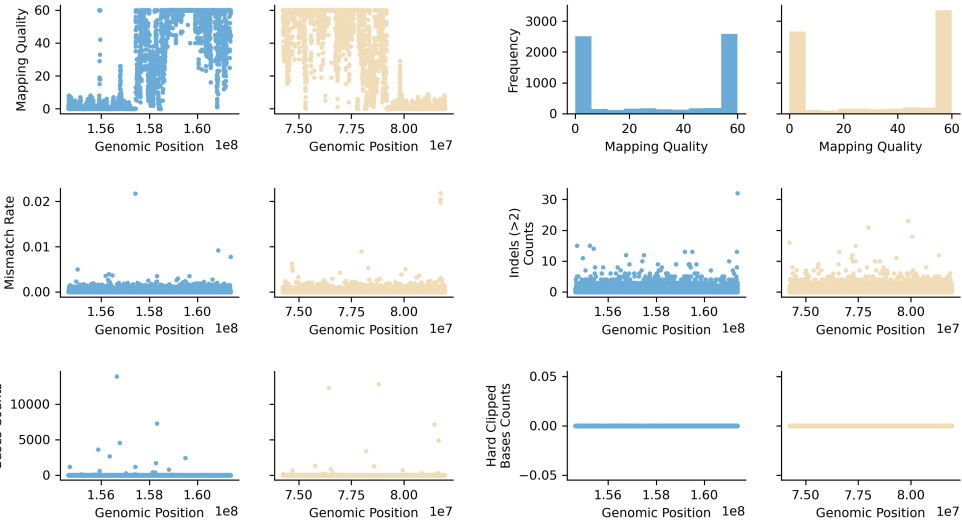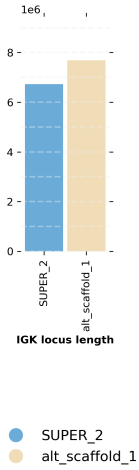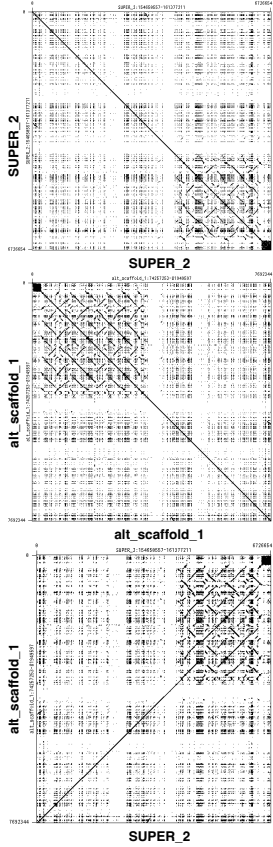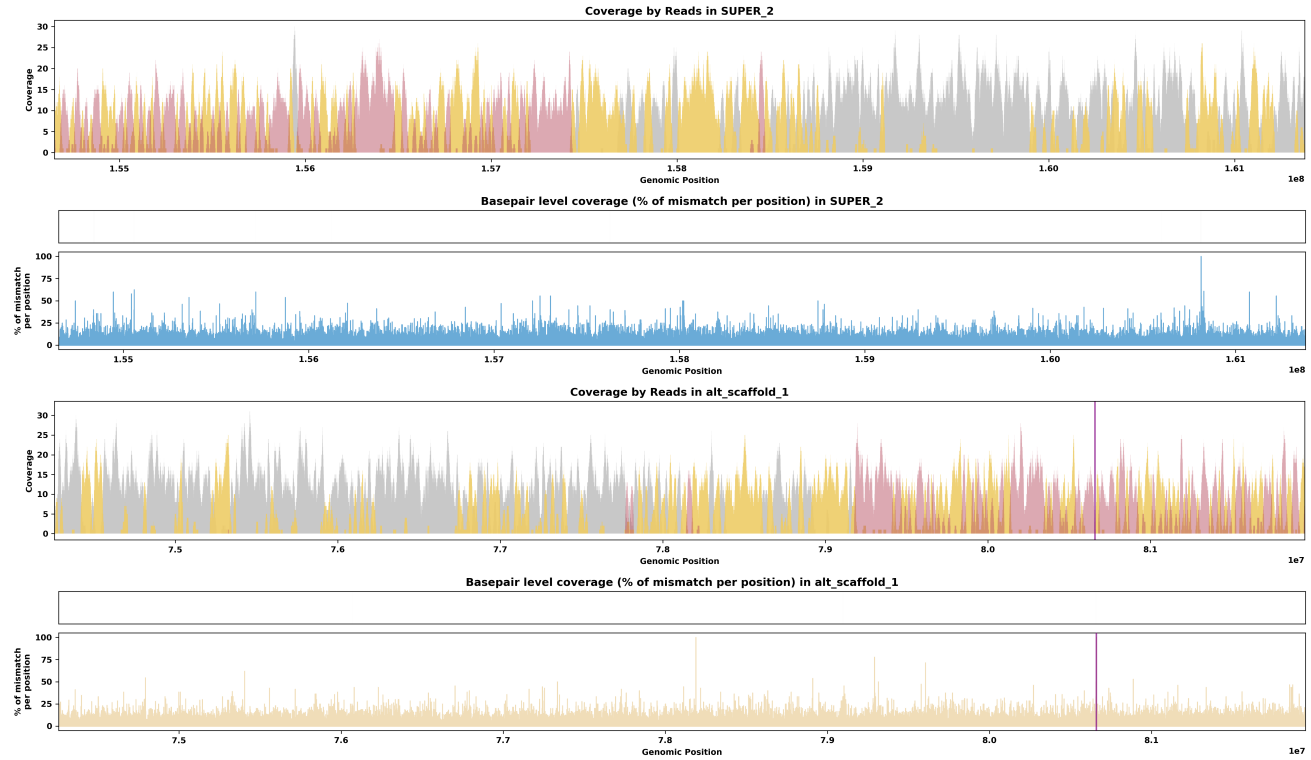

Species ID: mMarMar1

Common Name: European pine marten

Scientific Name: *Martes martes*

Assembly Type: Not Haplotype Resolved

Data Source: VGP

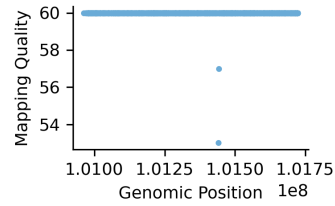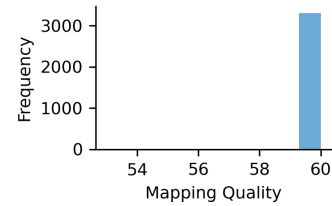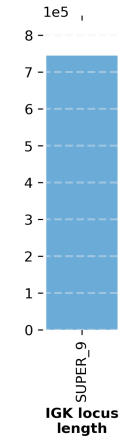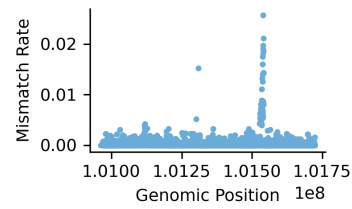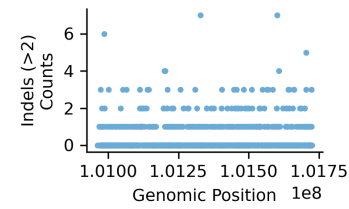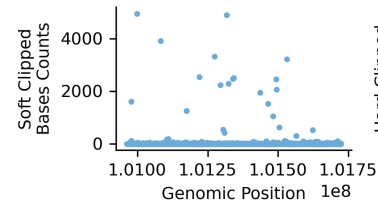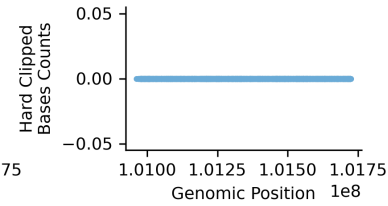

● SUPER\_9

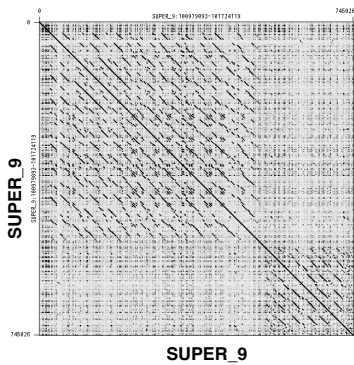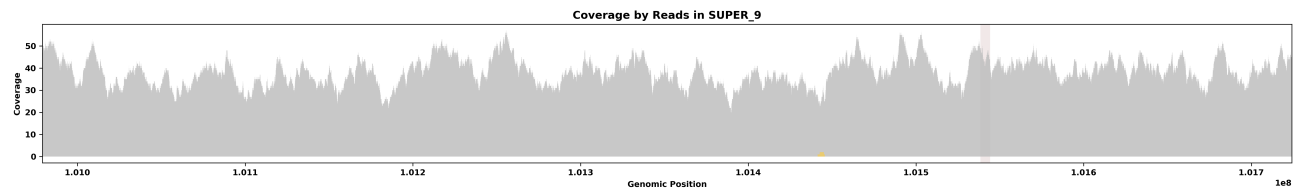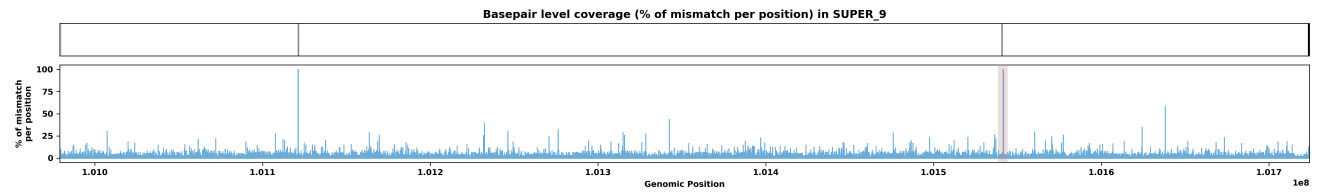

Species ID: mMelMeI3  
 Common Name: European badger  
 Scientific Name: Meles meles  
 Assembly Type: Haplotype Resolved  
 Data Source: VGP

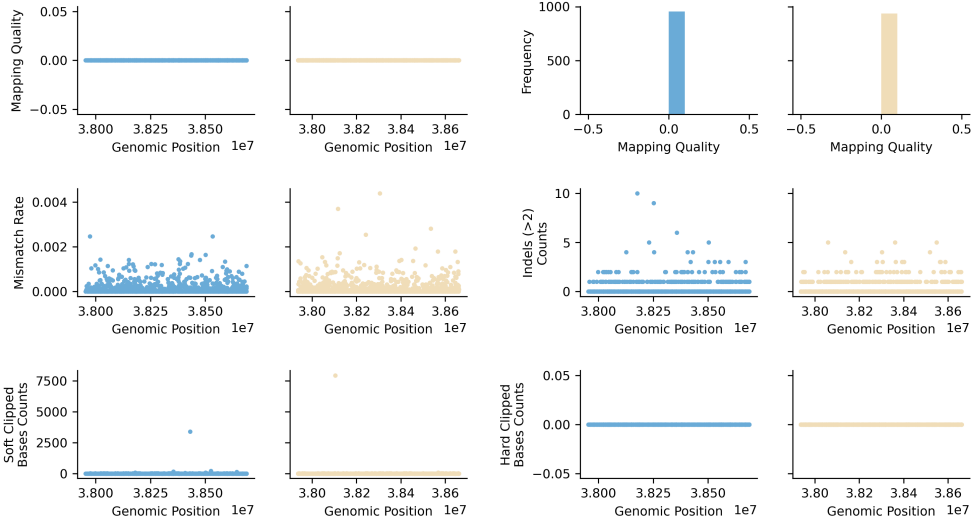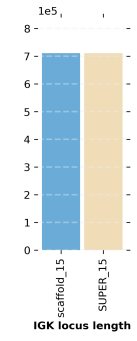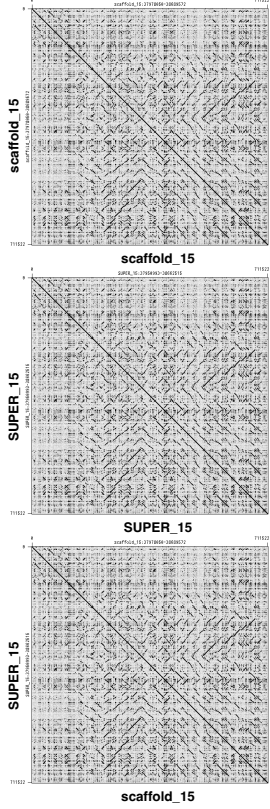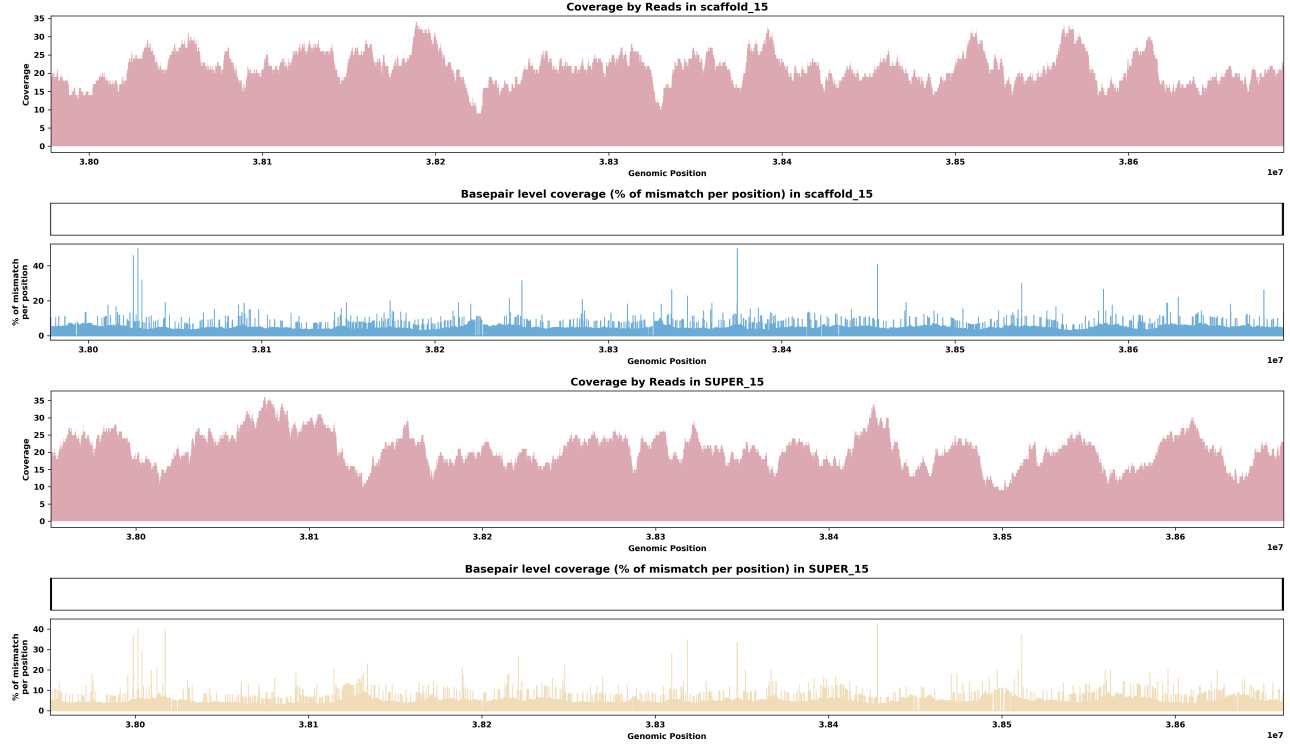

Species ID: mMesDen1

Common Name: Blainville's beaked whale

Scientific Name: *Mesoplodon densirostris*

Assembly Type: Not Haplotype Resolved

Data Source: VGP

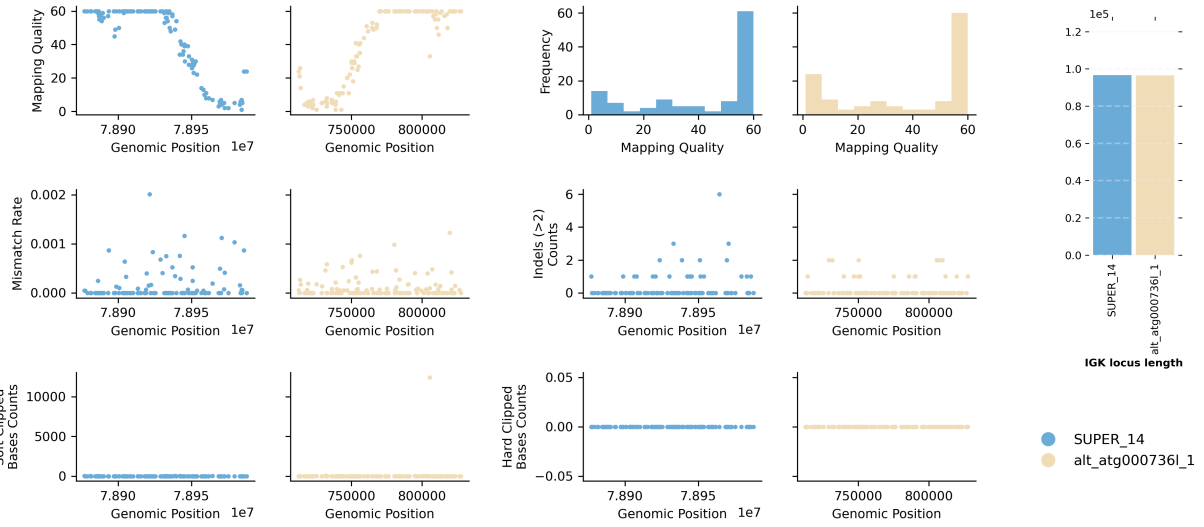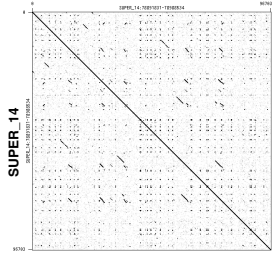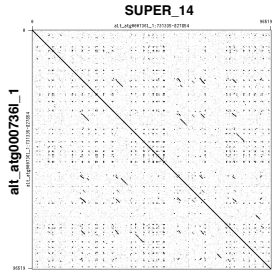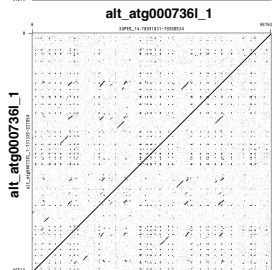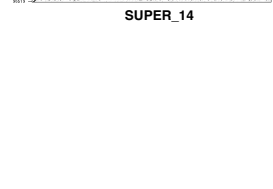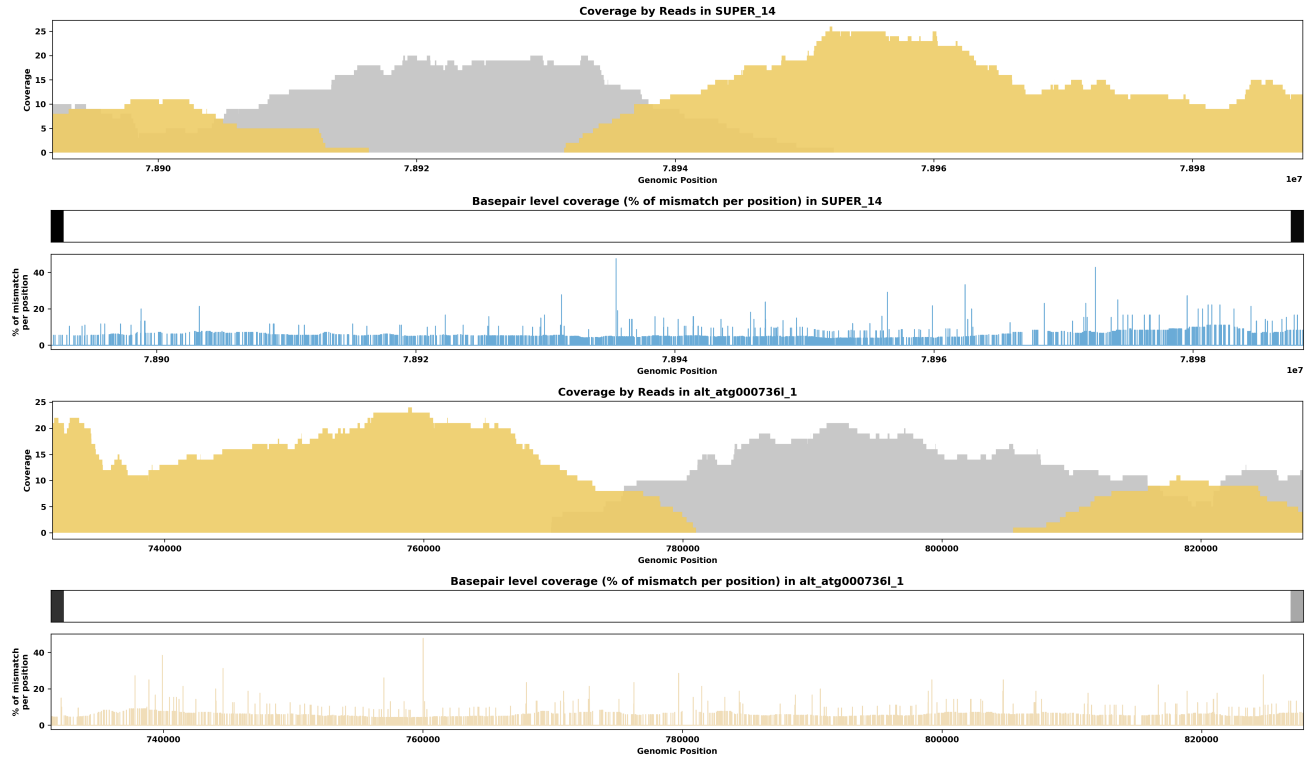

Species ID: mMicCa1  
 Common Name: California Vole  
 Scientific Name: *Microtus californicus*  
 Assembly Type: Haplotype Resolved  
 Data Source: CCGP

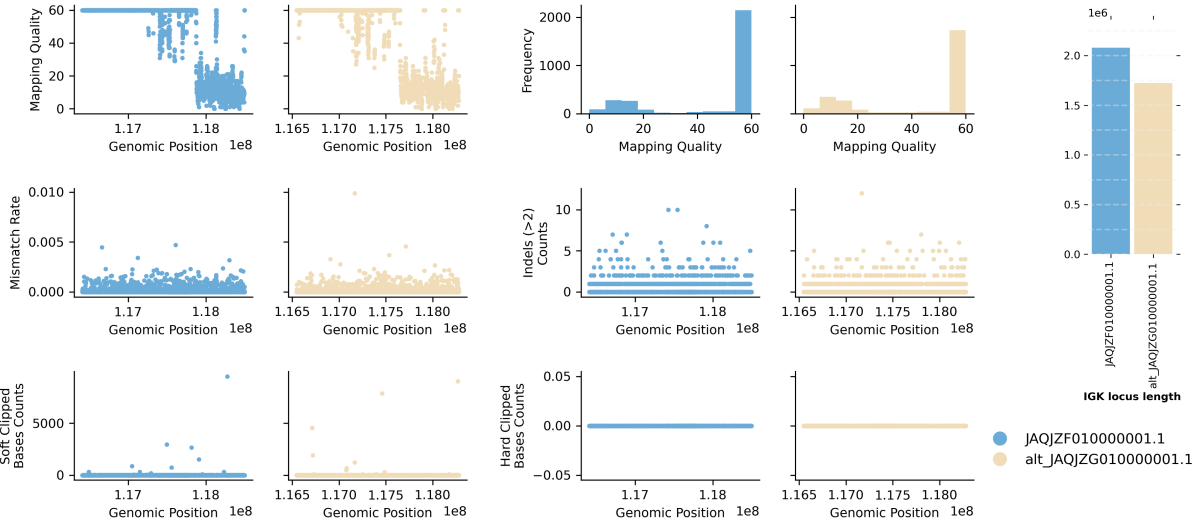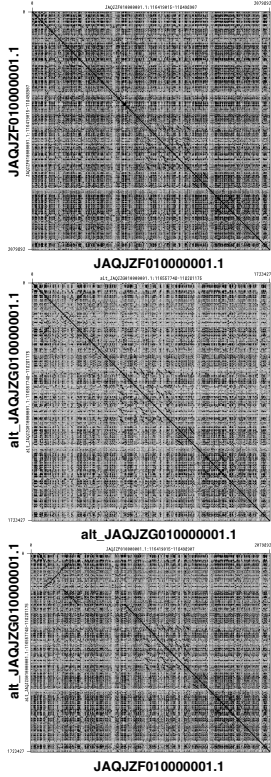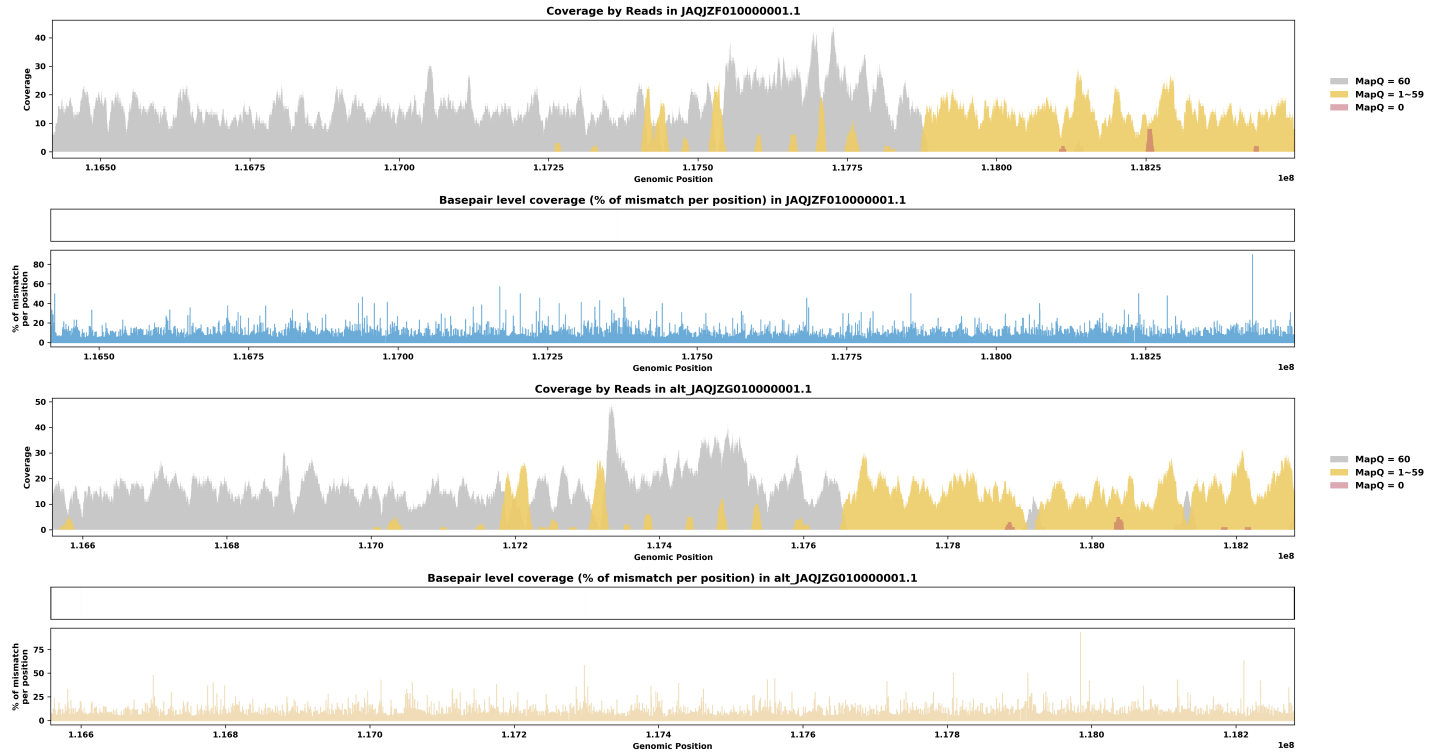

Species ID: mMicMin1  
 Common Name: European harvest mouse  
 Scientific Name: *Micromys minutus*  
 Assembly Type: Not Haplotype Resolved  
 Data Source: VGP

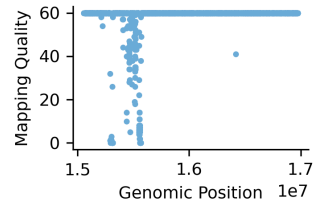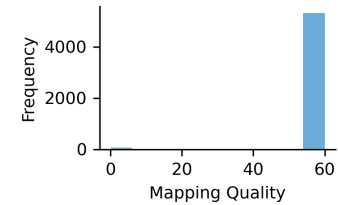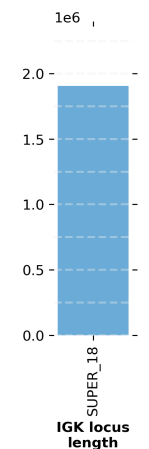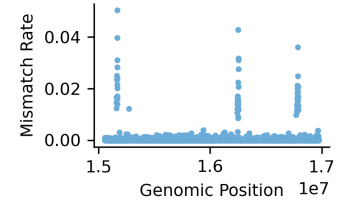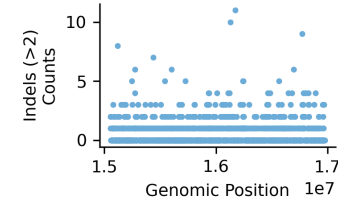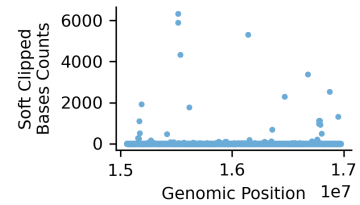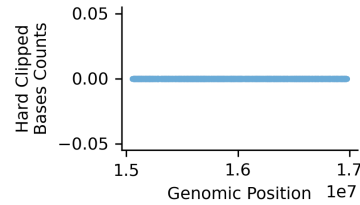

● SUPER\_18

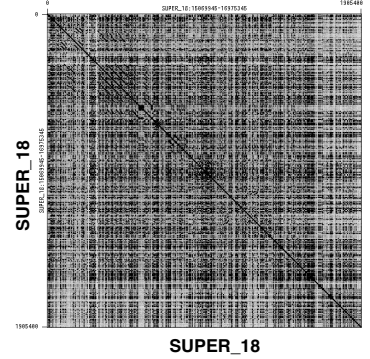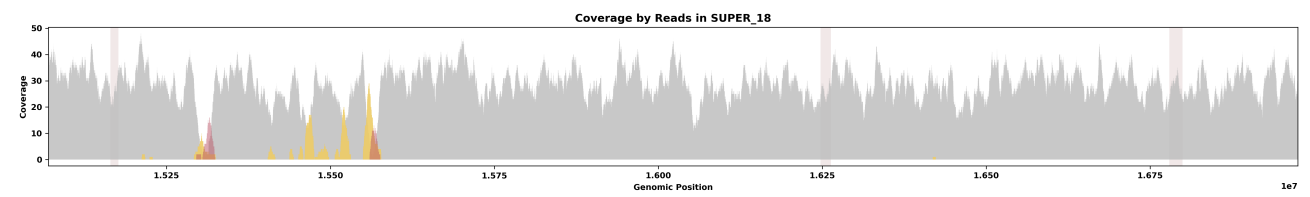

MapQ = 60  
 MapQ = 1-59  
 MapQ = 0

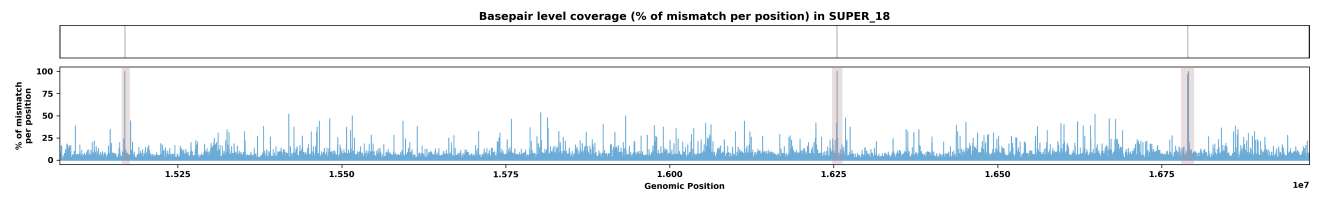

Species ID: mMirAng1  
 Common Name: Northern Elephant Seal  
 Scientific Name: *Mirounga angustirostris*  
 Assembly Type: Haplotype Resolved  
 Data Source: CCGP

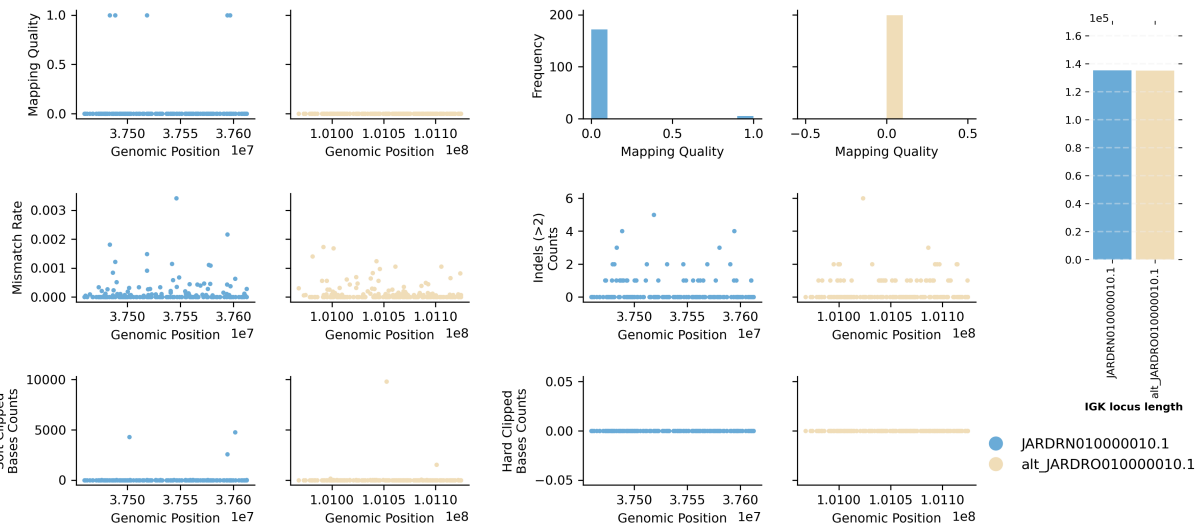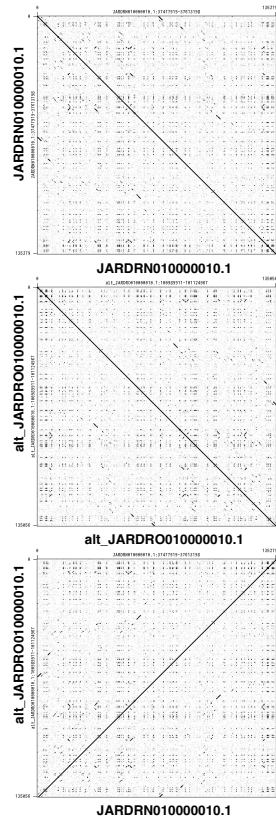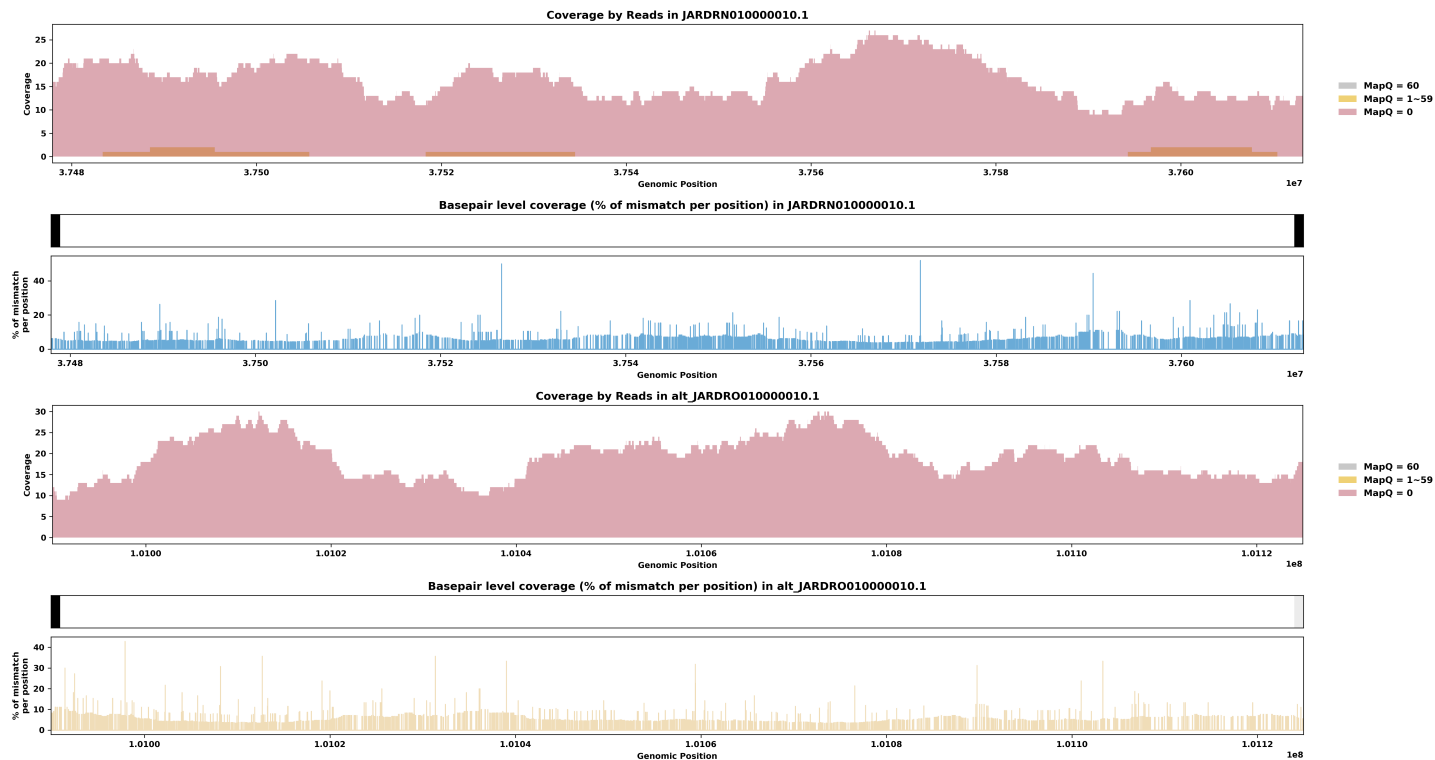



Species ID: mMonDom1

Common Name: gray short-tailed opossum

Scientific Name: *Monodelphis domestica*

Assembly Type: Not Haplotype Resolved

Data Source: VGP

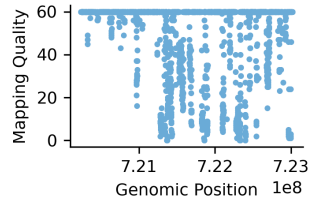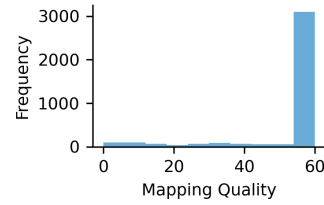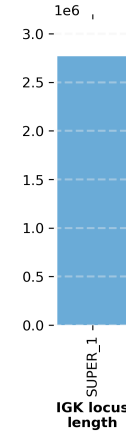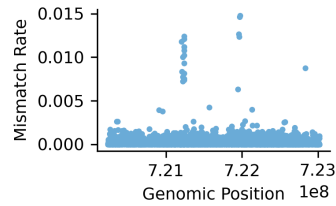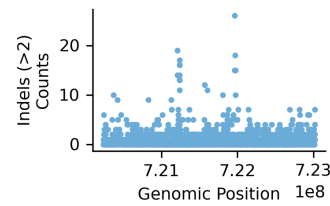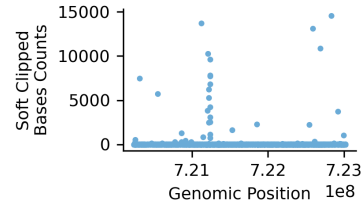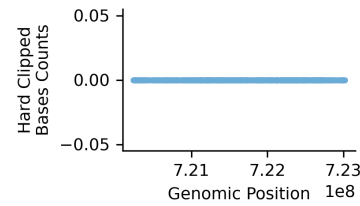

● SUPER\_1

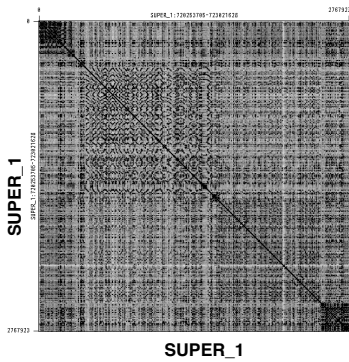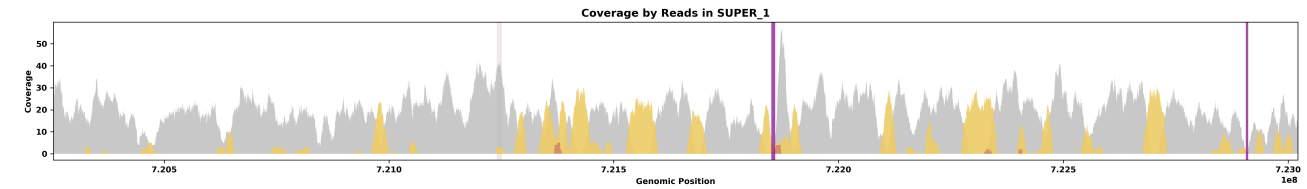

■ MapQ = 60  
■ MapQ = 1-59  
■ MapQ = 0

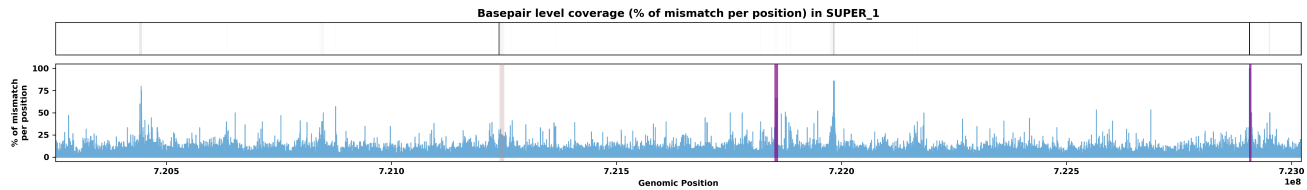

Species ID: mMunRee1  
 Common Name: Reeves' muntjac  
 Scientific Name: Muntiacus reevesi  
 Assembly Type: Not Haplotype Resolved  
 Data Source: VGP

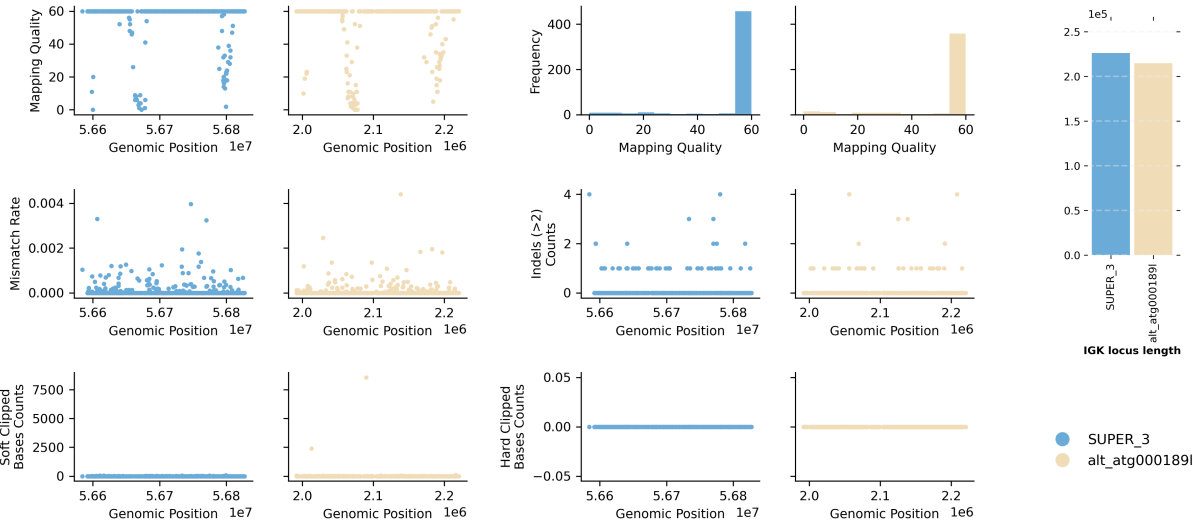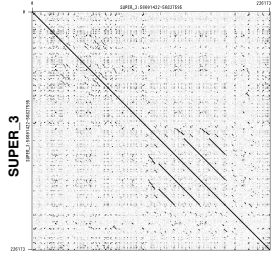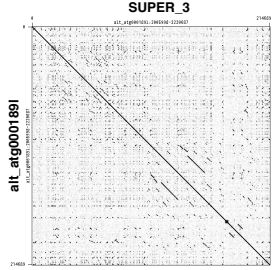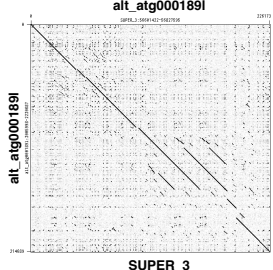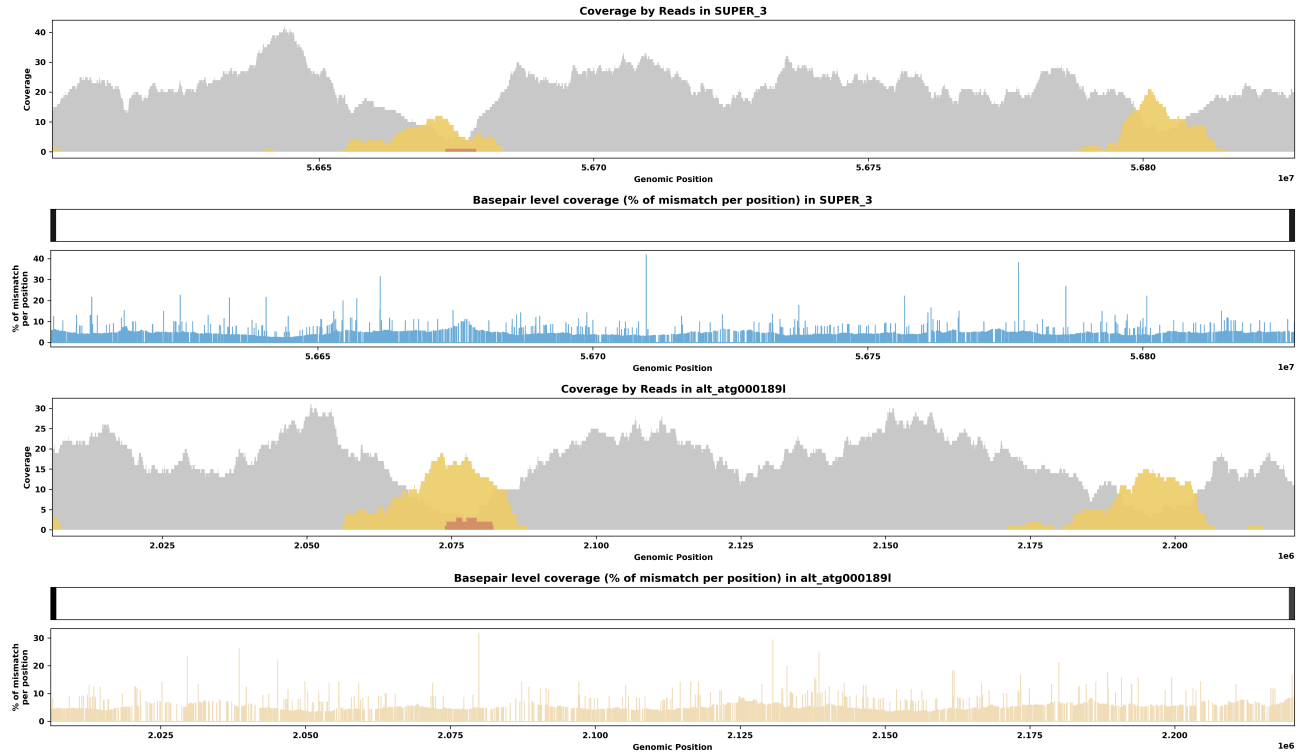

Species ID: mMusAve1  
 Common Name: hazel dormouse  
 Scientific Name: Muscardinus avellanarius  
 Assembly Type: Not Haplotype Resolved  
 Data Source: VGP

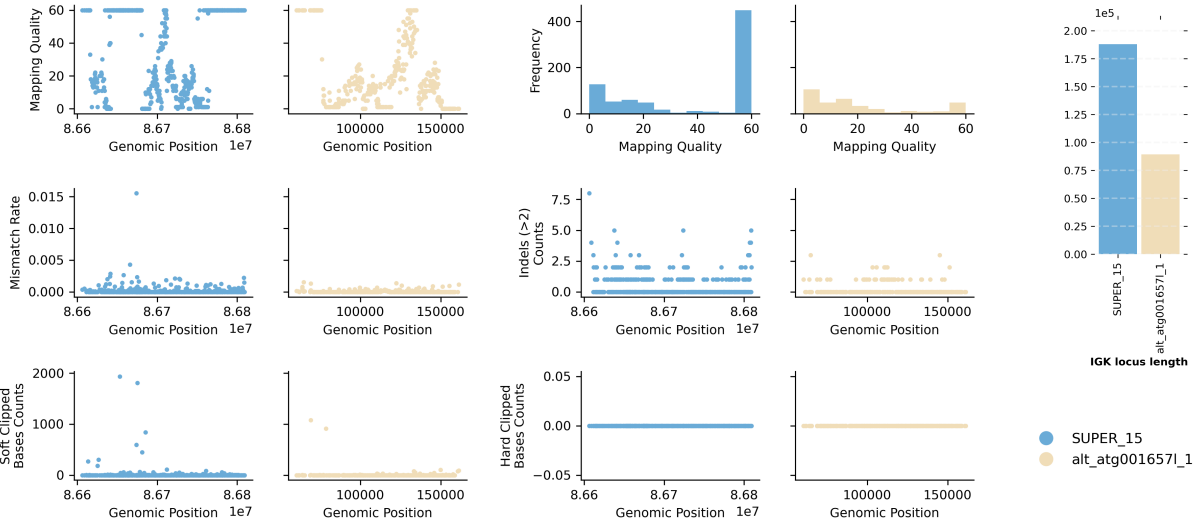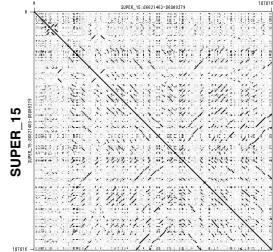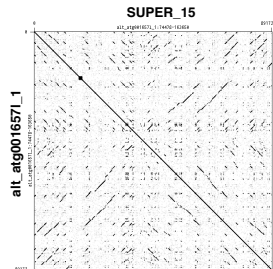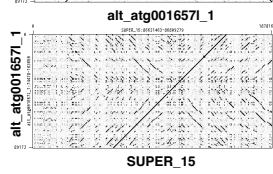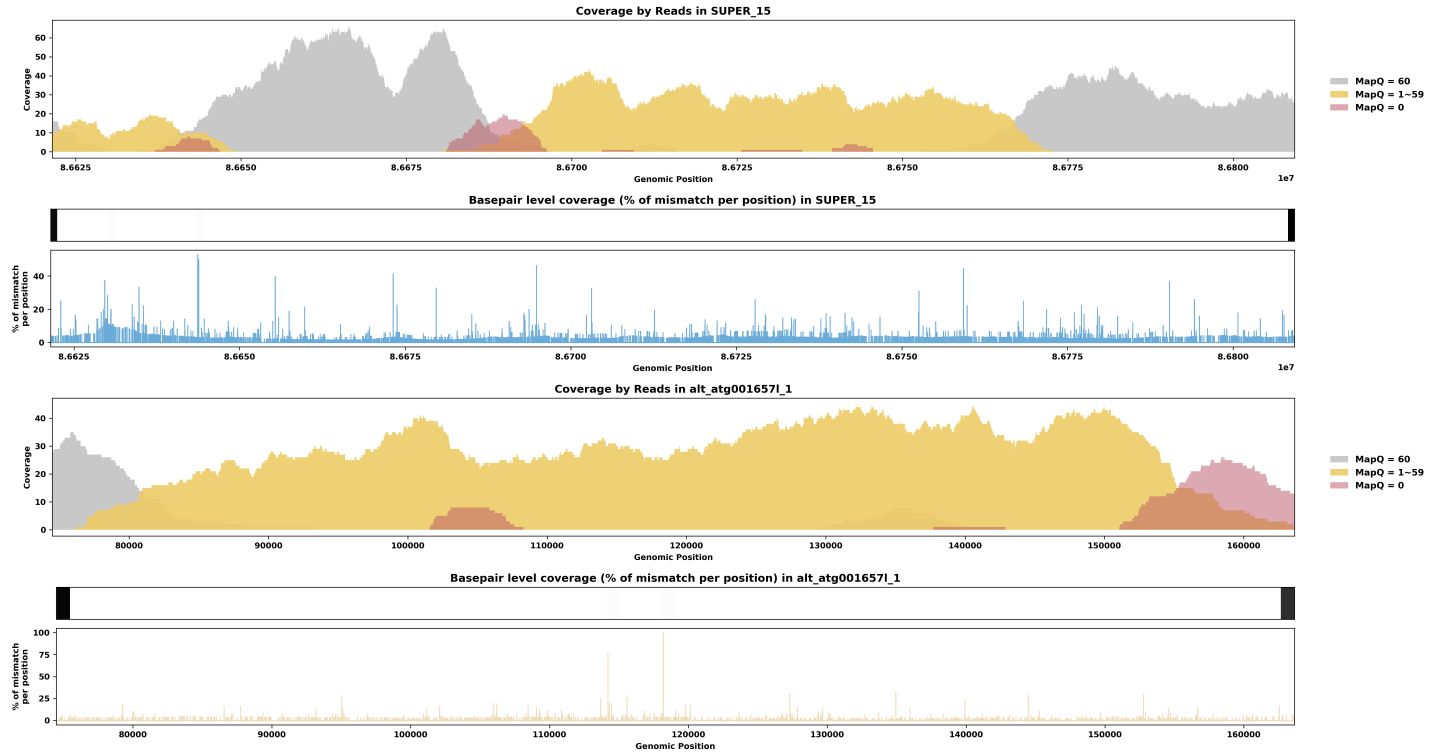

Species ID: mMusLut2  
 Common Name: European mink  
 Scientific Name: Mustela lutreola  
 Assembly Type: Not Haplotype Resolved  
 Data Source: VGP

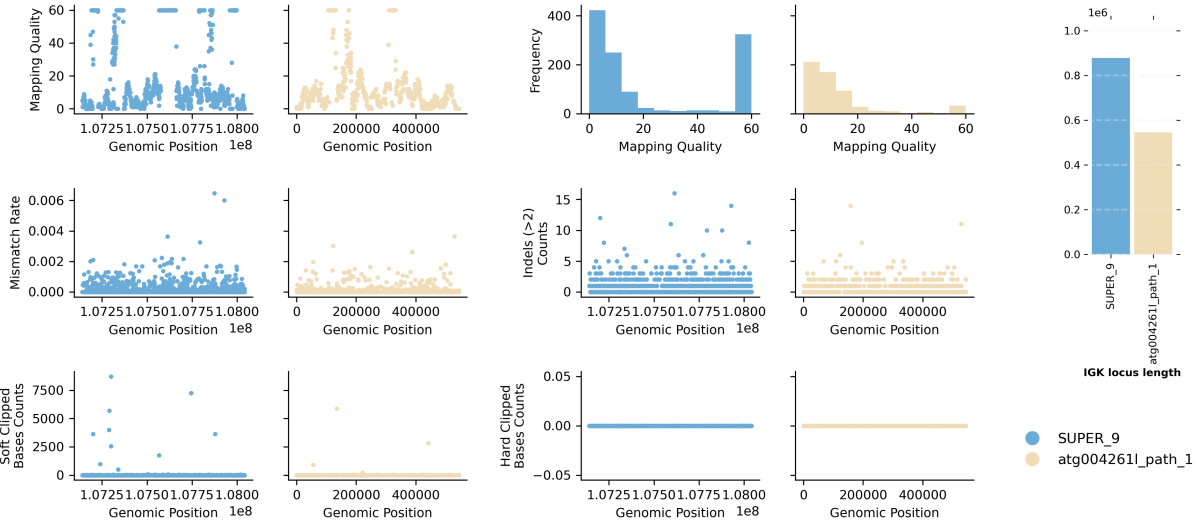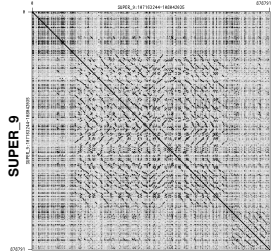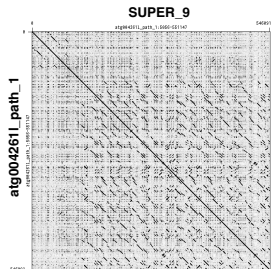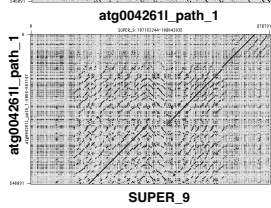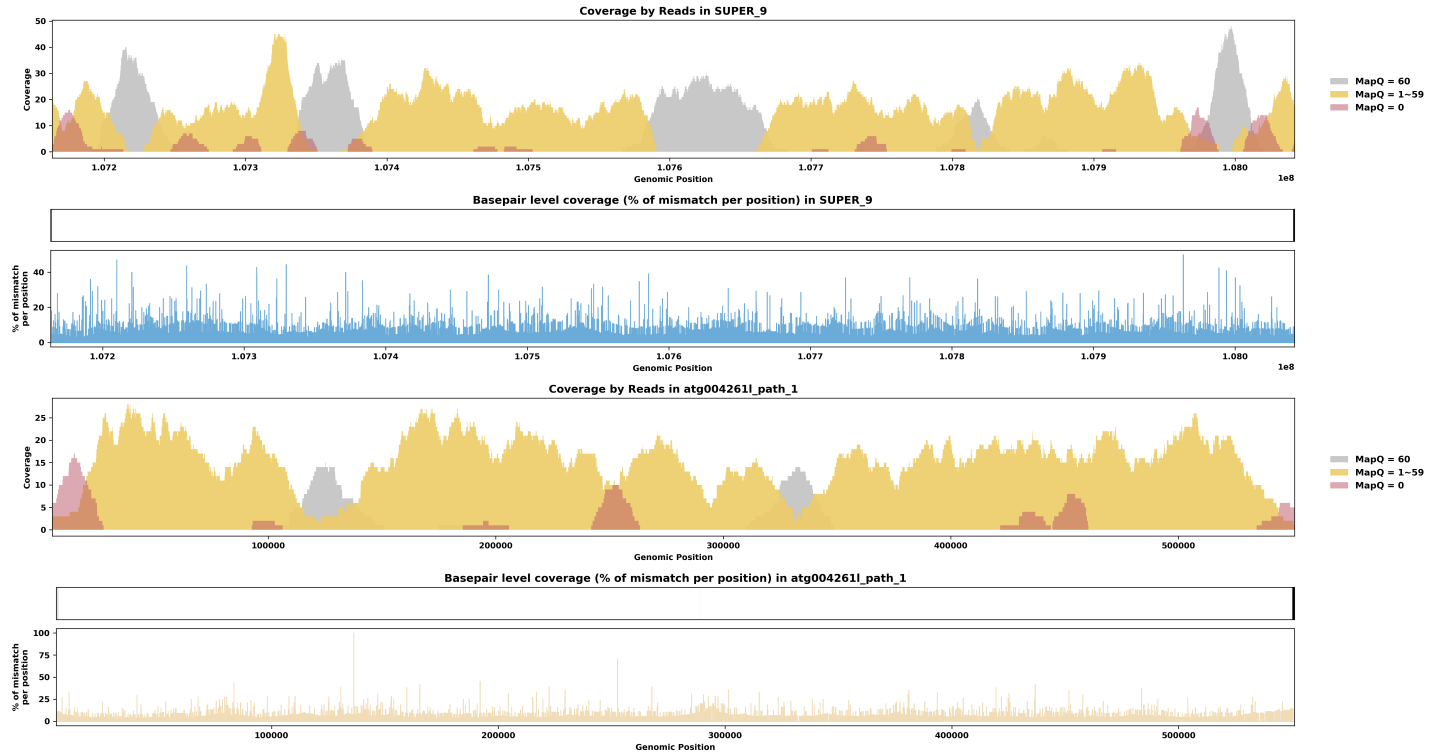

Species ID: mMusNiv1

Common Name: Least weasel

Scientific Name: *Mustela nivalis*

Assembly Type: Haplotype Resolved

Data Source: VGP

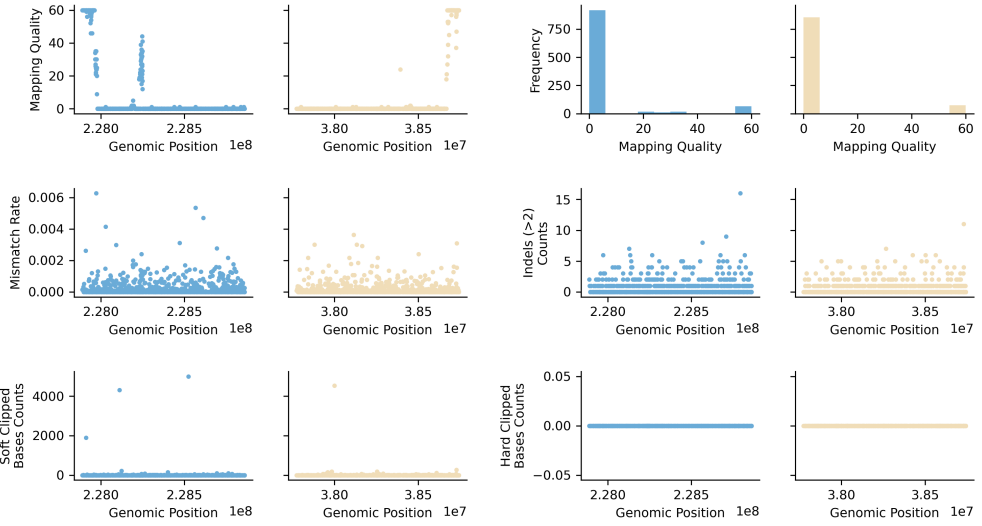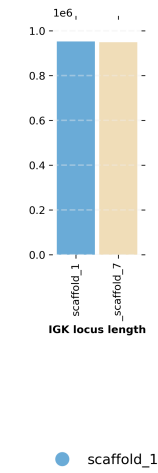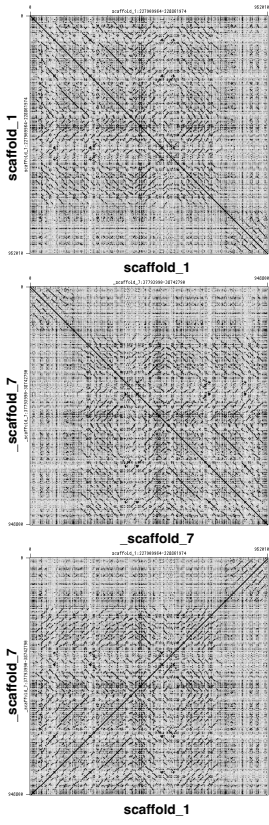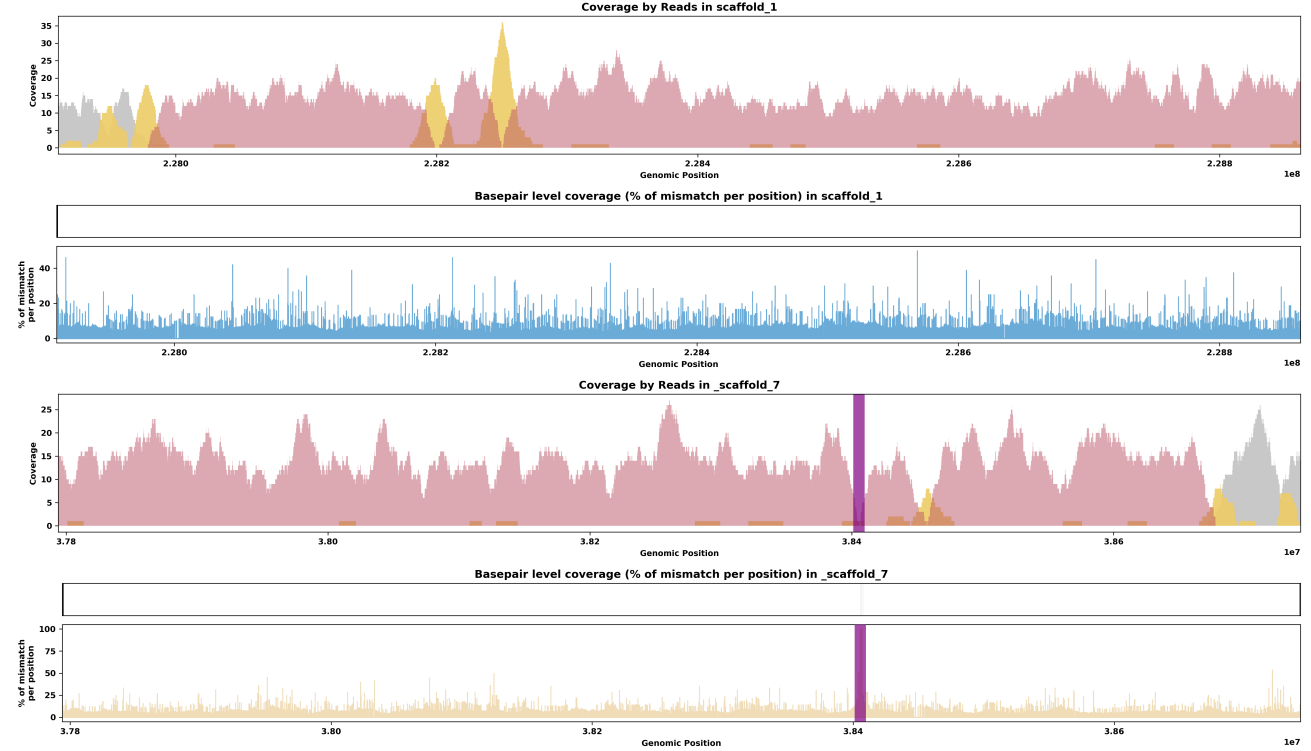

Species ID: mNeoNeb1  
 Common Name: Clouded Leopard  
 Scientific Name: Neofelis\_nebulosa  
 Assembly Type: Not Haplotype Resolved  
 Data Source: VGP

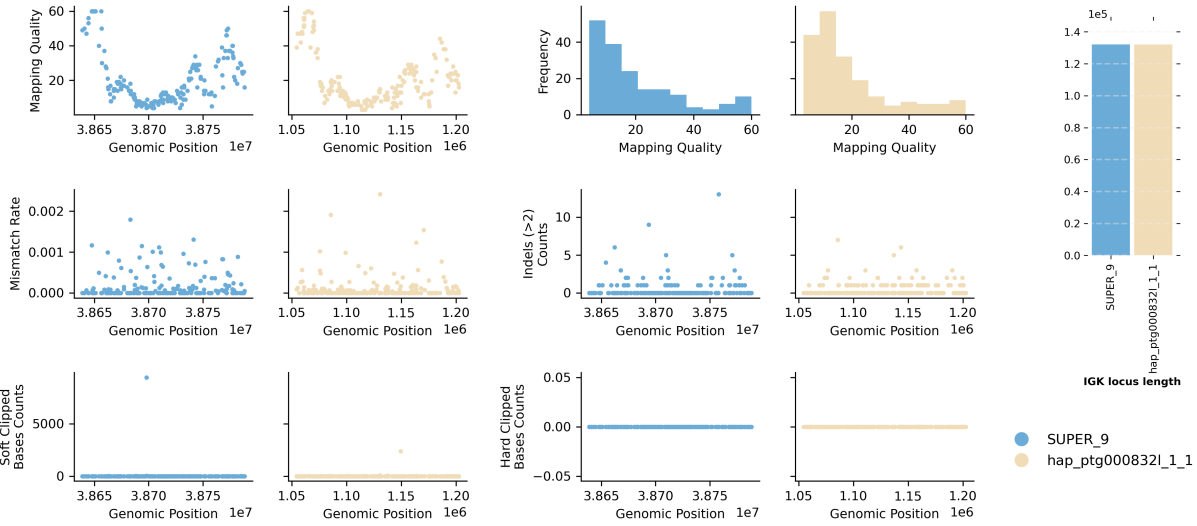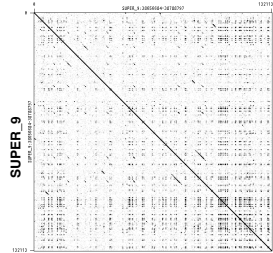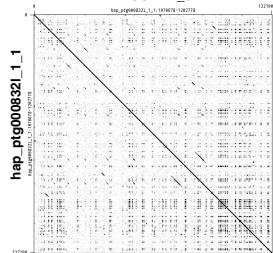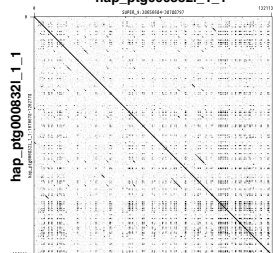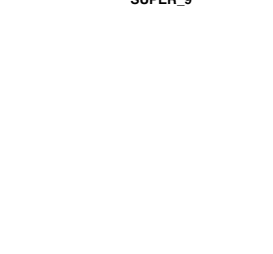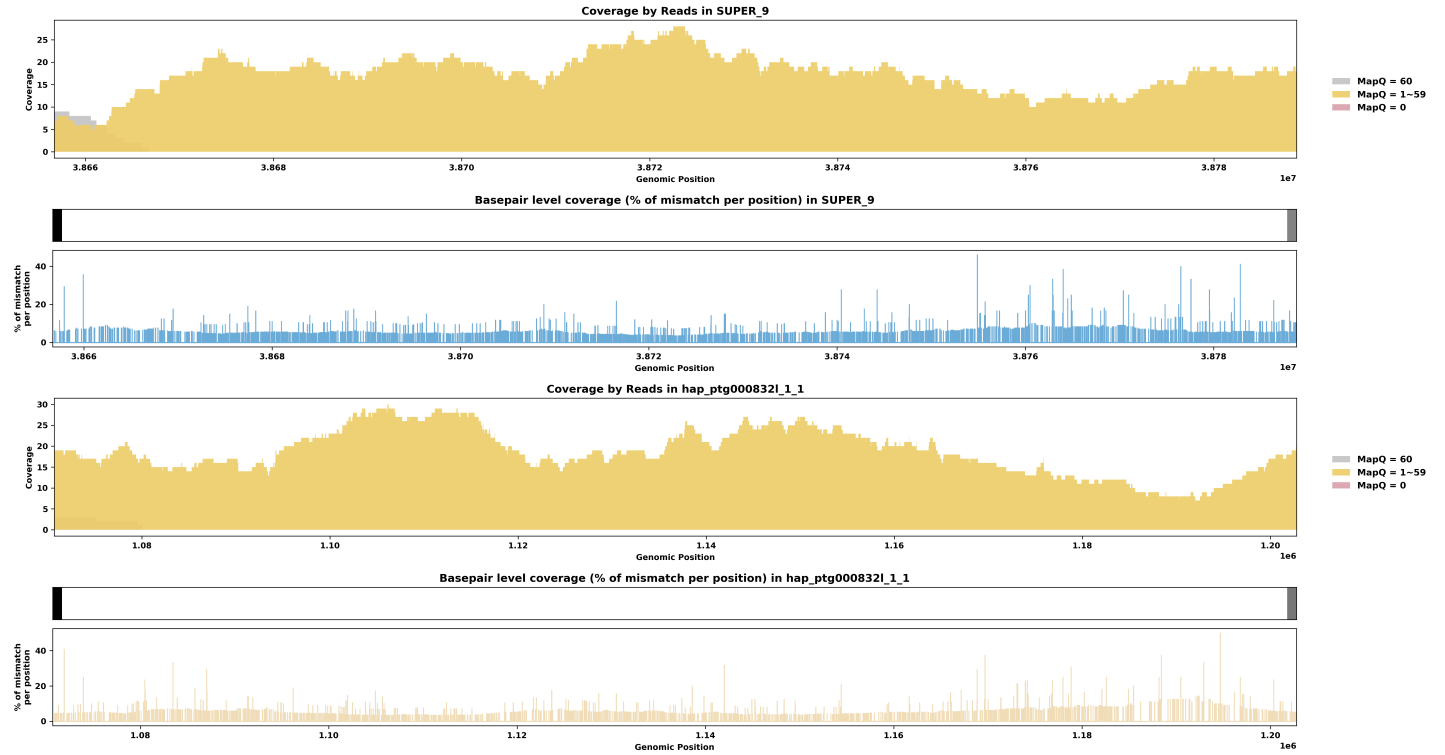

Species ID: mNycCou1  
 Common Name: slow loris  
 Scientific Name: Nycticebus coucang  
 Assembly Type: Not Haplotype Resolved  
 Data Source: VGP

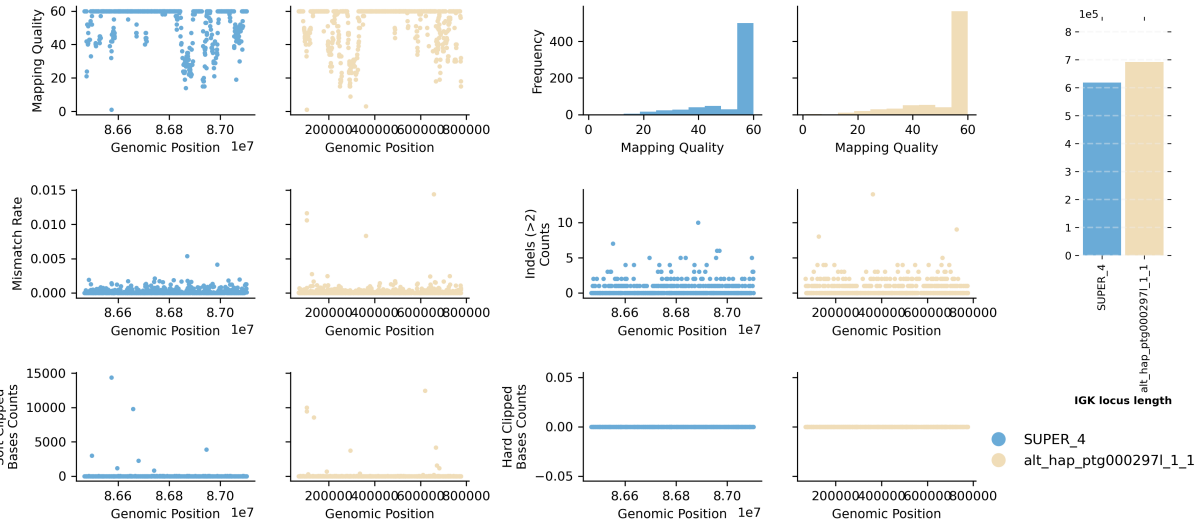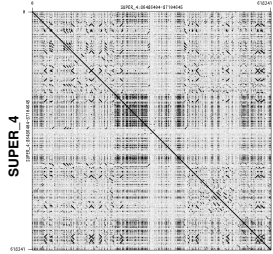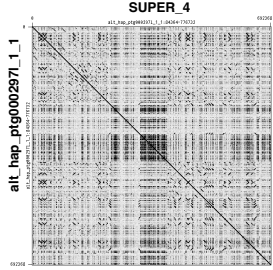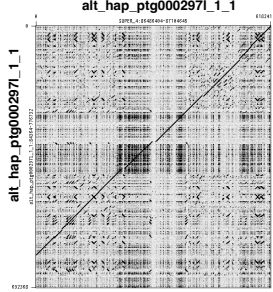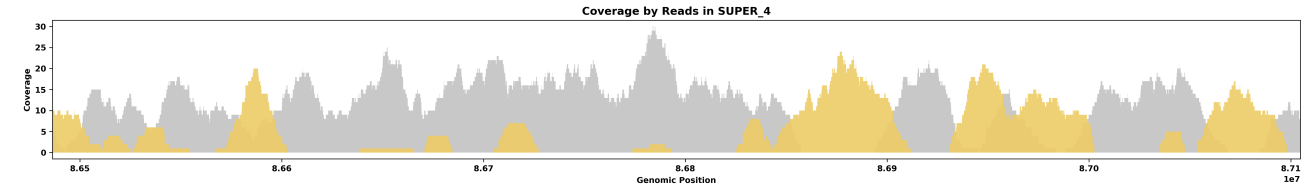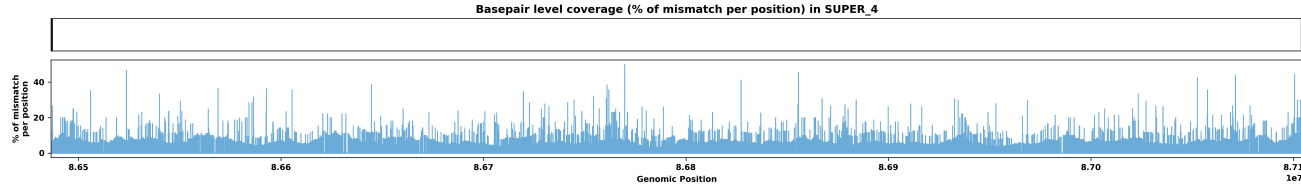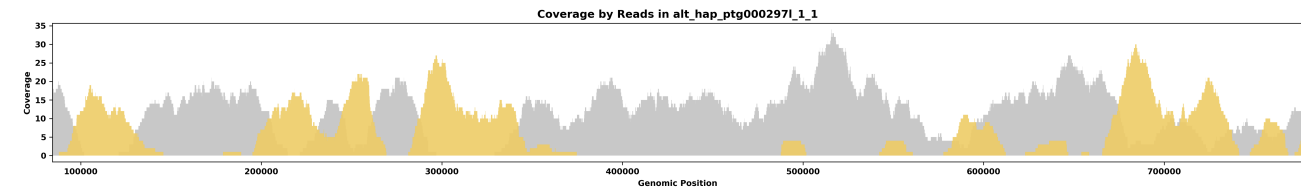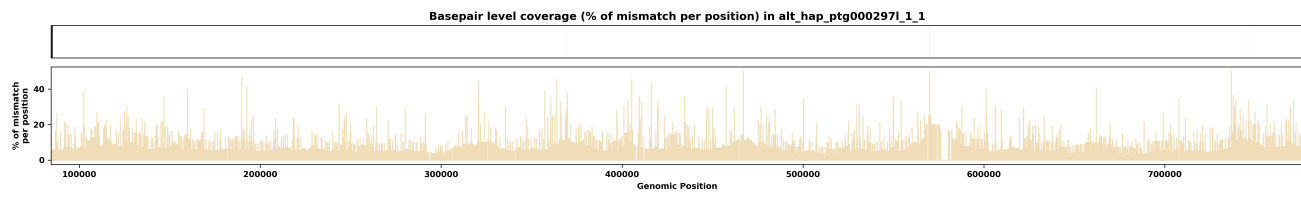

Species ID: mOrcOrc1

Common Name: killer whale

Scientific Name: Orcinus orca

Assembly Type: Not Haplotype Resolved

Data Source: VGP

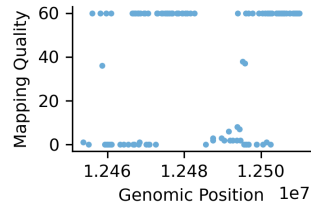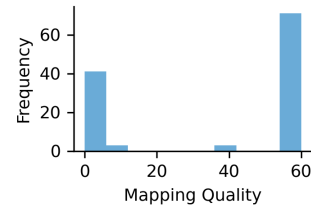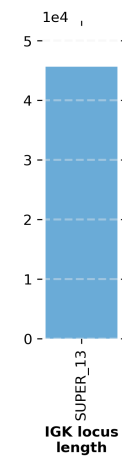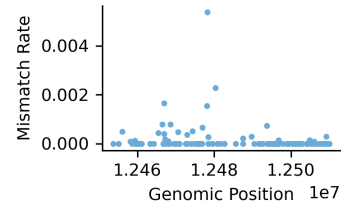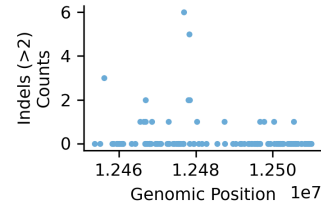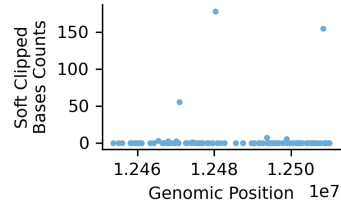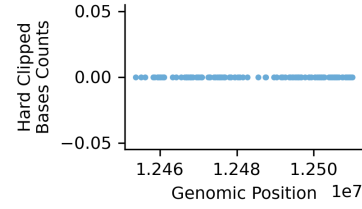

● SUPER\_13

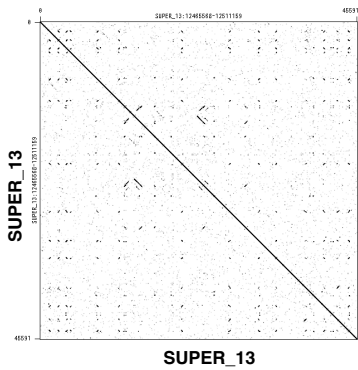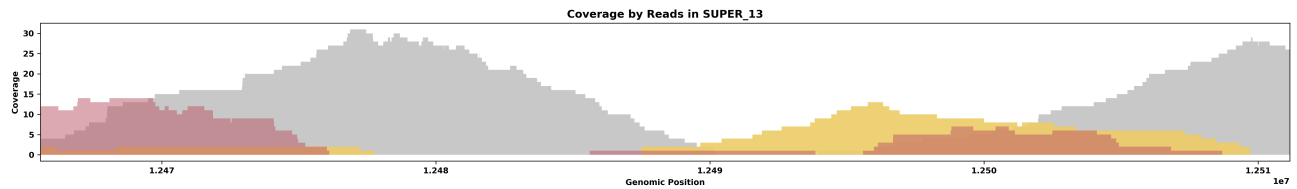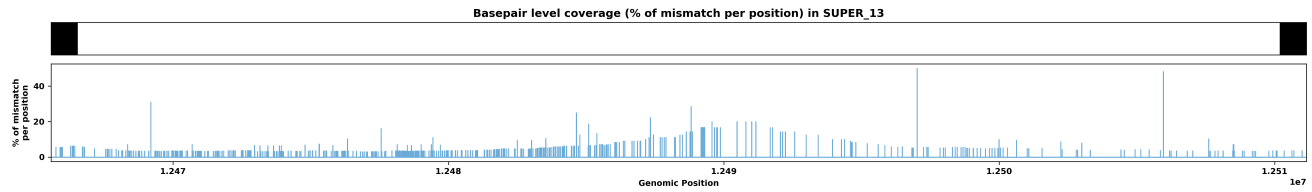



Species ID: mOryCun1

Common Name: rabbit

Scientific Name: *Oryctolagus cuniculus*

Assembly Type: Not Haplotype Resolved

Data Source: VGP

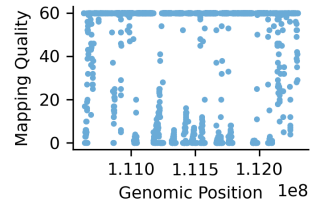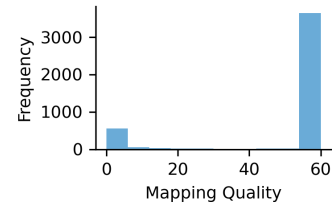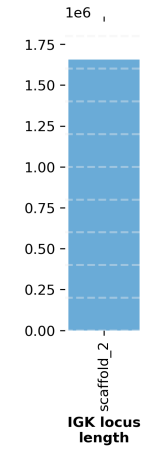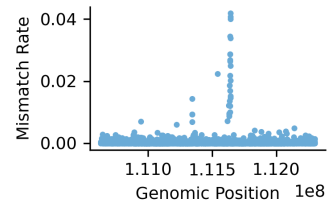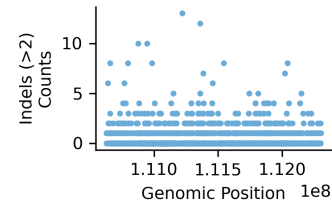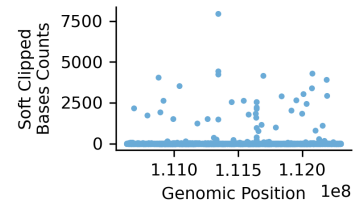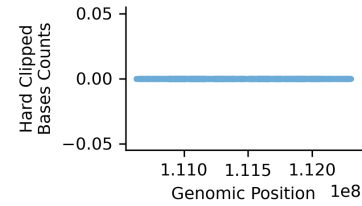

● scaffold\_2

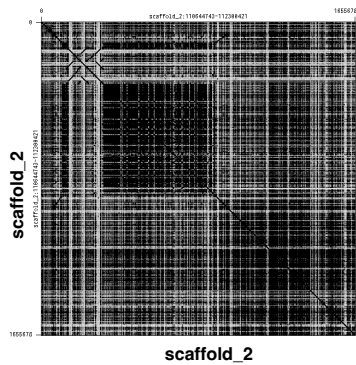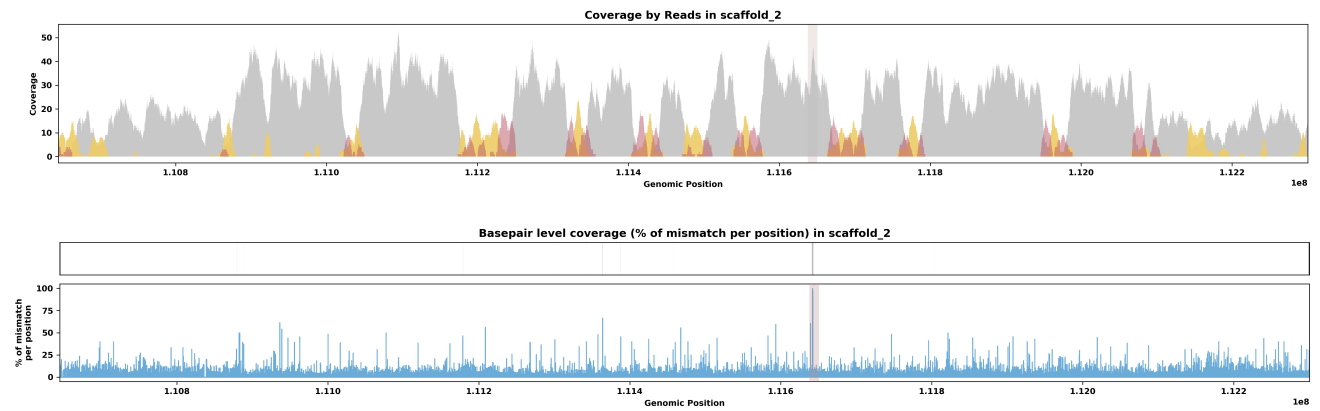

Species ID: mPanPan1  
 Common Name: Bonobo  
 Scientific Name: Pan paniscus  
 Assembly Type: Haplotype Resolved  
 Data Source: T2T Primate

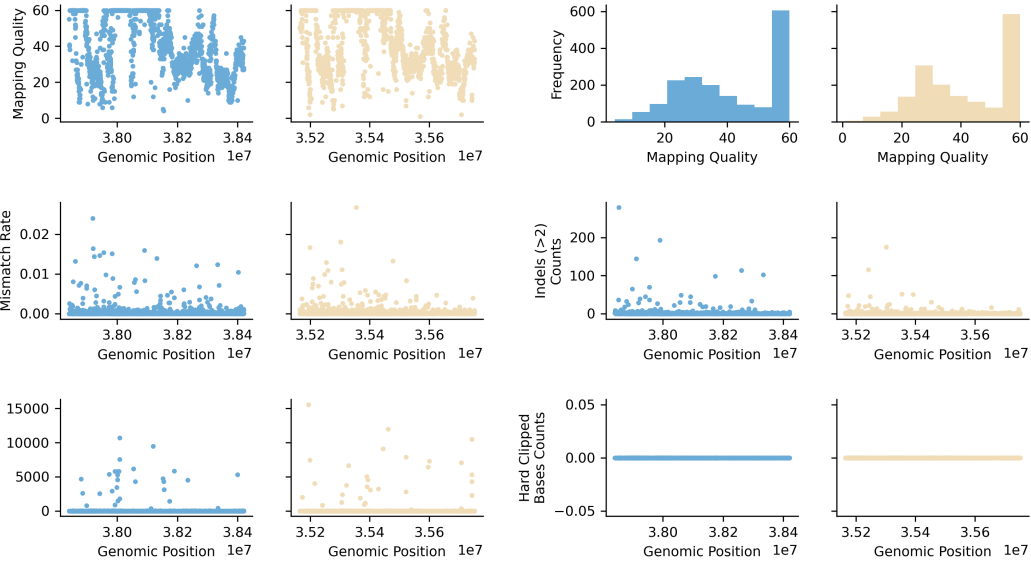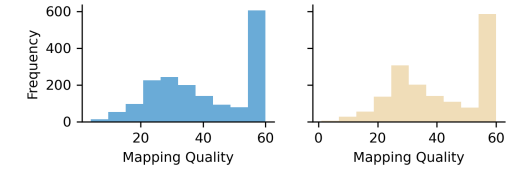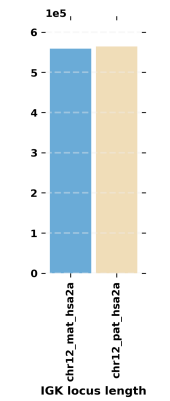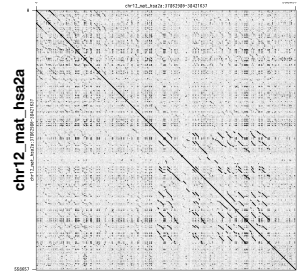

chr12\_mat\_hsa2a

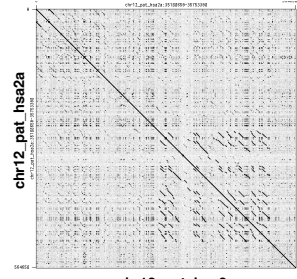

chr12\_pat\_hsa2a

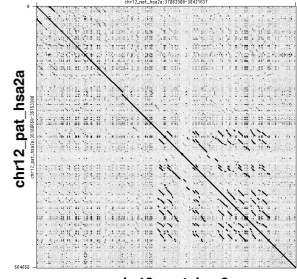

chr12\_mat\_hsa2a

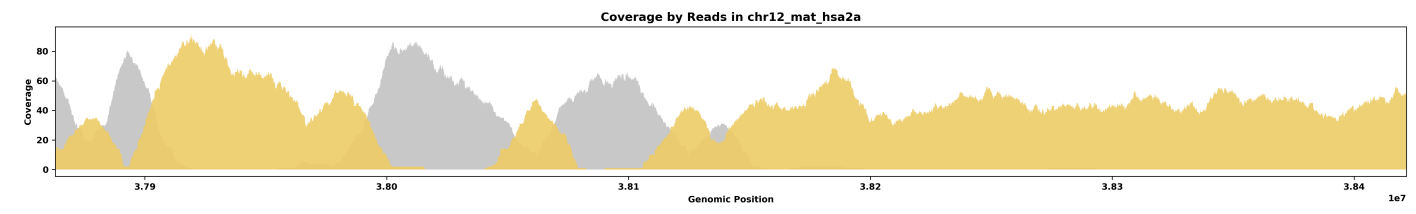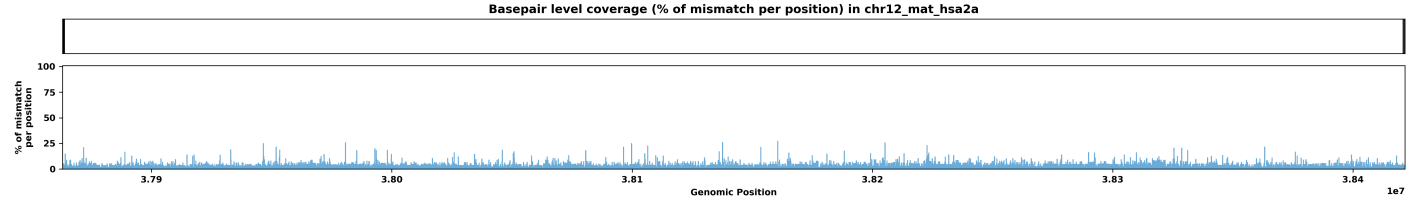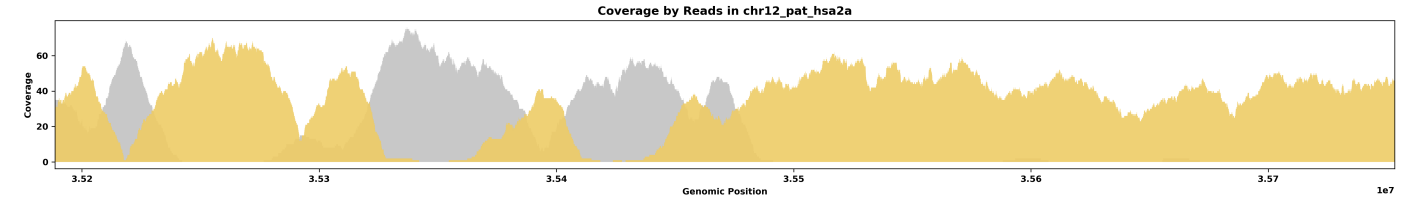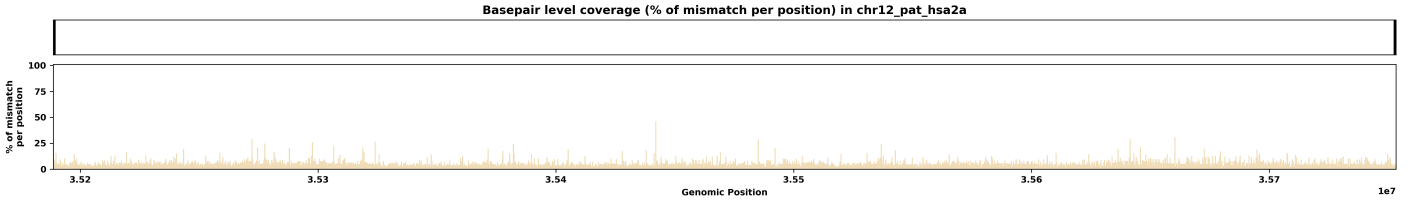

Species ID: mPerMan1  
 Common Name: deer mouse  
 Scientific Name: *Peromyscus maniculatus*  
 Assembly Type: Not Haplotype Resolved  
 Data Source: CCGP

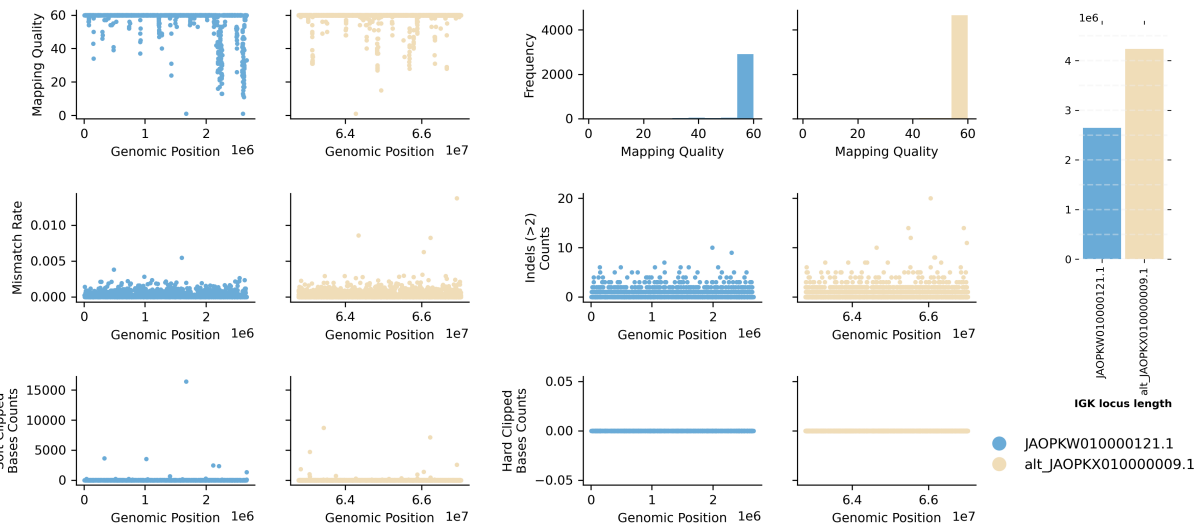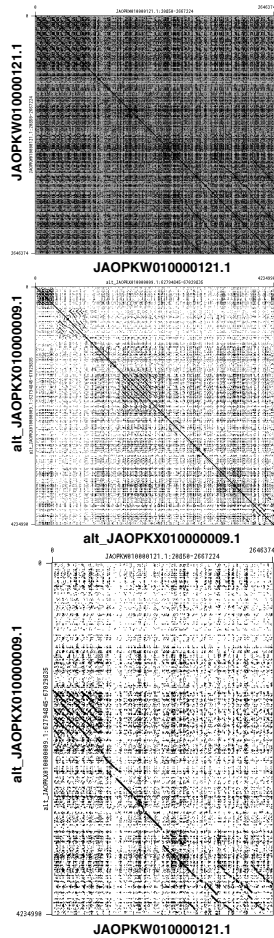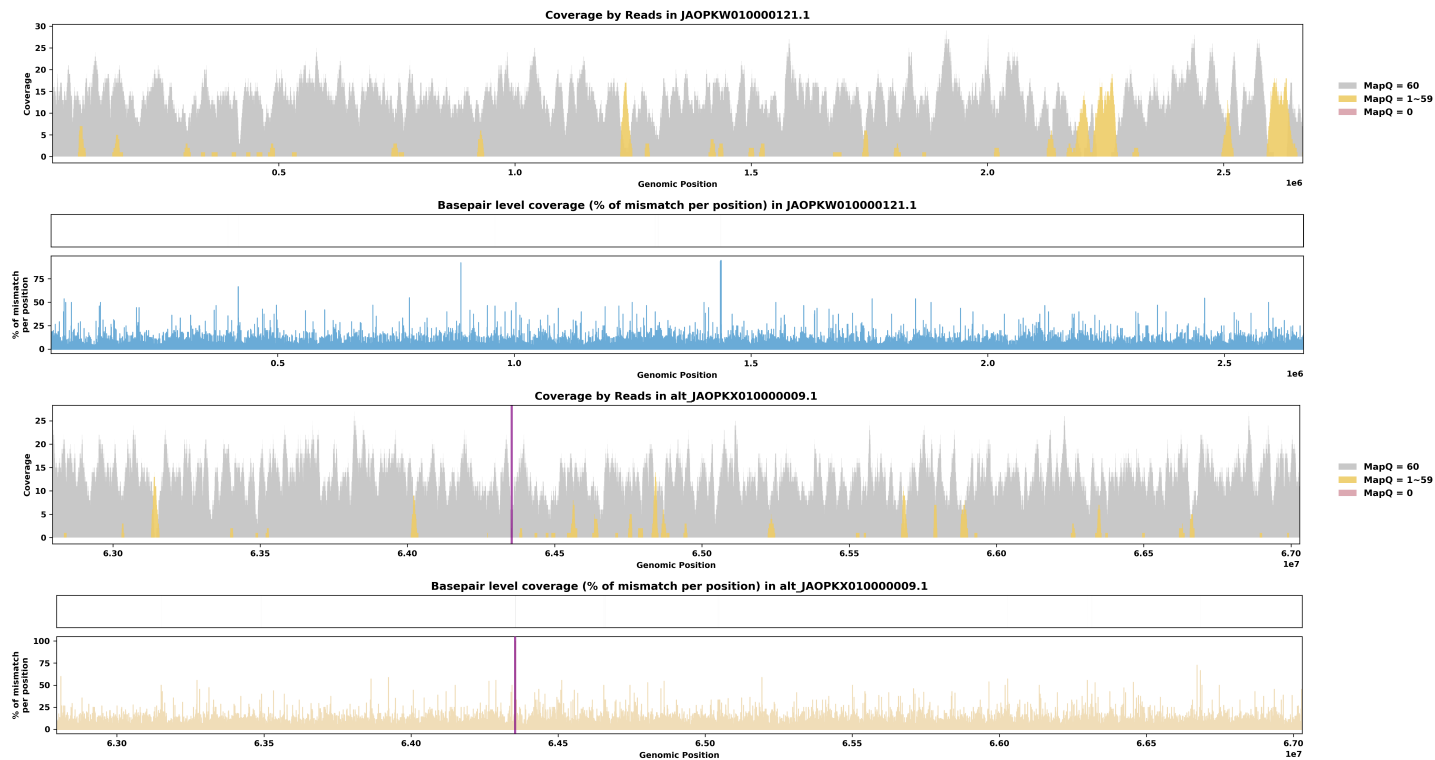

Species ID: mPhoPho1  
 Common Name: harbor porpoise  
 Scientific Name: Phocoena phocoena  
 Assembly Type: Not Haplotype Resolved  
 Data Source: VGP

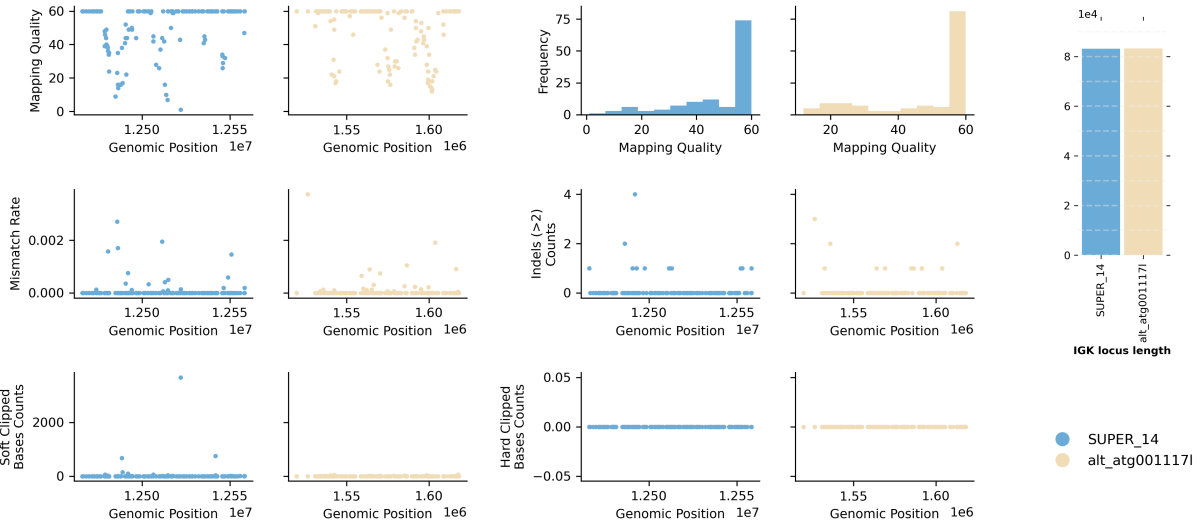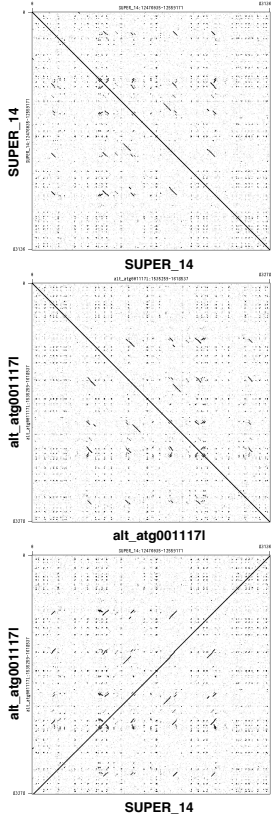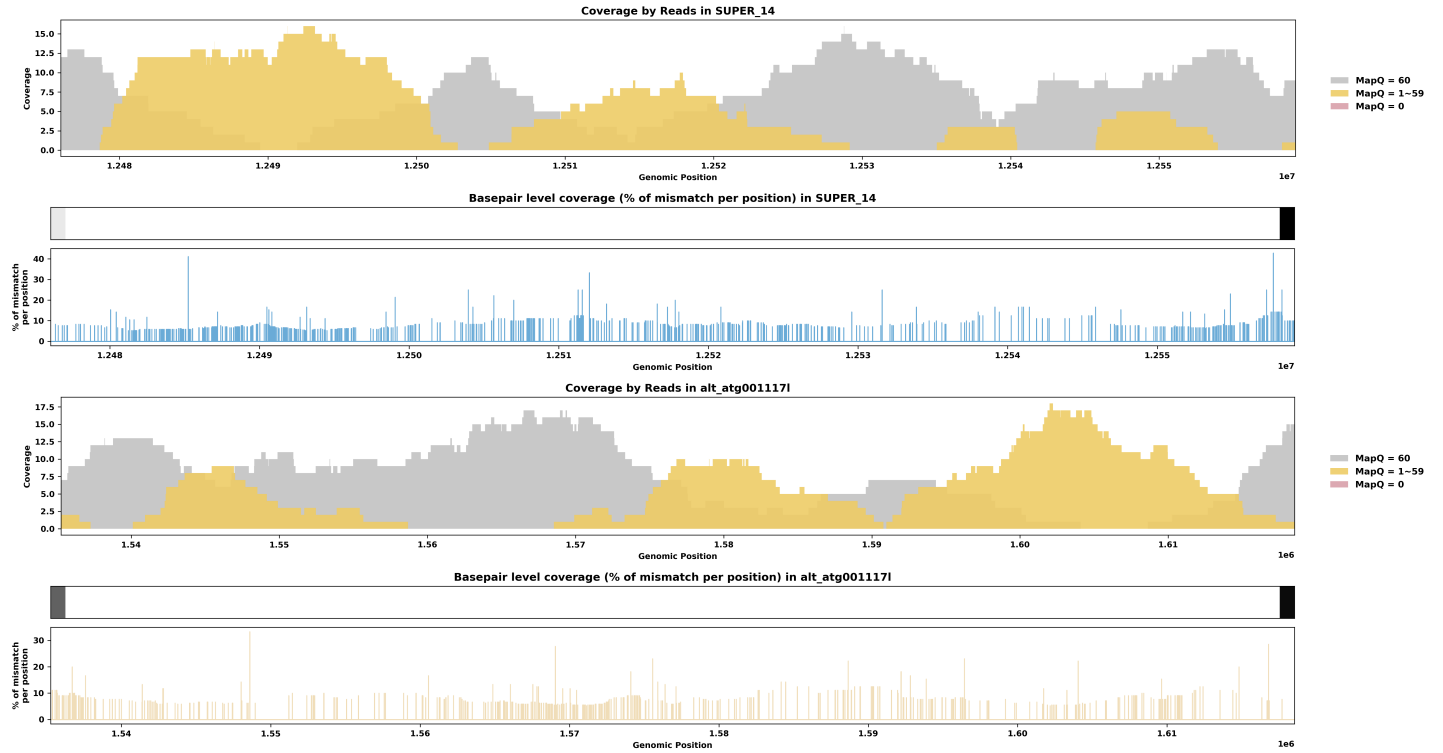

Species ID: mPonAbe1

Common Name: Sumatran orangutan

Scientific Name: Pongo\_abelii

Assembly Type: Haplotype Resolved

Data Source: T2T Primate

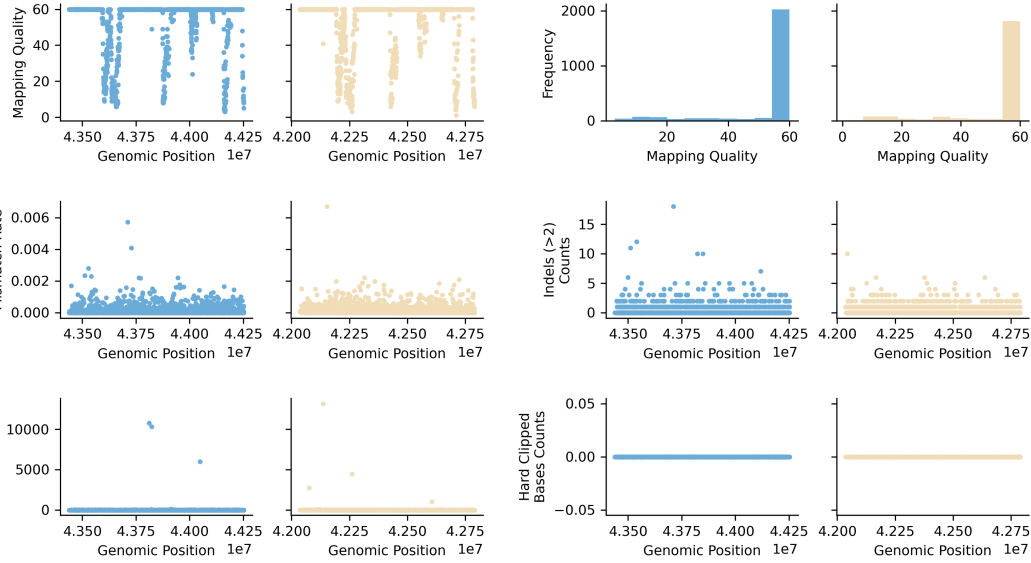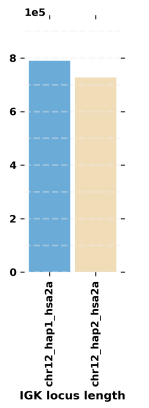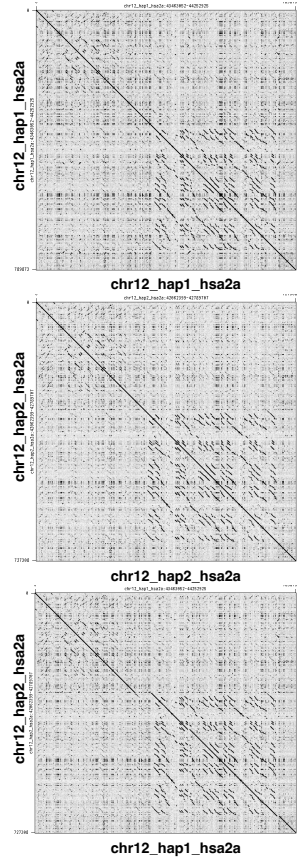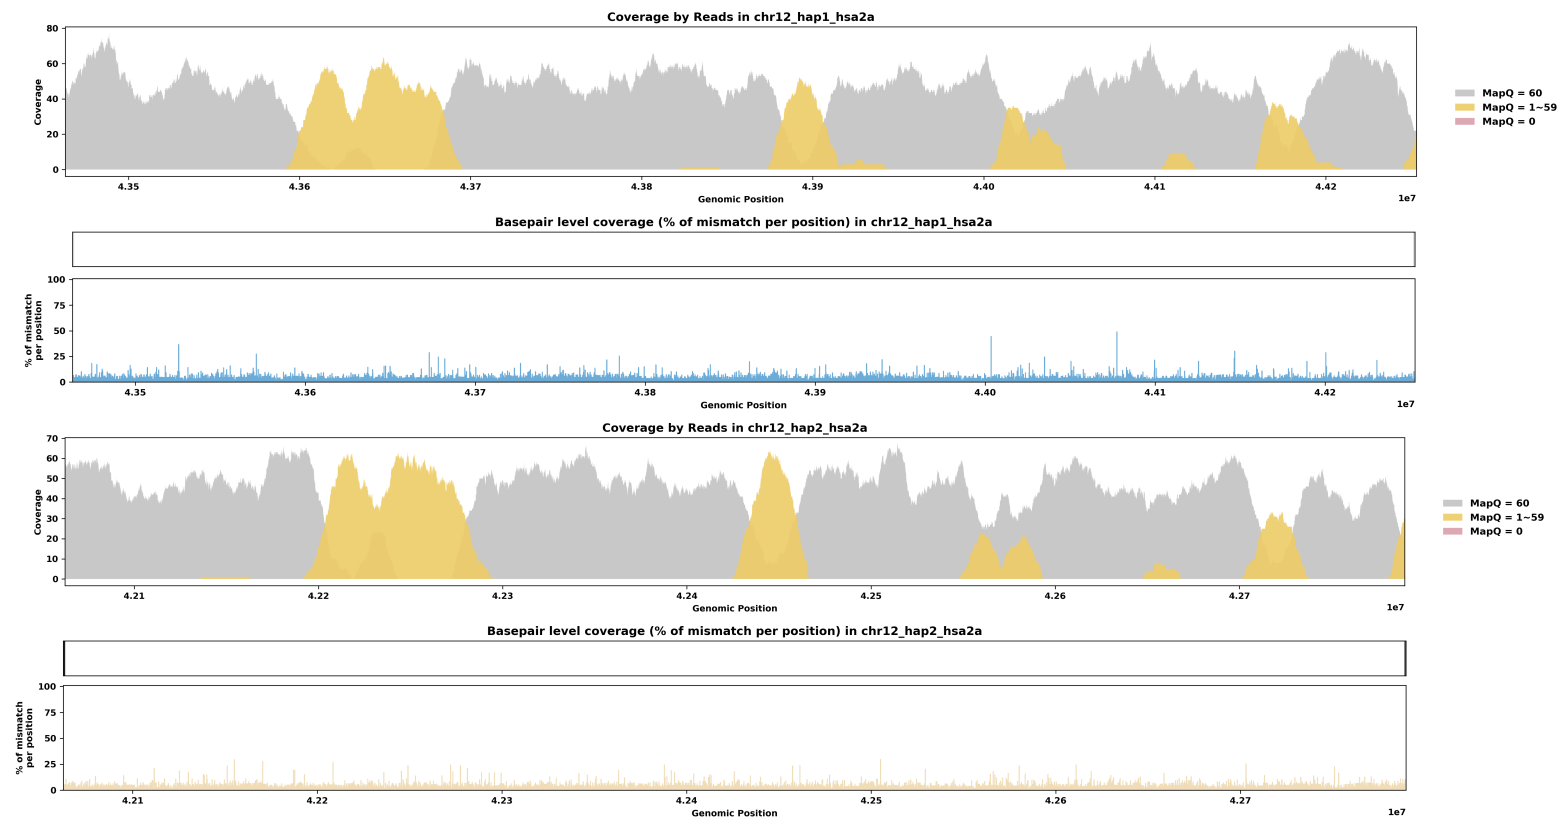

Species ID: mPonPyg2

Common Name: Bornean orangutan

Scientific Name: Pongo\_pygmaeus

Assembly Type: Haplotype Resolved

Data Source: T2T Primate

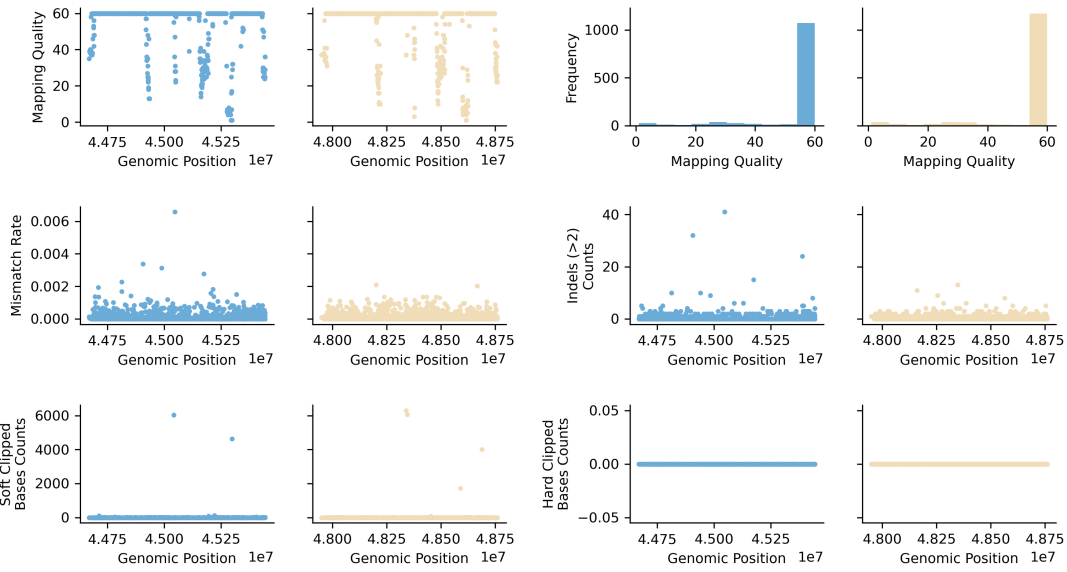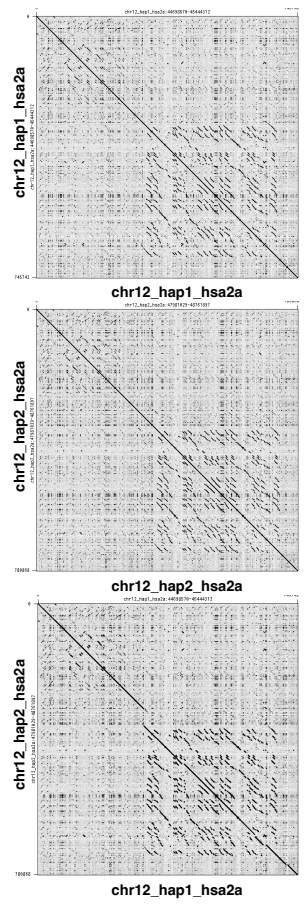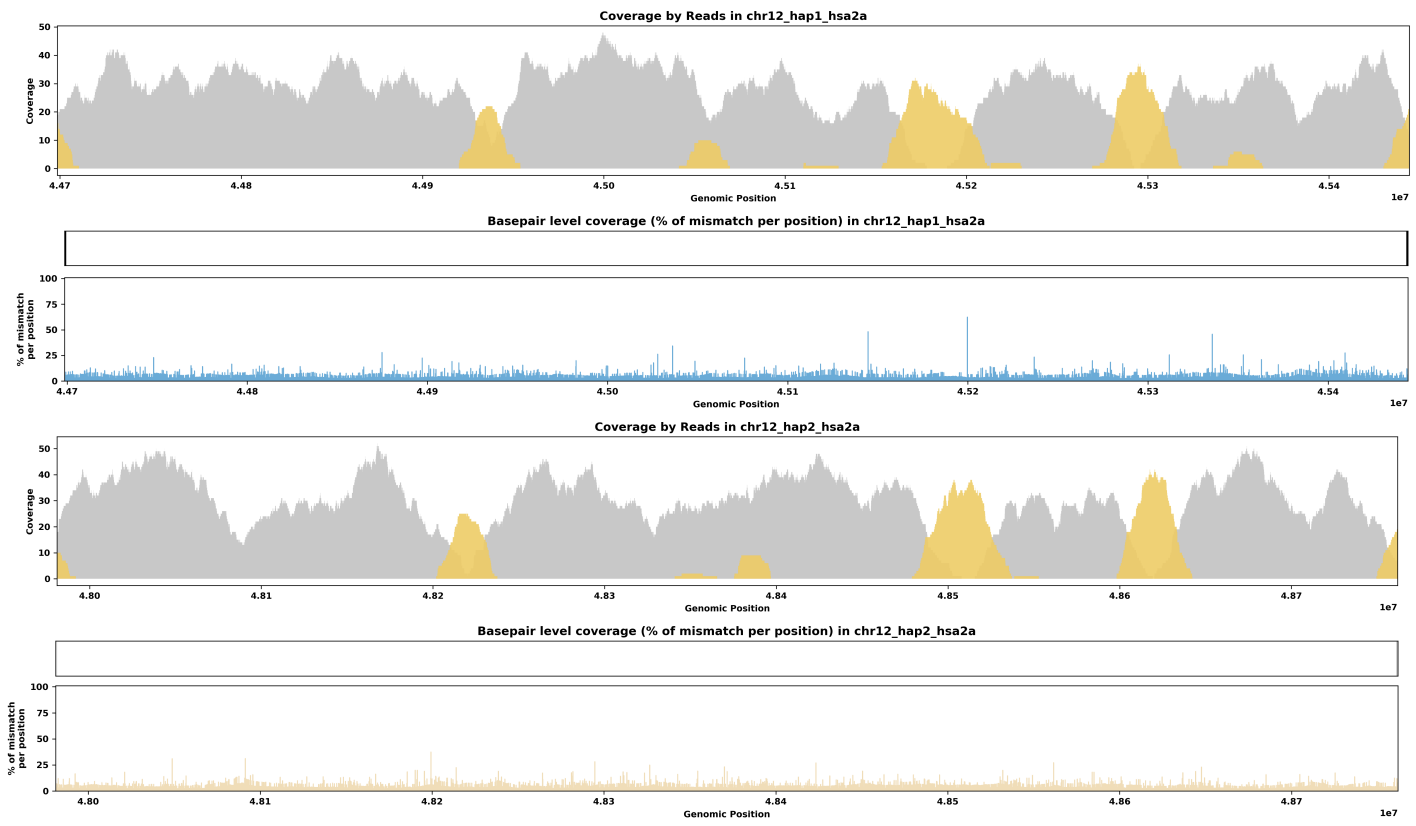

Species ID: mPseCra1

Common Name: false killer whale

Scientific Name: Pseudorca crassidens

Assembly Type: Haplotype Resolved

Data Source: VGP

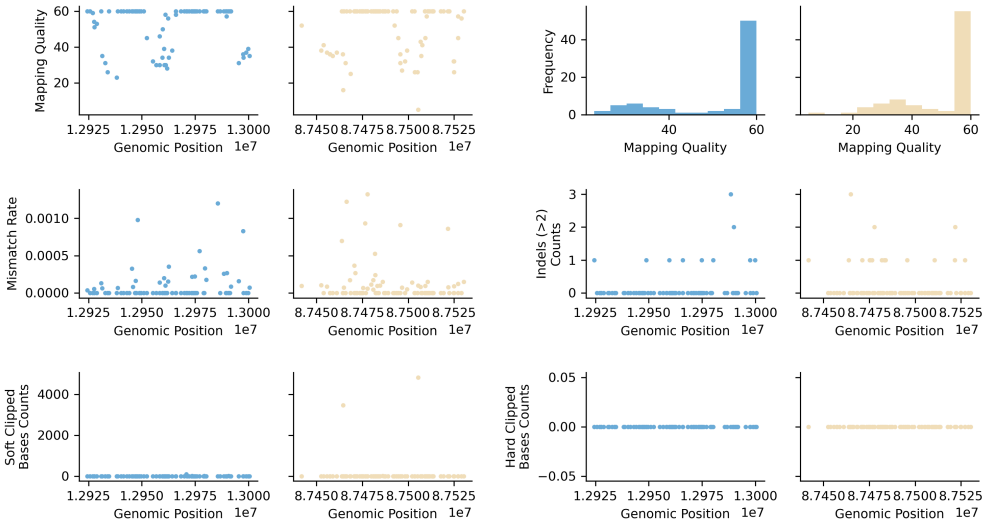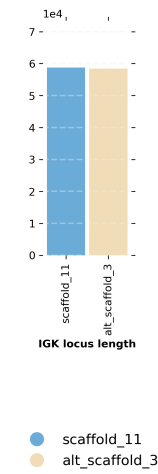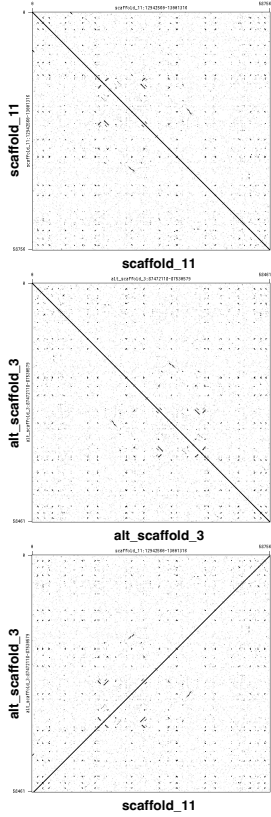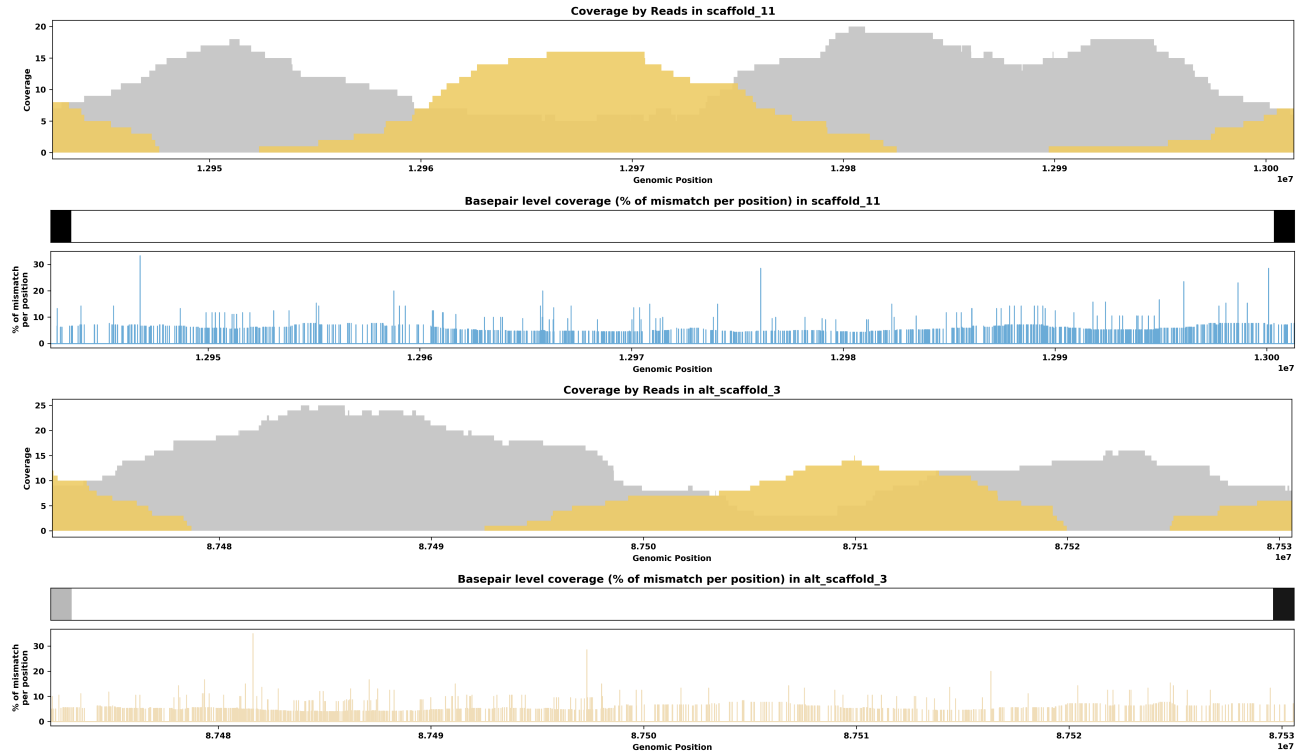

Species ID: mPumCon1  
 Common Name: Mountain Lion  
 Scientific Name: Puma concolor  
 Assembly Type: Haplotype Resolved  
 Data Source: CCGP

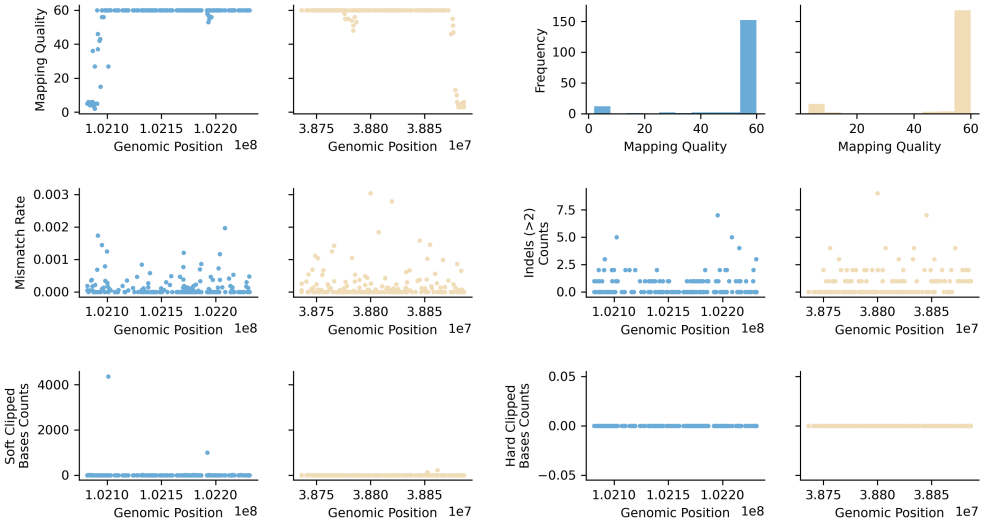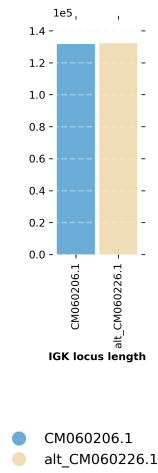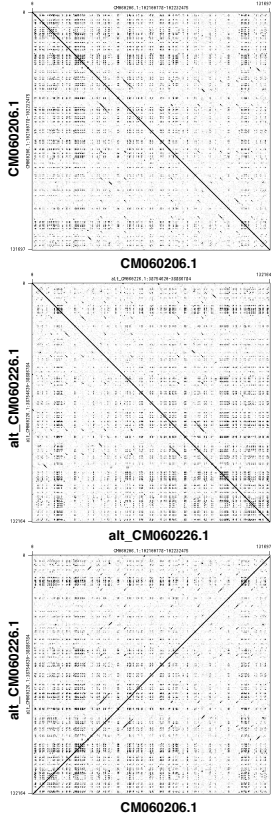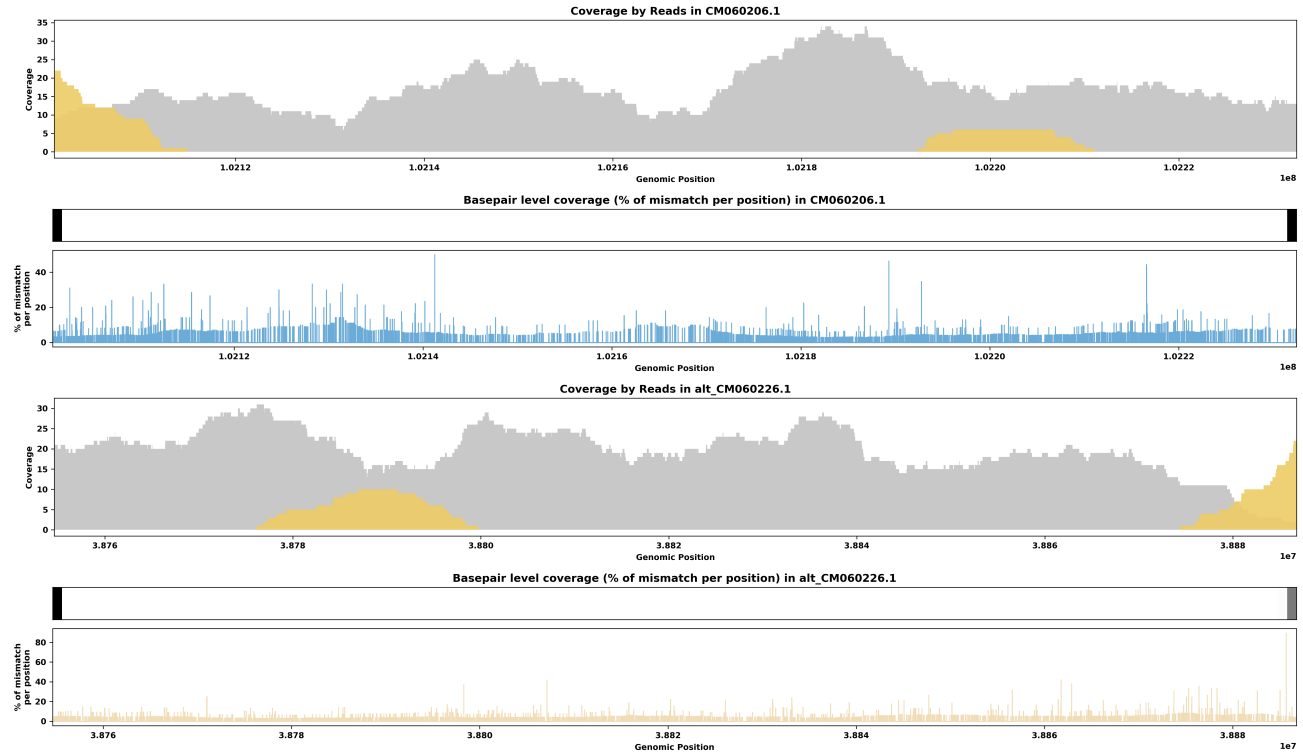



Species ID: mSorAra2  
 Common Name: Common shrew  
 Scientific Name: Sorex araneus  
 Assembly Type: Not Haplotype Resolved  
 Data Source: VGP

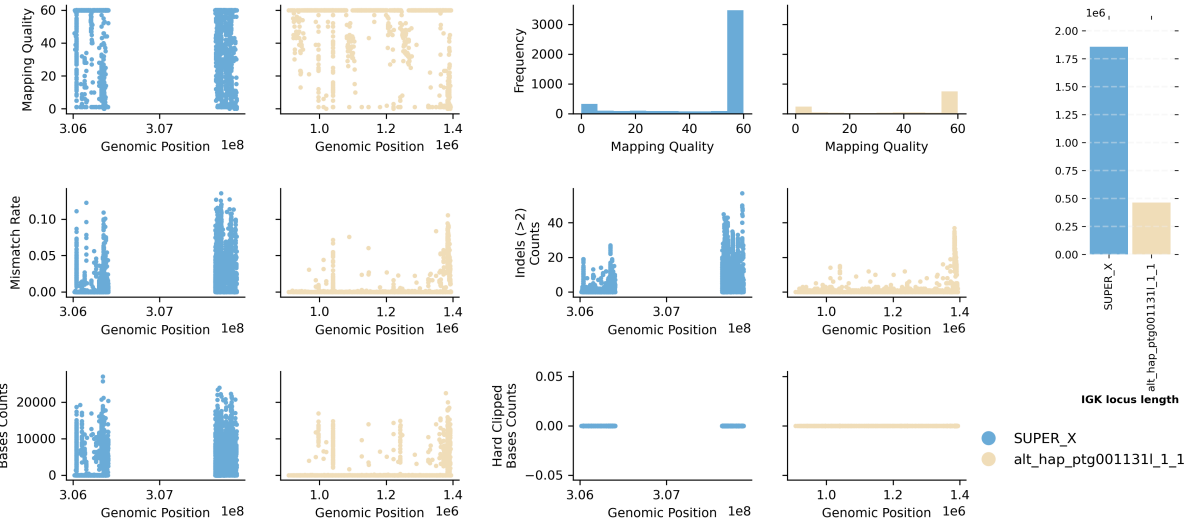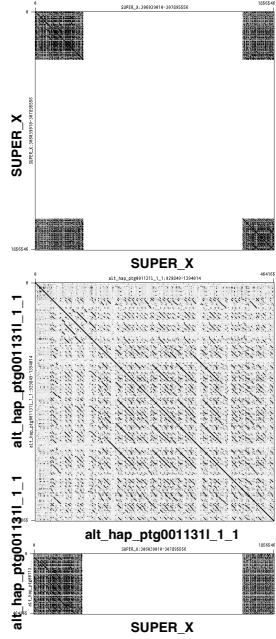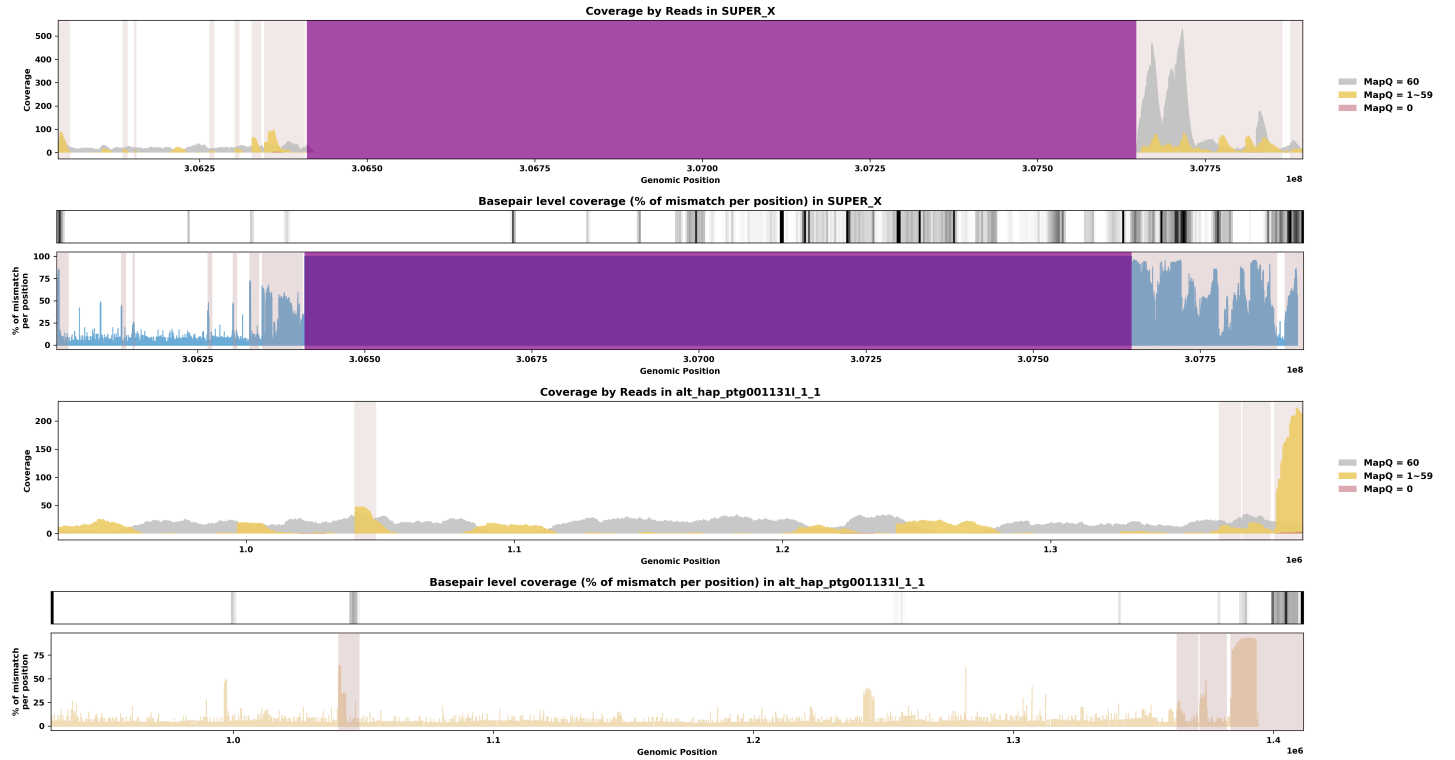

Species ID: mSteCoe1

Common Name: striped dolphin

Scientific Name: *Stenella coeruleoalba*

Assembly Type: Not Haplotype Resolved

Data Source: VGP

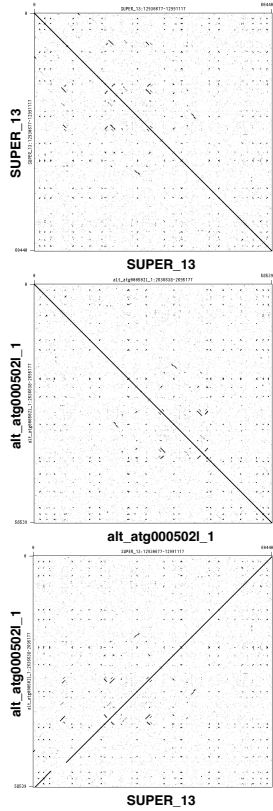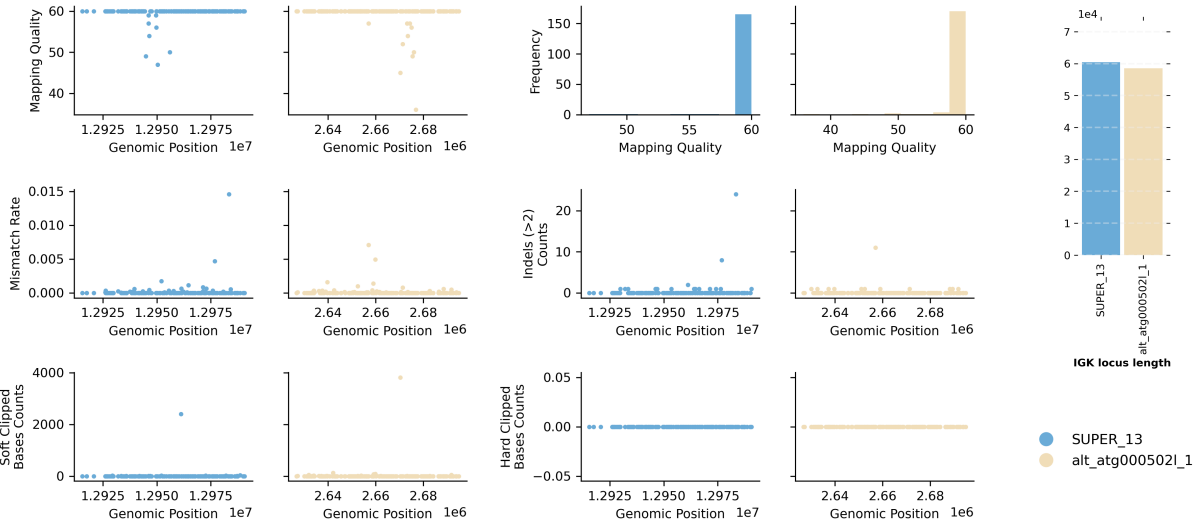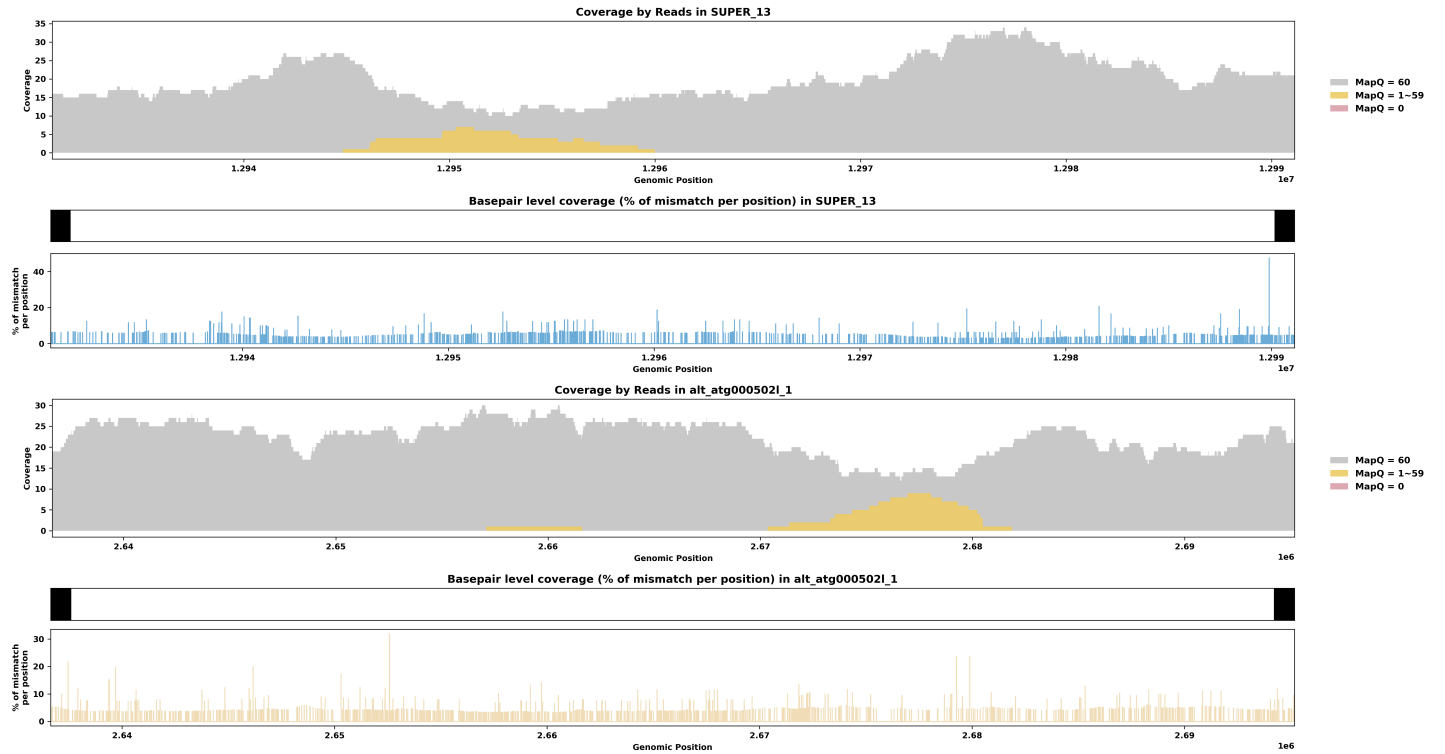

Species ID: mTalEur1

Common Name: European mole

Scientific Name: *Talpa europaea*

Assembly Type: Not Haplotype Resolved

Data Source: VGP

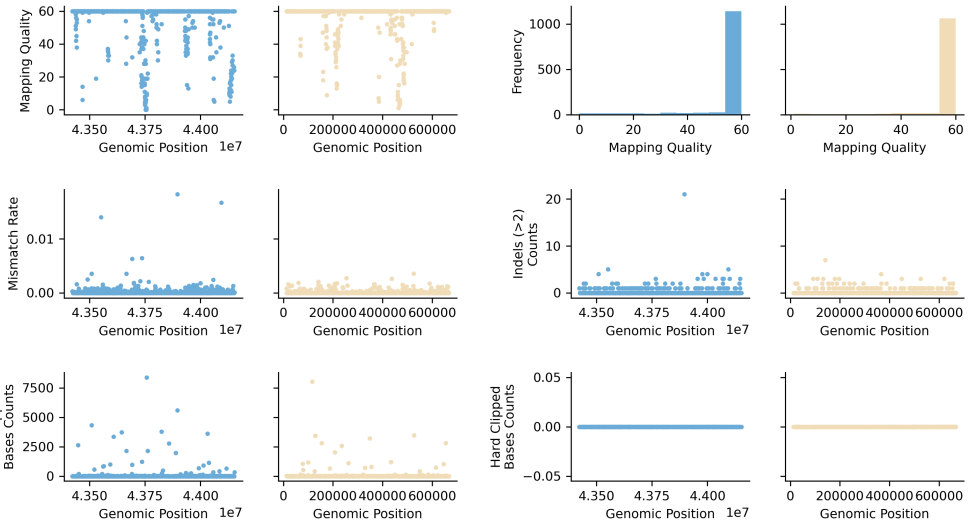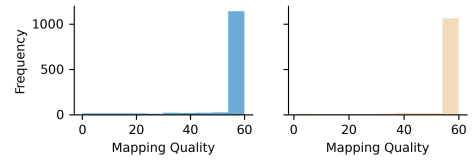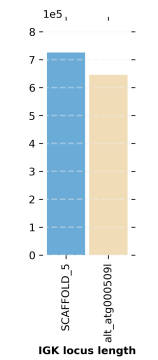

● SCAFFOLD\_5  
● alt\_atg0005091

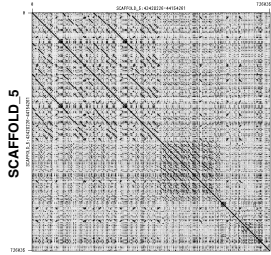

SCAFFOLD\_5

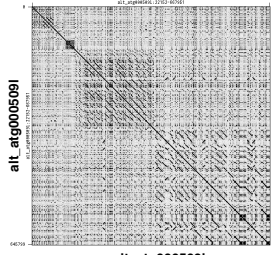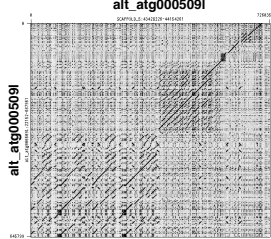

SCAFFOLD\_5

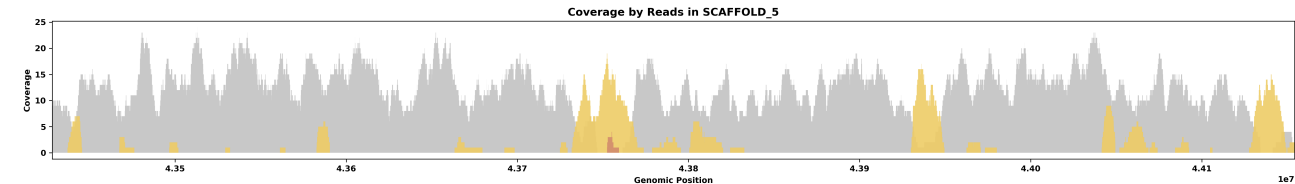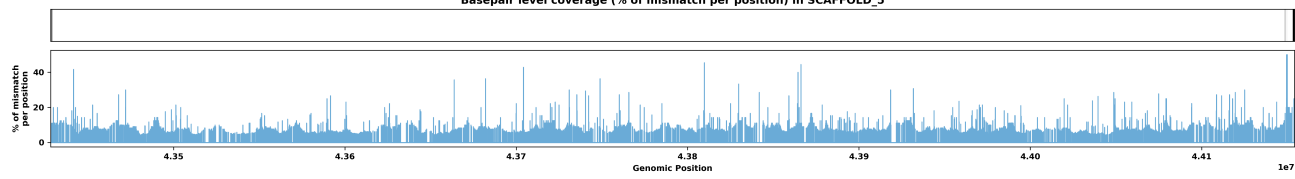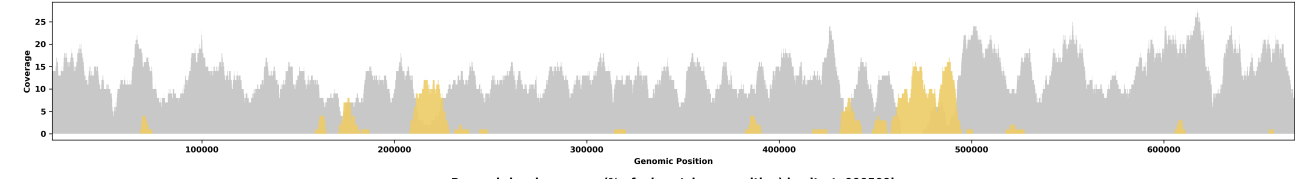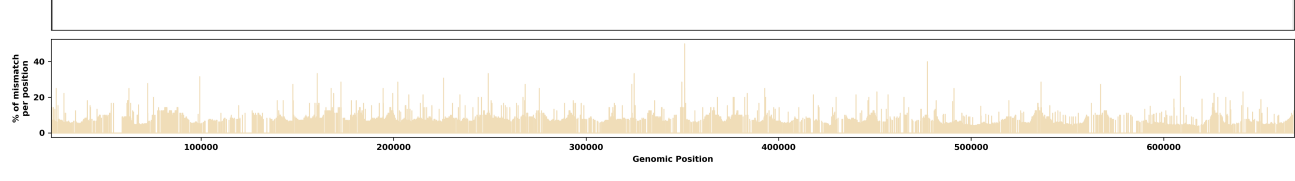

Species ID: mThoBot1  
 Common Name: Botta's pocket gopher  
 Scientific Name: Thomomys bottae  
 Assembly Type: Not Haplotype Resolved  
 Data Source: CCGP

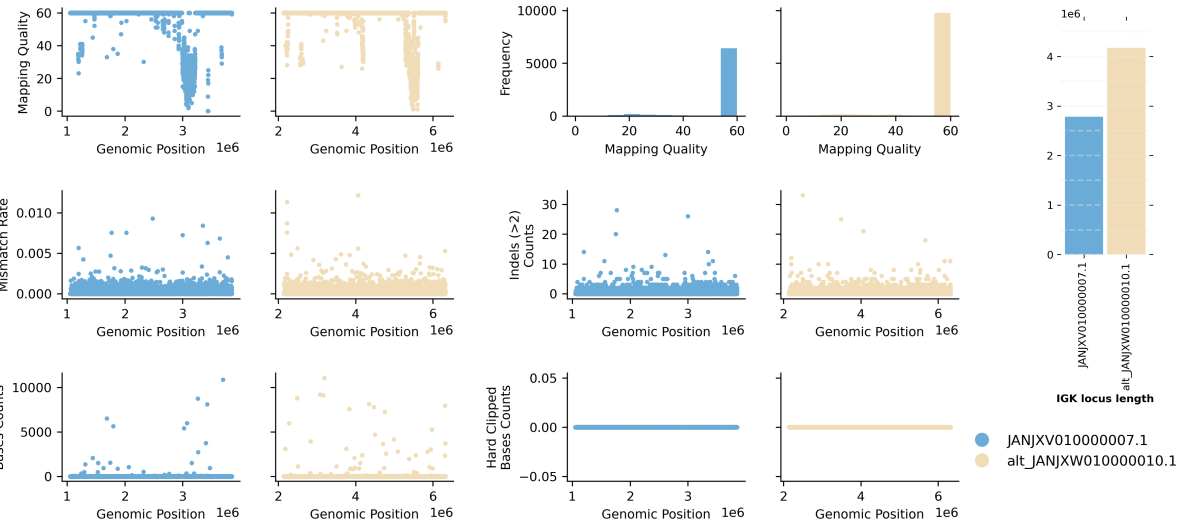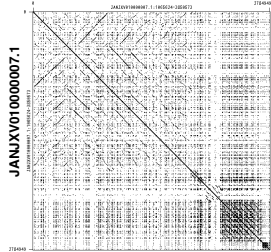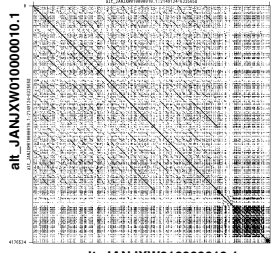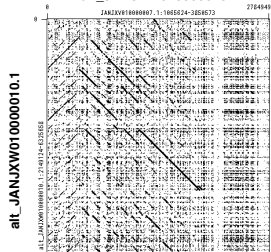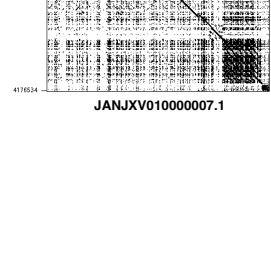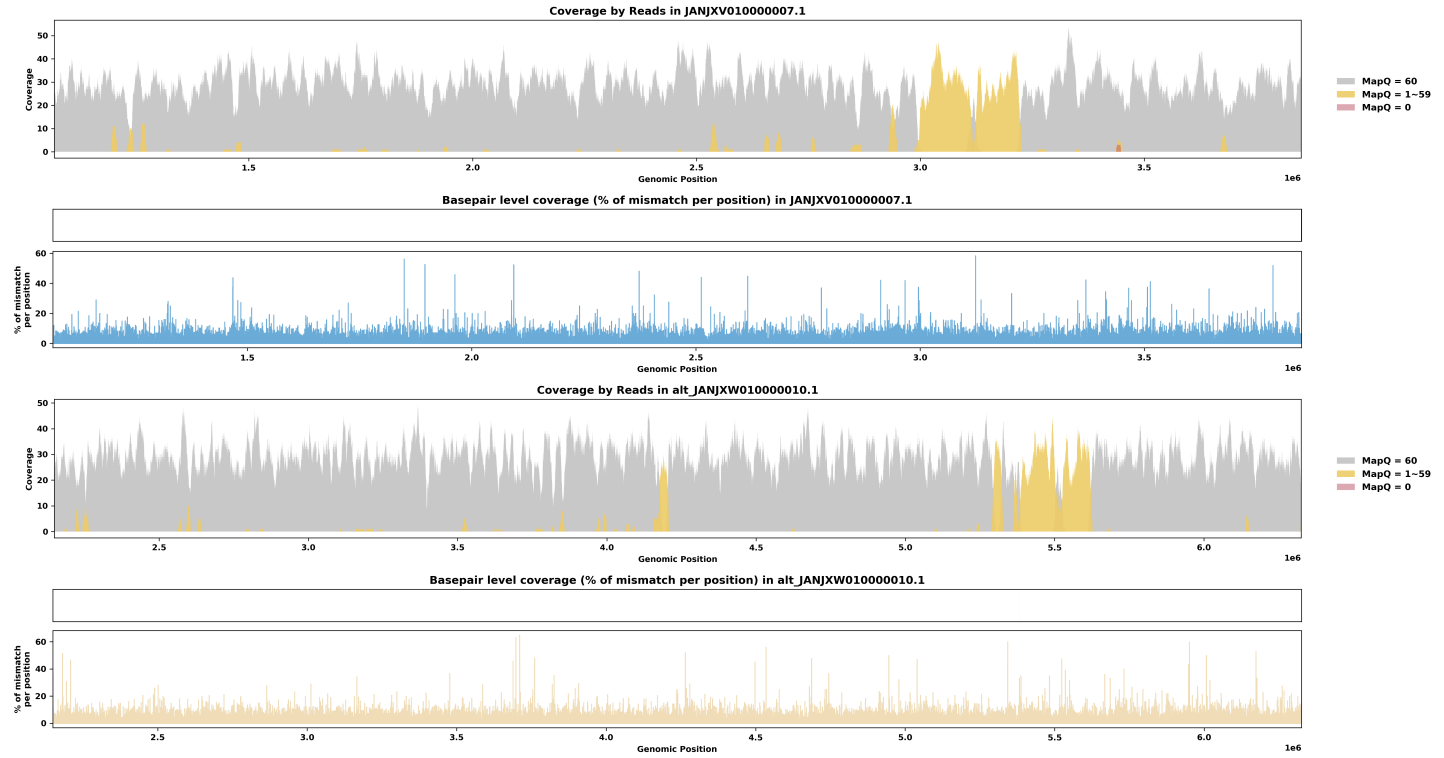

Species ID: mUrsAme1  
 Common Name: American black bear  
 Scientific Name: Ursus americanus  
 Assembly Type: Not Haplotype Resolved  
 Data Source: CCGP

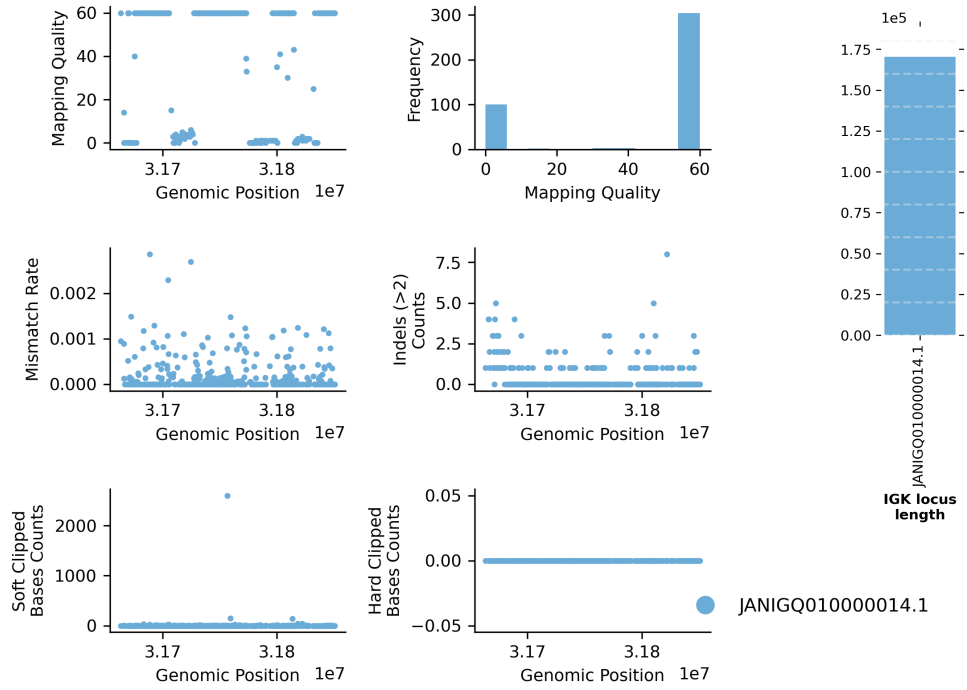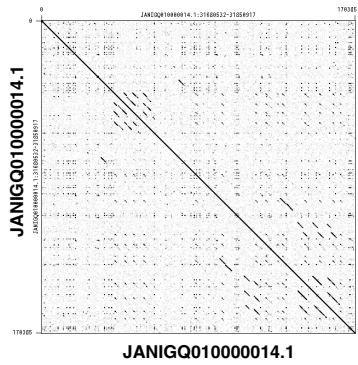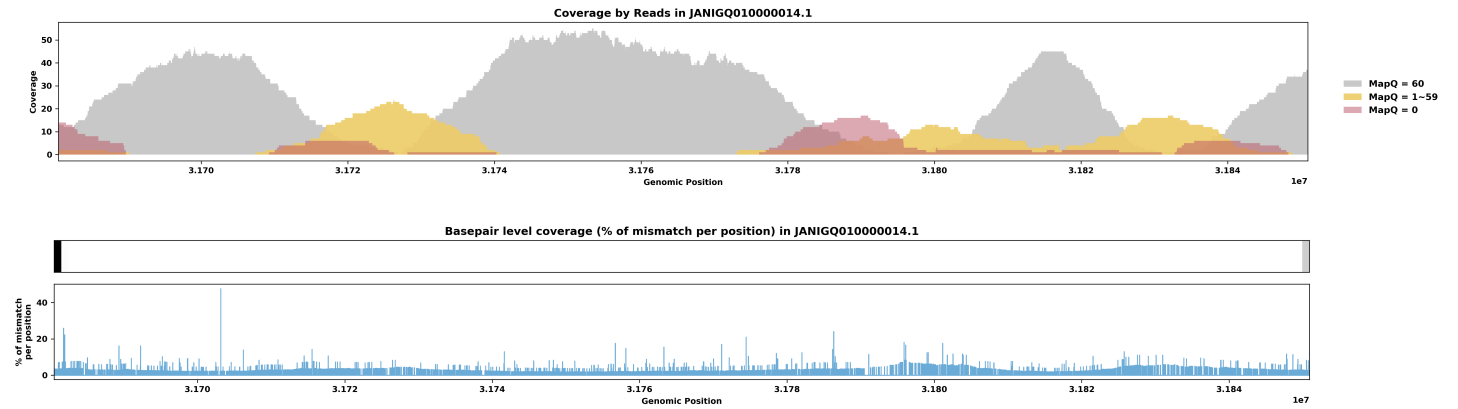

Species ID: mUrsArc2  
 Common Name: brown bear  
 Scientific Name: Ursus arctos  
 Assembly Type: Not Haplotype Resolved  
 Data Source: NCBI

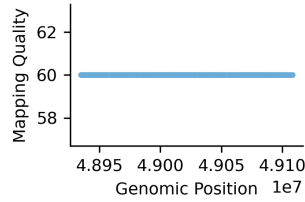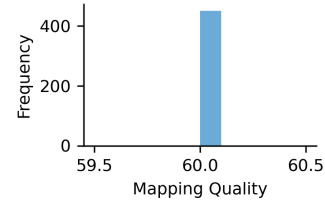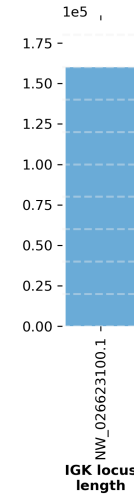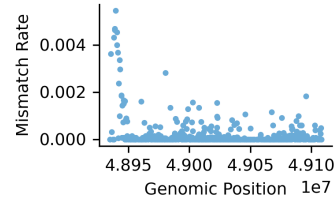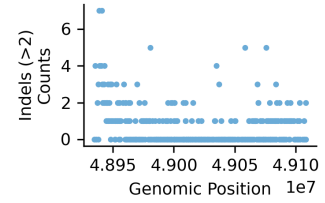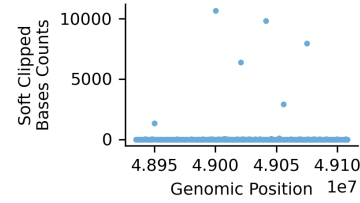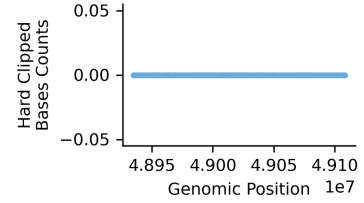

● NW\_026623100.1

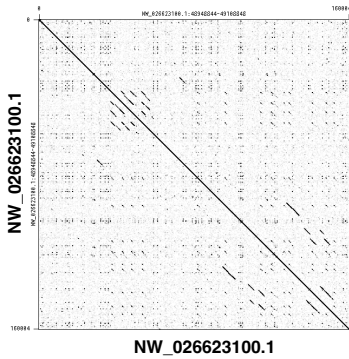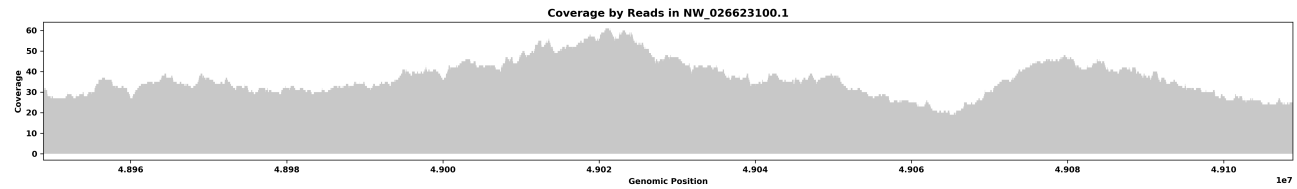

MapQ = 60  
 MapQ = 1-59  
 MapQ = 0

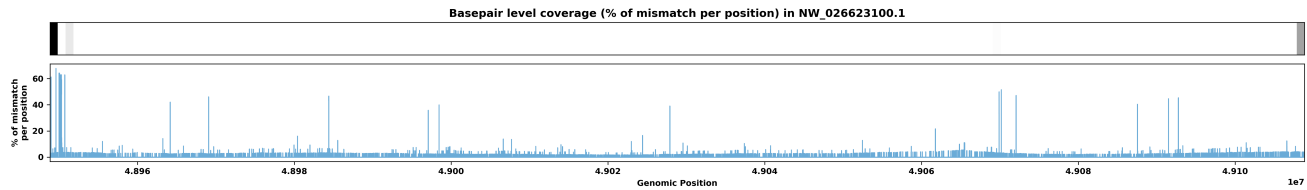

Species ID: rAllMis2  
 Common Name: American alligator  
 Scientific Name: Alligator mississippiensis  
 Assembly Type: Haplotype Resolved  
 Data Source: VGP

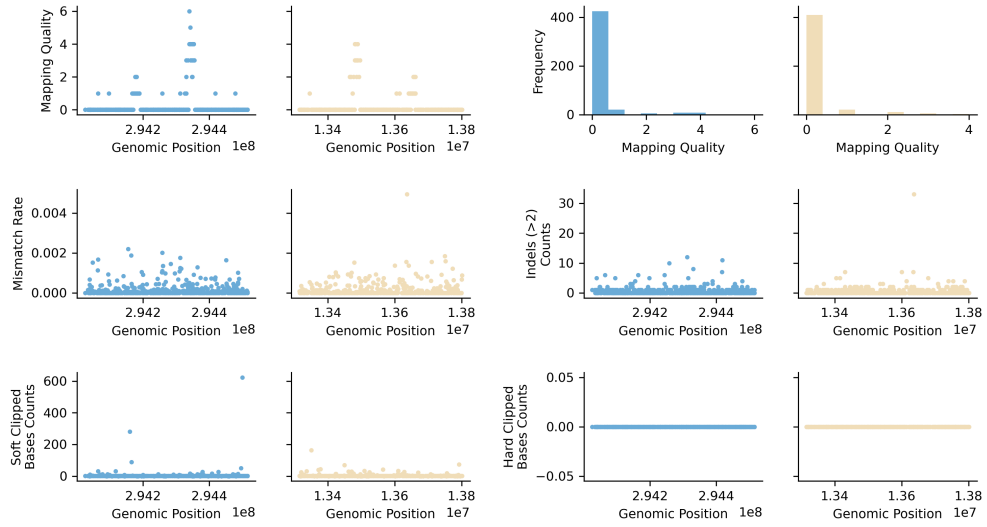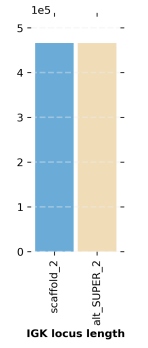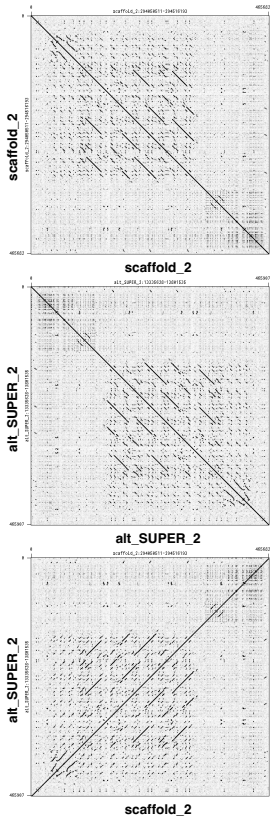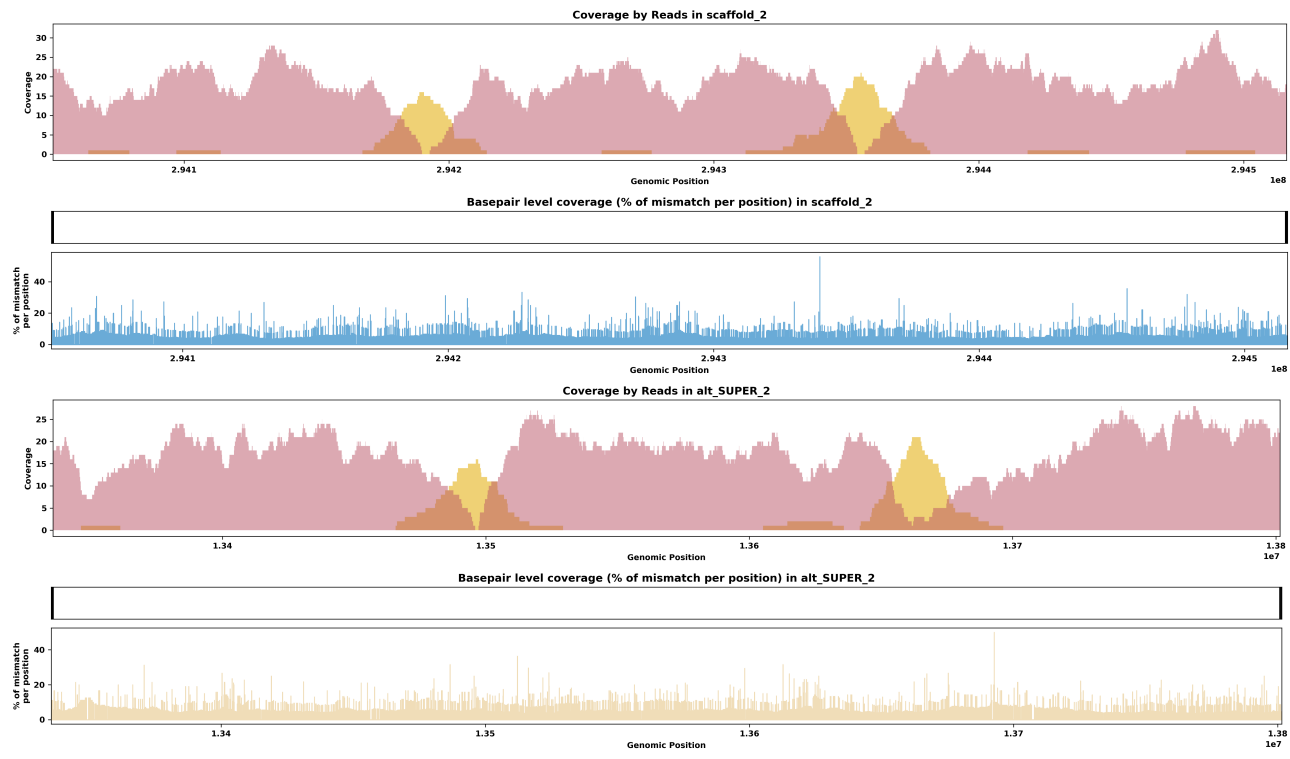

MapQ = 60  
 MapQ = 1-59  
 MapQ = 0

Species ID: rCarCar2  
 Common Name: Loggerhead turtle  
 Scientific Name: Caretta caretta  
 Assembly Type: Haplotype Resolved  
 Data Source: VGP

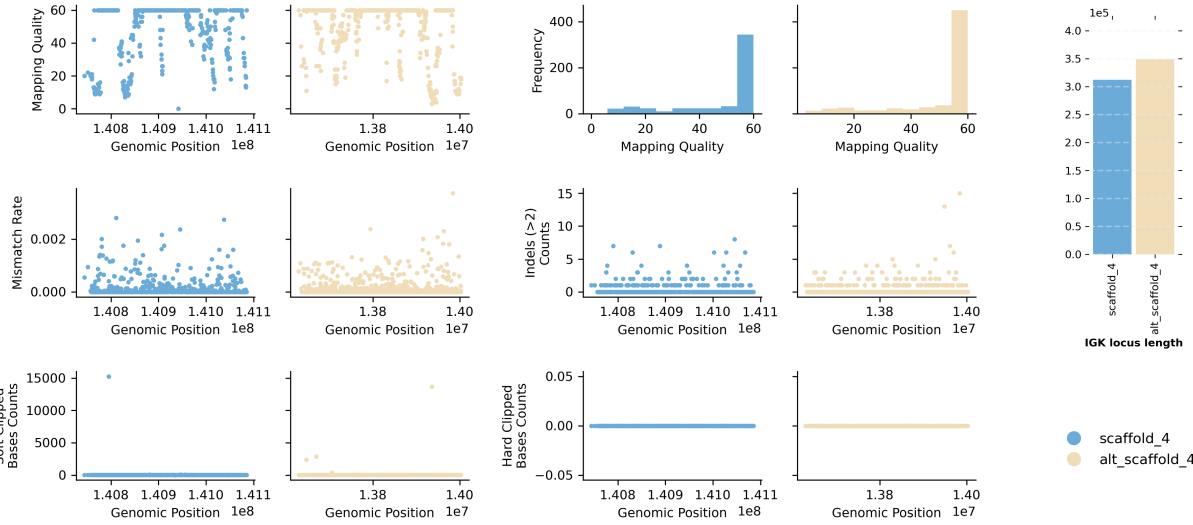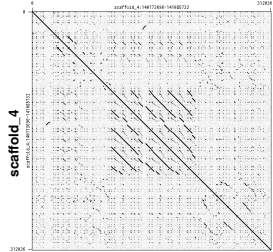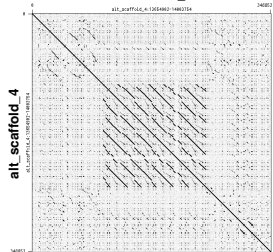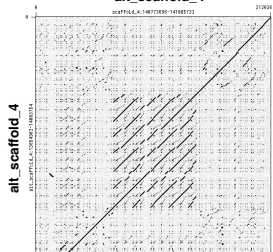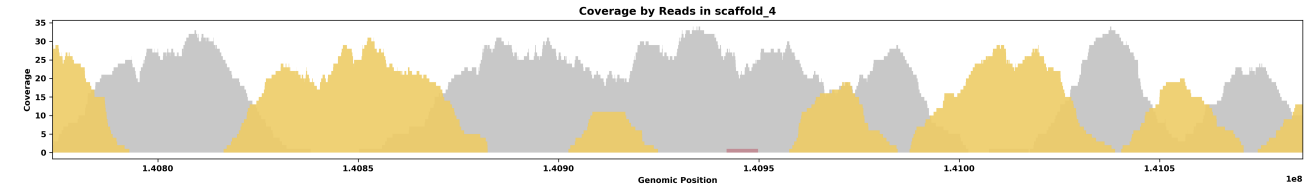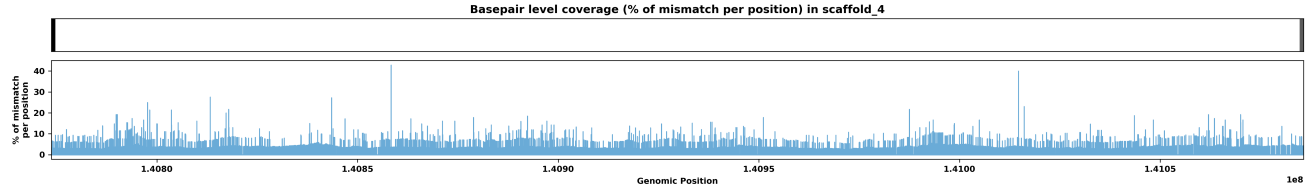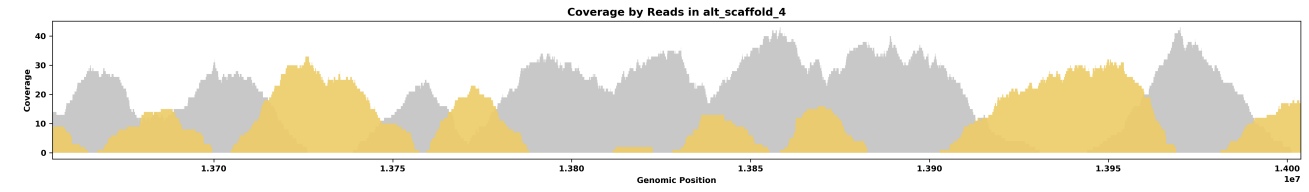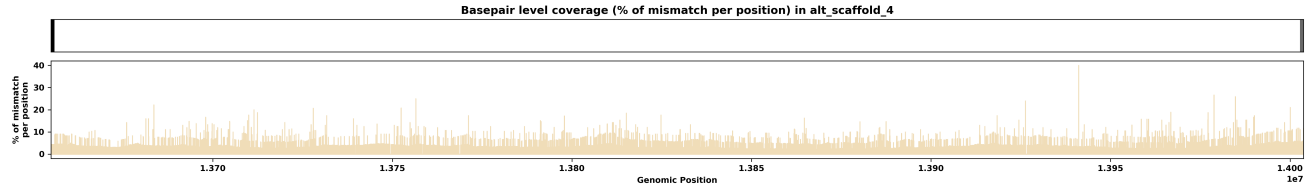



Species ID: rEmyOrb1  
 Common Name: European pond turtle  
 Scientific Name: *Emys orbicularis*  
 Assembly Type: Haplotype Resolved  
 Data Source: VGP

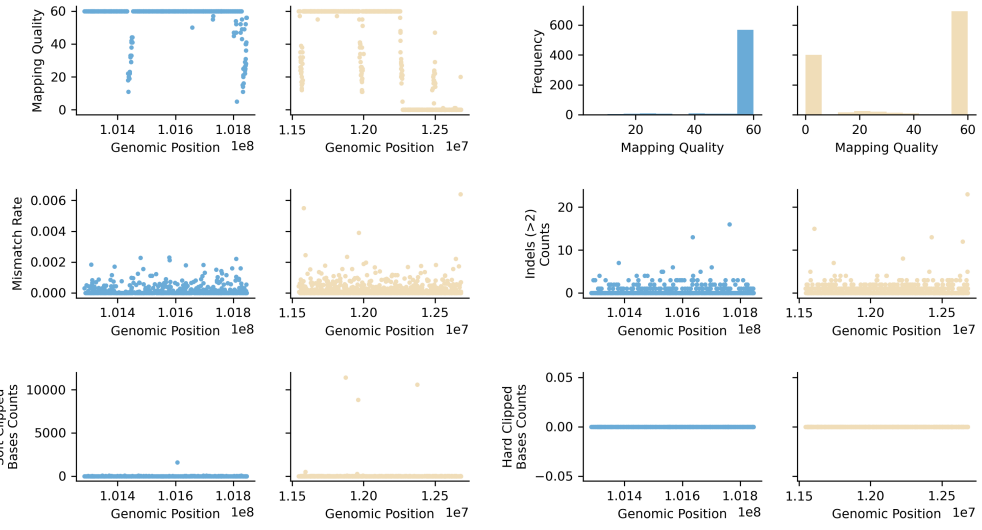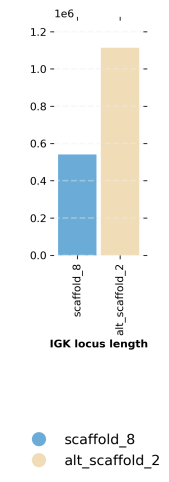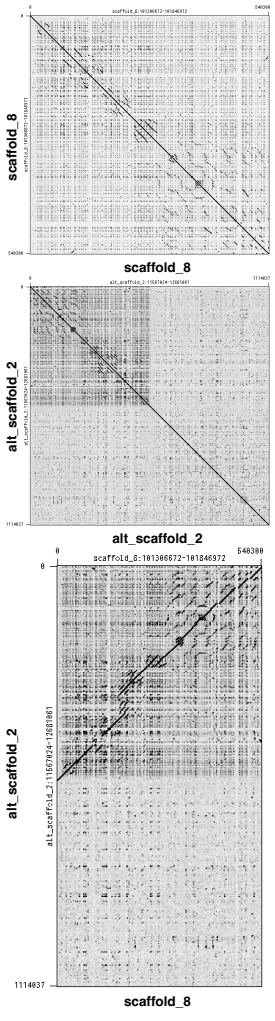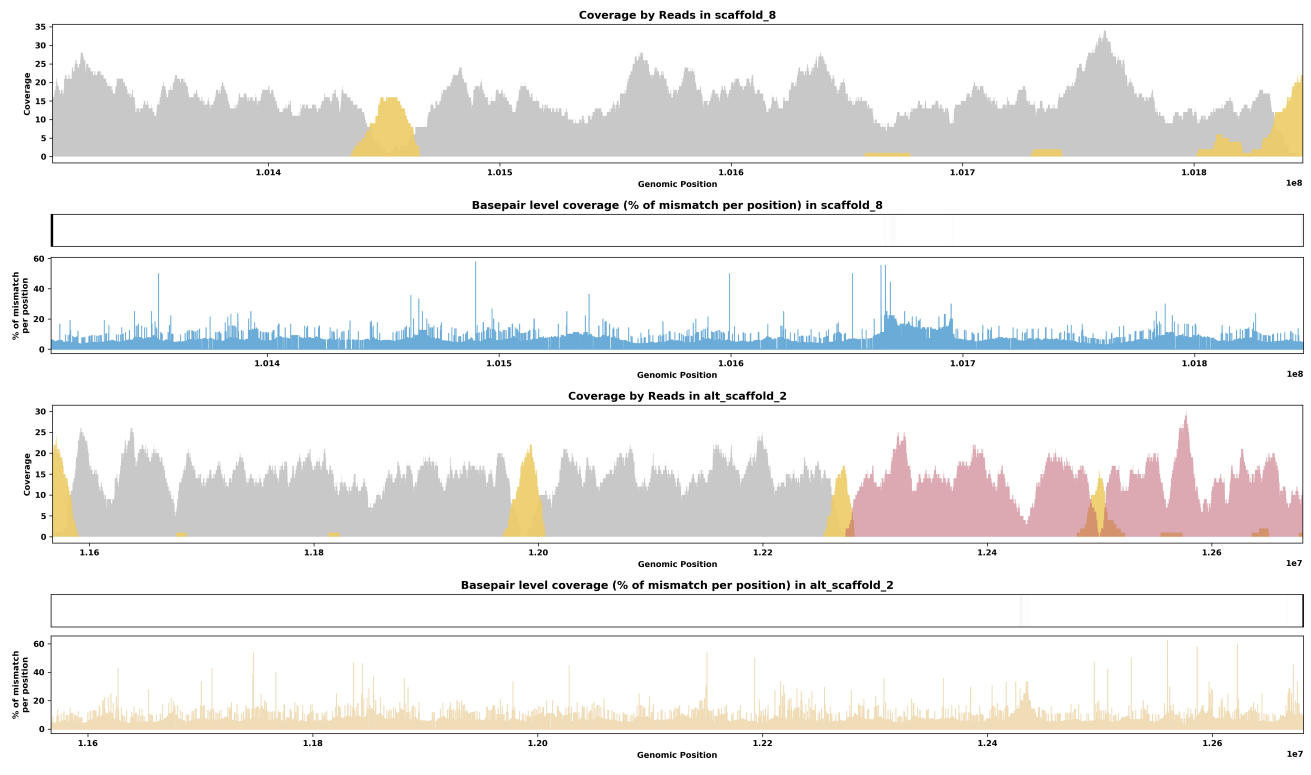

Species ID: rMaTer1

Common Name: diamondback terrapin

Scientific Name: Malaclemys terrapin

Assembly Type: Haplotype Resolved

Data Source: VGP

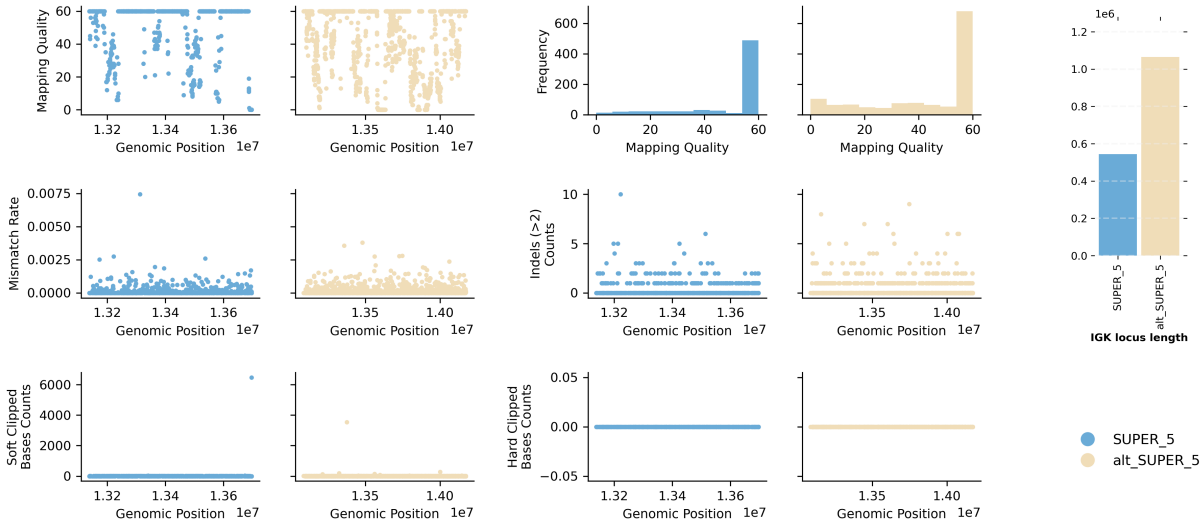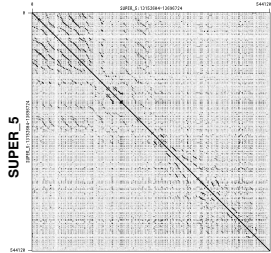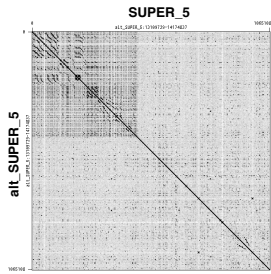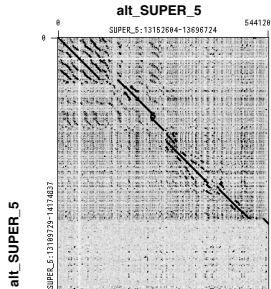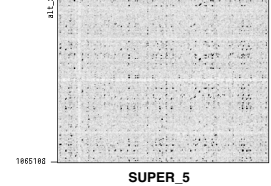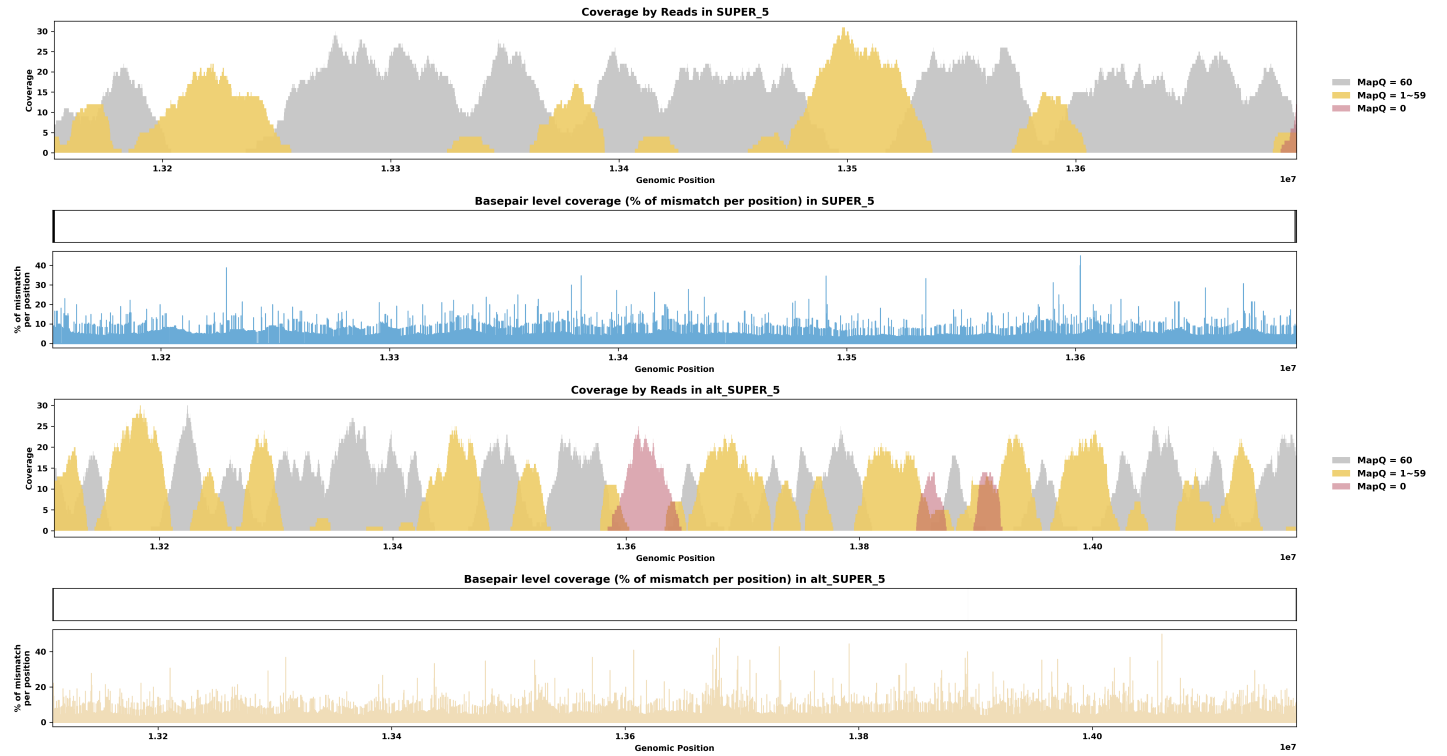

Supplement: media-3.pdf [file media-3.pdf]
