# Supplementary material
Source: PubMed Central journal article supplement (PMC11298965)

## Table of Contents

1. mApoSyl1 - *Apodemus sylvaticus* - Wood mouse
2. mBalAcu1 - *Balaenoptera acutorostrata* - Minke whale
3. mCamDro1 - *Camelus dromedarius* - Dromedary
4. mCanLor1 - *Canis lupus* - Greenland Wolf
5. mCanLor2 - *Canis lupus* - Greenland Wolf
6. mCerEla1 - *Cervus elaphus* - Red Deer
7. mCorTow1.0 - *Corynorhinus townsendii* - Townsend's Big-eared Bat
8. mCynVol1 - *Cynocephalus volans* - Philippine flying lemur
9. mDasNov1 - *Dasybus novemcinctus* - Nine-banded armadillo
10. mDelDel1 - *Delphinus delphis* - Saddleback dolphin
11. mDicBic1 - *Diceros bicornis* - Black rhinoceros
12. mEleMax1 - *Elephas maximus* - Asiatic Elephant
13. mEptNil1 - *Eptesicus nilssonii* - Northern bat
14. mEriEur2 - *Erinaceus europaeus* - Western European hedgehog
15. mEscRob2 - *Eschrichtius robustus* - Grey whale
16. mEubGla1 - *Eubalaena glacialis* - North Atlantic right whale
17. mGloMel1 - *Globicephala melas* - Long-finned pilot whale
18. mGorGor1 - *Gorilla gorilla* - Gorilla
19. mHetBru1 - *Heterohyrax brucei* - Yellow-spotted hyrax
20. mHipAmp2 - *Hippopotamus amphibius kiboko* - Hippopotamus
21. mHypAmp2 - *Hyperoodon ampullatus* - Northern bottlenose whale
22. mLagAlb1 - *Lagenorhynchus albirostris* - White-beaked dolphin
23. mLemCat1 - *Lemur catta* - Ring-tailed lemur
24. mLynRuf1 - *Lynx rufus* - Bobcat
25. mMacEug1 - *Macropus eugenii* - Tammar wallaby
26. mManPen7 - *Manis pentadactyla* - Chinese pangolin
27. mMarMar1 - *Martes martes* - European pine marten
28. mMelMel3 - *Meles meles* - European badger
29. mMesDen1 - *Mesoplodon densirostris* - Blainville's beaked whale
30. mMicCal1.0 - *Microtus californicus* - California Vole
31. mMicMin1 - *Micromys minutus* - European harvest mouse
32. mMirAng1 - *Mirounga angustirostris* - Northern Elephant Seal
33. mMonDom1 - *Monodelphis domestica* - Gray short-tailed opossum
34. mMunRee1 - *Muntiacus reevesi* - Reeves' muntjac
35. mMusAve1 - *Muscardinus avellanarius* - Hazel dormouse
36. mMusLut2 - *Mustela lutreola* - European mink
37. mMusNiv1 - *Mustela nivalis* - Least weasel
38. mMyoDau2 - *Myotis daubentonii* - Daubenton's bat
39. mMyoYum1.0 - *Myotis yumanensis* - Yuma myotis
40. mNeoNeb1 - *Neofelis nebulosa* - Clouded Leopard
41. mNycCou1 - *Nycticebus coucang* - Slow loris
42. mOrcOrc1 - *Orcinus orca* - Killer whale
43. mOryCun1 - *Oryctolagus cuniculus* - Rabbit
44. mPanPan1 - *Pan paniscus* - Bonobo
45. mPerMan1 - *Peromyscus maniculatus* - Deer mouse
46. mPhoPho1 - *Phocoena phocoena* - Harbor porpoise
47. mPipPyg2 - *Pipistrellus pygmaeus* - Soprano pipistrelle
48. mPonAbe1 - *Pongo abelii* - Sumatran orangutan
49. mPonPyg2 - *Pongo pygmaeus* - Bornean orangutan
50. mPseCra1 - *Pseudorca crassidens* - False killer whale
51. mPumCon1.1 - *Puma concolor* - Mountain Lion
52. mSorAra2/1 - *Sorex araneus* - Common shrew
53. mSteCoe1 - *Stenella coeruleoalba* - Striped dolphin
54. mTalEur1 - *Talpa europaea* - European mole
55. mUrsAme1 - *Ursus americanus* - American black bear
56. mUrsArc2 - *Ursus arctos* - Brown bear
57. mVesMur1 - *Vespertilio murinus* - Particolored bat
58. rAllMis2 - *Alligator mississippiensis* - American alligator
59. rCarCar2 - *Caretta caretta* - Loggerhead turtle
60. rEmyOrb1 - *Emys orbicularis* - European pond turtle
61. rMalTer1 - *Malaclemys terrapin* - Diamondback terrapin

Note: This supplementary material only displays alternate IG loci if they are longer than one-quarter of the corresponding primary IG locus length. Loci shorter than this threshold are typically too fragmented to be shown. 18 species had alternate IGL loci shorter than this threshold and are not shown.

Species ID: mApoSyl1

Common Name: wood mouse

Scientific Name: Apodemus sylvaticus

Assembly Type: Not Haplotype Resolved

Data Source: VGP

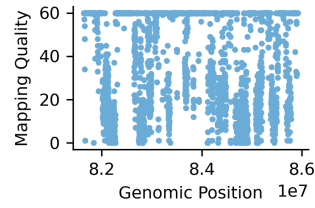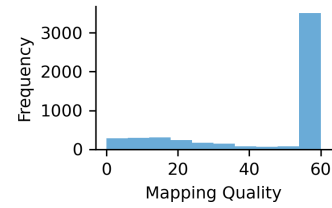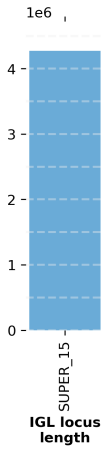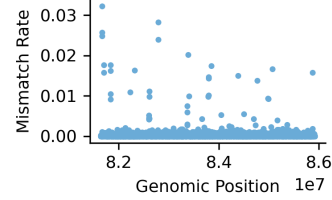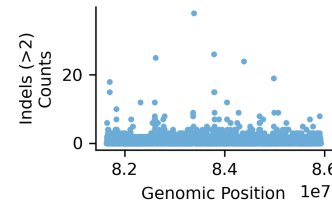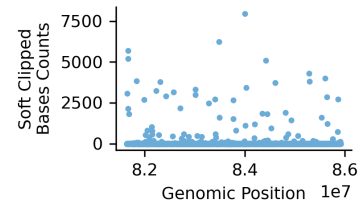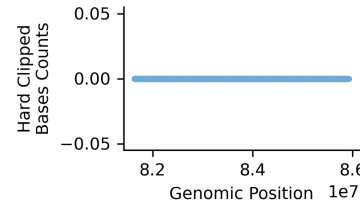

● SUPER\_15

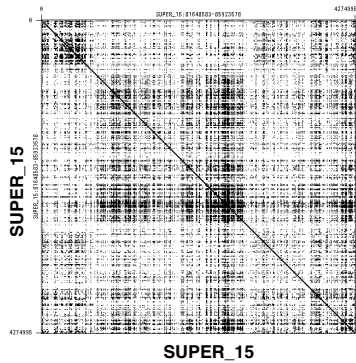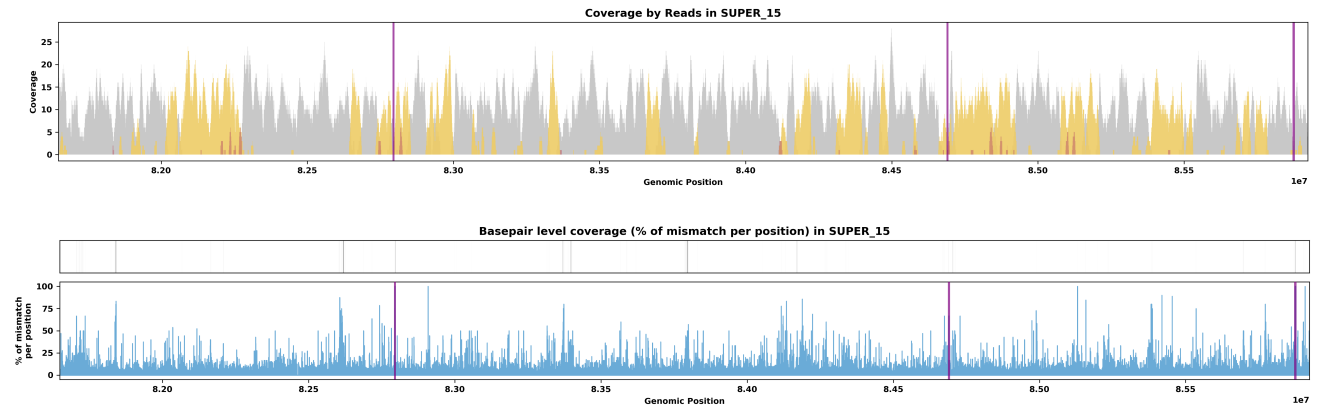

Species ID: mBalAcu1  
 Common Name: minke whale  
 Scientific Name: Balaenoptera\_acutorostrata  
 Assembly Type: Not Haplotype Resolved  
 Data Source: VGP

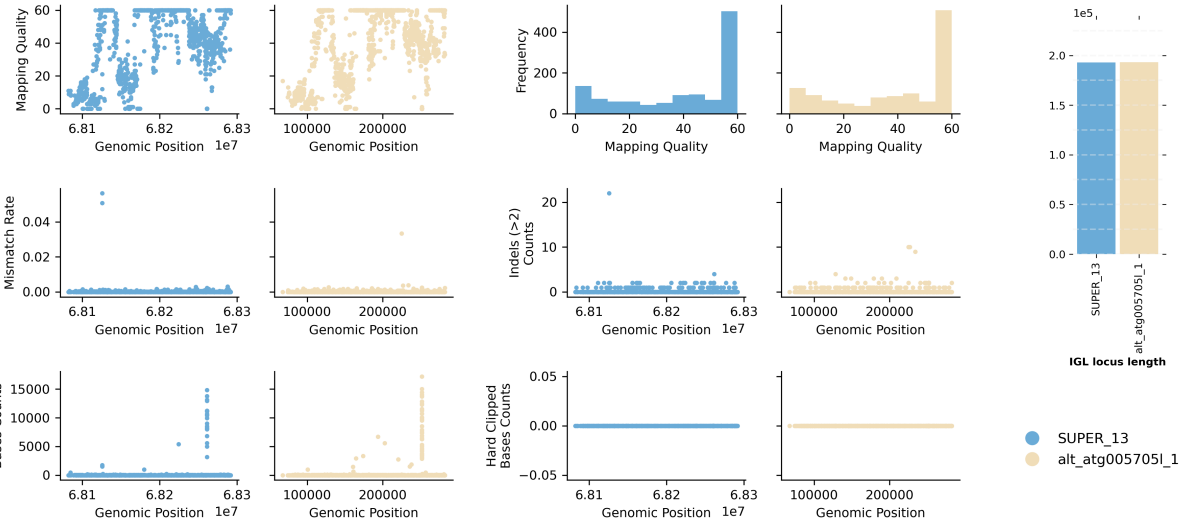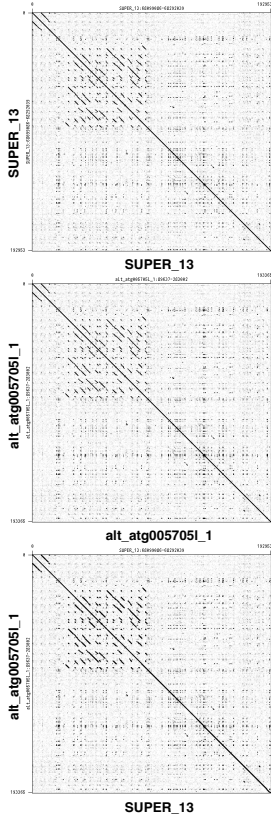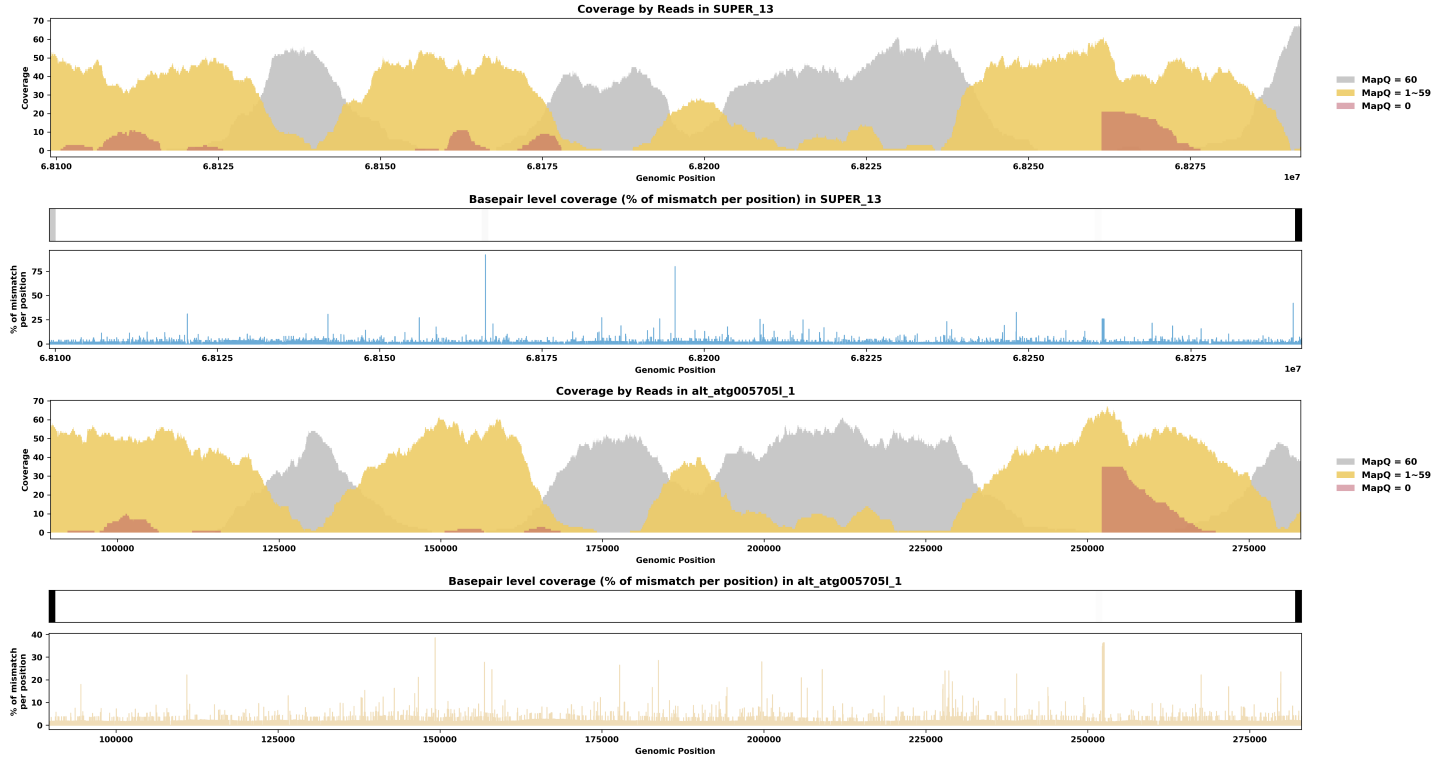

Species ID: mCamDro1  
 Common Name: dromedary  
 Scientific Name: Camelus dromedarius  
 Assembly Type: Haplotype Resolved  
 Data Source: VGP

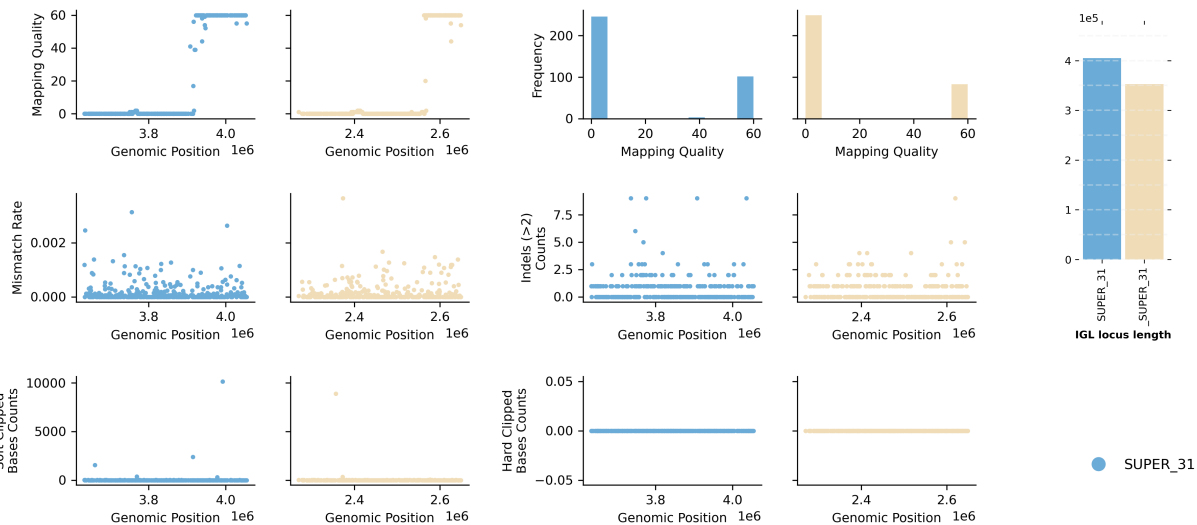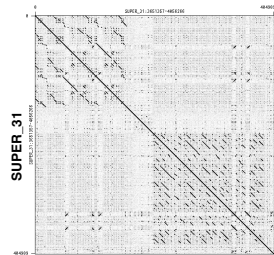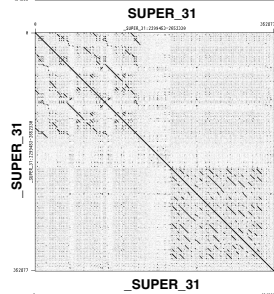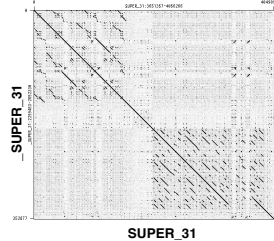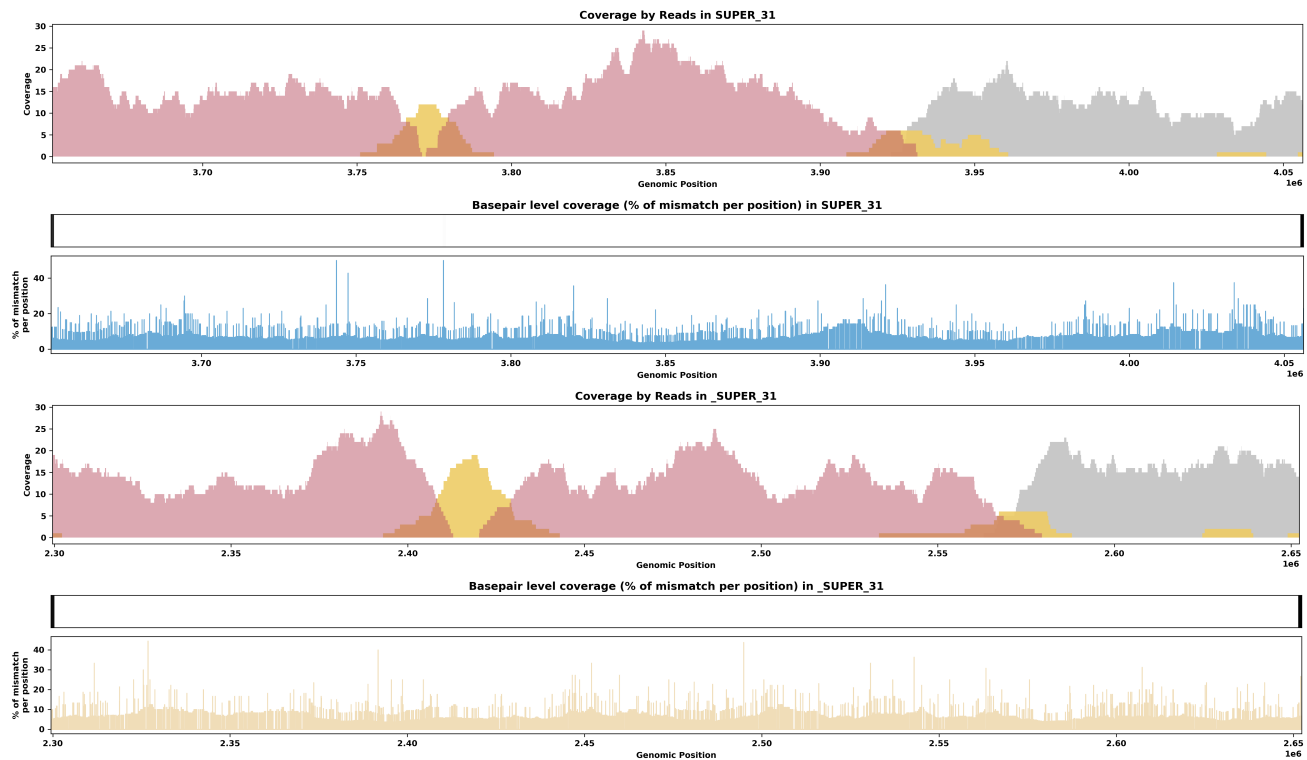

Species ID: mCanLor1  
 Common Name: Greenland Wolf  
 Scientific Name: Canis\_lupus  
 Assembly Type: Not Haplotype Resolved  
 Data Source: VGP

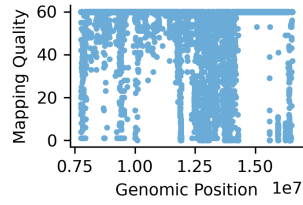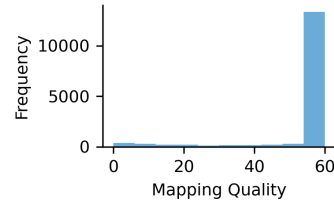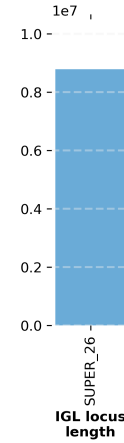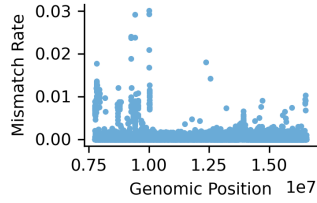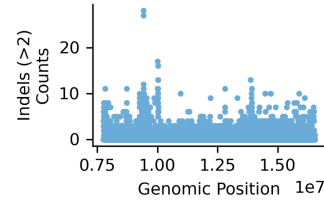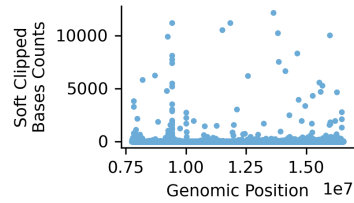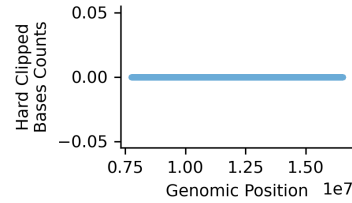

● SUPER\_26

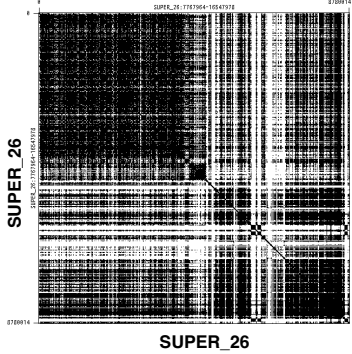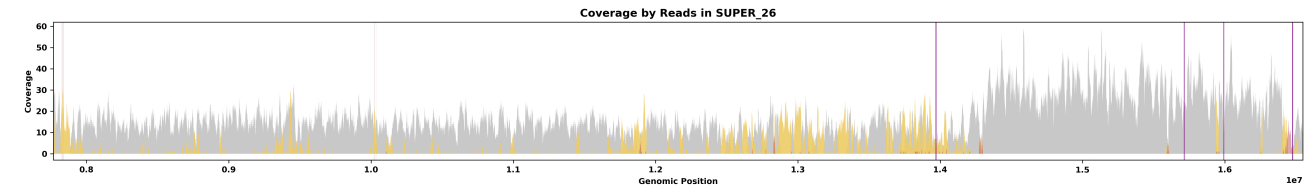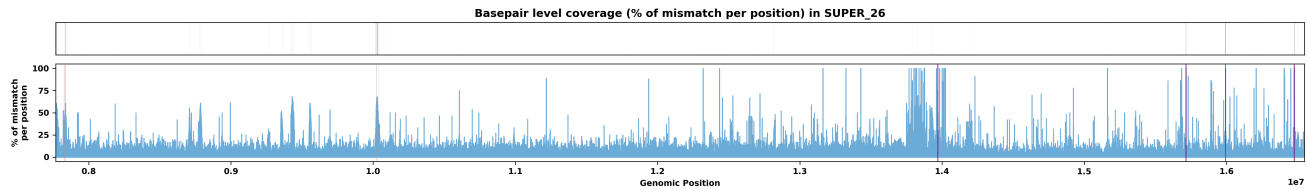

Species ID: mCanLor2  
 Common Name: Greenland Wolf  
 Scientific Name: *Canis lupus*  
 Assembly Type: Haplotype Resolved  
 Data Source: VGP

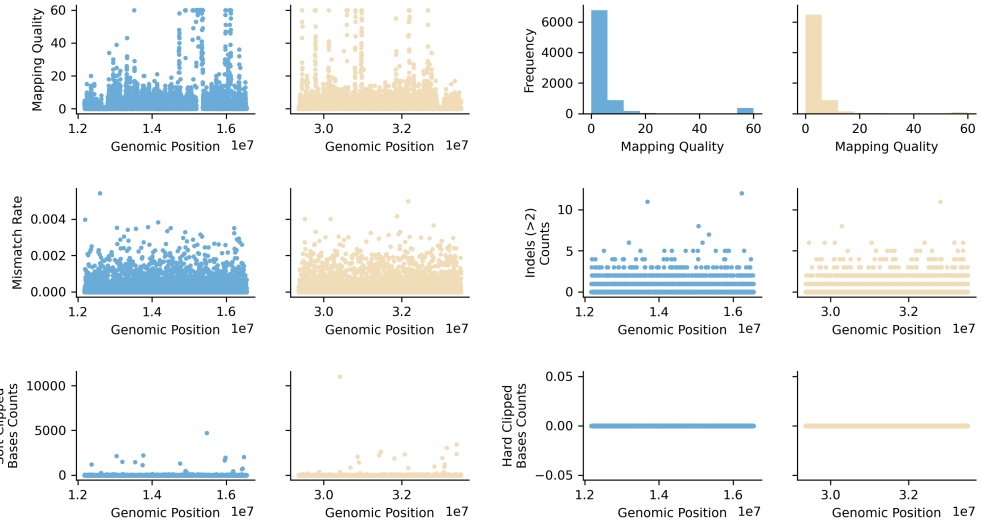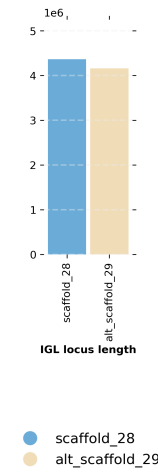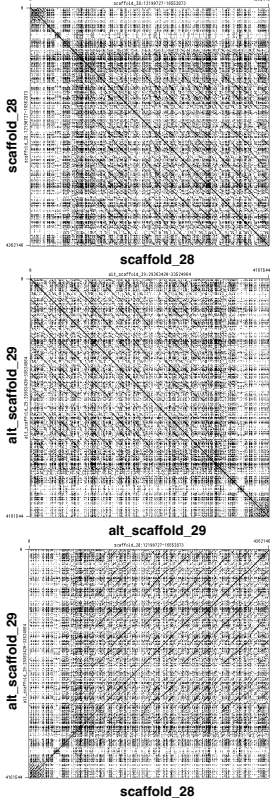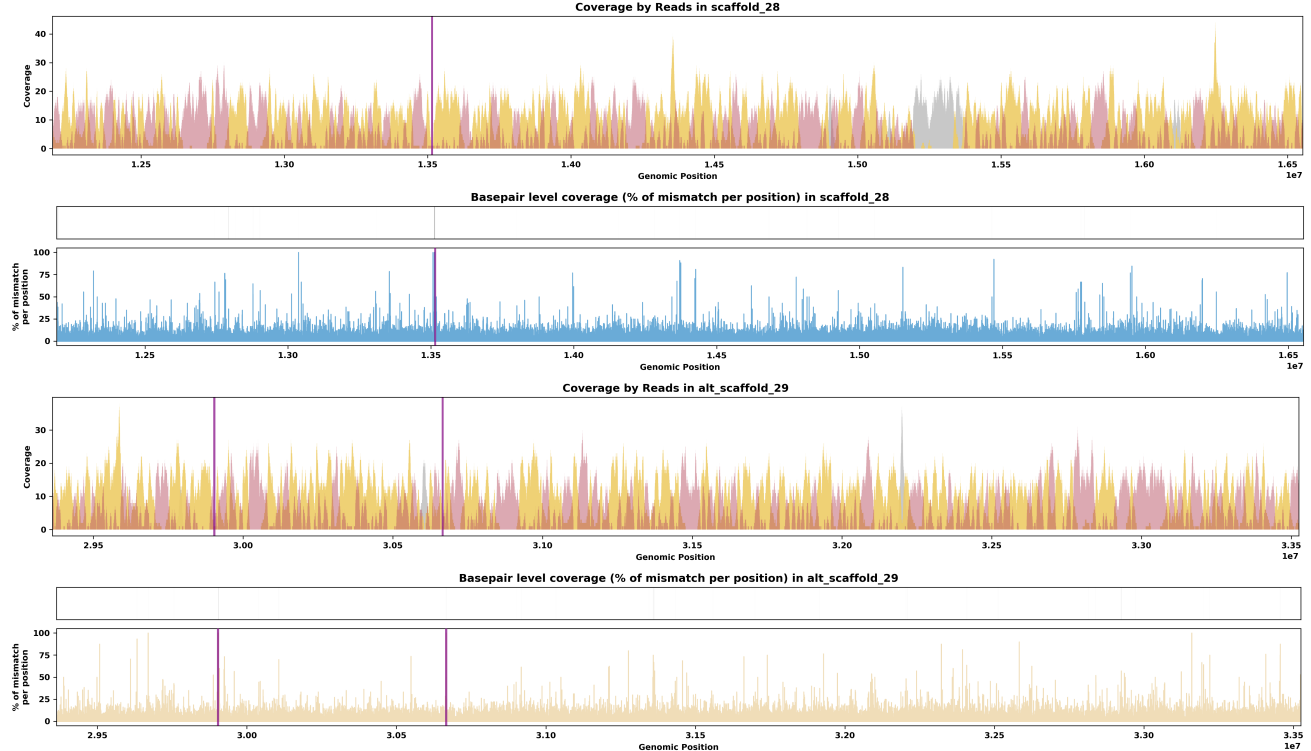

Species ID: mCerEla1

Common Name: Red Deer

Scientific Name: Cervus elaphus

Assembly Type: Not Haplotype Resolved

Data Source: VGP

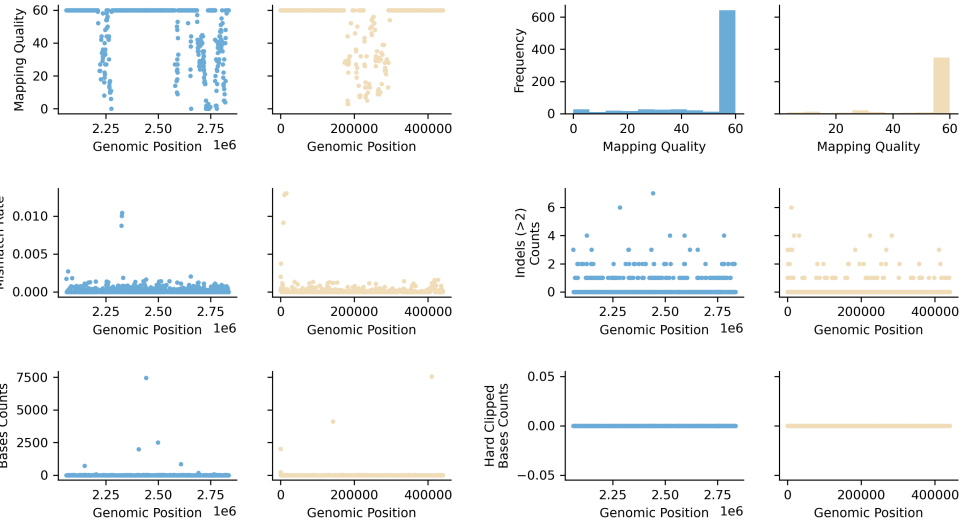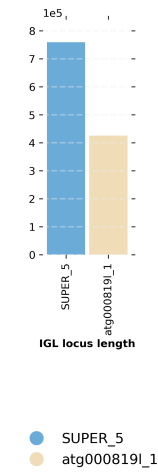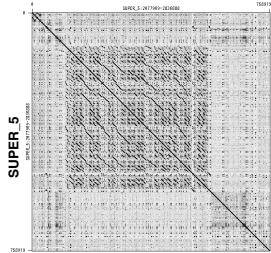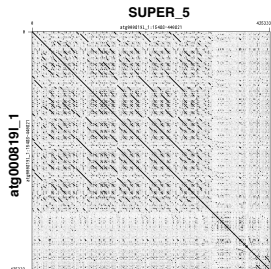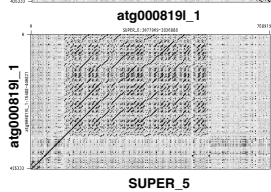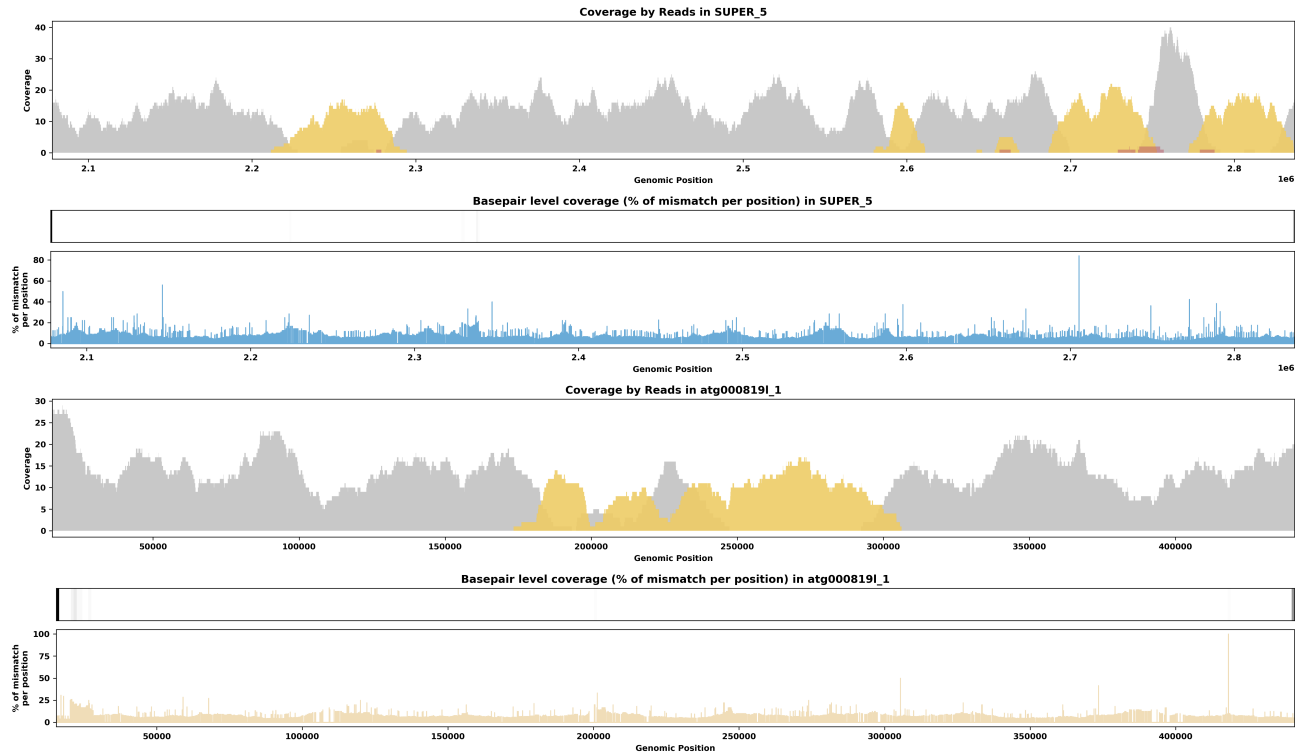

Species ID: mCorTow1  
 Common Name: Townsend's Big-eared Bat  
 Scientific Name: *Corynorhinus townsendii*  
 Assembly Type: Haplotype Resolved  
 Data Source: CCGP

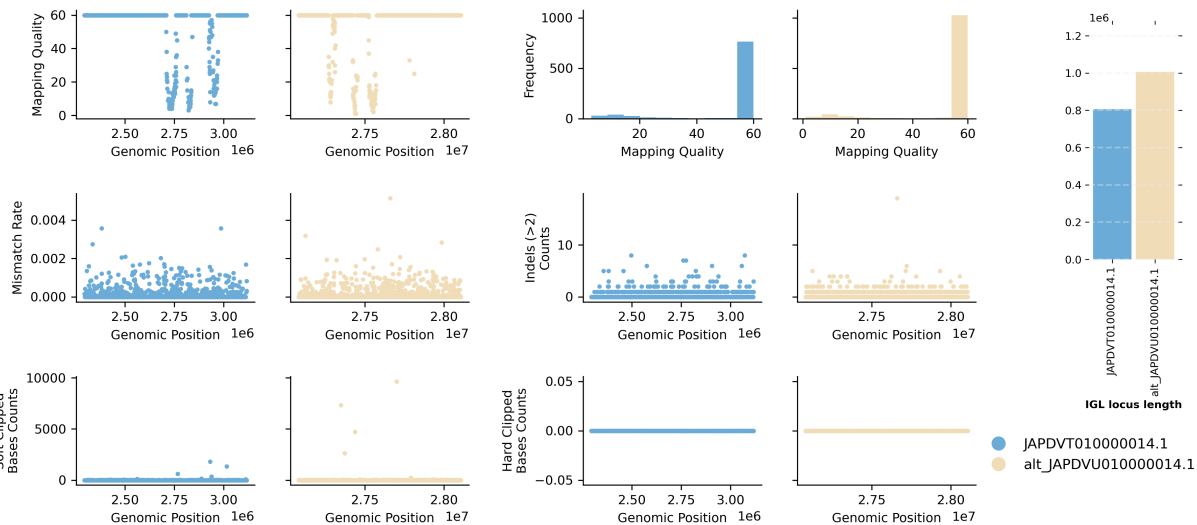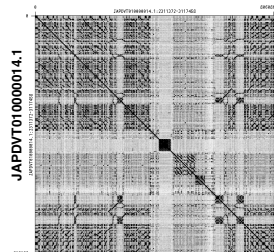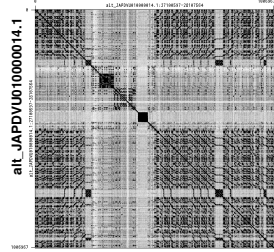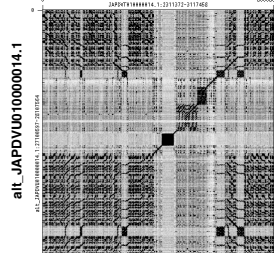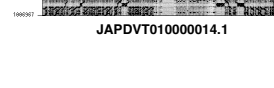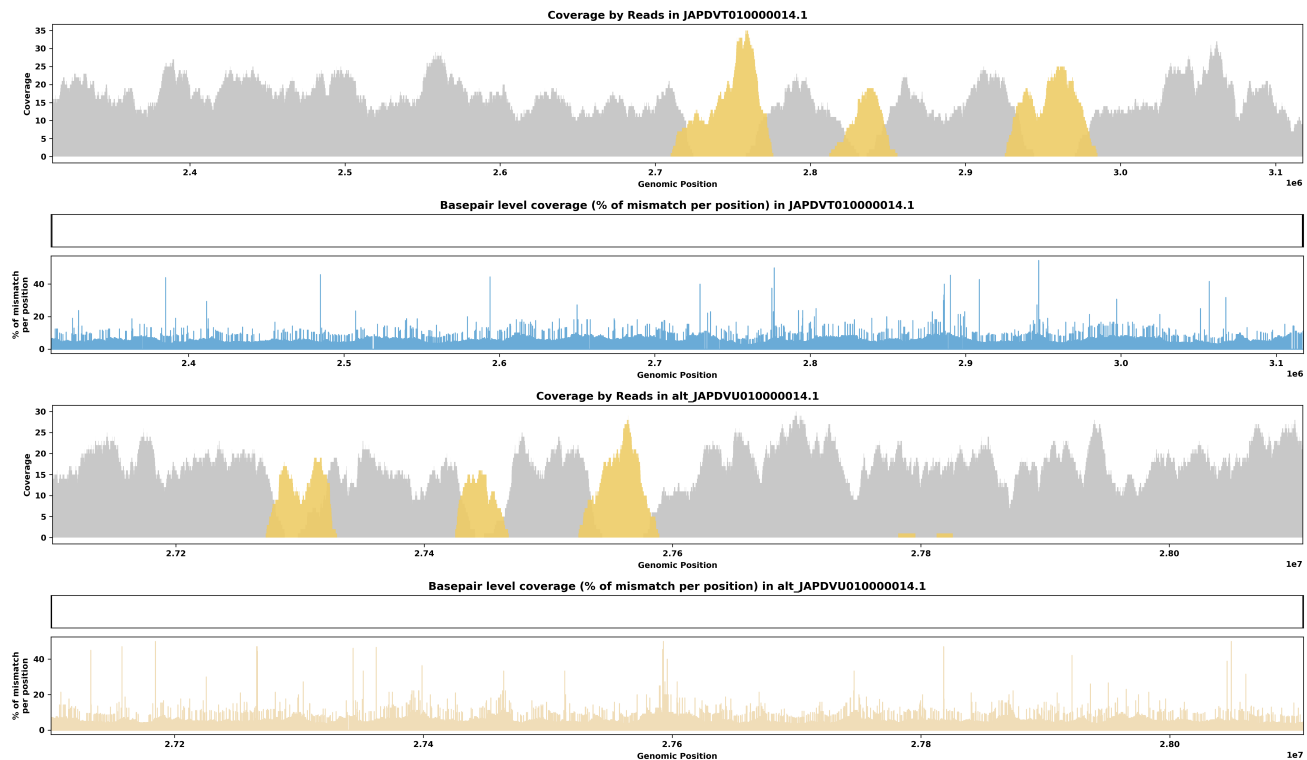



Species ID: mCynVol1

Common Name: Philippine flying lemur

Scientific Name: Cynocephalus volans

Assembly Type: Not Haplotype Resolved

Data Source: VGP

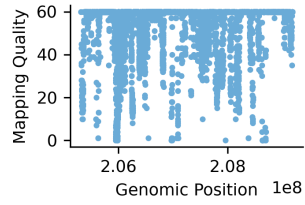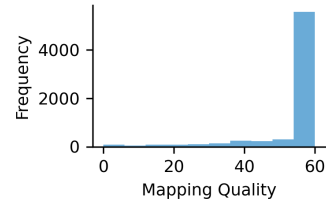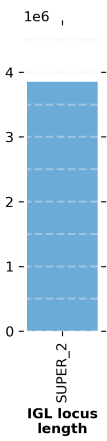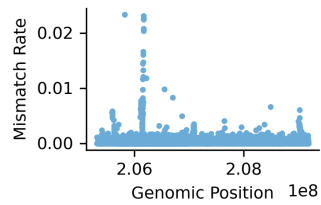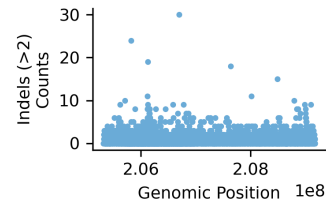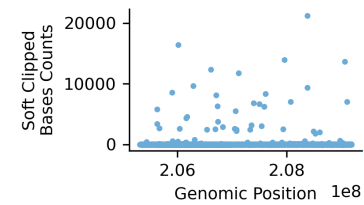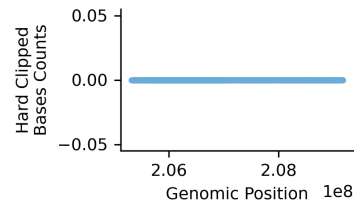

● SUPER\_2

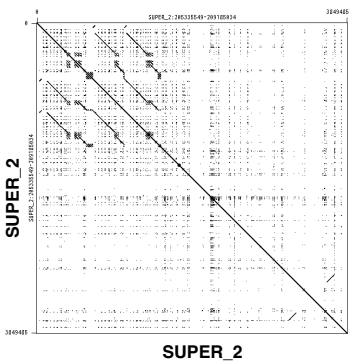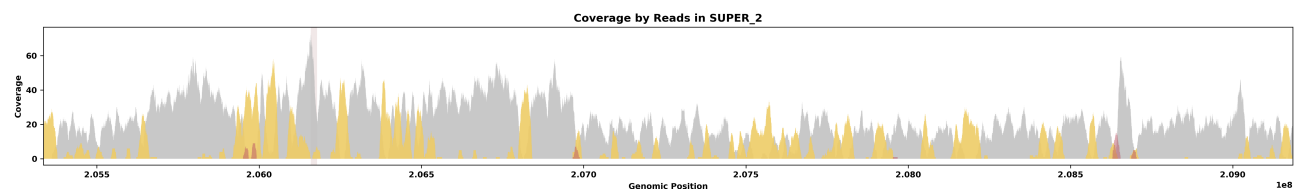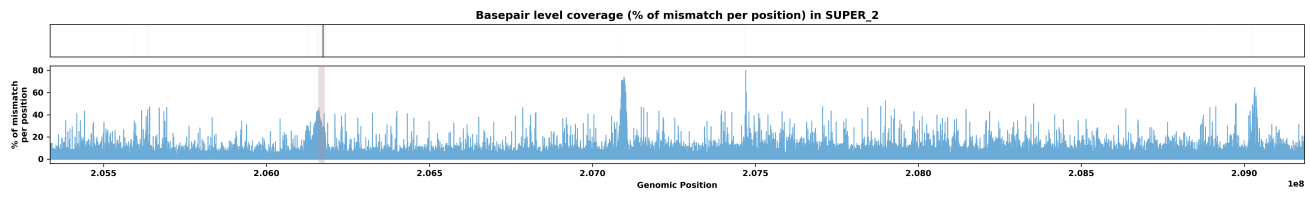

Species ID: mDasNov1

Common Name: nine-banded armadillo

Scientific Name: Dasypus novemcinctus

Assembly Type: Haplotype Resolved

Data Source: VGP

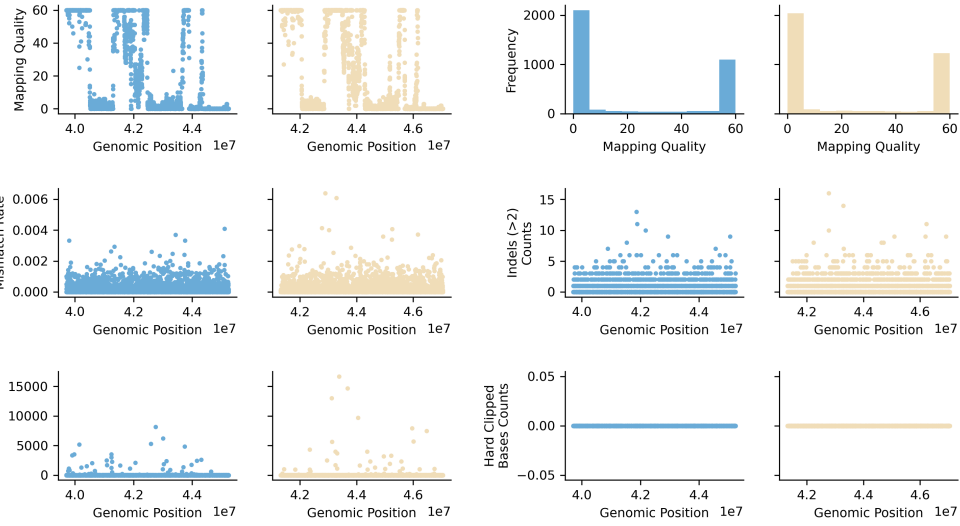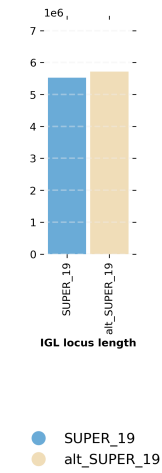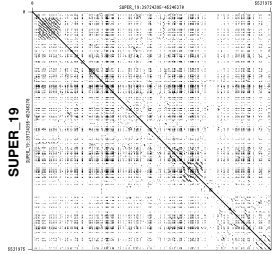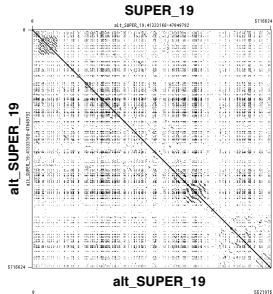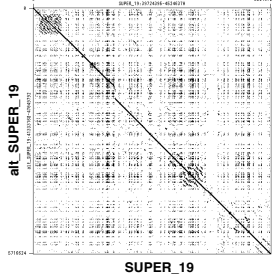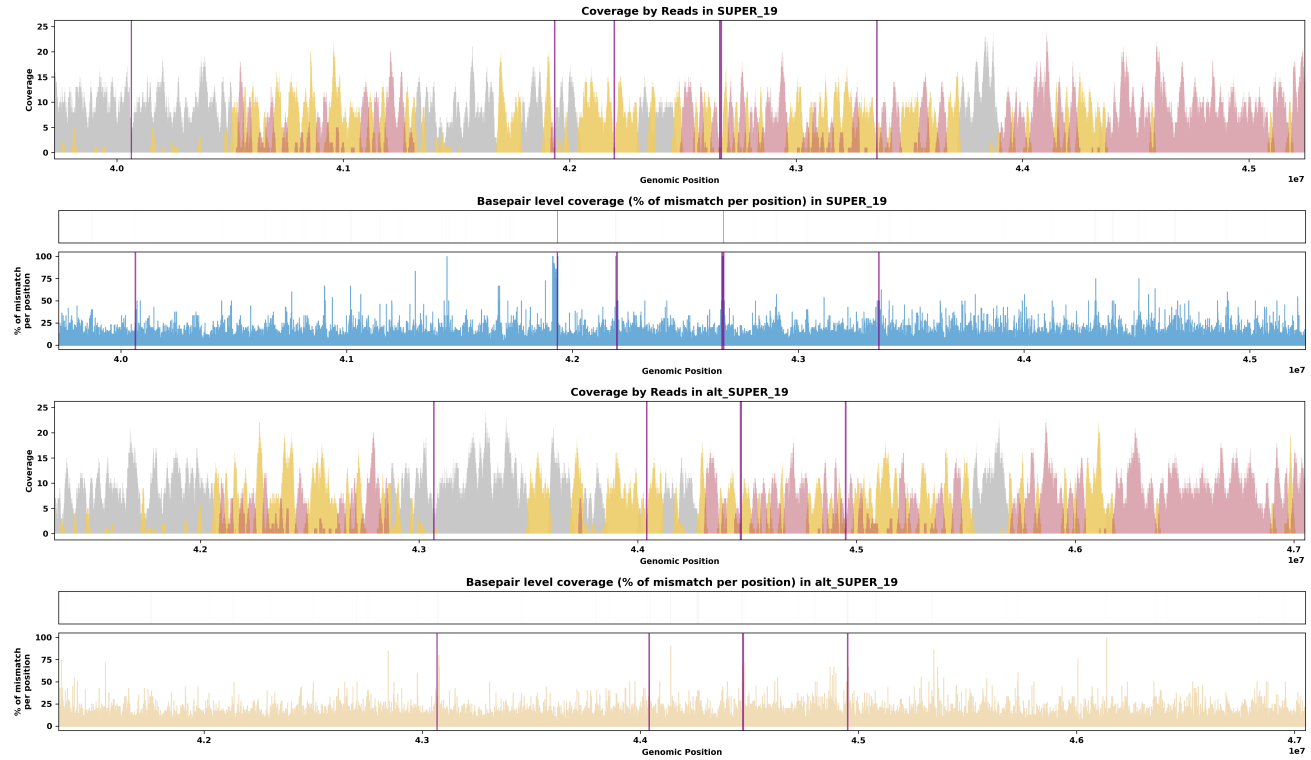

Species ID: mDelDel1

Common Name: saddleback dolphin

Scientific Name: Delphinus delphis

Assembly Type: Not Haplotype Resolved

Data Source: VGP

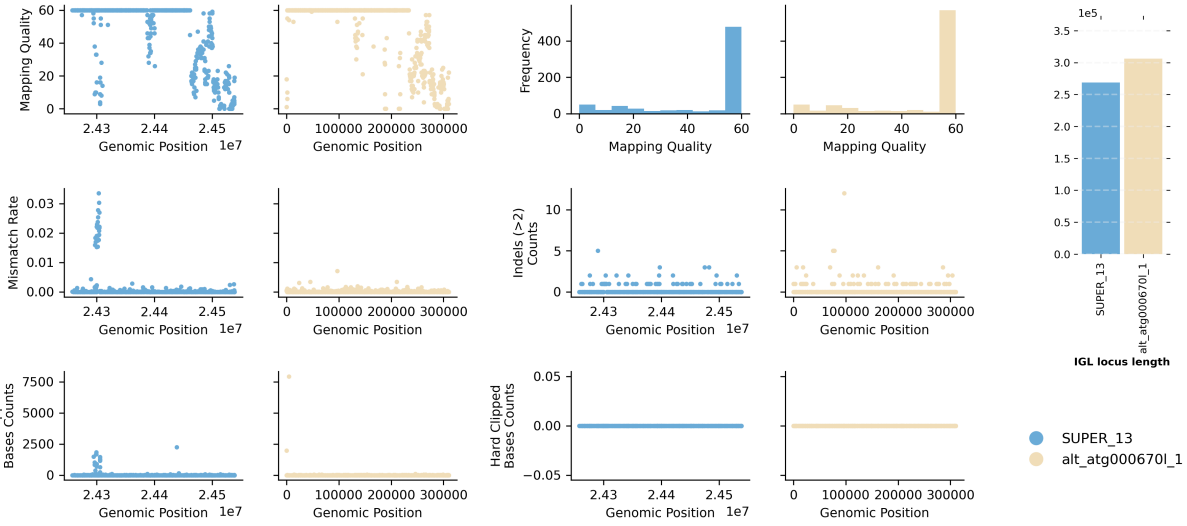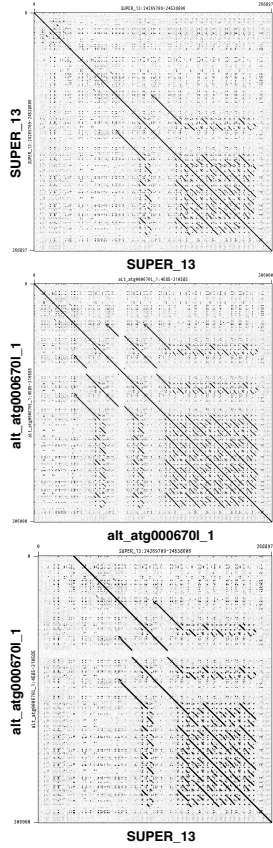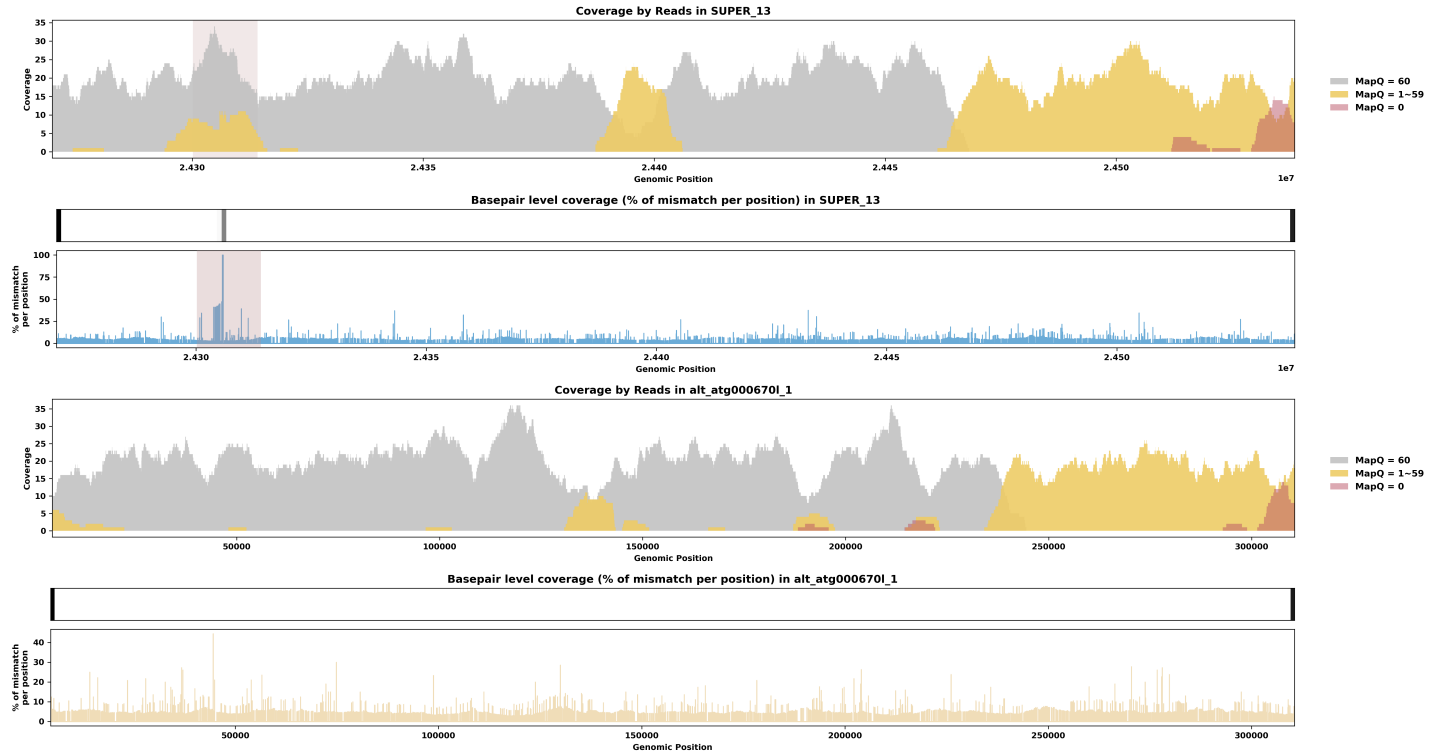

Species ID: mDicBic1

Common Name: black rhinoceros

Scientific Name: *Diceros bicornis*

Assembly Type: Haplotype Resolved

Data Source: VGP

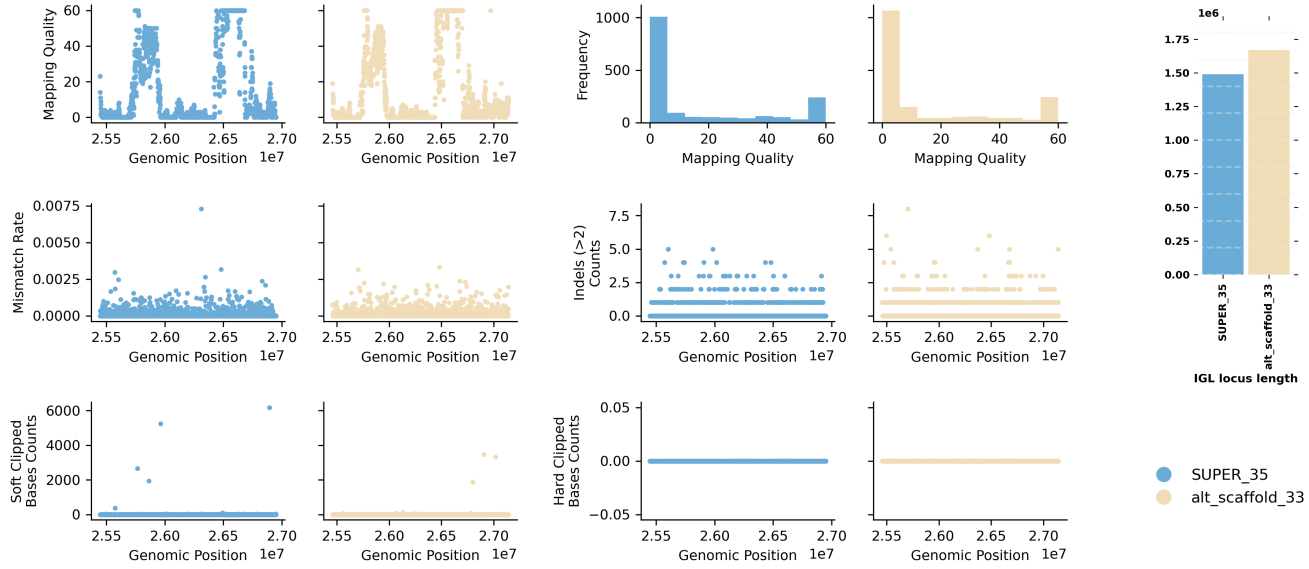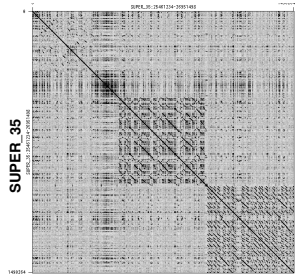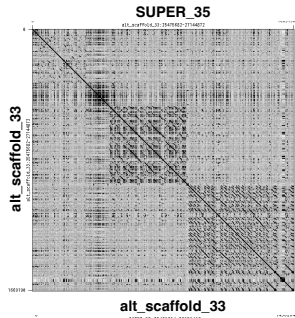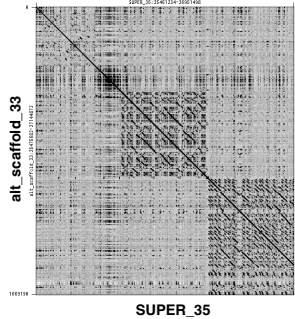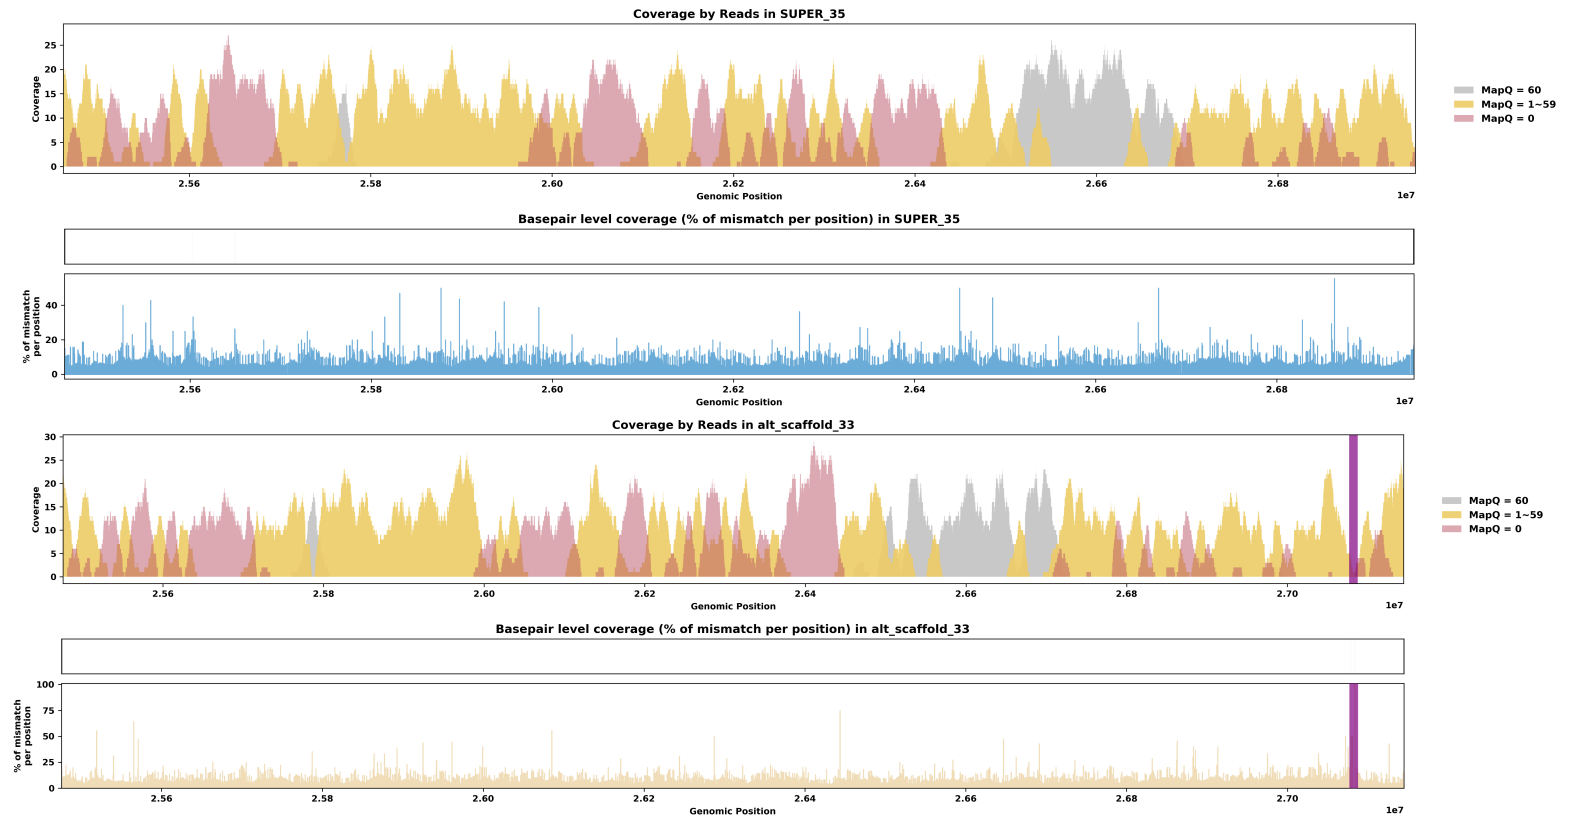

Species ID: mEleMax1  
 Common Name: Asiatic Elephant  
 Scientific Name: *Elephas maximus*  
 Assembly Type: Not Haplotype Resolved  
 Data Source: VGP

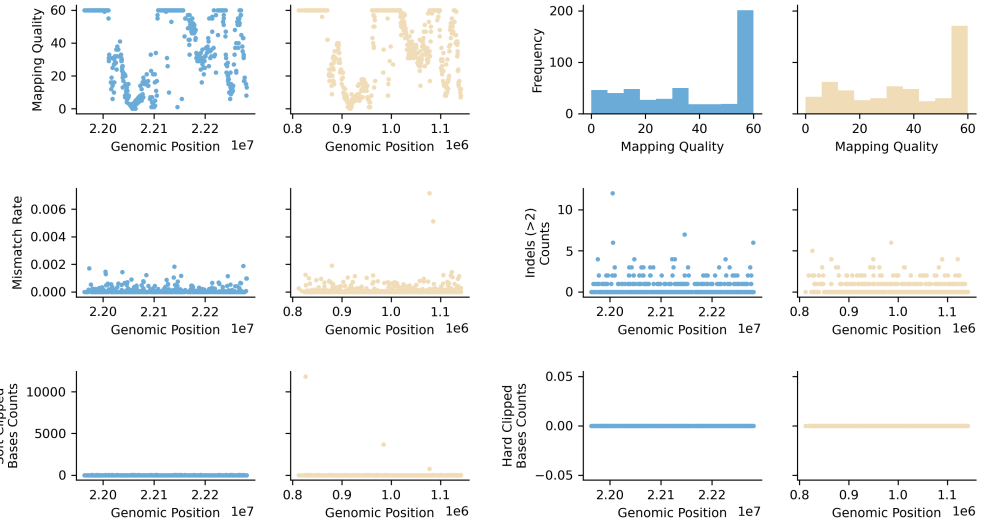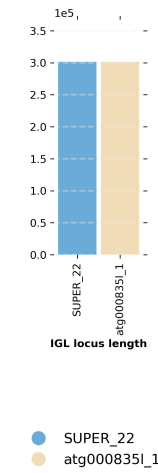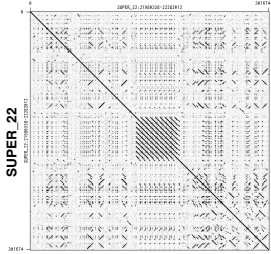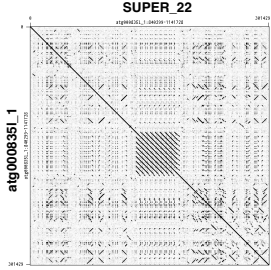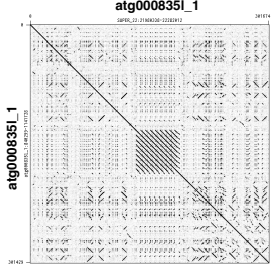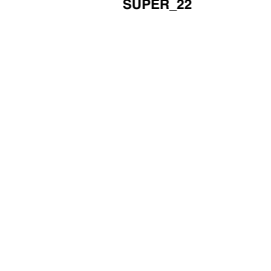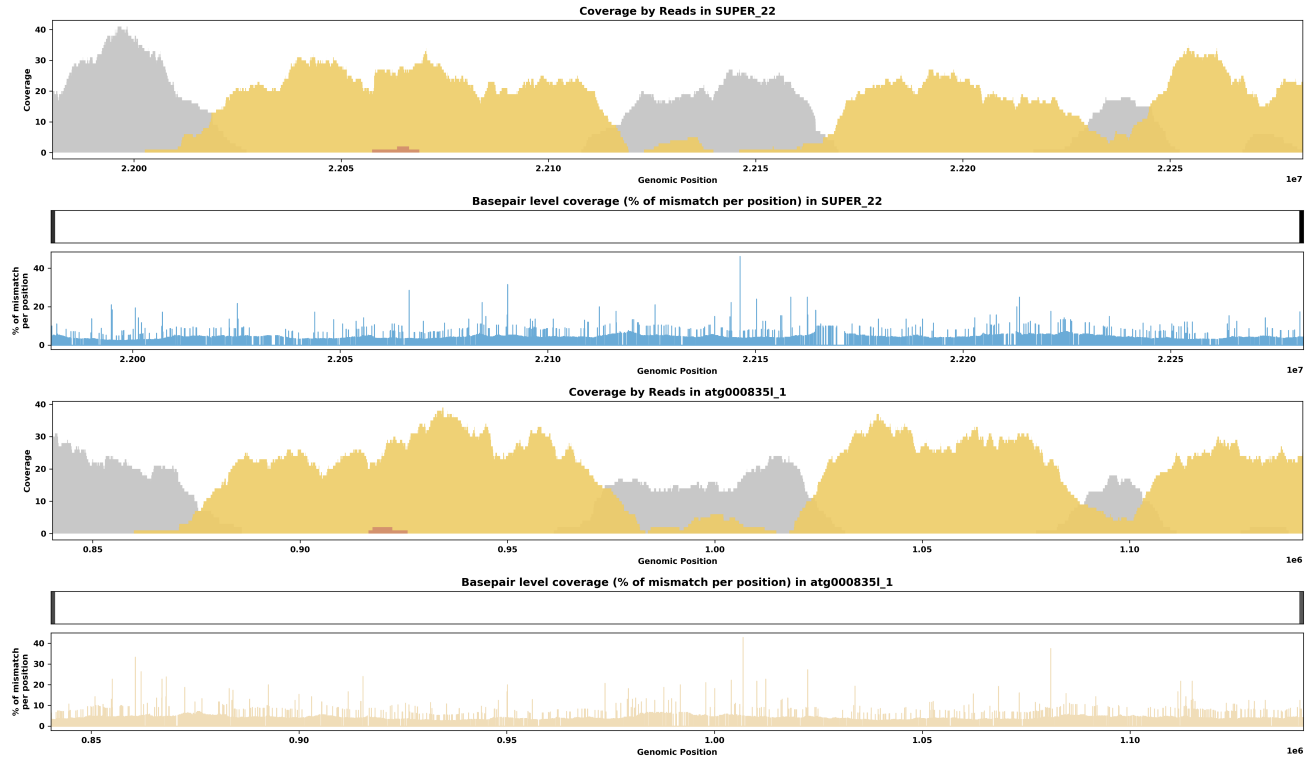

Species ID: mEptNil1

Common Name: northern bat

Scientific Name: Eptesicus nilssonii

Assembly Type: Not Haplotype Resolved

Data Source: VGP

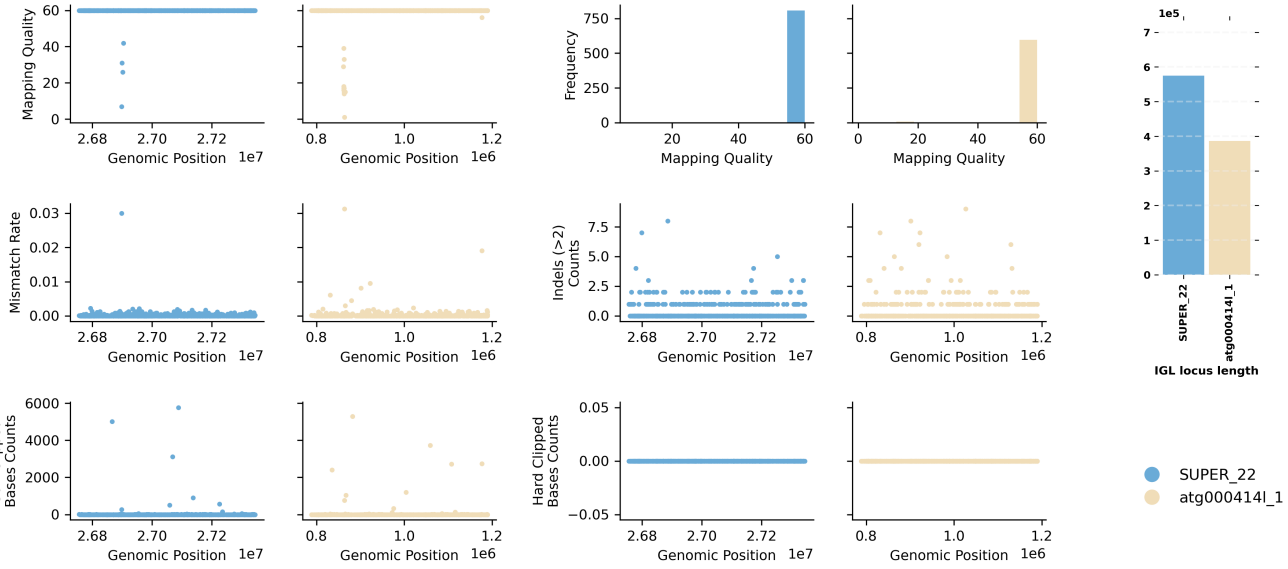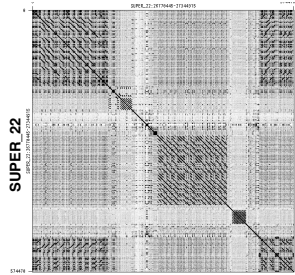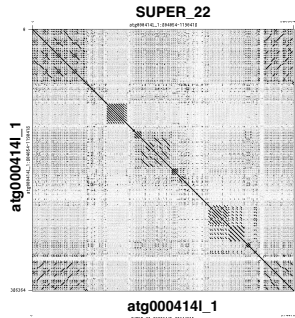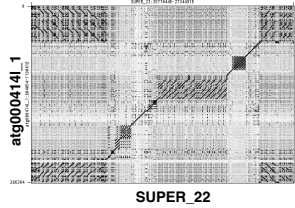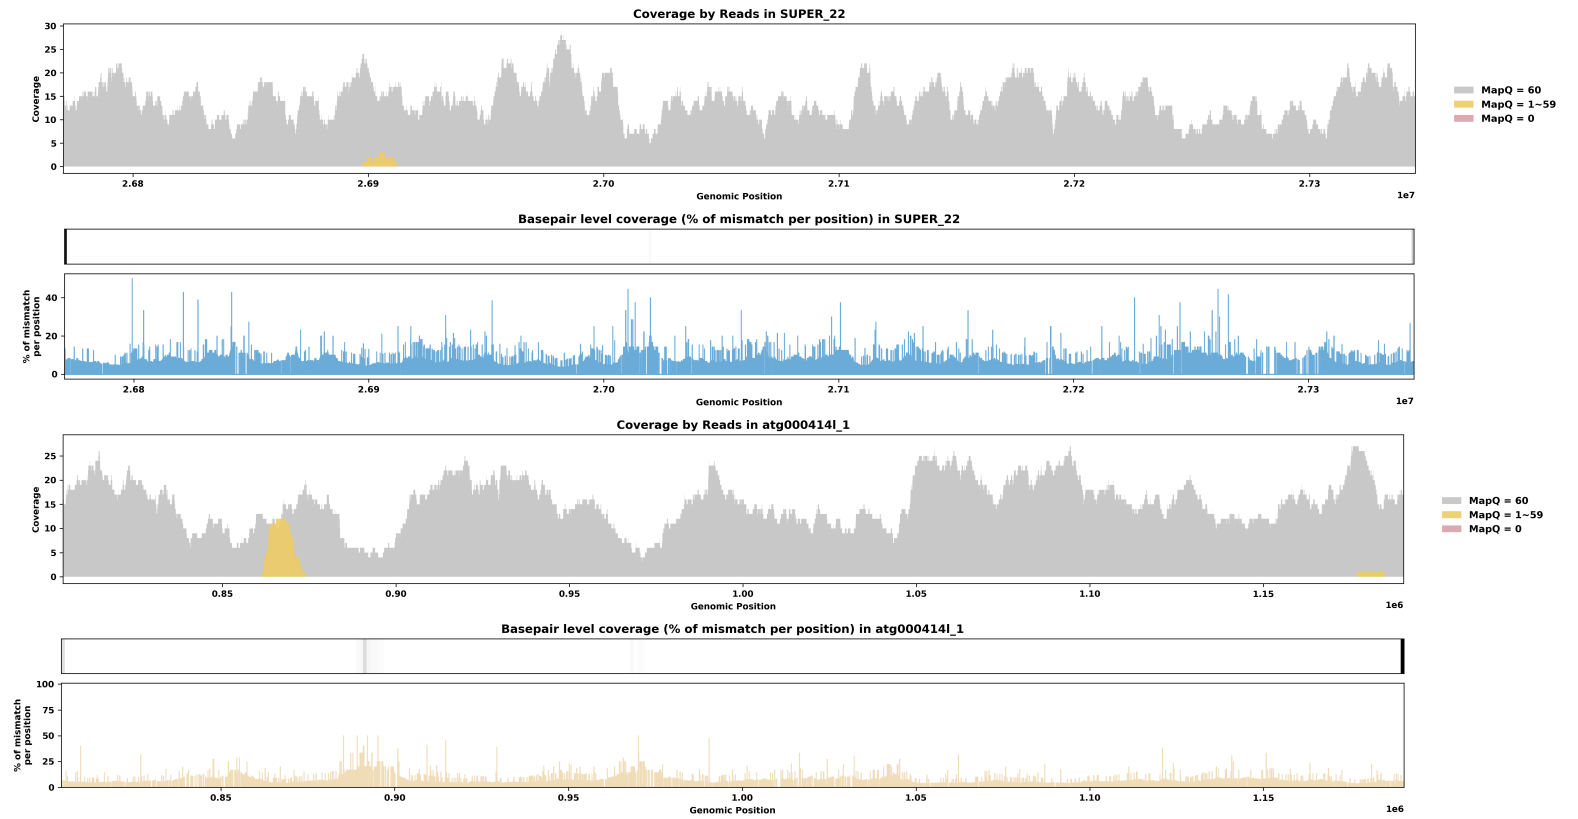

Species ID: mEriEur2  
 Common Name: western European hedgehog  
 Scientific Name: Erinaceus europaeus  
 Assembly Type: Not Haplotype Resolved  
 Data Source: VGP

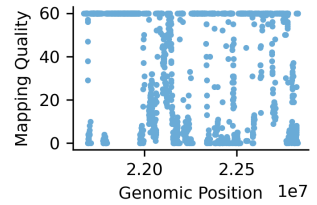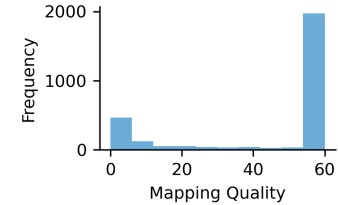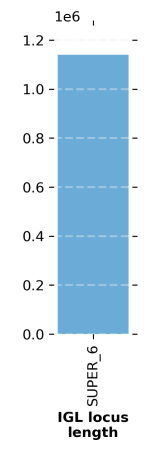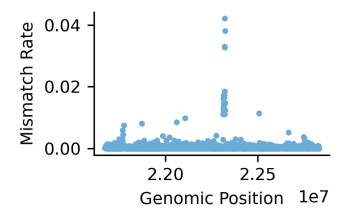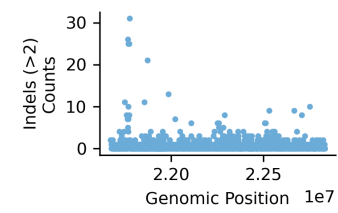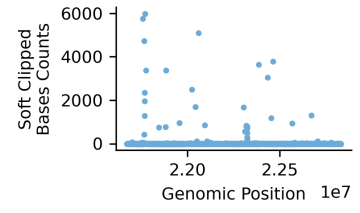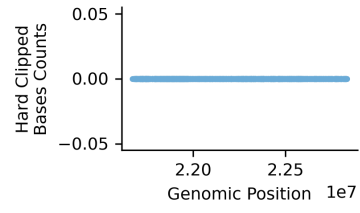

● SUPER\_6

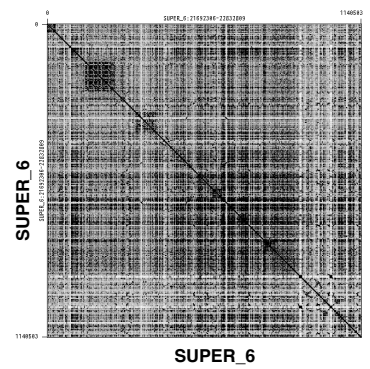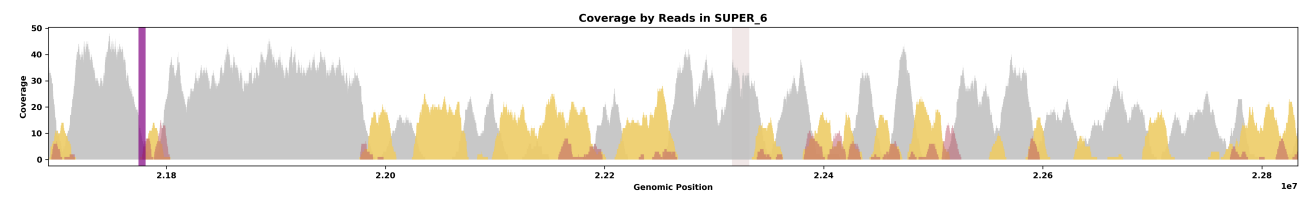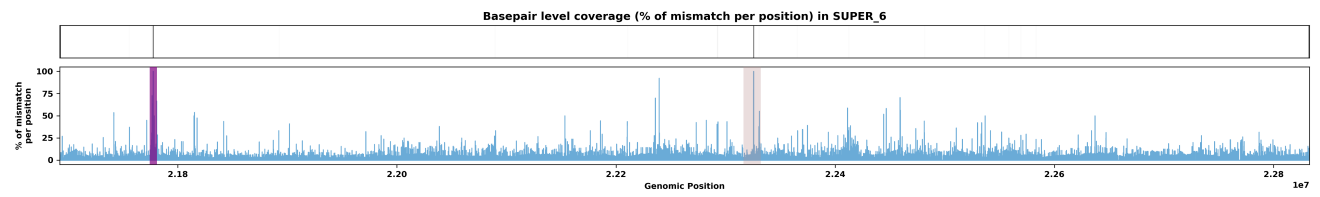

Species ID: mEscRob2  
 Common Name: grey whale  
 Scientific Name: *Eschrichtius robustus*  
 Assembly Type: Not Haplotype Resolved  
 Data Source: VGP

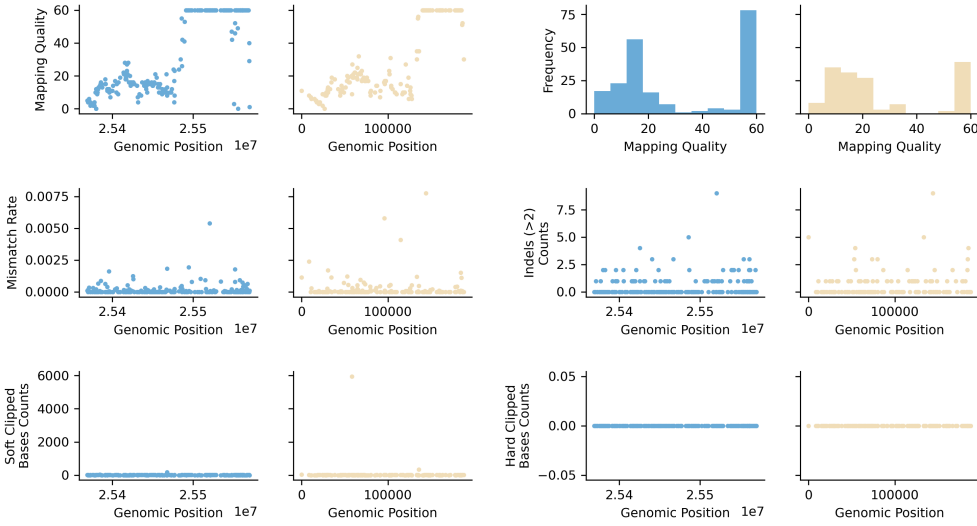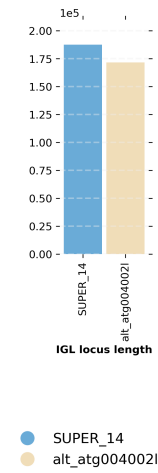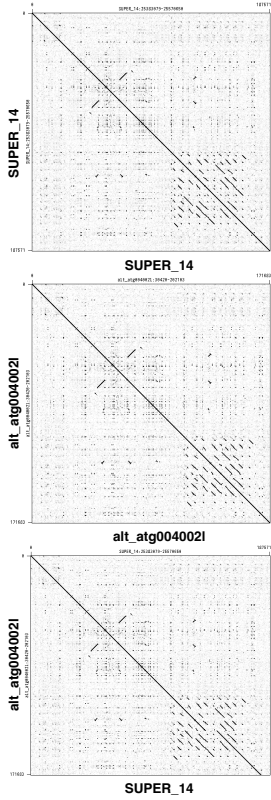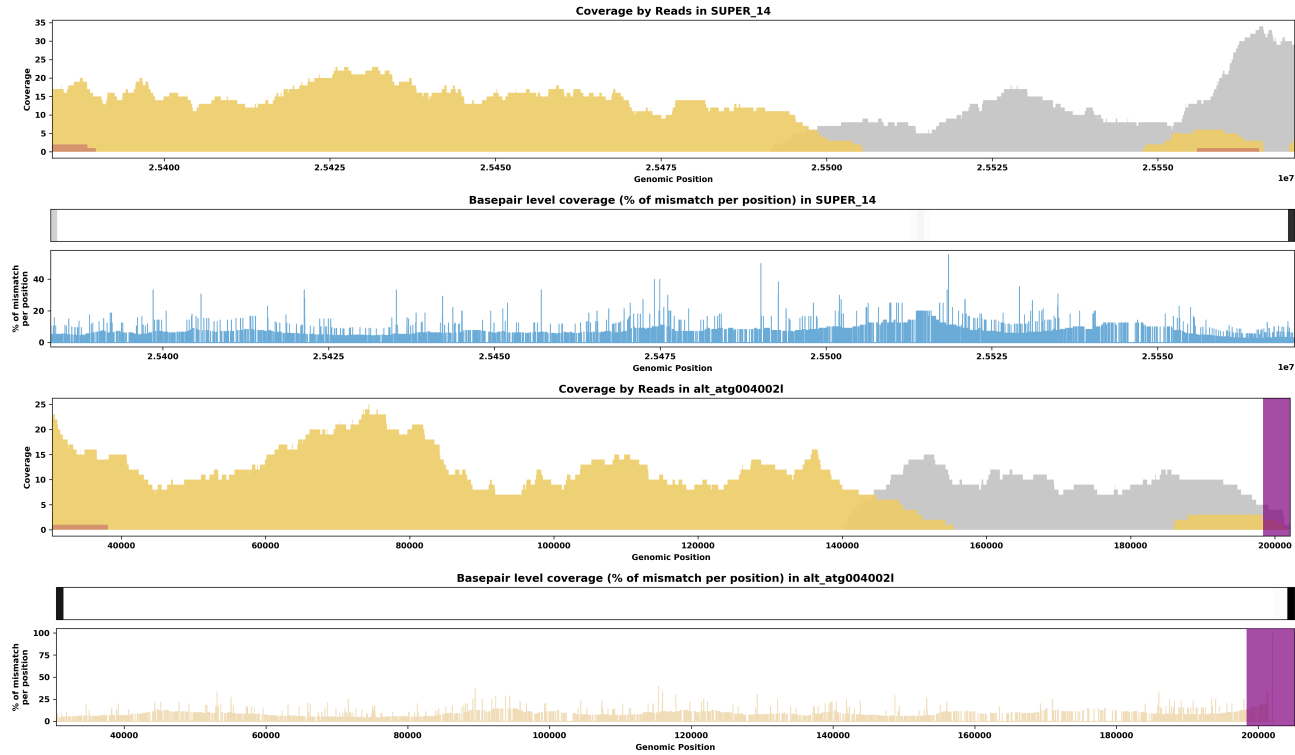



Species ID: mEubGla1  
 Common Name: North Atlantic right whale  
 Scientific Name: Eubalaena glacialis  
 Assembly Type: Haplotype Resolved  
 Data Source: VGP

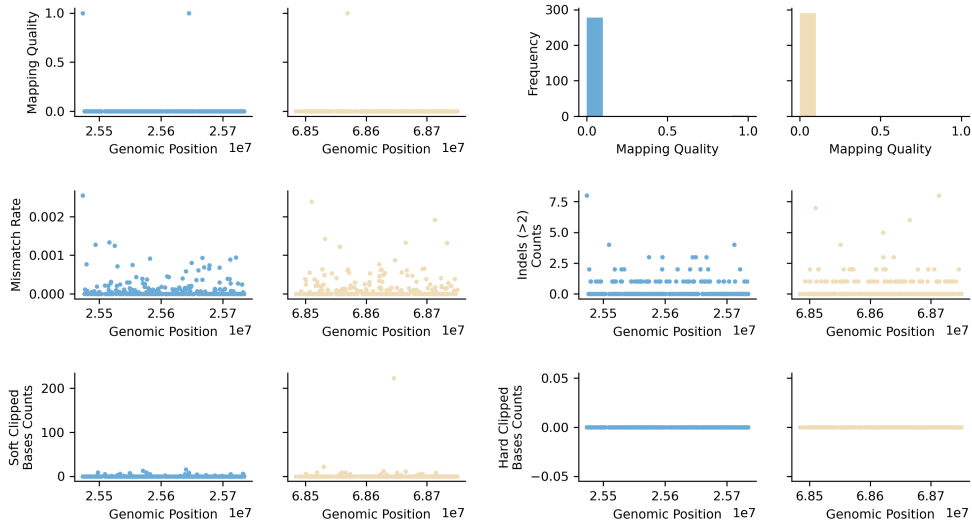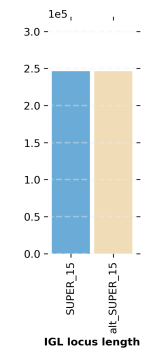

● SUPER\_15  
 ● alt\_SUPER\_15

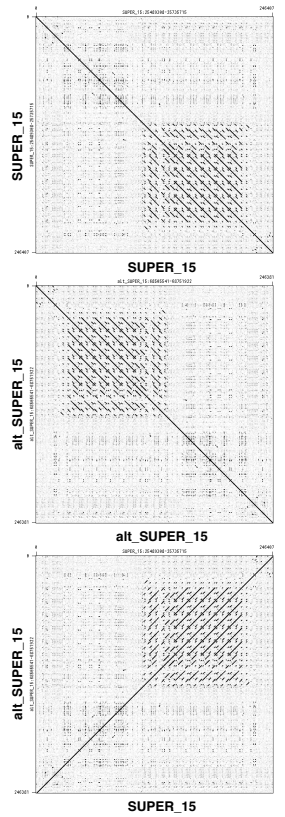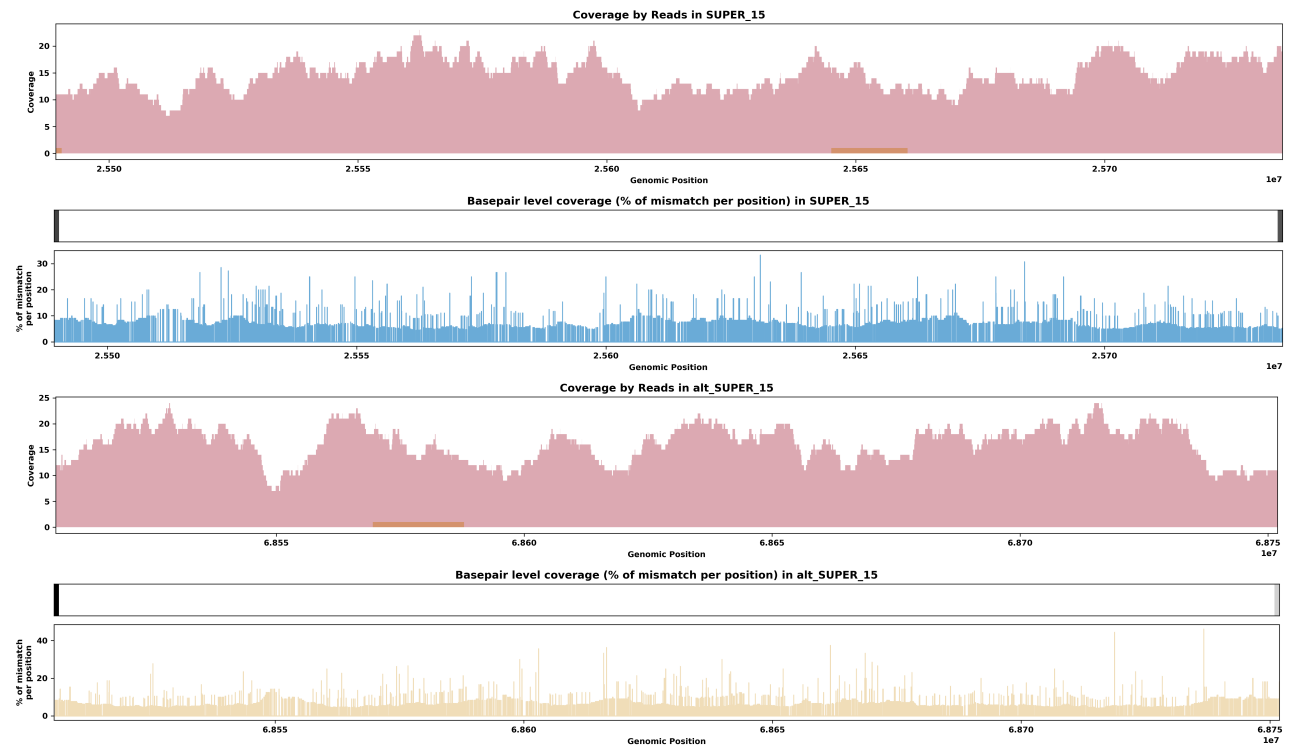

■ MapQ = 60  
 ■ MapQ = 1-59  
 ■ MapQ = 0

Species ID: mGloMel1

Common Name: long-finned pilot whale

Scientific Name: Globicephala melas

Assembly Type: Not Haplotype Resolved

Data Source: VGP

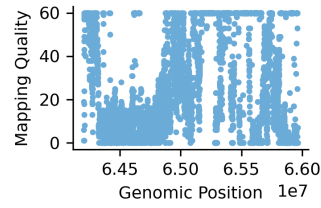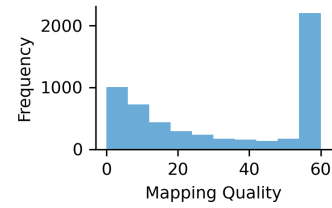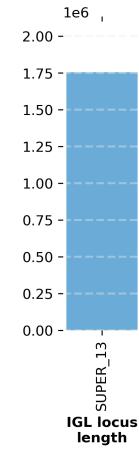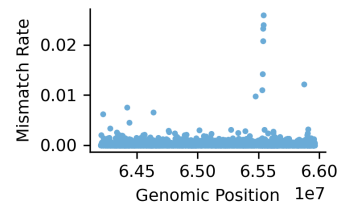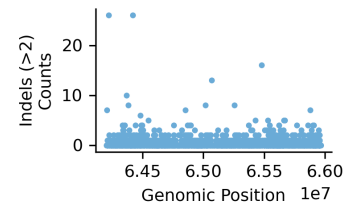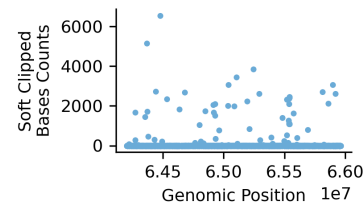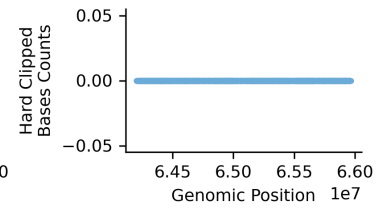

● SUPER\_13

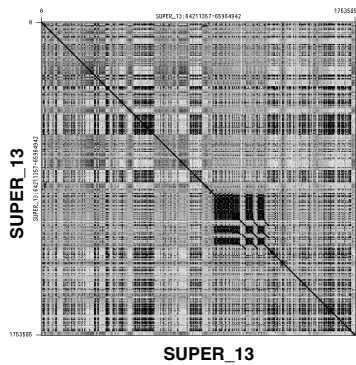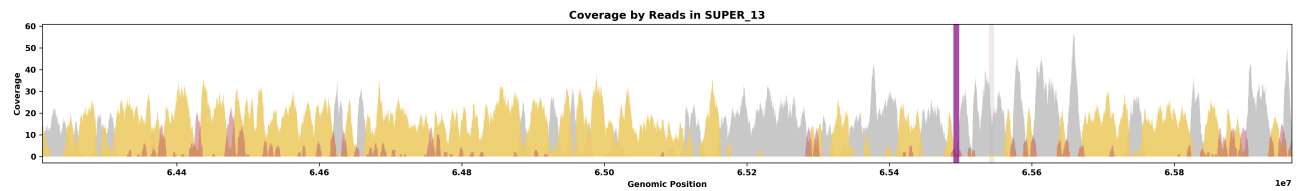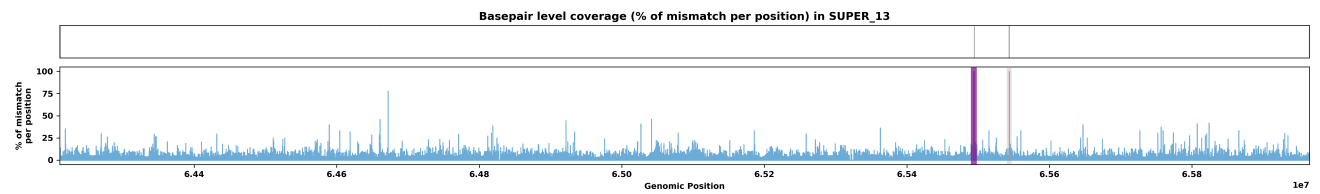

Species ID: mGorGor1  
 Common Name: Gorilla  
 Scientific Name: Gorilla\_gorilla  
 Assembly Type: Haplotype Resolved  
 Data Source: T2T Primate

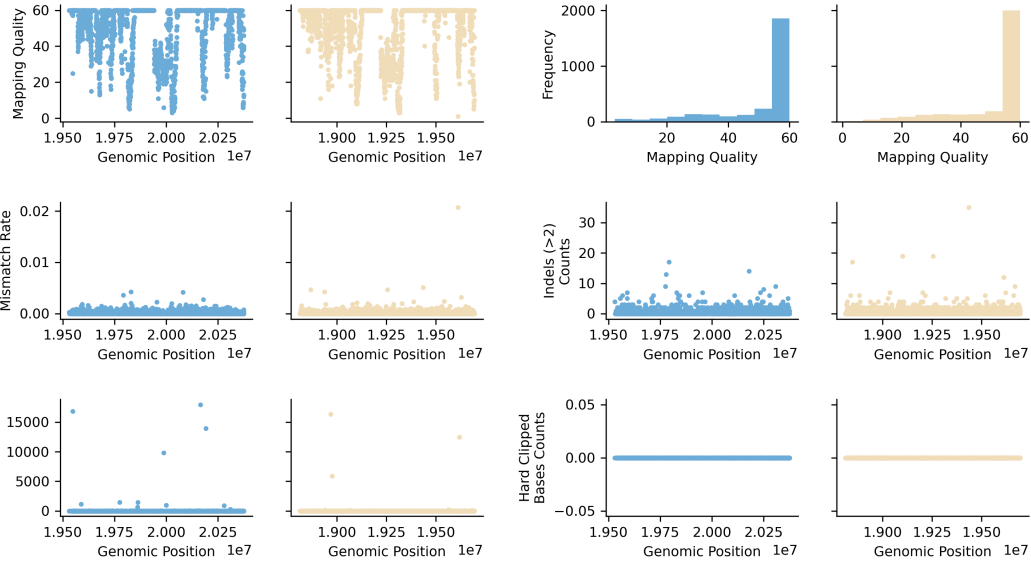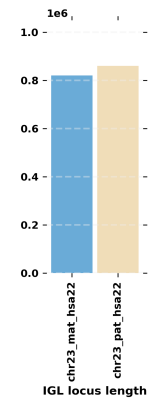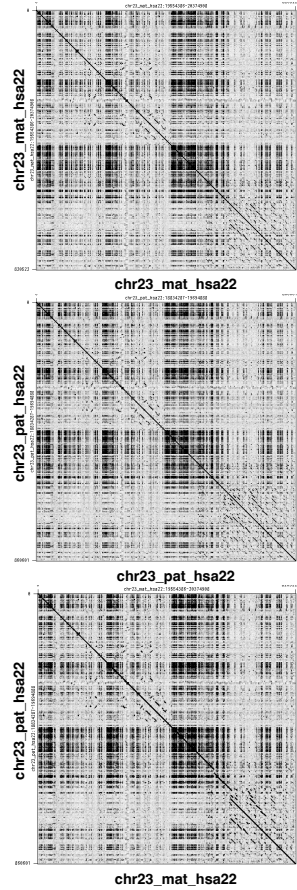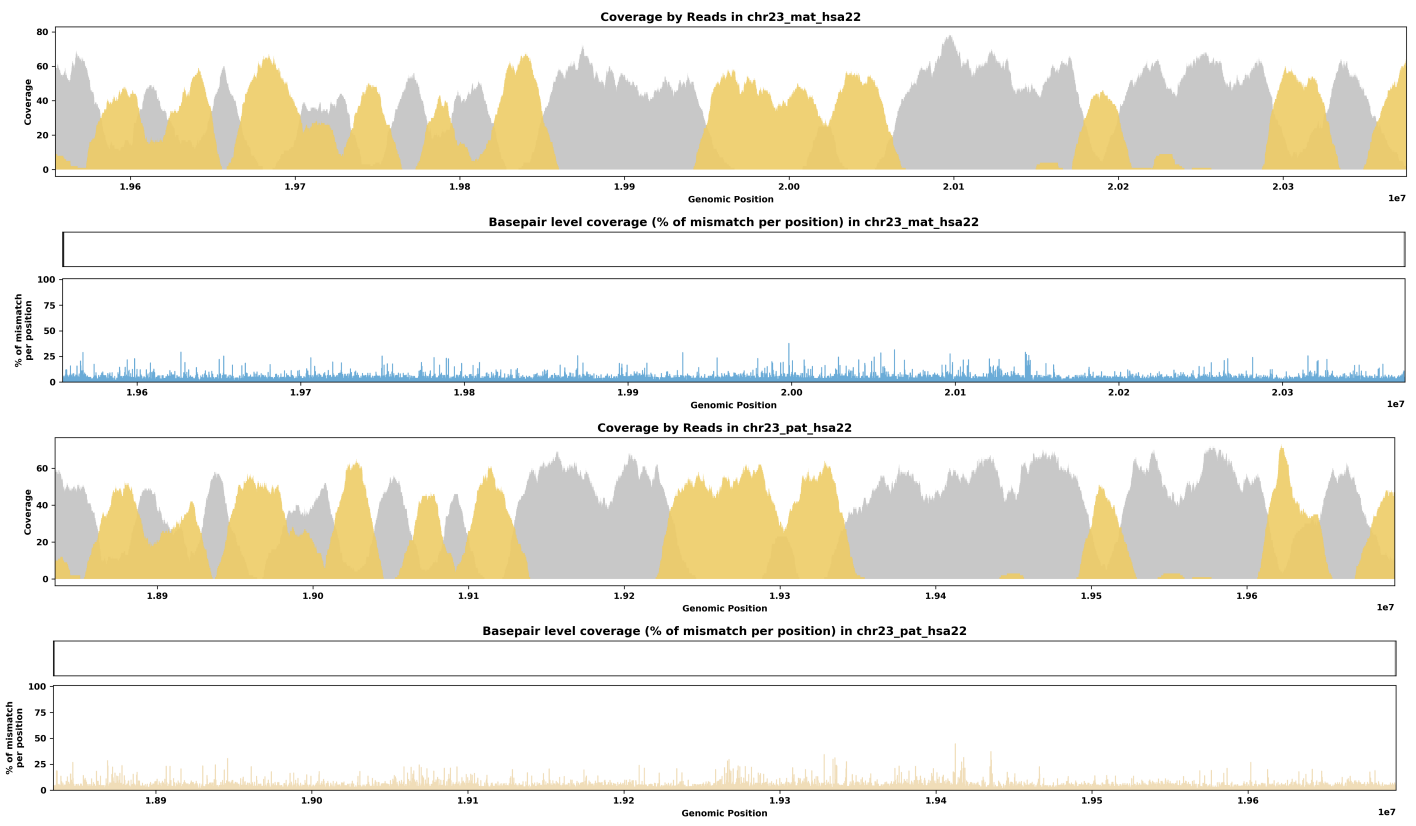

Species ID: mHetBru1

Common Name: Yellow-spotted hyrax

Scientific Name: Heterohyrax brucei

Assembly Type: Not Haplotype Resolved

Data Source: VGP

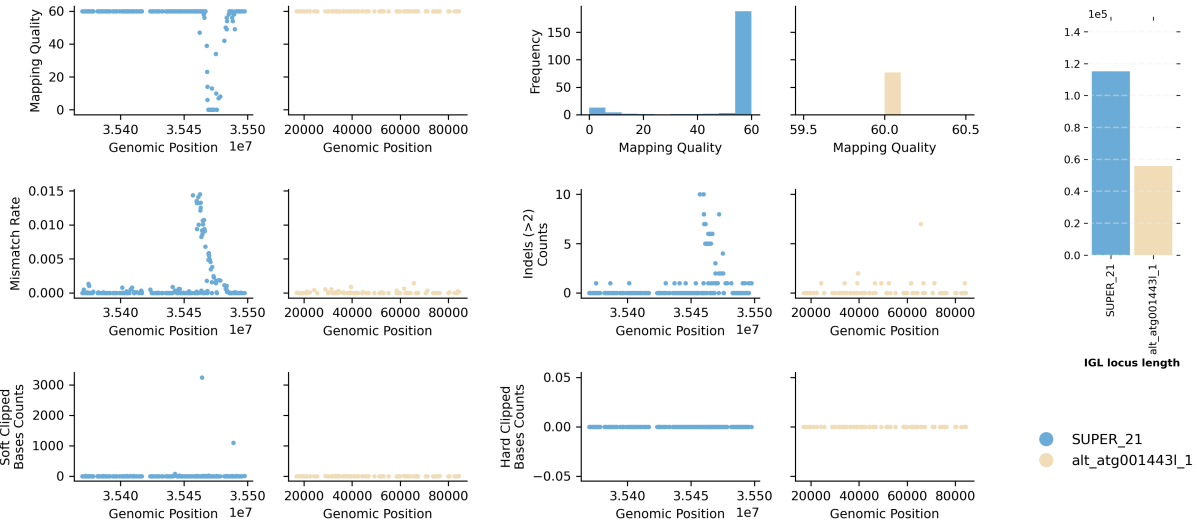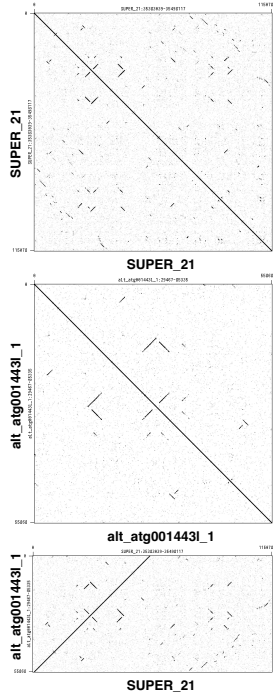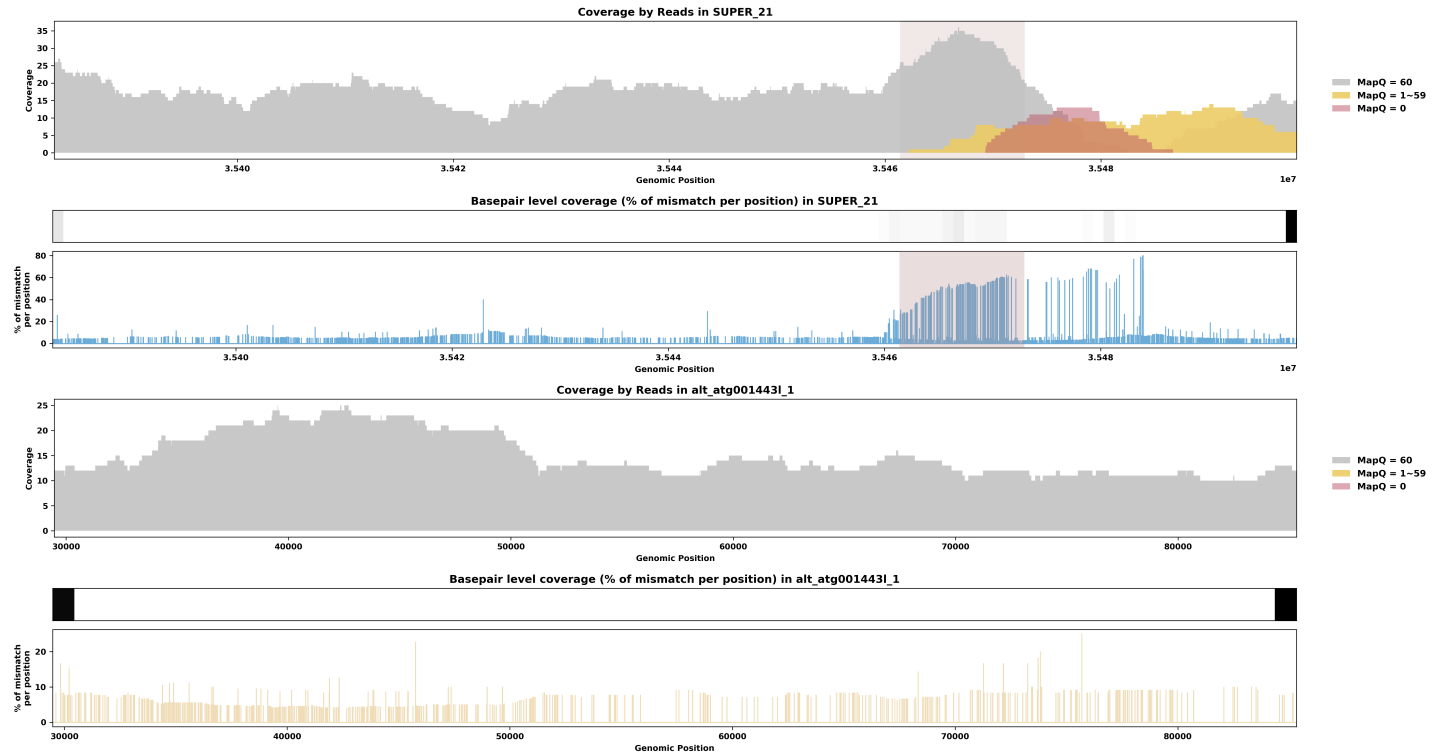

Species ID: mHipAmp2  
 Common Name: hippopotamus  
 Scientific Name: Hippopotamus amphibius kiboko  
 Assembly Type: Haplotype Resolved  
 Data Source: VGP

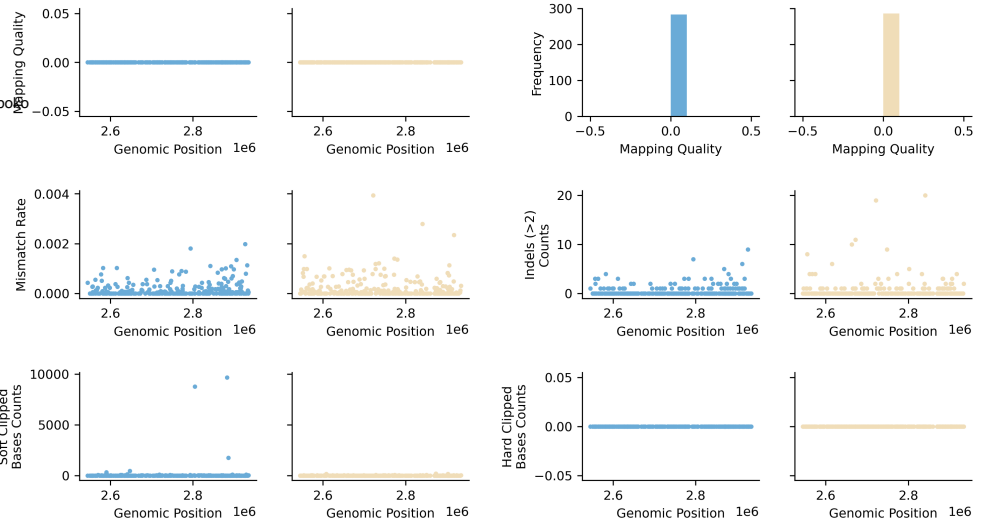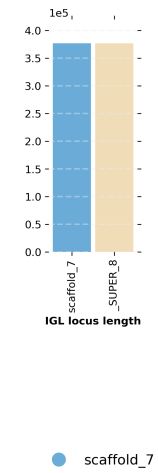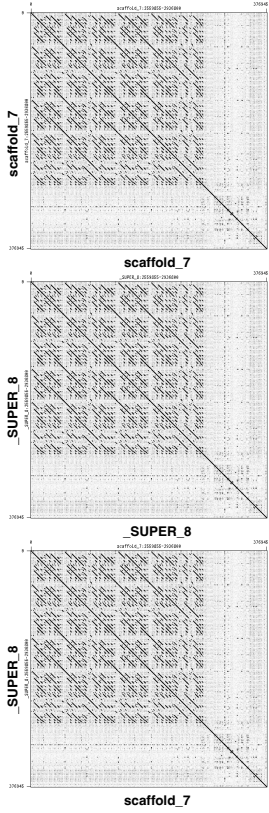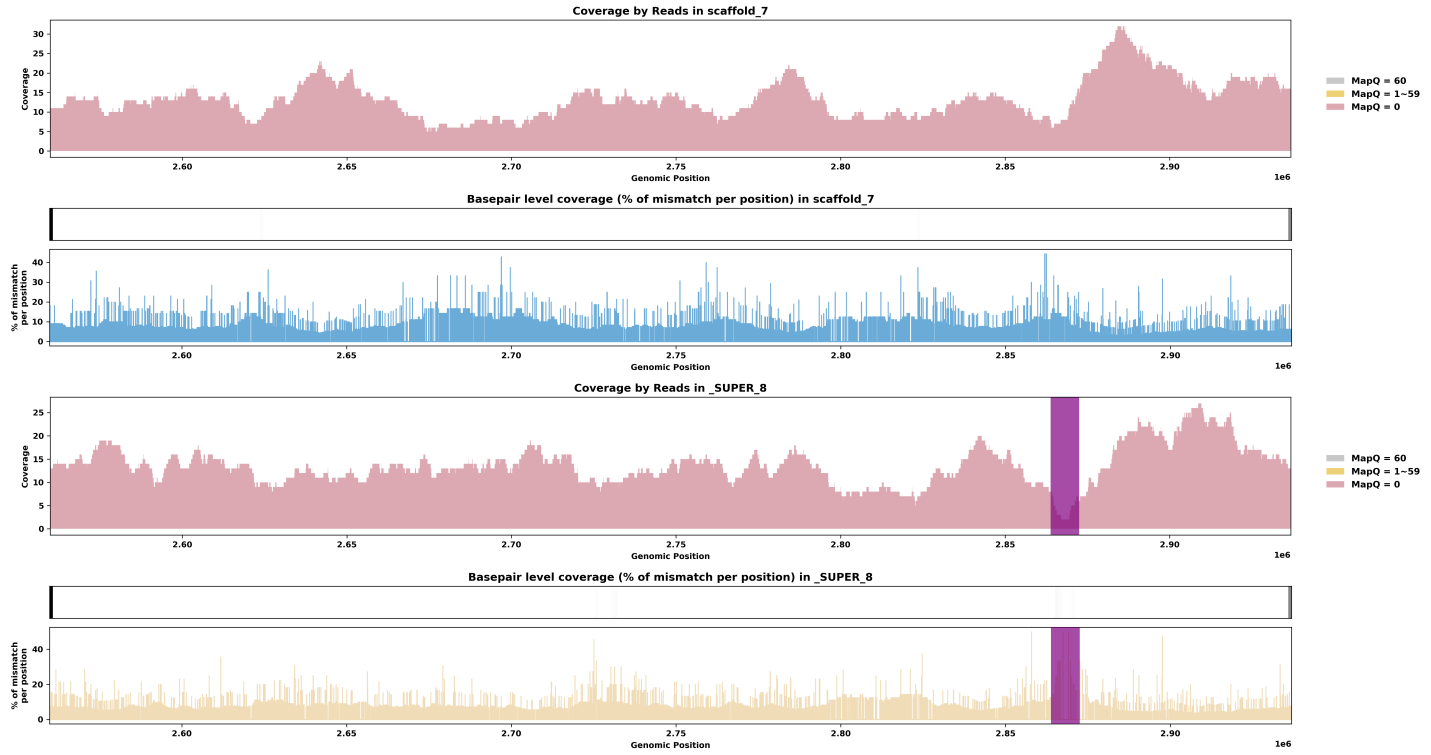

Species ID: mHypAmp2  
 Common Name: northern bottlenose whale  
 Scientific Name: *Hyperoodon ampullatus*  
 Assembly Type: Not Haplotype Resolved  
 Data Source: VGP

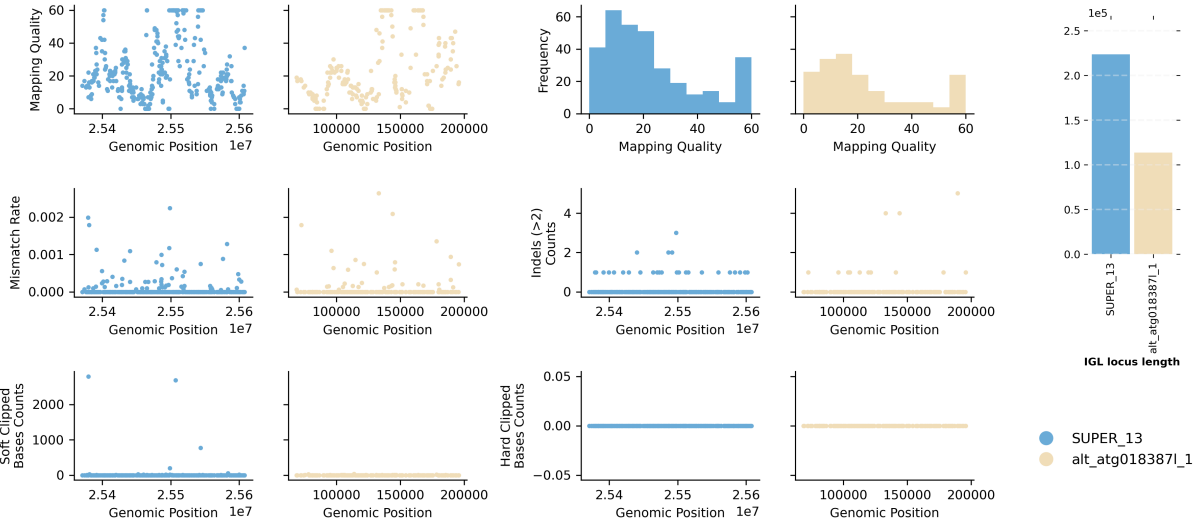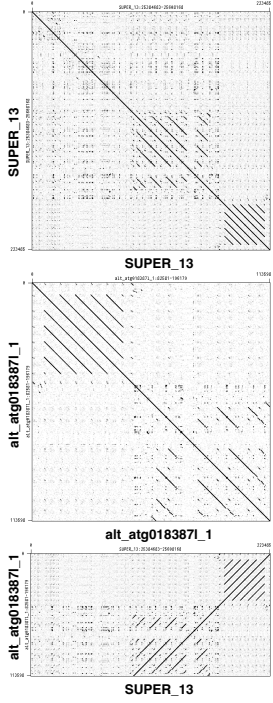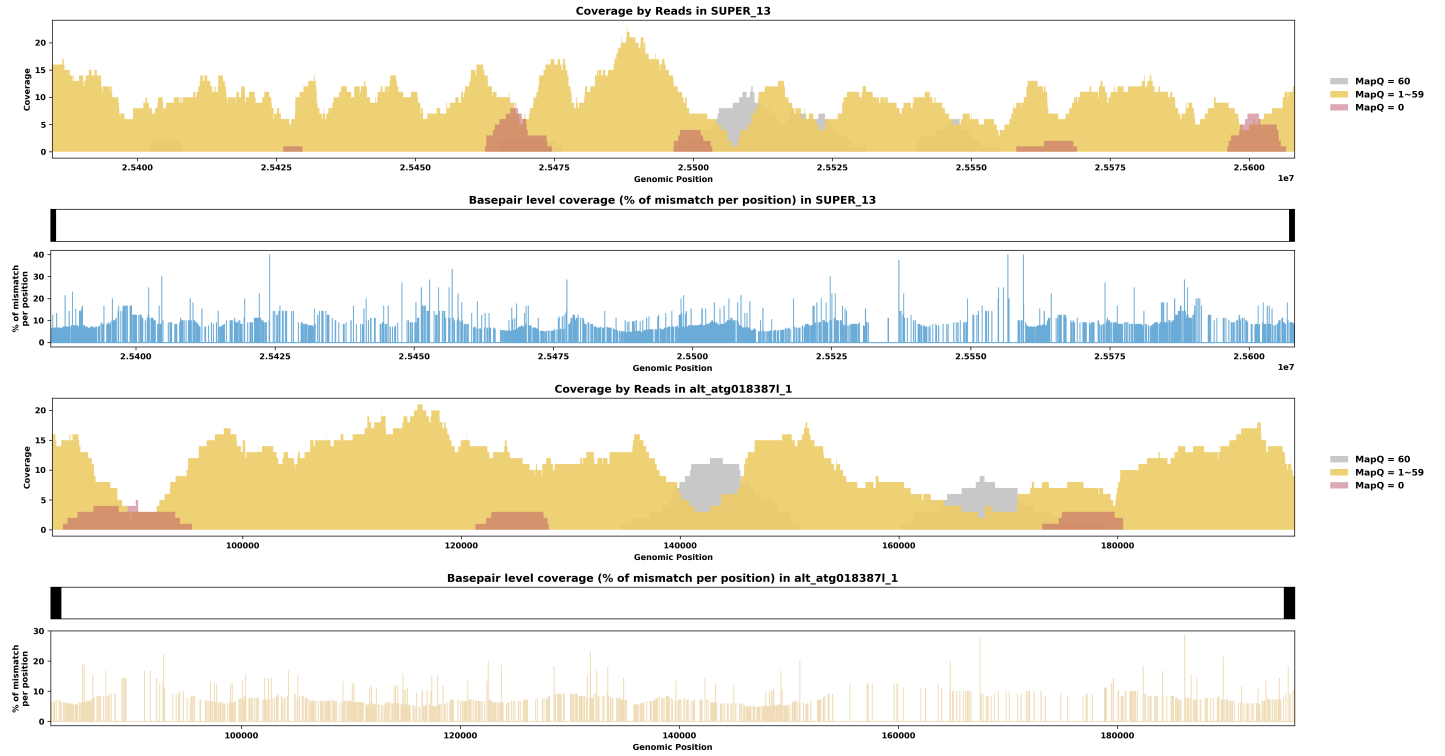

Species ID: mLagAlb1

Common Name: white-beaked dolphin

Scientific Name: Lagenorhynchus albirostris

Assembly Type: Not Haplotype Resolved

Data Source: VGP

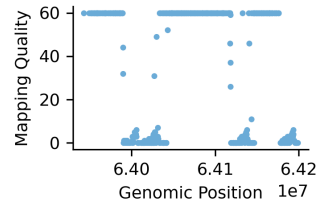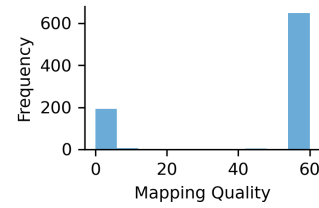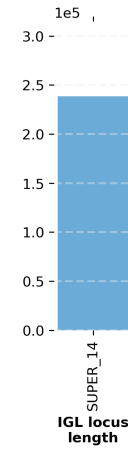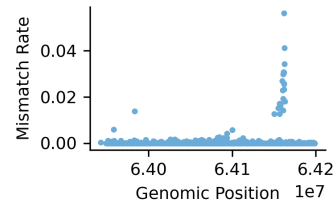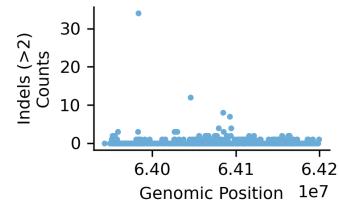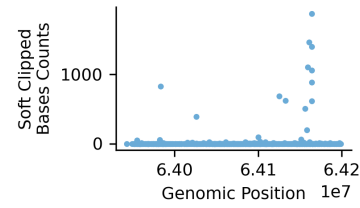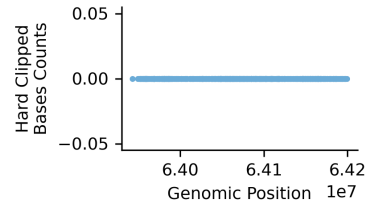

● SUPER\_14

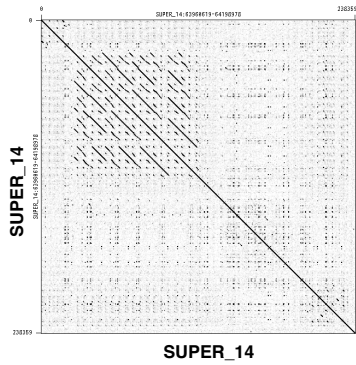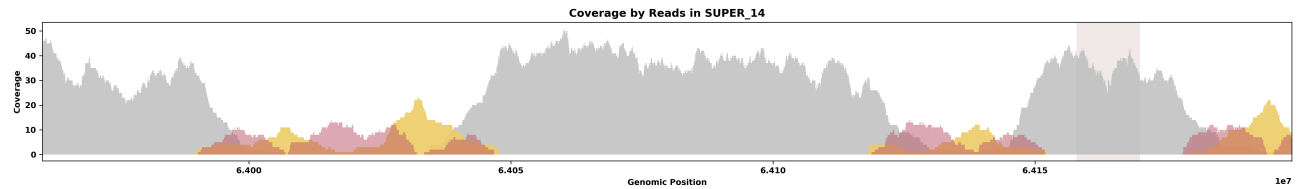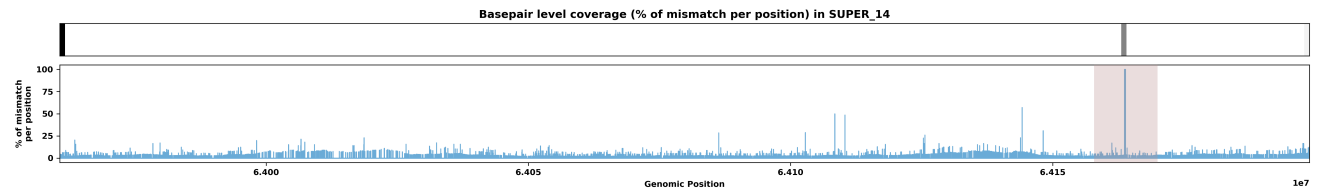

Species ID: mLemCat1  
 Common Name: Ring-tailed lemur  
 Scientific Name: Lemur catta  
 Assembly Type: Not Haplotype Resolved  
 Data Source: VGP

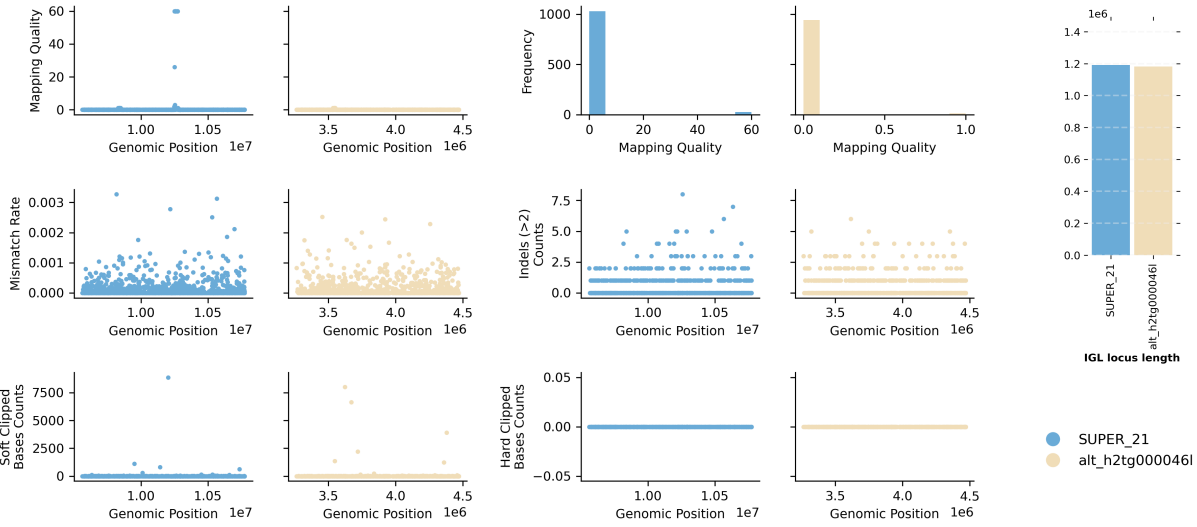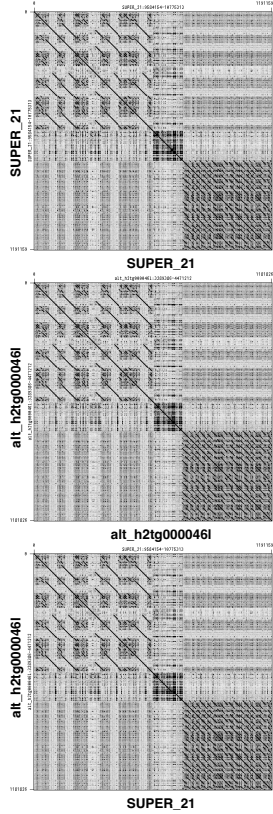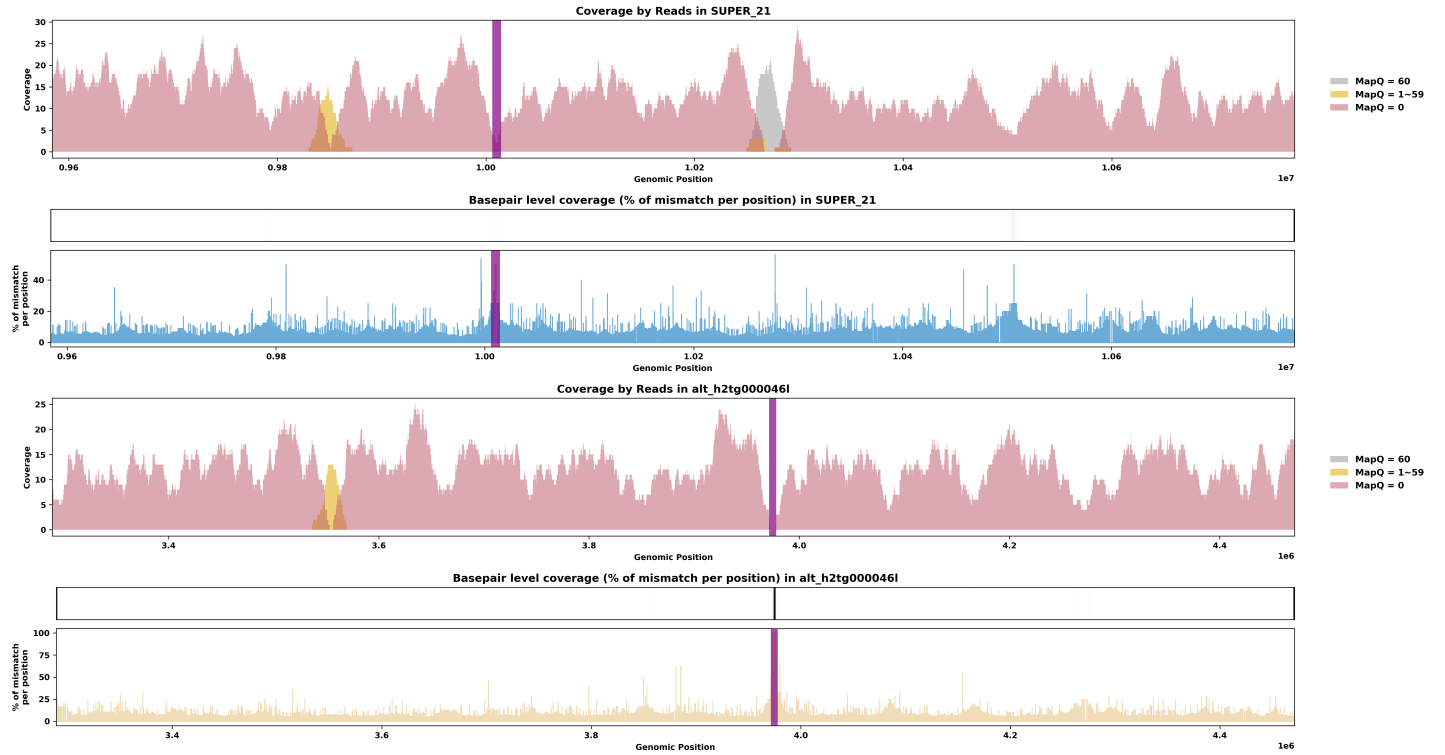



Species ID: mLynRuf1

Common Name: Bobcat

Scientific Name: Lynx rufus

Assembly Type: Not Haplotype Resolved

Data Source: CCGP

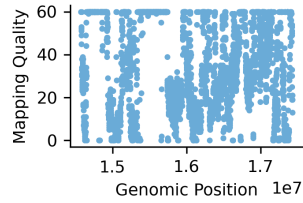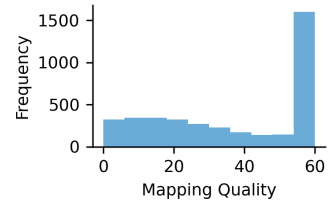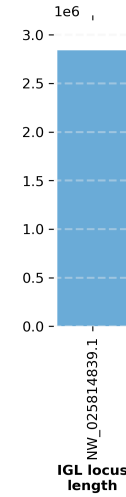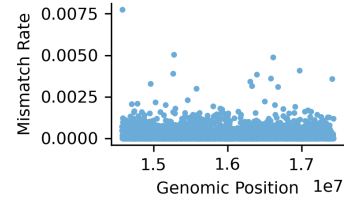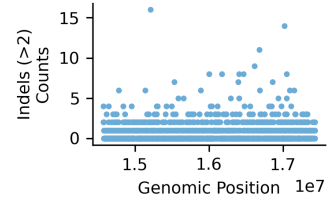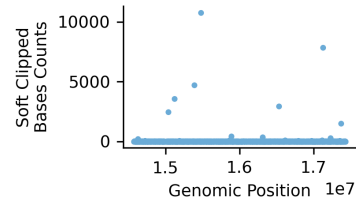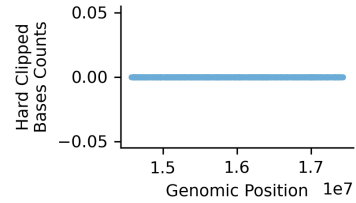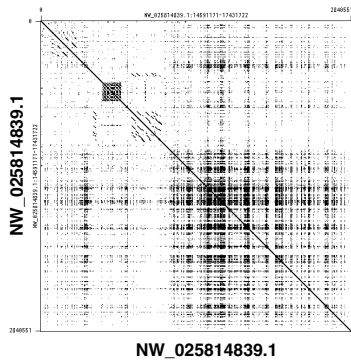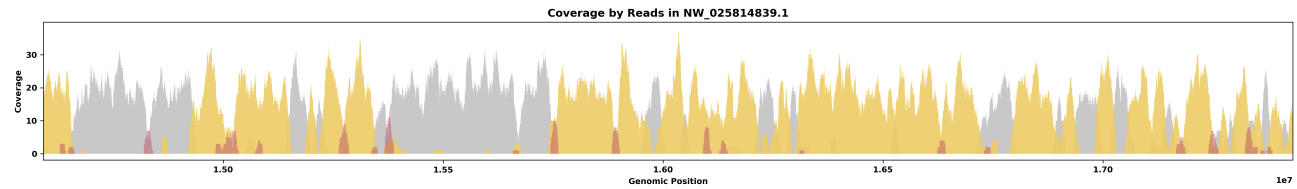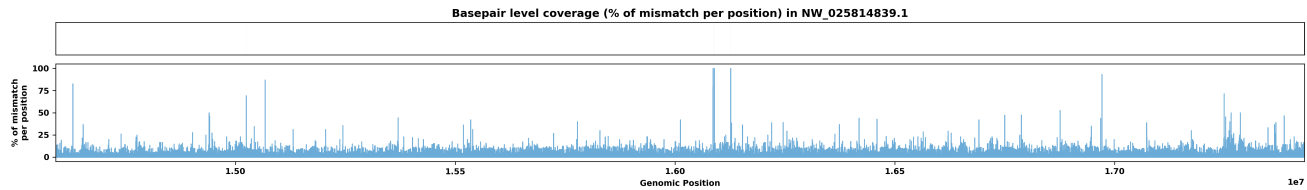

Species ID: mMacEug1

Common Name: tammar wallaby

Scientific Name: Macropus eugenii

Assembly Type: Not Haplotype Resolved

Data Source: VGP

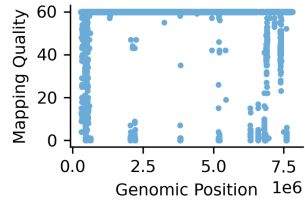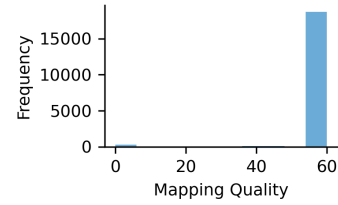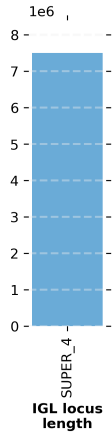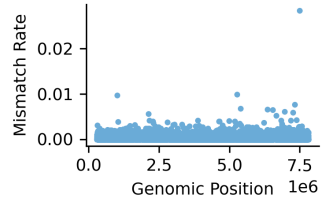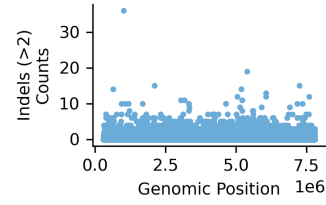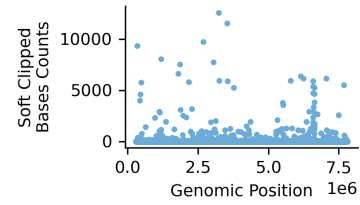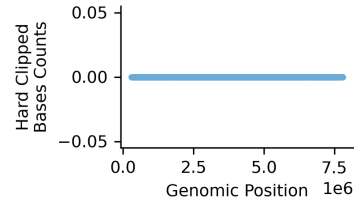

● SUPER\_4

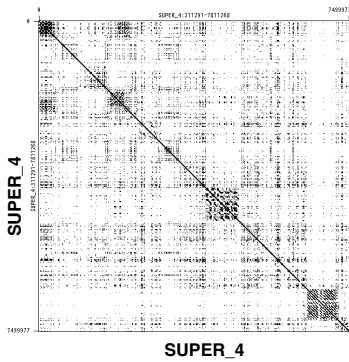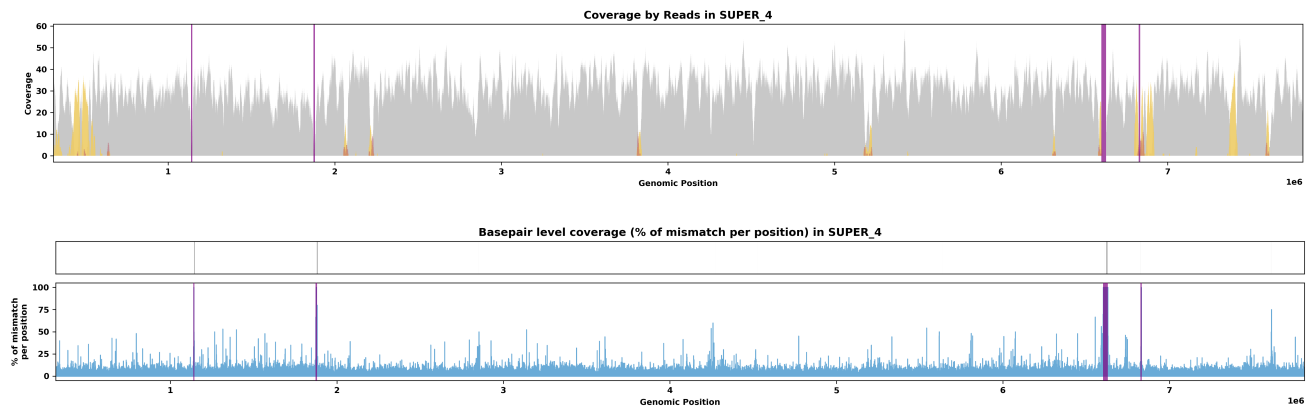

Species ID: mManPen7  
 Common Name: Chinese pangolin  
 Scientific Name: Manis pentadactyla  
 Assembly Type: Haplotype Resolved  
 Data Source: VGP

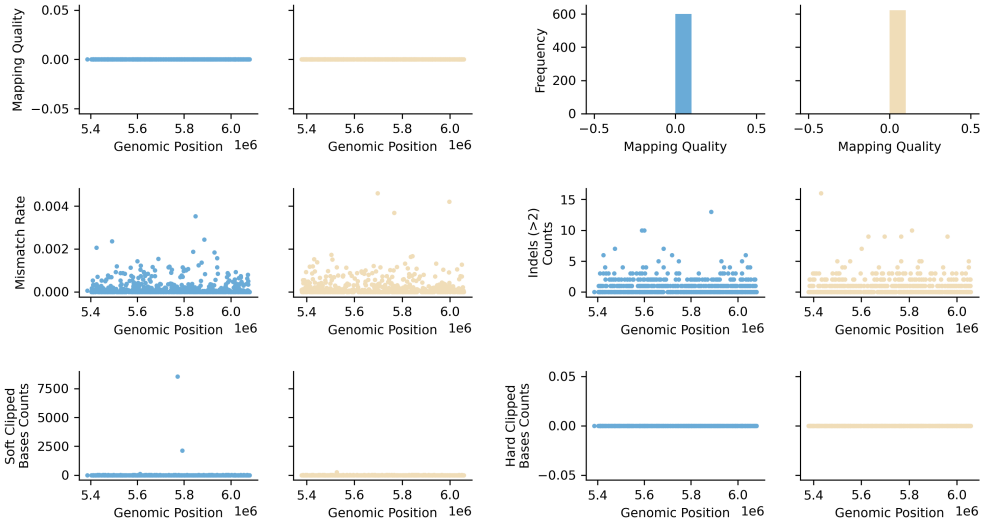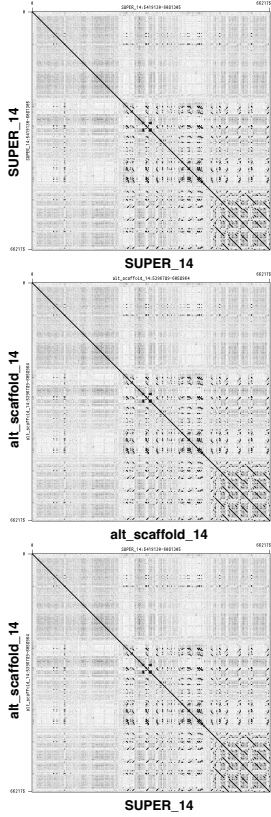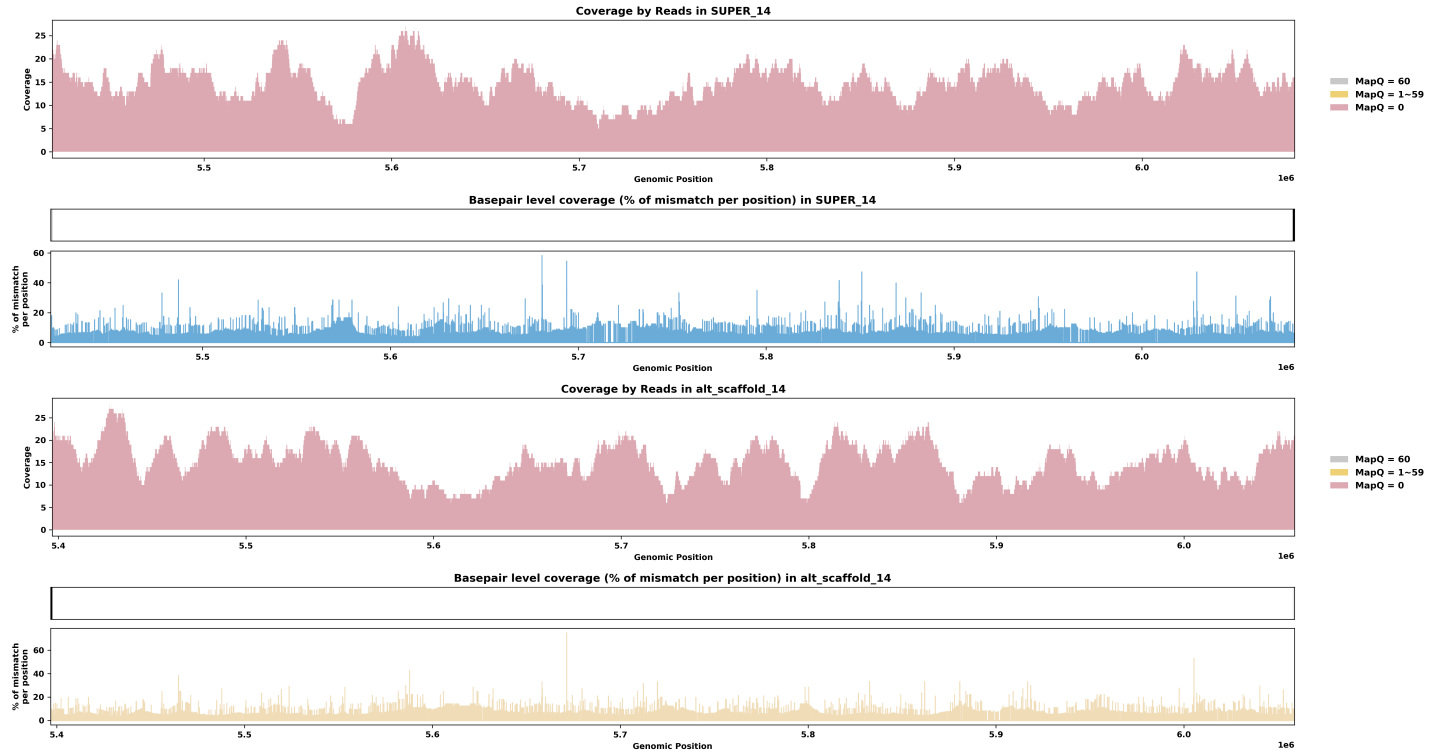

Species ID: mMarMar1  
 Common Name: European pine marten  
 Scientific Name: *Martes martes*  
 Assembly Type: Not Haplotype Resolved  
 Data Source: VGP

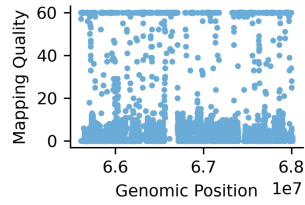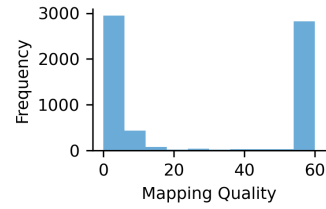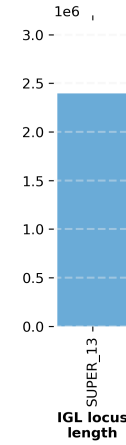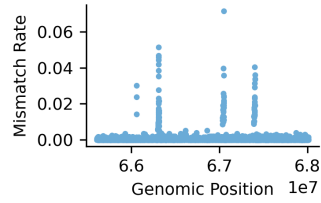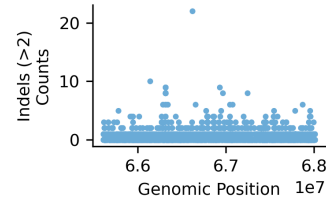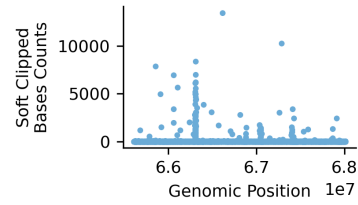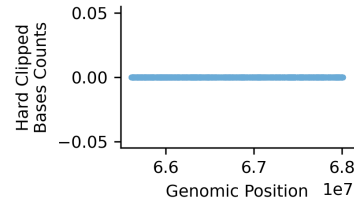

● SUPER\_13

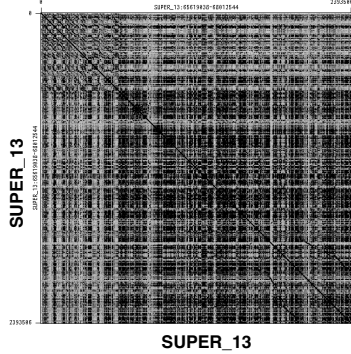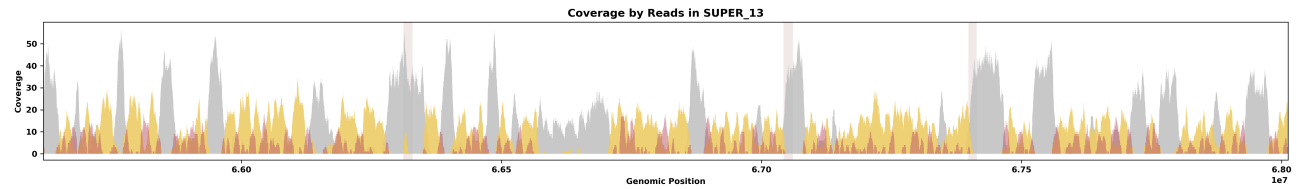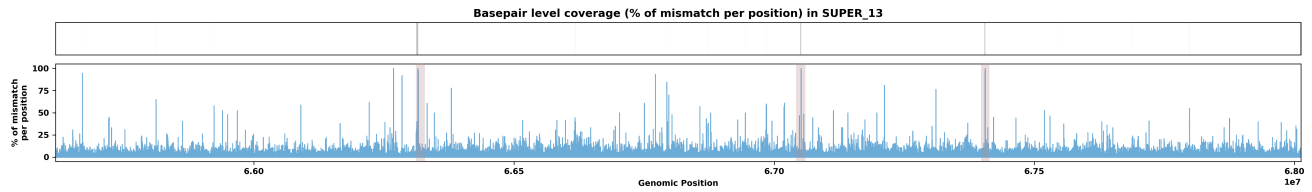

Species ID: mMelMeI3  
 Common Name: European badger  
 Scientific Name: Meles meles  
 Assembly Type: Haplotype Resolved  
 Data Source: VGP

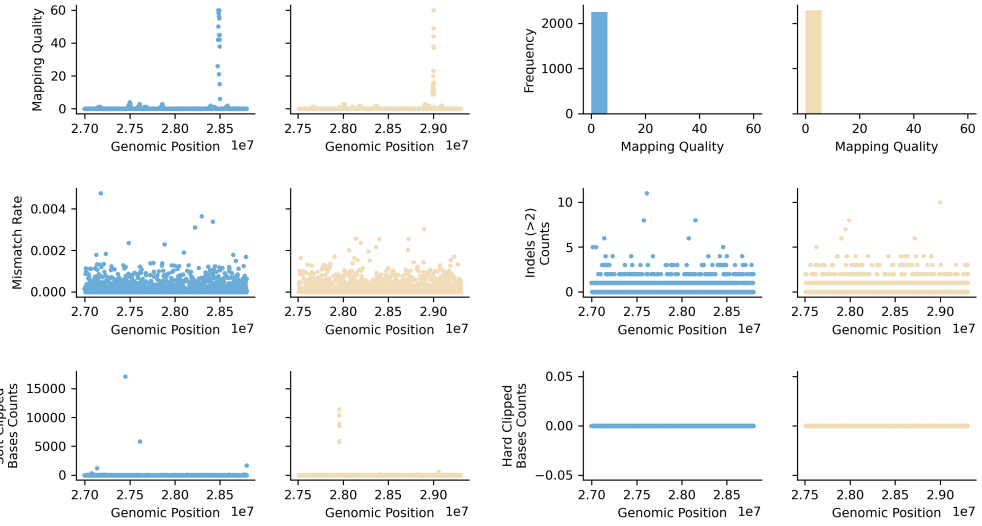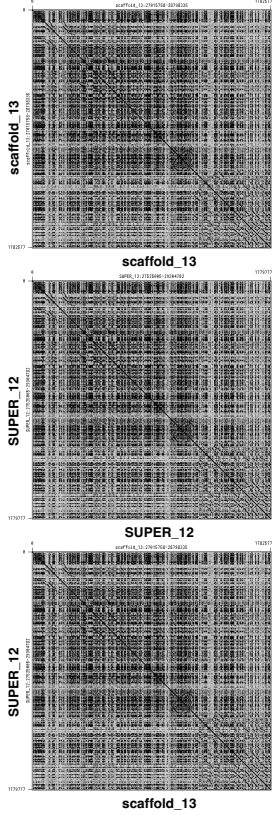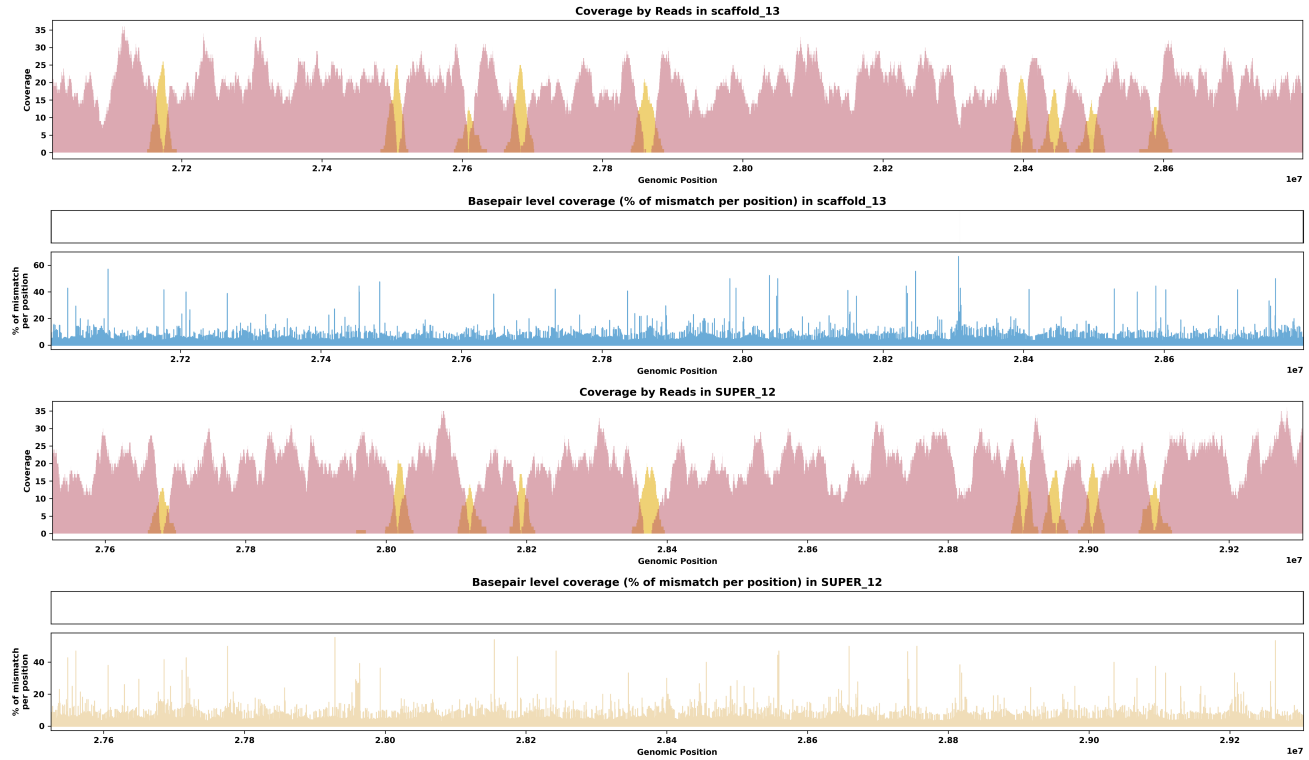

Species ID: mMesDen1  
 Common Name: Blainville's beaked whale  
 Scientific Name: Mesoplodon densirostris  
 Assembly Type: Not Haplotype Resolved  
 Data Source: VGP

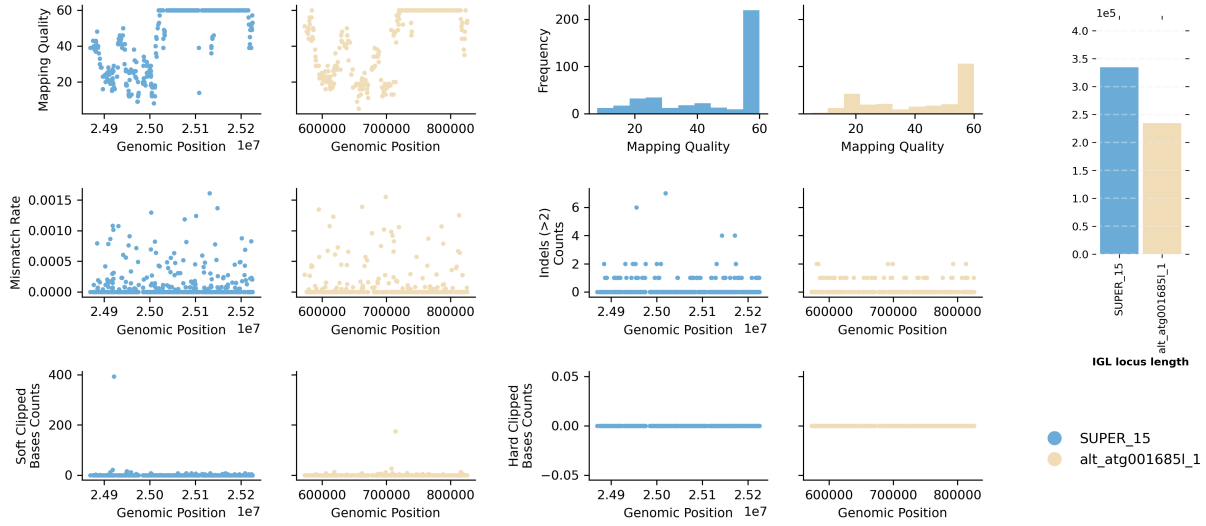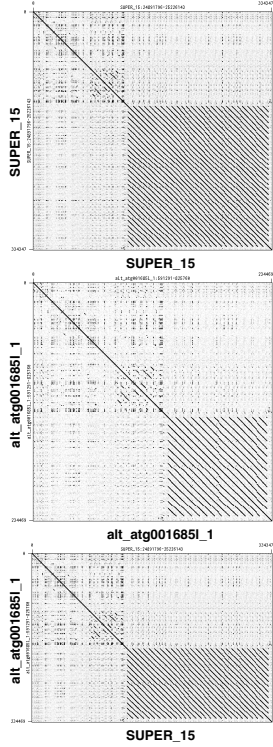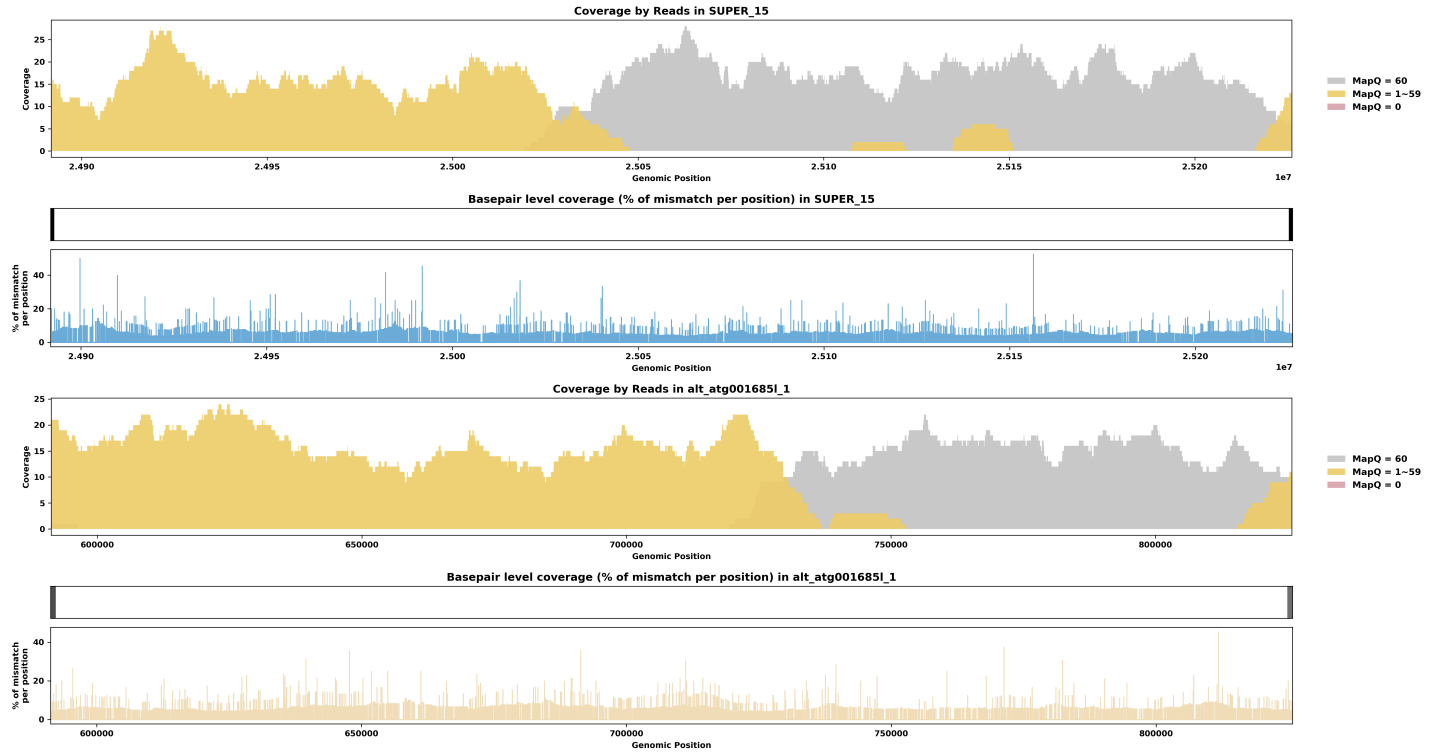

Species ID: mMicCal1  
 Common Name: California Vole  
 Scientific Name: *Microtus californicus*  
 Assembly Type: Haplotype Resolved  
 Data Source: CCGP

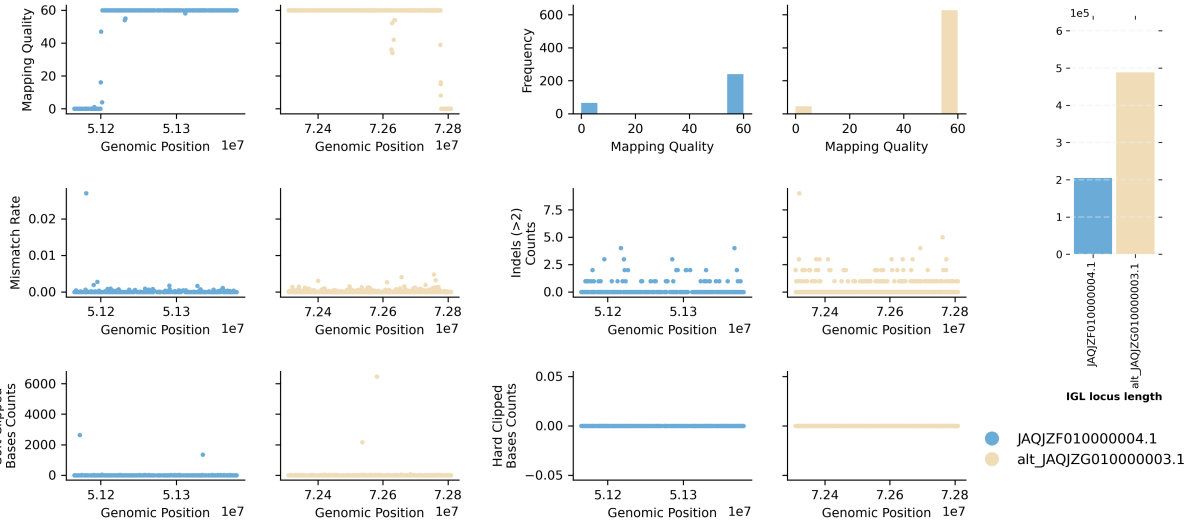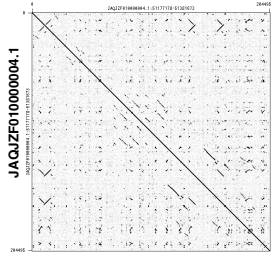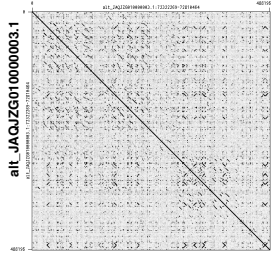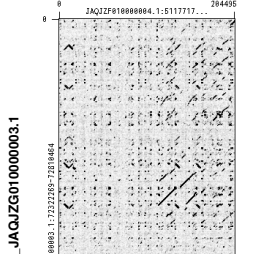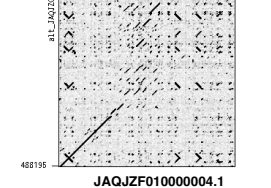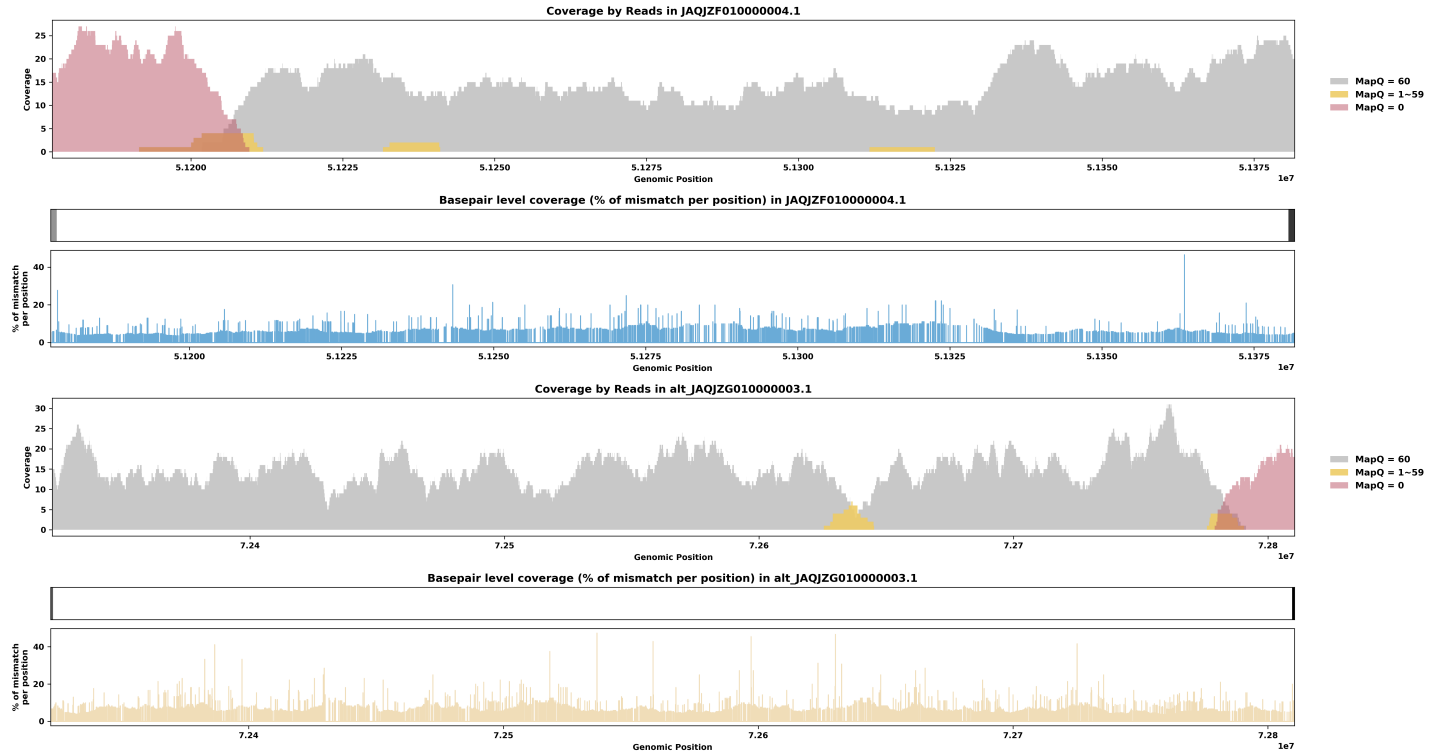

Species ID: mMicMin1  
 Common Name: European harvest mouse  
 Scientific Name: *Micromys minutus*  
 Assembly Type: Not Haplotype Resolved  
 Data Source: VGP

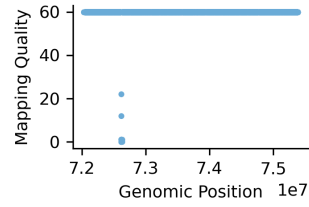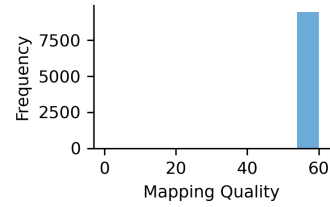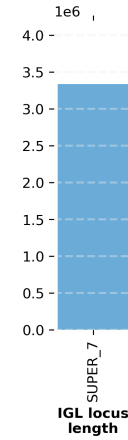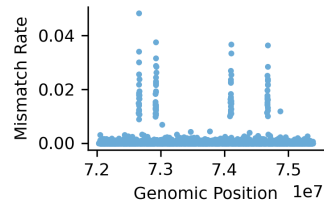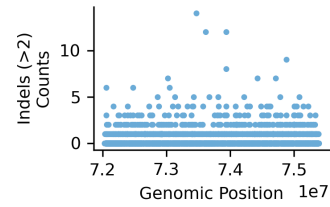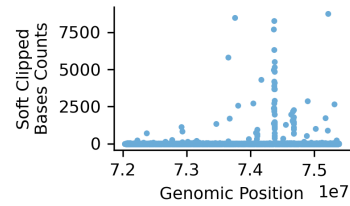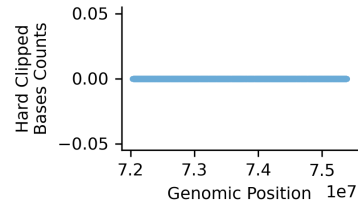

● SUPER\_7

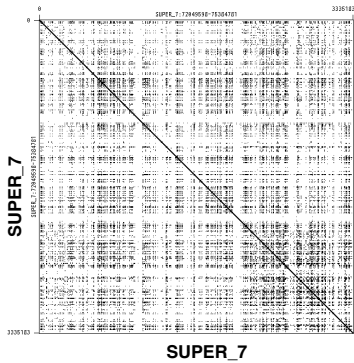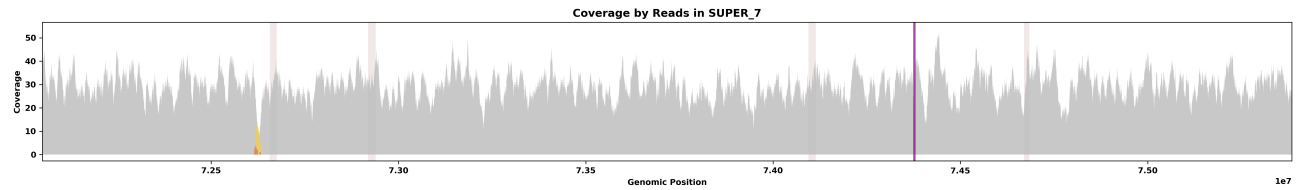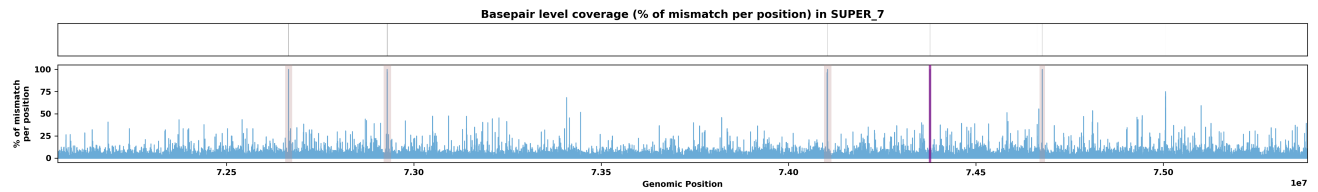



Species ID: mMirAng1  
 Common Name: Northern Elephant Seal  
 Scientific Name: *Mirounga angustirostris*  
 Assembly Type: Haplotype Resolved  
 Data Source: COGP

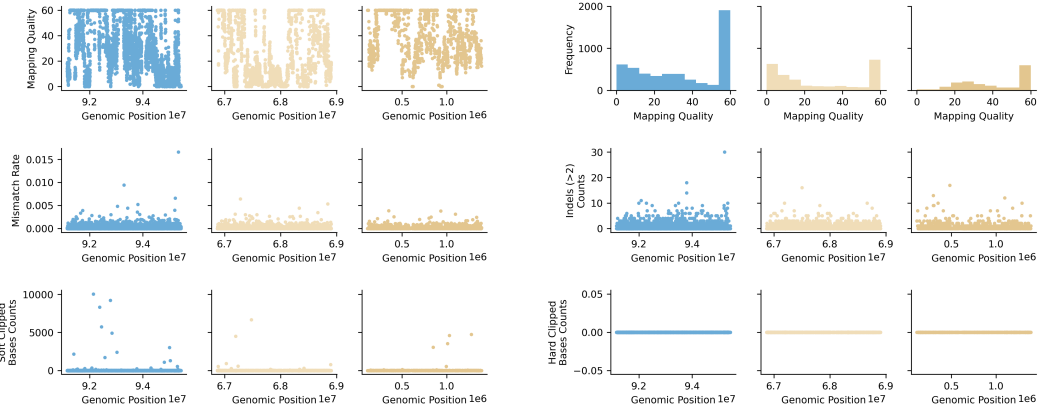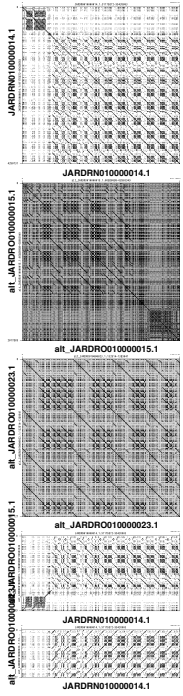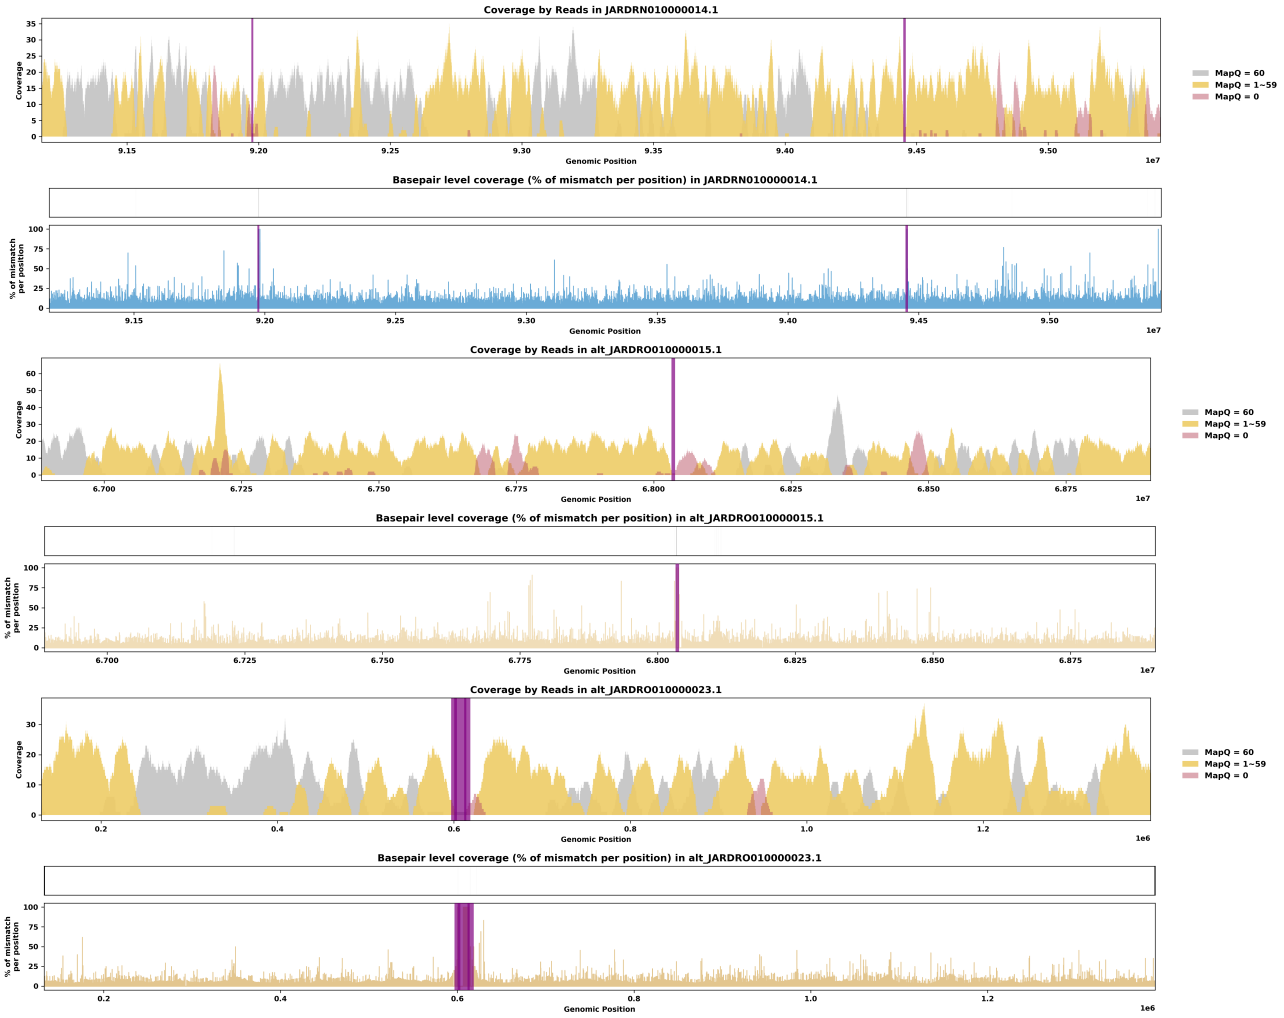

Species ID: mMonDom1

Common Name: gray short-tailed opossum

Scientific Name: *Monodelphis domestica*

Assembly Type: Not Haplotype Resolved

Data Source: VGP

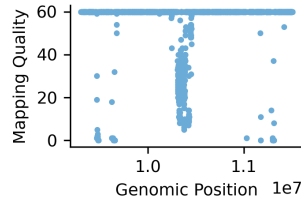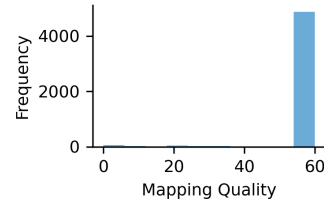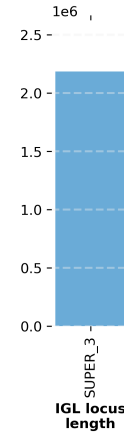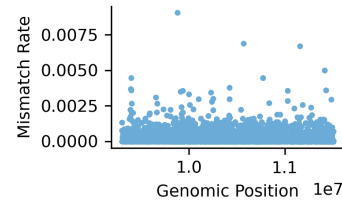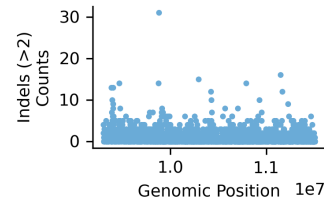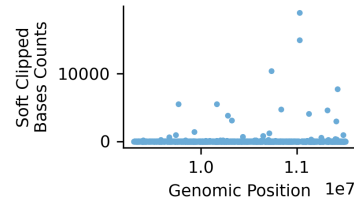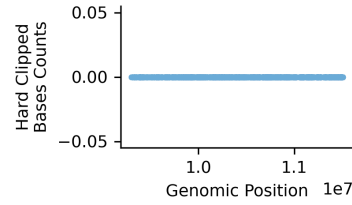

● SUPER\_3

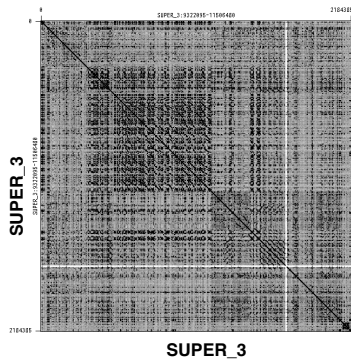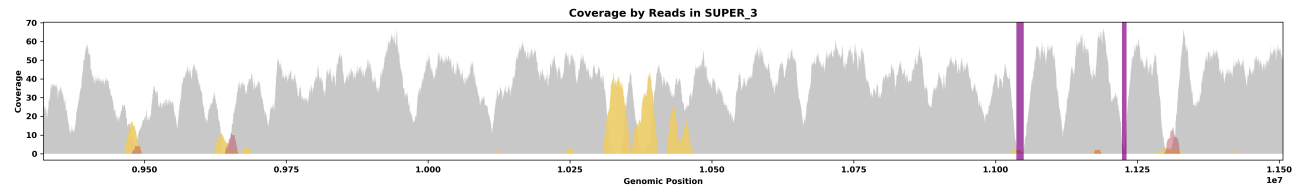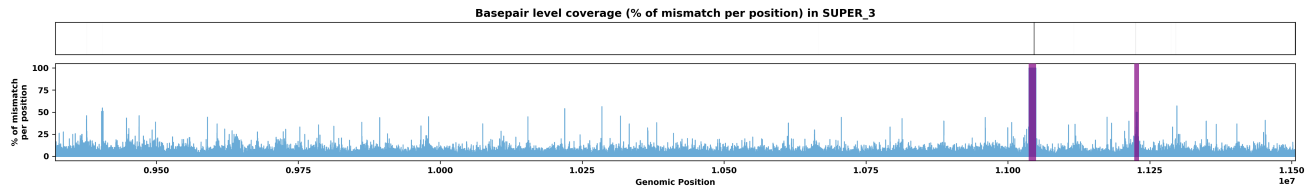

Species ID: mMunRee1  
 Common Name: Reeves' muntjac  
 Scientific Name: Muntiacus reevesi  
 Assembly Type: Not Haplotype Resolved  
 Data Source: VGP

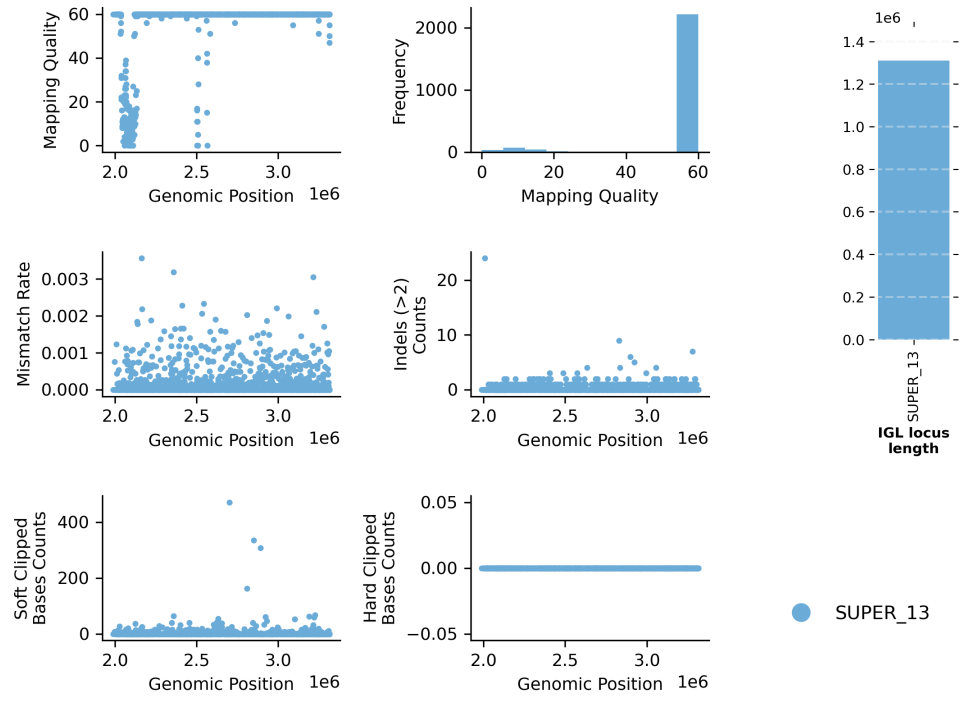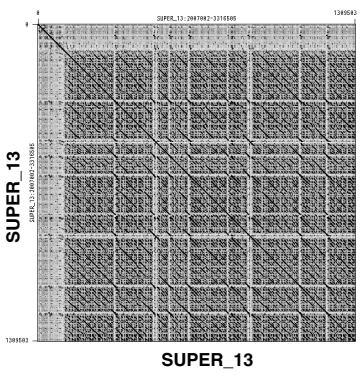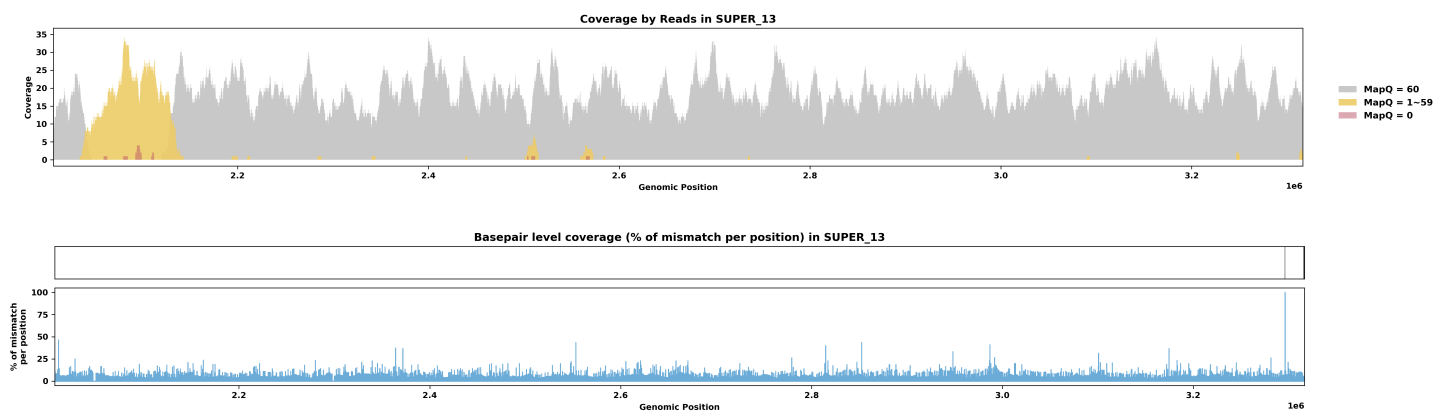

Species ID: mMusAve1  
 Common Name: hazel dormouse  
 Scientific Name: Muscardinus avellanarius  
 Assembly Type: Not Haplotype Resolved  
 Data Source: VGP

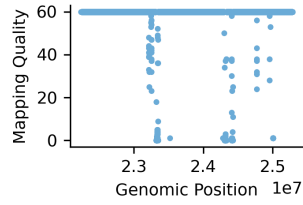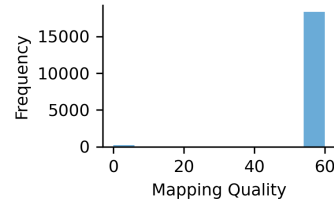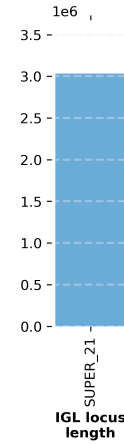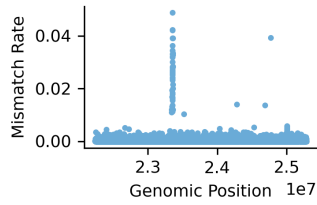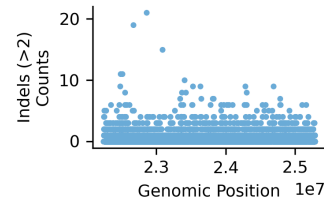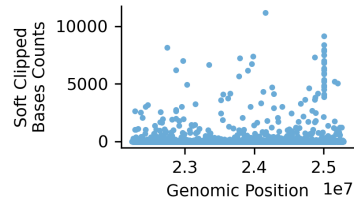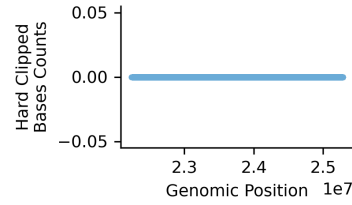

● SUPER\_21

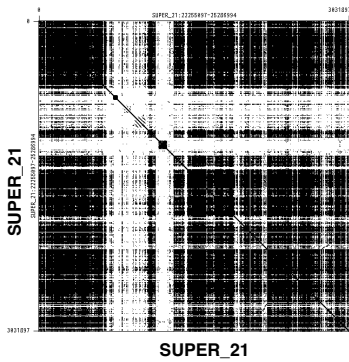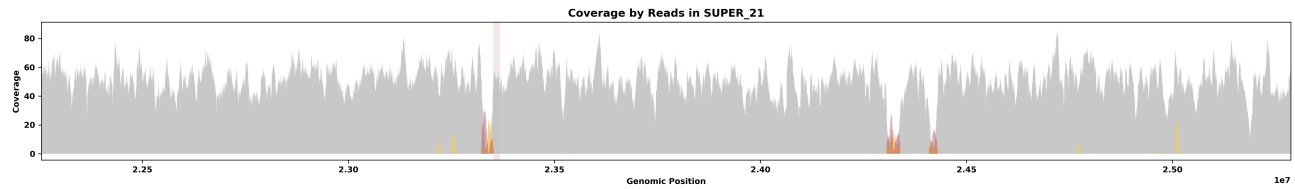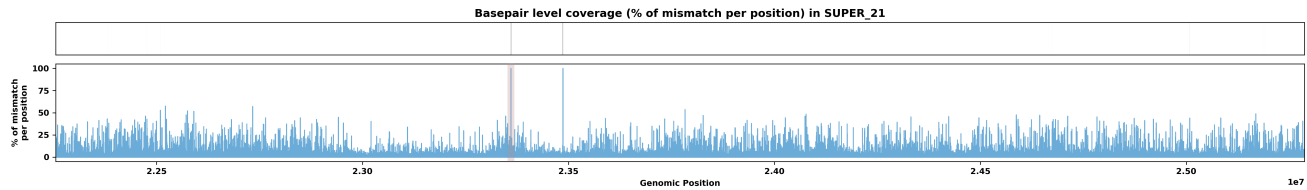

Species ID: mMusLut2  
 Common Name: European mink  
 Scientific Name: Mustela lutreola  
 Assembly Type: Not Haplotype Resolved  
 Data Source: VGP

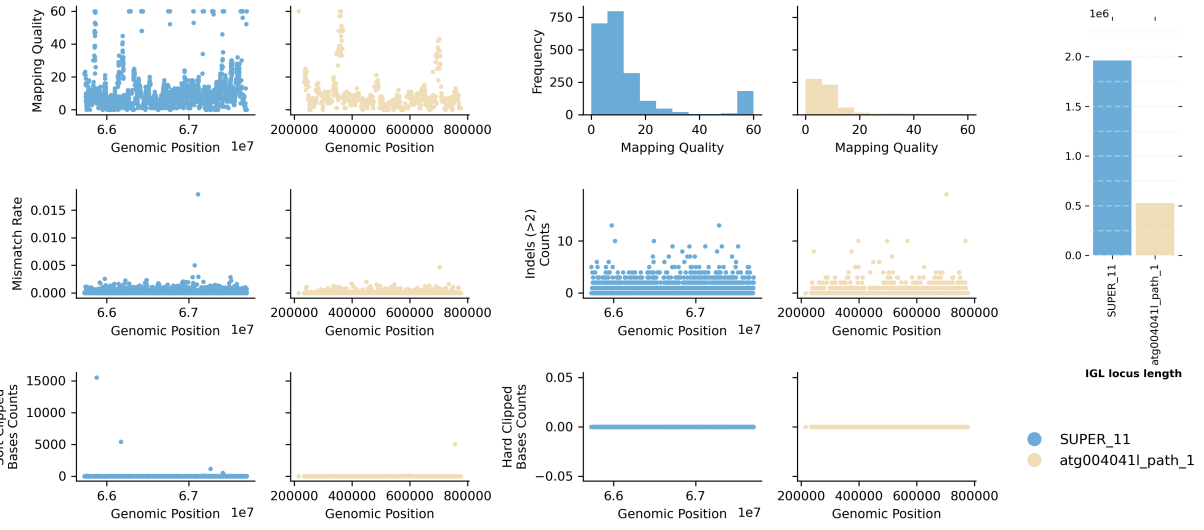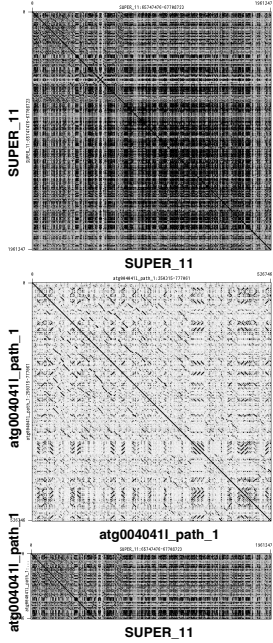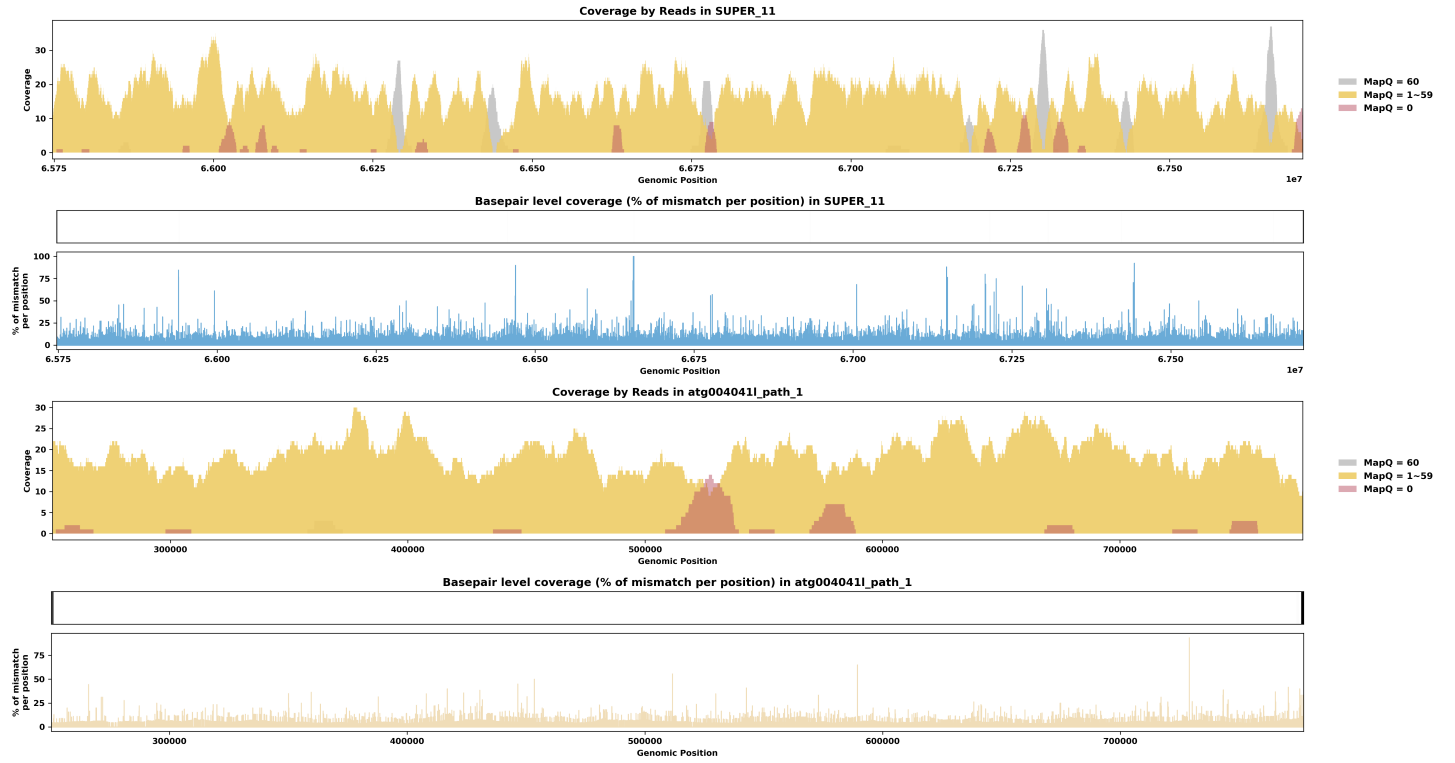

Species ID: mMusNiv1  
 Common Name: Least weasel  
 Scientific Name: Mustela nivalis  
 Assembly Type: Haplotype Resolved  
 Data Source: VGP

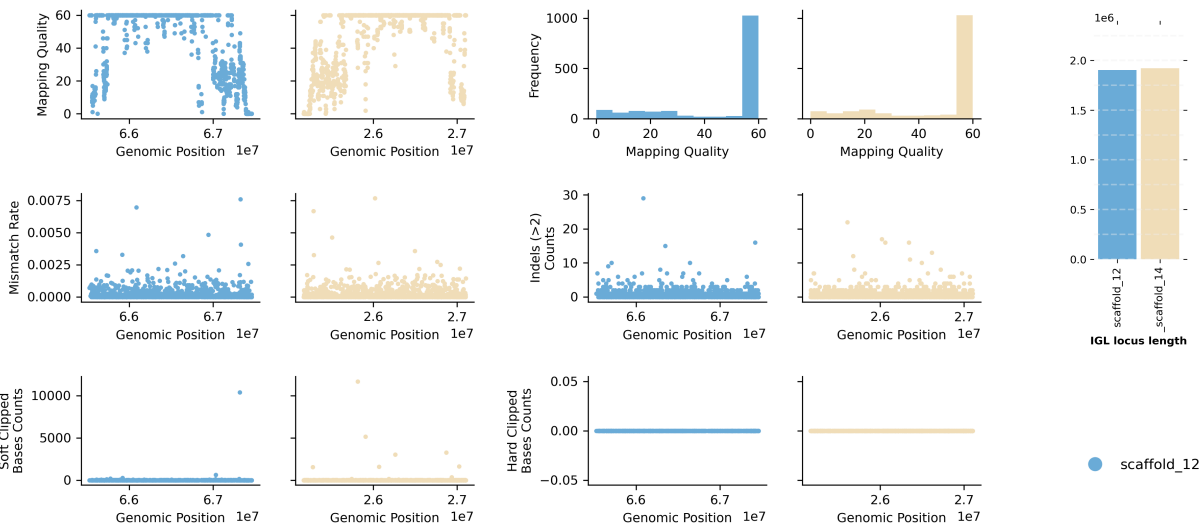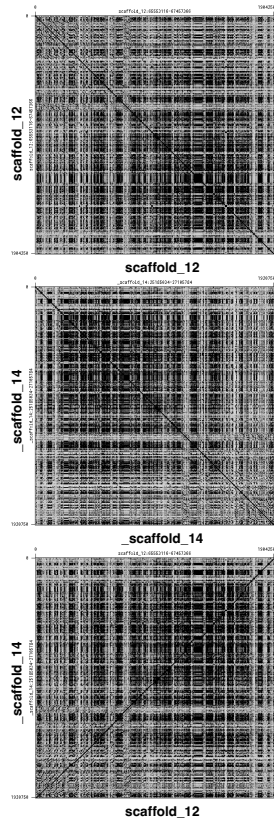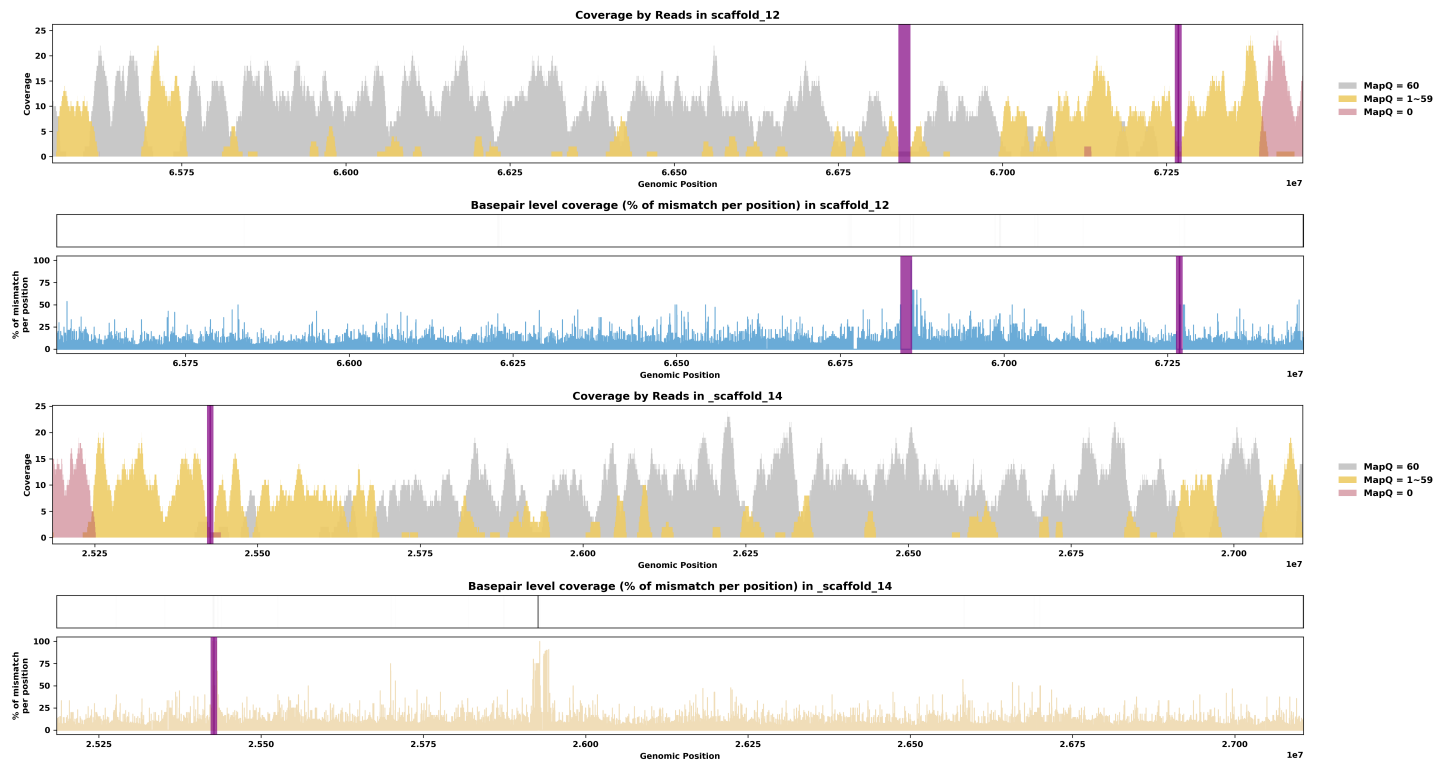

Species ID: mMyoDau2

Common Name: Daubenton's bat

Scientific Name: Myotis daubentonii

Assembly Type: Not Haplotype Resolved

Data Source: VGP

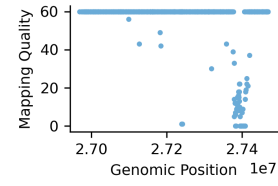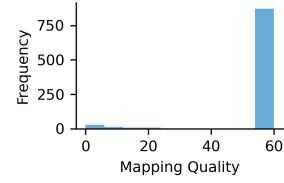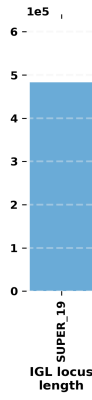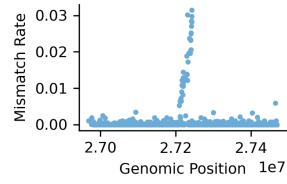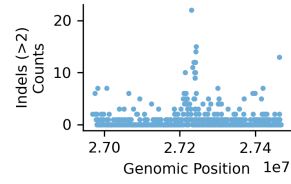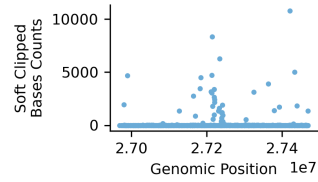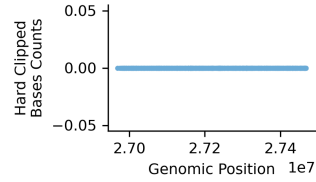

● SUPER\_19

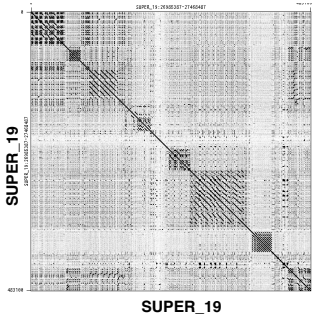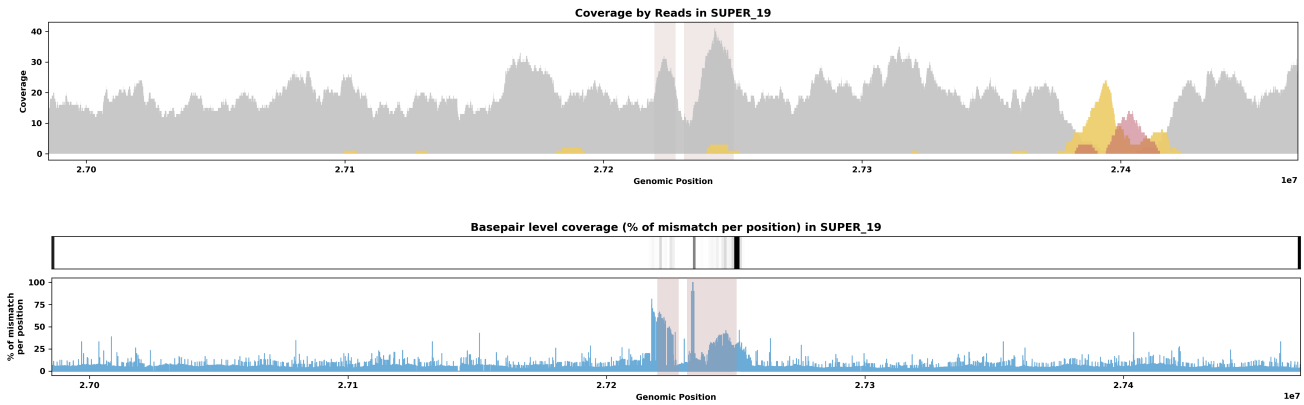

Species ID: mMyoYum1  
 Common Name: Yuma myotis  
 Scientific Name: Myotis yumanensis  
 Assembly Type: Haplotype Resolved  
 Data Source: CCGP

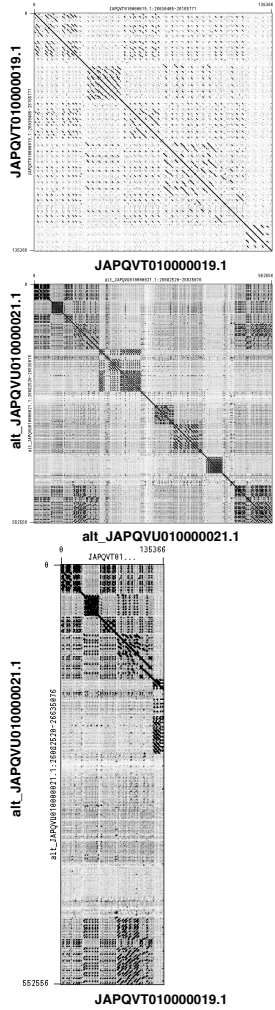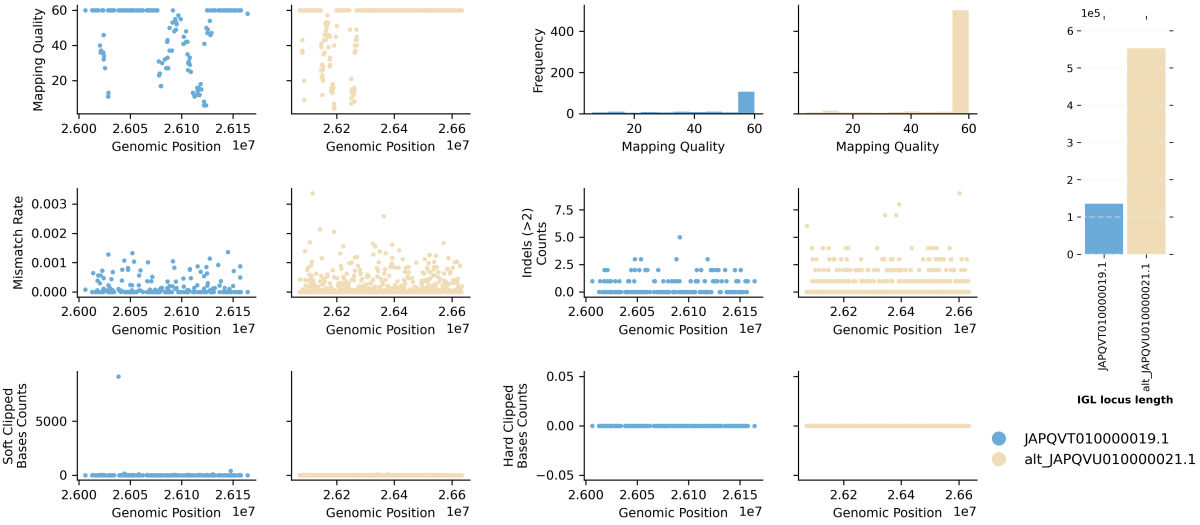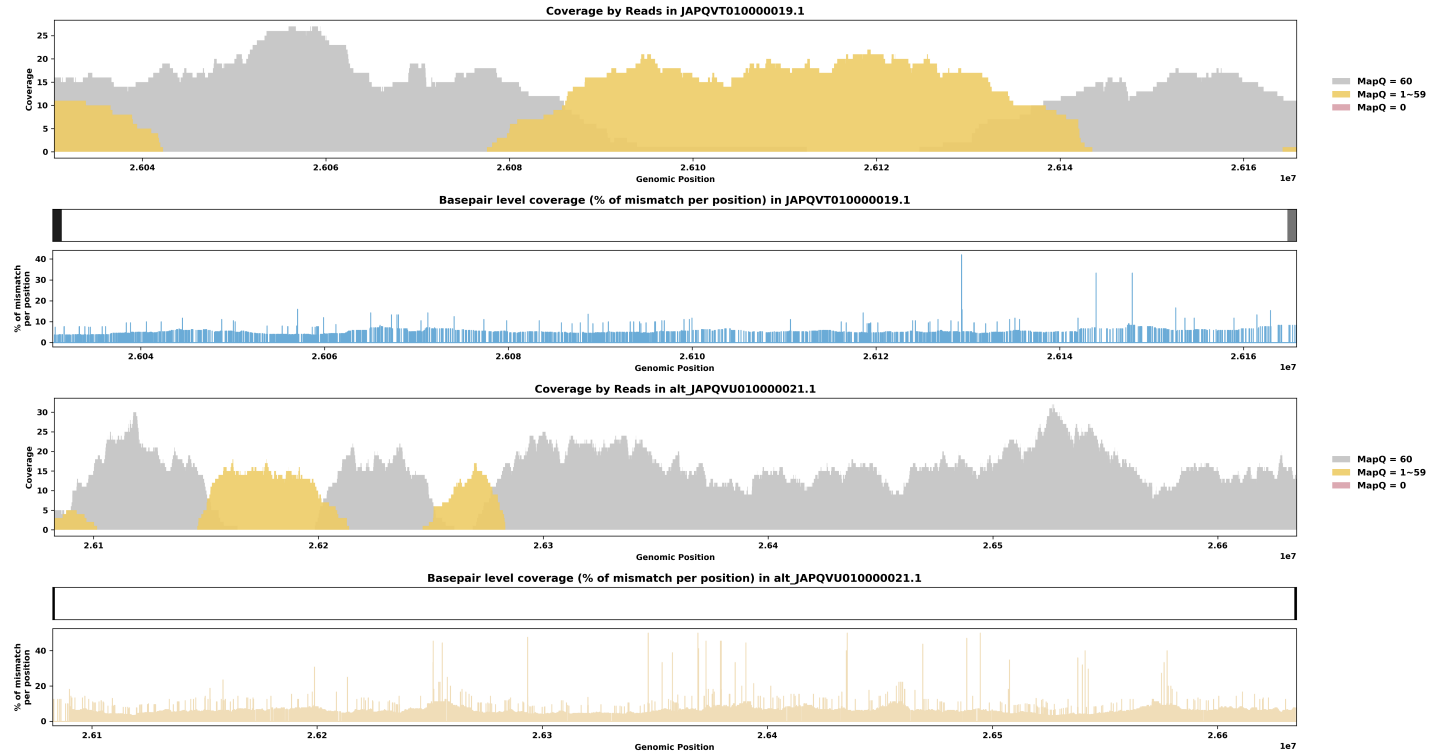



Species ID: mNeoNeb1

Common Name: Clouded Leopard

Scientific Name: Neofelis\_nebulosa

Assembly Type: Not Haplotype Resolved

Data Source: VGP

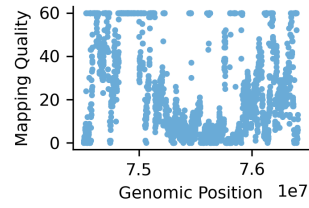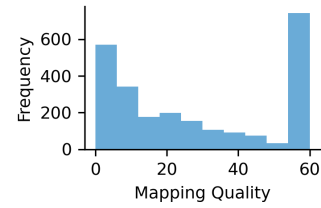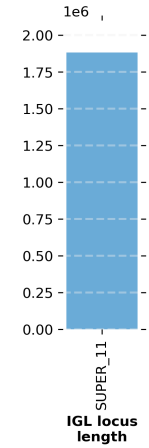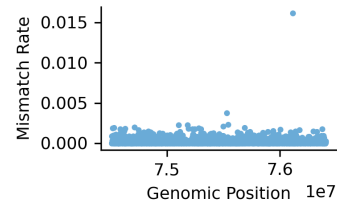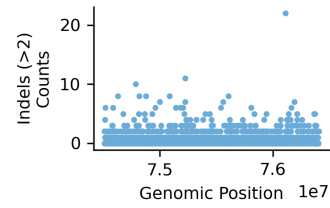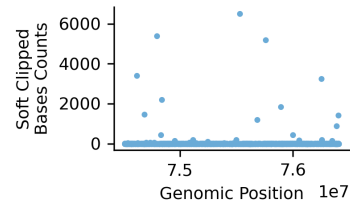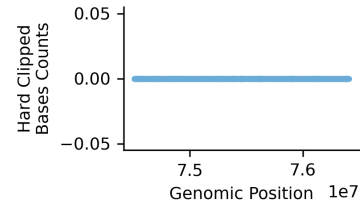

● SUPER\_11

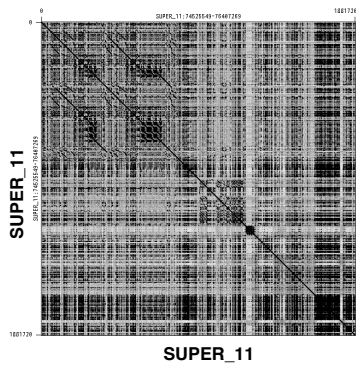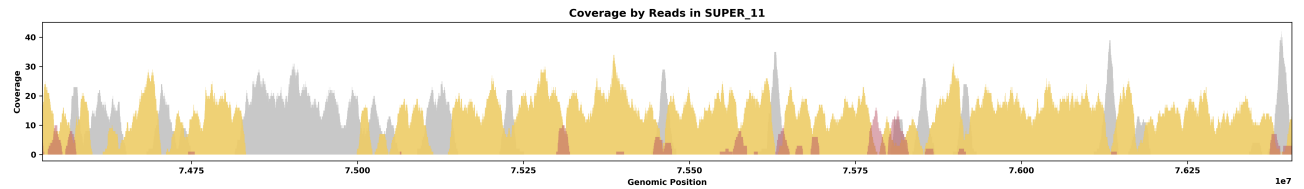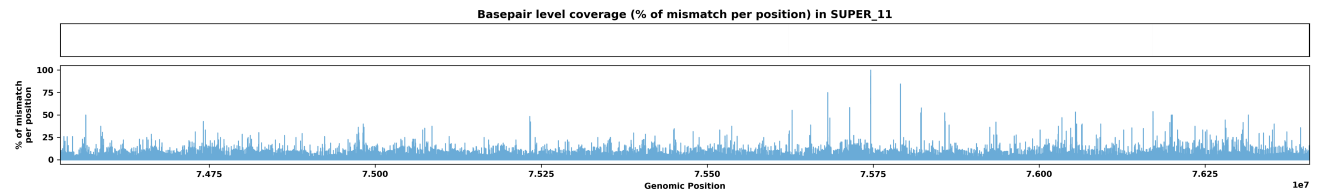

Species ID: mNycCou1  
 Common Name: slow loris  
 Scientific Name: Nycticebus coucang  
 Assembly Type: Not Haplotype Resolved  
 Data Source: VGP

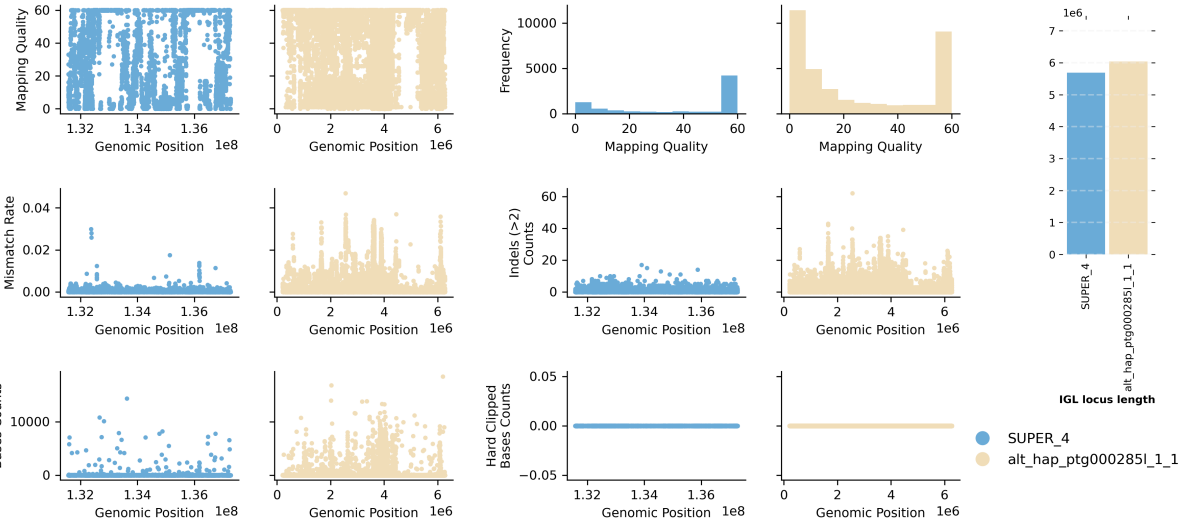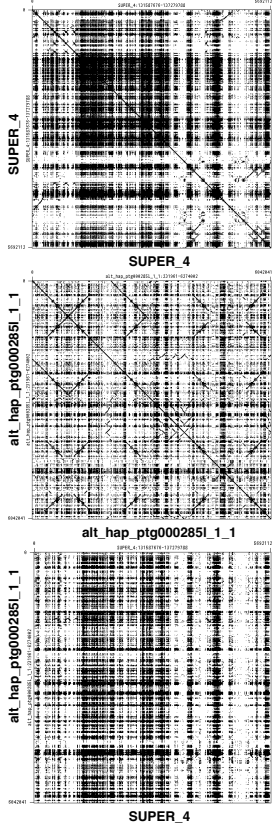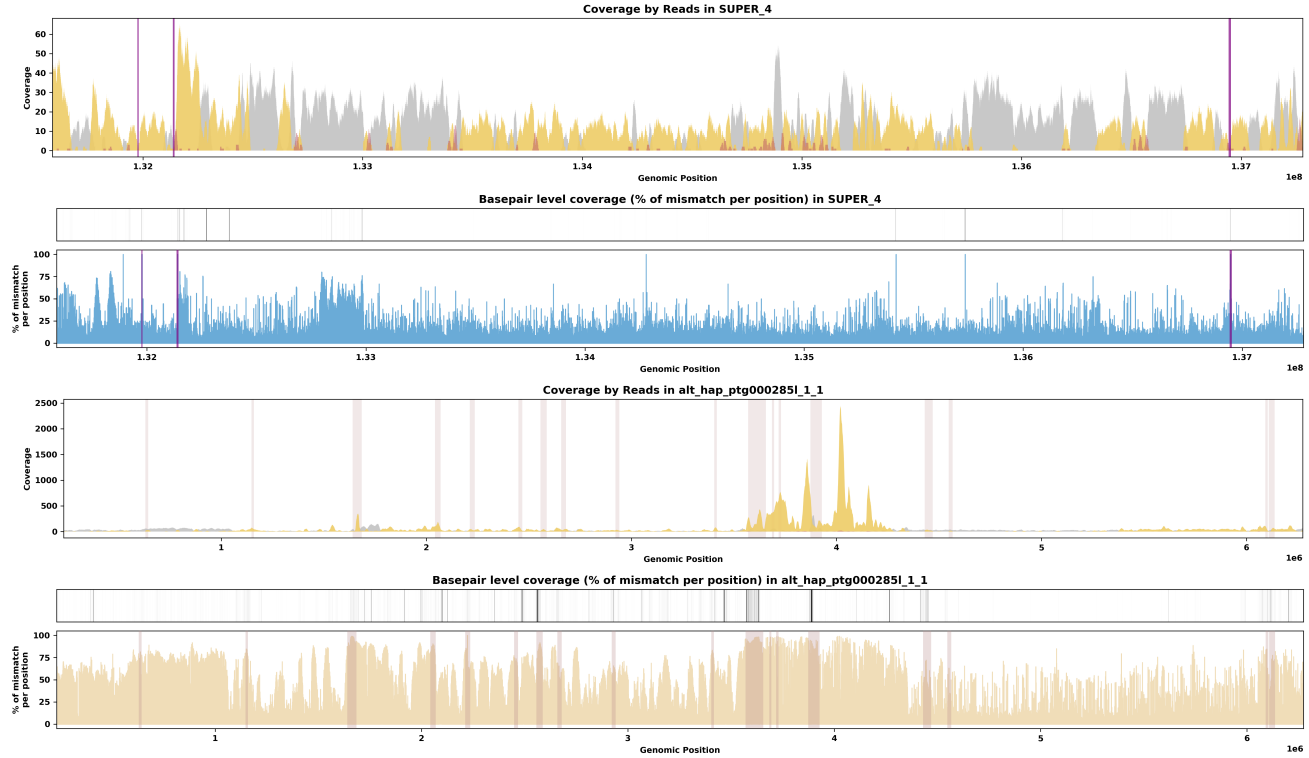

Species ID: mOrcOrc1

Common Name: killer whale

Scientific Name: Orcinus orca

Assembly Type: Not Haplotype Resolved

Data Source: VGP

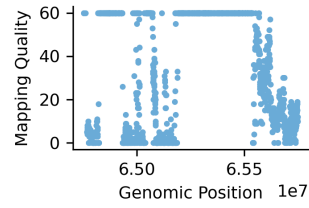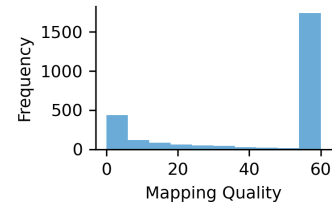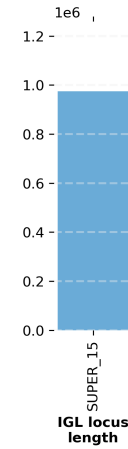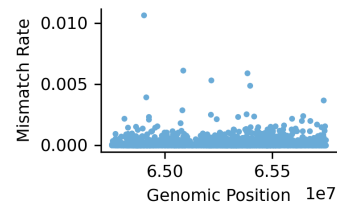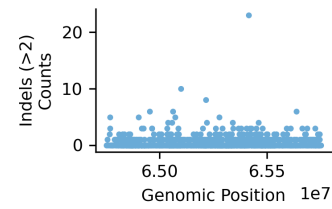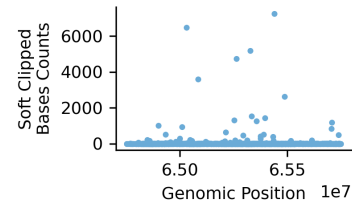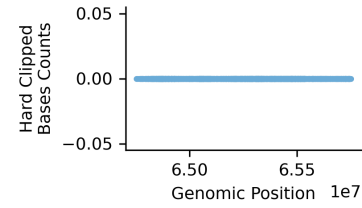

● SUPER\_15

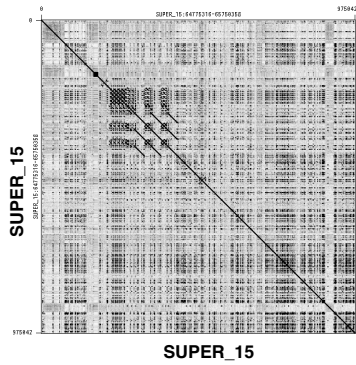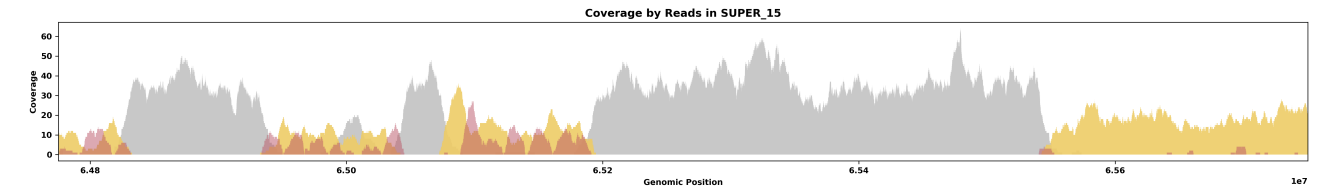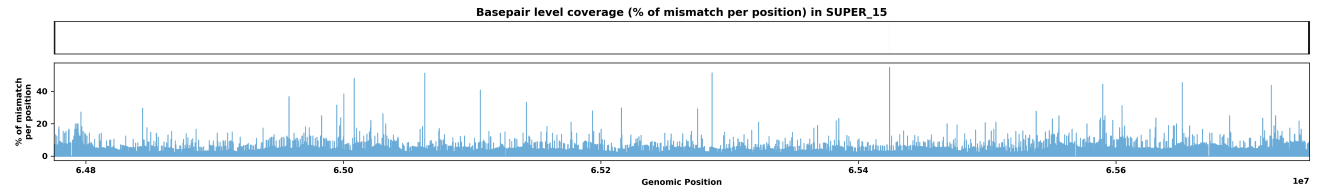

Species ID: mOryCun1

Common Name: rabbit

Scientific Name: *Oryctolagus cuniculus*

Assembly Type: Not Haplotype Resolved

Data Source: VGP

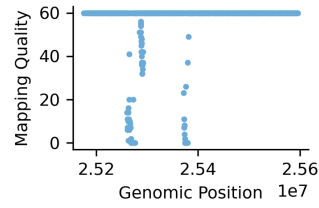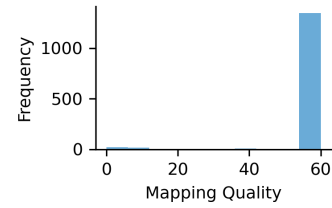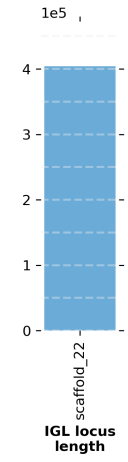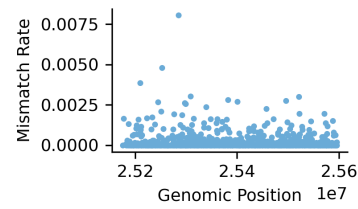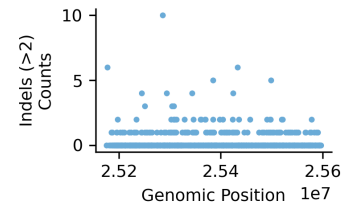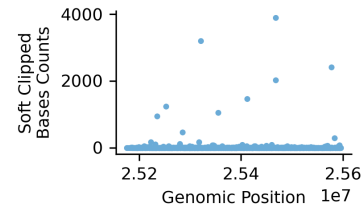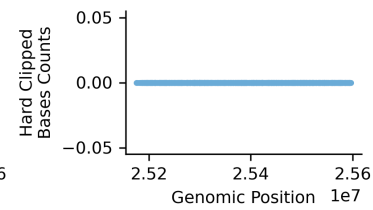

● scaffold\_22

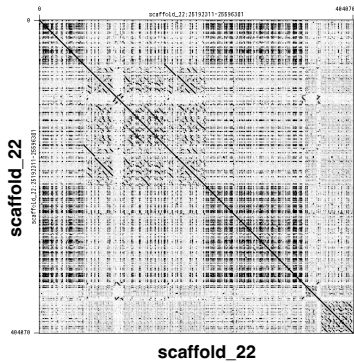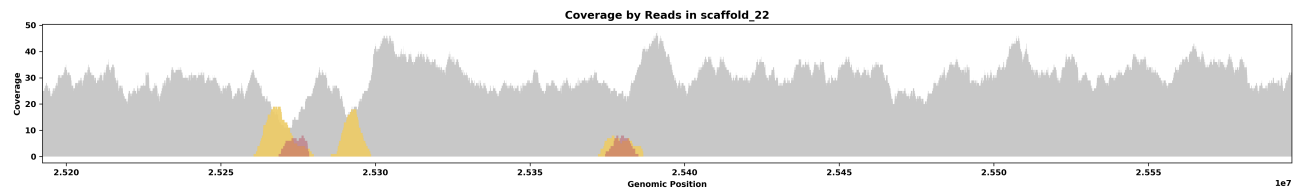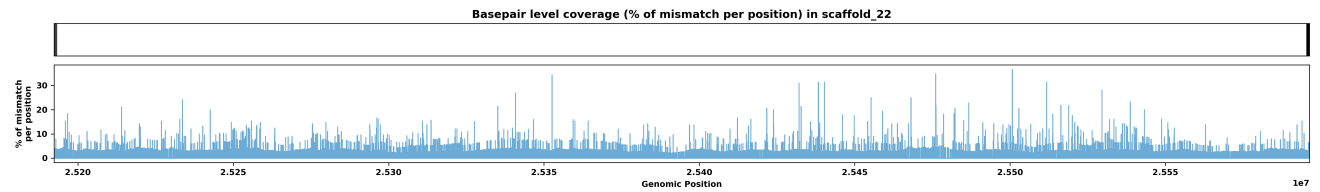

Species ID: mPanPan1  
 Common Name: Bonobo  
 Scientific Name: Pan paniscus  
 Assembly Type: Haplotype Resolved  
 Data Source: T2T Primate

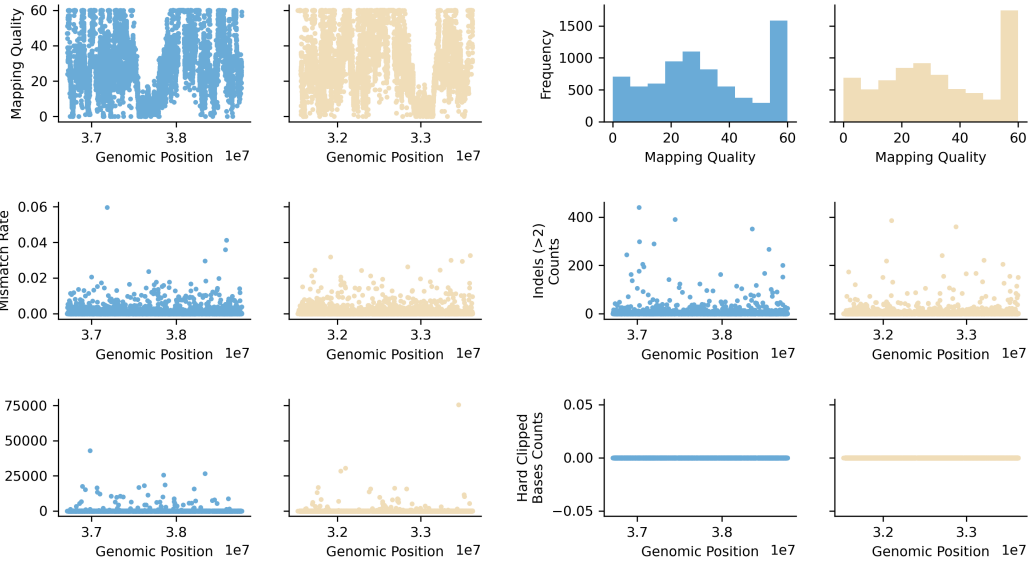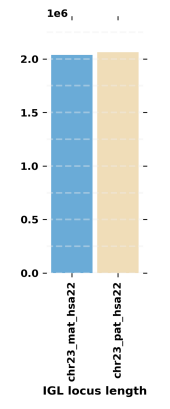

● chr23\_mat\_hsa22  
 ● chr23\_pat\_hsa22

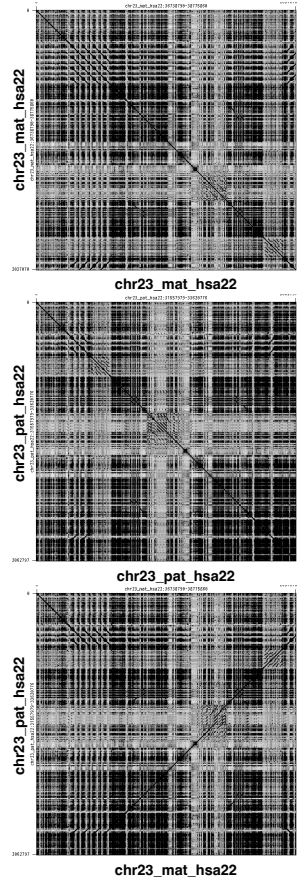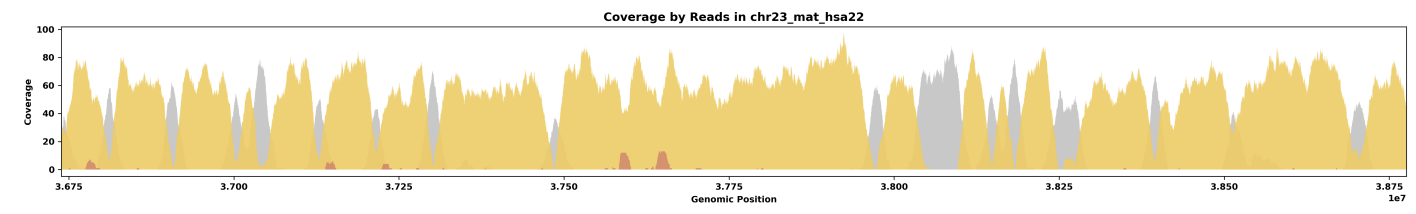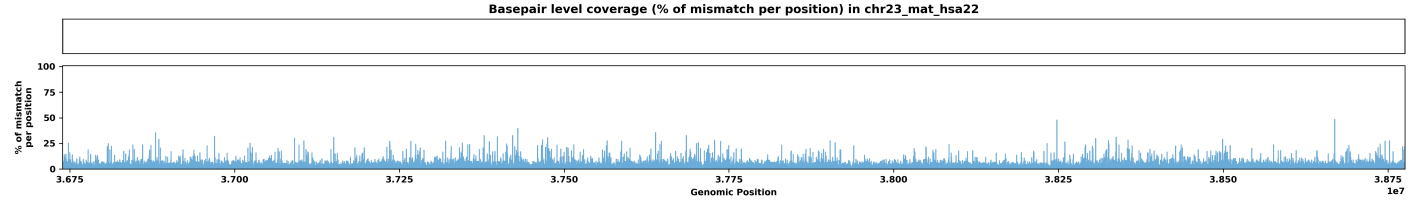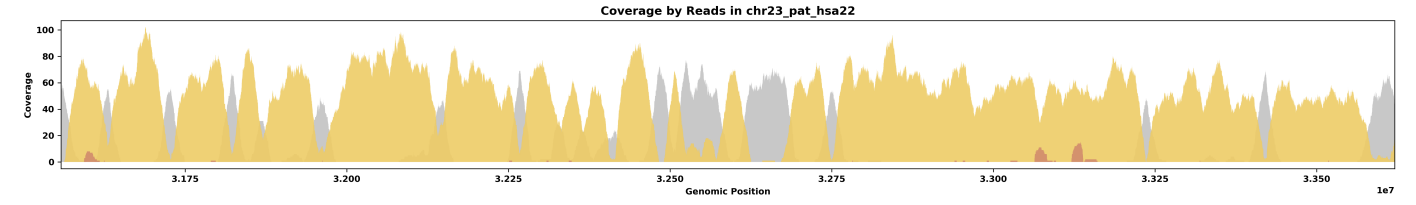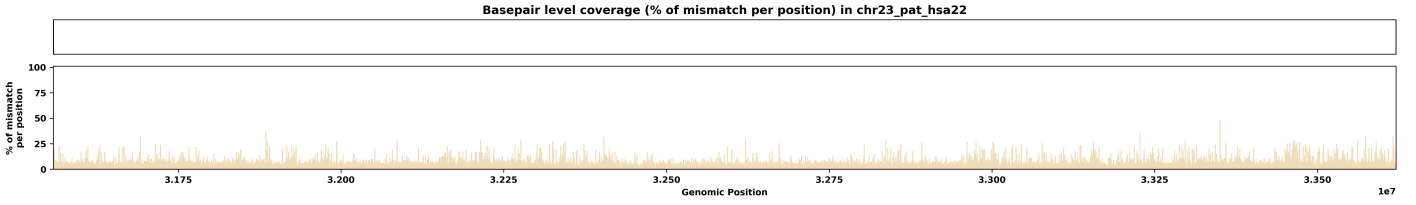

Species ID: mPerMan1  
 Common Name: deer mouse  
 Scientific Name: *Peromyscus maniculatus*  
 Assembly Type: Not Haplotype Resolved  
 Data Source: CCGP

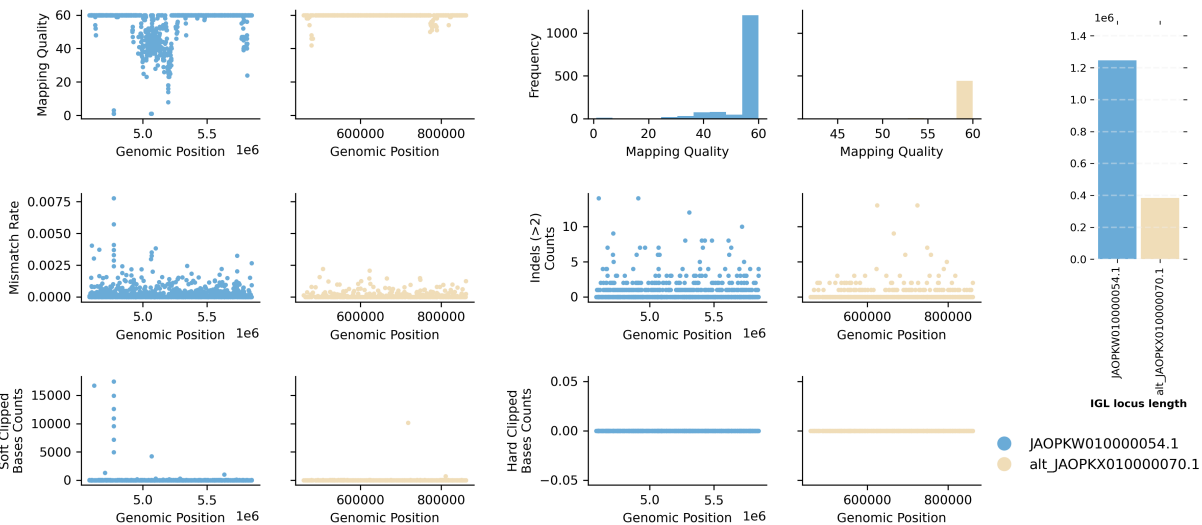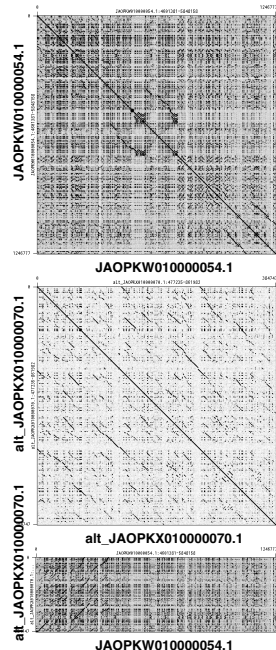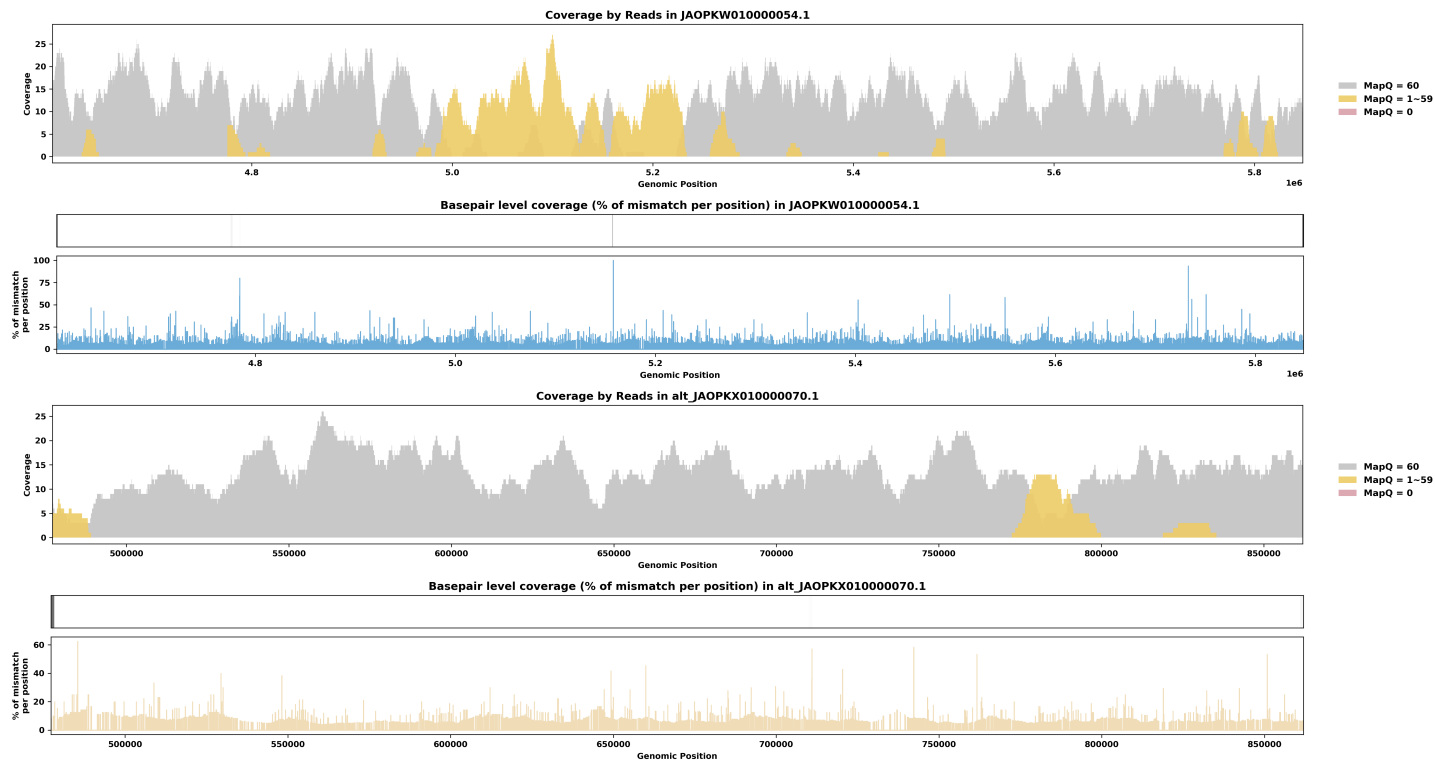

Species ID: mPhoPho1  
 Common Name: harbor porpoise  
 Scientific Name: Phocoena phocoena  
 Assembly Type: Not Haplotype Resolved  
 Data Source: VGP

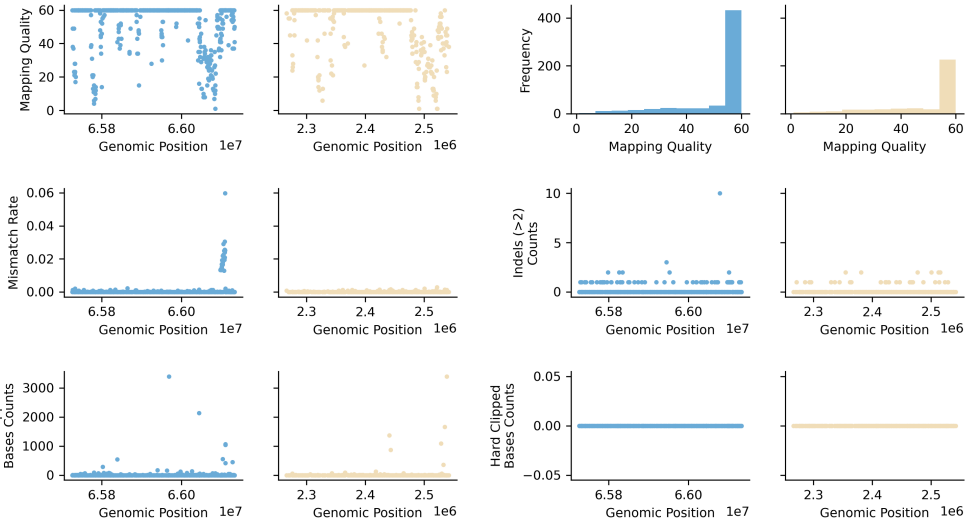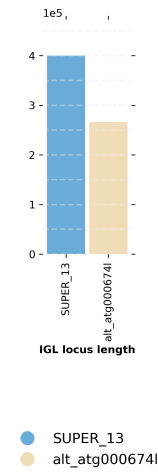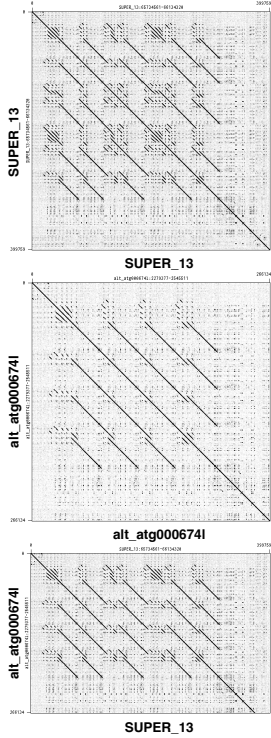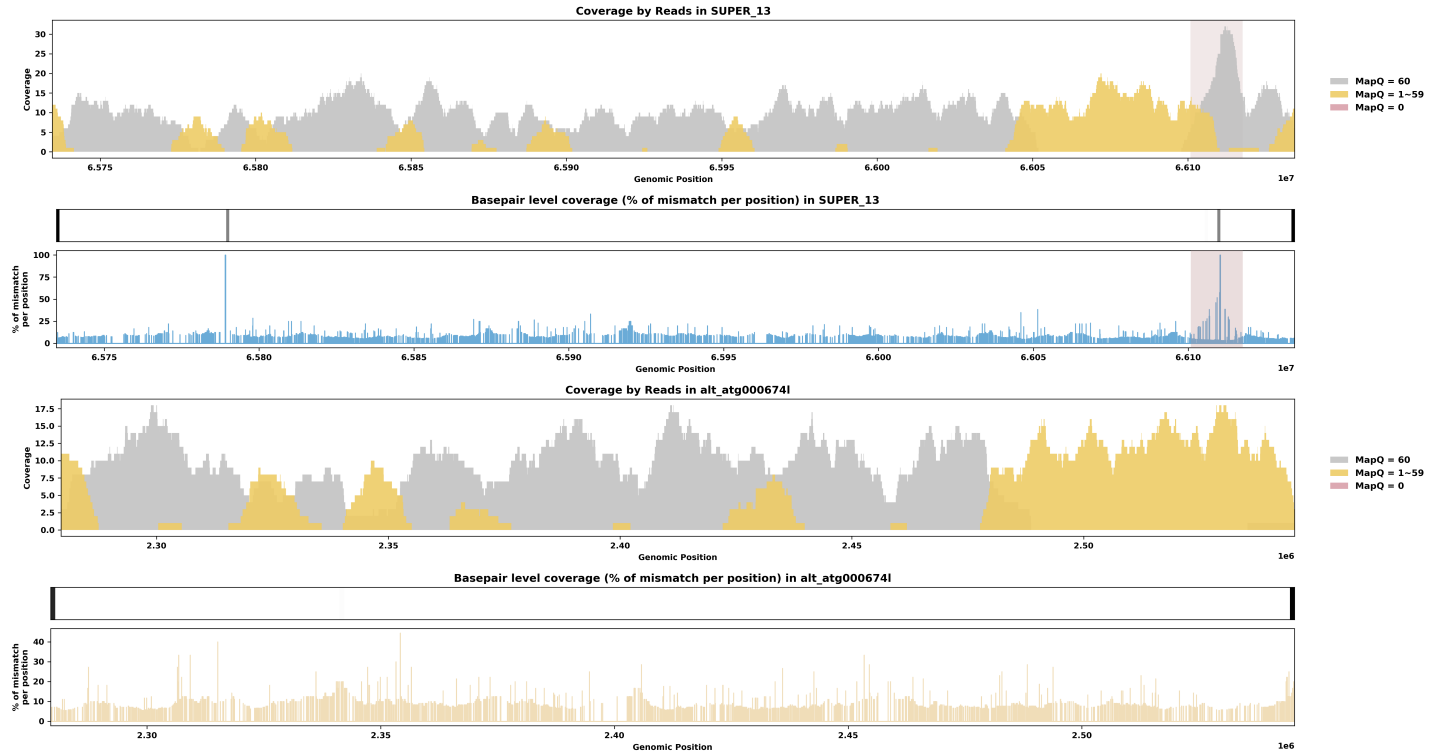

Species ID: mPipPyg2  
 Common Name: soprano pipistrelle  
 Scientific Name: Pipistrellus pygmaeus  
 Assembly Type: Not Haplotype Resolved  
 Data Source: VGP

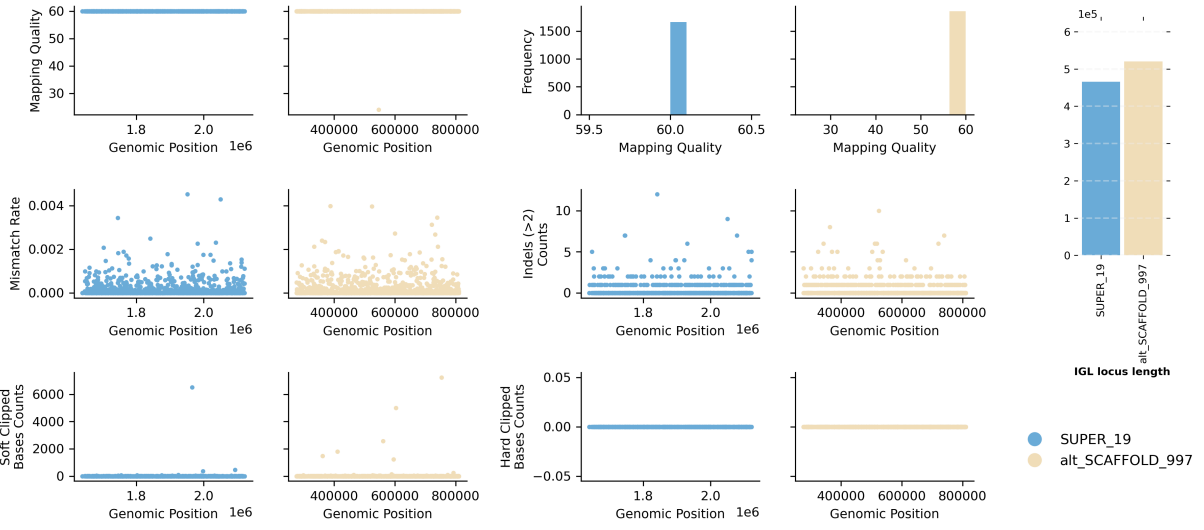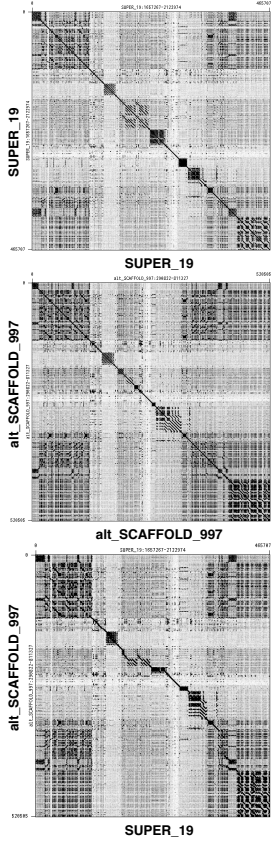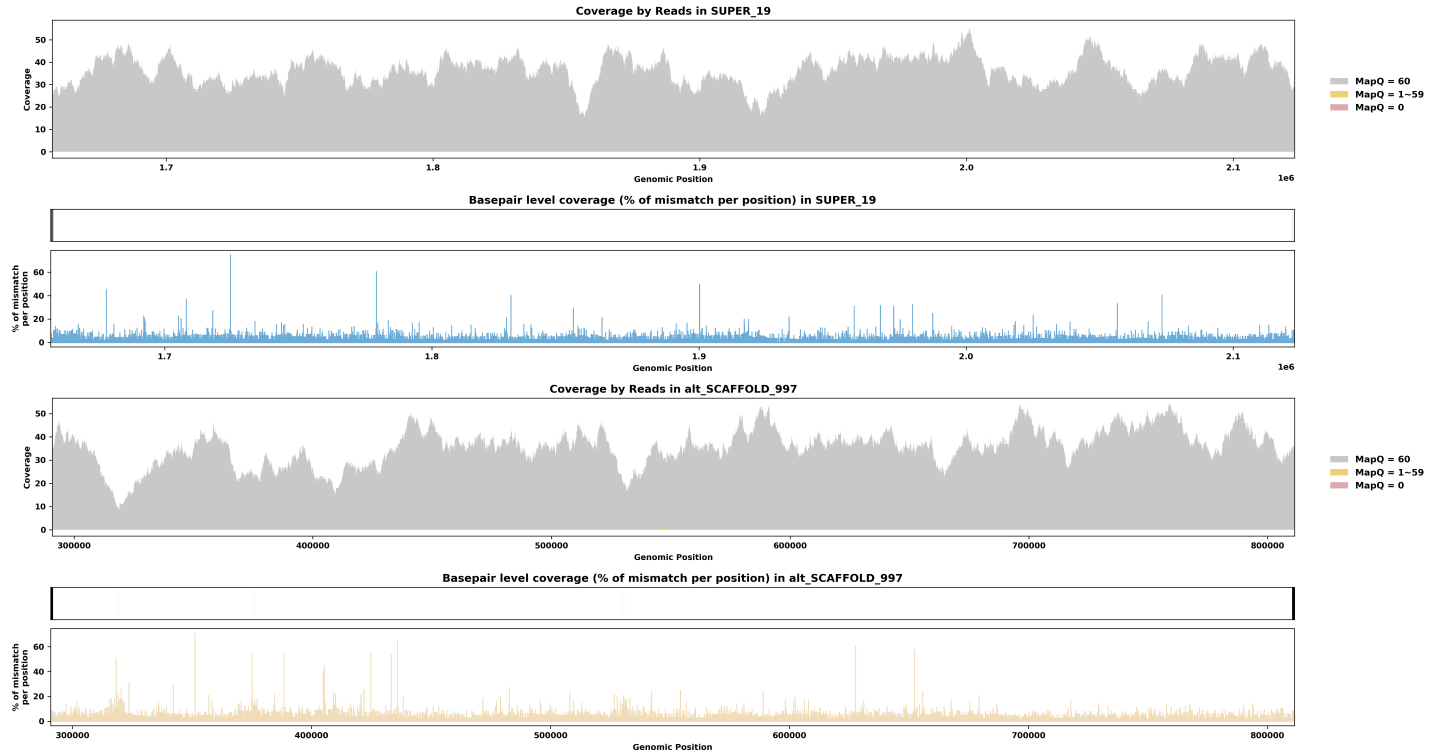



Species ID: mPonAbe1

Common Name: Sumatran orangutan

Scientific Name: Pongo\_abelii

Assembly Type: Haplotype Resolved

Data Source: T2T Primate

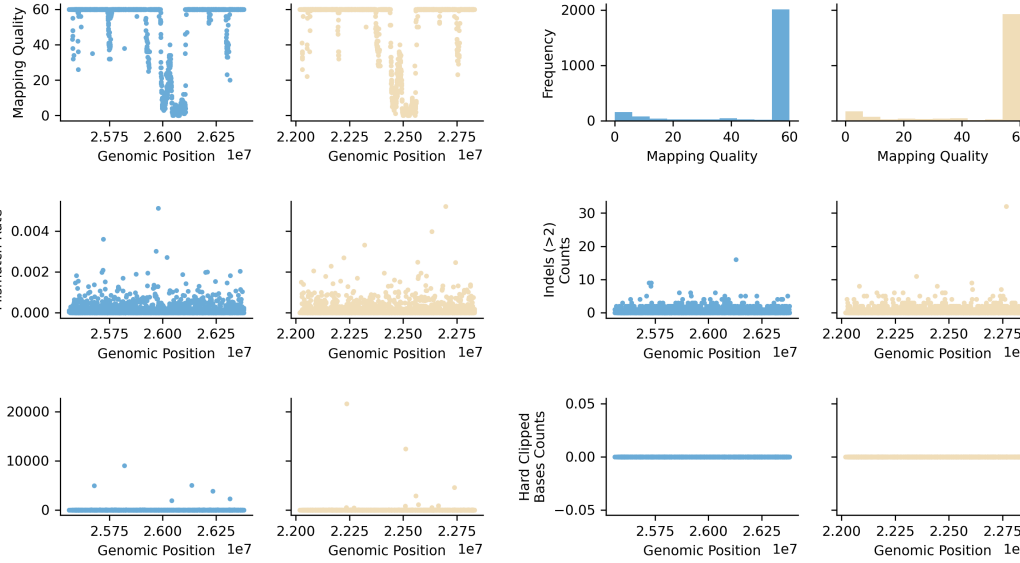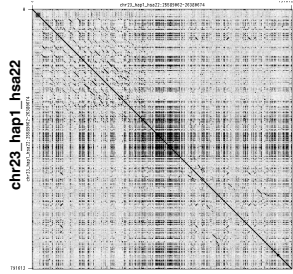

chr23\_hap1\_hsa22

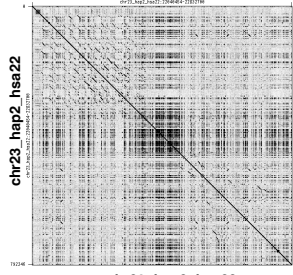

chr23\_hap2\_hsa22

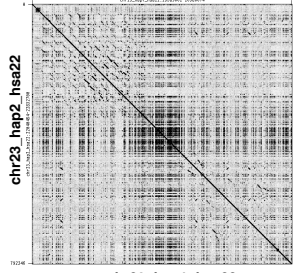

chr23\_hap1\_hsa22

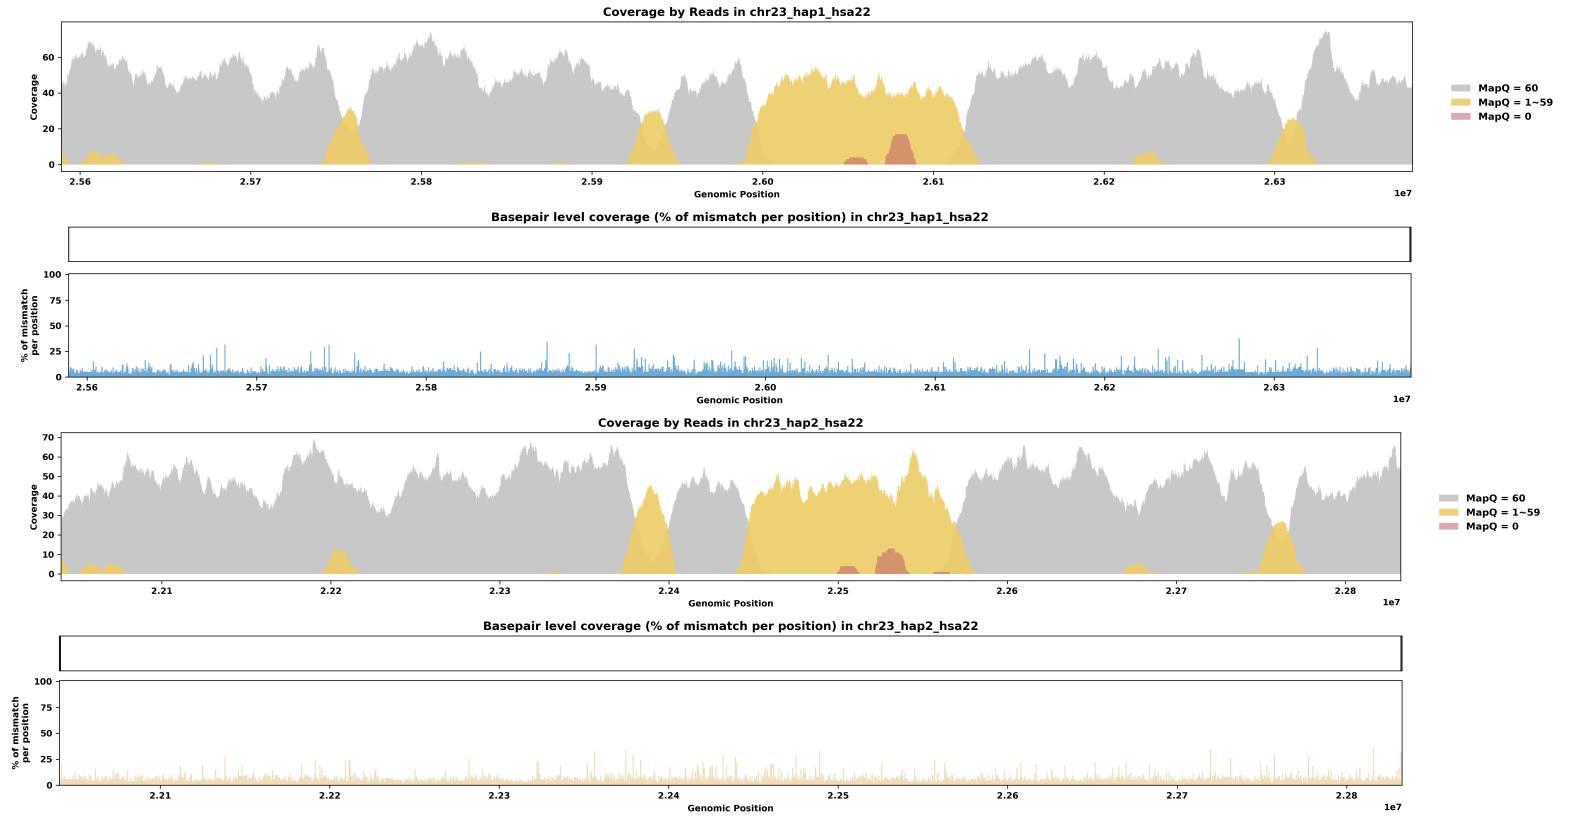

Species ID: mPonPyg2

Common Name: Borneo orangutan

Scientific Name: Pongo\_pygmaeus

Assembly Type: Haplotype Resolved

Data Source: T2T Primate

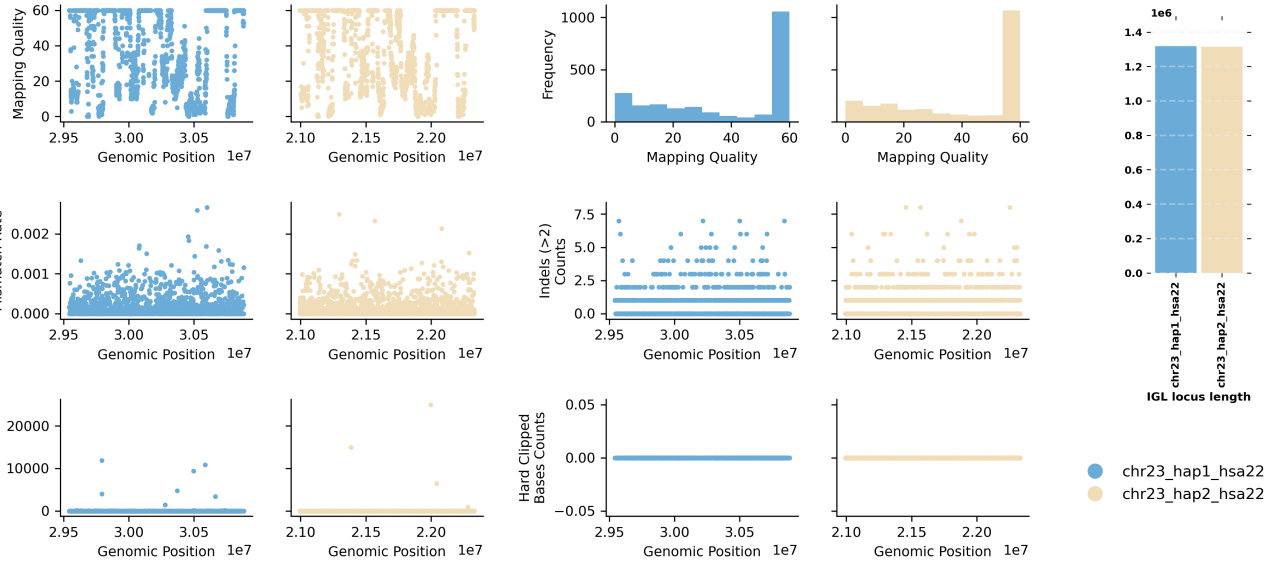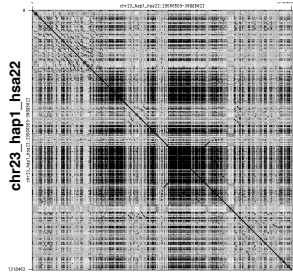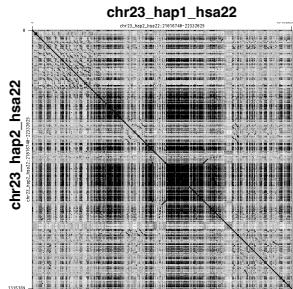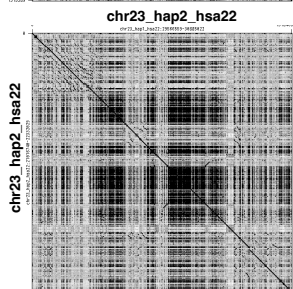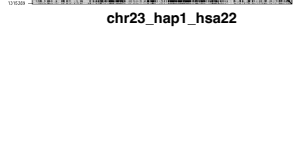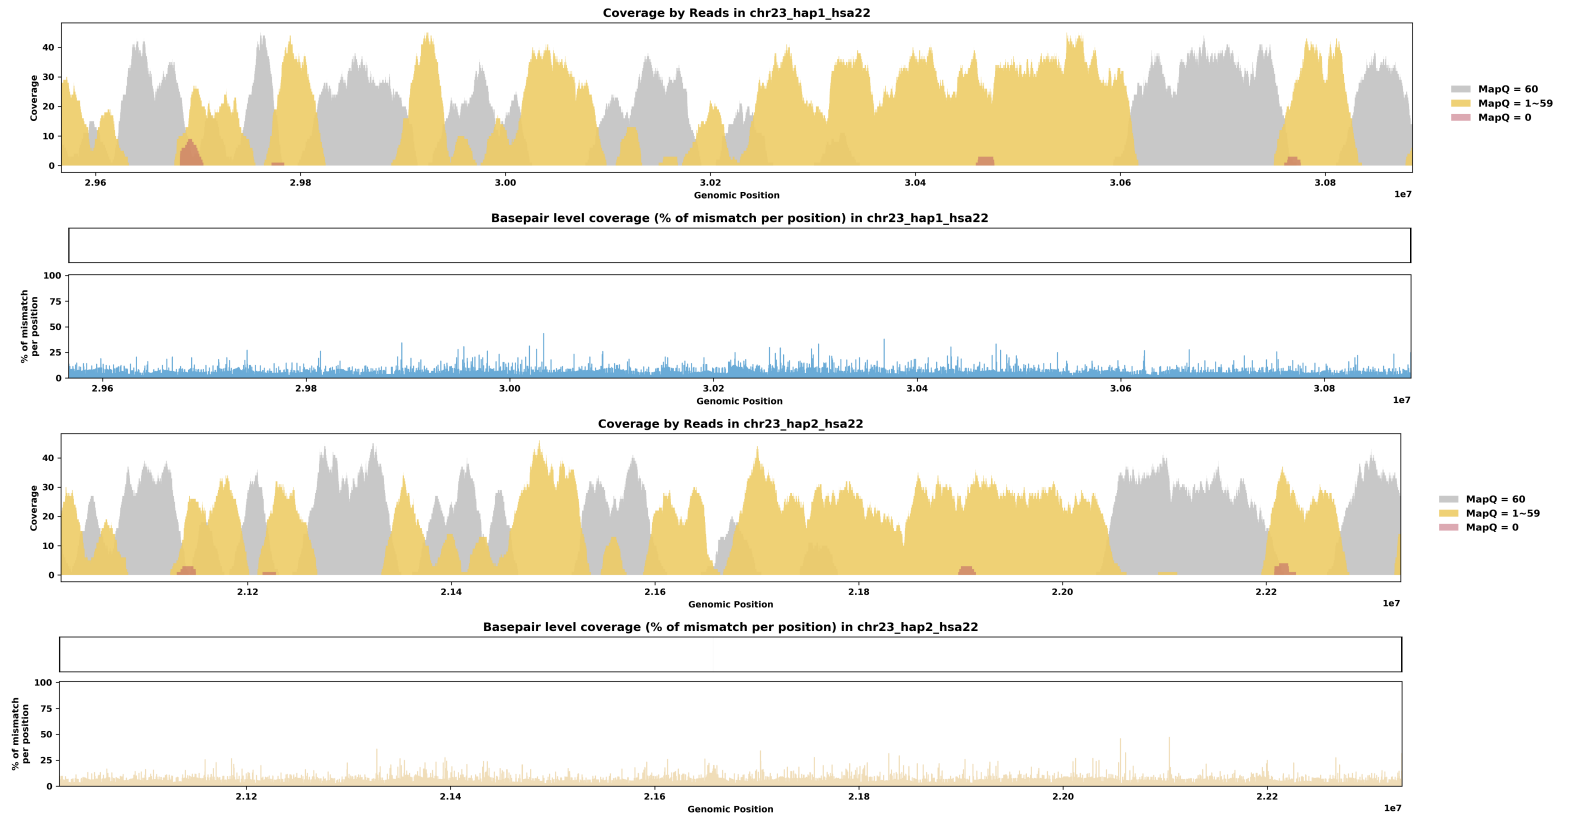

Species ID: mPseCra1  
 Common Name: false killer whale  
 Scientific Name: Pseudorca crassidens  
 Assembly Type: Haplotype Resolved  
 Data Source: VGP

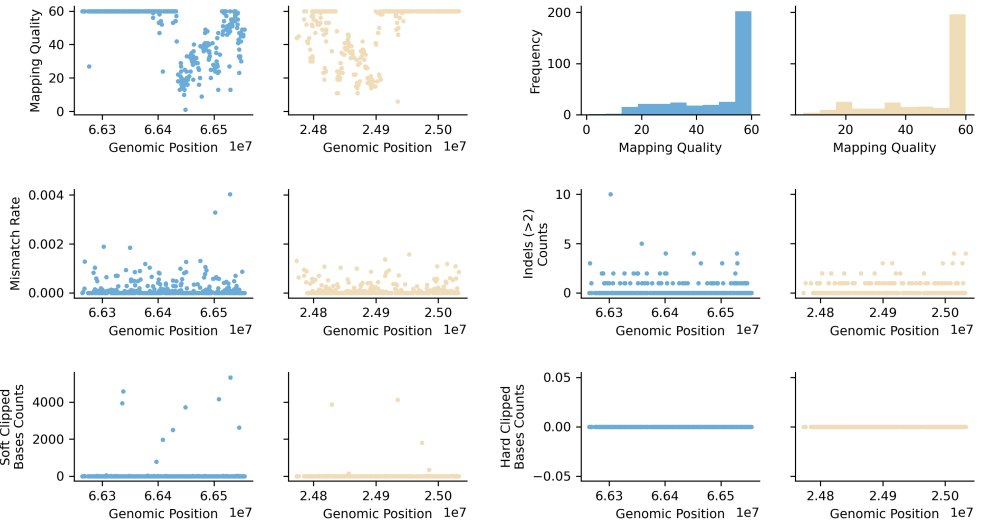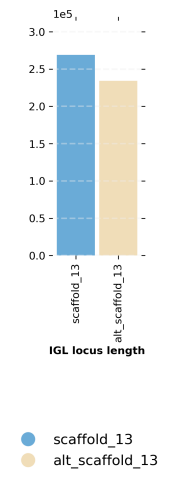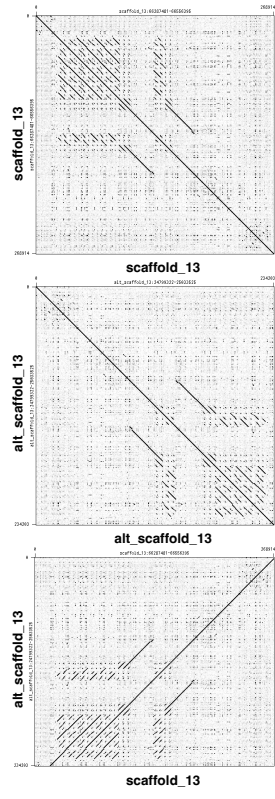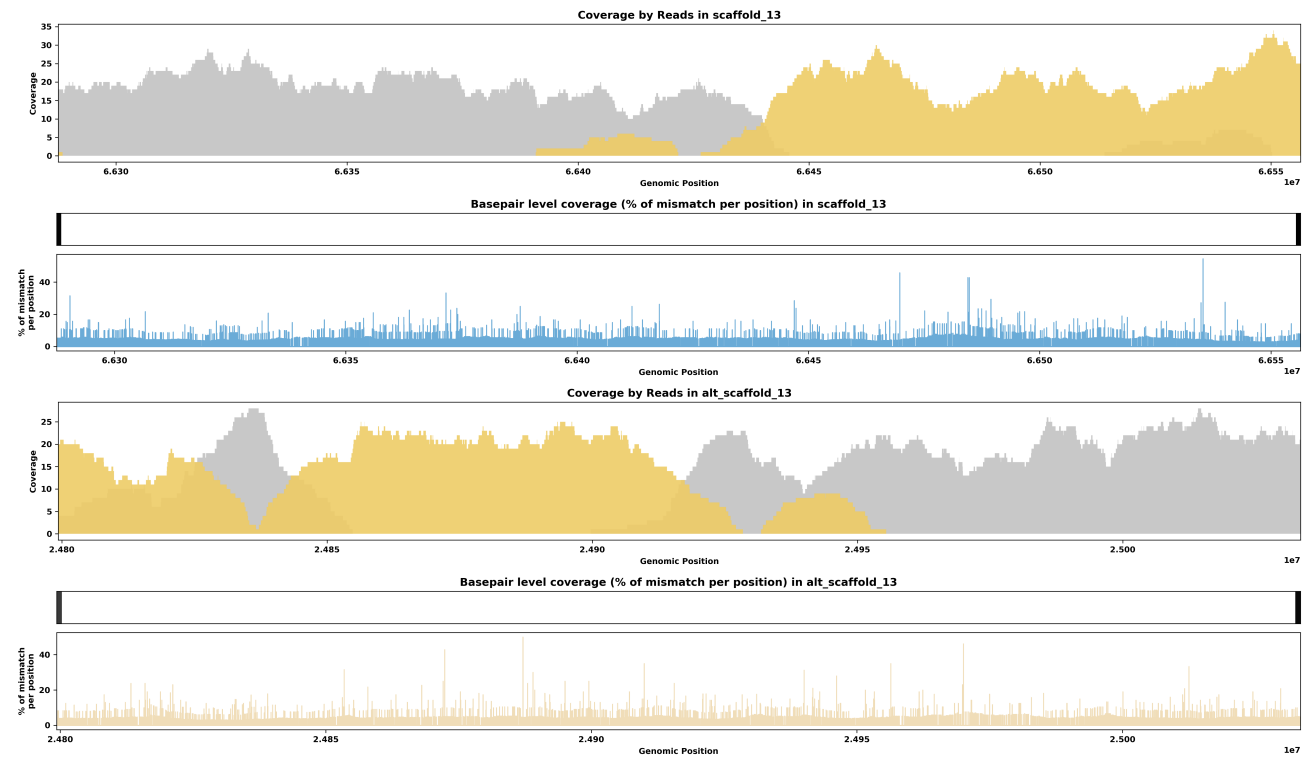

Species ID: mPumCon1  
 Common Name: Mountain Lion  
 Scientific Name: Puma concolor  
 Assembly Type: Haplotype Resolved  
 Data Source: CCGP

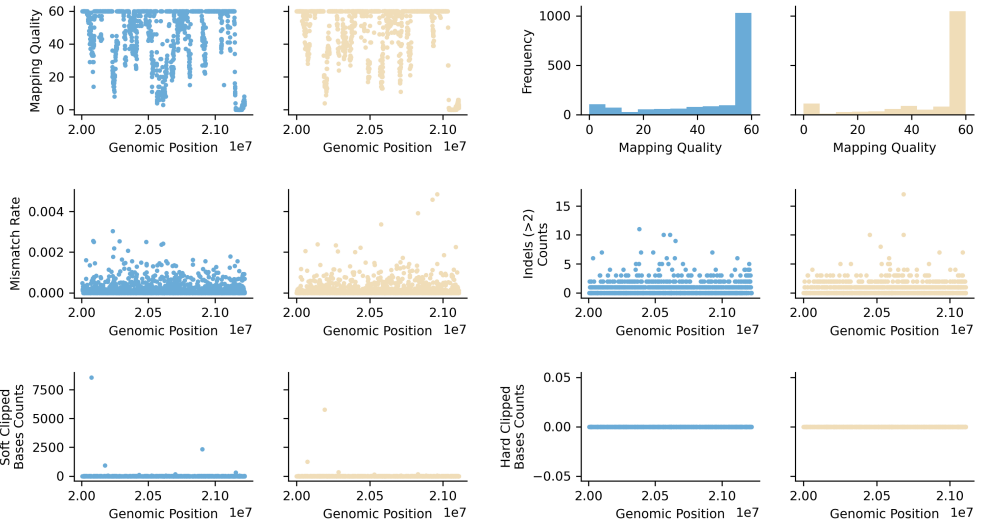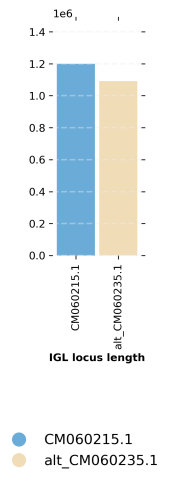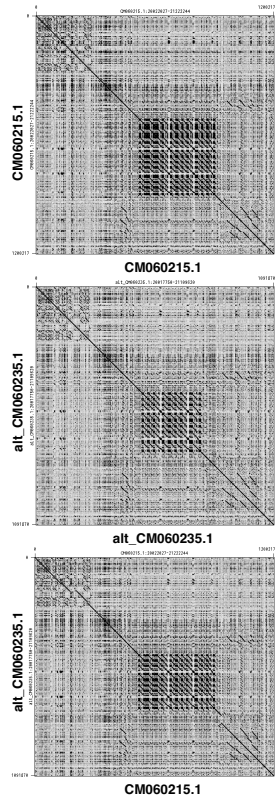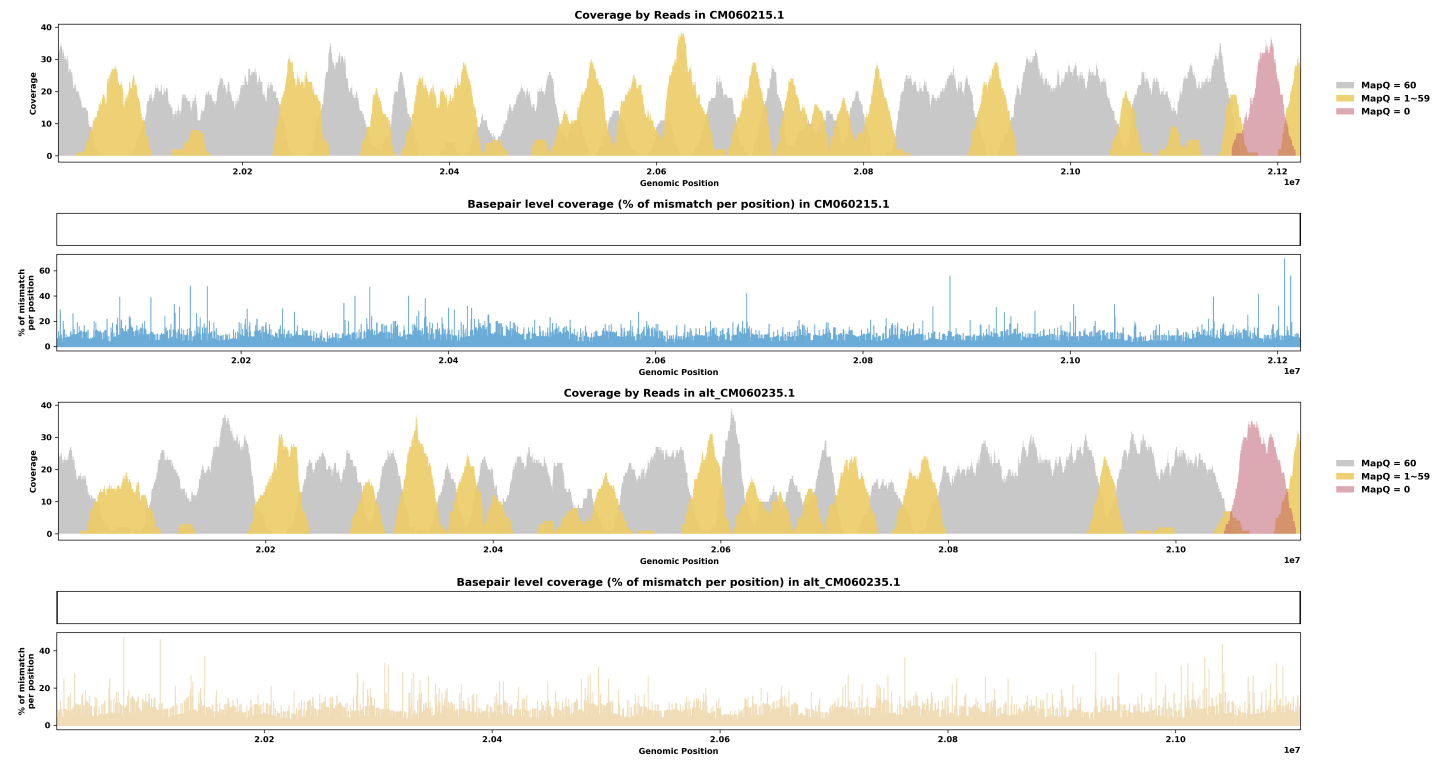

Species ID: mSorAra2  
 Common Name: Common shrew  
 Scientific Name: Sorex araneus  
 Assembly Type: Not Haplotype Resolved  
 Data Source: VGP

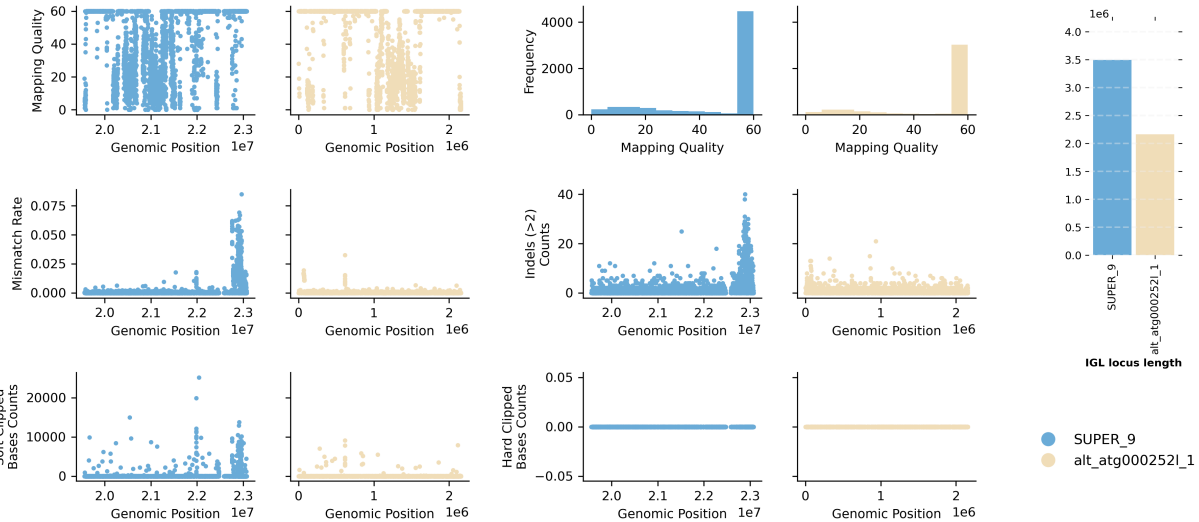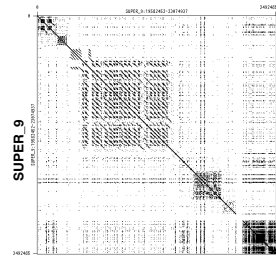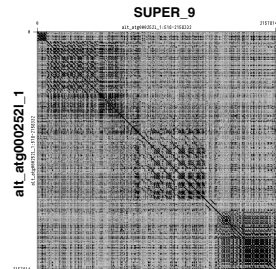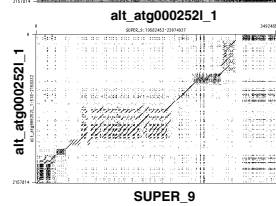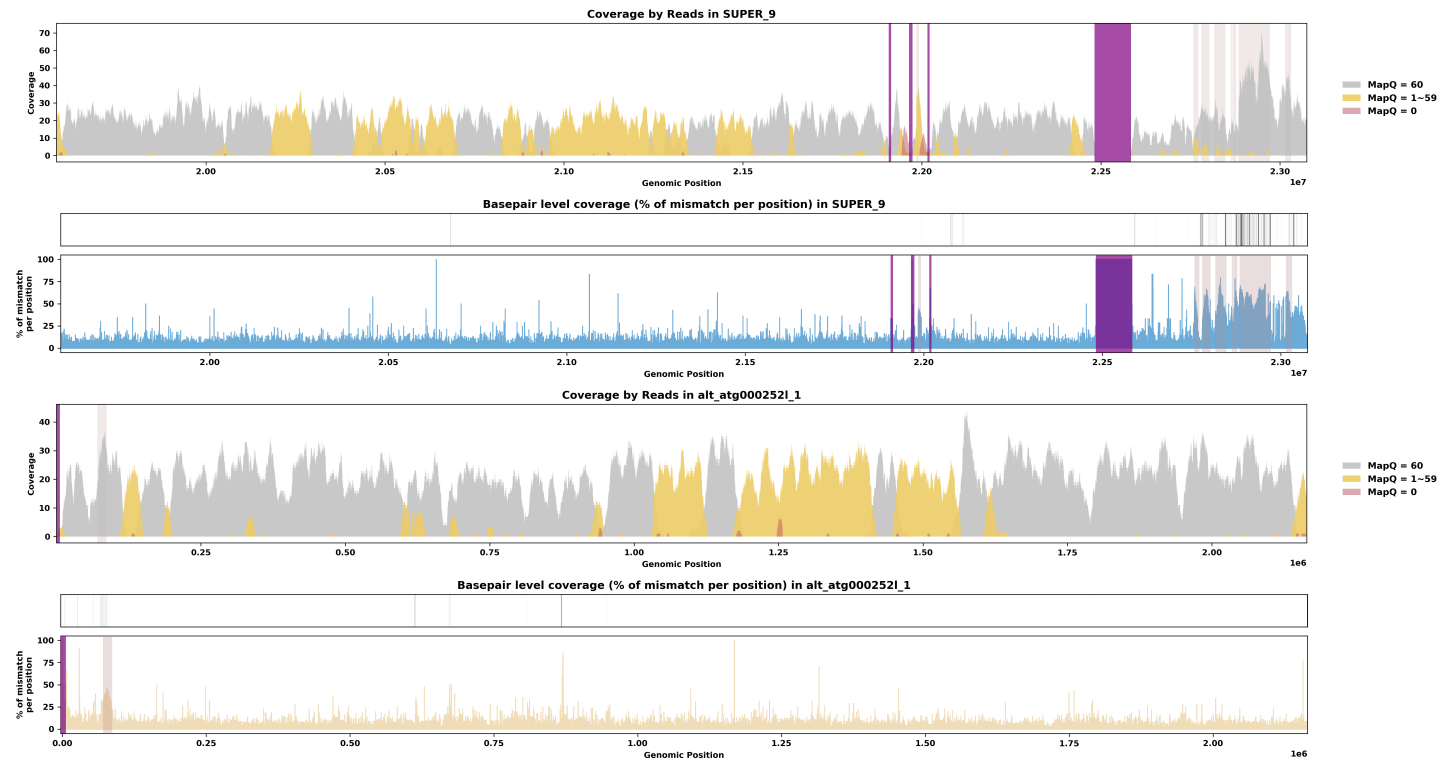

Species ID: mSteCoe1  
 Common Name: striped dolphin  
 Scientific Name: *Stenella coeruleoalba*  
 Assembly Type: Not Haplotype Resolved  
 Data Source: VGP

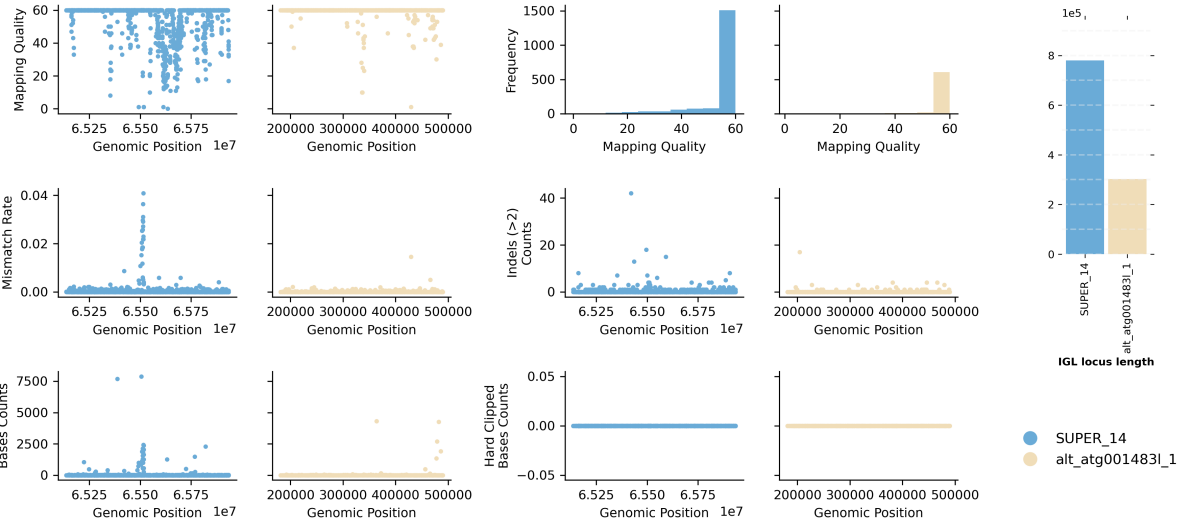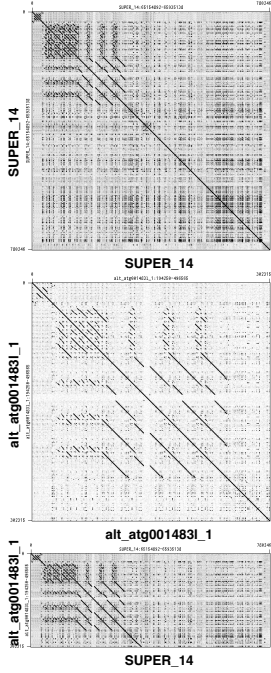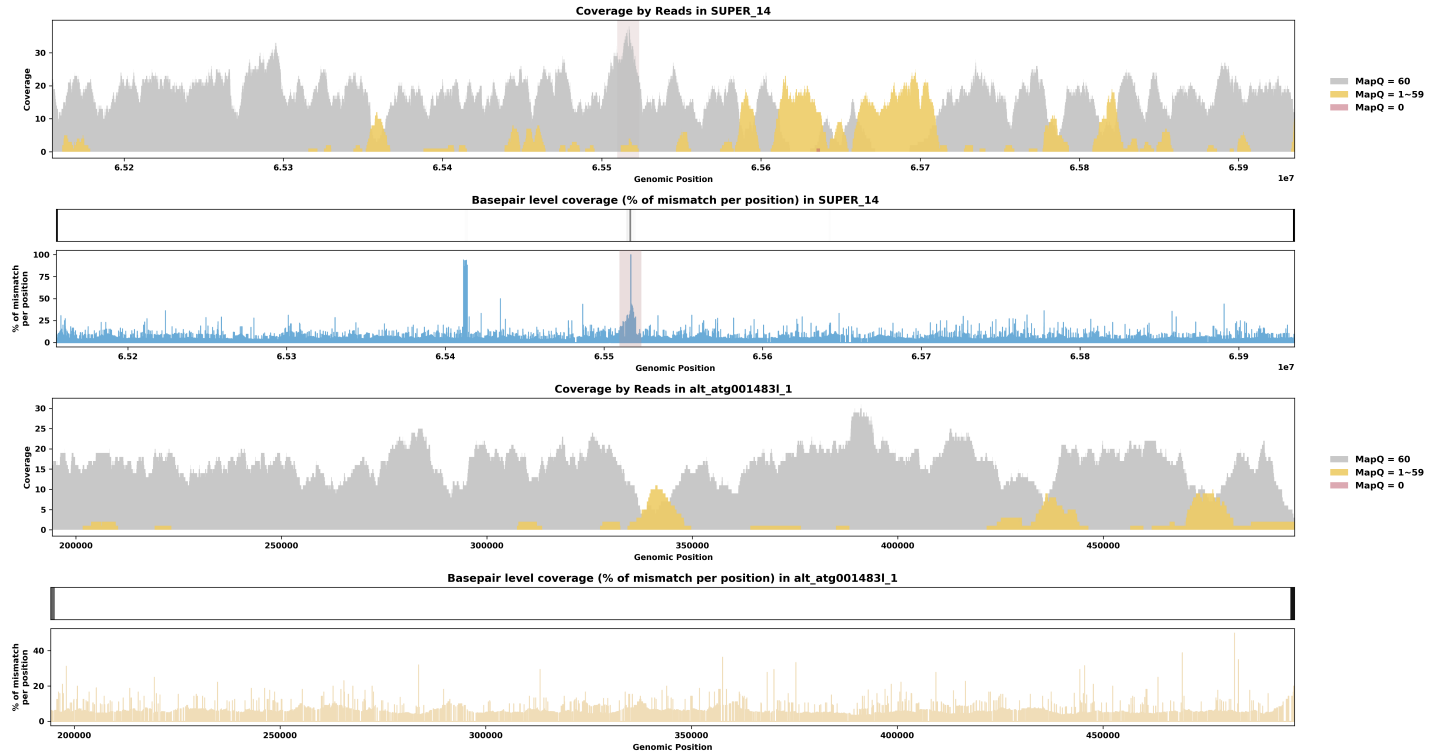

Species ID: mTalEur1

Common Name: European mole

Scientific Name: *Talpa europaea*

Assembly Type: Not Haplotype Resolved

Data Source: VGP

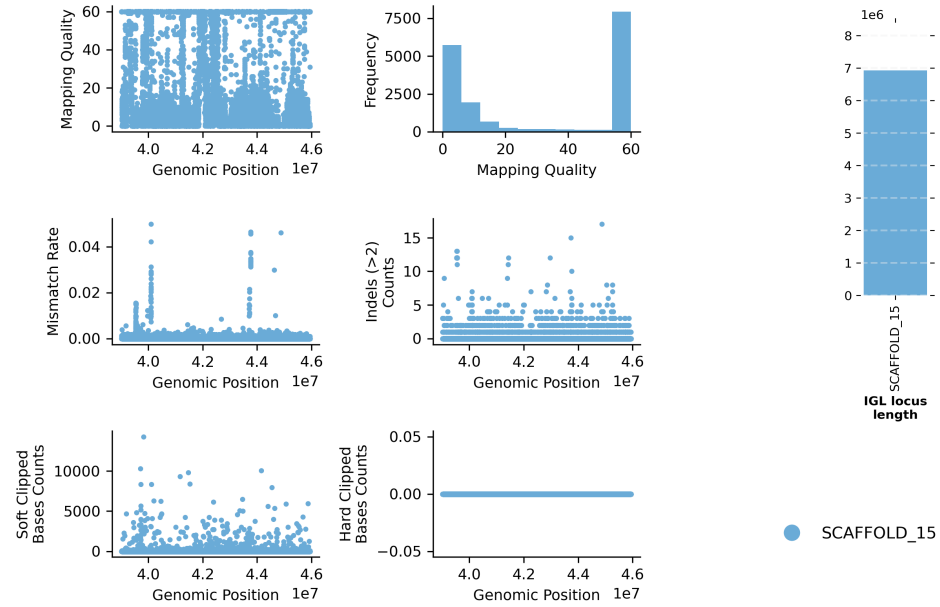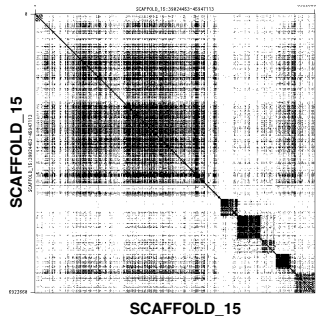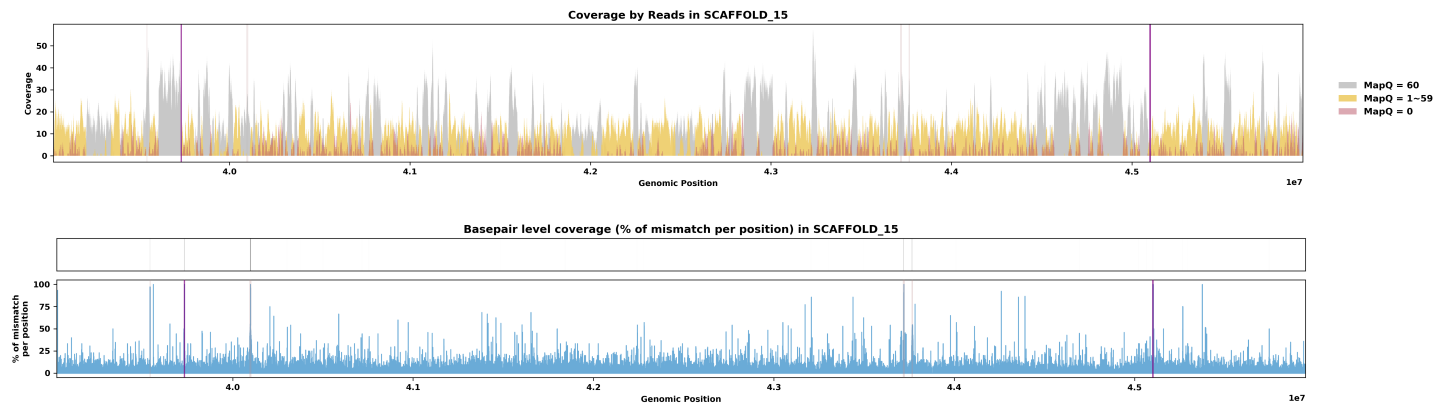

Species ID: mUrsAme1  
 Common Name: American black bear  
 Scientific Name: Ursus americanus  
 Assembly Type: Not Haplotype Resolved  
 Data Source: CCGP

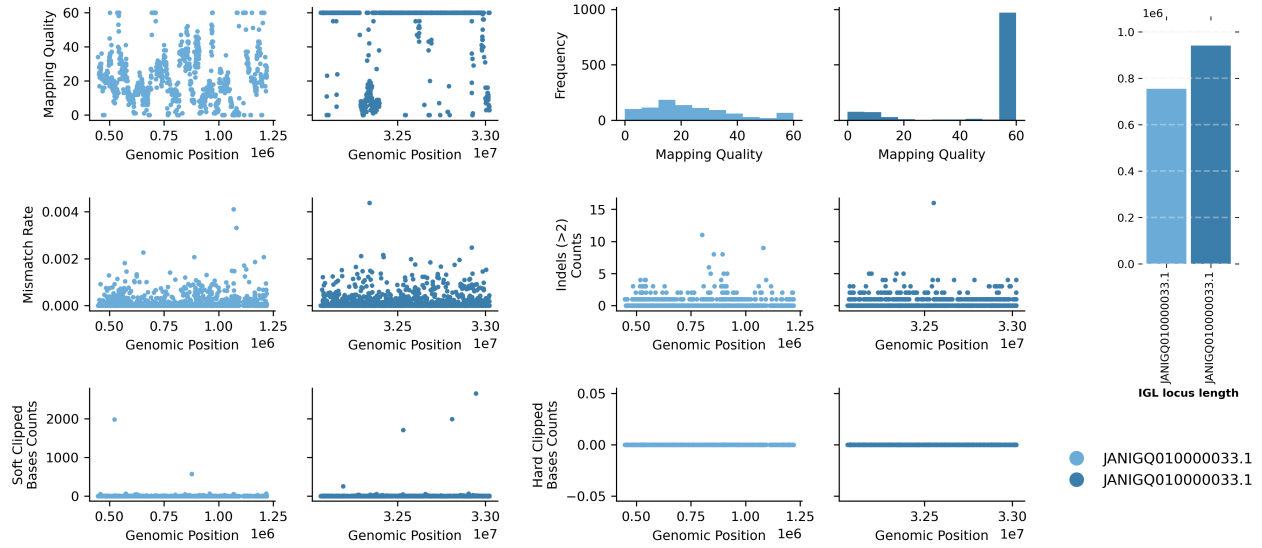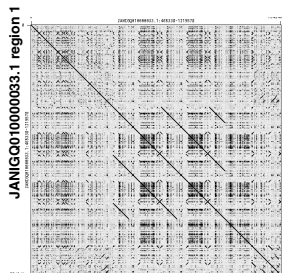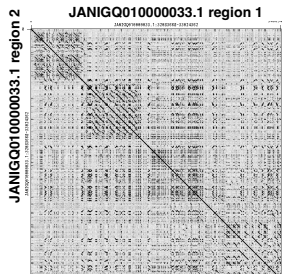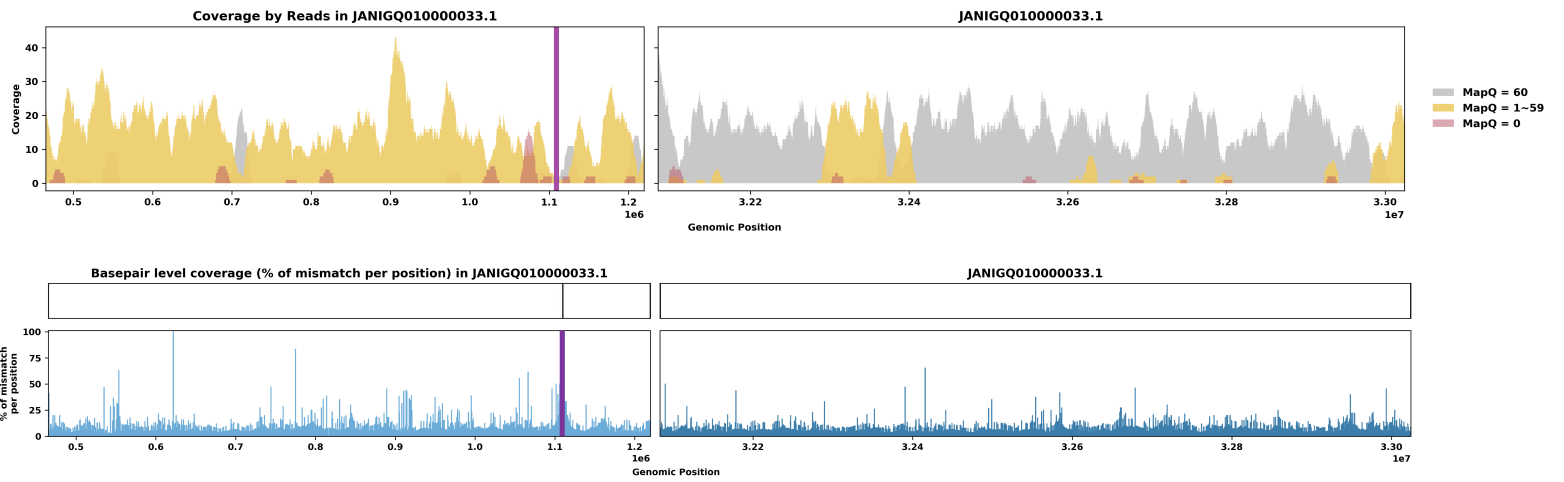



Species ID: mUrsArc2  
 Common Name: brown bear  
 Scientific Name: Ursus arctos  
 Assembly Type: Not Haplotype Resolved  
 Data Source: NCBI

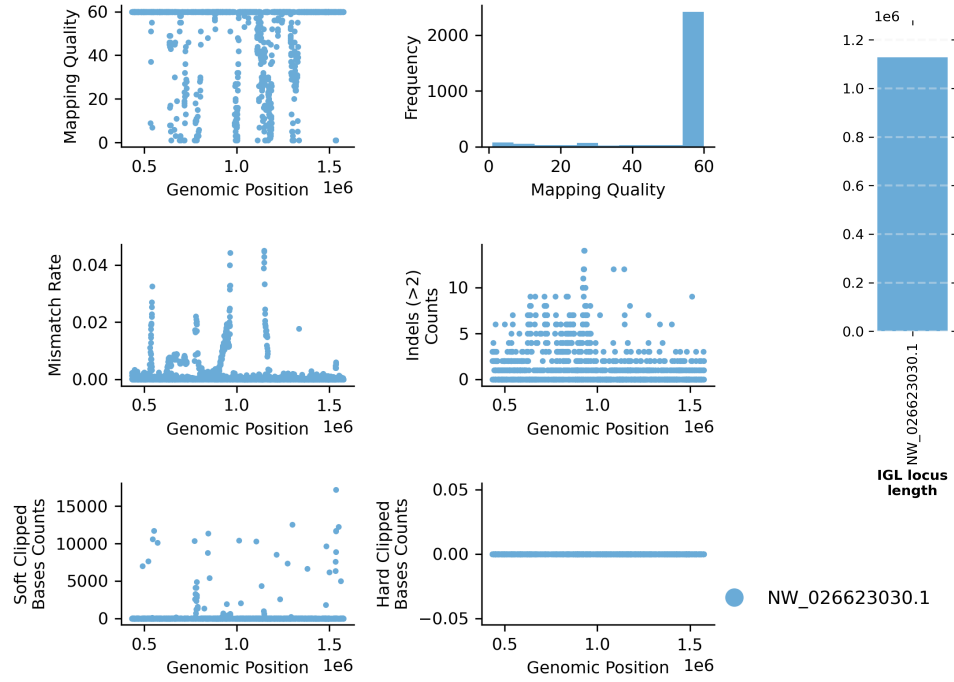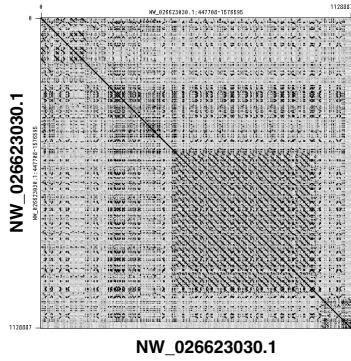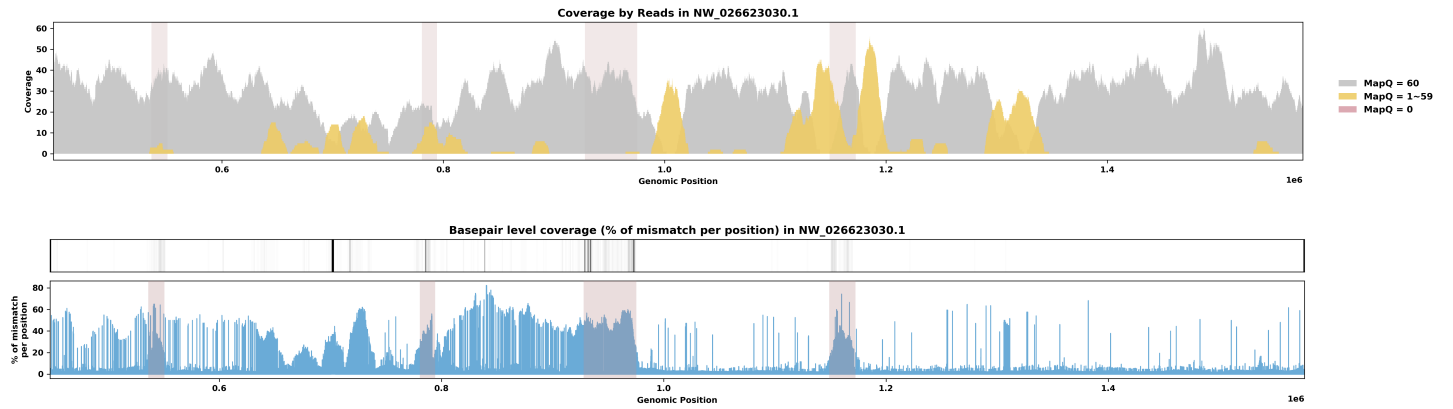

Species ID: mVesMur1  
 Common Name: particolored bat  
 Scientific Name: Vespertilio murinus  
 Assembly Type: Not Haplotype Resolved  
 Data Source: VGP

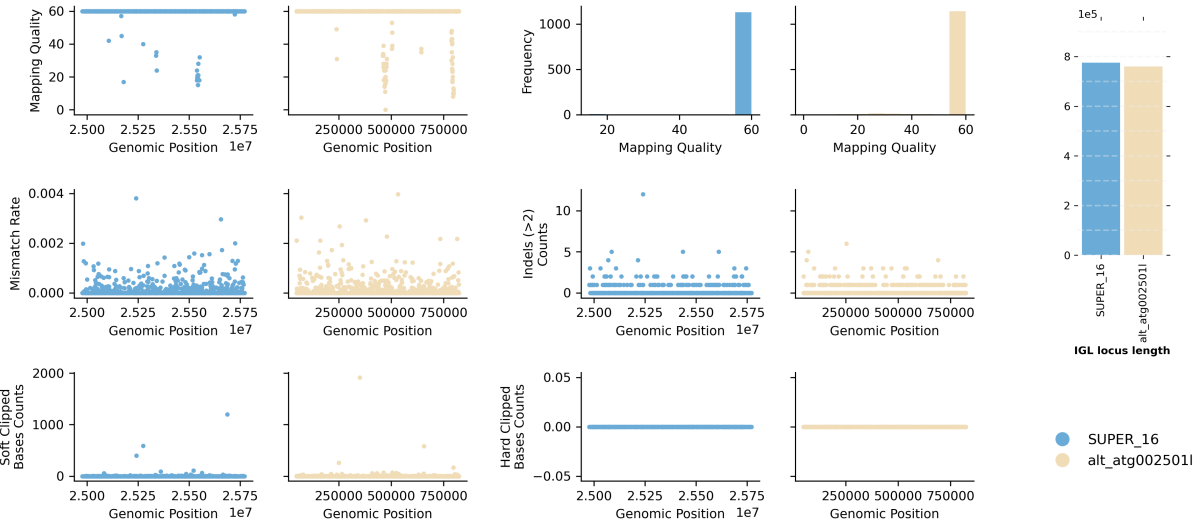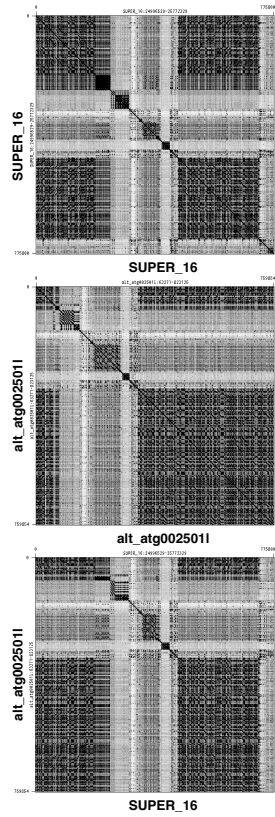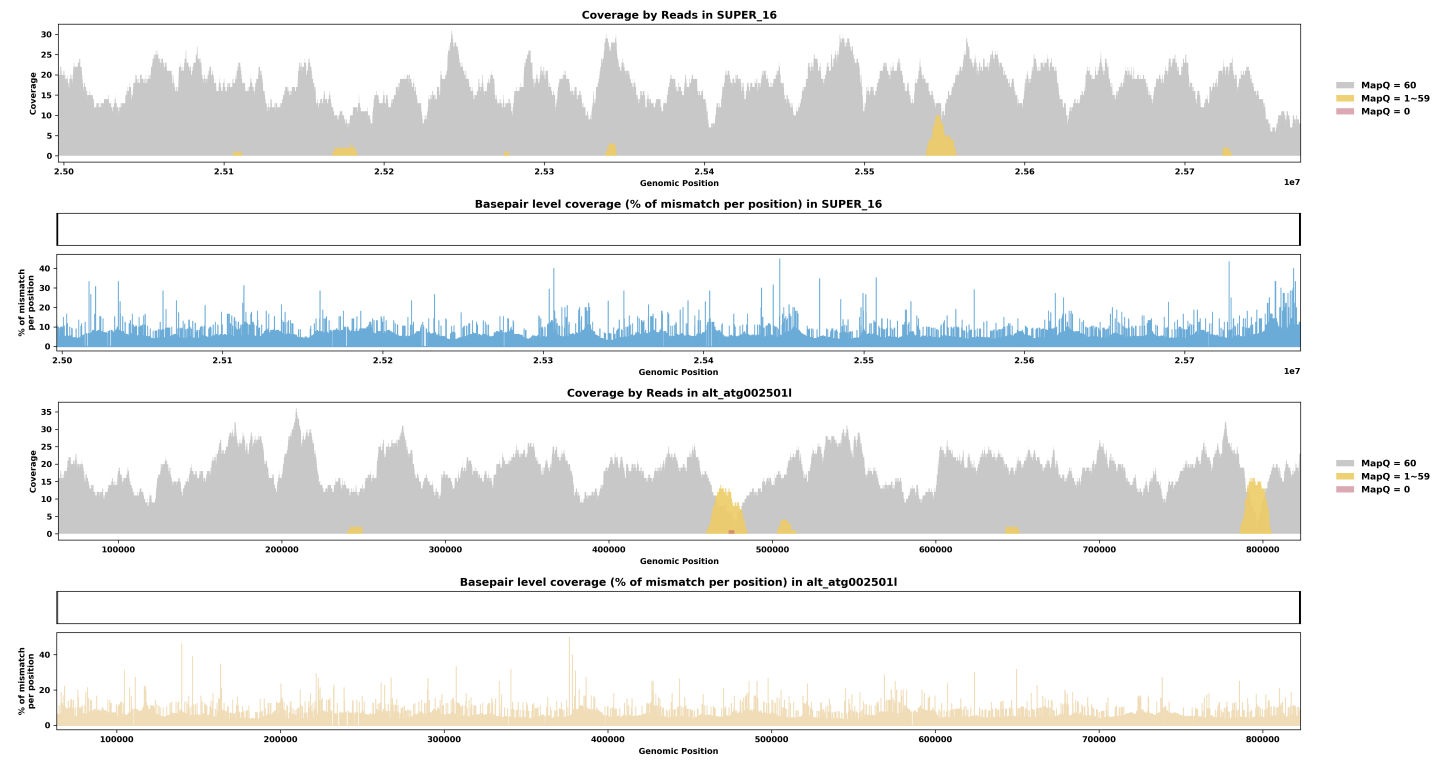

Species ID: rAllMis2

Common Name: American alligator

Scientific Name: Alligator mississippiensis

Assembly Type: Haplotype Resolved

Data Source: VGP

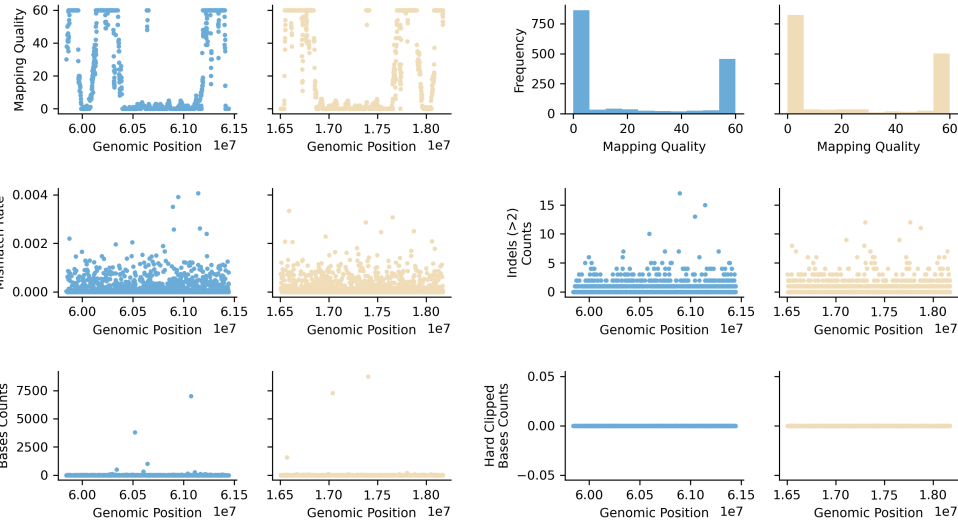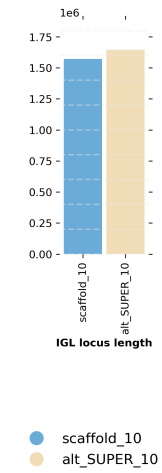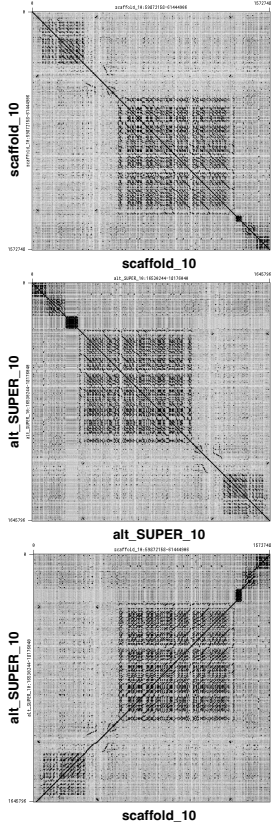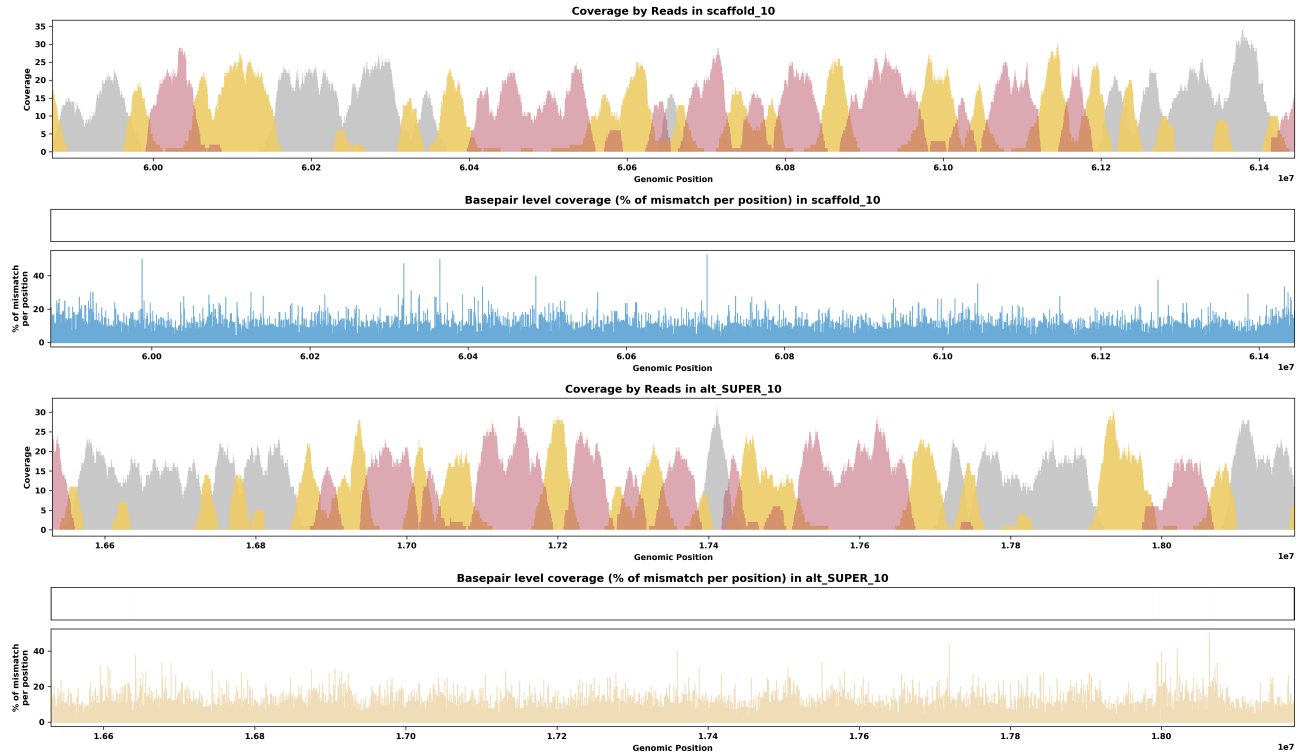

Species ID: rCarCar2

Common Name: Loggerhead turtle

Scientific Name: Caretta caretta

Assembly Type: Haplotype Resolved

Data Source: VGP

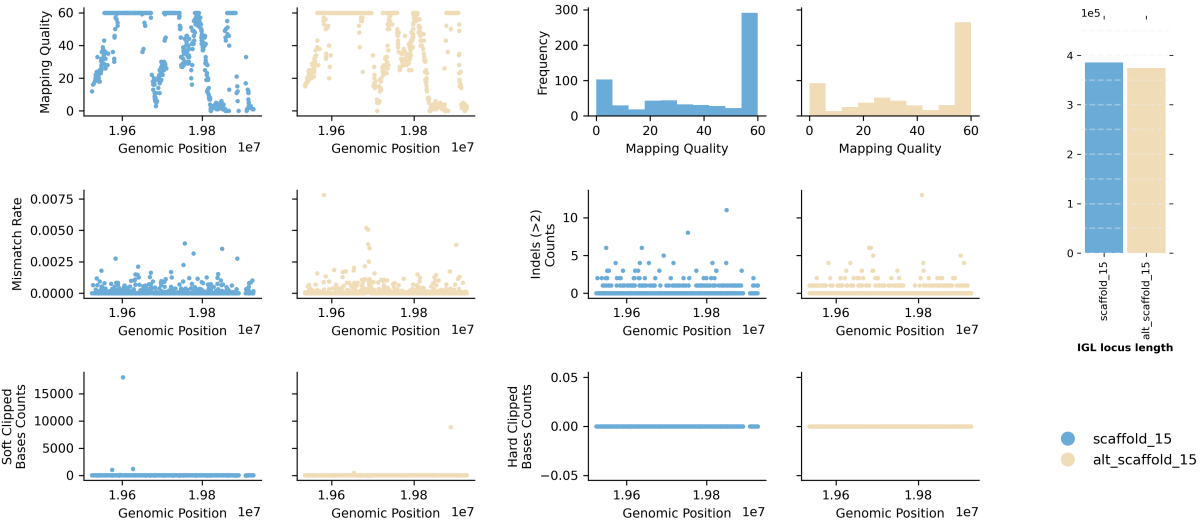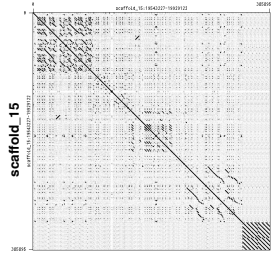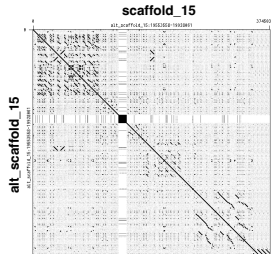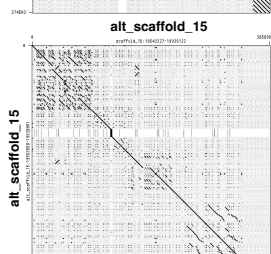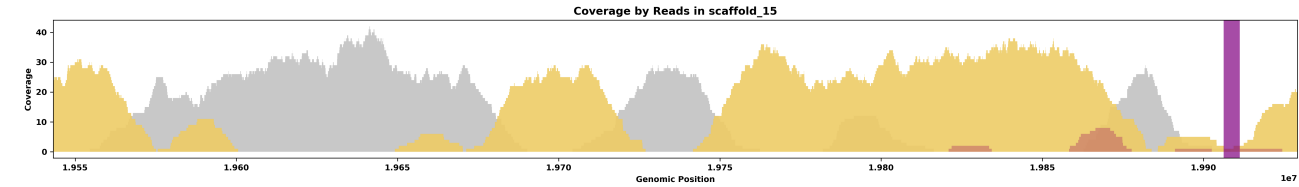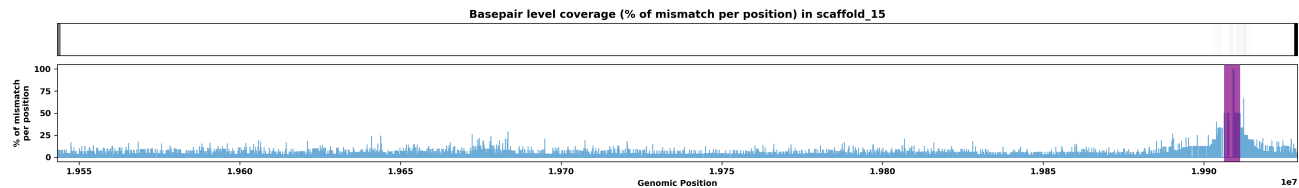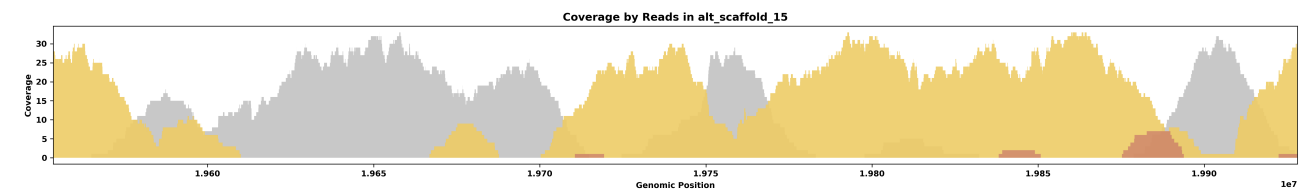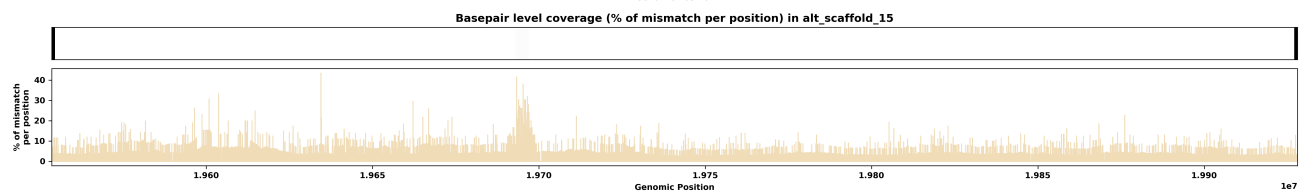

Species ID: rEmyOrb1

Common Name: European pond turtle

Scientific Name: Emys orbicularis

Assembly Type: Haplotype Resolved

Data Source: VGP

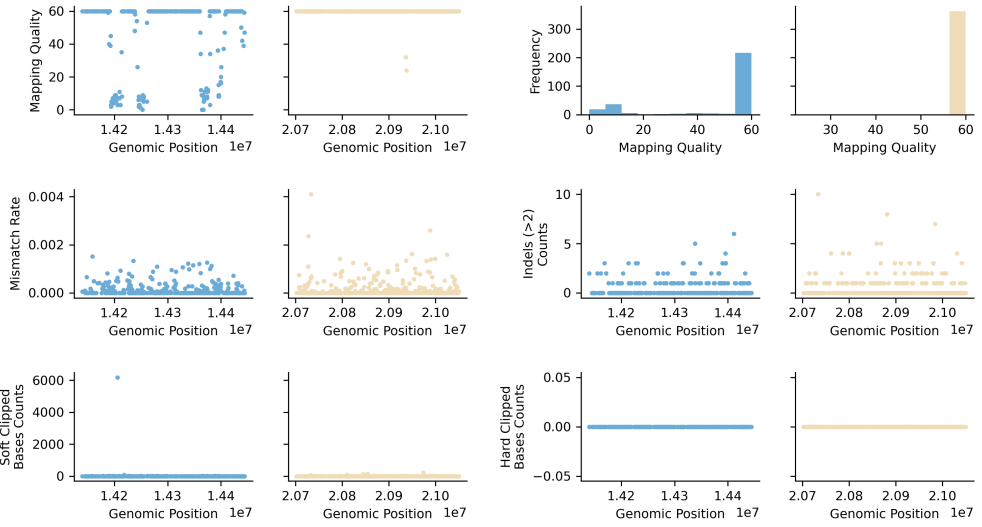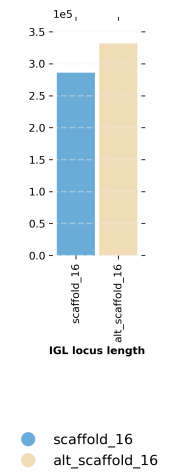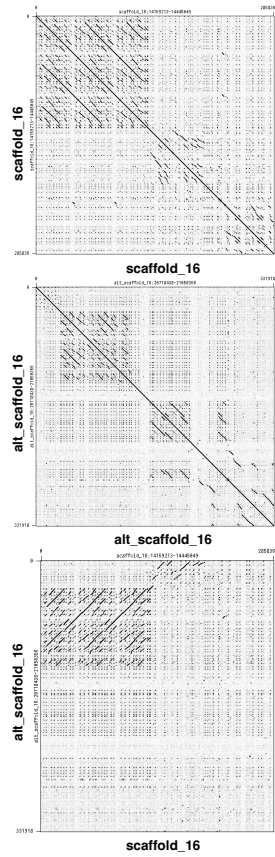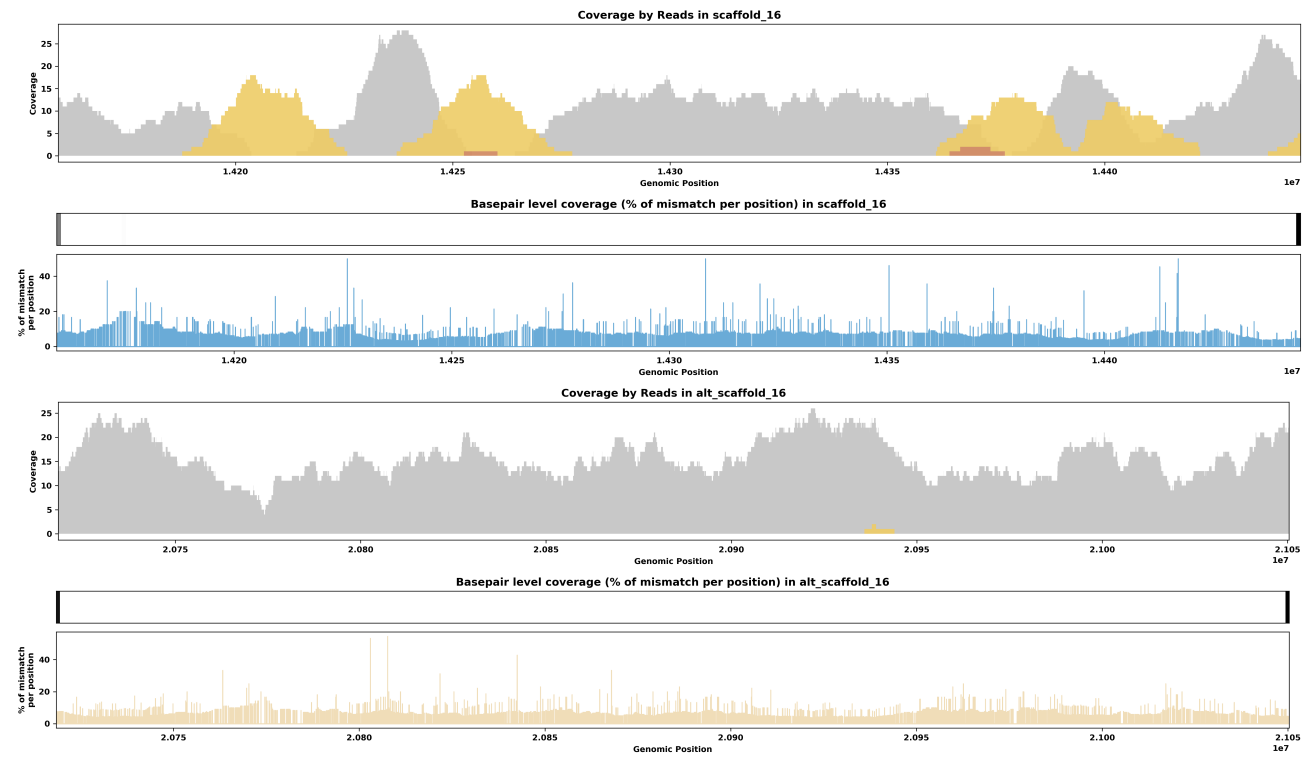

Species ID: rMalTer1  
 Common Name: diamondback terrapin  
 Scientific Name: Malaclemys terrapin  
 Assembly Type: Haplotype Resolved  
 Data Source: VGP

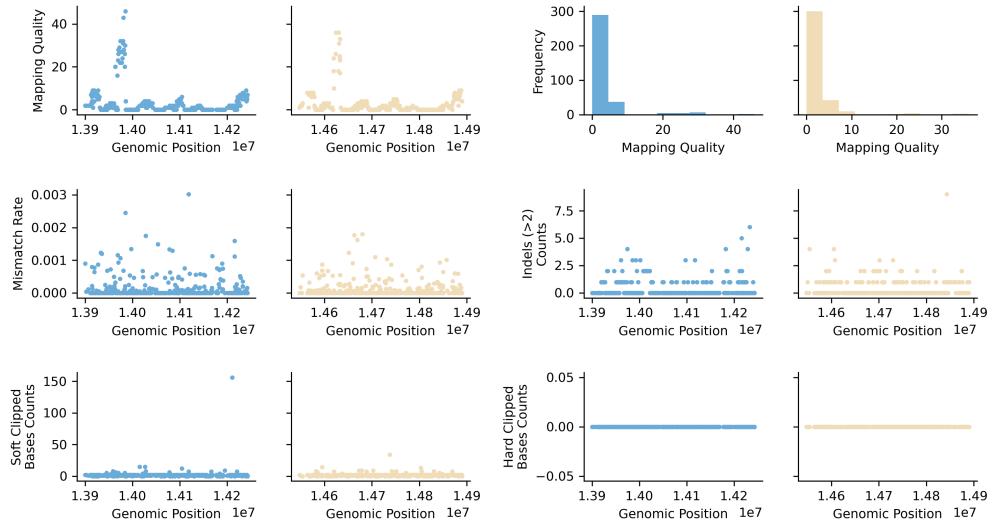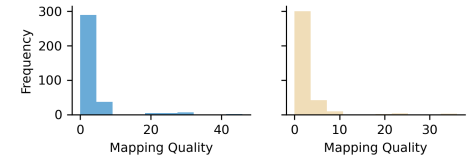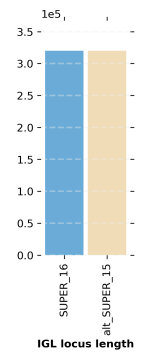

● SUPER\_16  
 ● alt\_SUPER\_15

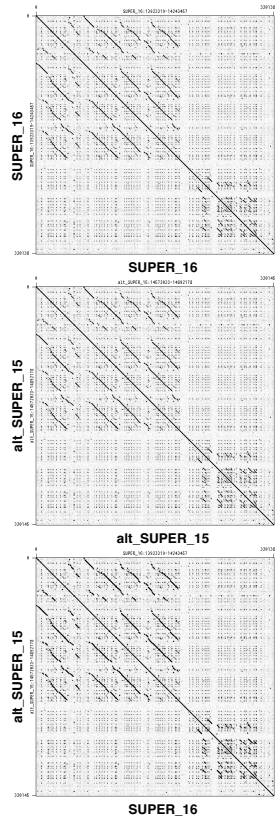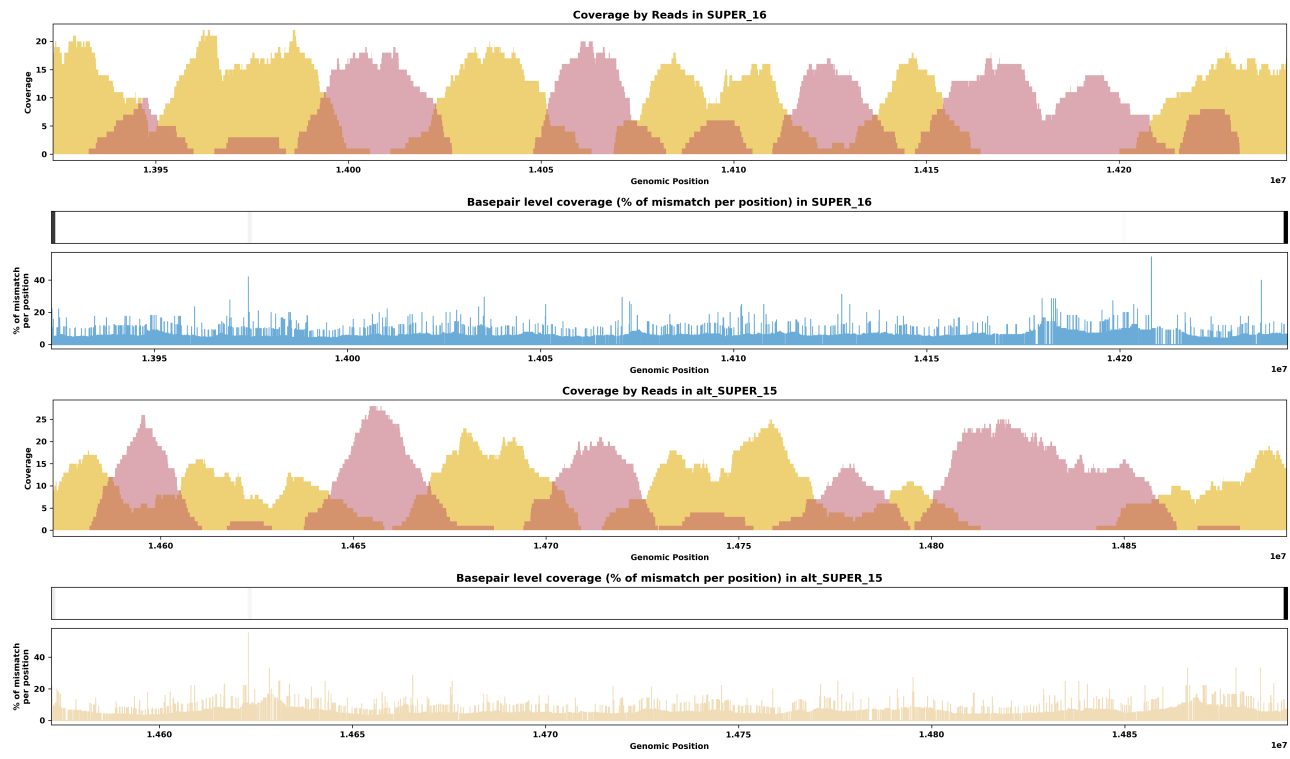

Supplement: media-4.pdf [file media-4.pdf]
