# Supplementary material
Source: PubMed Central journal article supplement (PMC11298965)
Supplement: media-1.pdf [file media-1.pdf]

IGH

| Class      | IndividualID | LatinName                     | CommonName                 | Source      | SourceLink                          | Haplotype Resolved | Evaluation Result                                                | Special Condition                                            | Curation Status                      |
|------------|--------------|-------------------------------|----------------------------|-------------|-------------------------------------|--------------------|------------------------------------------------------------------|--------------------------------------------------------------|--------------------------------------|
| Mammalia   | mApoSy1      | Apodemus sylvaticus           | wood mouse                 | VGP         | <a href="#">i/genomeark-all/#</a>   | No                 | Mismatch; Break in Primary assembly; Abnormal high coverage      | alternate locus too short/not found                          |                                      |
| Mammalia   | mBalAcu1     | Balaenoptera acutorostrata    | minke whale                | VGP         | <a href="#">rg/vgp-all/Balaen</a>   | No                 | Good                                                             | Slight mismatch                                              |                                      |
| Mammalia   | mCamDro1     | Camelus dromedarius           | dromedary                  | VGP         | <a href="#">i/genomeark-all/C</a>   | Yes                | Good                                                             | Slight Mismatch                                              |                                      |
| Mammalia   | mCanLor1     | Canis lupus                   | Greenland Wolf             | VGP         | <a href="#">s/3/genomeark/s</a>     | No                 | Mismatch                                                         | Short Alternate Assembly                                     | Missing Contig in Alternate assembly |
| Mammalia   | mCanLor2     | Canis lupus                   | Greenland Wolf             | VGP         | <a href="#">s/3/genomeark/s</a>     | Yes                | Break in Primary assembly                                        |                                                              | false inversion                      |
| Mammalia   | mCerEla1     | Cervus elaphus                | Red Deer                   | VGP         | <a href="#">s/3/genomeark/spx</a>   | No                 | Good                                                             | Slight Mismatch; Short Alternate Assembly                    |                                      |
| Mammalia   | mChiNiv1     | Chionomys nivalis             | European snow vole         | VGP         | <a href="#">i/genomeark-all</a>     | No                 | Good                                                             | Slight Mismatch; alternate locus too short/not found         |                                      |
| Mammalia   | mCorTow1.0   | Corynorhinus townsendii       | Townsend's Big-eared Bat   | CCGP        | <a href="#">i/corynorhinus-tow</a>  | Yes                | Break in Primary + Alternate assembly                            | 2 IGH; Slight Mismatch                                       |                                      |
| Mammalia   | mCynVol1     | Cynocephalus volans           | Philippine flying lemur    | VGP         | <a href="#">genomeark/specif</a>    | No                 | Mismatch                                                         | Short Alternate Assembly                                     | Missing Contig in Alternate assembly |
| Mammalia   | mDasNov1     | Dasyops novemcinctus          | nine-banded armadillo      | VGP         | <a href="#">i/genomeark-all/D</a>   | Yes                | Break in Primary + Alternate Assembly                            |                                                              |                                      |
| Mammalia   | mDelDel1     | Delphinus delphis             | saddleback dolphin         | VGP         | <a href="#">rk.org/vgp-all/Del</a>  | No                 | Mismatch                                                         | Short Alternate Assembly                                     |                                      |
| Mammalia   | mDicBic1     | Diceros bicornis              | black rhinoceros           | VGP         | <a href="#">b.io/genomeark-a</a>    | Yes                | Mismatch; Break in Primary assembly                              |                                                              |                                      |
| Mammalia   | mDipMer1     | Dipodomys merriami            | Merriam's Kangaroo Rat     | CCGP        | <a href="#">ies/dipodomys-m</a>     | No                 | Good                                                             |                                                              |                                      |
| Mammalia   | mEleMax1     | Elephas maximus               | Asiatic Elephant           | VGP         | <a href="#">i/genomeark/spec</a>    | No                 | Good                                                             | Short Alternate Assembly                                     |                                      |
| Mammalia   | mEptNil1     | Eptesicus nilssonii           | northern bat               | VGP         | <a href="#">rk.org/vgp-all/Ept</a>  | No                 | Mismatch; Break in Alternate Assembly                            | 2 IGH                                                        |                                      |
| Mammalia   | mEriEur2     | Erinaceus europaeus           | western European hedgehog  | VGP         | <a href="#">k.org/vgp-all/Erin</a>  | No                 | Mismatch; Break in Primary assembly                              | alternate locus too short/not found                          |                                      |
| Mammalia   | mEscRob2     | Eschrichtius robustus         | grey whale                 | VGP         | <a href="#">k.org/vgp-all/Esch</a>  | No                 | Good                                                             |                                                              |                                      |
| Mammalia   | mEubGla1     | Eubalaena glacialis           | North Atlantic right whale | VGP         | <a href="#">rk.org/vgp-all/Eub</a>  | Yes                | Good                                                             |                                                              |                                      |
| Mammalia   | mGloMel1     | Globicephala melas            | long-finned pilot whale    | VGP         | <a href="#">rk.org/vgp-all/Glo</a>  | No                 | Good                                                             | Short Alternate Assembly                                     |                                      |
| Mammalia   | mGorGor1     | Gorilla gorilla               | Gorilla                    | T2T Primate | <a href="#">s/3/genomeark/sr</a>    | Yes                | Good                                                             |                                                              |                                      |
| Mammalia   | mHetBru1     | Heterohyrax brucei            | Yellow-spotted hyrax       | VGP         | <a href="#">io/genomeark-all</a>    | No                 | Good                                                             | Short Alternate Assembly                                     |                                      |
| Mammalia   | mHipAmp2     | Hippopotamus amphibius kiboko | hippopotamus               | VGP         | <a href="#">ark-curated-asser</a>   | Yes                | Good                                                             | Slight Mismatch; Most MapQ 0 reads; Short Alternate Assembly |                                      |
| Mammalia   | mHypAmp2     | Hyperoodon ampullatus         | northern bottlenose whale  | VGP         | <a href="#">org/vgp-all/Hyper</a>   | No                 | Good                                                             | Short Alternate Assembly                                     |                                      |
| Mammalia   | mLagAlb1     | Lagenorhynchus albirostris    | white-beaked dolphin       | VGP         | <a href="#">rg/vgp-all/Lagena</a>   | No                 | Mismatch                                                         | alternate locus too short/not found                          |                                      |
| Mammalia   | mLemCat1     | Lemur catta                   | Ring-tailed lemur          | VGP         | <a href="#">ub.io/genomeark</a>     | No                 | Break in Primary assembly (but also is the beginning of chrom)   |                                                              |                                      |
| Mammalia   | mLynRuf1     | Lynx rufus                    | Bobcat                     | CCGP        | <a href="#">iect.org/species/</a>   | No                 | Good                                                             | alternate locus too short/not found                          |                                      |
| Mammalia   | mMacEug1     | Macropus eugenii              | tammar wallaby             | VGP         | <a href="#">io/genomeark-all</a>    | No                 | Mismatch; Break in Primary assembly                              | alternate locus too short/not found                          |                                      |
| Mammalia   | mManPen7     | Manis pentadactyla            | Chinese pangolin           | VGP         | <a href="#">io/genomeark-all/</a>   | Yes                | Good                                                             | Slight Mismatch                                              |                                      |
| Mammalia   | mMarMar1     | Martes martes                 | European pine marten       | VGP         | <a href="#">eark.org/vgp-all/M</a>  | No                 | Mismatch                                                         | alternate locus too short/not found                          |                                      |
| Mammalia   | mMelMel3     | Meles meles                   | European badger            | VGP         | <a href="#">ub.io/genomeark</a>     | Yes                | Good                                                             | Slight Mismatch                                              |                                      |
| Mammalia   | mMesDen1     | Mesopiodon densirostris       | Blainville's beaked whale  | VGP         | <a href="#">org/vgp-all/Mesop</a>   | No                 | Good                                                             |                                                              |                                      |
| Mammalia   | mMicCal1.0   | Microtus californicus         | California Vole            | CCGP        | <a href="#">pecies/microtus/</a>    | Yes                | Break in Primary + Alternate Assembly                            |                                                              |                                      |
| Mammalia   | mMicMin1     | Micromys minutus              | European harvest mouse     | VGP         | <a href="#">rk.org/vgp-all/Mic</a>  | No                 | Mismatch                                                         | alternate locus too short/not found                          |                                      |
| Mammalia   | mMirAng1     | Mirounga angustirostris       | Northern Elephant Seal     | CCGP        | <a href="#">es/mirounga-angu</a>    | Yes                | Break in Alternate assembly                                      |                                                              |                                      |
| Mammalia   | mMonDom1     | Monodelphis domestica         | gray short-tailed opossum  | VGP         | <a href="#">omeark/species</a>      | No                 | Mismatch                                                         |                                                              |                                      |
| Mammalia   | mMunRee1     | Muntiacus reevesi             | Reeves' muntjac            | VGP         | <a href="#">rk.org/vgp-all/Mu</a>   | No                 | Good                                                             |                                                              |                                      |
| Mammalia   | mMusAve1     | Muscardinus avellanarius      | hazel dormouse             | VGP         | <a href="#">rg/vgp-all/Musca</a>    | No                 | Good                                                             | alternate locus too short/not found                          |                                      |
| Mammalia   | mMusLut2     | Mustela lutreola              | European mink              | VGP         | <a href="#">org/genomeark-a</a>     | No                 | Good                                                             |                                                              |                                      |
| Mammalia   | mMusNiv1     | Mustela nivalis               | Least weasel               | VGP         | <a href="#">i/genomeark-i</a>       | Yes                | Break in Alternate Assembly                                      |                                                              |                                      |
| Mammalia   | mMyoDau2     | Myotis daubentonii            | Daubenton's bat            | VGP         | <a href="#">rk.org/vgp-all/My</a>   | No                 | Mismatch                                                         | 2 IGH                                                        |                                      |
| Mammalia   | mMyoYum1.0   | Myotis yumanensis             | Yuma myotis                | CCGP        | <a href="#">pecies/myotis-y</a>     | Yes                | Break in Primary + Alternate Assembly                            | 2 IGH                                                        |                                      |
| Mammalia   | mNeoNeb1     | Neofelis nebulosa             | Clouded Leopard            | VGP         | <a href="#">i/genomeark/spec</a>    | No                 | Mismatch                                                         | Abnormal 2x coverage region; Short Alternate Assembly        |                                      |
| Mammalia   | mNycCou1     | Nycticebus coucang            | slow loris                 | VGP         | <a href="#">io/genomeark-all/I</a>  | No                 | Break in Alternate assembly                                      | Short Primary Assembly                                       |                                      |
| Mammalia   | mOrcOrc1     | Orcinus orca                  | killer whale               | VGP         | <a href="#">ub.io/genomeark</a>     | No                 | Good                                                             | Short Alternate Assembly                                     |                                      |
| Mammalia   | mOryCun1     | Oryctolagus cuniculus         | rabbit                     | VGP         | <a href="#">s.org/vgp-all/Oryc</a>  | No                 | Mismatch                                                         | alternate locus too short/not found                          |                                      |
| Mammalia   | mPanPan1     | Pan paniscus                  | Bonobo                     | T2T Primate | <a href="#">s/3/genomeark/sp</a>    | Yes                | Good                                                             |                                                              |                                      |
| Mammalia   | mPerMan1     | Peromyscus maniculatus        | deer mouse                 | CCGP        | <a href="#">pecies/peromysc</a>     | No                 | Break in Primary Assembly                                        | Slight Mismatch                                              |                                      |
| Mammalia   | mPhoPho1     | Phocoena phocoena             | harbor porpoise            | VGP         | <a href="#">k.org/vgp-all/Phoc</a>  | No                 | Mismatch                                                         |                                                              |                                      |
| Mammalia   | mPipPyg2     | Pipistrellus pygmaeus         | soprano pipistrelle        | VGP         | <a href="#">s.org/vgp-all/Pips</a>  | No                 | Good                                                             | Slight Mismatch                                              |                                      |
| Mammalia   | mPleAur1     | Plecotus auritus              | brown big-eared bat        | VGP         | <a href="#">ark.org/vgp-all/Ple</a> | No                 | Mismatch; Break in Primary Assembly                              | 2 IGH; alternate locus too short/not found                   |                                      |
| Mammalia   | mPonAbe1     | Pongo abelii                  | Sumatran orangutan         | T2T Primate | <a href="#">s/3/genomeark/sj</a>    | Yes                | Good                                                             |                                                              |                                      |
| Mammalia   | mPonPyg2     | Pongo pygmaeus                | Bornean orangutan          | T2T Primate | <a href="#">i/genomeark/spec</a>    | Yes                | Good                                                             |                                                              |                                      |
| Mammalia   | mPseCra1     | Pseudorca crassidens          | false killer whale         | VGP         | <a href="#">org/vgp-all/Pseu</a>    | Yes                | Good                                                             |                                                              |                                      |
| Mammalia   | mPumCon1.1   | Puma concolor                 | Mountain Lion              | CCGP        | <a href="#">rg/species/puma</a>     | Yes                | Good                                                             |                                                              |                                      |
| Mammalia   | mSorAra2/1   | Sorex araneus                 | Common shrew               | VGP         | <a href="#">b.io/genomeark-s</a>    | No                 | Mismatch                                                         | Abnormal hig coverage; Short Primary Assembly                |                                      |
| Mammalia   | mSteCoe1     | Stenella coeruleoalba         | striped dolphin            | VGP         | <a href="#">k.org/vgp-all/Sten</a>  | No                 | Mismatch                                                         |                                                              |                                      |
| Mammalia   | mTalEur1     | Talpa europaea                | European mole              | VGP         | <a href="#">ark.org/vgp-all/Ta</a>  | No                 | Mismatch; Break in Primary assembly                              | alternate locus too short/not found                          |                                      |
| Mammalia   | mThoBot1     | Thomomys bottae               | Botta's pocket gopher      | CCGP        | <a href="#">i/species/thomorr</a>   | No                 | Good                                                             |                                                              |                                      |
| Mammalia   | mUrsAme1     | Ursus americanus              | American black bear        | CCGP        | <a href="#">gov/datasets/gen</a>    | No                 | Good                                                             | Slight Mismatch; alternate locus too short/not found         |                                      |
| Mammalia   | mUrsArc2     | Ursus arctos                  | brown bear                 | NCBI        | <a href="#">gov/datasets/gen</a>    | No                 | Good                                                             | 2 IGH; Slight Mismatch                                       |                                      |
| Mammalia   | mVesMur1     | Vespertilio murinus           | particolored bat           | VGP         | <a href="#">rk.org/vgp-all/Ves</a>  | No                 | Mismatch                                                         | 2 IGH                                                        |                                      |
| Crocodylia | rAllMis2     | Alligator mississippiensis    | American alligator         | VGP         | <a href="#">omeark/specie</a>       | Yes                | Break in Primary Assembly                                        |                                                              |                                      |
| Testudines | rCarCar2     | Caretta caretta               | Loggerhead turtle          | VGP         | <a href="#">ark.org/vgp-all/C</a>   | Yes                | Break in Alternate Assembly; Double Coverage in Primary Assembly | Abnormal 2x coverage region                                  |                                      |
| Testudines | rEmyOrb1     | Emys orbicularis              | European pond turtle       | VGP         | <a href="#">ark.org/vgp-all/Er</a>  | Yes                | Break in Primary + Alternate Assembly                            |                                                              |                                      |
| Testudines | rEryReg1     | Erythrolamprus reginae        | royal ground snake         | VGP         | <a href="#">org/vgp-all/Eryth</a>   | No                 | Mismatch; Break in Primary Assembly                              |                                                              |                                      |
| Squamata   | rLiaOli1     | Liasis olivaceus              | olive python               | VGP         | <a href="#">ark.org/vgp-all/Li</a>  | Yes                | Break in Primary assembly                                        | Slight Mismatch                                              |                                      |
| Squamata   | rLiaOli2     | Liasis olivaceus              | olive python               | VGP         | <a href="#">ark.org/vgp-all/Li</a>  | Yes                | Break in Primary assembly                                        | Slight Mismatch                                              |                                      |
| Testudines | rMalTer1     | Malaclemys terrapin           | diamondback terrapin       | VGP         | <a href="#">k.org/vgp-all/Mali</a>  | Yes                | Break in Primary assembly                                        | Slight Mismatch                                              |                                      |
| Squamata   | rPodCre2     | Podarcis cretensis            | cretan wall lizard         | VGP         | <a href="#">rk.org/vgp-all/Po</a>   | No                 | Break in Primary assembly                                        | Slight Mismatch; alternate locus too short/not found         |                                      |

| Class    | IndividualID | LatinName          | CommonName             | Source | SourceLink                                                   | Haplotype Resolved | Evaluation Result                     | Special Condition                         | Curation Status |
|----------|--------------|--------------------|------------------------|--------|--------------------------------------------------------------|--------------------|---------------------------------------|-------------------------------------------|-----------------|
| Squamata | rPodRaf1     | Podarcis raffonei  | Aeolian wall lizard    | VGP    | <a href="http://ark.org/vgp-all/Pc">ark.org/vgp-all/Pc</a>   | No                 | Good                                  | alternate locus too short/not found       |                 |
| Squamata | rRhiFlo1     | Rhineura floridana | Florida worm lizard    | VGP    | <a href="http://ark.org/vgp-all/Rhi">ark.org/vgp-all/Rhi</a> | Yes                | Break in Primary + Alternate Assembly | Slight Mismatch; Short Alternate Assembly |                 |
| Squamata | rVipLat1     | Vipera latastei    | snub-nosed viper       | VGP    | <a href="http://ark.org/vgp-all/V">ark.org/vgp-all/V</a>     | No                 | Mismatch; Break in Primary Assembly   | alternate locus too short/not found       |                 |
| Squamata | rVipUrs1     | Vipera ursinii     | Hungarian meadow viper | VGP    | <a href="http://ark.org/vgp-all/V">ark.org/vgp-all/V</a>     | No                 | Mismatch; Break in Primary Assembly   | alternate locus too short/not found       |                 |
| Squamata | rZooViv1     | Zootoca vivipara   | common lizard          | VGP    | <a href="http://ark.org/vgp-all/Zc">ark.org/vgp-all/Zc</a>   | No                 | Mismatch                              | alternate locus too short/not found       |                 |

| Class      | IndividualID | LatinName                     | CommonName                 | Source      | SourceLink                          | Haplotype Resolved | Evaluation Result                               | Special Condition                                         |
|------------|--------------|-------------------------------|----------------------------|-------------|-------------------------------------|--------------------|-------------------------------------------------|-----------------------------------------------------------|
| Mammalia   | mApoSy1      | Apodemus sylvaticus           | wood mouse                 | VGP         | <a href="#">p/genomeark-all/A</a>   | No                 | Mismatch; Break in Primary + Alternate Assembly | Short Alternate Assembly                                  |
| Mammalia   | mBalAcu1     | Balaenoptera acutorostrata    | minke whale                | VGP         | <a href="#">rg/vgp-all/Balaen</a>   | No                 | Good                                            | alternate locus too short/not found                       |
| Mammalia   | mCamDro1     | Camelus dromedarius           | dromedary                  | VGP         | <a href="#">y/genomeark-all/C</a>   | Yes                | Good                                            |                                                           |
| Mammalia   | mCanLor1     | Canis lupus                   | Greenland Wolf             | VGP         | <a href="#">s/3/genomeark/s</a>     | No                 | Good                                            |                                                           |
| Mammalia   | mCanLor2     | Canis lupus                   | Greenland Wolf             | VGP         | <a href="#">s/3/genomeark/s</a>     | Yes                | Good                                            | All MapQ 0 reads                                          |
| Mammalia   | mCerEla1     | Cervus elaphus                | Red Deer                   | VGP         | <a href="#">s3/genomeark/spx</a>    | No                 | Good                                            |                                                           |
| Mammalia   | mCHINiv1     | Chionomys nivalis             | European snow vole         | VGP         | <a href="#">.io/genomeark-all</a>   | No                 | Mismatch                                        | Short Alternate Assembly                                  |
| Mammalia   | mDasNov1     | Dasyopus novemcinctus         | nine-banded armadillo      | VGP         | <a href="#">/genomeark-all/D</a>    | Yes                | Mismatch; Break in Primary + Alternate Assembly |                                                           |
| Mammalia   | mDelDel1     | Delphinus delphis             | saddleback dolphin         | VGP         | <a href="#">ark.org/vgp-all/De</a>  | No                 | Good                                            |                                                           |
| Mammalia   | mDicBic1     | Diceros bicornis              | black rhinoceros           | VGP         | <a href="#">b.io/genomeark-a</a>    | Yes                | Good                                            |                                                           |
| Mammalia   | mDipMer1     | Dipodomys merriami            | Merriam's Kangaroo Rat     | CCGP        | <a href="#">jes/dipodomys-m</a>     | No                 | Good                                            | 3 IGK                                                     |
| Mammalia   | mEleMax1     | Elephas maximus               | Asiatic Elephant           | VGP         | <a href="#">y/genomeark/spec</a>    | No                 | Good                                            |                                                           |
| Mammalia   | mEriEur2     | Erinaceus europaeus           | western European hedgehog  | VGP         | <a href="#">k.org/vgp-all/Erin</a>  | No                 | Good                                            | alternate locus too short/not found                       |
| Mammalia   | mEscRob2     | Eschrichtius robustus         | grey whale                 | VGP         | <a href="#">k.org/vgp-all/Esch</a>  | No                 | Good                                            |                                                           |
| Mammalia   | mEubGla1     | Eubalaena glacialis           | North Atlantic right whale | VGP         | <a href="#">rk.org/vgp-all/Eub</a>  | Yes                | Good                                            |                                                           |
| Mammalia   | mGloMel1     | Globicephala melas            | long-finned pilot whale    | VGP         | <a href="#">rk.org/vgp-all/Glo</a>  | No                 | Good                                            | alternate locus too short/not found                       |
| Mammalia   | mGorGor1     | Gorilla gorilla               | Gorilla                    | T2T Primate | <a href="#">s3/genomeark/sr</a>     | Yes                | Good                                            |                                                           |
| Mammalia   | mHetBru1     | Heterohyrax brucei            | Yellow-spotted hyrax       | VGP         | <a href="#">io/genomeark-all</a>    | No                 | Good                                            | alternate locus too short/not found                       |
| Mammalia   | mHipAmp2     | Hippopotamus amphibius kiboko | hippopotamus               | VGP         | <a href="#">ark-curated-asser</a>   | Yes                | Good                                            | Slight Mismatch                                           |
| Mammalia   | mHypAmp2     | Hyperoodon ampullatus         | northern bottlenose whale  | VGP         | <a href="#">org/vgp-all/Hyper</a>   | No                 | Mismatch                                        |                                                           |
| Mammalia   | mLagAlb1     | Lagenorhynchus albirostris    | white-beaked dolphin       | VGP         | <a href="#">rg/vgp-all/Lagena</a>   | No                 | Good                                            |                                                           |
| Mammalia   | mLemCat1     | Lemur catta                   | Ring-tailed lemur          | VGP         | <a href="#">ub.io/genomeark</a>     | No                 | Good                                            |                                                           |
| Mammalia   | mLynRuf1     | Lynx rufus                    | Bobcat                     | CCGP        | <a href="#">pject.org/species/</a>  | No                 | Good                                            | Short Alternate Assembly                                  |
| Mammalia   | mMacEug1     | Macropus eugenii              | tammar wallaby             | VGP         | <a href="#">.io/genomeark-all</a>   | No                 | Mismatch                                        | alternate locus too short/not found                       |
| Mammalia   | mManPen7     | Manis pentadactyla            | Chinese pangolin           | VGP         | <a href="#">io/genomeark-all</a>    | Yes                | Break in Alternate Assembly                     |                                                           |
| Mammalia   | mMarMar1     | Martes martes                 | European pine marten       | VGP         | <a href="#">eak.org/vgp-all/M</a>   | No                 | Mismatch                                        | alternate locus too short/not found                       |
| Mammalia   | mMelMel3     | Meles meles                   | European badger            | VGP         | <a href="#">ub.io/genomeark</a>     | Yes                | Good                                            | All MapQ 0 reads                                          |
| Mammalia   | mMesDen1     | Mesoplodon densirostris       | Blainville's beaked whale  | VGP         | <a href="#">org/vgp-all/Mesoc</a>   | No                 | Good                                            |                                                           |
| Mammalia   | mMicCal1.0   | Microtus californicus         | California Vole            | CCGP        | <a href="#">species/microtus</a>    | Yes                | Good                                            |                                                           |
| Mammalia   | mMicMin1     | Micromys minutus              | European harvest mouse     | VGP         | <a href="#">ark.org/vgp-all/Mic</a> | No                 | Mismatch                                        | alternate locus too short/not found                       |
| Mammalia   | mMirAng1     | Mirounga angustirostris       | Northern Elephant Seal     | CCGP        | <a href="#">es/mirounga-angu</a>    | Yes                | Good                                            | All MapQ 0 reads                                          |
| Mammalia   | mMonDom1     | Monodelphis domestica         | gray short-tailed opossum  | VGP         | <a href="#">nomeark/species</a>     | No                 | Mismatch; Break in Primary Assembly             | alternate locus too short/not found                       |
| Mammalia   | mMunRee1     | Muntiacus reevesi             | Reeves' muntjac            | VGP         | <a href="#">ark.org/vgp-all/Mu</a>  | No                 | Good                                            |                                                           |
| Mammalia   | mMusAve1     | Muscardinus avellanarius      | hazel dormouse             | VGP         | <a href="#">rg/vgp-all/Musca</a>    | No                 | Good                                            | Short Alternate Assembly                                  |
| Mammalia   | mMusLut2     | Mustela lutreola              | European mink              | VGP         | <a href="#">org/genomeark-a</a>     | No                 | Good                                            | Short Alternate Assembly                                  |
| Mammalia   | mMusNiv1     | Mustela nivalis               | Least weasel               | VGP         | <a href="#">.org/genomeark-i</a>    | Yes                | Break in Alternate Assembly                     | Most MapQ 0 reads                                         |
| Mammalia   | mNeoNeb1     | Neofelis nebulosa             | Clouded Leopard            | VGP         | <a href="#">/genomeark/spec</a>     | No                 | Good                                            |                                                           |
| Mammalia   | mNycCou1     | Nycticebus coucang            | slow loris                 | VGP         | <a href="#">io/genomeark-all</a>    | No                 | Good                                            |                                                           |
| Mammalia   | mOrcOrc1     | Orcinus orca                  | killer whale               | VGP         | <a href="#">ub.io/genomeark</a>     | No                 | Good                                            | alternate locus too short/not found                       |
| Mammalia   | mOryCun1     | Oryctolagus cuniculus         | rabbit                     | VGP         | <a href="#">c.org/vgp-all/Oryc</a>  | No                 | Mismatch                                        | alternate locus too short/not found; abnormal 2x coverage |
| Mammalia   | mPanPan1     | Pan paniscus                  | Bonobo                     | T2T Primate | <a href="#">s3/genomeark/sp</a>     | Yes                | Good                                            |                                                           |
| Mammalia   | mPerMan1     | Peromyscus maniculatus        | deer mouse                 | CCGP        | <a href="#">pecies/peromysci</a>    | No                 | Break in Alternate Assembly                     | Short Primary Assembly                                    |
| Mammalia   | mPhoPho1     | Phocoena phocoena             | harbor porpoise            | VGP         | <a href="#">k.org/vgp-all/Pho</a>   | No                 | Good                                            |                                                           |
| Mammalia   | mPonAbe1     | Pongo abelii                  | Sumatran orangutan         | T2T Primate | <a href="#">s3/genomeark/sr</a>     | Yes                | Good                                            |                                                           |
| Mammalia   | mPonPyg2     | Pongo pygmaeus                | Bornean orangutan          | T2T Primate | <a href="#">y/genomeark/spec</a>    | Yes                | Good                                            |                                                           |
| Mammalia   | mPseCra1     | Pseudorca crassidens          | false killer whale         | VGP         | <a href="#">c.org/vgp-all/Pseu</a>  | Yes                | Good                                            |                                                           |
| Mammalia   | mPumCon1.1   | Puma concolor                 | Mountain Lion              | CCGP        | <a href="#">rg/species/puma</a>     | Yes                | Good                                            |                                                           |
| Mammalia   | mSorAra2/1   | Sorex araneus                 | Common shrew               | VGP         | <a href="#">b.io/genomeark-i</a>    | No                 | Mismatch; Break in Primary Assembly             | HUGE BREAK , Short Alternate Assembly                     |
| Mammalia   | mSteCoe1     | Stenella coeruleoalba         | striped dolphin            | VGP         | <a href="#">k.org/vgp-all/Sten</a>  | No                 | Good                                            |                                                           |
| Mammalia   | mTalEur1     | Talpa europaea                | European mole              | VGP         | <a href="#">ark.org/vgp-all/Ta</a>  | No                 | Good                                            |                                                           |
| Mammalia   | mThoBot1     | Thomomys botae                | Botta's pocket gopher      | CCGP        | <a href="#">g/species/thomom</a>    | No                 | Good                                            | Short Primary Assembly                                    |
| Mammalia   | mUrsAme1     | Ursus americanus              | American black bear        | CCGP        | <a href="#">gov/datasets/geni</a>   | No                 | Good                                            | alternate locus too short/not found                       |
| Mammalia   | mUrsArc2     | Ursus arctos                  | brown bear                 | NCBI        | <a href="#">gov/datasets/geni</a>   | No                 | Good                                            |                                                           |
| Crocodylia | rAllMis2     | Alligator mississippiensis    | American alligator         | VGP         | <a href="#">enomeark/specie</a>     | Yes                | Good                                            | Most MapQ 0 reads                                         |
| Testudines | rCarCar2     | Caretta caretta               | Loggerhead turtle          | VGP         | <a href="#">eak.org/vgp-all/C</a>   | Yes                | Good                                            |                                                           |
| Testudines | rEmyOrb1     | Emys orbicularis              | European pond turtle       | VGP         | <a href="#">ark.org/vgp-all/Em</a>  | Yes                | Good                                            | Slight Mismatch; Short Primary Assembly                   |
| Testudines | rMalTer1     | Malaclemys terrapin           | diamondback terrapin       | VGP         | <a href="#">rk.org/vgp-all/Mali</a> | Yes                | Good                                            | Short Primary Assembly                                    |

| Class      | IndividualID | LatinName                     | CommonName                 | Source      | SourceLink                          | Haplotype Resolved | Evaluation Result                               | Special Condition                                    |
|------------|--------------|-------------------------------|----------------------------|-------------|-------------------------------------|--------------------|-------------------------------------------------|------------------------------------------------------|
| Mammalia   | mApoSyl1     | Apodemus sylvaticus           | wood mouse                 | VGP         | <a href="#">p/genomeark-all/A</a>   | No                 | Mismatch; Break in Primary Assembly             | alternate locus too short/not found                  |
| Mammalia   | mBalAcu1     | Balaenoptera acutorostrata    | minke whale                | VGP         | <a href="#">rg/vgp-all/Balaen</a>   | No                 | Good                                            |                                                      |
| Mammalia   | mCamDro1     | Camelus dromedarius           | dromedary                  | VGP         | <a href="#">y/genomeark-all/C</a>   | Yes                | Good                                            |                                                      |
| Mammalia   | mCanLor1     | Canis lupus                   | Greenland Wolf             | VGP         | <a href="#">s/s3/genomeark/s</a>    | No                 | Mismatch; Break in Primary Assembly             | alternate locus too short/not found                  |
| Mammalia   | mCanLor2     | Canis lupus                   | Greenland Wolf             | VGP         | <a href="#">s/s3/genomeark/s</a>    | Yes                | Break in Primary + Alternate Assembly           |                                                      |
| Mammalia   | mCerEla1     | Cervus elaphus                | Red Deer                   | VGP         | <a href="#">s3/genomeark/spx</a>    | No                 | Good                                            | Short Alternate Assembly                             |
| Mammalia   | mCorTow1.0   | Corynorhinus townsendii       | Townsend's Big-eared Bat   | CCGP        | <a href="#">y/corynorhinus-toy</a>  | Yes                | Good                                            | Slight Mismatch                                      |
| Mammalia   | mCynVol1     | Cynocephalus volans           | Philippine flying lemur    | VGP         | <a href="#">genomeark/speci</a>     | No                 | Mismatch                                        | alternate locus too short/not found                  |
| Mammalia   | mDasNov1     | Dasyopus novemcinctus         | nine-banded armadillo      | VGP         | <a href="#">y/genomeark-all/D</a>   | Yes                | Mismatch; Break in Primary + Alternate Assembly |                                                      |
| Mammalia   | mDelDel1     | Delphinus delphis             | saddleback dolphin         | VGP         | <a href="#">ark.org/vgp-all/De</a>  | No                 | Mismatch                                        |                                                      |
| Mammalia   | mDicBic1     | Diceros bicornis              | black rhinoceros           | VGP         | <a href="#">b.io/genomeark-a</a>    | Yes                | Break in Alternate Assembly                     | Slight Mismatch                                      |
| Mammalia   | mEleMax1     | Elephas maximus               | Asiatic Elephant           | VGP         | <a href="#">y/genomeark/spec</a>    | No                 | Good                                            |                                                      |
| Mammalia   | mEptNil1     | Eptesicus nilssonii           | northern bat               | VGP         | <a href="#">rk.org/vgp-all/Ept</a>  | No                 | Good                                            | Slight Mismatch                                      |
| Mammalia   | mEriEur2     | Erinaceus europaeus           | western European hedgehog  | VGP         | <a href="#">k.org/vgp-all/Erin</a>  | No                 | Mismatch; Break in Primary Assembly             | alternate locus too short/not found                  |
| Mammalia   | mEscRob2     | Eschrichtius robustus         | grey whale                 | VGP         | <a href="#">k.org/vgp-all/Esch</a>  | No                 | Good                                            |                                                      |
| Mammalia   | mEubGla1     | Eubalaena glacialis           | North Atlantic right whale | VGP         | <a href="#">rk.org/vgp-all/Eub</a>  | Yes                | Good                                            | All MapQ 0 reads                                     |
| Mammalia   | mGloMel1     | Globicephala melas            | long-finned pilot whale    | VGP         | <a href="#">rk.org/vgp-all/Glo</a>  | No                 | Mismatch; Break in Primary Assembly             | alternate locus too short/not found                  |
| Mammalia   | mGorGor1     | Gorilla gorilla               | Gorilla                    | T2T Primate | <a href="#">s3/genomeark/sr</a>     | Yes                | Good                                            |                                                      |
| Mammalia   | mHetBru1     | Heterohyrax brucei            | Yellow-spotted hyrax       | VGP         | <a href="#">io/genomeark-all/</a>   | No                 | Mismatch                                        |                                                      |
| Mammalia   | mHipAmp2     | Hippopotamus amphibius kiboko | hippopotamus               | VGP         | <a href="#">ark-curated-asser</a>   | Yes                | Break in Alternate Assembly                     | All MapQ 0 reads                                     |
| Mammalia   | mHypAmp2     | Hyperoodon ampullatus         | northern bottlenose whale  | VGP         | <a href="#">org/vgp-all/Hyper</a>   | No                 | Good                                            | Short Alternate Assembly                             |
| Mammalia   | mLagAlb1     | Lagenorhynchus albirostris    | white-beaked dolphin       | VGP         | <a href="#">rg/vgp-all/Lageno</a>   | No                 | Mismatch                                        | alternate locus too short/not found                  |
| Mammalia   | mLemCat1     | Lemur catta                   | Ring-tailed lemur          | VGP         | <a href="#">ub.io/genomeark</a>     | No                 | Break in Primary + Alternate Assembly           | Slight Mismatch                                      |
| Mammalia   | mLynRuf1     | Lynx rufus                    | Bobcat                     | CCGP        | <a href="#">oject.org/species/</a>  | No                 | Good                                            | Slight Mismatch; alternate locus too short/not found |
| Mammalia   | mMacEug1     | Macropus eugenii              | tammar wallaby             | VGP         | <a href="#">i.io/genomeark-all</a>  | No                 | Break in Primary Assembly                       | alternate locus too short/not found                  |
| Mammalia   | mManPen7     | Manis pentadactyla            | Chinese pangolin           | VGP         | <a href="#">io/genomeark-all/</a>   | Yes                | Good                                            | All MapQ 0 reads                                     |
| Mammalia   | mMarMar1     | Martes martes                 | European pine marten       | VGP         | <a href="#">eak.org/vgp-all/M</a>   | No                 | Mismatch                                        | alternate locus too short/not found                  |
| Mammalia   | mMelMel3     | Meles meles                   | European badger            | VGP         | <a href="#">ub.io/genomeark</a>     | Yes                | Good                                            | Most MapQ 0 reads                                    |
| Mammalia   | mMesDen1     | Mesoplodon densirostris       | Blainville's beaked whale  | VGP         | <a href="#">org/vgp-all/Mesor</a>   | No                 | Good                                            |                                                      |
| Mammalia   | mMicCal1.0   | Microtus californicus         | California Vole            | CCGP        | <a href="#">species/microtus/</a>   | Yes                | Good                                            | Short Primary Assembly                               |
| Mammalia   | mMicMin1     | Micromys minutus              | European harvest mouse     | VGP         | <a href="#">rk.org/vgp-all/Mik</a>  | No                 | Mismatch; Break in Primary Assembly             | alternate locus too short/not found                  |
| Mammalia   | mMirAng1     | Mirounga angustirostris       | Northern Elephant Seal     | CCGP        | <a href="#">es/mirounga-ang</a>     | Yes                | Break in Primary + Alternate Assembly           | 2 IGL                                                |
| Mammalia   | mMonDom1     | Monodelphis domestica         | gray short-tailed opossum  | VGP         | <a href="#">nomeark/species/</a>    | No                 | Break in Primary Assembly                       | alternate locus too short/not found                  |
| Mammalia   | mMunRee1     | Muntiacus reevesi             | Reeves' muntjac            | VGP         | <a href="#">rk.org/vgp-all/Mu</a>   | No                 | Good                                            | Slight Mismatch; alternate locus too short/not found |
| Mammalia   | mMusAve1     | Muscardinus avellanarius      | hazel dormouse             | VGP         | <a href="#">rg/vgp-all/Musca</a>    | No                 | Mismatch                                        | alternate locus too short/not found                  |
| Mammalia   | mMusLut2     | Mustela lutreola              | European mink              | VGP         | <a href="#">org/genomeark-a</a>     | No                 | Good                                            | Slight Mismatch; Short Alternate Assembly            |
| Mammalia   | mMusNiv1     | Mustela nivalis               | Least weasel               | VGP         | <a href="#">.org/genomeark-s</a>    | Yes                | Mismatch; Break in Primary + Alternate Assembly |                                                      |
| Mammalia   | mMyoDau2     | Myotis daubentonii            | Daubenton's bat            | VGP         | <a href="#">rk.org/vgp-all/My</a>   | No                 | Mismatch                                        | alternate locus too short/not found                  |
| Mammalia   | mMyoYum1.0   | Myotis yumanensis             | Yuma myotis                | CCGP        | <a href="#">y/species/myotis-1</a>  | Yes                | Good                                            | Short Primary Assembly                               |
| Mammalia   | mNeoNeb1     | Neofelis nebulosa             | Clouded Leopard            | VGP         | <a href="#">y/genomeark/spec</a>    | No                 | Good                                            | alternate locus too short/not found                  |
| Mammalia   | mNycCou1     | Nycticebus coucang            | slow loris                 | VGP         | <a href="#">io/genomeark-all/</a>   | No                 | Mismatch; Break in Primary Assembly             | extremely abnormal coverage in Alternate Assembly    |
| Mammalia   | mOrcOrc1     | Orcinus orca                  | killer whale               | VGP         | <a href="#">ub.io/genomeark</a>     | No                 | Good                                            | alternate locus too short/not found                  |
| Mammalia   | mOryCun1     | Oryctolagus cuniculus         | rabbit                     | VGP         | <a href="#">c.org/vgp-all/Oryc</a>  | No                 | Good                                            | alternate locus too short/not found                  |
| Mammalia   | mPanPan1     | Pan paniscus                  | Bonobo                     | T2T Primate | <a href="#">s3/genomeark/sp</a>     | Yes                | Good                                            |                                                      |
| Mammalia   | mPerMan1     | Peromyscus maniculatus        | deer mouse                 | CCGP        | <a href="#">pecies/beromysc</a>     | No                 | Good                                            | Slight Mismatch; Short Alternate Assembly            |
| Mammalia   | mPhoPho1     | Phocoena phocoena             | harbor porpoise            | VGP         | <a href="#">k.org/vgp-all/Pho</a>   | No                 | Mismatch                                        | Short Alternate Assembly                             |
| Mammalia   | mPipPyg2     | Pipistrellus pygmaeus         | soprano pipistrelle        | VGP         | <a href="#">c.org/vgp-all/Pipis</a> | No                 | Good                                            |                                                      |
| Mammalia   | mPonAbe1     | Pongo abelii                  | Sumatran orangutan         | T2T Primate | <a href="#">s3/genomeark/sr</a>     | Yes                | Good                                            |                                                      |
| Mammalia   | mPonPyg2     | Pongo pygmaeus                | Bornean orangutan          | T2T Primate | <a href="#">y/genomeark/spec</a>    | Yes                | Good                                            |                                                      |
| Mammalia   | mPseCra1     | Pseudorca crassidens          | false killer whale         | VGP         | <a href="#">c.org/vgp-all/Pseu</a>  | Yes                | Good                                            |                                                      |
| Mammalia   | mPumCon1.1   | Puma concolor                 | Mountain Lion              | CCGP        | <a href="#">rg/species/puma</a>     | Yes                | Good                                            |                                                      |
| Mammalia   | mSorAra2/1   | Sorex araneus                 | Common shrew               | VGP         | <a href="#">b.io/genomeark-s</a>    | No                 | Mismatch; Break in Primary Assembly             | Short Alternate Assembly                             |
| Mammalia   | mSteCoe1     | Stenella coeruleoalba         | striped dolphin            | VGP         | <a href="#">k.org/vgp-all/Sten</a>  | No                 | Mismatch                                        | Short Alternate Assembly                             |
| Mammalia   | mTalEur1     | Talpa europaea                | European mole              | VGP         | <a href="#">ark.org/vgp-all/Ta</a>  | No                 | Break in Primary Assembly                       | alternate locus too short/not found                  |
| Mammalia   | mUrsAme1     | Ursus americanus              | American black bear        | CCGP        | <a href="#">gov/datasets/geni</a>   | No                 | Break in Primary Assembly                       | 2 IGL but on same chrom                              |
| Mammalia   | mUrsArc2     | Ursus arctos                  | brown bear                 | NCBI        | <a href="#">gov/datasets/geni</a>   | No                 | Mismatch                                        |                                                      |
| Mammalia   | mVesMur1     | Vespertilio murinus           | particolored bat           | VGP         | <a href="#">rk.org/vgp-all/Ves</a>  | No                 | Good                                            |                                                      |
| Crocodylia | rAllMis2     | Alligator mississippiensis    | American alligator         | VGP         | <a href="#">enomeark/specie</a>     | Yes                | Good                                            |                                                      |
| Testudines | rCarCar2     | Caretta caretta               | Loggerhead turtle          | VGP         | <a href="#">eak.org/vgp-all/C</a>   | Yes                | Break in Primary Assembly                       | Slight Mismatch                                      |
| Testudines | rEmyOrb1     | Emys orbicularis              | European pond turtle       | VGP         | <a href="#">ark.org/vgp-all/Em</a>  | Yes                | Good                                            |                                                      |
| Testudines | rMalTer1     | Malaclemys terrapin           | diamondback terrapin       | VGP         | <a href="#">k.org/vgp-all/Mali</a>  | Yes                | Good                                            |                                                      |
